# Supplementary material for: A unified rodent atlas reveals the cellular complexity and evolutionary divergence of the dorsal vagal complex
Source: eLife. 2025 Oct 7;14:RP106217. doi: 10.7554/eLife.106217 (PMC12503491; doi:10.7554/eLife.106217)
Supplement: Supplementary file 1. — We used four databases included in the scRNAseq v2.16.0 (Marques et al., 2016; Campbell et al., 2017; Chen et al., 2017; Romanov et al., 2017; Risso and Cole, 2025) R package and the celldex v1.12.0 built-in mouse RNA-seq reference (which we called ‘SingleR’ database) using SingleR (Aran et al., 2019) function to transfer labels to our dataset in R (R Development Core Team, 2023). The name, brain area, and reference in which each database was made public are specified. [file elife-106217-supp1.xlsx]

## Sheet: S1
database	brain_region	Reference
SingleR	NA	NA
Chen	hypothalamus	R. Chen, X. Wu, L. Jiang, Y. Zhang, Single-Cell RNA-Seq Reveals Hypothalamic Cell Diversity, Cell Rep. 18 (2017) 3227-41. 10.1016/j.celrep.2017.03.004.
Tasic	Cortex	B. Tasic, V. Menon, T.N. Nguyen, T.K. Kim, T. Jarsky, Z. Yao, et al., Adult mouse cortical cell taxonomy revealed by single cell transcriptomics, Nat Neurosci. 19 (2016) 335-46. 10.1038/nn.4216.
Romanov	hypothalamus	R.A. Romanov, A. Zeisel, J. Bakker, F. Girach, A. Hellysaz, R. Tomer, et al., Molecular interrogation of hypothalamic organization reveals distinct dopamine neuronal subtypes, Nat Neurosci. 20 (2017) 176-88. 10.1038/nn.4462.
Campbell	hypothalamus/median_eminence	J.N. Campbell, E.Z. Macosko, H. Fenselau, T.H. Pers, A. Lyubetskaya, D. Tenen, et al., A molecular census of arcuate hypothalamus and median eminence cell types, Nat Neurosci. 20 (2017) 484-96. 10.1038/nn.4495.
