# Supplementary material for: A unified rodent atlas reveals the cellular complexity and evolutionary divergence of the dorsal vagal complex
Source: eLife. 2025 Oct 7;14:RP106217. doi: 10.7554/eLife.106217 (PMC12503491; doi:10.7554/eLife.106217)
Supplement: Supplementary file 2. — We thoroughly searched in the literature for established markers at the mRNA and/or protein level. Some markers were found to be described for more than one cell population which are specified in columns ‘notes’ and ‘notes_2’. After initial labeling of our murine dataset with the databases as described, we proceeded to obtain the average expression (on log-normalized counts) of each gene coding for the markers for the labeled cells (i.e. astrocyte, endothelial, microglia, neuron, and oligodendrocyte) and unlabeled cells (i.e. unknown). We also calculated the average expression for each cluster in our dataset, established during our processing pipeline, at resolution 1.0. [file elife-106217-supp2.xlsx]

## Sheet: S2
marker	marker_type	coding_gene	organism	population_1	population_specifics_1	organ_1	site_1	notes	notes_2	brainstem_confirmed	tissue_specifics	reference	astrocyte	endothelial	microglia	neuron	oligodendrocyte	unknown	cluster_0	cluster_01	cluster_02	cluster_03	cluster_04	cluster_05	cluster_06	cluster_07	cluster_08	cluster_09	cluster_10	cluster_11	cluster_12	cluster_13	cluster_14	cluster_15	cluster_16	cluster_17	cluster_18	cluster_19	cluster_20	cluster_21	cluster_22	cluster_23	cluster_24	cluster_25	cluster_26	cluster_27	cluster_28	cluster_29	cluster_30
RL29	mRNA	Rpl29	Mus musculus	neuron	preganglionic_parasympatetic	CNS	spine					M.J. Park, K. Chung, Endogenous lectin (RL-29) expression of the autonomic preganglionic neurons in the rat spinal cord, The Anatomical Record. 254 (1999) 54-60. 10.1002/%28SICI%291097-0185%2819990101%29254%3A1%3C53%3A%3AAID-AR7%3E3.0.CO%3B2-H.	-0.0719566	0.47036	0.1257	-0.0211724	0.0347828	0.0282008	0.0479991	-0.0683917	0.0494088	0.00315917	-0.00576625	-0.000741619	-0.0503409	-0.0038423	-0.015362	0.113735	-0.0576772	-0.0559646	0.0110452	-0.00664192	-0.0307117	-0.0380292	-0.00933943	-0.0592799	-0.0872667	-0.0116816	-0.120818	-0.0178925	-0.0421242	-0.0420346	-0.0432397	-0.0529193	0.00585734	0.611888	-0.0348555	-0.027804	-0.0989497
Pax2	mRNA	Pax2	Mus musculus	neuron	glycinergic_neuron	brain	spinal_dorsal_horn			yes		C.O. Miranda, K. Hegedus, H. Wildner, H.U. Zeilhofer, M. Antal, Morphological and neurochemical characterization of glycinergic neurons in laminae I-IV of the mouse spinal dorsal horn, J Comp Neurol. 530 (2022) 607-26. 10.1002/cne.25232.	-0.332476	-0.306426	-0.341639	0.363479	-0.345226	-0.274942	-0.344384	-0.338666	-0.345562	0.962172	-0.34609	-0.0702949	0.834956	1.40917	-0.327442	-0.324647	0.834035	1.42871	-0.320284	0.135175	-0.32996	-0.326684	-0.33243	-0.339526	0.502738	-0.314364	-0.337326	-0.141785	0.347156	-0.346124	-0.342837	-0.341491	-0.325042	-0.314926	-0.35577	2.21817	-0.318742
nNOS	mRNA	Nos1	Mus musculus	neuron	glycinergic_neuron	brain	spinal_dorsal_horn	preganglionic		yes		C.O. Miranda, K. Hegedus, H. Wildner, H.U. Zeilhofer, M. Antal, Morphological and neurochemical characterization of glycinergic neurons in laminae I-IV of the mouse spinal dorsal horn, J Comp Neurol. 530 (2022) 607-26. 10.1002/cne.25232.	-0.182148	-0.0305088	-0.193033	0.186639	-0.176597	-0.130752	-0.168526	-0.185985	-0.179843	0.20267	-0.190279	0.12404	0.144275	0.269445	0.468389	-0.185757	0.211492	0.945636	-0.0278607	0.344177	-0.0796792	0.046034	-0.177188	0.194767	-0.141523	-0.0450881	-0.171558	0.00834484	0.149249	-0.20387	0.349371	-0.202492	-0.187667	0.0596248	-0.138057	-0.00438902	-0.0990451
RET	mRNA	Ret	Mus musculus	neuron	glycinergic_neuron	brain	spinal_dorsal_horn					C.O. Miranda, K. Hegedus, H. Wildner, H.U. Zeilhofer, M. Antal, Morphological and neurochemical characterization of glycinergic neurons in laminae I-IV of the mouse spinal dorsal horn, J Comp Neurol. 530 (2022) 607-26. 10.1002/cne.25232.	-0.138979	0.255762	-0.143986	0.149304	-0.151681	-0.115162	-0.14681	-0.141509	-0.149412	0.279973	-0.163435	0.060938	-0.0444681	0.344268	0.0624861	-0.122873	0.0901202	0.0853377	-0.106516	0.221358	-0.0162125	0.0220134	-0.139572	0.371803	0.00393907	0.0663213	-0.109251	0.0203321	-0.0161318	-0.152254	0.243754	0.0588669	-0.136615	0.240854	-0.0340379	0.96979	-0.175008
NPY	mRNA	Npy	Mus musculus	neuron	glycinergic_neuron	brain	spinal_dorsal_horn					C.O. Miranda, K. Hegedus, H. Wildner, H.U. Zeilhofer, M. Antal, Morphological and neurochemical characterization of glycinergic neurons in laminae I-IV of the mouse spinal dorsal horn, J Comp Neurol. 530 (2022) 607-26. 10.1002/cne.25232.	-0.0141546	-0.0571858	0.0148708	0.00976379	-0.0239588	-0.027524	-0.0196079	-0.0367902	-0.00918202	-0.0322526	-0.0521944	-0.0463168	-0.0802097	0.476328	-0.0192735	0.00940515	-0.0742756	0.178671	-0.0688732	-0.0415675	0.048023	-0.0298223	-0.0367487	0.269586	-0.0802869	-0.0810754	0.130751	0.00834142	-0.0512537	-0.0719884	-0.0933796	-0.0327186	-0.0754337	-0.0343993	-0.095034	-0.0224799	-0.0786661
Calretinin	mRNA	Calb2	Mus musculus	neuron	glycinergic_neuron	brain	spinal_dorsal_horn					C.O. Miranda, K. Hegedus, H. Wildner, H.U. Zeilhofer, M. Antal, Morphological and neurochemical characterization of glycinergic neurons in laminae I-IV of the mouse spinal dorsal horn, J Comp Neurol. 530 (2022) 607-26. 10.1002/cne.25232.	-0.100776	-0.0843213	-0.0655761	0.069563	-0.0569825	-0.0290341	-0.0458083	-0.0967017	-0.0602232	0.159726	-0.0778542	0.0848496	-0.120801	-0.104878	0.36436	-0.055027	0.0376361	0.0680531	0.274698	0.0998877	-0.0944891	0.0172013	0.0142778	-0.0158315	-0.0540797	0.0874885	-0.104673	0.0702003	0.1402	-0.113883	-0.0281392	-0.129468	-0.06399	-0.0601445	0.00677495	-0.0173674	-0.0922704
Tcf7l2	nuclear_mRNA_protein	Tcf7l2	Mus musculus	oligodendrocyte	premyelinating_OL	brain	brain					F. Guo, Y. Wang, TCF7l2, a nuclear marker that labels premyelinating oligodendrocytes and promotes oligodendroglial lineage progression, Glia. 71 (2023) 143-54. 10.1002/glia.24249.	1.02099	0.109017	0.613461	-0.386255	0.0346276	0.728998	0.0605825	1.03268	0.0420521	-0.389038	-0.0764386	-0.388285	-0.388268	-0.393187	-0.385361	0.587531	-0.386985	-0.394942	-0.393551	-0.388212	-0.387687	-0.390355	0.67466	-0.388639	-0.382886	-0.391203	0.889278	-0.358438	-0.384164	1.17046	-0.385159	-0.390044	1.14155	0.0773294	-0.384139	-0.391502	0.606881
TH	mRNA	Th	non_specific	neuron	catecholamin_neuron	brain	brain	dopaergic_neuron		yes		E. Weihe, C. Depboylu, B. Schutz, M.K. Schafer, L.E. Eiden, Three types of tyrosine hydroxylase-positive CNS neurons distinguished by dopa decarboxylase and VMAT2 co-expression, Cell Mol Neurobiol. 26 (2006) 659-78. 10.1007/s10571-006-9053-9.	-0.0630922	-0.0835211	-0.0792082	0.0434372	-0.0722037	-0.0438291	-0.0736583	-0.0625496	-0.0706191	-0.0664676	-0.06749	-0.0305556	-0.0347856	-0.0333367	0.209199	-0.0752288	-0.0107461	-0.0322354	0.0018574	-0.0462346	0.108556	-0.00953971	-0.0738189	0.976217	-0.00698699	-0.0405456	-0.0607763	-0.0546836	-0.00131428	-0.0835211	-0.0566527	0.917615	-0.0584065	-0.0581218	-0.0669193	-0.0503192	0.0493536
AADC	mRNA	Ddc	non_specific	neuron	catecholamin_neuron	brain	brain			yes		E. Weihe, C. Depboylu, B. Schutz, M.K. Schafer, L.E. Eiden, Three types of tyrosine hydroxylase-positive CNS neurons distinguished by dopa decarboxylase and VMAT2 co-expression, Cell Mol Neurobiol. 26 (2006) 659-78. 10.1007/s10571-006-9053-9.	-0.192397	1.13788	-0.148272	-0.0417011	0.14003	-0.107308	0.122332	-0.191517	0.213328	-0.174402	0.0765014	-0.145007	-0.202117	-0.199359	0.239215	-0.142673	-0.200743	-0.164684	-0.0804429	-0.180694	-0.145772	-0.164376	-0.194645	2.32459	-0.19515	-0.190077	-0.200411	-0.15507	-0.0829676	0.414877	-0.20101	-0.196841	-0.180708	0.863296	-0.196802	-0.205866	-0.211322
DbetaH	mRNA	Dbh	non_specific	neuron	catecholamin_neuron	brain	brain			yes		E. Weihe, C. Depboylu, B. Schutz, M.K. Schafer, L.E. Eiden, Three types of tyrosine hydroxylase-positive CNS neurons distinguished by dopa decarboxylase and VMAT2 co-expression, Cell Mol Neurobiol. 26 (2006) 659-78. 10.1007/s10571-006-9053-9.	-0.0626015	-0.0580394	-0.0617369	0.0291156	-0.0606385	-0.043714	-0.0592671	-0.0625137	-0.0629985	-0.0664858	-0.0608458	-0.0606034	-0.0494224	-0.0622912	0.117737	-0.058094	-0.0633261	-0.0542972	-0.0271004	-0.0527098	-0.0588336	-0.0621136	-0.0521887	1.95796	-0.0746642	-0.068647	-0.0595143	-0.045852	-0.0664188	-0.0545952	-0.0610838	-0.0746642	-0.0621179	-0.0492872	-0.0746642	-0.049613	-0.0294187
VMAT2	mRNA	Slc18a2	non_specific	neuron	catecholamin_neuron	brain	brain			yes		E. Weihe, C. Depboylu, B. Schutz, M.K. Schafer, L.E. Eiden, Three types of tyrosine hydroxylase-positive CNS neurons distinguished by dopa decarboxylase and VMAT2 co-expression, Cell Mol Neurobiol. 26 (2006) 659-78. 10.1007/s10571-006-9053-9.	-0.150047	-0.140311	-0.0134149	0.122452	-0.11468	-0.0741058	-0.120158	-0.149491	-0.112212	0.108315	-0.109005	0.081383	-0.00744054	0.0777108	0.0495096	0.00168354	0.135253	0.0196052	0.0185942	0.108045	0.0284459	0.0243484	-0.102162	1.03035	0.409525	0.131302	-0.144077	-0.08697	0.0406856	-0.0171215	0.0677567	0.077637	-0.0827501	-0.141311	0.140444	0.0207258	0.0337216
Selplg	mRNA	Selplg	Mus musculus	microglia		brain	brain				adult	J. Sun, Y. Song, Z. Chen, J. Qiu, S. Zhu, L. Wu, et al., Heterogeneity and Molecular Markers for CNS Glial Cells Revealed by Single-Cell Transcriptomics, Cell Mol Neurobiol. 42 (2022) 2629-42. 10.1007/s10571-021-01159-3.	-0.131581	-0.147199	5.11705	-0.129315	-0.127698	-0.0232702	-0.130986	-0.136998	-0.136863	-0.137787	-0.13443	-0.13253	-0.132076	-0.139044	-0.105548	5.05176	-0.136977	-0.135227	-0.125769	-0.136284	-0.134932	-0.104728	-0.115314	-0.12526	-0.14246	-0.137416	-0.133087	-0.104804	-0.141563	-0.142905	-0.138181	-0.130177	-0.110104	-0.141268	-0.123417	-0.133296	-0.129881
Ptprz1	mRNA	Ptprz1	non_specific	oligodendrocyte	OPC	brain	brain					J. Sun, Y. Song, Z. Chen, J. Qiu, S. Zhu, L. Wu, et al., Heterogeneity and Molecular Markers for CNS Glial Cells Revealed by Single-Cell Transcriptomics, Cell Mol Neurobiol. 42 (2022) 2629-42. 10.1007/s10571-021-01159-3.	1.66568	-0.515117	-0.531255	-0.0960625	-0.542792	0.755469	-0.538474	1.70914	-0.546186	-0.133945	-0.547856	-0.0911588	-0.0712918	-0.289539	-0.0521237	-0.501898	-0.00345789	0.21071	-0.206183	0.1463	0.0943742	0.0582052	2.55379	-0.255737	-0.0902758	-0.174613	1.33934	-0.256294	-0.0336776	-0.160918	0.267418	-0.524046	-0.502765	-0.441473	-0.517361	-0.386223	-0.459672
Ng2	mRNA	Cspg4	non_specific	oligodendrocyte	OPC	brain	brain	mural_brain				J. Sun, Y. Song, Z. Chen, J. Qiu, S. Zhu, L. Wu, et al., Heterogeneity and Molecular Markers for CNS Glial Cells Revealed by Single-Cell Transcriptomics, Cell Mol Neurobiol. 42 (2022) 2629-42. 10.1007/s10571-021-01159-3.	-0.104918	0.352322	-0.140737	-0.138372	-0.033983	1.61931	-0.0520334	-0.105236	-0.000685006	-0.143867	-0.0377203	-0.142073	-0.140593	-0.136839	-0.141165	-0.139928	-0.136385	-0.145329	-0.143134	-0.14416	-0.140015	-0.145163	4.25327	-0.142401	-0.114183	-0.137722	-0.104725	-0.125787	-0.120122	0.153872	-0.134	-0.145785	-0.0963386	0.390831	-0.130958	-0.141313	-0.0379585
GalC	mRNA	Galc	non_specific	oligodendrocyte	postmitotic_OL	brain	brain					J. Sun, Y. Song, Z. Chen, J. Qiu, S. Zhu, L. Wu, et al., Heterogeneity and Molecular Markers for CNS Glial Cells Revealed by Single-Cell Transcriptomics, Cell Mol Neurobiol. 42 (2022) 2629-42. 10.1007/s10571-021-01159-3.	-0.100674	-0.211799	0.0230804	0.164176	-0.209094	0.0119606	-0.215944	-0.112843	-0.18801	0.233618	-0.21914	0.164478	0.0729442	0.304058	0.165967	0.00134393	0.184101	0.15085	0.184052	0.158687	0.208389	0.168727	-0.0176599	0.0934576	0.0548997	0.17068	-0.0629207	-0.142742	0.150901	-0.185934	0.0459352	0.0975625	-0.209094	-0.194722	0.178944	0.223469	-0.0323375
Leptin_receptor	mRNA	Lepr	Rattus rattus	ependymal	vagliocyte	brain	DVC			yes		M. Dallaporta, M.S. Bonnet, K. Horner, J. Trouslard, A. Jean, J.D. Troadec, Glial cells of the nucleus tractus solitarius as partners of the dorsal hindbrain regulation of energy balance: a proposal for a working hypothesis, Brain Res. 1350 (2010) 35-42. 10.1016/j.brainres.2010.04.025.	-0.209239	0.395059	-0.229152	0.171875	-0.211858	0.221745	-0.214722	-0.219076	-0.216122	0.308488	-0.204387	0.401138	0.0336552	-0.154088	-0.0371013	-0.209538	0.392003	-0.043287	0.017514	0.504941	0.209121	0.513473	-0.214381	0.13006	-0.153968	0.329897	-0.176052	-0.0669549	-0.0143423	-0.20616	-0.0687266	-0.202059	1.24262	0.299831	-0.0525796	-0.102399	1.54485
Glut2	mRNA	Slc2a2	not_specific	astrocyte		brain	DVC					M. Dallaporta, M.S. Bonnet, K. Horner, J. Trouslard, A. Jean, J.D. Troadec, Glial cells of the nucleus tractus solitarius as partners of the dorsal hindbrain regulation of energy balance: a proposal for a working hypothesis, Brain Res. 1350 (2010) 35-42. 10.1016/j.brainres.2010.04.025.	-0.0941247	-0.187098	-0.188388	0.116162	-0.113263	-0.0775047	-0.13954	-0.0984094	-0.113448	0.260897	-0.038875	0.0845828	-0.0600696	0.195225	-0.051895	-0.178885	0.214143	-0.0308249	-0.0270104	0.195209	0.113383	0.123778	-0.0897903	-0.0216832	0.0873654	0.249953	-0.0756144	-0.0818721	0.00129048	-0.148667	0.309327	0.010805	-0.101024	-0.161117	0.239123	0.371144	-0.103649
Hey1	mRNA	Hey1	Mus musculus	endothelial	arterial_endoth	brain	brain					J. Kalucka, L. de Rooij, J. Goveia, K. Rohlenova, S.J. Dumas, E. Meta, et al., Single-Cell Transcriptome Atlas of Murine Endothelial Cells, Cell. 180 (2020) 764-79 e20. 10.1016/j.cell.2020.01.015.	0.291858	0.218836	-0.104505	-0.0122796	-0.101583	0.0186465	-0.0943841	0.317569	-0.108884	0.00157226	-0.11339	-0.00349214	-0.0845851	0.000466901	-0.022027	-0.0953388	-0.0255172	-0.0323248	-0.0187313	0.00908422	0.0138954	-0.0138588	0.0980232	-0.0292771	-0.000604259	-0.0312236	0.19381	-0.00109648	-0.00708577	-0.0125234	-0.0381407	0.00685177	-0.0878578	0.16555	-0.0174936	-0.00929735	-0.0820943
Plpp3	mRNA	Plpp3	Mus musculus	endothelial		brain	brain					J. Kalucka, L. de Rooij, J. Goveia, K. Rohlenova, S.J. Dumas, E. Meta, et al., Single-Cell Transcriptome Atlas of Murine Endothelial Cells, Cell. 180 (2020) 764-79 e20. 10.1016/j.cell.2020.01.015.	1.83266	-0.19001	-0.377272	-0.336588	-0.177049	0.273271	-0.142685	1.8667	-0.211122	-0.341376	-0.269433	-0.361012	-0.386044	-0.360159	-0.393799	-0.362922	-0.338687	-0.354157	-0.331954	-0.27057	-0.295667	-0.35705	0.453235	-0.308035	-0.331282	-0.321279	1.80085	-0.235812	-0.186258	0.228432	-0.29245	-0.340548	0.863521	-0.0845345	-0.130495	-0.388209	-0.323051
Prox1	mRNA	Prox1	Mus musculus	endothelial	lymphatic_endoth	brain_lung_liver_kidney_heart						J. Kalucka, L. de Rooij, J. Goveia, K. Rohlenova, S.J. Dumas, E. Meta, et al., Single-Cell Transcriptome Atlas of Murine Endothelial Cells, Cell. 180 (2020) 764-79 e20. 10.1016/j.cell.2020.01.015.	-0.35122	-0.418532	-0.276992	-0.368011	0.749089	-0.243617	0.618441	-0.382347	0.913039	-0.399644	0.857759	-0.414934	-0.413226	-0.422674	-0.419766	-0.280686	-0.26983	-0.385647	-0.410578	-0.389112	-0.331158	-0.405665	-0.11344	-0.425026	-0.0842662	-0.388233	-0.184122	-0.379967	0.188045	0.513154	-0.264107	-0.404799	-0.359746	-0.367712	-0.421245	-0.42016	-0.409086
Glul	mRNA	Glul	Mus musculus	endothelial	arterial_capillary_endoth	brain_lung_liver_kidney_heart						J. Kalucka, L. de Rooij, J. Goveia, K. Rohlenova, S.J. Dumas, E. Meta, et al., Single-Cell Transcriptome Atlas of Murine Endothelial Cells, Cell. 180 (2020) 764-79 e20. 10.1016/j.cell.2020.01.015.	0.451773	0.020733	-0.0918657	-0.553028	0.709593	-0.224647	0.779035	0.522825	0.875101	-0.570379	0.37386	-0.563389	-0.560888	-0.551642	-0.562362	-0.100417	-0.568962	-0.550123	-0.526584	-0.570191	-0.563851	-0.559835	-0.467715	-0.566789	-0.543442	-0.565576	0.0437184	-0.314414	-0.573532	-0.113374	-0.557018	-0.493681	0.220227	0.0958919	-0.557943	-0.519928	-0.208725
Plvap	mRNA	Plvap	Mus musculus	endothelial		brain	choroid_plexus					J. Kalucka, L. de Rooij, J. Goveia, K. Rohlenova, S.J. Dumas, E. Meta, et al., Single-Cell Transcriptome Atlas of Murine Endothelial Cells, Cell. 180 (2020) 764-79 e20. 10.1016/j.cell.2020.01.015.	-0.20659	-0.142453	-0.201643	0.224738	-0.215008	-0.173687	-0.210127	-0.207478	-0.218572	0.26595	-0.225029	0.193918	0.271997	0.327047	0.18104	-0.190884	0.382116	0.224945	0.258587	0.257677	0.221329	0.194886	-0.228596	0.0466031	0.29817	0.322793	-0.215135	-0.0209612	0.282902	-0.212061	0.254888	0.0791154	-0.118328	-0.120129	0.0899806	0.174712	-0.147764
Rgcc	mRNA	Rgcc	Mus musculus	endothelial	capillary_endoth	brain_lung_liver_kidney_heart						J. Kalucka, L. de Rooij, J. Goveia, K. Rohlenova, S.J. Dumas, E. Meta, et al., Single-Cell Transcriptome Atlas of Murine Endothelial Cells, Cell. 180 (2020) 764-79 e20. 10.1016/j.cell.2020.01.015.	0.271262	1.29195	-0.143769	-0.136419	-0.132407	1.28946	-0.126075	0.31118	-0.138662	-0.140878	-0.145196	-0.145746	-0.14994	-0.136285	-0.152936	-0.144047	-0.146219	-0.139394	-0.137609	-0.136331	-0.149663	-0.138127	3.03367	-0.1265	-0.153266	-0.140307	0.0306293	-0.124506	-0.085697	0.579781	-0.0144974	-0.114055	0.307634	1.02403	-0.118833	-0.15061	0.00359552
Col1a1	mRNA	Col1a1	Mus musculus	fibroblast		brain_lung_liver_kidney_heart						J. Kalucka, L. de Rooij, J. Goveia, K. Rohlenova, S.J. Dumas, E. Meta, et al., Single-Cell Transcriptome Atlas of Murine Endothelial Cells, Cell. 180 (2020) 764-79 e20. 10.1016/j.cell.2020.01.015.	0.438789	-0.079978	-0.0945031	-0.0927577	-0.0898582	0.291803	-0.0895932	0.501741	-0.0934225	-0.0946943	-0.0921457	-0.0939565	-0.0899745	-0.0897103	-0.0870115	-0.0915374	-0.0937244	-0.0952536	-0.0988716	-0.100677	-0.0977987	-0.0999318	-0.0822789	-0.0933695	-0.0951487	-0.0891762	0.0571418	-0.0290989	-0.0964167	-0.0759203	-0.0940409	-0.0856483	2.35463	0.0785	-0.101203	-0.0947231	-0.0513831
Cp	mRNA	Cp	Mus musculus	endothelial	lymphatic_endoth	brain_lung_liver_kidney_heart						J. Kalucka, L. de Rooij, J. Goveia, K. Rohlenova, S.J. Dumas, E. Meta, et al., Single-Cell Transcriptome Atlas of Murine Endothelial Cells, Cell. 180 (2020) 764-79 e20. 10.1016/j.cell.2020.01.015.	-0.127019	1.29584	0.197099	-0.116126	-0.0592333	1.38406	-0.0937808	-0.161718	-0.0346298	-0.104749	-0.0122689	-0.127994	-0.149086	-0.124695	-0.14435	0.166489	-0.102264	-0.134927	-0.129843	-0.12049	-0.109852	-0.0910167	1.18224	-0.0926412	-0.132904	-0.0910059	-0.0127369	-0.0700906	-0.137078	-0.0749549	-0.113046	-0.164473	4.81599	1.33633	-0.092832	-0.0750191	-0.0917763
Fbln5	mRNA	Fbln5	Mus musculus	endothelial	large_arterial_endoth	brain_lung_liver_kidney_heart						J. Kalucka, L. de Rooij, J. Goveia, K. Rohlenova, S.J. Dumas, E. Meta, et al., Single-Cell Transcriptome Atlas of Murine Endothelial Cells, Cell. 180 (2020) 764-79 e20. 10.1016/j.cell.2020.01.015.	0.193472	-0.0333607	-0.132732	0.0197137	-0.125917	0.147342	-0.123254	0.161992	-0.133154	0.0687551	-0.126057	0.0753904	-0.0146443	0.121717	-0.0789295	-0.126367	-0.0492112	-0.0451179	0.0244124	0.0896615	0.0255261	-0.0412155	-0.0980332	-0.117911	0.0571492	0.0605632	0.337629	-0.0694685	-0.00366436	-0.1042	-0.149728	0.0894651	0.787218	0.260176	-0.132048	0.104756	0.443261
CD31	mRNA	Pecam1	Mus musculus	endothelial		brain_lung_liver_kidney_heart						J. Kalucka, L. de Rooij, J. Goveia, K. Rohlenova, S.J. Dumas, E. Meta, et al., Single-Cell Transcriptome Atlas of Murine Endothelial Cells, Cell. 180 (2020) 764-79 e20. 10.1016/j.cell.2020.01.015.	-0.0501838	5.18175	0.243999	-0.0240548	-0.0902981	0.0678482	-0.0935647	-0.0534064	-0.0907381	-0.0425922	-0.0861526	-0.0469598	0.00417847	-0.0398183	-0.0356378	0.248029	-0.0385043	-0.00375176	-0.0194303	-0.062257	0.0178931	-0.0037032	-0.0794508	-0.00838835	-0.0289536	-0.031407	-0.0645036	-0.046334	-0.0183542	-0.108411	-0.00971552	-0.0139098	-0.0208824	4.76151	-0.034695	-0.0177666	-0.0271237
Cdh5	mRNA	Cdh5	Mus musculus	endothelial		brain_lung_liver_kidney_heart						J. Kalucka, L. de Rooij, J. Goveia, K. Rohlenova, S.J. Dumas, E. Meta, et al., Single-Cell Transcriptome Atlas of Murine Endothelial Cells, Cell. 180 (2020) 764-79 e20. 10.1016/j.cell.2020.01.015.	-0.0570082	4.36669	-0.0710798	-0.0641416	-0.0717954	0.339771	-0.0733473	-0.0622798	-0.0742399	-0.0642179	-0.0740659	-0.0629756	-0.0691564	-0.0638436	-0.073925	-0.0661704	-0.0753762	-0.0676685	-0.0610468	-0.0590082	-0.0743979	-0.0688321	-0.0746694	-0.0596947	-0.0459328	-0.0653898	-0.0559809	-0.0402832	-0.0552922	-0.0787149	-0.0787149	-0.0728718	2.43965	3.72275	-0.0665209	-0.0688044	-0.0485391
Acta2	mRNA	Acta2	Mus musculus	mural	smooth_muscle_arterial	brain_lung_liver_kidney_heart						J. Kalucka, L. de Rooij, J. Goveia, K. Rohlenova, S.J. Dumas, E. Meta, et al., Single-Cell Transcriptome Atlas of Murine Endothelial Cells, Cell. 180 (2020) 764-79 e20. 10.1016/j.cell.2020.01.015.	-0.025198	0.121512	-0.04589	-0.0165464	-0.048742	0.139153	-0.0458858	-0.0220545	-0.0533214	-0.0203878	-0.0508365	-0.0173364	-0.00139581	-0.0122744	-0.00448064	-0.0398016	-0.0144805	-0.0133384	-0.0273131	-0.0151185	-0.0307699	-0.0198927	-0.0219231	-0.0212806	0.00600083	-0.0169356	-0.0469312	0.0404502	-0.0307439	-0.0544909	-0.0112195	-0.0279447	-0.0294486	1.0168	-0.0319072	-0.0217993	-0.0394393
Hba_a1	mRNA	Hba-a1	Mus musculus	erytrocyte		brain_lung_liver_kidney_heart						J. Kalucka, L. de Rooij, J. Goveia, K. Rohlenova, S.J. Dumas, E. Meta, et al., Single-Cell Transcriptome Atlas of Murine Endothelial Cells, Cell. 180 (2020) 764-79 e20. 10.1016/j.cell.2020.01.015.	0.0151758	1.06907	0.014404	-0.0443945	0.00402822	0.120628	0.0104806	0.0175292	-0.004185	-0.0609242	0.0014756	-0.0616704	-0.0363174	-0.0543726	-0.0395927	0.00368742	-0.0399506	-0.061714	-0.0673049	-0.0519089	-0.0486552	-0.0387368	-0.0086678	-0.0492955	-0.0236109	-0.0571599	-0.0318038	0.349379	-0.0074186	-0.00355042	-0.0713036	-0.0818468	0.262391	1.07306	-0.0618002	-0.0434576	0.0236352
Hba_a2	mRNA	Hba-a2	Mus musculus	erytrocyte		brain_lung_liver_kidney_heart						J. Kalucka, L. de Rooij, J. Goveia, K. Rohlenova, S.J. Dumas, E. Meta, et al., Single-Cell Transcriptome Atlas of Murine Endothelial Cells, Cell. 180 (2020) 764-79 e20. 10.1016/j.cell.2020.01.015.	0.0109622	0.815552	-0.00712781	-0.0359656	-0.00418519	0.1226	0.00136992	0.00078579	-0.00452569	-0.046745	-0.0190357	-0.0659209	-0.057649	-0.0266516	-0.0449479	-0.00526888	-0.0478248	-0.0580415	-0.0619323	-0.051338	-0.0502551	-0.0291549	0.0180319	-0.0241243	-0.00550815	-0.040501	0.0371298	0.253169	-0.0420622	0.00550329	-0.0151487	0.06455	0.249438	0.854431	0.0173516	0.0171541	0.0151307
Hbb_bs	mRNA	Hbb-bs	Mus musculus	erytrocyte		brain_lung_liver_kidney_heart						J. Kalucka, L. de Rooij, J. Goveia, K. Rohlenova, S.J. Dumas, E. Meta, et al., Single-Cell Transcriptome Atlas of Murine Endothelial Cells, Cell. 180 (2020) 764-79 e20. 10.1016/j.cell.2020.01.015.	0.0295207	1.32396	0.062916	-0.0730175	0.0318096	0.185208	0.0479526	0.0199323	0.0172884	-0.0923571	0.0158311	-0.0984307	-0.0585324	-0.0770129	-0.0791295	0.0427775	-0.0724073	-0.0704706	-0.0727659	-0.101265	-0.101056	-0.0850256	-0.0121432	-0.0503925	0.00404514	-0.10999	0.0570654	0.325627	-0.0744163	-0.03504	-0.1123	-0.0782257	0.417515	1.32958	-0.0383689	-0.0754273	0.0652419
Prss23	mRNA	Prss23	Mus musculus	endothelial	lymphatic_endoth	brain_lung_liver_kidney_heart						J. Kalucka, L. de Rooij, J. Goveia, K. Rohlenova, S.J. Dumas, E. Meta, et al., Single-Cell Transcriptome Atlas of Murine Endothelial Cells, Cell. 180 (2020) 764-79 e20. 10.1016/j.cell.2020.01.015.	-0.0394823	0.802453	-0.0507059	-0.0343609	-0.0478405	0.212133	-0.046401	-0.0397996	-0.0491586	-0.0472685	-0.0485778	-0.0357983	-0.0498769	-0.0307642	-0.0330601	-0.0508721	-0.0394259	-0.0292865	-0.0479435	-0.0501278	-0.0397795	-0.0454063	0.374272	-0.00481371	-0.0119673	-0.0402065	-0.0323261	-0.0550065	-0.0550065	0.0357885	0.145493	-0.0346127	0.0952551	0.87049	-0.0260346	-0.0407643	-0.0399541
Bcam	mRNA	Bcam	Mus musculus	endothelial	blood_vessels_endoth	brain_lung_liver_kidney_heart						J. Kalucka, L. de Rooij, J. Goveia, K. Rohlenova, S.J. Dumas, E. Meta, et al., Single-Cell Transcriptome Atlas of Murine Endothelial Cells, Cell. 180 (2020) 764-79 e20. 10.1016/j.cell.2020.01.015.	-0.0157692	2.7401	-0.100125	-0.00983448	-0.0878313	0.191569	-0.0810205	-0.0195027	-0.0881695	0.00599655	-0.105595	0.0309293	-0.0774678	-0.0835832	0.0787678	-0.0905105	-0.0122972	-0.0573554	-0.0787214	0.0837381	-0.0213487	0.0424042	0.00391486	0.0266835	-0.0806656	-0.0382911	-0.0131636	0.0109479	-0.0429178	-0.106799	-0.100365	-0.0832321	0.0790481	2.58548	-0.0078141	-0.0716907	0.214303
Esam	mRNA	Esam	Mus musculus	endothelial	blood_vessels_endoth	brain_lung_liver_kidney_heart						J. Kalucka, L. de Rooij, J. Goveia, K. Rohlenova, S.J. Dumas, E. Meta, et al., Single-Cell Transcriptome Atlas of Murine Endothelial Cells, Cell. 180 (2020) 764-79 e20. 10.1016/j.cell.2020.01.015.	-0.0715088	5.15547	-0.0916317	-0.0216545	-0.0931542	0.136431	-0.0958557	-0.0704803	-0.0909938	-0.034716	-0.0924295	-0.0376074	-0.0201899	-0.0260908	-0.0127618	-0.0893426	0.0211124	-0.0384235	-0.0207874	-0.0181818	-0.0248382	-0.0158971	-0.0848546	-0.0269822	-0.0346844	0.010077	-0.082615	0.0201501	-0.0281179	-0.0866133	0.0117937	0.0269071	-0.0765737	4.36792	0.00487812	-0.0272245	-0.042886
Ly6c1	mRNA	Ly6c1	Mus musculus	endothelial	blood_vessels_endoth	brain_lung_liver_kidney_heart						J. Kalucka, L. de Rooij, J. Goveia, K. Rohlenova, S.J. Dumas, E. Meta, et al., Single-Cell Transcriptome Atlas of Murine Endothelial Cells, Cell. 180 (2020) 764-79 e20. 10.1016/j.cell.2020.01.015.	-0.0355556	6.4708	-0.0655345	-0.0651861	-0.0656609	0.106678	-0.0631968	-0.0385502	-0.0725976	-0.068426	-0.0648875	-0.0671278	-0.0542943	-0.0725793	-0.0547747	-0.0666874	-0.072898	-0.0576899	-0.0709666	-0.0612392	-0.0673865	-0.0756113	-0.0711229	-0.0693798	-0.0738044	-0.0602231	-0.0371583	0.0074796	-0.0400551	-0.0526284	-0.0680873	-0.0805609	0.010857	5.82658	-0.089205	-0.0828129	0.00459809
Ly6a	mRNA	Ly6a	Mus musculus	endothelial	blood_vessels_endoth	brain_lung_liver_kidney_heart						J. Kalucka, L. de Rooij, J. Goveia, K. Rohlenova, S.J. Dumas, E. Meta, et al., Single-Cell Transcriptome Atlas of Murine Endothelial Cells, Cell. 180 (2020) 764-79 e20. 10.1016/j.cell.2020.01.015.	-0.045688	4.94381	-0.0493861	-0.0577682	-0.0550015	0.0776372	-0.0560704	-0.051488	-0.0560141	-0.0623313	-0.054843	-0.0656418	-0.0542456	-0.0591658	-0.0527146	-0.0504589	-0.059309	-0.0572964	-0.0523662	-0.0641771	-0.053417	-0.0518713	-0.0562709	-0.0629893	-0.0604241	-0.066091	-0.0261	0.0177311	-0.0266526	-0.0688524	-0.0724547	-0.0694142	-0.0645943	4.67743	-0.0458973	-0.0523903	-0.051499
Sox17	mRNA	Sox17	Mus musculus	endothelial	blood_vessels_endoth	brain_lung_liver_kidney_heart						J. Kalucka, L. de Rooij, J. Goveia, K. Rohlenova, S.J. Dumas, E. Meta, et al., Single-Cell Transcriptome Atlas of Murine Endothelial Cells, Cell. 180 (2020) 764-79 e20. 10.1016/j.cell.2020.01.015.	-0.0361852	2.44563	-0.0388187	-0.0403292	-0.0436345	0.0132317	-0.043114	-0.0371986	-0.0439074	-0.0429081	-0.0441567	-0.0347321	-0.0441577	-0.0419742	-0.0451044	-0.0391509	-0.0358064	-0.0311246	-0.0474135	-0.0376635	-0.0382778	-0.0474135	-0.0474135	-0.0474135	-0.0416966	-0.036293	-0.0474135	-0.0282574	-0.0474135	-0.0474135	-0.0474135	-0.0474135	-0.0223888	2.25155	-0.0338908	-0.0474135	-0.0474135
Pglyrp1	mRNA	Pglyrp1	Mus musculus	endothelial		brain	brain					J. Kalucka, L. de Rooij, J. Goveia, K. Rohlenova, S.J. Dumas, E. Meta, et al., Single-Cell Transcriptome Atlas of Murine Endothelial Cells, Cell. 180 (2020) 764-79 e20. 10.1016/j.cell.2020.01.015.	-0.141606	2.8427	-0.194401	0.154895	-0.201816	-0.123529	-0.211641	-0.14884	-0.19892	0.249002	-0.188982	0.23704	-0.00875276	0.11104	0.0951139	-0.179334	0.253573	0.0238044	0.0747443	0.291446	0.140359	0.23936	-0.183313	-0.0556069	0.110862	0.313008	-0.10577	0.0739137	0.109251	-0.137761	0.279454	0.0146168	-0.152852	2.25309	0.122745	0.0567006	-0.154676
Foxq1	mRNA	Foxq1	Mus musculus	endothelial		brain	brain					J. Kalucka, L. de Rooij, J. Goveia, K. Rohlenova, S.J. Dumas, E. Meta, et al., Single-Cell Transcriptome Atlas of Murine Endothelial Cells, Cell. 180 (2020) 764-79 e20. 10.1016/j.cell.2020.01.015.	-0.0373281	1.38082	-0.0416647	-0.028148	-0.0391468	0.024996	-0.0392092	-0.037581	-0.0393286	-0.034178	-0.0400372	-0.0314826	-0.0324076	-0.0396996	-0.0357971	-0.0416647	-0.0185227	-0.0331113	-0.0294415	-0.0319202	-0.0231549	-0.0361654	-0.0360642	-0.0252794	-0.0280581	-0.0230123	-0.0416647	-0.0416647	-0.0416647	-0.0416647	-0.0367868	0.0685364	0.0958924	1.2932	0.112411	-0.0416647	-0.0266322
Cytl1	mRNA	Cytl1	Mus musculus	endothelial	large_arterial_endoth	brain_lung_liver_kidney_heart						J. Kalucka, L. de Rooij, J. Goveia, K. Rohlenova, S.J. Dumas, E. Meta, et al., Single-Cell Transcriptome Atlas of Murine Endothelial Cells, Cell. 180 (2020) 764-79 e20. 10.1016/j.cell.2020.01.015.	-0.015983	0.0649409	-0.0177135	-0.0154139	-0.0167715	0.0167116	-0.0158763	-0.016695	-0.0177135	-0.0130828	-0.0177135	-0.0177135	-0.0177135	-0.0142145	-0.0177135	-0.0177135	-0.0177135	-0.0136603	-0.0177135	-0.0177135	-0.0177135	-0.0122274	-0.0121264	-0.0177135	-0.0177135	-0.0177135	-0.0177135	0.00138605	-0.0177135	-0.0177135	-0.0177135	-0.00953891	-0.0177135	0.234622	-0.0177135	-0.0177135	-0.0177135
Car4	mRNA	Car4	Mus musculus	endothelial	venous_capillary_endoth	brain_lung_liver_kidney_heart						J. Kalucka, L. de Rooij, J. Goveia, K. Rohlenova, S.J. Dumas, E. Meta, et al., Single-Cell Transcriptome Atlas of Murine Endothelial Cells, Cell. 180 (2020) 764-79 e20. 10.1016/j.cell.2020.01.015.	-0.0635432	4.90407	-0.0693767	-0.0524488	-0.0694321	0.18842	-0.0683505	-0.0657671	-0.0765455	-0.074129	-0.0659794	-0.0651713	-0.0690926	-0.0581773	-0.0559932	-0.0635036	-0.0723028	-0.0575127	-0.0608084	-0.0738197	-0.048349	-0.0658178	-0.0594163	-0.0378605	-0.0735595	-0.0626907	-0.0628415	-0.0372851	-0.00827201	-0.0780992	0.01696	-0.0699844	-0.0215014	3.96632	-0.0691248	-0.0432591	-0.0608691
Thy1	mRNA	Thy1	Mus musculus	endothelial	lymphatic_endoth	brain_lung_liver_kidney_heart		fibroblast				J. Kalucka, L. de Rooij, J. Goveia, K. Rohlenova, S.J. Dumas, E. Meta, et al., Single-Cell Transcriptome Atlas of Murine Endothelial Cells, Cell. 180 (2020) 764-79 e20. 10.1016/j.cell.2020.01.015.	-0.208003	-0.301855	-0.145892	0.227274	-0.216971	-0.181829	-0.1866	-0.211803	-0.238229	0.344582	-0.260119	0.341202	-0.103288	0.563286	0.110797	-0.127662	0.126711	0.0277017	0.21158	0.0899034	0.309449	0.419828	-0.246084	-0.128368	-0.106304	0.261638	-0.16179	0.214086	-0.0813277	-0.258521	0.367698	0.451888	-0.209898	-0.210627	0.582286	0.5052	-0.296619
Tgfb2	mRNA	Tgfb2	Mus musculus	endothelial	arterial_capillary_endoth	brain	brain					J. Kalucka, L. de Rooij, J. Goveia, K. Rohlenova, S.J. Dumas, E. Meta, et al., Single-Cell Transcriptome Atlas of Murine Endothelial Cells, Cell. 180 (2020) 764-79 e20. 10.1016/j.cell.2020.01.015.	0.510736	1.45844	-0.203216	-0.039193	-0.182635	0.248722	-0.196703	0.330954	-0.199001	-0.099548	-0.124352	-0.0808146	-0.0488455	-0.0279041	-0.0603919	-0.195822	-1.10707e-05	-0.0897285	-0.0607061	-0.0854109	-0.125073	-0.0471867	-0.0932554	-0.161604	-0.15208	0.0374256	1.19078	-0.101814	-0.064069	-0.209171	-0.117493	1.08337	-0.0902379	1.2854	0.0412175	0.00305998	1.57287
CD36	mRNA	Cd36	Mus musculus	endothelial	blood_vessels_endoth	brain_lung_liver_kidney_heart						J. Kalucka, L. de Rooij, J. Goveia, K. Rohlenova, S.J. Dumas, E. Meta, et al., Single-Cell Transcriptome Atlas of Murine Endothelial Cells, Cell. 180 (2020) 764-79 e20. 10.1016/j.cell.2020.01.015.	-0.0362239	-0.0326604	0.00663354	-0.0168136	-0.0436206	0.0979783	-0.0437144	-0.0400482	-0.0469055	-0.00544728	-0.0397129	-0.0248132	-0.034957	-0.0181863	0.0201686	-0.0285829	-0.000433766	-0.029382	-0.0235449	-0.00142956	-0.0216696	-0.0197995	-0.0380339	0.00381317	-0.0251784	0.00582836	-0.0265759	0.00823564	-0.0492433	-0.0492433	-0.0330487	-0.0279526	-0.0492433	-0.0239304	-0.0357181	-0.0492433	-0.0492433
Nrp1	mRNA	Nrp1	Mus musculus	endothelial	blood_vessels_endoth	brain_lung_liver_kidney_heart						J. Kalucka, L. de Rooij, J. Goveia, K. Rohlenova, S.J. Dumas, E. Meta, et al., Single-Cell Transcriptome Atlas of Murine Endothelial Cells, Cell. 180 (2020) 764-79 e20. 10.1016/j.cell.2020.01.015.	0.0957613	1.34451	0.746923	0.178684	-0.409045	0.152389	-0.410031	0.123823	-0.414714	0.0622031	-0.410861	-0.042158	-0.306264	1.01255	0.399774	0.684669	-0.0717632	0.150863	0.303782	-0.0790161	0.203134	0.454907	-0.318605	0.225963	-0.124633	-0.334098	-0.075406	-0.163996	0.00260334	-0.39546	-0.303283	2.36681	1.15117	1.17455	0.321735	0.802175	-0.0157534
Nrp2	mRNA	Nrp2	Mus musculus	endothelial	lymphatic_endoth	brain_lung_liver_kidney_heart						J. Kalucka, L. de Rooij, J. Goveia, K. Rohlenova, S.J. Dumas, E. Meta, et al., Single-Cell Transcriptome Atlas of Murine Endothelial Cells, Cell. 180 (2020) 764-79 e20. 10.1016/j.cell.2020.01.015.	-0.410193	0.188673	-0.0812302	0.334842	-0.345059	-0.0300543	-0.368185	-0.47893	-0.320064	0.22475	-0.310048	0.64503	1.05507	-0.220609	1.05099	-0.0618445	-0.0124082	0.445996	0.282782	0.0389175	0.435551	0.0152964	-0.0435392	0.784092	0.603095	0.0226542	-0.187094	-0.0820709	0.359728	-0.445755	-0.109366	-0.409229	0.268003	0.155267	-0.529549	-0.384972	-0.295089
Fxyd6	mRNA	Fxyd6	Mus musculus	endothelial	lymphatic_endoth	brain_lung_liver_kidney_heart						J. Kalucka, L. de Rooij, J. Goveia, K. Rohlenova, S.J. Dumas, E. Meta, et al., Single-Cell Transcriptome Atlas of Murine Endothelial Cells, Cell. 180 (2020) 764-79 e20. 10.1016/j.cell.2020.01.015.	-0.204246	-0.138579	-0.172387	0.184296	-0.182924	-0.0214236	-0.164811	-0.213501	-0.203967	-0.0386898	-0.194505	0.131753	0.720134	-0.159643	0.461183	-0.165551	0.0934369	0.622657	0.171068	0.205263	0.147297	0.016526	0.0905558	0.5668	0.625288	0.00847031	-0.142043	0.12988	0.73233	-0.227482	-0.249615	-0.227659	0.0973654	-0.118902	-0.236777	-0.256591	-0.185536
Plpp1	mRNA	Plpp1	Mus musculus	endothelial		brain	brain					J. Kalucka, L. de Rooij, J. Goveia, K. Rohlenova, S.J. Dumas, E. Meta, et al., Single-Cell Transcriptome Atlas of Murine Endothelial Cells, Cell. 180 (2020) 764-79 e20. 10.1016/j.cell.2020.01.015.	-0.154899	0.25545	0.19064	0.214688	-0.282994	-0.00666229	-0.311921	-0.158997	-0.293913	0.246125	-0.194838	0.277703	0.144264	0.206047	0.150214	0.212716	0.179877	0.219729	0.2028	0.131577	0.268194	0.134841	-0.136339	0.128578	0.137312	0.330465	-0.186306	-0.0727493	0.164407	-0.29609	0.531154	0.30484	-0.0334944	0.227804	0.0171931	0.402732	0.505604
Slc12a2	mRNA	Slc12a2	Mus musculus	epithelial		brain	choroid_plexus					N. Dani, R.H. Herbst, C. McCabe, G.S. Green, K. Kaiser, J.P. Head, et al., A cellular and spatial map of the choroid plexus across brain ventricles and ages, Cell. 184 (2021) 3056-74 e21. 10.1016/j.cell.2021.04.003.	-0.610516	-0.486384	-0.291239	-0.47353	0.978515	-0.09914	0.878863	-0.619093	1.09564	-0.436951	1.06585	-0.484827	-0.528657	-0.452114	-0.533328	-0.292202	-0.444288	-0.48588	-0.457072	-0.473935	-0.487727	-0.524703	-0.383474	-0.550379	-0.516212	-0.434477	-0.613681	-0.465725	-0.464085	0.797061	-0.477588	-0.515715	-0.352845	-0.433476	-0.551579	-0.433673	0.976484
Adam12	mRNA	Adam12	Mus musculus	mural		brain	choroid_plexus					N. Dani, R.H. Herbst, C. McCabe, G.S. Green, K. Kaiser, J.P. Head, et al., A cellular and spatial map of the choroid plexus across brain ventricles and ages, Cell. 184 (2021) 3056-74 e21. 10.1016/j.cell.2021.04.003.	-0.186165	-0.246583	-0.235077	-0.0268671	-0.126518	1.47759	-0.152885	-0.187666	-0.126367	-0.108461	-0.0894023	-0.132641	-0.185885	-0.137726	-0.000846003	-0.223311	-0.0991449	0.21324	0.0952512	-0.137805	-0.0712826	0.0891541	3.24242	0.0874613	-0.233442	-0.201876	-0.222183	-0.146616	0.0319329	0.344444	-0.231403	0.417296	2.84998	-0.213461	-0.179441	-0.189268	-0.183955
Igf1r	mRNA	Igf1r	Mus musculus	epithelial		brain	choroid_plexus	endothelial				N. Dani, R.H. Herbst, C. McCabe, G.S. Green, K. Kaiser, J.P. Head, et al., A cellular and spatial map of the choroid plexus across brain ventricles and ages, Cell. 184 (2021) 3056-74 e21. 10.1016/j.cell.2021.04.003.	-0.00519119	2.27543	-0.25631	-0.0491244	0.0341823	0.0971639	-0.0515802	-0.0260826	0.134068	0.107408	0.173029	0.0930039	-0.264356	-0.126004	-0.297831	-0.249405	0.126639	-0.129484	-0.139657	0.033179	-0.0308455	-0.225267	0.048853	-0.333959	0.275048	0.0538548	0.0978684	-0.549086	0.167179	-0.413457	-0.0820527	-0.374029	0.168222	1.89082	-0.110539	-0.0658487	0.629014
Htr2c	mRNA	Htr2c	Mus musculus	epithelial		brain	choroid_plexus	mural				N. Dani, R.H. Herbst, C. McCabe, G.S. Green, K. Kaiser, J.P. Head, et al., A cellular and spatial map of the choroid plexus across brain ventricles and ages, Cell. 184 (2021) 3056-74 e21. 10.1016/j.cell.2021.04.003.	-0.553958	-0.543675	-0.548095	0.543321	-0.551807	-0.060054	-0.540223	-0.558135	-0.5589	0.991967	-0.570663	0.892315	0.174966	0.444929	0.658384	-0.51502	0.598532	0.366191	0.504216	0.762919	0.897507	0.686183	-0.56093	-0.398158	0.401957	0.598935	-0.554391	0.027831	0.512624	-0.599088	0.0928876	-0.465389	-0.53874	-0.501887	-0.201618	-0.410646	3.25513
Enpp2	mRNA	Enpp2	Mus musculus	epithelial		brain	choroid_plexus	mural				N. Dani, R.H. Herbst, C. McCabe, G.S. Green, K. Kaiser, J.P. Head, et al., A cellular and spatial map of the choroid plexus across brain ventricles and ages, Cell. 184 (2021) 3056-74 e21. 10.1016/j.cell.2021.04.003.	-0.669535	-0.447233	-0.699411	-0.578213	1.14525	0.135355	1.11376	-0.705955	1.21984	-0.573965	1.13291	-0.595976	-0.705281	-0.220678	-0.569293	-0.696257	-0.658709	-0.60281	-0.454361	-0.697336	-0.536359	-0.658255	-0.0593869	-0.598786	-0.675381	-0.669937	-0.577247	-0.55651	-0.60713	0.846279	-0.678578	-0.507365	-0.36372	-0.393014	-0.685167	-0.580305	2.78976
Krt18	mRNA	Krt18	Mus musculus	epithelial		brain	choroid_plexus					N. Dani, R.H. Herbst, C. McCabe, G.S. Green, K. Kaiser, J.P. Head, et al., A cellular and spatial map of the choroid plexus across brain ventricles and ages, Cell. 184 (2021) 3056-74 e21. 10.1016/j.cell.2021.04.003.	-0.0319073	-0.0440525	-0.0440525	-0.0335193	-0.0402747	0.209181	-0.0397544	-0.0358832	-0.0405475	-0.0402537	-0.0424246	-0.0410571	-0.0407977	-0.033946	-0.038518	-0.0399225	-0.0327417	-0.035497	-0.0246131	-0.0440525	-0.0343158	-0.0385519	-0.0440525	-0.0440525	0.0565835	-0.0288533	-0.0365005	-0.00575292	0.000312779	-0.0440525	-0.0356398	-0.0440525	-0.0440525	-0.0440525	-0.0440525	-0.0440525	2.10772
Kcnj13	mRNA	Kcnj13	Mus musculus	epithelial		brain	choroid_plexus					N. Dani, R.H. Herbst, C. McCabe, G.S. Green, K. Kaiser, J.P. Head, et al., A cellular and spatial map of the choroid plexus across brain ventricles and ages, Cell. 184 (2021) 3056-74 e21. 10.1016/j.cell.2021.04.003.	-0.0979419	-0.164491	-0.121838	0.0486641	-0.0660273	0.234835	-0.0898673	-0.0978877	-0.0488888	0.0840148	-0.0393214	0.077055	-0.00768716	0.0315182	0.00899521	-0.113247	0.0587603	0.0315319	-0.0101538	0.0304936	0.044004	0.027725	-0.10714	0.0769216	-0.0112063	0.0724256	-0.131446	-0.106193	0.0585223	0.0294628	0.160935	-0.0342201	-0.00451762	-0.16808	0.123673	0.0396478	2.6396
Slc4a5	mRNA	Slc4a5	Mus musculus	epithelial		brain	choroid_plexus					N. Dani, R.H. Herbst, C. McCabe, G.S. Green, K. Kaiser, J.P. Head, et al., A cellular and spatial map of the choroid plexus across brain ventricles and ages, Cell. 184 (2021) 3056-74 e21. 10.1016/j.cell.2021.04.003.	0.086278	-0.0802639	-0.0957503	-0.0815452	-0.0638513	0.790527	-0.0733312	0.099253	-0.0637131	-0.0865528	-0.0498375	-0.0820692	-0.0832916	-0.0822029	-0.087662	-0.0962021	-0.089347	-0.0882389	-0.0961074	-0.0802628	-0.09094	-0.0942217	-0.0965026	-0.0943283	-0.0795197	-0.0737827	-0.0766956	-0.0306376	-0.0773758	-0.0720346	-0.0641572	-0.0845162	-0.0839851	-0.0528775	-0.0727911	-0.0871299	7.52685
Kcnj3	mRNA	Kcnj3	Mus musculus	epithelial		brain	choroid_plexus					N. Dani, R.H. Herbst, C. McCabe, G.S. Green, K. Kaiser, J.P. Head, et al., A cellular and spatial map of the choroid plexus across brain ventricles and ages, Cell. 184 (2021) 3056-74 e21. 10.1016/j.cell.2021.04.003.	-0.36942	-0.722587	-0.70233	0.644422	-0.713212	-0.304026	-0.703004	-0.529376	-0.719096	0.697695	-0.73021	0.664237	0.254764	0.87709	0.680461	-0.66665	0.611407	0.657221	0.755542	0.487763	0.714697	0.723918	0.0436131	0.432476	0.451145	0.696022	0.827842	-0.167256	0.607475	-0.426676	0.864564	0.94058	-0.684487	-0.650623	0.469569	1.2968	-0.709749
Tau	mRNA	Mapt	Rattus rattus	neuron		brain	cortex					B. Ray, J.A. Bailey, S. Sarkar, D.K. Lahiri, Molecular and immunocytochemical characterization of primary neuronal cultures from adult rat brain: Differential expression of neuronal and glial protein markers, J Neurosci Methods. 184 (2009) 294-302. 10.1016/j.jneumeth.2009.08.018.	-0.988818	-1.34135	-1.41545	-0.180122	0.892131	-0.775144	1.0531	-0.991086	0.961106	-0.200464	0.342877	-0.125516	-0.218218	-0.293687	-0.0894753	-1.37781	-0.235083	-0.196055	-0.152404	-0.160888	-0.136291	-0.118476	-0.411521	-0.0326449	-0.310055	-0.177726	-0.990675	-0.711629	-0.181107	1.0137	-0.149725	-0.269783	-1.28285	-1.22467	-0.193931	-0.241099	-1.33193
NSE	protein	Eno2	Rattus rattus	neuron		brain	cortex					B. Ray, J.A. Bailey, S. Sarkar, D.K. Lahiri, Molecular and immunocytochemical characterization of primary neuronal cultures from adult rat brain: Differential expression of neuronal and glial protein markers, J Neurosci Methods. 184 (2009) 294-302. 10.1016/j.jneumeth.2009.08.018.	-0.356709	-0.348268	-0.349332	0.383503	-0.379351	-0.192502	-0.354587	-0.366414	-0.390587	0.490312	-0.421955	0.51196	0.233413	0.438731	0.282374	-0.331677	0.324587	0.306915	0.201488	0.309867	0.449094	0.432236	-0.304738	0.258977	0.0846082	0.324248	-0.312693	0.234323	0.279217	-0.434533	0.555609	0.324075	-0.174396	-0.25238	0.724077	0.52697	0.144365
CCK	mRNA	Cck	non_specific	neuron	gabaergic_neuron	brain	brain			yes		S.E. Lauri, M. Ryazantseva, E. Orav, A. Vesikansa, T. Taira, Kainate receptors in the developing neuronal networks, Neuropharmacology. 195 (2021) 108585. 10.1016/j.neuropharm.2021.108585.	-0.0831193	-0.0918984	0.043274	0.0449293	-0.0317359	-0.0410987	-0.0113181	-0.0834086	-0.0447187	-0.112254	-0.0627885	-0.0138745	-0.0999732	-0.119122	0.19741	0.0420035	0.100552	-0.0148249	0.136187	0.128123	0.277707	0.182633	-0.0548687	0.10943	-0.113411	-0.116608	-0.0658589	0.158179	-0.119233	-0.0741862	-0.143736	0.977286	-0.0576791	-0.0851924	1.38657	-0.149529	-0.0490406
Somatostatin	mRNA	Sst	non_specific	oligodendrocyte	postmitotic_OL	brain	brain					Y.H. Song, J. Yoon, S.H. Lee, The role of neuropeptide somatostatin in the brain and its application in treating neurological disorders, Exp Mol Med. 53 (2021) 328-38. 10.1038/s12276-021-00580-4.	-0.12086	0.0550312	0.105012	0.0352425	-0.00916571	-0.049041	0.0228845	-0.117741	-0.0123652	-0.116549	-0.0741575	0.042746	-0.0645682	0.230539	0.100101	0.102719	-0.165326	0.381325	0.325189	0.0756368	-0.0247659	-0.0783127	-0.0328899	-0.201293	0.276551	0.0272531	-0.116697	0.137531	-0.0652026	-0.138372	-0.122018	0.0535588	-0.0284639	0.0388374	0.816028	-0.0602345	-0.135387
A2m	mRNa	A2m	Mus musculus	endothelial		brain	brain				microvessels	H.W. Song, K.L. Foreman, B.D. Gastfriend, J.S. Kuo, S.P. Palecek, E.V. Shusta, Transcriptomic comparison of human and mouse brain microvessels, Sci Rep. 10 (2020) 12358. 10.1038/s41598-020-69096-7.	0.931485	-0.11893	-0.142062	-0.130388	-0.147494	0.0907281	-0.146566	0.498898	-0.148706	-0.14807	-0.149577	-0.0916199	-0.081252	-0.157631	-0.13912	-0.139303	-0.158032	-0.151742	-0.135177	-0.148811	-0.0706022	-0.148356	-0.148161	-0.143439	-0.145701	-0.122532	4.00692	-0.0162692	-0.156861	-0.158609	-0.145297	-0.136954	0.249688	-0.092513	-0.155486	-0.15945	0.822758
PTPRB	mRNa	Ptprb	Mus musculus	endothelial		brain	brain				microvessels	H.W. Song, K.L. Foreman, B.D. Gastfriend, J.S. Kuo, S.P. Palecek, E.V. Shusta, Transcriptomic comparison of human and mouse brain microvessels, Sci Rep. 10 (2020) 12358. 10.1038/s41598-020-69096-7.	-0.101675	7.51143	-0.104013	-0.0269436	-0.106051	0.132581	-0.117594	-0.105675	-0.113339	-0.0171417	-0.0711005	-0.0100747	-0.00673304	-0.0440229	-0.0176389	-0.0937474	-0.0575708	-0.0355615	-0.039476	-0.0554567	-0.0376634	-0.051118	-0.0292246	0.0695168	-0.101426	-0.0839284	-0.114397	-0.0405313	-0.0492499	0.113309	-0.0831011	-0.0262958	-0.0829496	6.82578	-0.0162359	-0.0467357	-0.091871
Adgra2	mRNa	Adgra2	Mus musculus	mural	pericyte	brain	brain				microvessels	H.W. Song, K.L. Foreman, B.D. Gastfriend, J.S. Kuo, S.P. Palecek, E.V. Shusta, Transcriptomic comparison of human and mouse brain microvessels, Sci Rep. 10 (2020) 12358. 10.1038/s41598-020-69096-7.	-0.0930735	1.98403	-0.195962	0.082845	-0.164875	0.284206	-0.170545	-0.125793	-0.164835	0.0893076	-0.156049	0.12053	0.0601176	0.129551	0.00280389	-0.18715	0.0653339	0.0999783	0.100172	0.0837983	0.141123	0.0820177	0.0149084	-0.0467262	0.153028	0.168573	-0.117877	-0.0115573	0.0254619	-0.115591	0.00552433	-0.0185466	1.42721	1.71002	0.0437818	0.15024	-0.113178
NOTCH3	mRNa	Notch3	Mus musculus	mural	pericyte	brain	brain	ependymal			microvessels	H.W. Song, K.L. Foreman, B.D. Gastfriend, J.S. Kuo, S.P. Palecek, E.V. Shusta, Transcriptomic comparison of human and mouse brain microvessels, Sci Rep. 10 (2020) 12358. 10.1038/s41598-020-69096-7.	0.423307	0.28388	-0.31769	0.104388	-0.325196	0.190818	-0.327269	0.445858	-0.32685	0.167197	-0.324761	0.156734	-0.0173526	0.0437864	0.0624034	-0.302741	0.165301	0.079596	0.175778	0.163667	0.216339	0.173569	-0.328735	0.0351472	-0.0579441	0.281078	0.339895	-0.140084	-0.0644049	-0.325552	0.0724124	-0.0377585	-0.179722	0.435716	-0.030487	0.119438	0.0157403
Raldh2	mRNA	Aldh1a2	non_specific	mural	fibroblast-like	brain	brain					L. Xu, Y. Yao, Central Nervous System Fibroblast-Like Cells in Stroke and Other Neurological Disorders, Stroke. 52 (2021) 2456-64. 10.1161/STROKEAHA.120.033431.	0.0667176	-0.0491686	-0.07484	-0.0367363	-0.0725257	0.357554	-0.0724332	-0.0710805	-0.0761303	-0.0711039	-0.0691146	-0.0508144	-0.0704486	-0.0710518	-0.0713326	-0.0751339	-0.0662734	-0.0755985	-0.0604598	-0.0723327	0.607698	0.0051483	-0.0634752	-0.0729927	-0.0703517	-0.0780173	0.182101	-0.0562401	-0.0768186	-0.0669617	-0.0711261	-0.0570043	2.23082	-0.0016895	-0.0739206	-0.0530661	-0.0383936
Fibronectin	mRNA	Fn1	non_specific	mural	fibroblast-like	brain	brain					L. Xu, Y. Yao, Central Nervous System Fibroblast-Like Cells in Stroke and Other Neurological Disorders, Stroke. 52 (2021) 2456-64. 10.1161/STROKEAHA.120.033431.	0.047976	5.35711	-0.0784017	-0.0627014	-0.0900644	0.261866	-0.0939359	-0.0827475	-0.090421	-0.0754564	-0.0896363	-0.0933496	-0.0834066	-0.0535032	-0.0920864	-0.0763485	-0.0940102	-0.0762998	-0.0455651	-0.0923326	-0.104743	-0.0497438	-0.0260413	-0.0840956	-0.0912969	-0.0725251	-0.0613443	0.00456323	-0.0613511	-0.0747907	-0.0891309	-0.0482558	0.619564	4.74834	-0.0954548	-0.0828159	-0.0978378
CHT	mRNA	Slc5a7	non_specific	neuron	preganglionic	brain	brainstem	cholinergic		yes		U. Ernsberger, H. Rohrer, Sympathetic tales: subdivisons of the autonomic nervous system and the impact of developmental studies, Neural Dev. 13 (2018) 20. 10.1186/s13064-018-0117-6.	-0.110847	0.0321528	-0.0823407	0.0917658	-0.111031	0.0905384	-0.112699	-0.115348	-0.10757	-0.0650126	-0.107671	0.1601	0.170167	-0.123518	0.0217347	-0.0731636	0.0658266	-0.0646844	0.0328954	0.310684	0.271376	0.15685	0.219842	-0.0343698	0.0848554	0.0375392	-0.0789684	0.0983347	0.159139	0.159963	-0.123959	-0.122142	-0.11833	0.0285491	-0.14714	-0.117172	-0.10283
Beta_catenin	mRNA	Ctnnb1	Mus musculus	ependymal		brain	lateral_ventricle					C.R. Gajera, H. Emich, O. Lioubinski, A. Christ, R. Beckervordersandforth-Bonk, K. Yoshikawa, et al., LRP2 in ependymal cells regulates BMP signaling in the adult neurogenic niche, J Cell Sci. 123 (2010) 1922-30. 10.1242/jcs.065912.	0.0757423	1.5874	0.040954	0.00857583	-0.109553	0.208147	-0.104525	0.0893405	-0.1094	-0.0173799	-0.114287	-0.0188295	0.133796	-0.0113576	0.0134017	0.0475088	-0.0470662	0.140224	0.130104	-0.0119046	-0.00503709	-0.014012	0.200656	0.0635924	-0.0771836	-0.0523674	-0.0260098	-0.0448959	-0.0470777	-0.0737097	-0.0608284	0.0915907	0.336027	1.47769	-0.0985149	-0.00707027	0.141421
Lrp2	mRNA	Lrp2	Mus musculus	ependymal		brain	lateral_ventricle					C.R. Gajera, H. Emich, O. Lioubinski, A. Christ, R. Beckervordersandforth-Bonk, K. Yoshikawa, et al., LRP2 in ependymal cells regulates BMP signaling in the adult neurogenic niche, J Cell Sci. 123 (2010) 1922-30. 10.1242/jcs.065912.	-0.0669943	-0.0868335	-0.0695763	0.0177131	-0.0801773	0.217317	-0.0825778	-0.0706592	-0.080967	0.111728	-0.0797855	-0.0111465	0.0127524	-0.0153625	-0.0365725	-0.0694046	0.0703427	0.15256	-0.0650349	0.0277334	-0.0311561	-0.0104951	-0.0613066	-0.0488918	-0.0016502	0.0187064	-0.048913	-0.0204115	0.0445928	-0.0767868	-0.0234323	-0.0519463	-0.074272	-0.0741296	-0.0808534	-0.0637499	-0.0192969
CD24	mRNA	Cd24a	Mus musculus	ependymal		brain	lateral_ventricle					C.R. Gajera, H. Emich, O. Lioubinski, A. Christ, R. Beckervordersandforth-Bonk, K. Yoshikawa, et al., LRP2 in ependymal cells regulates BMP signaling in the adult neurogenic niche, J Cell Sci. 123 (2010) 1922-30. 10.1242/jcs.065912.	-0.0237235	0.0884548	-0.0304312	-0.0169231	-0.0410403	0.122875	-0.0361654	-0.0245715	-0.0497122	-0.0411424	-0.0447179	-0.0332126	-0.0285313	-0.0495954	-0.030602	-0.031374	0.0707323	0.0729614	-0.0260978	-0.0130623	-0.0624006	-0.0493066	0.0325456	0.203793	-0.0712097	-0.0549588	-0.0294562	0.0158813	-0.0778463	-0.0608629	-0.0666459	-0.0560553	0.00613013	0.105762	-0.0672756	-0.00905415	-0.00263257
gamma_tubulin	mRNA	Tubg1	Mus musculus	ependymal		brain	lateral_ventricle					C.R. Gajera, H. Emich, O. Lioubinski, A. Christ, R. Beckervordersandforth-Bonk, K. Yoshikawa, et al., LRP2 in ependymal cells regulates BMP signaling in the adult neurogenic niche, J Cell Sci. 123 (2010) 1922-30. 10.1242/jcs.065912.	-0.0184991	0.0259295	-0.0622499	0.0439371	-0.0510499	-0.0287036	-0.0444611	-0.0149353	-0.0549893	0.090299	-0.0636202	0.05799	-0.00386911	0.0631713	-0.0201121	-0.0622413	0.0468422	-0.00911076	0.0167958	0.0691522	0.0340449	0.0696867	-0.0488588	-0.00189001	0.0109256	0.0659026	-0.0237954	-0.0802098	0.0292899	-0.0159254	0.118488	0.0528581	-0.0302765	0.0561199	0.0374379	0.0234866	0.025785
Lrcc1	mRNA	Lrrcc1	Mus musculus	ependymal		brain	forebrain					A. MacDonald, B. Lu, M. Caron, N. Caporicci-Dinucci, D. Hatrock, K. Petrecca, et al., Single Cell Transcriptomics of Ependymal Cells Across Age, Region and Species Reveals Cilia-Related and Metal Ion Regulatory Roles as Major Conserved Ependymal Cell Functions, Front Cell Neurosci. 15 (2021) 703951. 10.3389/fncel.2021.703951.	-0.291025	-0.239627	-0.207611	0.285539	-0.272944	-0.169254	-0.318012	-0.298892	-0.245525	0.477052	-0.19307	0.435333	0.137945	0.287215	0.169307	-0.192893	0.320236	0.234353	0.209467	0.347016	0.323167	0.254998	-0.00966648	0.0621471	0.124131	0.34611	-0.249034	-0.18271	0.183937	-0.252002	0.184701	0.00666758	-0.297711	-0.252701	0.204059	0.276613	-0.18445
Pltp	mRNA	Pltp	Mus musculus	ependymal		brain	forebrain					A. MacDonald, B. Lu, M. Caron, N. Caporicci-Dinucci, D. Hatrock, K. Petrecca, et al., Single Cell Transcriptomics of Ependymal Cells Across Age, Region and Species Reveals Cilia-Related and Metal Ion Regulatory Roles as Major Conserved Ependymal Cell Functions, Front Cell Neurosci. 15 (2021) 703951. 10.3389/fncel.2021.703951.	0.137011	7.08926	-0.0869136	-0.11759	-0.112974	0.608915	-0.112918	0.0832237	-0.114511	-0.126106	-0.12267	-0.12027	-0.118255	-0.118361	-0.117781	-0.0860428	-0.0999714	-0.125978	-0.113633	-0.12755	-0.131412	-0.126468	-0.115032	-0.132603	-0.106086	-0.114269	0.50367	0.0160706	-0.101444	-0.135086	-0.124824	-0.128137	1.18816	6.19224	-0.125158	-0.123214	0.792253
Foxj1	mRNA	Foxj1	Mus musculus	ependymal		brain	forebrain	epithelial			ventricular_lining	A. MacDonald, B. Lu, M. Caron, N. Caporicci-Dinucci, D. Hatrock, K. Petrecca, et al., Single Cell Transcriptomics of Ependymal Cells Across Age, Region and Species Reveals Cilia-Related and Metal Ion Regulatory Roles as Major Conserved Ependymal Cell Functions, Front Cell Neurosci. 15 (2021) 703951. 10.3389/fncel.2021.703951.	-0.0250708	-0.108839	-0.101637	-0.0455837	0.0243327	0.257806	0.0408426	-0.0449194	0.0351712	0.0442197	-0.0615923	-0.03747	-0.106078	-0.0591127	-0.109923	-0.100344	-0.0423188	-0.0946815	-0.0950935	-0.0490332	-0.0664101	-0.0805058	-0.0765904	-0.0680688	-0.0975641	-0.0555208	0.0631078	-0.00222175	-0.0821044	0.140588	-0.0200874	-0.0925788	-0.103453	-0.0884273	0.0231197	-0.0463969	0.912691
Pifo	mRNA	Pifo	Mus musculus	ependymal		brain	forebrain					A. MacDonald, B. Lu, M. Caron, N. Caporicci-Dinucci, D. Hatrock, K. Petrecca, et al., Single Cell Transcriptomics of Ependymal Cells Across Age, Region and Species Reveals Cilia-Related and Metal Ion Regulatory Roles as Major Conserved Ependymal Cell Functions, Front Cell Neurosci. 15 (2021) 703951. 10.3389/fncel.2021.703951.	-0.111397	-0.127506	-0.109354	0.0503369	-0.15051	0.686421	-0.153699	-0.142363	-0.147131	-0.10333	-0.156384	-0.0412199	0.146761	-0.11696	0.41925	-0.106454	-0.0185779	0.0863401	0.202465	-0.0856036	0.133289	0.0550809	-0.153379	1.09283	-0.100406	-0.0628386	0.0222386	-0.0520452	0.00618485	-0.153502	-0.140543	-0.143808	-0.163385	-0.144382	-0.153379	-0.151162	3.54054
Meig1	mRNA	Meig1	Mus musculus	ependymal		brain	forebrain					A. MacDonald, B. Lu, M. Caron, N. Caporicci-Dinucci, D. Hatrock, K. Petrecca, et al., Single Cell Transcriptomics of Ependymal Cells Across Age, Region and Species Reveals Cilia-Related and Metal Ion Regulatory Roles as Major Conserved Ependymal Cell Functions, Front Cell Neurosci. 15 (2021) 703951. 10.3389/fncel.2021.703951.	-0.019689	-0.0476241	-0.0513179	-0.0206493	-0.055299	0.207227	-0.0532201	-0.0417213	-0.0560371	-0.0387886	-0.0609694	-0.0449972	-0.0231454	-0.0438538	0.0269316	-0.051817	-0.0229871	-0.017774	0.0131981	-0.0445934	0.00901196	-0.0282767	-0.0473926	0.165683	-0.0642318	-0.0307041	0.067777	-0.0642318	-0.015644	-0.0343658	-0.0554346	-0.0305995	-0.0642318	-0.038881	-0.0642318	0.0122148	0.257288
Fam183b	mRNA	Fam183b	Mus musculus	ependymal		brain	forebrain				ventricular_lining	A. MacDonald, B. Lu, M. Caron, N. Caporicci-Dinucci, D. Hatrock, K. Petrecca, et al., Single Cell Transcriptomics of Ependymal Cells Across Age, Region and Species Reveals Cilia-Related and Metal Ion Regulatory Roles as Major Conserved Ependymal Cell Functions, Front Cell Neurosci. 15 (2021) 703951. 10.3389/fncel.2021.703951.	-0.0313894	-0.056436	-0.0435321	-0.0216991	-0.0384697	0.119861	-0.0398372	-0.0380995	-0.0377198	-0.0457528	-0.041767	-0.027832	-0.0367117	-0.0427798	-0.0166404	-0.0481659	-0.0240281	-0.00348156	-0.0174801	-0.0399113	-0.0241934	-0.0252903	-0.0171839	0.18299	-0.0428094	-0.03857	-0.00425077	-0.027676	-0.0020292	-0.0364033	-0.056436	-0.00572401	-0.0439124	-0.056436	-0.0429011	-0.039619	-0.0413815
TMEM107	mRNA	Tmem107	Mus musculus	ependymal		brain	forebrain					A. MacDonald, B. Lu, M. Caron, N. Caporicci-Dinucci, D. Hatrock, K. Petrecca, et al., Single Cell Transcriptomics of Ependymal Cells Across Age, Region and Species Reveals Cilia-Related and Metal Ion Regulatory Roles as Major Conserved Ependymal Cell Functions, Front Cell Neurosci. 15 (2021) 703951. 10.3389/fncel.2021.703951.	-0.0290595	-0.0960768	-0.131725	0.0676269	-0.110065	0.153638	-0.11278	-0.0359631	-0.109586	0.05932	-0.10782	0.0288478	0.144226	0.0672273	0.0745453	-0.129767	0.120024	0.080137	0.0839847	0.0777857	0.0714261	0.023884	-0.106667	0.175829	0.055571	0.0666026	0.0260048	0.0553786	0.0910767	-0.114618	0.0305336	-0.089666	-0.0495319	-0.126273	-0.0123564	0.0441316	1.01967
Tppp3	mRNA	Tppp3	Mus musculus	ependymal		brain	forebrain					A. MacDonald, B. Lu, M. Caron, N. Caporicci-Dinucci, D. Hatrock, K. Petrecca, et al., Single Cell Transcriptomics of Ependymal Cells Across Age, Region and Species Reveals Cilia-Related and Metal Ion Regulatory Roles as Major Conserved Ependymal Cell Functions, Front Cell Neurosci. 15 (2021) 703951. 10.3389/fncel.2021.703951.	-0.117394	-0.0531723	-0.15097	-0.0811652	0.183994	-0.0447705	0.0734732	-0.140472	0.251535	-0.0838293	0.41374	-0.0899031	-0.0858827	-0.0916681	-0.100169	-0.145426	-0.100827	-0.111809	-0.0772196	-0.0729546	-0.0957942	-0.0682836	-0.194659	0.0316191	-0.108254	-0.0957156	-0.00797178	0.0842097	-0.076299	-0.160525	-0.111189	-0.142211	-0.0944069	-0.00851648	-0.129122	-0.0556664	-0.123481
Elof1	mRNA	Elof1	Mus musculus	ependymal		brain	forebrain					A. MacDonald, B. Lu, M. Caron, N. Caporicci-Dinucci, D. Hatrock, K. Petrecca, et al., Single Cell Transcriptomics of Ependymal Cells Across Age, Region and Species Reveals Cilia-Related and Metal Ion Regulatory Roles as Major Conserved Ependymal Cell Functions, Front Cell Neurosci. 15 (2021) 703951. 10.3389/fncel.2021.703951.	-0.0336317	0.0316364	-0.0221427	0.0180296	-0.0274387	0.0731083	-0.0279749	-0.0416937	-0.0274414	0.00443517	-0.0281192	0.0138417	0.0136291	0.0221006	0.0214078	-0.0225576	0.00710653	0.0334248	0.0766881	0.00189893	0.0208046	-0.00703195	-0.0496756	-0.00655863	0.0520101	0.0532427	-0.0174386	-0.0407157	0.0322432	-0.0427802	0.0290219	0.0202582	-0.0598025	0.0413719	-0.0249172	0.037261	0.0549648
Nudc	mRNA	Nudc	Mus musculus	ependymal		brain	forebrain					A. MacDonald, B. Lu, M. Caron, N. Caporicci-Dinucci, D. Hatrock, K. Petrecca, et al., Single Cell Transcriptomics of Ependymal Cells Across Age, Region and Species Reveals Cilia-Related and Metal Ion Regulatory Roles as Major Conserved Ependymal Cell Functions, Front Cell Neurosci. 15 (2021) 703951. 10.3389/fncel.2021.703951.	-0.0902352	0.246413	0.0129042	0.0357863	-0.0340741	0.0438364	-0.0320893	-0.0942832	-0.0276455	0.0441705	-0.0433433	0.0449826	0.0274509	0.0620997	0.0422384	0.0148941	0.0088294	0.043657	0.0267761	0.0259241	0.0600329	0.0791091	-0.0587089	0.0580381	-0.0449516	0.0447651	-0.114455	0.0183346	0.0451486	-0.0450418	0.0335493	-0.0201865	-0.0324858	0.224155	0.0307592	0.0384494	0.0923592
Hsp90aa1	mRNA	Hsp90aa1	Mus musculus	ependymal		brain	forebrain					A. MacDonald, B. Lu, M. Caron, N. Caporicci-Dinucci, D. Hatrock, K. Petrecca, et al., Single Cell Transcriptomics of Ependymal Cells Across Age, Region and Species Reveals Cilia-Related and Metal Ion Regulatory Roles as Major Conserved Ependymal Cell Functions, Front Cell Neurosci. 15 (2021) 703951. 10.3389/fncel.2021.703951.	-0.318663	0.207312	-0.0782999	-0.0971184	0.262713	0.00104009	0.313712	-0.324182	0.28795	-0.103585	0.10084	-0.101687	-0.0832949	-0.123762	-0.117246	-0.0820739	-0.0837626	-0.0929346	-0.122452	-0.0717776	-0.0973802	-0.0805223	-0.184591	-0.0522597	-0.0305334	-0.076238	-0.279303	0.00452541	-0.0659742	0.0838529	-0.181979	-0.148279	-0.182722	0.243141	-0.0856495	-0.121579	0.134389
Rarres2	mRNA	Rarres2	Mus musculus	ependymal		brain	forebrain				adult	A. MacDonald, B. Lu, M. Caron, N. Caporicci-Dinucci, D. Hatrock, K. Petrecca, et al., Single Cell Transcriptomics of Ependymal Cells Across Age, Region and Species Reveals Cilia-Related and Metal Ion Regulatory Roles as Major Conserved Ependymal Cell Functions, Front Cell Neurosci. 15 (2021) 703951. 10.3389/fncel.2021.703951.	0.0542055	0.453431	-0.0672091	-0.0645908	-0.0511309	0.505771	-0.0539101	0.0316948	-0.0456587	-0.0590674	-0.0575612	-0.0641456	-0.0709574	-0.0736509	-0.0545318	-0.0702778	-0.072147	-0.0629476	-0.0635724	-0.070198	-0.0778063	-0.0610752	-0.0512593	-0.0574541	-0.0752879	-0.0681953	0.124365	0.119843	-0.0540526	-0.047049	-0.0769107	-0.0648443	0.649502	0.454184	-0.0888731	-0.0814549	0.00520248
Chchd10	mRNA	Chchd10	Mus musculus	ependymal		brain	forebrain					A. MacDonald, B. Lu, M. Caron, N. Caporicci-Dinucci, D. Hatrock, K. Petrecca, et al., Single Cell Transcriptomics of Ependymal Cells Across Age, Region and Species Reveals Cilia-Related and Metal Ion Regulatory Roles as Major Conserved Ependymal Cell Functions, Front Cell Neurosci. 15 (2021) 703951. 10.3389/fncel.2021.703951.	0.105128	-0.00469768	0.0588622	-0.0346979	-0.00481397	0.0831351	0.03646	0.104443	-0.0288027	-0.00416966	-0.0657112	-0.0539468	-0.084968	-0.0204402	-0.0849919	0.0618168	0.0218639	-0.078262	-0.106243	0.0572898	-0.0451234	0.00452598	-0.0665693	-0.129657	-0.0264761	-0.00826545	0.0905461	0.25588	-0.0214479	-0.130569	-0.0547084	-0.0805724	-0.00788679	0.143008	0.0309181	0.0411671	0.301766
Flt1	mRNA	Flt1	Mus musculus	endothelial		brain	brain					H.W. Jeong, R. Dieguez-Hurtado, H. Arf, J. Song, H. Park, K. Kruse, et al., Single-cell transcriptomics reveals functionally specialized vascular endothelium in brain, Elife. 11 (2022) 10.7554/eLife.57520.	-0.0625575	9.32598	-0.0739865	-0.0821221	-0.0968013	0.259875	-0.100165	-0.0763894	-0.094042	-0.0884444	-0.103469	-0.0833691	-0.0897002	-0.083536	-0.0937775	-0.0741057	-0.0862409	-0.0667226	-0.0672016	-0.0935315	-0.0902492	-0.0936816	-0.0935875	-0.0685177	-0.0744695	-0.0723045	-0.0296225	-0.0556215	-0.0758776	-0.0884656	-0.0976056	-0.084739	0.440428	8.3793	-0.0615577	-0.107197	-0.0417561
Irf1	mRNA	Irf1	Mus musculus	endothelial	activated_endothelial	brain	cortex					H.W. Jeong, R. Dieguez-Hurtado, H. Arf, J. Song, H. Park, K. Kruse, et al., Single-cell transcriptomics reveals functionally specialized vascular endothelium in brain, Elife. 11 (2022) 10.7554/eLife.57520.	0.042052	0.724895	0.479693	-0.0171209	-0.0981532	0.209961	-0.0936713	0.0253698	-0.105469	-0.0445336	-0.106595	-0.0510383	0.0686396	-0.0802539	0.042498	0.459567	-0.0899632	0.0239998	0.0302468	-0.10294	0.0274064	-0.0816259	0.146655	0.367603	-0.063215	-0.0794932	0.109576	-0.0194803	0.0318187	-0.049407	-0.104786	-0.0996107	0.592988	0.589291	-0.116791	-0.06058	0.301198
CD34	mRNA	Cd34	not_specific	endothelial		circulation	circulation	endothelial_progenitor				K. Huizer, D.A.M. Mustafa, J.C. Spelt, J.M. Kros, A. Sacchetti, Improving the characterization of endothelial progenitor cell subsets by an optimized FACS protocol, PLoS One. 12 (2017) e0184895. 10.1371/journal.pone.0184895	-0.077493	4.31647	1.08318	-0.0653492	-0.0713078	0.0146766	-0.0796315	-0.0833399	-0.066084	-0.0596397	-0.0615181	-0.0666123	-0.0716138	-0.067103	-0.0834263	1.08146	-0.0537364	-0.0763706	-0.0804438	-0.072198	-0.0592354	-0.0834939	-0.0837278	-0.0600312	-0.0628812	-0.0460929	-0.0737624	-0.0677295	-0.071853	-0.0632495	-0.0210158	-0.0738366	-0.0151899	3.74301	-0.0778475	-0.0799805	-0.0721895
KDR	mRNA	Kdr	not_specific	endothelial		circulation	circulation	endothelial_progenitor				K. Huizer, D.A.M. Mustafa, J.C. Spelt, J.M. Kros, A. Sacchetti, Improving the characterization of endothelial progenitor cell subsets by an optimized FACS protocol, PLoS One. 12 (2017) e0184895. 10.1371/journal.pone.0184895	-0.0613866	4.33051	-0.000260848	-0.0597088	-0.0364014	0.0748122	-0.0511855	-0.0637122	-0.00758753	-0.0633569	-0.0425266	-0.0663898	-0.0324835	-0.0634682	-0.0674721	0.000888172	-0.0642355	-0.064034	-0.0653696	-0.069585	-0.0521167	-0.0271089	-0.0567928	-0.071868	-0.0611352	-0.0704027	-0.0722202	-0.048922	-0.077743	-0.0354381	-0.0656342	-0.0642519	0.0451311	3.7055	0.0329099	-0.0757736	0.22657
P2RY13	mRNA	P2ry13	Mus musculus	microglia		CNS	brain					E. Gerrits, Y. Heng, E. Boddeke, B.J.L. Eggen, Transcriptional profiling of microglia; current state of the art and future perspectives, Glia. 68 (2020) 740-55. 10.1002/glia.23767.	-0.0648222	-0.07489	1.56479	-0.0356716	-0.079399	-0.0180766	-0.0852572	-0.0665696	-0.0740771	-0.0319694	-0.0775317	-0.0165265	-0.0567271	-0.0393157	-0.0413443	1.54288	-0.0187053	-0.0326747	-0.0576155	-0.0326412	-0.0165361	-0.0296584	-0.0629171	-0.0584561	-0.0406299	-0.0118813	-0.0737578	-0.0505106	-0.0623179	-0.0720755	-0.0343796	-0.0675242	-0.0763651	-0.0528012	-0.0371145	-0.0381209	-0.0658613
Gpr34	mRNA	Gpr34	Mus musculus	microglia		CNS	brain					E. Gerrits, Y. Heng, E. Boddeke, B.J.L. Eggen, Transcriptional profiling of microglia; current state of the art and future perspectives, Glia. 68 (2020) 740-55. 10.1002/glia.23767.	-0.122716	-0.13514	3.95781	-0.0727448	-0.1415	0.0399675	-0.147161	-0.122377	-0.146768	-0.0654918	-0.13921	-0.0656061	-0.0995958	-0.0909562	-0.0695648	3.88966	-0.0754101	-0.0581172	-0.0800794	-0.0962396	-0.0696945	-0.041587	0.0101362	-0.0615891	-0.0871701	-0.0664497	-0.138812	-0.124859	-0.0807658	-0.112674	-0.0919944	-0.0696409	-0.0490826	-0.134833	-0.0402571	-0.0870559	-0.148503
TREM2	mRNA	Trem2	Mus musculus	microglia	phagocytic_microglia	CNS	brain					E. Gerrits, Y. Heng, E. Boddeke, B.J.L. Eggen, Transcriptional profiling of microglia; current state of the art and future perspectives, Glia. 68 (2020) 740-55. 10.1002/glia.23767.	-0.0859761	-0.0993531	2.8285	-0.0872662	-0.0695581	-0.00402373	-0.0715276	-0.0871368	-0.0698993	-0.0907683	-0.0801412	-0.0905268	-0.0888405	-0.0869998	-0.0922834	2.75458	-0.093715	-0.0810381	-0.0917265	-0.0907837	-0.0824463	-0.089624	-0.0742769	-0.0946025	-0.0742949	-0.0912827	-0.0993531	-0.0800979	-0.0915826	-0.0553223	-0.0891207	-0.0808272	-0.0910531	-0.0699396	-0.0834397	-0.0789513	-0.0741909
C1QA	mRNA	C1qa	Homo sapiens	microglia		brain	brain	macrophage				E. Gerrits, Y. Heng, E. Boddeke, B.J.L. Eggen, Transcriptional profiling of microglia; current state of the art and future perspectives, Glia. 68 (2020) 740-55. 10.1002/glia.23767.	-0.0950332	-0.0172615	3.46487	-0.110124	-0.0711187	0.0613271	-0.0666745	-0.0993292	-0.0857732	-0.114933	-0.092306	-0.116214	-0.120561	-0.114399	-0.1029	3.33598	-0.10828	-0.104338	-0.10801	-0.108553	-0.115843	-0.123605	-0.0882365	-0.109107	-0.117237	-0.110721	-0.0943604	-0.0221067	-0.113255	-0.0681547	-0.108165	-0.113109	-0.0186604	0.0138965	-0.0984452	-0.118439	-0.0827419
Icam_1	mRNA	Icam1	Homo sapiens	microglia		brain	brain					E. Gerrits, Y. Heng, E. Boddeke, B.J.L. Eggen, Transcriptional profiling of microglia; current state of the art and future perspectives, Glia. 68 (2020) 740-55. 10.1002/glia.23767.	-0.0622241	0.635167	1.13962	-0.0586556	-0.0599139	0.0635413	-0.0608489	-0.0629263	-0.0637366	-0.0582588	-0.0608774	-0.0617184	-0.0657716	-0.0600929	-0.0608725	1.09616	-0.0657716	-0.0595703	-0.0561235	-0.0549469	-0.0639104	-0.0577239	-0.0156759	-0.0626023	-0.058952	-0.0574078	-0.0657716	-0.056176	-0.0363316	-0.0657716	-0.0476169	-0.0657716	0.409202	0.568745	-0.0600467	-0.0657716	0.00748262
CD33	mRNA	Cd33	Homo sapiens	microglia		brain	brain	ependymal				E. Gerrits, Y. Heng, E. Boddeke, B.J.L. Eggen, Transcriptional profiling of microglia; current state of the art and future perspectives, Glia. 68 (2020) 740-55. 10.1002/glia.23767.	-0.104928	-0.112978	3.80469	-0.105686	-0.0974981	0.0245928	-0.0981637	-0.108624	-0.10505	-0.109533	-0.102493	-0.111551	-0.108681	-0.104257	-0.109515	3.66273	-0.110333	-0.10507	-0.10535	-0.106676	-0.109743	-0.111783	-0.103443	-0.110235	-0.107405	-0.105054	-0.107253	-0.0696872	-0.112978	-0.109738	-0.103441	-0.102147	-0.0841896	-0.090315	-0.107214	-0.112978	-0.106848
SALL3	mRNA	Sall3	Mus musculus	microglia		brain	brain					E. Gerrits, Y. Heng, E. Boddeke, B.J.L. Eggen, Transcriptional profiling of microglia; current state of the art and future perspectives, Glia. 68 (2020) 740-55. 10.1002/glia.23767.	0.631885	-0.2059	1.26386	-0.0710116	-0.204609	-0.0411945	-0.206312	0.688854	-0.202539	-0.171459	-0.209459	-0.198004	-0.202097	0.99908	-0.162839	1.24663	-0.0774665	-0.0987396	-0.216828	-0.191802	-0.182368	-0.198592	0.0782789	-0.0394038	0.0958776	-0.193875	0.357555	-0.168734	-0.124775	-0.195659	-0.199549	-0.208935	-0.161798	-0.171765	-0.202693	1.09729	-0.185044
GPNMB	mRNA	Gpnmb	Homo sapiens	microglia		brain	white_matter					E. Gerrits, Y. Heng, E. Boddeke, B.J.L. Eggen, Transcriptional profiling of microglia; current state of the art and future perspectives, Glia. 68 (2020) 740-55. 10.1002/glia.23767.	0.047432	-0.0339512	-0.0462375	-0.0198035	-0.044551	-0.0214517	-0.0450066	0.041281	-0.0481981	-0.023118	-0.0407627	-0.0166352	0.00774405	-0.0259602	-0.0257003	-0.0464037	-0.0236599	0.00580434	-0.0216012	-0.0313361	-0.0419437	-0.0242634	0.0167289	-0.039034	-0.0257611	-0.0468139	0.12327	-0.0409552	-0.0211001	-0.0305153	0.019628	-0.00391636	-0.0505363	-0.0252201	-0.0440628	0.0484961	-0.0354906
C3	mRNA	C3	Homo sapiens	microglia		brain	brain					E. Gerrits, Y. Heng, E. Boddeke, B.J.L. Eggen, Transcriptional profiling of microglia; current state of the art and future perspectives, Glia. 68 (2020) 740-55. 10.1002/glia.23767.	-0.0175416	-0.0383501	-0.0254694	-0.0100187	-0.033316	0.0106476	-0.0340544	-0.0291649	-0.0301765	0.00871039	-0.0367231	0.00867424	-0.0290801	-0.0237806	-0.0345677	-0.0259672	-0.0233856	-0.025752	-0.0147748	0.00616285	-0.00079175	0.0115955	-0.0271528	-0.0229403	-0.026376	-0.0200311	0.0673168	0.172178	-0.0111032	-0.0183534	-0.0287212	-0.0277162	-0.025849	-0.0383501	-0.0116805	-0.031301	-0.0383501
NUPR1	mRNA	Nupr1	Homo sapiens	microglia		brain	white_matter					E. Gerrits, Y. Heng, E. Boddeke, B.J.L. Eggen, Transcriptional profiling of microglia; current state of the art and future perspectives, Glia. 68 (2020) 740-55. 10.1002/glia.23767.	-0.0619731	0.011432	0.692228	-0.0736959	-0.0266709	0.357772	-0.0149033	-0.066045	-0.0291739	-0.0770571	-0.0666549	-0.0782548	-0.0721822	-0.0697612	-0.0802735	0.685958	-0.0763152	-0.0739755	-0.0696386	-0.0771139	-0.0765437	-0.0806069	-0.0554386	-0.0730864	-0.0816207	-0.0762103	-0.0605131	-0.0377141	-0.0453934	-0.034364	-0.0779089	-0.0755341	2.31199	0.0590761	-0.0615841	-0.0584242	-0.068874
Sparc	mRNA	Sparc	Mus musculus	microglia		brain	brain					E. Gerrits, Y. Heng, E. Boddeke, B.J.L. Eggen, Transcriptional profiling of microglia; current state of the art and future perspectives, Glia. 68 (2020) 740-55. 10.1002/glia.23767.	1.21681	2.38075	0.787339	-0.272634	-0.186742	0.291869	-0.188296	1.27144	-0.204487	-0.284373	-0.166348	-0.286237	-0.258304	-0.279068	-0.270133	0.783654	-0.287736	-0.266938	-0.26275	-0.280495	-0.28438	-0.283874	0.146688	-0.270347	-0.261838	-0.268487	1.02188	0.00399217	-0.252464	-0.109726	-0.293327	-0.261767	0.633163	2.07325	-0.274063	-0.266769	-0.038205
Cxcr4	mRNA	Cxcr4	Homo sapiens	microglia		brain	white_matter					E. Gerrits, Y. Heng, E. Boddeke, B.J.L. Eggen, Transcriptional profiling of microglia; current state of the art and future perspectives, Glia. 68 (2020) 740-55. 10.1002/glia.23767.	0.0229567	-0.00433113	-0.0288717	-0.0324383	-0.0330536	0.0387896	-0.0337764	0.00642266	-0.0316203	-0.0293841	-0.0358312	-0.0364523	-0.0309529	-0.0339521	-0.033676	-0.0333308	-0.0332914	-0.0289083	-0.0280288	-0.0374581	-0.0374581	-0.0374581	-0.0318599	-0.0303589	-0.0374581	-0.0374581	0.0884792	-0.0374581	-0.0211057	-0.0274606	-0.0287442	-0.0268252	-0.0374581	0.000466848	-0.0374581	-0.0374581	-0.0374581
CIITA	mRNA	Ciita	Homo sapiens	microglia		brain	brain					E. Gerrits, Y. Heng, E. Boddeke, B.J.L. Eggen, Transcriptional profiling of microglia; current state of the art and future perspectives, Glia. 68 (2020) 740-55. 10.1002/glia.23767.	-0.0374469	-0.138588	-0.0546879	0.107613	-0.145004	-0.0370759	-0.149101	-0.0324796	-0.144939	0.19801	-0.139894	0.106308	-0.00395318	0.235069	0.0194123	-0.112189	0.104156	-0.00651079	0.0459845	0.0731225	0.105624	0.146059	-0.110315	-0.00991337	-0.0510644	0.147061	-0.0633743	-0.0448018	-0.0114019	-0.0583755	0.233419	0.126319	-0.115041	-0.119102	0.398008	0.285347	-0.0203738
CCL2	mRNA	Ccl2	Homo sapiens	microglia		brain	grey_matter					E. Gerrits, Y. Heng, E. Boddeke, B.J.L. Eggen, Transcriptional profiling of microglia; current state of the art and future perspectives, Glia. 68 (2020) 740-55. 10.1002/glia.23767.	-0.0238846	-0.00820792	-0.00331168	-0.0138407	-0.022551	0.011512	-0.0229119	-0.0237312	-0.0212522	-0.0139958	-0.0231257	-0.0177054	-0.0182535	-0.0212489	-0.0209732	-0.00826234	-0.020589	-0.0204809	-0.0200417	-0.0150224	-0.0142202	-0.0247504	0.00320483	-0.00744647	-0.0247504	-0.0247504	-0.0247504	-0.0151939	-0.0147953	-0.0247504	-0.0247504	-0.014131	0.0376702	0.0257521	-0.0112582	-0.0105511	0.00526381
Olfm3	mRNA	Olfm3	non_specific	microglia		CNS	brain					E. Gerrits, Y. Heng, E. Boddeke, B.J.L. Eggen, Transcriptional profiling of microglia; current state of the art and future perspectives, Glia. 68 (2020) 740-55. 10.1002/glia.23767.	-0.547136	-0.522709	-0.556255	0.603491	-0.569895	-0.48882	-0.559551	-0.542466	-0.580937	1.16611	-0.580774	0.851169	0.159139	0.575188	0.669226	-0.520794	0.130629	0.492187	0.360659	0.469941	0.750442	0.579705	-0.507406	0.245506	0.371435	0.291191	-0.565797	-0.0664509	0.535869	-0.583126	-0.10039	-0.0787833	-0.573145	-0.473355	1.09045	-0.00920579	-0.577436
Camp	mRNA	Camp	Mus musculus	microglia		brain	cerebellum_hippocampus					E. Gerrits, Y. Heng, E. Boddeke, B.J.L. Eggen, Transcriptional profiling of microglia; current state of the art and future perspectives, Glia. 68 (2020) 740-55. 10.1002/glia.23767.	-0.0412615	-0.0524754	-0.0604777	0.0142304	-0.0520979	-0.0264514	-0.0561647	-0.0394039	-0.0526938	0.0383838	-0.0399693	0.0187835	-0.0198408	0.0353675	-0.0162498	-0.0532175	0.0422719	-0.0364192	-0.0373612	0.0653591	0.0233678	0.0285642	0.00391402	-0.0468489	0.0581608	0.0655982	-0.0539496	-0.0594924	-0.033098	-0.0507769	0.0429937	-0.0131418	-0.0063944	-0.0564096	-0.011304	0.0385009	-0.00879715
TNFRSF25	mRNA	Tnfrsf25	Homo sapiens	microglia		brain	grey_matter					E. Gerrits, Y. Heng, E. Boddeke, B.J.L. Eggen, Transcriptional profiling of microglia; current state of the art and future perspectives, Glia. 68 (2020) 740-55. 10.1002/glia.23767.	-0.048292	0.267715	-0.055777	0.028832	-0.0731178	-0.0155772	-0.0705559	-0.048311	-0.075786	0.0778029	-0.0767476	0.0495978	-0.0455972	0.117282	-0.0116817	-0.0497158	-0.00242363	-0.0216797	0.0203535	0.0274508	0.0704925	0.00413082	-0.015368	-0.0494213	-0.0557044	0.00501494	-0.0664891	-0.0215788	0.000173885	-0.071608	0.0180284	0.0182316	0.0187903	0.258256	0.05732	0.0506917	-0.0514649
MyD88	mRNA	Myd88	Homo sapiens	microglia		brain	brain					E. Gerrits, Y. Heng, E. Boddeke, B.J.L. Eggen, Transcriptional profiling of microglia; current state of the art and future perspectives, Glia. 68 (2020) 740-55. 10.1002/glia.23767.	-0.0104707	0.0119905	0.154833	-0.0148098	-0.0119841	0.0140243	-0.0318263	-0.00454638	-0.00182986	-0.00625168	0.0235995	-0.00995089	-0.061444	-0.0287045	0.0238239	0.152395	0.00382373	-0.0315129	-0.0635179	-0.0106503	-0.0283335	-0.0176414	-0.0577127	0.0671353	-0.0103094	0.00477339	-0.081496	-0.0534196	-0.0539293	-0.0218987	-0.0325685	-0.0289316	0.0418298	0.0518404	-0.0128247	-0.00595397	0.0565132
Synaptotagmin	mRNA	Syt1	Mus musculus	neuron		brain	hypothalamus					R. Chen, X. Wu, L. Jiang, Y. Zhang, Single-Cell RNA-Seq Reveals Hypothalamic Cell Diversity, Cell Rep. 18 (2017) 3227-41. 10.1016/j.celrep.2017.03.004.	-0.785632	-0.692249	-0.715525	0.812328	-0.764297	-0.586535	-0.751631	-0.783855	-0.77162	0.808552	-0.783655	0.900085	0.862149	1.24645	0.8447	-0.676484	0.389138	0.397504	0.726539	0.622934	0.77256	0.973681	-0.695362	0.679778	0.614506	0.580411	-0.798198	0.113812	0.849572	-0.79634	1.66787	1.11676	-0.736352	-0.650907	0.721095	1.18576	-0.28911
Dpep1	mRNA	Dpep1	Mus musculus	fibroblast		carotid_arteries	carotid_arteries					E A. Andueza, S. Kumar, J. Kim, D.W. Kang, H.L. Mumme, J.I. Perez, et al., Endothelial Reprogramming by Disturbed Flow Revealed by Single-Cell RNA and Chromatin Accessibility Study, Cell Rep. 33 (2020) 108491. 10.1016/j.celrep.2020.108491.	-0.028352	-0.0326846	-0.0283935	-0.0267261	-0.0314268	0.125182	-0.0320713	-0.0286046	-0.0303506	-0.0308918	-0.0326846	-0.0283558	-0.0114817	-0.0191134	-0.0326846	-0.0285593	-0.0326846	-0.0326846	-0.0326846	-0.0326846	-0.0221461	-0.0326846	-0.0270891	-0.0326846	-0.0326846	-0.0262711	-0.0326846	-0.0135565	-0.0127587	-0.0326846	-0.026011	-0.0234118	1.00432	-0.020049	-0.0191817	-0.0326846	-0.00593374
ICAM2	mRNA	Icam2	Mus musculus	endothelial		carotid_arteries	carotid_arteries					E A. Andueza, S. Kumar, J. Kim, D.W. Kang, H.L. Mumme, J.I. Perez, et al., Endothelial Reprogramming by Disturbed Flow Revealed by Single-Cell RNA and Chromatin Accessibility Study, Cell Rep. 33 (2020) 108491. 10.1016/j.celrep.2020.108491.	-0.0399214	2.58853	-0.0361682	-0.0406022	-0.0452445	0.0171957	-0.0452749	-0.0426242	-0.0465631	-0.0467327	-0.0446408	-0.0447396	-0.0380041	-0.0442223	-0.0333808	-0.0394689	-0.0477319	-0.0403	-0.0126937	-0.0477319	-0.0458292	-0.0477319	-0.0477319	-0.026172	-0.0352753	-0.0419212	-0.0401772	-0.0381535	-0.0405305	-0.0477319	-0.0428352	-0.0477319	-0.0124045	2.36203	-0.0406216	-0.0477319	-0.00260731
Tie1	mRNA	Tie1	Mus musculus	endothelial		carotid_arteries	carotid_arteries					E A. Andueza, S. Kumar, J. Kim, D.W. Kang, H.L. Mumme, J.I. Perez, et al., Endothelial Reprogramming by Disturbed Flow Revealed by Single-Cell RNA and Chromatin Accessibility Study, Cell Rep. 33 (2020) 108491. 10.1016/j.celrep.2020.108491.	-0.0484802	3.64632	-0.0552313	-0.0500343	-0.0500732	0.0419692	-0.0533872	-0.0480918	-0.0517224	-0.0500353	-0.0398424	-0.0525809	-0.0438347	-0.0517192	-0.0491749	-0.0469893	-0.0424608	-0.0552313	-0.0514708	-0.0552313	-0.0541322	-0.0485442	-0.0552313	-0.0552313	-0.0552313	-0.0535658	-0.0552313	-0.0360602	-0.0552313	-0.0552313	-0.0552313	-0.0552313	0.0757355	3.12835	-0.0451399	-0.0552313	-0.0251258
Speg	mRNA	Speg	Mus musculus	mural	smooth_muscle	carotid_arteries	carotid_arteries					E A. Andueza, S. Kumar, J. Kim, D.W. Kang, H.L. Mumme, J.I. Perez, et al., Endothelial Reprogramming by Disturbed Flow Revealed by Single-Cell RNA and Chromatin Accessibility Study, Cell Rep. 33 (2020) 108491. 10.1016/j.celrep.2020.108491.	-0.219674	-0.359827	-0.28595	0.35707	-0.409579	-0.102116	-0.409102	-0.221943	-0.412932	0.326494	-0.40994	0.357014	0.431337	0.431702	0.443963	-0.268297	0.300513	0.475099	0.286514	0.306061	0.330332	0.370904	-0.0606583	0.461503	0.171035	0.342619	-0.254593	-0.0441485	0.320495	-0.386867	0.354814	0.322261	0.110092	-0.311657	0.218774	0.724253	-0.0824088
Myl9	mRNA	Myl9	Mus musculus	mural	smooth_muscle	carotid_arteries	carotid_arteries					E A. Andueza, S. Kumar, J. Kim, D.W. Kang, H.L. Mumme, J.I. Perez, et al., Endothelial Reprogramming by Disturbed Flow Revealed by Single-Cell RNA and Chromatin Accessibility Study, Cell Rep. 33 (2020) 108491. 10.1016/j.celrep.2020.108491.	-0.0218105	0.643613	-0.0351088	-0.0447036	-0.050392	0.303443	-0.0545748	-0.0285744	-0.0471567	-0.0441883	-0.0484054	-0.0471934	-0.041778	-0.0525684	-0.0368245	-0.0361901	-0.0531911	-0.0370747	-0.054658	-0.0542799	-0.043375	-0.045209	-0.035615	-0.0491667	-0.0406862	-0.0452182	0.00501193	-0.0209395	-0.0358983	-0.0630841	-0.0396982	-0.0139396	0.167826	1.24662	-0.0387207	-0.0630841	-0.0329551
Medag	mRNA	Medag	Mus musculus	fibroblast		carotid_arteries	carotid_arteries					E A. Andueza, S. Kumar, J. Kim, D.W. Kang, H.L. Mumme, J.I. Perez, et al., Endothelial Reprogramming by Disturbed Flow Revealed by Single-Cell RNA and Chromatin Accessibility Study, Cell Rep. 33 (2020) 108491. 10.1016/j.celrep.2020.108491.	-0.124116	-0.122642	-0.15269	0.117974	-0.138146	0.0544659	-0.140238	-0.142107	-0.137016	0.0481269	-0.140806	0.038478	0.0293378	0.145151	-0.0644153	-0.144455	-0.0448356	-0.0424743	0.13834	-0.113852	0.160422	0.267998	-0.117583	-0.0864488	0.0293453	-0.033284	-0.110331	-0.0410975	0.381931	-0.0973446	1.1088	1.22228	0.878071	-0.104723	0.937125	0.261728	-0.0929236
Aspa	mRNA	Aspa	Mus musculus	oligodendrocyte		brain	median_emminence					R. Chen, X. Wu, L. Jiang, Y. Zhang, Single-Cell RNA-Seq Reveals Hypothalamic Cell Diversity, Cell Rep. 18 (2017) 3227-41. 10.1016/j.celrep.2017.03.004.	-0.415862	-0.606734	-0.594995	-0.626841	1.22745	-0.476638	1.22563	-0.407622	1.31122	-0.637943	1.12966	-0.637736	-0.623149	-0.635601	-0.635583	-0.595742	-0.63243	-0.62899	-0.629593	-0.634549	-0.635538	-0.633536	-0.603869	-0.633975	-0.614078	-0.625913	-0.48977	-0.588518	-0.625853	0.610917	-0.619424	-0.615609	-0.282936	-0.546526	-0.624393	-0.639035	-0.609125
Ermn	mRNA	Ermn	Mus musculus	oligodendrocyte		brain	median_emminence					R. Chen, X. Wu, L. Jiang, Y. Zhang, Single-Cell RNA-Seq Reveals Hypothalamic Cell Diversity, Cell Rep. 18 (2017) 3227-41. 10.1016/j.celrep.2017.03.004.	-0.415623	-0.420499	-0.36861	-0.450153	0.922705	-0.361745	0.774476	-0.419074	1.06758	-0.459137	1.12912	-0.457156	-0.445049	-0.455781	-0.453859	-0.370896	-0.45515	-0.44205	-0.448378	-0.451656	-0.458466	-0.452734	-0.408159	-0.450767	-0.437973	-0.456834	-0.420137	-0.388997	-0.436723	0.428416	-0.460955	-0.450705	-0.39138	-0.391064	-0.443795	-0.460435	-0.415222
Ppp1r14a	mRNA	Ppp1r14a	Mus musculus	oligodendrocyte		brain	median_emminence					R. Chen, X. Wu, L. Jiang, Y. Zhang, Single-Cell RNA-Seq Reveals Hypothalamic Cell Diversity, Cell Rep. 18 (2017) 3227-41. 10.1016/j.celrep.2017.03.004.	-0.363208	-0.248802	-0.320521	-0.382023	0.773377	-0.237769	0.668831	-0.365837	0.857329	-0.389994	0.918364	-0.390473	-0.380708	-0.381629	-0.391471	-0.323904	-0.383515	-0.39103	-0.388237	-0.378037	-0.379431	-0.395689	-0.350999	-0.377816	-0.369036	-0.38285	-0.373101	-0.292111	-0.383152	0.529764	-0.393088	-0.369903	-0.208482	-0.136481	-0.369153	-0.396857	-0.358961
Klk6	mRNA	Klk6	Mus musculus	oligodendrocyte	myelinating_OL	brain	median_emminence					R. Chen, X. Wu, L. Jiang, Y. Zhang, Single-Cell RNA-Seq Reveals Hypothalamic Cell Diversity, Cell Rep. 18 (2017) 3227-41. 10.1016/j.celrep.2017.03.004.	-0.125032	-0.122402	-0.115428	-0.147047	0.294522	-0.109894	-0.088805	-0.130252	0.06048	-0.152573	1.68536	-0.146475	-0.144659	-0.150391	-0.144737	-0.115979	-0.155742	-0.135376	-0.145445	-0.149447	-0.142448	-0.159698	-0.138775	-0.150004	-0.148043	-0.14615	-0.0982431	-0.0798826	-0.141081	-0.127199	-0.158946	-0.150398	-0.107955	-0.0977575	-0.160057	-0.133107	-0.11865
C1qc	mRNA	C1qc	Mus musculus	microglia		brain	median_emminence					R. Chen, X. Wu, L. Jiang, Y. Zhang, Single-Cell RNA-Seq Reveals Hypothalamic Cell Diversity, Cell Rep. 18 (2017) 3227-41. 10.1016/j.celrep.2017.03.004.	-0.107036	-0.0707379	3.6989	-0.111358	-0.0819623	0.0535882	-0.083555	-0.110939	-0.0938145	-0.116298	-0.0867913	-0.116016	-0.116105	-0.116733	-0.1136	3.56627	-0.119074	-0.111405	-0.108558	-0.103791	-0.117194	-0.116814	-0.0911566	-0.112715	-0.113767	-0.0994666	-0.102623	-0.0450793	-0.112651	-0.10655	-0.110425	-0.112315	-0.0815981	-0.0590254	-0.105717	-0.117465	-0.0765606
Cspg5	mRNA	Cspg5	Mus musculus	oligodendrocyte	OPC	brain	median_emminence					R. Chen, X. Wu, L. Jiang, Y. Zhang, Single-Cell RNA-Seq Reveals Hypothalamic Cell Diversity, Cell Rep. 18 (2017) 3227-41. 10.1016/j.celrep.2017.03.004.	-0.0322648	-0.347945	-0.367378	0.198822	-0.373303	0.696887	-0.36633	-0.000872289	-0.370218	0.225216	-0.389192	0.237347	0.354487	0.0552262	0.21592	-0.349367	0.294729	0.277533	0.183338	0.277045	0.217102	0.1329	2.72301	0.0569581	0.301492	0.337462	-0.215843	-0.104148	0.202706	-0.411105	0.144113	-0.0886845	-0.362255	-0.330526	-0.0774071	0.154505	-0.338133
Ccnd1	mRNA	Ccnd1	Mus musculus	oligodendrocyte	OPC	brain	median_emminence					R. Chen, X. Wu, L. Jiang, Y. Zhang, Single-Cell RNA-Seq Reveals Hypothalamic Cell Diversity, Cell Rep. 18 (2017) 3227-41. 10.1016/j.celrep.2017.03.004.	-0.101726	0.190526	0.357605	0.0160927	-0.0948589	0.4385	-0.0980823	-0.107693	-0.0933521	0.0518178	-0.0903223	0.0306649	0.00823464	0.0104063	-0.0316812	0.332392	0.0559765	0.00151268	-0.0556386	0.0803193	0.0335645	-0.0233217	1.40707	-0.021552	-0.000415123	0.0102593	-0.102808	-0.00394972	0.00343368	-0.0473943	-0.0302785	-0.0178948	-0.111371	0.167487	-0.0100835	0.0339061	-0.0596326
Kcnip3	mRNA	Kcnip3	Mus musculus	oligodendrocyte	OPC	brain	median_emminence					R. Chen, X. Wu, L. Jiang, Y. Zhang, Single-Cell RNA-Seq Reveals Hypothalamic Cell Diversity, Cell Rep. 18 (2017) 3227-41. 10.1016/j.celrep.2017.03.004.	1.40861	-0.351584	0.167958	-0.188812	-0.368013	0.773222	-0.356309	1.57542	-0.379352	-0.314103	-0.386679	-0.278344	-0.0857453	0.0524101	-0.166319	0.166874	-0.266049	-0.161919	-0.158105	-0.287823	-0.155019	-0.241589	2.58133	-0.132279	-0.372183	-0.179345	0.517631	-0.231034	0.0402383	-0.304228	0.47261	-0.197808	-0.0497253	-0.310131	-0.0479718	-0.143068	-0.24622
CD9	mRNA	Cd9	Mus musculus	oligodendrocyte	OPC	brain	median_emminence					R. Chen, X. Wu, L. Jiang, Y. Zhang, Single-Cell RNA-Seq Reveals Hypothalamic Cell Diversity, Cell Rep. 18 (2017) 3227-41. 10.1016/j.celrep.2017.03.004.	-0.0379155	0.0125128	0.762807	-0.302299	0.31536	0.548284	0.538199	-0.0996923	0.201478	-0.307832	-0.194495	-0.312819	-0.300383	-0.308254	-0.29443	0.737058	-0.310425	-0.308275	-0.295299	-0.301643	-0.302675	-0.315387	1.03356	-0.294098	-0.305251	-0.315489	0.301757	-0.210164	-0.299405	1.41264	-0.303153	-0.292421	0.0739243	0.0851786	-0.302671	-0.305964	0.304964
Bmp4	mRNA	Bmp4	Mus musculus	oligodendrocyte	premyelinating_OL	brain	median_emminence					R. Chen, X. Wu, L. Jiang, Y. Zhang, Single-Cell RNA-Seq Reveals Hypothalamic Cell Diversity, Cell Rep. 18 (2017) 3227-41. 10.1016/j.celrep.2017.03.004.	-0.0585793	0.139693	-0.0678495	-0.0413481	-0.064538	0.539125	-0.0649006	-0.0622251	-0.0650512	-0.0289412	-0.0717003	-0.0451259	-0.0636171	-0.0265215	-0.0468973	-0.0704801	0.00368478	-0.05461	-0.0514057	-0.000806832	-0.0588399	-0.0600745	-0.0573079	-0.0764692	-0.0675699	-0.0519697	-0.0553093	-0.0188345	-0.0522949	1.357	-0.065185	-0.0764692	1.11221	0.175484	-0.015124	-0.0764692	0.788863
Fyn	mRNA	Fyn	Mus musculus	oligodendrocyte	premyelinating_OL	brain	median_emminence					R. Chen, X. Wu, L. Jiang, Y. Zhang, Single-Cell RNA-Seq Reveals Hypothalamic Cell Diversity, Cell Rep. 18 (2017) 3227-41. 10.1016/j.celrep.2017.03.004.	0.240685	-0.325844	-0.655683	0.177254	-0.328574	0.173095	-0.337558	0.256392	-0.331517	0.150367	-0.344203	0.206873	0.417475	0.171064	0.17453	-0.623145	0.120801	0.29852	0.272463	0.0787066	0.189007	0.251345	0.621453	0.0845007	0.162544	0.118511	0.0892768	-0.359461	0.238726	1.14	0.0360711	0.00928272	-0.528981	-0.342021	0.0182237	0.207579	-0.721154
Mycl	mRNA	Mycl	Mus musculus	oligodendrocyte	premyelinating_OL	brain	median_emminence					R. Chen, X. Wu, L. Jiang, Y. Zhang, Single-Cell RNA-Seq Reveals Hypothalamic Cell Diversity, Cell Rep. 18 (2017) 3227-41. 10.1016/j.celrep.2017.03.004.	-0.0399104	-0.0178763	-0.0289614	-0.00462899	-0.0550949	0.121738	-0.0566382	-0.0370329	-0.0536636	-0.0174859	-0.053034	-0.00115812	0.0303338	-0.0381441	0.0329678	-0.0263196	-0.0139829	0.0413636	0.037619	-0.037702	0.0298545	-0.0044265	0.164339	-0.0133998	-0.0205148	-0.0443561	-0.0601468	-0.00403229	-0.00573882	0.470692	-0.0554579	-0.0293889	-0.0551789	0.0124169	-0.0270662	-0.0373475	-0.0526451
Itm2a	mRNA	Itm2a	Mus musculus	epithelial		brain	median_emminence					R. Chen, X. Wu, L. Jiang, Y. Zhang, Single-Cell RNA-Seq Reveals Hypothalamic Cell Diversity, Cell Rep. 18 (2017) 3227-41. 10.1016/j.celrep.2017.03.004.	-0.0713325	6.72157	-0.110665	-0.0330681	-0.0903488	0.108405	-0.0860716	-0.0799612	-0.102365	-0.0348676	-0.0900413	-0.0179563	-0.0454473	0.0473034	0.0201706	-0.110536	-0.0839962	-0.0137951	-0.0381558	-0.0485008	-0.0530879	-0.0524469	-0.0897805	-0.0428221	-0.0794983	-0.0300662	-0.0252207	0.00693596	-0.0614819	-0.113175	-0.106931	-0.037111	0.493401	5.63565	-0.0845484	-0.0155189	0.0127104
TMEM108	mRNA	Tmem108	Mus musculus	oligodendrocyte	premyelinating_OL	brain	median_emminence					R. Chen, X. Wu, L. Jiang, Y. Zhang, Single-Cell RNA-Seq Reveals Hypothalamic Cell Diversity, Cell Rep. 18 (2017) 3227-41. 10.1016/j.celrep.2017.03.004.	-0.640415	-0.767625	-0.764782	0.341721	-0.27497	0.382003	-0.269825	-0.693799	-0.313693	0.308528	-0.260589	0.368108	0.0861623	0.242232	0.407332	-0.73121	0.183802	0.469857	0.508081	0.150081	0.481419	0.642755	0.358006	0.335377	0.395203	0.304577	-0.338964	-0.264849	0.490042	0.618928	-0.0765272	1.10235	-0.751068	-0.696126	0.373581	0.0208661	2.3733
Snhg11	mRNA	Snhg11	Mus musculus	neuron		brain	median_emminence					R. Chen, X. Wu, L. Jiang, Y. Zhang, Single-Cell RNA-Seq Reveals Hypothalamic Cell Diversity, Cell Rep. 18 (2017) 3227-41. 10.1016/j.celrep.2017.03.004.	-0.814612	-0.515215	-0.839086	0.887179	-0.863337	-0.568383	-0.81165	-0.820681	-0.912298	0.879943	-0.911297	0.888964	0.899474	0.886655	0.937259	-0.785356	0.868596	0.880827	0.890244	0.907487	0.890289	0.888409	-0.796159	0.994586	0.84899	0.896199	-0.739154	0.688246	0.847032	-0.987415	0.898152	0.894986	-0.321511	-0.467041	0.902717	0.935424	-0.805184
Cdo1	mRNA	Cdo1	Mus musculus	oligodendrocyte	OPC	brain	median_emminence					R. Chen, X. Wu, L. Jiang, Y. Zhang, Single-Cell RNA-Seq Reveals Hypothalamic Cell Diversity, Cell Rep. 18 (2017) 3227-41. 10.1016/j.celrep.2017.03.004.	-0.0551993	-0.115782	-0.128469	0.0446449	-0.10657	0.400441	-0.123148	-0.0636855	-0.0955502	0.0528805	-0.084398	0.0498118	0.0355681	0.0531136	0.0337295	-0.12179	0.0408608	0.0893697	0.0676872	0.0629121	0.0975933	-0.00424098	1.33522	0.0276961	0.116452	0.0657294	-0.0293126	-0.00869306	0.0722196	-0.0493555	-0.0609734	-0.0498603	-0.0677399	-0.0938079	0.0660967	0.0364114	-0.158886
CD133	mRNA	Prom1	Mus musculus	ependymal		brain	lateral_ventricles					P.T. Shah, J.A. Stratton, M.G. Stykel, S. Abbasi, S. Sharma, K.A. Mayr, et al., Single-Cell Transcriptomics and Fate Mapping of Ependymal Cells Reveals an Absence of Neural Stem Cell Function, Cell. 173 (2018) 1045-57 e9. 10.1016/j.cell.2018.03.063.	-0.0624675	4.64268	-0.0845714	-0.0597086	-0.0327055	0.14346	-0.0695759	-0.0722593	-0.0890673	-0.0770786	-0.0842224	-0.0722862	-0.0814761	-0.0771944	-0.0620543	-0.0789082	-0.0553882	-0.0778317	-0.0880979	-0.0780471	-0.0792271	-0.0773287	-0.0680321	-0.0541906	-0.0715253	-0.0398226	-0.0202995	-0.00413239	-0.022129	2.02449	0.18705	-0.0775155	-0.0615653	3.86998	-0.0633091	-0.088543	-0.0339432
BDNF	mRNA	Bdnf	non_specific	neuron	preganglionic_sympatetic	CNS	spine	cholinergic		yes		C.G. Causing, A. Gloster, R. Aloyz, S.X. Bamji, E. Chang, J. Fawcett, et al., Synaptic Innervation Density Is Regulated by Neuron-Derived BDNF, Neuron. 18 (1997) 257–67. https://www.cell.com/fulltext/S0896-6273(00)80266-4#secd33944447e474.	-0.0974172	-0.217452	-0.14014	0.15927	-0.165922	-0.136328	-0.164608	-0.0842944	-0.168145	-0.0987788	-0.165976	0.275585	-0.129478	-0.169035	0.670873	-0.13895	-0.154264	-0.0819079	0.505041	0.0738852	0.577351	0.385118	-0.165444	1.10409	-0.191644	0.0811296	-0.18634	-0.0527385	-0.0812666	-0.179454	0.661673	0.413856	-0.184987	-0.217452	0.232626	-0.17428	-0.187224
TrkB	mRNA	Ntrk2	non_specific	neuron	preganglionic_sympatetic	CNS	spine	cholinergic				C.G. Causing, A. Gloster, R. Aloyz, S.X. Bamji, E. Chang, J. Fawcett, et al., Synaptic Innervation Density Is Regulated by Neuron-Derived BDNF, Neuron. 18 (1997) 257–67. https://www.cell.com/fulltext/S0896-6273(00)80266-4#secd33944447e474.	0.88773	-0.898979	-0.927058	0.474071	-0.936144	-0.0635275	-0.925707	0.887792	-0.947191	0.515115	-0.951949	0.537326	0.565091	0.526955	0.533831	-0.881018	0.410098	0.561893	0.531656	0.388391	0.55297	0.43994	0.425585	0.180391	0.42167	0.410856	0.925554	-0.129001	0.536219	-0.814437	0.391391	0.453938	-0.683202	-0.782095	0.305849	0.674107	-0.0316311
F3	mRNA	F3	non_specific	astrocyte		brain	brain					Y. Zhang, S.A. Sloan, L.E. Clarke, C. Caneda, C.A. Plaza, P.D. Blumenthal, et al., Purification and Characterization of Progenitor and Mature Human Astrocytes Reveals Transcriptional and Functional Differences with Mouse, Neuron. 89 (2016) 37-53. 10.1016/j.neuron.2015.11.013.	1.70689	-0.245919	-0.229563	-0.248812	-0.25863	0.192478	-0.250367	1.86192	-0.267786	-0.264682	-0.265596	-0.251516	-0.199642	-0.27677	-0.265125	-0.211666	-0.242769	-0.236007	-0.239143	-0.267136	-0.261897	-0.271586	0.466722	-0.253191	-0.255449	-0.203522	0.835941	-0.190317	-0.230892	-0.257845	-0.123189	-0.287879	0.682808	-0.182814	-0.270621	-0.254983	-0.143584
Elovl2	mRNA	Elovl2	non_specific	astrocyte		brain	brain					Y. Zhang, S.A. Sloan, L.E. Clarke, C. Caneda, C.A. Plaza, P.D. Blumenthal, et al., Purification and Characterization of Progenitor and Mature Human Astrocytes Reveals Transcriptional and Functional Differences with Mouse, Neuron. 89 (2016) 37-53. 10.1016/j.neuron.2015.11.013.	0.745895	-0.123378	-0.160586	-0.0493468	-0.161619	-0.128793	-0.160207	0.844402	-0.158407	-0.0773872	-0.168526	-0.0608274	0.0261131	-0.0652245	0.00633427	-0.149912	-0.00731502	0.0171037	-0.067563	-0.0239497	-0.0232891	-0.117921	-0.172356	-0.0651132	0.0723662	-0.0716736	0.186628	-0.0363406	0.0537396	-0.179622	-0.158186	-0.100416	-0.141489	-0.119653	-0.168148	-0.14137	-0.163967
Acsbg1	mRNA	Acsbg1	non_specific	astrocyte		brain	brain					Y. Zhang, S.A. Sloan, L.E. Clarke, C. Caneda, C.A. Plaza, P.D. Blumenthal, et al., Purification and Characterization of Progenitor and Mature Human Astrocytes Reveals Transcriptional and Functional Differences with Mouse, Neuron. 89 (2016) 37-53. 10.1016/j.neuron.2015.11.013.	2.13853	-0.284574	-0.277583	-0.292219	-0.282553	-0.173669	-0.279617	2.32997	-0.282922	-0.298593	-0.286425	-0.295782	-0.288827	-0.288463	-0.297758	-0.260215	-0.294675	-0.296121	-0.298948	-0.301	-0.291187	-0.297427	-0.192161	-0.295169	-0.298535	-0.291276	1.1957	-0.167806	-0.265433	-0.298468	-0.286925	-0.291175	-0.210408	-0.220386	-0.291955	-0.292753	-0.250555
Slc39a12	mRNA	Slc39a12	non_specific	astrocyte		brain	brain					Y. Zhang, S.A. Sloan, L.E. Clarke, C. Caneda, C.A. Plaza, P.D. Blumenthal, et al., Purification and Characterization of Progenitor and Mature Human Astrocytes Reveals Transcriptional and Functional Differences with Mouse, Neuron. 89 (2016) 37-53. 10.1016/j.neuron.2015.11.013.	2.21667	-0.302472	-0.251862	-0.318145	-0.318057	0.0827336	-0.317484	2.22511	-0.320039	-0.33522	-0.318564	-0.332001	-0.323865	-0.327019	-0.223805	-0.238519	-0.327034	-0.320479	-0.326661	-0.334727	-0.330561	-0.335801	-0.32065	-0.266543	-0.3139	-0.338414	2.23498	-0.214978	-0.328458	-0.322141	-0.326665	-0.323788	-0.277574	-0.233231	-0.336954	-0.322649	1.12484
Bmpr1b	mRNA	Bmpr1b	non_specific	astrocyte		brain	brain					Y. Zhang, S.A. Sloan, L.E. Clarke, C. Caneda, C.A. Plaza, P.D. Blumenthal, et al., Purification and Characterization of Progenitor and Mature Human Astrocytes Reveals Transcriptional and Functional Differences with Mouse, Neuron. 89 (2016) 37-53. 10.1016/j.neuron.2015.11.013.	1.8949	-0.292813	-0.315623	-0.219917	-0.308811	-0.119849	-0.304883	1.7988	-0.314519	-0.25904	-0.311071	-0.182193	-0.140173	-0.275299	-0.0797953	-0.299933	-0.271916	-0.235334	-0.200125	-0.194135	-0.227582	-0.260086	-0.308353	-0.249108	-0.31523	-0.225099	2.68701	-0.192457	-0.281368	-0.310008	-0.285803	-0.308444	-0.277095	-0.25174	-0.304185	-0.245847	0.36038
Ttyh1	mRNA	Ttyh1	non_specific	astrocyte		brain	brain					Y. Zhang, S.A. Sloan, L.E. Clarke, C. Caneda, C.A. Plaza, P.D. Blumenthal, et al., Purification and Characterization of Progenitor and Mature Human Astrocytes Reveals Transcriptional and Functional Differences with Mouse, Neuron. 89 (2016) 37-53. 10.1016/j.neuron.2015.11.013.	1.71568	-0.448018	-0.505256	-0.0988574	-0.403736	-0.145851	-0.360454	1.72012	-0.464667	-0.143916	-0.512484	-0.0784722	-0.157166	0.00365528	-0.0809257	-0.474406	-0.0541555	-0.139386	-0.00924735	-0.109512	-0.0259518	-0.0162729	-0.0930044	-0.245951	-0.174351	-0.026484	1.75381	-0.136711	-0.0824152	0.195798	0.0850633	-0.0522198	-0.404061	-0.372737	-0.160021	-0.0708085	-0.404572
Clu	mRNA	Clu	non_specific	astrocyte		brain	brain					Y. Zhang, S.A. Sloan, L.E. Clarke, C. Caneda, C.A. Plaza, P.D. Blumenthal, et al., Purification and Characterization of Progenitor and Mature Human Astrocytes Reveals Transcriptional and Functional Differences with Mouse, Neuron. 89 (2016) 37-53. 10.1016/j.neuron.2015.11.013.	0.936211	-0.0604723	-0.204238	-0.0844697	-0.23395	0.212547	-0.218021	0.886573	-0.239246	-0.0366123	-0.260017	-0.0148006	-0.105866	-0.0431312	-0.0518416	-0.197675	-0.201221	-0.0302655	-0.0898962	-0.143093	-0.0364235	-0.108924	-0.0864515	-0.0888886	-0.286096	-0.240214	1.4816	0.17562	-0.16091	-0.280522	-0.160102	-0.116811	-0.0200032	0.117331	-0.124804	-0.186512	0.816242
Pamr1	mRNA	Pamr1	non_specific	astrocyte		brain	brain					Y. Zhang, S.A. Sloan, L.E. Clarke, C. Caneda, C.A. Plaza, P.D. Blumenthal, et al., Purification and Characterization of Progenitor and Mature Human Astrocytes Reveals Transcriptional and Functional Differences with Mouse, Neuron. 89 (2016) 37-53. 10.1016/j.neuron.2015.11.013.	0.270906	-0.14323	-0.135989	0.0162413	-0.129767	0.0616525	-0.130673	0.101579	-0.12704	-0.0500855	-0.130626	-0.00701005	-0.0801904	0.0138308	0.116282	-0.130384	-0.0880115	-0.0115347	1.14106	-0.102966	-0.0528474	-0.0278257	-0.0408282	-0.0480807	-0.113176	-0.104342	1.27447	-0.0674146	-0.0211949	-0.119073	-0.115487	0.0969629	0.0826064	-0.133876	-0.13373	-0.0996366	-0.102301
Mgst1	mRNA	Mgst1	non_specific	astrocyte		brain	brain					Y. Zhang, S.A. Sloan, L.E. Clarke, C. Caneda, C.A. Plaza, P.D. Blumenthal, et al., Purification and Characterization of Progenitor and Mature Human Astrocytes Reveals Transcriptional and Functional Differences with Mouse, Neuron. 89 (2016) 37-53. 10.1016/j.neuron.2015.11.013.	0.599199	0.135975	-0.0878698	-0.105537	-0.080749	0.0955248	-0.0771224	0.53973	-0.079482	-0.111114	-0.0897887	-0.109283	-0.100028	-0.102472	-0.101013	-0.0838701	-0.121568	-0.11069	-0.103016	-0.111769	-0.102898	-0.107033	-0.0928378	-0.105752	-0.0987913	-0.104519	0.800302	0.174398	-0.105441	-0.0896716	-0.0981391	-0.11325	0.286759	0.142564	-0.102899	-0.0965267	0.0803976
SLC14A1	mRNA	Slc14a1	non_specific	astrocyte		brain	brain					Y. Zhang, S.A. Sloan, L.E. Clarke, C. Caneda, C.A. Plaza, P.D. Blumenthal, et al., Purification and Characterization of Progenitor and Mature Human Astrocytes Reveals Transcriptional and Functional Differences with Mouse, Neuron. 89 (2016) 37-53. 10.1016/j.neuron.2015.11.013.	0.711752	-0.0866133	0.368921	-0.128265	-0.120006	0.144416	-0.122447	0.637894	-0.117888	-0.133066	-0.119128	-0.13418	-0.12306	-0.129354	-0.135519	0.342224	-0.134574	-0.131555	-0.124653	-0.13308	-0.123849	-0.130367	-0.090862	-0.133029	-0.132333	-0.119158	1.3976	-0.0291438	-0.116739	-0.117761	-0.112761	-0.131665	-0.135752	-0.0786308	-0.127755	-0.135063	-0.11231
Rgs20	mRNA	Rgs20	non_specific	astrocyte		brain	brain					Y. Zhang, S.A. Sloan, L.E. Clarke, C. Caneda, C.A. Plaza, P.D. Blumenthal, et al., Purification and Characterization of Progenitor and Mature Human Astrocytes Reveals Transcriptional and Functional Differences with Mouse, Neuron. 89 (2016) 37-53. 10.1016/j.neuron.2015.11.013.	1.03563	-0.432733	-0.447989	0.0621744	-0.440892	0.0750203	-0.442692	1.02774	-0.443004	0.0070197	-0.442387	0.0432218	0.234742	-0.0546031	-0.0654603	-0.42808	0.246766	0.353051	0.0492446	-0.00645675	-0.0150682	-0.0299344	0.711957	-0.116779	0.534357	-0.0011226	1.0872	-0.187198	0.35906	-0.345134	-0.112855	-0.317282	-0.375447	-0.382377	-0.0147658	0.133483	-0.380533
Stmn2	mRNA	Stmn2	Homo sapiens	neuron		brain	brain					Y. Zhang, S.A. Sloan, L.E. Clarke, C. Caneda, C.A. Plaza, P.D. Blumenthal, et al., Purification and Characterization of Progenitor and Mature Human Astrocytes Reveals Transcriptional and Functional Differences with Mouse, Neuron. 89 (2016) 37-53. 10.1016/j.neuron.2015.11.013.	-0.496115	-0.353053	-0.396866	0.486885	-0.445991	-0.38888	-0.420682	-0.503234	-0.451477	0.515709	-0.49328	0.516526	0.316755	0.472478	0.475218	-0.370436	0.36976	0.407922	0.492097	0.544665	0.434435	0.571571	-0.483611	0.481481	0.460338	0.42776	-0.447456	0.0812901	0.446781	-0.547365	0.500859	0.595771	-0.414093	-0.269275	0.579263	0.471641	-0.523542
Lgi1	mRNA	Lgi1	Mus musculus	astrocyte		brain	medial_amygdala					Y. Zhang, S.A. Sloan, L.E. Clarke, C. Caneda, C.A. Plaza, P.D. Blumenthal, et al., Purification and Characterization of Progenitor and Mature Human Astrocytes Reveals Transcriptional and Functional Differences with Mouse, Neuron. 89 (2016) 37-53. 10.1016/j.neuron.2015.11.013.	1.72185	-0.507682	-0.531155	-0.016279	-0.532716	-0.110677	-0.525388	1.7875	-0.539495	-0.100307	-0.543224	0.00245672	-0.0905849	0.400769	0.0591627	-0.502439	-0.235641	0.0451432	0.255275	-0.301714	0.128453	0.0263391	-0.244834	-0.0690444	-0.164862	0.0445034	1.69032	-0.232391	0.0699156	-0.529413	0.166638	-0.119282	-0.495656	-0.431698	-0.353464	0.0570134	0.673778
Lfng	mRNA	Lfng	Mus musculus	astrocyte		brain	medial_amygdala					Y. Zhang, S.A. Sloan, L.E. Clarke, C. Caneda, C.A. Plaza, P.D. Blumenthal, et al., Purification and Characterization of Progenitor and Mature Human Astrocytes Reveals Transcriptional and Functional Differences with Mouse, Neuron. 89 (2016) 37-53. 10.1016/j.neuron.2015.11.013.	1.08335	0.272379	-0.0073549	-0.161461	-0.147556	-0.049694	-0.143616	1.14311	-0.149959	-0.165278	-0.151268	-0.164813	-0.16966	-0.15953	-0.171579	-0.009271	-0.164511	-0.160909	-0.165469	-0.170384	-0.157728	-0.160722	-0.143667	-0.157294	-0.148829	-0.162168	0.736035	-0.0942913	-0.155975	-0.151548	-0.157392	-0.148199	0.0535702	0.253613	-0.175671	-0.154665	-0.0870479
Vps8	mRNA	Vps8	Mus musculus	neuron		brain	medial_amygdala					Y. Zhang, S.A. Sloan, L.E. Clarke, C. Caneda, C.A. Plaza, P.D. Blumenthal, et al., Purification and Characterization of Progenitor and Mature Human Astrocytes Reveals Transcriptional and Functional Differences with Mouse, Neuron. 89 (2016) 37-53. 10.1016/j.neuron.2015.11.013.	-0.40267	-0.601684	-0.277994	-0.226067	0.570714	-0.312819	0.362905	-0.400585	0.736393	-0.212875	0.917312	-0.237746	-0.15342	-0.276527	-0.26908	-0.274387	-0.273875	-0.175	-0.303624	-0.300363	-0.172826	-0.23348	-0.206855	-0.189012	-0.147773	-0.102512	-0.438732	-0.545705	-0.225962	0.332411	-0.153735	-0.304322	-0.514679	-0.562139	-0.274098	-0.132148	-0.395472
VGAT	mRNA	Slc32a1	Mus musculus	neuron	inhibitory_neuron	brain	medial_amygdala					Y. Zhang, S.A. Sloan, L.E. Clarke, C. Caneda, C.A. Plaza, P.D. Blumenthal, et al., Purification and Characterization of Progenitor and Mature Human Astrocytes Reveals Transcriptional and Functional Differences with Mouse, Neuron. 89 (2016) 37-53. 10.1016/j.neuron.2015.11.013.	-0.177892	-0.143636	-0.097745	0.144423	-0.116851	-0.144291	-0.0909516	-0.178108	-0.128164	0.447236	-0.163236	-0.188469	0.396585	0.700501	-0.242031	-0.0888868	0.5426	0.536329	-0.199529	0.125214	-0.226199	-0.221983	-0.163975	-0.223103	0.622851	-0.248252	-0.179145	0.0891642	0.452793	-0.183749	-0.254624	-0.21255	-0.129902	-0.15746	-0.252135	0.513391	-0.20537
Gpr17	mRNA	Gpr17	Mus musculus	oligodendrocyte	OPC	brain	medial_amygdala					Y. Zhang, S.A. Sloan, L.E. Clarke, C. Caneda, C.A. Plaza, P.D. Blumenthal, et al., Purification and Characterization of Progenitor and Mature Human Astrocytes Reveals Transcriptional and Functional Differences with Mouse, Neuron. 89 (2016) 37-53. 10.1016/j.neuron.2015.11.013.	-0.0786666	0.063738	-0.0746779	-0.0922505	-0.0661514	1.21464	-0.0666487	-0.0783443	-0.0797477	-0.0915768	-0.0784229	-0.0980622	-0.0891137	-0.0974293	-0.095876	-0.0758995	-0.0908957	-0.097957	-0.0841358	-0.085971	-0.0925814	-0.0962656	2.79708	-0.0886676	-0.0947345	-0.0934639	-0.0864327	-0.0773796	-0.0643138	1.95078	-0.0856592	-0.0985905	-0.0416552	0.036406	-0.0974994	-0.106282	-0.0635952
Gng13	mRNA	Gng13	Mus musculus	neuron		brain	medial_amygdala					Y. Zhang, S.A. Sloan, L.E. Clarke, C. Caneda, C.A. Plaza, P.D. Blumenthal, et al., Purification and Characterization of Progenitor and Mature Human Astrocytes Reveals Transcriptional and Functional Differences with Mouse, Neuron. 89 (2016) 37-53. 10.1016/j.neuron.2015.11.013.	-0.0820579	-0.00150695	-0.0477891	0.0611583	-0.0606608	-0.0274844	-0.0468685	-0.0765433	-0.0690929	0.137081	-0.0751928	0.130756	-0.0482786	0.144218	0.00986837	-0.0485832	0.0650966	-0.0189508	0.0462448	0.080216	0.0575109	0.0937854	-0.0694129	-0.0955882	-0.00724192	0.056331	-0.11823	0.191783	0.00769115	-0.116376	-0.0309725	0.0134443	0.0164221	0.0127932	0.0727764	-0.0156967	-0.0445932
Kcnt1	mRNA	Kcnt1	Mus musculus	astrocyte		brain	medial_amygdala					Y. Zhang, S.A. Sloan, L.E. Clarke, C. Caneda, C.A. Plaza, P.D. Blumenthal, et al., Purification and Characterization of Progenitor and Mature Human Astrocytes Reveals Transcriptional and Functional Differences with Mouse, Neuron. 89 (2016) 37-53. 10.1016/j.neuron.2015.11.013.	0.0698575	-0.562989	-0.593137	0.472011	-0.599311	-0.454772	-0.60051	0.0894689	-0.593656	0.635022	-0.602156	0.564444	0.234286	0.608295	0.322704	-0.558256	0.55714	0.340522	0.563838	0.402209	0.54962	0.490075	-0.544137	-0.0923607	0.215478	0.58561	0.00532494	0.0137639	0.319026	-0.601752	0.809874	0.779459	-0.469574	-0.520483	0.707998	0.675011	-0.497011
Camk2a	mRNA	Camk2a	Mus musculus	neuron		brain	medial_amygdala					Y. Zhang, S.A. Sloan, L.E. Clarke, C. Caneda, C.A. Plaza, P.D. Blumenthal, et al., Purification and Characterization of Progenitor and Mature Human Astrocytes Reveals Transcriptional and Functional Differences with Mouse, Neuron. 89 (2016) 37-53. 10.1016/j.neuron.2015.11.013.	-0.448246	-0.460217	-0.422942	0.497989	-0.477	-0.38338	-0.474259	-0.461887	-0.479153	-0.0978509	-0.481842	0.109306	1.19421	1.13598	0.984259	-0.410786	-0.0258593	1.00428	1.20221	-0.12253	0.471895	1.24272	-0.478483	1.48109	-0.404381	0.12263	-0.437376	-0.120763	0.700595	-0.470704	0.00722856	1.32627	-0.431905	-0.433829	0.622162	1.21942	-0.432078
Kif5c	mRNA	Kif5c	Mus musculus	neuron		brain	medial_amygdala					Y. Zhang, S.A. Sloan, L.E. Clarke, C. Caneda, C.A. Plaza, P.D. Blumenthal, et al., Purification and Characterization of Progenitor and Mature Human Astrocytes Reveals Transcriptional and Functional Differences with Mouse, Neuron. 89 (2016) 37-53. 10.1016/j.neuron.2015.11.013.	-0.630315	-0.620528	-0.710829	0.530247	-0.428284	-0.422713	-0.444046	-0.636074	-0.410422	0.61638	-0.403888	0.591517	0.319408	0.432259	0.464624	-0.678304	0.589505	0.429268	0.453353	0.582667	0.573566	0.500737	-0.257341	0.542197	0.553523	0.633731	-0.596606	-0.0868305	0.52805	-0.505541	0.932626	0.317514	-0.588734	-0.558244	0.669322	0.468971	-0.556346
Mef2c	mRNA	Mef2c	Mus musculus	microglia		CNS	brain					Y. Zhang, S.A. Sloan, L.E. Clarke, C. Caneda, C.A. Plaza, P.D. Blumenthal, et al., Purification and Characterization of Progenitor and Mature Human Astrocytes Reveals Transcriptional and Functional Differences with Mouse, Neuron. 89 (2016) 37-53. 10.1016/j.neuron.2015.11.013.	-0.249311	0.465574	2.81419	0.274267	-0.534703	-0.00380592	-0.560178	-0.261663	-0.534511	0.122938	-0.48679	0.263072	0.516905	0.267821	0.206992	2.75915	0.470819	0.687779	0.269369	0.122525	0.469387	0.150003	-0.329842	0.00236108	0.890485	0.42276	-0.166539	-0.117754	0.537122	-0.575145	-0.0197956	0.518847	-0.475154	0.480128	0.0368223	-0.152428	0.284744
Tyrobp	mRNA	Tyrobp	Mus musculus	microglia	phagocytic_microglia	CNS	brain					Y. Zhang, S.A. Sloan, L.E. Clarke, C. Caneda, C.A. Plaza, P.D. Blumenthal, et al., Purification and Characterization of Progenitor and Mature Human Astrocytes Reveals Transcriptional and Functional Differences with Mouse, Neuron. 89 (2016) 37-53. 10.1016/j.neuron.2015.11.013.	-0.0677238	-0.0470152	2.18027	-0.076232	-0.0607868	0.0301874	-0.0594083	-0.0669064	-0.0674731	-0.0750687	-0.0699774	-0.0818463	-0.0717573	-0.0698888	-0.0784864	2.08316	-0.0760441	-0.086153	-0.0918005	-0.0730804	-0.0695636	-0.0765575	-0.0759252	-0.0816946	-0.083978	-0.0797764	-0.0691247	-0.0392255	-0.0718662	-0.0707524	-0.0810624	-0.0838639	-0.0235203	0.057143	-0.0832552	-0.0772873	-0.0918005
Olfml3	mRNA	Olfml3	Mus musculus	microglia		CNS	brain					Y. Zhang, S.A. Sloan, L.E. Clarke, C. Caneda, C.A. Plaza, P.D. Blumenthal, et al., Purification and Characterization of Progenitor and Mature Human Astrocytes Reveals Transcriptional and Functional Differences with Mouse, Neuron. 89 (2016) 37-53. 10.1016/j.neuron.2015.11.013.	-0.0397282	-0.0363073	1.09441	-0.038452	-0.0743482	0.163824	-0.0760773	-0.0745593	-0.0755652	-0.0272357	-0.0778059	-0.0420259	-0.0464663	-0.0316078	-0.0425585	1.05219	-0.0395	-0.0268078	-0.0421381	-0.0483537	-0.0136037	-0.0646099	-0.0466564	-0.0469003	-0.0866588	-0.0396404	-0.0566617	-0.051747	-0.0288572	-0.0651278	-0.0647763	-0.0666266	0.98931	0.0312307	-0.0459172	-0.0270001	-0.0426272
NeuN	mRNA	Rbfox3	Mus musculus	neuron		CNS	brain					Y. Zhang, S.A. Sloan, L.E. Clarke, C. Caneda, C.A. Plaza, P.D. Blumenthal, et al., Purification and Characterization of Progenitor and Mature Human Astrocytes Reveals Transcriptional and Functional Differences with Mouse, Neuron. 89 (2016) 37-53. 10.1016/j.neuron.2015.11.013.	-0.669114	-0.612056	-0.664568	0.723382	-0.680535	-0.575505	-0.67943	-0.670638	-0.674938	0.778549	-0.688007	0.954908	0.484436	1.34608	0.800052	-0.637378	0.11702	0.929471	0.923702	0.263708	0.944818	0.826379	-0.660349	0.0115561	-0.0149332	0.598115	-0.643638	0.0963718	0.644819	-0.704506	1.51286	1.37736	-0.663424	-0.586743	0.339937	1.01457	-0.657472
Tubb3	mRNA	Tubb3	Mus musculus	neuron		CNS	brain					Y. Zhang, S.A. Sloan, L.E. Clarke, C. Caneda, C.A. Plaza, P.D. Blumenthal, et al., Purification and Characterization of Progenitor and Mature Human Astrocytes Reveals Transcriptional and Functional Differences with Mouse, Neuron. 89 (2016) 37-53. 10.1016/j.neuron.2015.11.013.	-0.427956	-0.425241	-0.33224	0.144504	0.0222353	-0.293916	-0.0843945	-0.428456	0.106309	0.303428	0.228675	0.157359	-0.0940214	0.137227	-0.0352917	-0.317629	0.201784	-0.0224925	0.00562461	0.206935	0.0837227	0.201316	-0.236662	0.0341014	-0.00942518	0.227028	-0.412865	-0.074362	0.0344393	-0.345617	0.469498	0.0265403	-0.388182	-0.385977	0.392726	0.305725	-0.436894
Prdx6	mRNA	Prdx6	Mus musculus	ependymal	tanycyte	brain	brain					F. Langlet, Tanycyte Gene Expression Dynamics in the Regulation of Energy Homeostasis, Front Endocrinol (Lausanne). 10 (2019) 286. 10.3389/fendo.2019.00286.	1.34218	-0.224181	-0.292177	-0.16491	-0.204677	-0.0561663	-0.207169	1.35763	-0.204011	-0.147793	-0.204327	-0.16227	-0.257055	-0.134345	-0.220626	-0.280922	-0.120438	-0.254056	-0.2191	-0.131174	-0.181197	-0.123635	-0.119045	-0.167428	-0.218845	-0.123759	1.31711	-0.0997821	-0.224336	-0.188465	-0.146103	-0.124507	-0.166775	-0.136036	-0.0220031	0.155065	-0.127465
Vegfa	mRNA	Vegfa	Mus musculus	ependymal	fasting_tanycyte	brain	hypothalamus					F. Langlet, Tanycyte Gene Expression Dynamics in the Regulation of Energy Homeostasis, Front Endocrinol (Lausanne). 10 (2019) 286. 10.3389/fendo.2019.00286.	1.2586	-0.464839	-0.475493	-0.0646479	-0.351097	0.201157	-0.300341	1.43469	-0.39605	0.0151731	-0.459345	-0.149076	0.00280876	-0.0931187	-0.287809	-0.443855	0.0796091	-0.103401	-0.211438	0.0175137	-0.100497	-0.0170938	0.652484	-0.259665	-0.0248257	-0.0252663	0.155089	-0.197615	-0.0819937	0.0528297	0.0976881	0.0354738	-0.0748957	-0.415512	0.203416	0.0697099	0.561836
Hif1a	mRNA	Hif1a	Mus musculus	ependymal	fasting_tanycyte	brain	hypothalamus					F. Langlet, Tanycyte Gene Expression Dynamics in the Regulation of Energy Homeostasis, Front Endocrinol (Lausanne). 10 (2019) 286. 10.3389/fendo.2019.00286.	0.591616	0.0528656	0.0837143	-0.0675912	-0.134634	0.0809884	-0.14057	0.675417	-0.122358	-0.0534281	-0.15222	-0.0762641	-0.0768337	-0.159606	-0.0862616	0.0844103	-0.0759951	-0.150278	-0.0938092	0.00947887	-0.0255883	-0.0935805	0.118893	0.141586	-0.0700274	-0.0646858	0.123193	-0.252585	-0.0527158	0.0663949	-0.118491	-0.0876327	0.131437	0.0304193	-0.0931786	-0.112076	0.384543
Crym	mRNA	Crym	Mus musculus	ependymal	alpha_tanycyte	brain	brain					F. Langlet, Tanycyte Gene Expression Dynamics in the Regulation of Energy Homeostasis, Front Endocrinol (Lausanne). 10 (2019) 286. 10.3389/fendo.2019.00286.	-0.0454701	-0.0663365	-0.0577255	0.0221524	-0.0619194	-0.0472198	-0.0601828	-0.0438213	-0.0639947	-0.0409759	-0.0630735	-0.0540487	0.76077	-0.0628205	-0.0388684	-0.0580583	-0.0241128	-0.0301094	-0.0399776	-0.0663365	-0.061262	-0.0103368	-0.0607223	-0.0605446	0.22848	-0.0288004	-0.0511992	-0.0567404	0.310137	-0.0663365	-0.0663365	-0.0517259	-0.0161929	-0.0663365	-0.0663365	-0.0663365	-0.0512672
Col25a1	mRNA	Col25a1	Mus musculus	ependymal	beta_tanycyte	brain	brain					F. Langlet, Tanycyte Gene Expression Dynamics in the Regulation of Energy Homeostasis, Front Endocrinol (Lausanne). 10 (2019) 286. 10.3389/fendo.2019.00286.	-0.361278	-0.331327	-0.278002	0.374721	-0.355441	-0.277029	-0.350627	-0.36187	-0.360471	0.320043	-0.359749	0.316047	1.28827	0.886387	0.325296	-0.272475	-0.100033	1.21588	0.237477	0.0242464	0.453886	0.651509	-0.342653	0.109955	-0.237181	0.286858	-0.356201	-0.0457622	0.854724	-0.357108	-0.310995	-0.0924559	-0.182872	-0.308816	-0.308981	0.101079	-0.365446
Sprr1a	mRNA	Sprr1a	non_specific	ependymal	tanycyte	brain	infundibular_recess					F. Langlet, Tanycyte Gene Expression Dynamics in the Regulation of Energy Homeostasis, Front Endocrinol (Lausanne). 10 (2019) 286. 10.3389/fendo.2019.00286.	-0.00705268	-0.00705268	-0.00705268	-0.00579614	-0.00705268	-0.00705268	-0.00705268	-0.00705268	-0.00705268	-0.00585709	-0.00705268	-0.00705268	-0.00705268	-0.00705268	-0.00328212	-0.00705268	-0.00705268	-0.00705268	0.00704838	-0.00705268	-0.00705268	-0.00705268	-0.00705268	-0.00705268	-0.00705268	-0.00705268	-0.00705268	0.00248693	-0.00705268	-0.00705268	-0.00705268	-0.00705268	-0.00705268	-0.00705268	-0.00705268	-0.00705268	-0.00705268
Vcan	mRNA	Vcan	Mus musculus	ependymal	alpha_tanycyte	brain	brain					F. Langlet, Tanycyte Gene Expression Dynamics in the Regulation of Energy Homeostasis, Front Endocrinol (Lausanne). 10 (2019) 286. 10.3389/fendo.2019.00286.	0.0148676	-0.242889	-0.248345	-0.0311318	-0.241868	1.76525	-0.242021	-0.0078429	-0.239929	-0.035101	-0.248238	0.0536472	-0.160692	-0.196803	-0.18126	-0.243095	0.320461	-0.143259	-0.0224843	0.286082	0.0803622	0.102065	5.10022	-0.0892382	-0.191404	0.0143996	0.23943	-0.171718	-0.211103	0.844083	-0.197361	-0.262482	-0.142643	-0.221085	0.143341	-0.181547	-0.120389
Fgfr1	mRNA	Fgfr1	Mus musculus	ependymal	beta_tanycyte	brain	brain					F. Langlet, Tanycyte Gene Expression Dynamics in the Regulation of Energy Homeostasis, Front Endocrinol (Lausanne). 10 (2019) 286. 10.3389/fendo.2019.00286.	0.406022	-0.377965	-0.447632	0.184701	-0.419629	0.205683	-0.448212	0.359546	-0.43476	0.21336	-0.323295	0.279288	-0.214873	0.435922	0.270879	-0.429996	0.0889443	0.233464	0.172644	-0.0189548	0.23634	0.126723	-0.249819	0.391464	-0.0997068	0.101158	0.565093	-0.0376207	0.314011	-0.463564	1.03093	0.0941812	1.36329	-0.314245	-0.200026	0.220727	0.709163
Adm	mRNA	Adm	Mus musculus	ependymal	beta_tanycyte	brain	brain					F. Langlet, Tanycyte Gene Expression Dynamics in the Regulation of Energy Homeostasis, Front Endocrinol (Lausanne). 10 (2019) 286. 10.3389/fendo.2019.00286.	0.143874	0.0657679	-0.0618199	-0.0306162	-0.0663176	0.0652464	-0.065784	0.175312	-0.0670084	0.0214815	-0.0644283	-0.0388471	-0.0648596	0.00583324	-0.0766817	-0.0539507	-0.0628808	-0.0552479	-0.0657912	-0.0553193	-0.0434885	-0.0377799	0.132508	-0.0678402	-0.0799789	-0.0350341	-0.0606396	-0.0199853	-0.0637049	-0.0558601	0.047344	-0.0237862	0.265605	0.0431518	0.0732497	0.0801013	-0.0542948
Caveolin_1	mRNA	Cav1	Mus musculus	ependymal	beta_tanycyte	brain	brain					F. Langlet, Tanycyte Gene Expression Dynamics in the Regulation of Energy Homeostasis, Front Endocrinol (Lausanne). 10 (2019) 286. 10.3389/fendo.2019.00286.	-0.086715	2.77704	-0.0870861	-0.0863107	-0.011454	0.571846	-0.0313421	-0.0950073	-0.0685242	-0.0914024	0.119309	-0.0920366	-0.0943656	-0.0945893	-0.0892803	-0.0877913	-0.0964631	-0.0856338	-0.0795907	-0.09998	-0.05308	-0.0953536	1.39412	-0.0987757	-0.085884	-0.0973328	-0.0489715	-0.0687906	-0.0924441	0.0760823	-0.0956434	-0.093127	0.311148	2.69153	-0.092726	-0.0922605	-0.0695645
Slc16a4	mRNA	Slc16a4	Mus musculus	ependymal	alpha_tanycyte	brain	brain				close_neurons	F. Langlet, Tanycyte Gene Expression Dynamics in the Regulation of Energy Homeostasis, Front Endocrinol (Lausanne). 10 (2019) 286. 10.3389/fendo.2019.00286.	0.0643572	0.540075	-0.292723	0.123708	-0.184788	-0.0729962	-0.209576	0.0621039	-0.180964	0.121199	-0.11988	0.111127	0.165606	0.00747812	0.139439	-0.266604	0.201451	0.1925	0.168353	0.175491	0.112343	0.0719368	-0.132366	0.163717	0.195704	0.206215	0.0532212	-0.106167	0.242375	-0.176573	0.0857292	-0.0393266	-0.171336	0.415027	-0.0277841	0.0925491	0.318464
Cd59a	mRNA	Cd59a	Mus musculus	ependymal	alpha_tanycyte	brain	brain					F. Langlet, Tanycyte Gene Expression Dynamics in the Regulation of Energy Homeostasis, Front Endocrinol (Lausanne). 10 (2019) 286. 10.3389/fendo.2019.00286.	-0.145293	1.17234	-0.168856	0.0683017	-0.05902	-0.00802808	-0.163188	-0.151656	-0.0918952	0.102604	0.269726	0.117323	0.0045	-0.0846224	0.0366194	-0.160299	0.0719399	-0.00505211	-0.0552713	0.145375	0.0133183	0.0443855	-0.159662	0.115108	0.0892882	0.0771957	-0.105412	-0.0750638	0.0233729	-0.174907	0.208253	0.104502	-0.074577	1.0044	0.284733	0.12693	0.627397
Ocln	mRNA	Ocln	Mus musculus	ependymal	fasting_tanycyte	brain	hypothalamus					F. Langlet, Tanycyte Gene Expression Dynamics in the Regulation of Energy Homeostasis, Front Endocrinol (Lausanne). 10 (2019) 286. 10.3389/fendo.2019.00286.	-0.00354786	3.93281	-0.0673684	-0.0548876	-0.0973988	0.496359	-0.100073	-0.0143572	-0.0956212	-0.0890822	-0.100515	-0.0780787	-0.0986727	-0.0901632	-0.074019	-0.0690611	-0.0332631	-0.0732126	-0.00246849	-0.0841215	-0.0817676	-0.0766624	0.0626571	-0.0294187	1.39902e-05	0.0231759	-0.0673829	-0.0438403	0.161299	-0.106148	0.098319	-0.0427391	0.376902	3.24323	-0.0875075	-0.0948479	2.49044
Ppp1r1b	mRNA	Ppp1r1b	Mus musculus	ependymal	tanycyte	brain	brain	vagliocyte				F. Langlet, Tanycyte Gene Expression Dynamics in the Regulation of Energy Homeostasis, Front Endocrinol (Lausanne). 10 (2019) 286. 10.3389/fendo.2019.00286.	0.291979	-0.0513214	-0.0743588	-0.0775011	-0.0712149	0.374041	-0.0663346	0.289893	-0.071701	-0.0654472	-0.085387	-0.0832185	-0.0780697	-0.0709396	-0.0908691	-0.0721261	-0.0679559	-0.102513	-0.0714224	-0.0815321	-0.0926766	-0.0849179	-0.0969687	-0.0949164	-0.101789	-0.051474	0.365131	-0.0257316	-0.0428538	-0.0750688	-0.0785314	-0.0967726	-0.0589764	-0.012612	-0.0693786	-0.0791141	3.52261
Slc16a2	mRNA	Slc16a2	Mus musculus	ependymal	tanycyte	brain	brain					F. Langlet, Tanycyte Gene Expression Dynamics in the Regulation of Energy Homeostasis, Front Endocrinol (Lausanne). 10 (2019) 286. 10.3389/fendo.2019.00286.	-0.152851	2.16886	-0.2684	0.107532	-0.249979	0.708886	-0.25749	-0.221771	-0.258929	-0.143552	-0.22632	-0.0230661	0.631762	-0.116032	0.568843	-0.26331	-0.0918921	0.630175	0.434475	-0.0589072	0.0881839	0.0385768	0.250165	0.78368	-0.0134989	-0.124026	0.223879	-0.0927486	0.160836	-0.21538	-0.254998	-0.0978239	0.384128	1.76394	-0.274628	-0.106804	4.97639
Claudin1	mRNA	Cldn1	Mus musculus	ependymal	beta_tanycyte	brain	brain	fasting_tanycyte			fenestrated_capillaries	F. Langlet, Tanycyte Gene Expression Dynamics in the Regulation of Energy Homeostasis, Front Endocrinol (Lausanne). 10 (2019) 286. 10.3389/fendo.2019.00286.	-0.048987	-0.0576739	-0.0404665	-0.0144036	-0.0519996	0.188874	-0.0521402	-0.0515386	-0.0518243	-0.031721	-0.0560438	-0.0046627	-0.0484969	0.0658856	-0.0358198	-0.0411316	-0.0509958	-0.0290283	0.0186397	-0.0292158	-0.00646978	-0.0340366	-0.0409166	-0.0518869	-0.0508597	-0.0576739	-0.0501117	-0.0193224	-0.0272009	-0.0576739	0.00422147	0.300981	0.105153	-0.0450068	-0.0410215	0.0502002	1.766
Fgf10	mRNA	Fgf10	Mus musculus	ependymal	beta_tanycyte	brain	brain					F. Langlet, Tanycyte Gene Expression Dynamics in the Regulation of Energy Homeostasis, Front Endocrinol (Lausanne). 10 (2019) 286. 10.3389/fendo.2019.00286.	-0.155891	-0.207236	-0.229238	0.226786	-0.230962	-0.181461	-0.229747	-0.151241	-0.229329	0.211871	-0.23407	0.0778588	-0.089512	0.62682	0.249271	-0.215192	0.193712	0.13282	0.237972	-0.0834446	0.251657	0.867258	-0.186373	0.0883254	0.0167318	0.411871	-0.183173	-0.0389715	0.290605	-0.231205	-0.149785	0.191038	-0.197672	-0.201858	0.875614	-0.0261158	-0.207429
Lhx2	mRNA	Lhx2	Mus musculus	ependymal	tanycyte	brain	brain					F. Langlet, Tanycyte Gene Expression Dynamics in the Regulation of Energy Homeostasis, Front Endocrinol (Lausanne). 10 (2019) 286. 10.3389/fendo.2019.00286.	-0.107758	-0.126973	-0.113978	0.108126	-0.113083	-0.0891767	-0.108567	-0.106319	-0.119045	-0.104671	-0.114995	-0.0293607	-0.12162	-0.111175	-0.0636584	-0.108534	-0.115368	-0.115973	0.202522	-0.0132519	-0.0467565	2.17521	-0.115677	-0.100227	-0.119396	0.0549467	-0.126973	-0.0980109	-0.123793	-0.116886	-0.101894	-0.116245	-0.091889	-0.126973	3.12509	-0.126973	-0.0986925
Rax	mRNA	Rax	Mus musculus	ependymal	tanycyte	brain	brain					F. Langlet, Tanycyte Gene Expression Dynamics in the Regulation of Energy Homeostasis, Front Endocrinol (Lausanne). 10 (2019) 286. 10.3389/fendo.2019.00286.	0.0127343	-0.0218896	-0.0218896	-0.0201235	-0.0215755	-0.0128266	-0.021277	0.00052616	-0.0218896	-0.0209808	-0.0218896	-0.0218896	-0.0186421	-0.0152186	-0.0218896	-0.0177688	-0.0218896	-0.0218896	-0.0218896	-0.0218896	-0.016626	-0.0166792	-0.0218896	-0.0218896	-0.0218896	-0.00903966	0.0383924	-0.0123359	-0.0218896	-0.0218896	-0.0218896	-0.0218896	-0.0218896	-0.0218896	-0.0218896	-0.0218896	0.00811604
Musashi1	mRNA	Msi1	Mus musculus	ependymal	beta_tanycyte	brain	brain					F. Langlet, Tanycyte Gene Expression Dynamics in the Regulation of Energy Homeostasis, Front Endocrinol (Lausanne). 10 (2019) 286. 10.3389/fendo.2019.00286.	1.11465	-0.308007	-0.307131	-0.0658991	-0.304102	0.15385	-0.304238	1.09659	-0.305448	-0.0873905	-0.302438	-0.101605	-0.0676761	-0.114066	-0.0263323	-0.290634	-0.0332747	-0.063957	-0.0357806	-0.0490162	-0.0944229	-0.0224386	0.0877182	0.105913	-0.0436574	-0.0699395	1.11719	-0.158284	-0.022931	-0.300863	-0.134888	-0.113595	-0.197178	-0.24482	-0.0175856	-0.0711024	1.04163
Cntfr	mRNA	Cntfr	Mus musculus	ependymal	beta_tanycyte	brain	brain					F. Langlet, Tanycyte Gene Expression Dynamics in the Regulation of Energy Homeostasis, Front Endocrinol (Lausanne). 10 (2019) 286. 10.3389/fendo.2019.00286.	0.870913	-0.398719	-0.390334	-0.0437635	-0.192599	-0.125364	-0.122761	0.893025	-0.244781	0.00880927	-0.383042	-0.0530708	-0.0597578	-0.136324	-0.123898	-0.366358	0.0577646	-0.0609537	-0.0912669	0.0584343	-0.031445	-0.0869117	-0.0235193	-0.0158678	-0.0937796	0.00216363	0.600107	-0.102551	-0.0516267	0.257634	0.202781	-0.238622	-0.085792	-0.346453	-0.210967	-0.170683	-0.373357
N_cadherin	mRNA	Cdh2	Mus musculus	ependymal	beta_tanycyte	brain	brain				fenestrated_capillaries	F. Langlet, Tanycyte Gene Expression Dynamics in the Regulation of Energy Homeostasis, Front Endocrinol (Lausanne). 10 (2019) 286. 10.3389/fendo.2019.00286.	0.388794	-0.823221	-1.12602	0.0654718	-0.053765	-0.503363	-0.224725	0.443703	-0.00368125	0.0559249	0.340476	0.0630858	-0.00264044	0.0617368	0.196107	-1.08534	-0.00602556	0.119463	0.120535	0.00366157	0.0602784	0.21574	-0.274395	0.170549	-0.251701	0.0890445	0.0303838	-0.499762	-0.0162502	-0.188563	0.106258	-0.0714404	-1.06682	-0.777103	0.401726	0.095054	-0.945485
Cacna2d2	mRNA	Cacna2d2	Mus musculus	ependymal	beta_tanycyte	brain	brain					F. Langlet, Tanycyte Gene Expression Dynamics in the Regulation of Energy Homeostasis, Front Endocrinol (Lausanne). 10 (2019) 286. 10.3389/fendo.2019.00286.	-0.376696	-0.552496	-0.594488	0.569631	-0.59349	-0.397511	-0.588962	-0.370584	-0.595732	0.722483	-0.599762	0.498602	0.850983	0.720926	0.405427	-0.558963	0.977607	0.172884	0.369231	0.946766	0.494862	0.449467	-0.360799	0.435878	0.759439	0.73036	-0.403438	-0.11159	0.533073	-0.609559	0.173405	0.437095	-0.554296	-0.524658	-0.00602206	0.548126	-0.364728
Fgf18	mRNA	Fgf18	Mus musculus	ependymal	alpha_tanycyte	brain	brain					F. Langlet, Tanycyte Gene Expression Dynamics in the Regulation of Energy Homeostasis, Front Endocrinol (Lausanne). 10 (2019) 286. 10.3389/fendo.2019.00286.	-0.100123	-0.124451	-0.128173	0.109192	-0.129433	-0.0342319	-0.128981	-0.113348	-0.132164	0.30651	-0.126696	0.0803589	-0.0822203	0.033951	-0.0743508	-0.119564	0.249901	-0.016093	-0.024314	0.313422	-0.0233441	0.0866809	-0.0820332	-0.114732	0.249363	0.308692	-0.0420615	-0.103533	0.0261737	-0.141186	0.338697	-0.109004	-0.0841033	-0.117184	0.0904417	0.330565	0.420323
Prss56	mRNA	Prss56	Mus musculus	ependymal	alpha_tanycyte	brain	brain					F. Langlet, Tanycyte Gene Expression Dynamics in the Regulation of Energy Homeostasis, Front Endocrinol (Lausanne). 10 (2019) 286. 10.3389/fendo.2019.00286.	-0.0481912	-0.0490592	-0.0490592	0.00808695	-0.0462245	-0.0426362	-0.0459876	-0.0480375	-0.0467214	0.0206377	-0.0458018	0.0276113	0.012384	0.0709531	-0.0149817	-0.0490592	-0.025126	0.043573	-0.0207387	-0.032138	-0.0139982	0.0177612	-0.0490592	-0.0085854	-0.0218259	0.00553273	-0.0490592	-0.0394795	0.000836853	-0.0490592	0.0270876	-0.038414	-0.0490592	-0.0364029	-0.0490592	0.0199344	-0.0189722
Sparcl1	mRNA	Sparcl1	Mus musculus	ependymal		brain	midbrain			yes		O. Uriarte Huarte, D. Kyriakis, T. Heurtaux, Y. Pires-Afonso, K. Grzyb, R. Halder, et al., Single-Cell Transcriptomics and In Situ Morphological Analyses Reveal Microglia Heterogeneity Across the Nigrostriatal Pathway, Front Immunol. 12 (2021) 639613. 10.3389/fimmu.2021.639613.	1.9441	0.925596	-0.379532	-0.177887	-0.445788	0.0977874	-0.426332	1.94202	-0.451967	-0.0704343	-0.484996	-0.208693	-0.300373	0.0617228	-0.384937	-0.357126	-0.135416	-0.337675	-0.340672	-0.190343	-0.161189	-0.116131	0.0902948	-0.462033	-0.241586	-0.195691	2.08797	-0.0597283	-0.340398	-0.459458	-0.0382343	0.144364	-0.181067	0.976447	0.128361	0.182705	-0.426768
Xpr1	mRNA	Xpr1	Mus musculus	astrocyte		brain	midbrain			yes		O. Uriarte Huarte, D. Kyriakis, T. Heurtaux, Y. Pires-Afonso, K. Grzyb, R. Halder, et al., Single-Cell Transcriptomics and In Situ Morphological Analyses Reveal Microglia Heterogeneity Across the Nigrostriatal Pathway, Front Immunol. 12 (2021) 639613. 10.3389/fimmu.2021.639613.	0.354476	-0.136358	-0.020845	0.202878	-0.42995	0.00913066	-0.433686	0.390971	-0.409821	0.280873	-0.478943	0.247455	0.0438654	0.112226	0.215701	-0.0190697	0.189642	0.190022	0.0904174	0.227916	0.226746	0.217742	0.166283	0.318558	0.158569	0.223553	0.151122	-0.29177	0.149818	0.0272537	0.549462	0.119079	-0.318502	-0.156046	0.31963	0.147545	0.248798
Scn7a	mRNA	Scn7a	Mus musculus	neuron		brain	midbrain_nigrostriatum			yes		O. Uriarte Huarte, D. Kyriakis, T. Heurtaux, Y. Pires-Afonso, K. Grzyb, R. Halder, et al., Single-Cell Transcriptomics and In Situ Morphological Analyses Reveal Microglia Heterogeneity Across the Nigrostriatal Pathway, Front Immunol. 12 (2021) 639613. 10.3389/fimmu.2021.639613.	-0.185964	-0.206814	-0.173048	0.171931	-0.18924	0.0793117	-0.188298	-0.187667	-0.191321	0.231205	-0.191513	0.206501	-0.073235	0.311532	0.264968	-0.162425	0.0308694	0.300979	0.245919	0.186862	0.400847	-0.00977503	-0.181322	0.0973213	0.025994	-0.0814308	-0.183114	-0.0711885	0.419498	-0.183183	-0.0198857	0.497995	1.33461	-0.162487	-0.0274465	-0.0209892	-0.169433
Vwa1	mRNA	Vwa1	Mus musculus	astrocyte		brain	midbrain			yes		O. Uriarte Huarte, D. Kyriakis, T. Heurtaux, Y. Pires-Afonso, K. Grzyb, R. Halder, et al., Single-Cell Transcriptomics and In Situ Morphological Analyses Reveal Microglia Heterogeneity Across the Nigrostriatal Pathway, Front Immunol. 12 (2021) 639613. 10.3389/fimmu.2021.639613.	0.433094	3.37724	-0.125005	-0.0621737	-0.131506	0.0677743	-0.132956	0.453479	-0.134612	-0.0634268	-0.13232	-0.0495482	-0.0333597	-0.0796663	-0.0668778	-0.115197	-0.0687596	-0.0314626	-0.0801083	-0.06197	-0.0911266	-0.0770444	-0.0527056	-0.0397383	-0.0521431	-0.0521469	0.342196	-0.0636488	0.0147952	-0.0714506	-0.0877639	-0.13578	0.609007	2.74862	-0.10932	-0.121691	-0.0272209
Atp5f1	mRNA	Atp5f1	Mus musculus	ependymal		brain	midbrain			yes		O. Uriarte Huarte, D. Kyriakis, T. Heurtaux, Y. Pires-Afonso, K. Grzyb, R. Halder, et al., Single-Cell Transcriptomics and In Situ Morphological Analyses Reveal Microglia Heterogeneity Across the Nigrostriatal Pathway, Front Immunol. 12 (2021) 639613. 10.3389/fimmu.2021.639613.	0.0467845	0.19292	0.0351546	0.0156968	-0.0424659	-0.0245889	-0.0485621	0.0559	-0.0197134	0.0770136	-0.0515905	0.0300975	-0.0391561	0.0354933	-0.0564972	0.0286311	0.0749936	-0.0414776	-0.0734562	0.064232	-0.0125619	-0.0024189	-0.134939	-0.112544	0.0339825	0.085959	-0.033012	0.0558426	-0.0161664	-0.100843	0.103791	-0.0739157	0.0652786	0.231355	0.0872038	0.0765622	0.0510372
H2_T3	mRNA	H2-T3	Mus musculus	astrocyte		brain	midbrain			yes		O. Uriarte Huarte, D. Kyriakis, T. Heurtaux, Y. Pires-Afonso, K. Grzyb, R. Halder, et al., Single-Cell Transcriptomics and In Situ Morphological Analyses Reveal Microglia Heterogeneity Across the Nigrostriatal Pathway, Front Immunol. 12 (2021) 639613. 10.3389/fimmu.2021.639613.	-0.0140116	-0.016607	-0.016607	-0.0103183	-0.016607	-0.0129837	-0.016607	-0.0135519	-0.016607	-0.0082299	-0.016607	-0.013293	-0.0133612	-0.00960971	-0.0128328	-0.0124883	-0.00829101	-0.012341	-0.016607	-0.00688685	-0.0113462	-0.0111214	-0.016607	-0.016607	-0.00982068	-0.00238896	-0.016607	-0.016607	-0.016607	-0.016607	-0.016607	-0.016607	-0.00413301	-0.016607	-0.016607	0.0543321	-0.00161207
Ttr	mRNA	Ttr	Mus musculus	glial		brain	striatum					O. Uriarte Huarte, D. Kyriakis, T. Heurtaux, Y. Pires-Afonso, K. Grzyb, R. Halder, et al., Single-Cell Transcriptomics and In Situ Morphological Analyses Reveal Microglia Heterogeneity Across the Nigrostriatal Pathway, Front Immunol. 12 (2021) 639613. 10.3389/fimmu.2021.639613.	0.0841133	0.476316	0.163716	-0.188444	0.0987859	0.761002	0.151104	0.0718016	0.060635	-0.236931	0.0281698	-0.219636	-0.144808	-0.188663	-0.168484	0.14762	-0.186147	-0.180113	-0.166798	-0.165304	-0.219211	-0.182634	0.0504186	-0.167917	-0.107737	-0.222258	0.114103	0.294022	-0.11612	-0.0458881	-0.292083	-0.243712	0.247348	0.634474	-0.220464	-0.211247	5.28684
Ccdc153	mRNA	Ccdc153	Mus musculus	ependymal		brain	midbrain_nigrostriatum			yes		O. Uriarte Huarte, D. Kyriakis, T. Heurtaux, Y. Pires-Afonso, K. Grzyb, R. Halder, et al., Single-Cell Transcriptomics and In Situ Morphological Analyses Reveal Microglia Heterogeneity Across the Nigrostriatal Pathway, Front Immunol. 12 (2021) 639613. 10.3389/fimmu.2021.639613.	-0.0309429	-0.0592049	-0.0505999	-0.0449791	-0.0374501	0.303065	-0.0407567	-0.0369044	-0.0334631	-0.047214	-0.0396408	-0.0482772	-0.0452557	-0.0386385	-0.0453789	-0.0467963	-0.0505911	-0.0472673	-0.0557143	-0.0387337	-0.0550628	-0.0407917	-0.019933	-0.0417115	-0.0423523	-0.0467462	-0.0292831	0.0228354	-0.0592049	-0.00910925	-0.0554277	-0.0337692	-0.0475503	-0.0465359	-0.0337349	-0.039161	-0.0441462
Tmem212	mRNA	Tmem212	Mus musculus	ependymal		brain	midbrain_nigrostriatum			yes		O. Uriarte Huarte, D. Kyriakis, T. Heurtaux, Y. Pires-Afonso, K. Grzyb, R. Halder, et al., Single-Cell Transcriptomics and In Situ Morphological Analyses Reveal Microglia Heterogeneity Across the Nigrostriatal Pathway, Front Immunol. 12 (2021) 639613. 10.3389/fimmu.2021.639613.	-0.0386003	-0.0625714	-0.0534173	-0.0619143	-0.0461543	0.605371	-0.0519185	-0.0422514	-0.040981	-0.0594283	-0.0456883	-0.0640374	-0.0577672	-0.0658919	-0.0606063	-0.049908	-0.0690868	-0.0698818	-0.0697969	-0.0741812	-0.0664184	-0.050843	-0.0396518	-0.0645567	-0.0566638	-0.0587973	-0.0363706	-0.0181413	-0.056743	-0.0556107	-0.0401766	-0.0708513	-0.0666518	-0.0133171	-0.0657857	-0.0593919	-0.0792037
Dynlrb2	mRNA	Dynlrb2	Mus musculus	ependymal		brain	brain			yes		O. Uriarte Huarte, D. Kyriakis, T. Heurtaux, Y. Pires-Afonso, K. Grzyb, R. Halder, et al., Single-Cell Transcriptomics and In Situ Morphological Analyses Reveal Microglia Heterogeneity Across the Nigrostriatal Pathway, Front Immunol. 12 (2021) 639613. 10.3389/fimmu.2021.639613.	-0.00362935	-0.0680241	-0.0594116	-0.0500611	-0.0415747	0.353126	-0.0413341	-0.0162844	-0.0524167	-0.0534342	-0.0349692	-0.0615597	-0.0500199	-0.0613226	-0.0574929	-0.0556047	-0.0549528	-0.0637362	-0.0472743	-0.055053	-0.0390543	-0.0492619	-0.0567937	-0.0125482	-0.06327	-0.0463025	0.029242	-0.0296332	-0.0500424	-0.0379404	0.0507725	-0.0680241	-0.0554861	-0.0426638	-0.0426154	-0.0523427	0.954955
Rsph4a	mRNA	Rsph4a	Mus musculus	ependymal		brain	midbrain_nigrostriatum			yes		O. Uriarte Huarte, D. Kyriakis, T. Heurtaux, Y. Pires-Afonso, K. Grzyb, R. Halder, et al., Single-Cell Transcriptomics and In Situ Morphological Analyses Reveal Microglia Heterogeneity Across the Nigrostriatal Pathway, Front Immunol. 12 (2021) 639613. 10.3389/fimmu.2021.639613.	-0.0502283	-0.0663902	-0.0700909	-0.0122898	-0.0617205	0.308619	-0.0646383	-0.0574198	-0.0608859	-0.0411972	-0.0582104	-0.0318512	0.0208806	-0.0653831	0.0528125	-0.0632071	-0.0385083	0.0259326	0.044242	-0.0409711	0.03318	0.000575892	-0.061402	0.207183	-0.0635353	-0.0333905	-0.0467359	-0.0734169	-0.0391832	-0.0734182	-0.0400191	-0.057236	-0.0579155	-0.0703299	-0.0482378	-0.0661506	0.809541
Car9	mRNA	Car9	Mus musculus	ependymal		brain	midbrain			yes		O. Uriarte Huarte, D. Kyriakis, T. Heurtaux, Y. Pires-Afonso, K. Grzyb, R. Halder, et al., Single-Cell Transcriptomics and In Situ Morphological Analyses Reveal Microglia Heterogeneity Across the Nigrostriatal Pathway, Front Immunol. 12 (2021) 639613. 10.3389/fimmu.2021.639613.	-0.026247	-0.0279793	-0.0236901	-0.0159922	-0.0257791	0.0355004	-0.0249141	-0.0259402	-0.0279793	-0.0143728	-0.0247287	-0.0108435	-0.0182307	-0.00386614	-0.0242008	-0.0238559	-0.0154911	-0.0279793	-0.0232691	-0.0279793	-0.0176947	-0.0279793	-0.0223864	-0.0279793	-0.0279793	0.00181008	-0.0279793	-0.0184197	-0.0279793	-0.0279793	0.0140551	-0.00673355	-0.0154911	-0.0279793	-0.0279793	-0.022829	-0.0279793
Fam81b	mRNA	Fam81b	Mus musculus	ependymal		brain	midbrain			yes		O. Uriarte Huarte, D. Kyriakis, T. Heurtaux, Y. Pires-Afonso, K. Grzyb, R. Halder, et al., Single-Cell Transcriptomics and In Situ Morphological Analyses Reveal Microglia Heterogeneity Across the Nigrostriatal Pathway, Front Immunol. 12 (2021) 639613. 10.3389/fimmu.2021.639613.	-0.0599407	-0.0661536	-0.0741668	0.00890188	-0.0674494	0.18801	-0.0708009	-0.0588429	-0.0676638	0.0285537	-0.0628623	-0.00264282	-0.0214843	-0.00673049	-0.0203405	-0.0745001	0.030583	-0.0156696	-0.00608253	0.00792292	0.0117264	-0.00590999	-0.0337613	0.00550076	0.00338051	0.0529165	-0.0827919	-0.0371906	0.00292603	-0.0303967	0.135195	0.0169279	-0.0576791	-0.0573944	-0.0185591	-0.0304076	0.119709
Cfap36	mRNA	Cfap36	Mus musculus	ependymal		brain	midbrain			yes		O. Uriarte Huarte, D. Kyriakis, T. Heurtaux, Y. Pires-Afonso, K. Grzyb, R. Halder, et al., Single-Cell Transcriptomics and In Situ Morphological Analyses Reveal Microglia Heterogeneity Across the Nigrostriatal Pathway, Front Immunol. 12 (2021) 639613. 10.3389/fimmu.2021.639613.	-0.207596	-0.364468	-0.29702	0.232155	-0.234719	-0.0516842	-0.255311	-0.228886	-0.209031	0.161296	-0.220681	0.237289	0.275591	0.286762	0.393858	-0.275676	0.116384	0.349159	0.402936	0.155865	0.326719	0.318017	-0.133396	0.351329	0.12103	0.187868	-0.127828	-0.148722	0.251258	-0.176162	0.0638481	0.334763	-0.157079	-0.30929	0.0406235	0.212395	0.168411
H2_Aa	mRNA	H2-Aa	Mus musculus	microglia	activated_microglia	brain	midbrain_nigrostriatum			yes		O. Uriarte Huarte, D. Kyriakis, T. Heurtaux, Y. Pires-Afonso, K. Grzyb, R. Halder, et al., Single-Cell Transcriptomics and In Situ Morphological Analyses Reveal Microglia Heterogeneity Across the Nigrostriatal Pathway, Front Immunol. 12 (2021) 639613. 10.3389/fimmu.2021.639613.	-0.0243475	0.0157922	0.0819941	-0.0261659	-0.0297921	0.0532286	-0.0295867	-0.0236793	-0.0292119	-0.0256607	-0.0290018	-0.0270318	-0.0242121	-0.0280969	-0.0263501	-0.00500008	-0.0309156	-0.0253337	-0.0338805	-0.0183046	-0.031975	-0.0315156	-0.00589979	-0.0338805	-0.0299944	-0.0338805	-0.0263362	-0.0243153	-0.0338805	-0.0238866	0.0329418	-0.0338805	0.028597	0.0419423	-0.0338805	-0.02687	-0.0338805
CD74	mRNA	Cd74	Mus musculus	microglia	activated_microglia	brain	midbrain_nigrostriatum			yes		O. Uriarte Huarte, D. Kyriakis, T. Heurtaux, Y. Pires-Afonso, K. Grzyb, R. Halder, et al., Single-Cell Transcriptomics and In Situ Morphological Analyses Reveal Microglia Heterogeneity Across the Nigrostriatal Pathway, Front Immunol. 12 (2021) 639613. 10.3389/fimmu.2021.639613.	-0.038657	0.0793252	0.122685	-0.0295807	-0.0357058	0.108288	-0.0386578	-0.0391135	-0.036093	-0.0268492	-0.0360323	-0.0227684	-0.0365387	-0.0361627	-0.0286215	0.0143889	-0.0303759	-0.0422008	-0.0358735	-0.00828396	-0.0300665	-0.03236	-0.0365953	-0.0245599	-0.0233318	-0.0355163	-0.0458339	-0.0150577	-0.0339764	-0.0353428	-0.0481508	-0.0272525	0.0532833	0.212414	-0.0533929	-0.0355506	-0.0232929
Map2	mRNA	Map2	Mus musculus	neuron		brain	midbrain_nigrostriatum			yes		O. Uriarte Huarte, D. Kyriakis, T. Heurtaux, Y. Pires-Afonso, K. Grzyb, R. Halder, et al., Single-Cell Transcriptomics and In Situ Morphological Analyses Reveal Microglia Heterogeneity Across the Nigrostriatal Pathway, Front Immunol. 12 (2021) 639613. 10.3389/fimmu.2021.639613.	-0.0222622	-0.995262	-1.15924	0.560008	-0.695834	-0.178632	-0.77116	0.0166904	-0.674167	0.629239	-0.532035	0.625064	0.571692	0.494241	0.562067	-1.10079	0.507634	0.652478	0.48908	0.525364	0.609088	0.594435	0.548117	0.703443	0.433025	0.494507	-0.261959	-0.121979	0.521468	-0.209147	0.565525	0.12739	-1.06907	-0.89411	0.616234	0.496097	-0.871678
C1ql1	mRNA	C1ql1	Mus musculus	oligodendrocyte	OPC	brain	midbrain_nigrostriatum			yes		O. Uriarte Huarte, D. Kyriakis, T. Heurtaux, Y. Pires-Afonso, K. Grzyb, R. Halder, et al., Single-Cell Transcriptomics and In Situ Morphological Analyses Reveal Microglia Heterogeneity Across the Nigrostriatal Pathway, Front Immunol. 12 (2021) 639613. 10.3389/fimmu.2021.639613.	-0.0603417	-0.106948	-0.0600365	-0.0714846	-0.0748133	1.1147	-0.0678744	-0.0800702	-0.075483	-0.088144	-0.0935592	-0.096489	-0.0960312	-0.100099	-0.0336464	-0.061438	-0.0952379	-0.108993	-0.0459939	-4.24668e-05	-0.083968	-0.0422296	3.31152	-0.0758628	-0.101058	-0.0265047	0.0868615	-0.06563	-0.0879334	0.222665	-0.0925522	-0.096387	0.0721863	-0.0710868	-0.0216166	-0.0976689	-0.0835093
Foxb1	mRNA	Foxb1	Mus musculus	astrocyte		brain	midbrain			yes		O. Uriarte Huarte, D. Kyriakis, T. Heurtaux, Y. Pires-Afonso, K. Grzyb, R. Halder, et al., Single-Cell Transcriptomics and In Situ Morphological Analyses Reveal Microglia Heterogeneity Across the Nigrostriatal Pathway, Front Immunol. 12 (2021) 639613. 10.3389/fimmu.2021.639613.	0.324249	-0.0769142	-0.063984	-0.0566909	-0.0709132	-0.0499539	-0.070754	0.346249	-0.0722256	-0.0673906	-0.0703814	-0.0579076	-0.0623779	-0.0704332	-0.066185	-0.0603403	-0.0744365	-0.0696048	-0.0709451	-0.0659669	-0.0659815	0.179563	-0.0712941	-0.0742024	-0.0769142	-0.0602543	0.258075	-0.0700411	-0.0769142	-0.0668774	-0.0769142	-0.0769142	-0.0769142	-0.0642229	-0.0582139	-0.0579253	-0.0769142
Myrf	protein	Myrf	not_specific	oligodendrocyte		brain	premyelinating_OL					R.E. Pepper, K.A. Pitman, C.L. Cullen, K.M. Young, How Do Cells of the Oligodendrocyte Lineage Affect Neuronal Circuits to Influence Motor Function, Memory and Mood?, Front Cell Neurosci. 12 (2018) 399. 10.3389/fncel.2018.00399.	-0.373136	-0.367963	-0.368498	-0.370876	0.7696	-0.258168	0.754967	-0.377691	0.854101	-0.360407	0.682019	-0.372257	-0.384914	-0.379744	-0.384501	-0.371894	-0.370711	-0.385938	-0.387561	-0.382865	-0.374977	-0.377051	-0.312169	-0.391925	-0.374905	-0.361931	-0.367705	-0.35233	-0.384238	0.805815	-0.359661	-0.378962	-0.333475	-0.340821	-0.366904	-0.346381	-0.381088
Enpp6	protein	Enpp6	not_specific	oligodendrocyte	premyelinating_OL	brain	brain					R.E. Pepper, K.A. Pitman, C.L. Cullen, K.M. Young, How Do Cells of the Oligodendrocyte Lineage Affect Neuronal Circuits to Influence Motor Function, Memory and Mood?, Front Cell Neurosci. 12 (2018) 399. 10.3389/fncel.2018.00399.	-0.268262	-0.213049	-0.246076	-0.265959	0.525297	-0.0435295	-0.194686	-0.26964	0.601518	-0.270652	2.41289	-0.271222	-0.270802	-0.26747	-0.271137	-0.248471	-0.255227	-0.271354	-0.270565	-0.276123	-0.272597	-0.269139	-0.270203	-0.272218	-0.264499	-0.25791	-0.272101	-0.246178	-0.267934	0.776227	-0.178004	-0.265298	-0.203449	-0.189414	-0.264334	-0.271319	-0.265773
Olig2	protein	Olig2	not_specific	oligodendrocyte		brain	OPC					R.E. Pepper, K.A. Pitman, C.L. Cullen, K.M. Young, How Do Cells of the Oligodendrocyte Lineage Affect Neuronal Circuits to Influence Motor Function, Memory and Mood?, Front Cell Neurosci. 12 (2018) 399. 10.3389/fncel.2018.00399.	0.117638	-0.170359	-0.166614	-0.215003	0.214189	0.464964	0.270531	0.1655	0.215862	-0.219246	0.0156169	-0.221604	-0.217153	-0.216673	-0.219562	-0.159524	-0.212746	-0.216091	-0.209521	-0.220464	-0.213791	-0.222074	1.54018	-0.218111	-0.227218	-0.201205	-0.182445	-0.186493	-0.198778	0.757809	-0.220537	-0.198866	-0.193455	-0.155257	-0.19871	-0.222197	-0.19216
Sox10	protein	Sox10	not_specific	oligodendrocyte		brain	OPC					R.E. Pepper, K.A. Pitman, C.L. Cullen, K.M. Young, How Do Cells of the Oligodendrocyte Lineage Affect Neuronal Circuits to Influence Motor Function, Memory and Mood?, Front Cell Neurosci. 12 (2018) 399. 10.3389/fncel.2018.00399.	-0.448845	-0.462044	-0.437388	-0.45939	0.855687	0.208019	0.853818	-0.454517	0.854087	-0.464925	0.839504	-0.463789	-0.464926	-0.460446	-0.464026	-0.438502	-0.459501	-0.465662	-0.458983	-0.46752	-0.461939	-0.46108	1.0863	-0.465536	-0.454933	-0.458518	-0.44853	-0.418567	-0.458532	1.19149	-0.456249	-0.460692	-0.439146	-0.432592	-0.458085	-0.460187	-0.446948
BCAS1	protein	Bcas1	not_specific	oligodendrocyte	premyelinating_OL	brain	brain					R.E. Pepper, K.A. Pitman, C.L. Cullen, K.M. Young, How Do Cells of the Oligodendrocyte Lineage Affect Neuronal Circuits to Influence Motor Function, Memory and Mood?, Front Cell Neurosci. 12 (2018) 399. 10.3389/fncel.2018.00399.	-0.561232	-0.567128	-0.565995	-0.590774	1.11434	0.152183	1.15209	-0.570464	1.18916	-0.601353	0.870397	-0.599982	-0.598406	-0.600605	-0.59683	-0.56626	-0.602251	-0.593716	-0.590816	-0.602767	-0.587123	-0.601828	0.734831	-0.599422	-0.583313	-0.580751	-0.552544	-0.501575	-0.578857	1.87762	-0.566204	-0.59237	-0.525944	-0.515139	-0.586075	-0.590414	-0.552627
ferritin	protein	Fth1	non_specific	microglia		brain	brain					R.E. Pepper, K.A. Pitman, C.L. Cullen, K.M. Young, How Do Cells of the Oligodendrocyte Lineage Affect Neuronal Circuits to Influence Motor Function, Memory and Mood?, Front Cell Neurosci. 12 (2018) 399. 10.3389/fncel.2018.00399.	-0.141137	0.450523	0.0145375	-0.438526	0.696872	0.00865788	0.640355	-0.15262	0.736097	-0.470154	0.849899	-0.471291	-0.428403	-0.454531	-0.420162	-0.00852033	-0.47045	-0.417634	-0.40358	-0.45415	-0.462303	-0.448823	-0.237091	-0.455248	-0.374903	-0.468432	-0.0951781	0.232253	-0.390162	0.0563542	-0.450346	-0.473038	0.0893132	0.665992	-0.492436	-0.443595	-0.130856
IBA_1	protein	Aif1	Mus musculus	microglia		brain	brain				myeloid_surface	R.E. Pepper, K.A. Pitman, C.L. Cullen, K.M. Young, How Do Cells of the Oligodendrocyte Lineage Affect Neuronal Circuits to Influence Motor Function, Memory and Mood?, Front Cell Neurosci. 12 (2018) 399. 10.3389/fncel.2018.00399.	-0.0693537	-0.0658625	1.72966	-0.0578864	-0.064114	0.0144806	-0.0655318	-0.0694963	-0.0668426	-0.0662022	-0.0618696	-0.0658267	-0.0409353	-0.0662574	-0.0397414	1.66143	-0.079243	-0.0444031	-0.0319261	-0.0645966	-0.0608087	-0.0525623	-0.0566669	-0.0328101	-0.0662255	-0.0634685	-0.0749195	-0.0641152	-0.0583871	-0.0688892	-0.0382818	-0.0786717	0.00562955	-0.0264913	-0.054454	-0.0622018	-0.0527452
CX3CR1	mRNA	Cx3cr1	non_specific	microglia	intersticial_microglia	brain	brain				myeloid_surface	R.E. Pepper, K.A. Pitman, C.L. Cullen, K.M. Young, How Do Cells of the Oligodendrocyte Lineage Affect Neuronal Circuits to Influence Motor Function, Memory and Mood?, Front Cell Neurosci. 12 (2018) 399. 10.3389/fncel.2018.00399.	-0.173605	-0.18751	4.20597	-0.0895294	-0.15066	0.248679	-0.164488	-0.180427	-0.170765	-0.0740668	-0.129006	-0.0926375	-0.118751	-0.0969781	-0.0937739	4.11042	-0.0752569	-0.108585	-0.0941816	-0.0732734	-0.0879915	-0.107976	-0.170309	-0.045447	-0.15269	-0.0802351	-0.174888	-0.174751	-0.0974186	-0.0430923	-0.0891909	-0.0672347	-0.201383	-0.18023	-0.0621065	-0.0882792	1.60034
TMEM119	mRNA	Tmem119	non_specific	microglia		brain	brain					R.E. Pepper, K.A. Pitman, C.L. Cullen, K.M. Young, How Do Cells of the Oligodendrocyte Lineage Affect Neuronal Circuits to Influence Motor Function, Memory and Mood?, Front Cell Neurosci. 12 (2018) 399. 10.3389/fncel.2018.00399.	-0.0696202	-0.0870909	2.37705	-0.0794357	-0.0672096	-0.00636864	-0.0693942	-0.0768024	-0.0701232	-0.0808285	-0.0698093	-0.0834093	-0.0827231	-0.0777838	-0.0860673	2.34374	-0.0810607	-0.0814366	-0.0828399	-0.080551	-0.0784766	-0.0795696	-0.0639088	-0.0870909	-0.0751288	-0.0746454	-0.0518239	-0.0636627	-0.0784365	-0.0695375	-0.0743279	-0.0870909	0.136131	-0.0616826	-0.073489	-0.075635	-0.0663601
P2RY12	mRNA	P2ry12	non_specific	microglia	quiescent_microglia	brain	brain					R.E. Pepper, K.A. Pitman, C.L. Cullen, K.M. Young, How Do Cells of the Oligodendrocyte Lineage Affect Neuronal Circuits to Influence Motor Function, Memory and Mood?, Front Cell Neurosci. 12 (2018) 399. 10.3389/fncel.2018.00399.	-0.247796	-0.446625	3.07731	0.217656	-0.424363	-0.16572	-0.429658	-0.248725	-0.449111	0.328197	-0.404846	0.292941	0.0288947	0.235254	0.130772	3.0222	0.281328	0.122597	0.198367	0.277941	0.313907	0.20996	-0.157273	0.0605749	0.163017	0.390241	-0.277118	-0.0595625	0.169951	-0.349785	0.293481	0.109583	-0.403915	-0.42334	0.112456	0.122534	-0.257471
CD68	protein	Cd68	non_specific	microglia		brain	subventricular_thalamus				myeloid_surface	R.E. Pepper, K.A. Pitman, C.L. Cullen, K.M. Young, How Do Cells of the Oligodendrocyte Lineage Affect Neuronal Circuits to Influence Motor Function, Memory and Mood?, Front Cell Neurosci. 12 (2018) 399. 10.3389/fncel.2018.00399.	-0.0389665	-0.0507748	0.496458	-0.0323808	-0.0223802	-0.000604688	-0.0345774	-0.038468	-0.0158743	-0.033822	-0.0121149	-0.0243383	-0.0444912	-0.0330571	-0.0306521	0.486815	-0.0251022	-0.0245544	-0.0607184	-0.0359925	-0.0102307	-0.0381981	-0.0495931	-0.0243539	-0.0504656	-0.0591271	-0.0487658	-0.0456035	0.00559994	0.060749	-0.0131428	-0.0367233	-0.0243751	-0.0332542	-0.04347	-0.0391374	-0.0403808
Pu.1	mRNA	Spi1	Mus_musculus	microglia		brain	brain					R.E. Pepper, K.A. Pitman, C.L. Cullen, K.M. Young, How Do Cells of the Oligodendrocyte Lineage Affect Neuronal Circuits to Influence Motor Function, Memory and Mood?, Front Cell Neurosci. 12 (2018) 399. 10.3389/fncel.2018.00399.	-0.0962291	-0.0948432	3.74833	-0.105158	-0.103111	0.0498569	-0.107434	-0.100496	-0.107922	-0.108963	-0.105243	-0.107547	-0.109035	-0.109483	-0.110509	3.62833	-0.102153	-0.109321	-0.111529	-0.105855	-0.107618	-0.103782	-0.109229	-0.106126	-0.102104	-0.105828	-0.090666	-0.10189	-0.111529	-0.104408	-0.104861	-0.102404	-0.0968677	-0.0828093	-0.096109	-0.103306	-0.102101
SALL1	mRNA	Sall1	Mus musculus	microglia		brain	brain					R.E. Pepper, K.A. Pitman, C.L. Cullen, K.M. Young, How Do Cells of the Oligodendrocyte Lineage Affect Neuronal Circuits to Influence Motor Function, Memory and Mood?, Front Cell Neurosci. 12 (2018) 399. 10.3389/fncel.2018.00399.	0.00767355	-0.204647	2.24484	-0.203231	0.153464	-0.0720469	-0.0121884	0.0134291	0.259762	-0.208698	0.456788	-0.212886	-0.220611	-0.214505	-0.183826	2.20561	-0.224879	-0.216781	-0.222725	-0.212166	-0.119584	-0.219385	-0.158777	-0.130084	-0.220208	-0.174894	-0.0267634	-0.170384	-0.219163	-0.121119	-0.206494	-0.2192	-0.003071	-0.172607	-0.217414	-0.213579	-0.197005
Siglec_H	mRNA	Siglech	Mus musculus	microglia		brain	brain					R.E. Pepper, K.A. Pitman, C.L. Cullen, K.M. Young, How Do Cells of the Oligodendrocyte Lineage Affect Neuronal Circuits to Influence Motor Function, Memory and Mood?, Front Cell Neurosci. 12 (2018) 399. 10.3389/fncel.2018.00399.	-0.132126	-0.12886	5.2537	-0.135958	-0.129727	-0.0111168	-0.133495	-0.13882	-0.132443	-0.138246	-0.139671	-0.137651	-0.142714	-0.138335	-0.140988	5.18809	-0.137986	-0.143419	-0.139273	-0.144065	-0.139976	-0.140987	-0.124849	-0.138424	-0.136431	-0.136785	-0.134244	-0.130753	-0.142745	-0.128868	-0.132301	-0.129504	-0.131987	-0.12699	-0.136883	-0.137102	-0.126673
CD11b	protein	Itgam	non_specific	microglia		brain	subventricular_thalamus					R.E. Pepper, K.A. Pitman, C.L. Cullen, K.M. Young, How Do Cells of the Oligodendrocyte Lineage Affect Neuronal Circuits to Influence Motor Function, Memory and Mood?, Front Cell Neurosci. 12 (2018) 399. 10.3389/fncel.2018.00399.	-0.107629	-0.10602	4.1985	-0.112416	-0.105794	-0.0133473	-0.109402	-0.111737	-0.112723	-0.113466	-0.109716	-0.113888	-0.114961	-0.111643	-0.114638	4.10625	-0.114914	-0.114778	-0.116999	-0.11407	-0.115547	-0.111288	-0.115567	-0.109408	-0.115885	-0.113357	-0.114533	-0.074316	-0.116154	-0.113963	-0.114426	-0.108859	-0.0905429	-0.0975399	-0.11081	-0.118187	-0.114193
CD14	protein	Cd14	non_specific	microglia		brain	brain					R.E. Pepper, K.A. Pitman, C.L. Cullen, K.M. Young, How Do Cells of the Oligodendrocyte Lineage Affect Neuronal Circuits to Influence Motor Function, Memory and Mood?, Front Cell Neurosci. 12 (2018) 399. 10.3389/fncel.2018.00399.	-0.0455667	-0.0496063	0.693093	-0.0373567	-0.0458265	-0.0168892	-0.0465346	-0.0465412	-0.0496063	-0.0320715	-0.0463488	-0.0307467	-0.0419895	-0.0496063	-0.0445465	0.680634	-0.0480312	-0.0424257	-0.0496063	-0.0383544	-0.0363466	-0.0384481	-0.0496063	-0.0386678	-0.0298049	-0.0244715	-0.0496063	-0.030446	-0.0399201	-0.0496063	-0.0353564	-0.0394583	-0.0370913	-0.0369494	-0.0394372	-0.0470508	-0.034562
CD16	protein	Fcgr3	Mus musculus	microglia		brain	brain					R.E. Pepper, K.A. Pitman, C.L. Cullen, K.M. Young, How Do Cells of the Oligodendrocyte Lineage Affect Neuronal Circuits to Influence Motor Function, Memory and Mood?, Front Cell Neurosci. 12 (2018) 399. 10.3389/fncel.2018.00399.	-0.0748453	-0.0893323	2.2957	-0.0692563	-0.0743029	0.00560324	-0.0770142	-0.0759981	-0.0766319	-0.0646931	-0.0760042	-0.0706215	-0.0747482	-0.0814154	-0.0658886	2.21868	-0.0736774	-0.0758872	-0.0685704	-0.0850477	-0.0812245	-0.0844132	-0.0752661	-0.0760858	-0.0734061	-0.0530056	-0.0893323	-0.00597312	-0.0803642	-0.0512023	-0.00517962	-0.0893323	-0.0767677	-0.0893323	-0.0710098	-0.0865002	-0.0725191
CD80	protein	Cd80	non_specific	microglia		brain	brain					R.E. Pepper, K.A. Pitman, C.L. Cullen, K.M. Young, How Do Cells of the Oligodendrocyte Lineage Affect Neuronal Circuits to Influence Motor Function, Memory and Mood?, Front Cell Neurosci. 12 (2018) 399. 10.3389/fncel.2018.00399.	-0.0866894	-0.103393	1.04943	0.032246	-0.114311	0.0464587	-0.121478	-0.0896555	-0.122555	0.0822212	-0.0982596	0.0368133	0.000396379	0.121069	-0.0393852	1.04275	0.0626536	0.00440109	-0.00828683	0.0173112	0.00638769	0.0199553	-0.0897944	-0.0529847	0.0216963	0.0186433	-0.0901754	-0.0441071	-0.0215475	-0.0795531	0.0112367	0.0892937	-0.0326651	-0.0849375	0.0789408	0.0715969	0.0445508
CD86	protein	Cd86	non_specific	microglia		brain	subventricular_thalamus					R.E. Pepper, K.A. Pitman, C.L. Cullen, K.M. Young, How Do Cells of the Oligodendrocyte Lineage Affect Neuronal Circuits to Influence Motor Function, Memory and Mood?, Front Cell Neurosci. 12 (2018) 399. 10.3389/fncel.2018.00399.	-0.101469	-0.116864	3.61483	-0.108407	-0.0859437	0.0600893	-0.111496	-0.104934	-0.109456	-0.114616	-0.000961444	-0.110969	-0.112126	-0.108951	-0.110526	3.49806	-0.111579	-0.112088	-0.115343	-0.10701	-0.11278	-0.114925	-0.116864	-0.0846098	-0.114733	-0.104574	-0.106924	-0.100896	-0.116864	-0.113512	-0.0854438	-0.0964874	-0.110403	-0.116864	-0.108862	-0.112522	-0.116864
CD115	protein	Csf1r	non_specific	microglia		brain	brain					R.E. Pepper, K.A. Pitman, C.L. Cullen, K.M. Young, How Do Cells of the Oligodendrocyte Lineage Affect Neuronal Circuits to Influence Motor Function, Memory and Mood?, Front Cell Neurosci. 12 (2018) 399. 10.3389/fncel.2018.00399.	-0.139753	-0.135224	5.17643	-0.136269	-0.135627	0.077992	-0.13954	-0.146999	-0.144495	-0.141298	-0.13928	-0.140999	-0.140153	-0.133958	-0.144913	5.01794	-0.133666	-0.145623	-0.142965	-0.13483	-0.133712	-0.138042	-0.139585	-0.135149	-0.125552	-0.138521	-0.137117	-0.114437	-0.139948	-0.118559	-0.136148	-0.125836	-0.125919	-0.0861236	-0.139211	-0.137386	-0.103154
FCRLS	mRNA	Fcrls	Mus musculus	microglia		brain	brain					R.E. Pepper, K.A. Pitman, C.L. Cullen, K.M. Young, How Do Cells of the Oligodendrocyte Lineage Affect Neuronal Circuits to Influence Motor Function, Memory and Mood?, Front Cell Neurosci. 12 (2018) 399. 10.3389/fncel.2018.00399.	-0.0861539	-0.0466138	2.80203	-0.0875027	-0.0823194	0.0534588	-0.084636	-0.0875035	-0.0860922	-0.0891105	-0.0857115	-0.0889503	-0.0833925	-0.0884102	-0.0899418	2.75603	-0.0919988	-0.0834002	-0.0904167	-0.0879786	-0.0910741	-0.0861131	-0.0901154	-0.0874664	-0.0855105	-0.0888448	-0.0861358	-0.0841029	-0.0937251	-0.0766649	-0.0937251	-0.089019	-0.0937251	-0.0577686	-0.0856279	-0.0825758	-0.088498
CD172a	protein	Sirpa	non_specific	microglia		brain	brain					R.E. Pepper, K.A. Pitman, C.L. Cullen, K.M. Young, How Do Cells of the Oligodendrocyte Lineage Affect Neuronal Circuits to Influence Motor Function, Memory and Mood?, Front Cell Neurosci. 12 (2018) 399. 10.3389/fncel.2018.00399.	0.135254	-0.298176	3.13292	0.0323098	-0.313626	-0.0447974	-0.314099	0.0752988	-0.326299	0.0292021	-0.311978	0.0308232	0.0329816	0.000913328	0.18307	3.07954	0.0292513	0.129419	0.115396	-0.0285993	0.0437639	0.0358902	-0.05117	0.0375188	0.0232351	-0.0573037	0.571949	0.000658579	0.0558969	-0.299133	-0.254337	-0.0629036	-0.23923	-0.286941	-0.142205	-0.00693246	-0.234832
Glut5	protein	Slc2a5	non_specific	microglia		brain	brain					R.E. Pepper, K.A. Pitman, C.L. Cullen, K.M. Young, How Do Cells of the Oligodendrocyte Lineage Affect Neuronal Circuits to Influence Motor Function, Memory and Mood?, Front Cell Neurosci. 12 (2018) 399. 10.3389/fncel.2018.00399.	-0.0737694	-0.082835	1.46186	-0.0319889	-0.074723	-0.0555342	-0.0767199	-0.0769064	-0.0750062	-0.0133801	-0.0750111	-0.0334204	-0.0453872	-0.0594293	-0.0424064	1.44461	-0.0322689	-0.0458774	-0.0757171	0.00920873	-0.0293771	-0.0520307	-0.0778923	-0.0482642	-0.0725271	0.0108986	-0.0525107	-0.0732231	0.00509138	-0.082835	-0.0390543	0.0829307	-0.0702785	-0.0574374	-0.0522933	-0.0701736	-0.0535656
HexB	mRNA	Hexb	Mus musculus	microglia		brain	brain					R.E. Pepper, K.A. Pitman, C.L. Cullen, K.M. Young, How Do Cells of the Oligodendrocyte Lineage Affect Neuronal Circuits to Influence Motor Function, Memory and Mood?, Front Cell Neurosci. 12 (2018) 399. 10.3389/fncel.2018.00399.	-0.136116	-0.10789	4.3246	-0.062536	-0.158679	-0.0757294	-0.181848	-0.149889	-0.147531	-0.0303473	-0.133942	-0.0572727	-0.109138	-0.0734715	-0.10919	4.25266	-0.0329861	-0.126874	-0.114877	-0.0724755	-0.0321959	-0.0468762	-0.202092	-0.118766	-0.0869919	-0.0459406	-0.0767591	-0.117447	-0.110892	-0.253779	0.0483604	-0.0734024	-0.104299	-0.0736778	0.0146561	0.0339293	-0.112909
CD64	protein	Fcgr1	non_specific	microglia		brain	brain					R.E. Pepper, K.A. Pitman, C.L. Cullen, K.M. Young, How Do Cells of the Oligodendrocyte Lineage Affect Neuronal Circuits to Influence Motor Function, Memory and Mood?, Front Cell Neurosci. 12 (2018) 399. 10.3389/fncel.2018.00399.	-0.0629015	-0.0679213	1.49824	-0.0589672	-0.0601721	0.00104512	-0.0611511	-0.0660088	-0.0632889	-0.059367	-0.059019	-0.059942	-0.0605747	-0.0559418	-0.0617051	1.43618	-0.0679213	-0.0651551	-0.057663	-0.0505091	-0.0575777	-0.0620446	-0.059315	-0.0634773	-0.0611002	-0.0524864	-0.0527816	-0.048726	-0.0679213	-0.0679213	-0.0509	-0.0634765	-0.0553834	-0.0552413	-0.0526057	-0.0679213	-0.0528496
MMP9	protein	Mmp9	non_specific	microglia		brain	brain					R.E. Pepper, K.A. Pitman, C.L. Cullen, K.M. Young, How Do Cells of the Oligodendrocyte Lineage Affect Neuronal Circuits to Influence Motor Function, Memory and Mood?, Front Cell Neurosci. 12 (2018) 399. 10.3389/fncel.2018.00399.	-0.0779399	-0.0630479	-0.0710586	0.047882	-0.0736784	-0.0603534	-0.0735191	-0.0776315	-0.0738187	0.0656014	-0.0747801	0.0503099	-0.00475621	0.0232602	0.0414828	-0.0691236	0.0316213	0.00975271	0.0650928	0.0927707	0.0884366	0.0460046	-0.0684377	0.0321575	0.0349478	0.196065	-0.0796811	-0.0412457	0.00957525	-0.0696415	0.120853	0.00669263	-0.0796811	-0.054728	-0.0090194	0.0339125	-0.0645917
ARG1	protein	Arg1	Mus musculus	microglia		brain	brain					R.E. Pepper, K.A. Pitman, C.L. Cullen, K.M. Young, How Do Cells of the Oligodendrocyte Lineage Affect Neuronal Circuits to Influence Motor Function, Memory and Mood?, Front Cell Neurosci. 12 (2018) 399. 10.3389/fncel.2018.00399.	-0.0512805	-0.0416212	-0.00161549	-0.00126208	-0.0255829	-0.0386887	-0.0385529	-0.0500098	-0.0180123	-0.0108834	-0.011179	-0.0211306	-0.013561	-0.0190058	-0.00148205	-0.00445984	0.0113716	-0.00252003	0.0281911	-0.0253794	-0.00769434	-0.0226934	-0.054426	0.0305965	0.100396	-0.00713876	-0.0672965	0.0498482	0.228225	0.0370766	-0.0248335	-0.0594448	-0.0629079	-0.0494941	-0.00347274	0.00614804	-0.0597895
TSPO	protein	Tspo	non_specific	microglia		brain	brain					R.E. Pepper, K.A. Pitman, C.L. Cullen, K.M. Young, How Do Cells of the Oligodendrocyte Lineage Affect Neuronal Circuits to Influence Motor Function, Memory and Mood?, Front Cell Neurosci. 12 (2018) 399. 10.3389/fncel.2018.00399.	0.000188744	1.14041	0.0969688	0.0020695	-0.0771217	0.115902	-0.0784351	-0.00755061	-0.0862864	0.0443005	-0.0651674	0.0232002	-0.04849	0.01888	-0.0267687	0.0839573	-0.0172927	-0.0339101	-0.0360421	-0.0161101	-0.00791237	-0.0213834	-0.0563691	0.0176179	-0.0687216	-0.0135131	0.0172344	0.0668235	-0.00504409	-0.0712749	-0.0302369	-0.00120589	0.0748889	1.16359	-0.0333199	0.0482007	0.339821
iNOS	protein	Nos2	Homo sapiens	microglia		brain	brain				neurodegenerative	R.E. Pepper, K.A. Pitman, C.L. Cullen, K.M. Young, How Do Cells of the Oligodendrocyte Lineage Affect Neuronal Circuits to Influence Motor Function, Memory and Mood?, Front Cell Neurosci. 12 (2018) 399. 10.3389/fncel.2018.00399.	-0.0226086	0.257712	-0.0148999	-0.0170983	-0.020961	-0.00517402	-0.0222488	-0.0224553	-0.0188106	-0.00957248	-0.0218498	-0.0184999	-0.0234743	-0.0137157	-0.0159208	-0.0152313	-0.0234743	-0.0192054	-0.0234743	-0.0186109	-0.0129455	-0.017985	0.0100677	-0.0234743	-0.0234743	-0.0163604	-0.0234743	-0.00436379	-0.0234743	-0.0134908	-0.0131408	-0.0234743	-0.0109918	0.203758	-0.0234743	-0.0234743	-0.0234743
TextitiNOS	protein	Ttn	non_specific	microglia		brain	brain					R.E. Pepper, K.A. Pitman, C.L. Cullen, K.M. Young, How Do Cells of the Oligodendrocyte Lineage Affect Neuronal Circuits to Influence Motor Function, Memory and Mood?, Front Cell Neurosci. 12 (2018) 399. 10.3389/fncel.2018.00399.	-0.0547672	0.0118496	-0.160146	0.0833586	-0.0909833	-0.0769254	-0.111488	-0.0507332	-0.0914274	0.0961114	-0.0376154	0.0576197	0.0145418	0.0884073	0.037848	-0.146796	0.13295	0.0663154	0.0446281	0.0614988	0.0569562	0.0464158	-0.103375	-0.00236012	0.228586	0.138695	-0.0784452	-0.0268321	0.0735859	-0.0854713	0.0562448	0.429755	-0.11523	-0.0064555	0.0358329	0.203668	0.0440347
FIZZ1	protein	Retnlb	Mus musculus	microglia		brain	brain					R.E. Pepper, K.A. Pitman, C.L. Cullen, K.M. Young, How Do Cells of the Oligodendrocyte Lineage Affect Neuronal Circuits to Influence Motor Function, Memory and Mood?, Front Cell Neurosci. 12 (2018) 399. 10.3389/fncel.2018.00399.	-0.00634307	-0.00634307	-0.00634307	-0.00550544	-0.00602944	-0.00634307	-0.00634307	-0.00634307	-0.00634307	-0.00634307	-0.00634307	-0.00468776	-0.00310057	-0.00634307	-0.00257278	-0.00634307	-0.00634307	-0.00634307	-0.00634307	-0.00634307	-0.00634307	-0.00634307	-0.00634307	-0.00634307	-0.00634307	-0.00634307	-0.00634307	-0.00634307	-0.00634307	0.00362341	-0.00634307	-0.00634307	-0.00634307	-0.00634307	-0.00634307	-0.00634307	-0.00634307
CD40	protein	Cd40	non_specific	microglia		brain	brain					R.E. Pepper, K.A. Pitman, C.L. Cullen, K.M. Young, How Do Cells of the Oligodendrocyte Lineage Affect Neuronal Circuits to Influence Motor Function, Memory and Mood?, Front Cell Neurosci. 12 (2018) 399. 10.3389/fncel.2018.00399.	-0.0693167	0.50622	-0.0349333	0.0316212	-0.0726533	-0.0152567	-0.0712974	-0.0682882	-0.0784913	0.0307275	-0.0663373	0.0109688	0.284747	-0.0456933	0.0426131	-0.0478654	-0.000222541	0.0645268	0.018604	-0.00455285	-0.0148131	-0.00841702	-0.0642018	0.0245893	-0.0230314	0.0286672	-0.0867042	-0.0291309	-0.00506579	-0.0766577	-0.0478877	-0.0452366	0.109249	0.391237	-0.0272681	-0.0370815	-0.0414047
F4_80	protein	Adgre1	Mus musculus	microglia		brain	brain					R.E. Pepper, K.A. Pitman, C.L. Cullen, K.M. Young, How Do Cells of the Oligodendrocyte Lineage Affect Neuronal Circuits to Influence Motor Function, Memory and Mood?, Front Cell Neurosci. 12 (2018) 399. 10.3389/fncel.2018.00399.	-0.0893329	-0.081974	2.72323	-0.0869884	-0.0874673	0.140018	-0.0901968	-0.0936975	-0.0911046	-0.0917788	-0.0910906	-0.0890517	-0.0950413	-0.0868604	-0.0930183	2.55319	-0.0929163	-0.0918203	-0.0888166	-0.0907069	-0.0943491	-0.0881919	-0.0866838	-0.0789056	-0.088693	-0.0897658	-0.0756079	-0.0933765	-0.0986384	-0.0986384	-0.0859286	-0.0822812	-0.0749374	-0.0559089	-0.0841307	-0.090862	-0.0986384
FCER1G	protein	Fcer1g	non_specific	microglia		brain	brain					R.E. Pepper, K.A. Pitman, C.L. Cullen, K.M. Young, How Do Cells of the Oligodendrocyte Lineage Affect Neuronal Circuits to Influence Motor Function, Memory and Mood?, Front Cell Neurosci. 12 (2018) 399. 10.3389/fncel.2018.00399.	-0.0737951	-0.0114812	2.71574	-0.0816819	-0.0806718	0.0672896	-0.0831287	-0.0781845	-0.0808941	-0.0826669	-0.086885	-0.0846226	-0.0905696	-0.074873	-0.0890025	2.59292	-0.0804513	-0.0855525	-0.0702235	-0.0927128	-0.0870726	-0.0713396	-0.07545	-0.0930223	-0.0719394	-0.0765575	-0.0664741	-0.0817722	-0.0800632	-0.0647345	-0.0785029	-0.0714145	-0.0425852	-0.0167762	-0.0600606	-0.0990732	-0.0928146
CD45	protein	Ptprc	non_specific	microglia		brain	subventricular_thalamus	endothelial			inflammation	R.E. Pepper, K.A. Pitman, C.L. Cullen, K.M. Young, How Do Cells of the Oligodendrocyte Lineage Affect Neuronal Circuits to Influence Motor Function, Memory and Mood?, Front Cell Neurosci. 12 (2018) 399. 10.3389/fncel.2018.00399.	-0.134538	-0.0796081	4.86428	-0.136332	-0.130138	0.157071	-0.136448	-0.138339	-0.136755	-0.138168	-0.138544	-0.138653	-0.143453	-0.140102	-0.138227	4.65194	-0.138131	-0.138914	-0.138175	-0.135548	-0.140359	-0.132606	-0.119537	-0.13629	-0.135422	-0.135208	-0.135471	-0.120757	-0.138232	-0.139794	-0.126728	-0.13309	-0.116928	-0.072727	-0.137654	-0.131935	-0.145266
CD32	protein	Fcgr2b	Mus musculus	microglia		brain	brain					R.E. Pepper, K.A. Pitman, C.L. Cullen, K.M. Young, How Do Cells of the Oligodendrocyte Lineage Affect Neuronal Circuits to Influence Motor Function, Memory and Mood?, Front Cell Neurosci. 12 (2018) 399. 10.3389/fncel.2018.00399.	-0.055573	-0.0646776	1.17579	-0.0575683	-0.0585719	0.0858903	-0.0597554	-0.0569964	-0.058824	-0.0580297	-0.0630464	-0.0607939	-0.0573641	-0.0530154	-0.0630925	1.08505	-0.0514833	-0.0646776	-0.0517296	-0.0554707	-0.0554313	-0.0586475	-0.0646776	-0.0646776	-0.0538658	-0.0575345	-0.057361	-0.0550831	-0.0573619	-0.0646776	-0.0527945	-0.0646776	-0.019942	-0.04673	-0.0567921	-0.0646776	-0.0646776
MHC2	protein	H2-Ab1	Mus musculus	microglia	reactive_microglia	brain	brain					R.E. Pepper, K.A. Pitman, C.L. Cullen, K.M. Young, How Do Cells of the Oligodendrocyte Lineage Affect Neuronal Circuits to Influence Motor Function, Memory and Mood?, Front Cell Neurosci. 12 (2018) 399. 10.3389/fncel.2018.00399.	-0.0349408	0.00869644	0.0701943	-0.024431	-0.0300347	0.057475	-0.0293488	-0.0348865	-0.0328358	-0.0344838	-0.0296198	-0.0357961	-0.0379539	-0.039603	-0.0236115	-0.020368	-0.0250507	-0.0368051	-0.0324012	-0.0158662	-0.0365179	-0.0299289	-0.0354114	-0.0369976	-0.0287544	0.0157165	-0.0410115	-0.0122956	-0.0410115	0.0177788	0.29085	-0.0171345	0.0210185	0.022219	-0.0274974	-0.0410115	-0.0410115
CD163	protein	Cd163	non_specific	microglia	activatedM2_microglia	brain	brain					R.E. Pepper, K.A. Pitman, C.L. Cullen, K.M. Young, How Do Cells of the Oligodendrocyte Lineage Affect Neuronal Circuits to Influence Motor Function, Memory and Mood?, Front Cell Neurosci. 12 (2018) 399. 10.3389/fncel.2018.00399.	0.218154	-0.0496178	-0.0403958	-0.06169	-0.0626717	0.119821	-0.0623518	0.248604	-0.0650884	-0.0643244	-0.0629658	-0.0641972	-0.0662287	-0.0602972	-0.0662287	-0.0553241	-0.0662287	-0.0662287	-0.0566727	-0.061005	-0.0598594	-0.0662287	-0.0631059	-0.0565604	-0.0662287	-0.0623893	0.0386036	-0.0662287	-0.0600919	-0.0562026	-0.0575639	-0.0662287	-0.0445681	-0.0316799	-0.0259722	-0.00297673	-0.0516794
CD206	protein	Mrc1	non_specific	microglia	perivascular_microglia	brain	brain					R.E. Pepper, K.A. Pitman, C.L. Cullen, K.M. Young, How Do Cells of the Oligodendrocyte Lineage Affect Neuronal Circuits to Influence Motor Function, Memory and Mood?, Front Cell Neurosci. 12 (2018) 399. 10.3389/fncel.2018.00399.	-0.043756	0.0302677	0.182699	-0.0425968	-0.0466328	0.260512	-0.0486022	-0.0438398	-0.0463615	-0.0410232	-0.0441588	-0.0395903	-0.0375993	-0.0414762	-0.0477793	0.0405023	-0.0463313	-0.0439457	-0.0463645	-0.0408022	-0.0353772	-0.0497367	-0.041368	-0.0478525	-0.0466981	-0.0511324	-0.0514499	-0.0398348	-0.047097	-0.0384063	-0.0403384	-0.0396716	-0.0122994	0.038852	-0.0347048	-0.0517161	-0.0491483
MMP12	protein	Mmp12	non_specific	microglia		brain	brain					R.E. Pepper, K.A. Pitman, C.L. Cullen, K.M. Young, How Do Cells of the Oligodendrocyte Lineage Affect Neuronal Circuits to Influence Motor Function, Memory and Mood?, Front Cell Neurosci. 12 (2018) 399. 10.3389/fncel.2018.00399.	-0.0111198	-0.0111198	0.00172599	-0.00902468	-0.0101784	-0.0093091	-0.00989575	-0.0111198	-0.0111198	-0.00872761	-0.00949721	-0.0111198	-0.0111198	-0.0111198	-0.00734767	-0.00288693	-0.00696404	-0.0111198	-0.00641749	-0.0111198	-0.00586181	-0.00563721	-0.0111198	-0.0111198	-0.0111198	-0.0111198	-0.0111198	-0.00157627	-0.00117822	-0.0111198	-0.0111198	-0.000514754	-0.0111198	-0.0111198	-0.0111198	-0.0111198	-0.0111198
TLR4	protein	Tlr4	Mus musculus	microglia		brain	brain					R.E. Pepper, K.A. Pitman, C.L. Cullen, K.M. Young, How Do Cells of the Oligodendrocyte Lineage Affect Neuronal Circuits to Influence Motor Function, Memory and Mood?, Front Cell Neurosci. 12 (2018) 399. 10.3389/fncel.2018.00399.	-0.0540538	0.0495208	1.93033	-0.0708863	-0.0864631	0.215753	-0.0876732	-0.0529443	-0.0926718	-0.0787649	-0.0901656	-0.0856621	-0.0827863	-0.081007	-0.0910442	1.83586	-0.0880551	-0.0864244	-0.0774068	-0.0735592	-0.0814547	-0.0852053	-0.088459	-0.0828331	0.0628903	-0.0789593	-0.0795194	-0.0505605	-0.0196975	-0.0848761	0.154968	-0.0666108	0.633364	0.0626383	-0.0603785	-0.0866982	-0.0390321
Ym1	protein	Chil3	Mus musculus	microglia		brain	brain					R.E. Pepper, K.A. Pitman, C.L. Cullen, K.M. Young, How Do Cells of the Oligodendrocyte Lineage Affect Neuronal Circuits to Influence Motor Function, Memory and Mood?, Front Cell Neurosci. 12 (2018) 399. 10.3389/fncel.2018.00399.	-0.0239197	-0.0239197	-0.0239197	-0.0101442	-0.0239197	-0.0184808	-0.0239197	-0.0239197	-0.0239197	-0.0191293	-0.0239197	-0.0112051	-0.0109269	-0.0239197	0.0176263	-0.0239197	0.00104649	-0.00684316	-0.00979486	-0.0239197	-0.0081257	-0.0184301	-0.0239197	0.0510578	-0.0103371	-0.0239197	-0.0239197	-0.0239197	-0.00401121	-0.0239197	-0.0239197	-0.0239197	-0.0239197	-0.0239197	-0.0239197	-0.0239197	-0.00891382
CD64	protein	Lrp1	Homo sapiens	microglia		brain	brain					R.E. Pepper, K.A. Pitman, C.L. Cullen, K.M. Young, How Do Cells of the Oligodendrocyte Lineage Affect Neuronal Circuits to Influence Motor Function, Memory and Mood?, Front Cell Neurosci. 12 (2018) 399. 10.3389/fncel.2018.00399.	0.847385	-0.42116	0.821061	0.125918	-0.635798	0.505129	-0.633289	0.877356	-0.641922	0.114328	-0.644339	0.12207	0.121401	0.156682	0.216035	0.824341	0.0690336	0.198996	0.142363	0.118307	0.137601	0.100183	1.04024	0.114978	0.156327	0.130175	0.62338	-0.168129	0.173576	-0.499283	0.240728	0.0699461	0.955553	-0.368768	-0.061905	0.0808007	0.286729
Prodynorphin	mRNA	Pdyn		neuron	prodynorphinergic	brain	striatum					A. Maegawa, K. Murata, K. Kuroda, S. Fujieda, Y. Fukazawa, Cellular Profiles of Prodynorphin and Preproenkephalin mRNA-Expressing Neurons in the Anterior Olfactory Tubercle of Mice, Front Neural Circuits. 16 (2022) 908964. 10.3389/fncir.2022.908964.	-0.0583429	-0.0693059	-0.0643798	0.0297942	-0.0551664	-0.0422213	-0.0565673	-0.0595451	-0.0458727	-0.0590781	-0.0630994	-0.0218356	-0.0339967	-0.0585631	0.69129	-0.0545483	-0.042156	0.0433012	0.00486777	-0.0542856	0.311001	-0.012458	-0.0803242	0.188442	-0.0605985	-0.0647836	-0.0484836	-0.0106108	0.0590271	-0.063076	-0.0765887	-0.0805138	-0.0239199	-0.0859494	-0.0507306	-0.074093	-0.0406532
Gbx2	mRNA	Gbx2	non_specific	neuron	cholinergic_neuron	brain	striatum					A. Maegawa, K. Murata, K. Kuroda, S. Fujieda, Y. Fukazawa, Cellular Profiles of Prodynorphin and Preproenkephalin mRNA-Expressing Neurons in the Anterior Olfactory Tubercle of Mice, Front Neural Circuits. 16 (2022) 908964. 10.3389/fncir.2022.908964.	-0.0454441	-0.0259631	-0.0462543	0.00797551	-0.0449738	-0.0373295	-0.0474778	-0.0450601	-0.0404404	0.0106095	-0.0444886	-0.0341655	0.0539556	0.0196991	-0.0486987	-0.042617	-0.0264923	0.456848	-0.0478135	-0.0366076	-0.0230711	-0.0255127	-0.0535514	-0.0326813	0.000490284	-0.0555645	-0.0440351	-0.0303938	0.0432447	-0.0591616	-0.0175423	-0.0490699	-0.0466347	-0.0211547	-0.0391056	-0.0120409	-0.044103
Acetylcholinesterase	mRNA	Ache	non_specific	neuron	cholinergic_neuron	brain	brain					A. Maegawa, K. Murata, K. Kuroda, S. Fujieda, Y. Fukazawa, Cellular Profiles of Prodynorphin and Preproenkephalin mRNA-Expressing Neurons in the Anterior Olfactory Tubercle of Mice, Front Neural Circuits. 16 (2022) 908964. 10.3389/fncir.2022.908964.	-0.308094	-0.317972	-0.27354	0.341777	-0.339437	-0.199383	-0.330087	-0.307057	-0.329576	0.408567	-0.375278	0.351984	0.191345	0.23382	0.322826	-0.256743	0.4565	0.295761	0.275078	0.551105	0.35357	0.412553	-0.0535049	0.327767	0.586484	0.421779	-0.322148	0.205511	0.355237	-0.398113	0.286883	0.00641286	-0.310886	-0.292683	0.176602	0.212803	-0.317714
VGluT3	mRNA	Slc17a8	non_specific	neuron	cholinergic_neuron	brain	striatum	alpha_tanycyte				A. Maegawa, K. Murata, K. Kuroda, S. Fujieda, Y. Fukazawa, Cellular Profiles of Prodynorphin and Preproenkephalin mRNA-Expressing Neurons in the Anterior Olfactory Tubercle of Mice, Front Neural Circuits. 16 (2022) 908964. 10.3389/fncir.2022.908964.	-0.0752268	-0.056135	-0.0764872	0.0526748	-0.07876	-0.0486924	-0.0801816	-0.0825691	-0.0803461	-0.0245423	-0.0738841	0.0591349	-0.049137	-0.045439	0.0385929	-0.0729055	-0.013588	-0.0445467	-0.0413716	0.0283235	0.0429266	0.136133	-0.0894335	0.752849	-0.0859372	-0.0656726	-0.0742614	-0.0798153	-0.0513705	-0.0643133	-0.0726074	1.07762	-0.0266101	-0.0527024	0.303884	-0.0561331	0.0511732
Lhx6	mRNA	Lhx6	non_specific	neuron	cholinergic_neuron	brain	striatum					A. Maegawa, K. Murata, K. Kuroda, S. Fujieda, Y. Fukazawa, Cellular Profiles of Prodynorphin and Preproenkephalin mRNA-Expressing Neurons in the Anterior Olfactory Tubercle of Mice, Front Neural Circuits. 16 (2022) 908964. 10.3389/fncir.2022.908964.	-0.0145013	0.265593	-0.0153664	-0.0137003	-0.0150525	-0.0117435	-0.0153664	-0.0153664	-0.0153664	-0.0153664	-0.0153664	-0.0137096	-0.0153664	-0.00854927	-0.0115927	-0.0153664	-0.0153664	-0.0153664	-0.0153664	-0.0105069	-0.0153664	-0.0153664	-0.0153664	-0.0153664	-0.00858089	-0.0153664	-0.0153664	-0.0153664	-0.0153664	-0.0153664	-0.00504125	-0.0153664	-0.0153664	0.23691	-0.0153664	-0.0153664	-0.0153664
Er81	mRNA	Etv1	non_specific	neuron	cholinergic_neuron	brain	striatum					A. Maegawa, K. Murata, K. Kuroda, S. Fujieda, Y. Fukazawa, Cellular Profiles of Prodynorphin and Preproenkephalin mRNA-Expressing Neurons in the Anterior Olfactory Tubercle of Mice, Front Neural Circuits. 16 (2022) 908964. 10.3389/fncir.2022.908964.	0.0830684	-0.229817	0.210149	-0.272654	0.294502	0.419345	0.170944	0.129429	0.442983	-0.315639	0.464179	-0.318302	-0.317171	-0.322868	-0.246313	0.199764	-0.332194	-0.322784	-0.209157	-0.31643	-0.295041	-0.300069	1.16545	0.120497	-0.327507	-0.325627	-0.207446	-0.247884	-0.303294	-0.154819	-0.225204	-0.329573	0.299883	-0.20299	-0.314572	-0.313796	-0.17859
Choline_acetyltransferase	mRNA	Chat	non_specific	neuron	cholinergic_neuron	brain	brain					A. Maegawa, K. Murata, K. Kuroda, S. Fujieda, Y. Fukazawa, Cellular Profiles of Prodynorphin and Preproenkephalin mRNA-Expressing Neurons in the Anterior Olfactory Tubercle of Mice, Front Neural Circuits. 16 (2022) 908964. 10.3389/fncir.2022.908964.	-0.105078	-0.103145	-0.119307	0.116472	-0.119382	-0.102828	-0.123261	-0.107915	-0.114722	-0.0471232	-0.118222	0.211951	0.149731	-0.0968677	-0.0482942	-0.106525	0.128423	-0.071404	-0.0387105	0.389628	0.289221	-0.0276962	-0.113956	-0.0478947	-0.124756	0.409736	-0.0875778	0.082214	-0.107257	-0.117132	-0.109587	-0.13223	-0.111352	-0.0798963	0.733575	-0.116567	-0.125527
VAChT	mRNA	Slc18a3	non_specific	neuron	cholinergic_neuron	brain	striatum					A. Maegawa, K. Murata, K. Kuroda, S. Fujieda, Y. Fukazawa, Cellular Profiles of Prodynorphin and Preproenkephalin mRNA-Expressing Neurons in the Anterior Olfactory Tubercle of Mice, Front Neural Circuits. 16 (2022) 908964. 10.3389/fncir.2022.908964.	-0.0242766	-0.0197518	-0.0443302	-0.0100535	-0.0340457	-0.0211854	-0.0369513	-0.0253343	-0.0260347	-0.0280826	-0.0382659	0.000819232	0.00355619	-0.0382669	-0.0377784	-0.040529	-0.0314086	-0.0173181	-0.00722566	0.0128334	0.00637238	-0.038131	-0.0361095	0.000870493	-0.0256861	-0.0272955	-0.0226954	-0.0274352	-0.0429468	-0.0235678	-0.0374048	-0.0352131	-0.00387042	-0.0276076	-0.0123392	-0.00410894	-0.0378805
POMC	mRNA	Pomc	Mus musculus	neuron		brain	arcuate_nucleus					S.T. Hentges, V. Otero-Corchon, R.L. Pennock, C.M. King, M.J. Low, Proopiomelanocortin expression in both GABA and glutamate neurons, J Neurosci. 29 (2009) 13684-90. 10.1523/JNEUROSCI.3770-09.2009.	-0.0698354	0.195998	-0.0743332	0.0563942	-0.0700637	-0.0611486	-0.0765684	-0.0660649	-0.0635326	0.0432661	-0.0686841	0.0328498	0.0751909	0.00263632	0.0824135	-0.0718423	0.0755312	0.060033	0.0674121	0.0527585	0.0854952	0.102844	-0.0506086	0.104198	0.067253	0.0728931	-0.0955482	-0.00166473	0.0343902	-0.0704358	0.172009	0.0363498	-0.0518473	0.119756	0.0912691	-0.00798992	-0.0513676
Sox9	nuclear_mRNA	Sox9	Mus musculus	astrocyte		brain	brain	tanycyte			adult and outside neurogenic zones	W. Sun, A. Cornwell, J. Li, S. Peng, M.J. Osorio, N. Aalling, et al., SOX9 Is an Astrocyte-Specific Nuclear Marker in the Adult Brain Outside the Neurogenic Regions, J Neurosci. 37 (2017) 4493-507. 10.1523/JNEUROSCI.3199-16.2017.	0.979712	-0.0559101	-0.156221	-0.150941	-0.145203	0.160379	-0.14255	0.979734	-0.143276	-0.157616	-0.155176	-0.162917	-0.13584	-0.155433	-0.14558	-0.146247	-0.171798	-0.122637	-0.157363	-0.157087	-0.161599	-0.136864	-0.153189	-0.157969	-0.156752	-0.17337	1.04449	-0.00336827	-0.150191	-0.149877	-0.120204	-0.168346	0.239698	-0.0472738	-0.126098	-0.116311	0.822113
Dlx2	mRNA	Dlx2	Mus musculus	neuron	inhibitory_neuron	brain	medial_prefrontal_cortex					A.T. Lee, D. Vogt, J.L. Rubenstein, V.S. Sohal, A class of GABAergic neurons in the prefrontal cortex sends long-range projections to the nucleus accumbens and elicits acute avoidance behavior, J Neurosci. 34 (2014) 11519-25. 10.1523/JNEUROSCI.1157-14.2014.	-0.00446867	-0.00446867	-0.00446867	-0.00404993	-0.00446867	-0.00446867	-0.00446867	-0.00446867	-0.00446867	-0.00446867	-0.00446867	-0.00446867	-0.00446867	-0.00446867	-0.00446867	-0.00446867	-0.00446867	-0.00446867	-0.00446867	-0.00446867	-0.00446867	-0.00446867	-0.00446867	-0.00446867	-0.00446867	-0.00446867	-0.00446867	0.00506848	0.00546626	-0.00446867	-0.00446867	-0.00446867	-0.00446867	-0.00446867	-0.00446867	-0.00446867	-0.00446867
Parvalbumin	protein	Pvalb	Mus musculus	neuron	inhibitory_neuron	brain	medial_prefrontal_cortex	glycinergic_neuron				A.T. Lee, D. Vogt, J.L. Rubenstein, V.S. Sohal, A class of GABAergic neurons in the prefrontal cortex sends long-range projections to the nucleus accumbens and elicits acute avoidance behavior, J Neurosci. 34 (2014) 11519-25. 10.1523/JNEUROSCI.1157-14.2014.	-0.0994485	0.00636315	-0.0336794	0.0752718	-0.0652097	-0.0529464	-0.0460261	-0.102599	-0.0754765	0.210946	-0.0906857	-0.122174	-0.13057	0.00656692	-0.168034	-0.024236	0.44719	-0.150553	-0.15098	0.0911902	-0.0659259	0.24033	-0.0702959	-0.175303	-0.134656	0.0168339	-0.0788304	0.18477	-0.128876	-0.116719	0.649469	0.222418	-0.0785991	0.016262	1.64698	0.657056	-0.0925845
Dlx1	mRNa	Dlx1	Mus musculus	neuron	inhibitory_neuron	brain	medial_prefrontal_cortex					A.T. Lee, D. Vogt, J.L. Rubenstein, V.S. Sohal, A class of GABAergic neurons in the prefrontal cortex sends long-range projections to the nucleus accumbens and elicits acute avoidance behavior, J Neurosci. 34 (2014) 11519-25. 10.1523/JNEUROSCI.1157-14.2014.	-0.0204639	-0.0317277	-0.0317277	-0.0189888	-0.0197796	-0.0117695	-0.0213023	-0.019489	-0.0200589	-0.0150196	-0.0154689	-0.016792	-0.0252263	-0.0030866	-0.0279479	-0.0317277	-0.0275635	-0.0231828	-0.0270158	-0.0317277	-0.0222483	-0.0249658	-0.0205379	-0.0201838	-0.0317277	-0.0174882	-0.0241851	-0.0126015	0.00812023	-0.0117442	-0.0317277	0.000152748	-0.0192349	-0.0317277	-0.00903173	0.0109	0.04336
VIP	protein	Vip	Mus musculus	neuron	inhibitory_neuron	brain	medial_prefrontal_cortex					A.T. Lee, D. Vogt, J.L. Rubenstein, V.S. Sohal, A class of GABAergic neurons in the prefrontal cortex sends long-range projections to the nucleus accumbens and elicits acute avoidance behavior, J Neurosci. 34 (2014) 11519-25. 10.1523/JNEUROSCI.1157-14.2014.	-0.0531059	-0.0346374	-0.029109	0.00365514	-0.0349093	-0.0469112	-0.0389376	-0.0525392	-0.0315609	-0.0100648	-0.0296241	0.203179	-0.0452218	-0.0462932	-0.00268458	-0.0291279	-0.057066	-0.048815	-0.048734	-0.0129052	0.0575679	-0.0489496	-0.0347529	-0.0504863	-0.0542226	-0.0566355	-0.0602949	-0.0294744	0.0571228	-0.0307401	-0.0374067	-0.0678647	-0.0564806	-0.0425048	-0.0454539	-0.0678647	-0.0377214
Mal	mRNA	Mal	Mus musculus	oligodendrocyte	myelinating_OL	brain	brain					M. Vanlandewijck, L. He, M.A. Mae, J. Andrae, K. Ando, F. Del Gaudio, et al., A molecular atlas of cell types and zonation in the brain vasculature, Nature. 554 (2018) 475-80. 10.1038/nature25739.	-0.410443	0.464253	-0.301459	-0.474996	0.932277	-0.338492	1.03843	-0.41362	0.990071	-0.491048	0.492396	-0.486974	-0.468804	-0.467952	-0.483445	-0.309285	-0.47329	-0.477887	-0.471108	-0.470114	-0.48228	-0.488836	-0.416837	-0.483402	-0.459799	-0.474236	-0.417907	-0.380733	-0.469776	1.00681	-0.481068	-0.467305	-0.332114	0.388985	-0.478093	-0.477231	-0.447022
GAT3	mRNA	Slc6a11	Mus musculus	astrocyte		brain	brain					M. Vanlandewijck, L. He, M.A. Mae, J. Andrae, K. Ando, F. Del Gaudio, et al., A molecular atlas of cell types and zonation in the brain vasculature, Nature. 554 (2018) 475-80. 10.1038/nature25739.	2.2794	-0.25563	-0.331354	-0.286883	-0.334588	-0.194945	-0.32961	2.42635	-0.338374	-0.31854	-0.340187	-0.31887	-0.232079	-0.324387	-0.253467	-0.31132	-0.278594	-0.157928	-0.295398	-0.251793	-0.295518	-0.320152	-0.286961	-0.218079	-0.249119	-0.3344	1.51247	-0.162317	-0.236581	-0.337432	-0.35842	-0.356786	-0.284812	-0.213368	-0.364448	-0.271298	-0.312542
Slc7a10	mRNA	Slc7a10	Mus musculus	astrocyte		brain	brain					M. Vanlandewijck, L. He, M.A. Mae, J. Andrae, K. Ando, F. Del Gaudio, et al., A molecular atlas of cell types and zonation in the brain vasculature, Nature. 554 (2018) 475-80. 10.1038/nature25739.	2.13857	-0.245709	-0.298901	-0.303256	-0.288373	-0.0400274	-0.286715	2.39044	-0.289458	-0.309035	-0.291183	-0.30489	-0.303436	-0.307084	-0.303236	-0.27937	-0.309067	-0.303476	-0.303936	-0.309801	-0.300016	-0.310451	-0.142238	-0.301941	-0.301626	-0.313154	0.69804	-0.202136	-0.289544	-0.283551	-0.308565	-0.305865	-0.194353	-0.218219	-0.30958	-0.302965	0.733868
Slc4a4	mRNA	Slc4a4	Mus musculus	astrocyte		brain	brain	meningeal_fibroblast				M. Vanlandewijck, L. He, M.A. Mae, J. Andrae, K. Ando, F. Del Gaudio, et al., A molecular atlas of cell types and zonation in the brain vasculature, Nature. 554 (2018) 475-80. 10.1038/nature25739.	2.42529	-0.368785	-0.434988	-0.260147	-0.436695	-0.0860703	-0.434811	2.45967	-0.433852	-0.267714	-0.443318	-0.307695	0.190048	-0.133745	-0.372011	-0.403726	-0.397696	-0.397312	-0.308252	-0.339615	-0.288789	-0.348007	-0.205526	-0.145889	-0.439667	-0.42669	2.34551	-0.170346	-0.120471	-0.454546	-0.388326	-0.293374	-0.161151	-0.281146	-0.452107	-0.0678983	-0.38025
Fgfr3	mRNA	Fgfr3	Mus musculus	astrocyte		brain	brain					M. Vanlandewijck, L. He, M.A. Mae, J. Andrae, K. Ando, F. Del Gaudio, et al., A molecular atlas of cell types and zonation in the brain vasculature, Nature. 554 (2018) 475-80. 10.1038/nature25739.	2.13277	-0.161106	-0.291534	-0.298742	-0.282943	-0.110606	-0.279475	2.27573	-0.288464	-0.304383	-0.28513	-0.304041	-0.297259	-0.296781	-0.302605	-0.271841	-0.299935	-0.297628	-0.298705	-0.304853	-0.305368	-0.300161	-0.136248	-0.303276	-0.295291	-0.303651	1.3932	-0.172969	-0.281279	-0.26808	-0.296572	-0.294721	-0.183311	-0.107102	-0.301286	-0.312312	-0.198101
Mobp	mRNA	Mobp	Mus musculus	oligodendrocyte	myelinating_OL	brain	brain					M. Vanlandewijck, L. He, M.A. Mae, J. Andrae, K. Ando, F. Del Gaudio, et al., A molecular atlas of cell types and zonation in the brain vasculature, Nature. 554 (2018) 475-80. 10.1038/nature25739.	-0.553062	-0.515619	-0.535176	-0.624506	1.26317	-0.4509	1.14318	-0.561714	1.39586	-0.639883	1.34025	-0.636884	-0.621853	-0.63175	-0.62804	-0.53559	-0.635283	-0.63468	-0.630968	-0.637025	-0.630543	-0.637276	-0.572999	-0.632611	-0.598702	-0.631048	-0.551955	-0.42465	-0.617941	1.16083	-0.626494	-0.611249	-0.485188	-0.449945	-0.631836	-0.650391	-0.556036
Mog	mRNA	Mog	Mus musculus	oligodendrocyte	myelinating_OL	brain	brain					M. Vanlandewijck, L. He, M.A. Mae, J. Andrae, K. Ando, F. Del Gaudio, et al., A molecular atlas of cell types and zonation in the brain vasculature, Nature. 554 (2018) 475-80. 10.1038/nature25739.	-0.580682	-0.583028	-0.52412	-0.599377	1.24026	-0.475324	1.14222	-0.586939	1.35804	-0.615664	1.30635	-0.613588	-0.58693	-0.610061	-0.604793	-0.530579	-0.598949	-0.598087	-0.597111	-0.59211	-0.596115	-0.613187	-0.572863	-0.608541	-0.569776	-0.606513	-0.575069	-0.532958	-0.58687	1.00899	-0.605445	-0.599602	-0.522209	-0.527498	-0.608465	-0.620231	-0.584733
Mbp	mRNA	Mbp	Mus musculus	oligodendrocyte	myelinating_OL	brain	brain	premyelinating_OL				M. Vanlandewijck, L. He, M.A. Mae, J. Andrae, K. Ando, F. Del Gaudio, et al., A molecular atlas of cell types and zonation in the brain vasculature, Nature. 554 (2018) 475-80. 10.1038/nature25739.	-0.627487	-0.568196	-0.550145	-0.670121	1.35184	-0.400411	1.28908	-0.637875	1.38269	-0.709399	1.45387	-0.6961	-0.645251	-0.70867	-0.57879	-0.553016	-0.676531	-0.652937	-0.667094	-0.705355	-0.691697	-0.709528	-0.643154	-0.628514	-0.617492	-0.669708	-0.63641	-0.418859	-0.650631	1.32704	-0.676746	-0.714479	-0.550365	-0.46131	-0.733238	-0.719466	-0.497252
Mag	mRNA	Mag	Mus musculus	oligodendrocyte	myelinating_OL	brain	brain					M. Vanlandewijck, L. He, M.A. Mae, J. Andrae, K. Ando, F. Del Gaudio, et al., A molecular atlas of cell types and zonation in the brain vasculature, Nature. 554 (2018) 475-80. 10.1038/nature25739.	-0.588248	-0.57337	-0.49726	-0.6232	1.27237	-0.45131	1.19439	-0.597211	1.33259	-0.638149	1.37064	-0.634873	-0.63482	-0.632081	-0.625801	-0.504711	-0.621404	-0.626165	-0.615761	-0.623096	-0.633981	-0.632402	-0.608139	-0.631101	-0.581401	-0.636715	-0.590472	-0.497552	-0.622211	1.12572	-0.6361	-0.614944	-0.552485	-0.505826	-0.621918	-0.642279	-0.574851
Plp1	mRNA	Plp1	Mus musculus	oligodendrocyte		brain	brain	ependymal_spinal_cord				M. Vanlandewijck, L. He, M.A. Mae, J. Andrae, K. Ando, F. Del Gaudio, et al., A molecular atlas of cell types and zonation in the brain vasculature, Nature. 554 (2018) 475-80. 10.1038/nature25739.	-0.454987	-0.375372	-0.269418	-0.712971	1.30289	-0.248667	1.23589	-0.458606	1.34893	-0.763806	1.40677	-0.743486	-0.676	-0.743763	-0.713316	-0.280505	-0.724953	-0.69824	-0.697476	-0.71417	-0.731662	-0.754789	-0.445697	-0.683228	-0.642454	-0.733699	-0.467251	-0.301095	-0.681924	1.28015	-0.775036	-0.688848	-0.333297	-0.287216	-0.75765	-0.743182	-0.575071
CD84	mRNA	Cd84	Mus musculus	microglia		brain	brain					M. Vanlandewijck, L. He, M.A. Mae, J. Andrae, K. Ando, F. Del Gaudio, et al., A molecular atlas of cell types and zonation in the brain vasculature, Nature. 554 (2018) 475-80. 10.1038/nature25739.	-0.121487	-0.131374	4.36888	-0.116365	-0.120003	0.090866	-0.126478	-0.124622	-0.122719	-0.119751	-0.123111	-0.116923	-0.125448	-0.116578	-0.11147	4.19488	-0.119534	-0.10989	-0.112871	-0.11711	-0.116758	-0.123285	-0.114659	-0.115725	-0.117817	-0.113775	-0.121677	-0.121715	-0.108168	-0.123806	-0.113995	-0.120066	-0.104701	-0.127297	-0.113262	-0.109875	-0.0218854
Pdgfra	mRNA	Pdgfra	Mus musculus	oligodendrocyte	OPC	brain	brain	fibroblast				M. Vanlandewijck, L. He, M.A. Mae, J. Andrae, K. Ando, F. Del Gaudio, et al., A molecular atlas of cell types and zonation in the brain vasculature, Nature. 554 (2018) 475-80. 10.1038/nature25739.	-0.145465	-0.126638	-0.119267	-0.146054	-0.133453	2.39986	-0.130729	-0.148132	-0.137654	-0.154823	-0.145839	-0.155374	-0.107845	-0.14639	-0.150649	-0.122684	-0.146761	-0.155087	-0.146367	-0.156673	-0.15717	-0.15619	5.7037	-0.158514	-0.153559	-0.158178	-0.148092	-0.099059	-0.0997853	-0.0585427	-0.145719	-0.145706	3.45944	-0.0647489	-0.149023	-0.138431	0.523097
Ehd3	mRNA	Ehd3	Mus musculus	mural	pericyte	brain	brain					M. Vanlandewijck, L. He, M.A. Mae, J. Andrae, K. Ando, F. Del Gaudio, et al., A molecular atlas of cell types and zonation in the brain vasculature, Nature. 554 (2018) 475-80. 10.1038/nature25739.	-0.0837043	-0.0176913	-0.196098	0.0540357	-0.0664848	0.176007	-0.0941541	-0.0945706	-0.0522219	0.119939	-0.00870966	0.0772784	0.000486329	0.0659822	-0.0536252	-0.18585	0.121831	-0.0353169	-0.00967349	0.0591326	0.0404654	-0.000711118	0.546441	-0.0240549	-0.0627581	0.0494524	0.0296589	-0.0177739	-0.0104337	0.0427732	0.355684	0.119998	-0.0304343	0.0129381	0.276518	0.0988453	-0.173731
Mmp2	mRNA	Mmp2	Mus musculus	mural	fibroblast-like	brain	brain					M. Vanlandewijck, L. He, M.A. Mae, J. Andrae, K. Ando, F. Del Gaudio, et al., A molecular atlas of cell types and zonation in the brain vasculature, Nature. 554 (2018) 475-80. 10.1038/nature25739.	-0.0728019	-0.0910685	0.111379	-0.0430122	-0.0446424	0.503357	-0.0744125	-0.0723616	-0.0541059	-0.0536804	0.0449383	-0.0599394	-0.0742258	-0.0664389	-0.0641086	0.103554	0.0383229	-0.0841731	-0.0582354	-0.0316957	-0.0455729	-0.0695805	0.95967	0.0889191	-0.0618638	0.0108354	-0.0910685	-0.0719697	-0.0197482	0.0565539	-0.0585627	-0.0910685	0.638889	-0.0783594	-0.0858688	0.111005	0.902122
Mlc1	mRNA	Mlc1	Mus musculus	astrocyte		brain	brain					M. Vanlandewijck, L. He, M.A. Mae, J. Andrae, K. Ando, F. Del Gaudio, et al., A molecular atlas of cell types and zonation in the brain vasculature, Nature. 554 (2018) 475-80. 10.1038/nature25739.	1.05824	-0.0900168	-0.131936	-0.163875	-0.138689	0.0649259	-0.139451	0.982179	-0.134686	-0.171391	-0.143399	-0.1725	-0.157042	-0.159669	-0.161571	-0.113604	-0.168876	-0.159723	-0.16918	-0.166599	-0.162425	-0.161718	-0.139796	-0.162057	-0.162707	-0.183032	1.498	0.0211863	-0.145536	-0.14807	-0.176448	-0.177832	-0.135571	-0.0577338	-0.15583	-0.165657	-0.0199347
Col23a1	mRNA	Col23a1	Mus musculus	mural	fibroblast-like	brain	brain	tanycyte				M. Vanlandewijck, L. He, M.A. Mae, J. Andrae, K. Ando, F. Del Gaudio, et al., A molecular atlas of cell types and zonation in the brain vasculature, Nature. 554 (2018) 475-80. 10.1038/nature25739.	0.494218	-0.121446	-0.171286	-0.0432467	-0.168652	0.393788	-0.175235	0.270882	-0.167951	-0.129377	-0.164611	-0.0984728	-0.0844009	-0.147915	-0.125118	-0.161103	-0.114671	-0.134335	-0.104292	-0.143229	-0.145847	-0.140535	-0.134561	-0.142361	1.84101	-0.132451	2.23595	-0.118726	0.670161	-0.136	-0.147679	-0.169223	2.23537	-0.104282	-0.161486	-0.113768	-0.0616027
Opalin	mRNA	Opalin	Mus musculus	oligodendrocyte	intermediate_OL	brain	brain	myelinating_OL				M. Vanlandewijck, L. He, M.A. Mae, J. Andrae, K. Ando, F. Del Gaudio, et al., A molecular atlas of cell types and zonation in the brain vasculature, Nature. 554 (2018) 475-80. 10.1038/nature25739.	-0.374525	-0.365538	-0.3343	-0.393681	0.812475	-0.320314	1.23263	-0.378615	0.68756	-0.403148	-0.293548	-0.400651	-0.393406	-0.396044	-0.392556	-0.333267	-0.398499	-0.400121	-0.403473	-0.397672	-0.395521	-0.399319	-0.384155	-0.393898	-0.386524	-0.394532	-0.370352	-0.355682	-0.384093	1.5594	-0.386508	-0.389806	-0.350919	-0.345203	-0.384892	-0.392732	-0.384923
Claudin11	mRNA	Cldn11	Mus musculus	oligodendrocyte		brain	brain					M. Vanlandewijck, L. He, M.A. Mae, J. Andrae, K. Ando, F. Del Gaudio, et al., A molecular atlas of cell types and zonation in the brain vasculature, Nature. 554 (2018) 475-80. 10.1038/nature25739.	-0.406217	-0.36124	-0.317603	-0.44	0.880488	-0.253633	0.819837	-0.408477	1.02459	-0.451272	0.745813	-0.449161	-0.440273	-0.445127	-0.43839	-0.318524	-0.446611	-0.442715	-0.434124	-0.443823	-0.440009	-0.442039	-0.378591	-0.458616	-0.417154	-0.444029	-0.419986	-0.310926	-0.454258	1.3479	-0.445799	-0.424837	-0.147158	-0.30012	-0.444783	-0.437742	-0.421518
Cnp	mRNA	Cnp	Mus musculus	oligodendrocyte		brain	brain					M. Vanlandewijck, L. He, M.A. Mae, J. Andrae, K. Ando, F. Del Gaudio, et al., A molecular atlas of cell types and zonation in the brain vasculature, Nature. 554 (2018) 475-80. 10.1038/nature25739.	-0.272932	-0.361955	-0.243438	-0.379177	0.729534	-0.218609	0.715722	-0.282937	0.771907	-0.373767	0.647881	-0.3787	-0.379035	-0.387139	-0.398237	-0.236831	-0.384806	-0.382417	-0.389675	-0.383565	-0.390426	-0.398969	-0.295236	-0.380344	-0.37413	-0.385117	-0.213655	-0.255573	-0.362922	1.05515	-0.387653	-0.401391	-0.291807	-0.354392	-0.409376	-0.395243	-0.282443
Mcam	mRNA	Mcam	Mus musculus	mural	pericyte	brain	brain	smooth_muscle				M. Vanlandewijck, L. He, M.A. Mae, J. Andrae, K. Ando, F. Del Gaudio, et al., A molecular atlas of cell types and zonation in the brain vasculature, Nature. 554 (2018) 475-80. 10.1038/nature25739.	-0.219583	-0.0799858	-0.216013	-0.216867	0.427607	-0.0333132	0.652724	-0.221753	0.320355	-0.229721	-0.16999	-0.227361	-0.227065	-0.239983	-0.229846	-0.216908	-0.22324	-0.2383	-0.231906	-0.219473	-0.226064	-0.231971	-0.133286	-0.16449	-0.204889	-0.227011	-0.229876	-0.158831	-0.21671	1.30272	-0.202654	-0.21263	-0.201919	0.12632	-0.238279	-0.240601	-0.226584
Nr2f2	mRNA	Nr2f2	Mus musculus	endothelial	venous_endoth	brain	brain					M. Vanlandewijck, L. He, M.A. Mae, J. Andrae, K. Ando, F. Del Gaudio, et al., A molecular atlas of cell types and zonation in the brain vasculature, Nature. 554 (2018) 475-80. 10.1038/nature25739.	0.0523022	0.639177	-0.17461	-0.012964	-0.16483	0.947439	-0.158989	0.0413573	-0.176331	0.00417829	-0.180082	-0.0490639	-0.175788	0.375879	-0.133173	-0.16708	0.177606	-0.153583	-0.10901	0.0185478	-0.0691681	0.0895092	0.0422291	-0.169897	-0.174995	-0.0542784	0.0588772	-0.0252043	-0.0968473	-0.127205	-0.187601	-0.172218	3.96032	0.689754	1.02014	-0.105971	1.24617
Vcam1	mRNA	Vcam1	Mus musculus	endothelial	large_vessels_endoth	brain	brain					M. Vanlandewijck, L. He, M.A. Mae, J. Andrae, K. Ando, F. Del Gaudio, et al., A molecular atlas of cell types and zonation in the brain vasculature, Nature. 554 (2018) 475-80. 10.1038/nature25739.	0.477133	0.752067	-0.0791798	-0.113035	-0.10668	0.476029	-0.10513	0.520738	-0.113866	-0.114925	-0.111282	-0.117346	-0.112096	-0.110304	-0.115855	-0.0839574	-0.113116	-0.108557	-0.119798	-0.117264	-0.10783	-0.12071	-0.100746	-0.110065	-0.111906	-0.123322	0.288058	-0.0908851	-0.110419	-0.116579	-0.121544	-0.115322	2.33876	0.858952	-0.106725	-0.115583	1.15579
Des	mRNA	Des	Mus musculus	mural	pericyte	brain	brain	smooth_muscle				M. Vanlandewijck, L. He, M.A. Mae, J. Andrae, K. Ando, F. Del Gaudio, et al., A molecular atlas of cell types and zonation in the brain vasculature, Nature. 554 (2018) 475-80. 10.1038/nature25739.	-0.0361964	0.243662	-0.0379304	-0.0240919	-0.0360427	0.105495	-0.0360895	-0.0369099	-0.0367628	-0.0201628	-0.0363035	-0.0204105	-0.0314249	-0.0344243	-0.0234018	-0.0379304	-0.0254299	-0.0295085	-0.0251808	-0.0297476	-0.0326584	-0.0324332	-0.0267336	-0.0263998	-0.0311296	-0.0144927	-0.0379304	-0.0379304	-0.0281677	-0.0379304	0.0308472	-0.0379304	0.512093	0.366621	-0.030303	-0.0148342	-0.0229035
Lum	mRNA	Lum	Mus musculus	fibroblast		brain	brain					M. Vanlandewijck, L. He, M.A. Mae, J. Andrae, K. Ando, F. Del Gaudio, et al., A molecular atlas of cell types and zonation in the brain vasculature, Nature. 554 (2018) 475-80. 10.1038/nature25739.	-0.0424699	-0.0119207	-0.0407763	-0.0350901	-0.0359423	0.215754	-0.0370897	-0.042009	-0.040399	-0.0331676	-0.0353044	-0.0378812	-0.0341255	-0.0319916	-0.0420505	-0.0409424	-0.038681	-0.0292038	-0.0425506	-0.0323826	-0.0345212	-0.0407372	-0.0394703	-0.0450727	-0.0450727	-0.0347351	-0.0450727	-0.0354969	-0.0450727	-0.0450727	-0.0450727	-0.0344318	1.67782	0.0920248	-0.0310924	-0.0308446	3.98705e-05
Dcn	mRNA	Dcn	Mus musculus	fibroblast		brain	brain					M. Vanlandewijck, L. He, M.A. Mae, J. Andrae, K. Ando, F. Del Gaudio, et al., A molecular atlas of cell types and zonation in the brain vasculature, Nature. 554 (2018) 475-80. 10.1038/nature25739.	-0.0652852	0.0455493	-0.0790608	-0.0660566	-0.0575453	0.879698	-0.0488767	-0.0735321	-0.0731517	-0.0820207	-0.0710416	-0.0658423	-0.0475079	-0.0822813	-0.0380737	-0.0825397	-0.0894596	-0.0770557	-0.0532063	-0.0698274	-0.08905	-0.0793857	-0.0789857	-0.0509772	-0.0871582	-0.0774531	-0.0477815	0.0735629	-0.0460392	-0.0954589	-0.0839522	-0.0596768	6.04941	0.408008	-0.0680007	-0.0696589	-0.0681288
CD13	mRNA	Anpep	Mus musculus	mural	brain_pericyte	brain	brain					M. Vanlandewijck, L. He, M.A. Mae, J. Andrae, K. Ando, F. Del Gaudio, et al., A molecular atlas of cell types and zonation in the brain vasculature, Nature. 554 (2018) 475-80. 10.1038/nature25739.	-0.0375989	0.117253	-0.0410778	-0.0410932	-0.0409664	0.262259	-0.0435321	-0.0392857	-0.0407005	-0.0398251	-0.0437463	-0.0408925	-0.0453744	-0.0393774	-0.0453744	-0.0412439	-0.0412044	-0.0453744	-0.0453744	-0.0405004	-0.0364702	-0.0453744	-0.0397718	-0.0453744	-0.0453744	-0.0453744	-0.0453744	-0.016646	-0.0453744	-0.035369	-0.0350183	-0.0453744	1.38477	0.154656	-0.0453744	-0.0453744	-0.0303364
Col1a2	mRNA	Col1a2	Mus musculus	mural	fibroblast-like	brain	brain	fibroblast				M. Vanlandewijck, L. He, M.A. Mae, J. Andrae, K. Ando, F. Del Gaudio, et al., A molecular atlas of cell types and zonation in the brain vasculature, Nature. 554 (2018) 475-80. 10.1038/nature25739.	0.716993	-0.00338549	-0.133959	-0.145758	-0.126632	0.536128	-0.139847	0.621224	-0.143876	-0.150051	-0.0726344	-0.142126	-0.151245	-0.154457	-0.134231	-0.123754	-0.141181	-0.146162	-0.142779	-0.156379	-0.143376	-0.145319	-0.149788	-0.143355	-0.145723	-0.146986	1.46934	-0.0847443	-0.144959	-0.149398	-0.157035	-0.152625	3.40704	0.103903	-0.164703	-0.156382	0.0690748
Col3a1	mRNA	Col3a1	Mus musculus	mural	fibroblast-like	brain	brain					M. Vanlandewijck, L. He, M.A. Mae, J. Andrae, K. Ando, F. Del Gaudio, et al., A molecular atlas of cell types and zonation in the brain vasculature, Nature. 554 (2018) 475-80. 10.1038/nature25739.	-0.0497449	0.110908	-0.0582512	-0.0494845	-0.0547828	0.479462	-0.0578827	-0.0546227	-0.0578732	-0.0490362	-0.0547345	-0.0548217	-0.0597306	-0.056749	-0.0449709	-0.0501424	-0.0536623	-0.0625551	-0.0375219	-0.0533333	-0.0401505	-0.0476755	-0.0372984	-0.0523015	-0.0447877	-0.0480202	-0.0474234	-0.0337775	-0.040324	-0.0546058	-0.0564334	-0.0553216	3.33996	0.196569	-0.0442407	0.0013388	-0.0474914
Col5a2	mRNA	Col5a2	Mus musculus	mural	fibroblast-like	brain	brain					M. Vanlandewijck, L. He, M.A. Mae, J. Andrae, K. Ando, F. Del Gaudio, et al., A molecular atlas of cell types and zonation in the brain vasculature, Nature. 554 (2018) 475-80. 10.1038/nature25739.	0.150374	0.299531	-0.123223	-0.0168183	-0.113147	0.462368	-0.127828	0.116965	-0.128592	-0.0217113	-0.0588219	-0.0248095	-0.117821	-0.0019081	-0.0304452	-0.117139	-0.104899	-0.045422	0.19014	-0.104026	0.0234581	0.119354	-0.129694	-0.0694424	-0.119348	-0.104703	0.447008	0.00391355	-0.0715549	-0.115393	-0.135326	-0.0951809	2.61557	0.343439	-0.0576665	0.489044	0.0652605
Col6a1	mRNA	Col6a1	Mus musculus	mural	fibroblast-like	brain	brain					M. Vanlandewijck, L. He, M.A. Mae, J. Andrae, K. Ando, F. Del Gaudio, et al., A molecular atlas of cell types and zonation in the brain vasculature, Nature. 554 (2018) 475-80. 10.1038/nature25739.	-0.16098	-0.0899989	-0.165945	0.149571	-0.159658	0.0325723	-0.161271	-0.159463	-0.159307	0.162689	-0.159071	0.130968	-0.0317976	-0.0456619	-0.008854	-0.153382	0.669541	0.137934	0.591876	0.442376	0.265299	-0.10921	-0.163815	-0.106358	0.395238	-0.0447569	-0.174869	0.0965431	0.278306	-0.160298	-0.135637	0.203781	0.980557	-0.0852772	-0.133706	0.380884	-0.122658
Col6a2	mRNA	Col6a2	Mus musculus	mural	fibroblast-like	brain	brain					M. Vanlandewijck, L. He, M.A. Mae, J. Andrae, K. Ando, F. Del Gaudio, et al., A molecular atlas of cell types and zonation in the brain vasculature, Nature. 554 (2018) 475-80. 10.1038/nature25739.	-0.0928782	-0.0497531	-0.0992337	0.0516634	-0.077051	0.0794555	-0.0994377	-0.094891	-0.0902944	-0.033799	0.0041723	-0.014184	0.105631	0.0204119	0.429694	-0.0987938	-0.0820567	0.143229	0.23633	-0.0828677	0.0544308	0.0603518	-0.0980275	0.159406	0.104556	-0.0515812	-0.0972493	-0.0642786	0.100153	-0.107294	-0.0641905	0.145645	0.97263	-0.0238538	-0.0556672	0.0923549	-0.097044
Col6a3	mRNA	Col6a3	Mus musculus	mural	fibroblast-like	brain	brain					M. Vanlandewijck, L. He, M.A. Mae, J. Andrae, K. Ando, F. Del Gaudio, et al., A molecular atlas of cell types and zonation in the brain vasculature, Nature. 554 (2018) 475-80. 10.1038/nature25739.	-0.110983	-0.0794465	0.0085908	-0.0102188	0.0451027	-0.00636042	0.0611129	-0.110859	0.107583	0.0513138	-0.0724413	-0.0459902	0.0566794	0.00441345	-0.0739002	0.00646321	-0.0666821	-0.0560316	-0.087656	0.0883626	-0.0888815	-0.0825748	-0.0745871	-0.0491875	-0.0551106	-0.068046	-0.122879	-0.0701317	-0.0833478	-0.0623587	0.150049	-0.0215218	0.426155	-0.041156	-0.125832	0.386446	-0.0990487
Col12a1	mRNA	Col12a1	Mus musculus	mural	fibroblast-like	brain	brain					M. Vanlandewijck, L. He, M.A. Mae, J. Andrae, K. Ando, F. Del Gaudio, et al., A molecular atlas of cell types and zonation in the brain vasculature, Nature. 554 (2018) 475-80. 10.1038/nature25739.	-0.1553	-0.160486	-0.17381	0.154567	-0.182085	0.124651	-0.183598	-0.157818	-0.185088	0.0961883	-0.179327	0.287365	0.481502	-0.0320384	-0.0303593	-0.169422	-0.056831	0.46221	0.110083	0.0903656	0.054657	-0.0277166	-0.188535	0.20384	-0.17206	0.00561805	-0.146629	0.0705139	0.139831	-0.186363	1.52487	-0.105419	1.71783	-0.0954676	0.821709	-0.0953807	-0.169647
Col13a1	mRNA	Col13a1	Mus musculus	mural	fibroblast-like	brain	brain					M. Vanlandewijck, L. He, M.A. Mae, J. Andrae, K. Ando, F. Del Gaudio, et al., A molecular atlas of cell types and zonation in the brain vasculature, Nature. 554 (2018) 475-80. 10.1038/nature25739.	-0.0712143	-0.0331255	-0.0787288	-0.00971166	-0.073396	0.398595	-0.0781114	-0.0729894	-0.0752272	-0.0426285	-0.0748705	0.0146256	-0.0642734	0.00887988	-0.0319044	-0.071575	-0.0244057	-0.0532127	0.0349464	-0.02779	0.0053888	-0.0552756	-0.0774179	-0.0146485	-0.0794233	-0.0309628	-0.0755218	-0.0734294	-0.0772409	-0.0830415	-0.0565615	0.732265	3.12199	0.0312499	-0.0697659	0.14954	-0.0679471
Col15a1	mRNA	Col15a1	Mus musculus	mural	fibroblast-like	brain	brain					M. Vanlandewijck, L. He, M.A. Mae, J. Andrae, K. Ando, F. Del Gaudio, et al., A molecular atlas of cell types and zonation in the brain vasculature, Nature. 554 (2018) 475-80. 10.1038/nature25739.	-0.150113	-0.11985	0.797792	-0.0313575	-0.0199393	0.338923	0.0274628	-0.153313	-0.0397872	-0.0371517	-0.115207	-0.0352608	-0.101226	0.0414008	-0.0923754	0.787915	-0.109783	0.181888	-0.0837375	-0.0717007	0.0209751	0.144417	-0.0450066	-0.156408	-0.147793	0.0466649	-0.158607	-0.0566757	0.305964	-0.093461	-0.0997888	-0.157191	2.81538	-0.06055	-0.153266	-0.119828	-0.140806
Col26a1	mRNA	Col26a1	Mus musculus	mural	fibroblast-like	brain	brain					M. Vanlandewijck, L. He, M.A. Mae, J. Andrae, K. Ando, F. Del Gaudio, et al., A molecular atlas of cell types and zonation in the brain vasculature, Nature. 554 (2018) 475-80. 10.1038/nature25739.	-0.351062	-0.293526	-0.356948	0.337731	-0.35975	0.0753647	-0.362737	-0.3529	-0.361243	0.449487	-0.354988	0.447369	0.328412	0.250338	-0.104002	-0.343597	0.614973	0.592207	0.461643	0.184287	0.545706	0.506771	-0.0946753	-0.247373	0.250272	0.997347	-0.352105	-0.0769065	0.0551735	-0.354749	0.462313	-0.157023	1.28288	-0.277144	0.453473	0.144011	-0.333754
Lama1	mRNA	Lama1	Mus musculus	epithelial		brain	brain					M. Vanlandewijck, L. He, M.A. Mae, J. Andrae, K. Ando, F. Del Gaudio, et al., A molecular atlas of cell types and zonation in the brain vasculature, Nature. 554 (2018) 475-80. 10.1038/nature25739.	-0.184913	-0.0456738	-0.203631	0.119564	-0.208684	0.630734	-0.208039	-0.208724	-0.211303	-0.0137605	-0.218832	-0.0667513	0.712081	-0.125516	-0.0285014	-0.190694	0.295098	-0.0104884	-0.18894	0.125661	-0.0137225	-0.128831	0.0923508	-0.0168712	-0.0424316	1.28294	-0.217114	-0.067286	-0.112254	-0.220905	2.95795	-0.193871	4.63739	-0.0098478	-0.214134	0.214286	-0.203581
Efemp1	mRNA	Efemp1	Mus musculus	mesothelial		brain	brain					M. Vanlandewijck, L. He, M.A. Mae, J. Andrae, K. Ando, F. Del Gaudio, et al., A molecular atlas of cell types and zonation in the brain vasculature, Nature. 554 (2018) 475-80. 10.1038/nature25739.	-0.218229	-0.248608	-0.24437	-0.188054	0.370814	0.0730306	0.475222	-0.218539	0.449995	-0.189111	0.0355082	-0.208164	-0.254669	-0.138452	-0.223457	-0.244892	-0.172242	-0.243672	-0.203958	-0.174203	-0.235112	-0.172502	-0.245505	-0.186497	-0.187178	-0.246411	-0.242741	-0.226353	-0.244816	-0.107634	-0.244797	0.0498513	1.79305	-0.189159	0.454745	-0.233489	-0.229341
Bmx	mRNA	Bmx	Mus musculus	endothelial	arterial_endoth	brain	brain					M. Vanlandewijck, L. He, M.A. Mae, J. Andrae, K. Ando, F. Del Gaudio, et al., A molecular atlas of cell types and zonation in the brain vasculature, Nature. 554 (2018) 475-80. 10.1038/nature25739.	-0.0245836	0.380664	-0.0332494	-0.0209032	-0.0304191	0.0298954	-0.0314093	-0.0271291	-0.0274141	-0.0281375	-0.0316233	-0.0208861	-0.0186801	-0.0263129	-0.0192672	-0.0332494	-0.0124249	-0.0247032	0.0158122	-0.0332494	-0.0152097	-0.0233236	-0.0220578	-0.00438505	-0.0332494	-0.0238512	-0.0181618	-0.0236848	0.00504299	-0.0332494	-0.0332494	-0.0332494	0.0167294	0.548022	-0.0122999	-0.0109037	-0.00625819
Sema3g	mRNA	Sema3g	Mus musculus	endothelial	arterial_endoth	brain	brain					M. Vanlandewijck, L. He, M.A. Mae, J. Andrae, K. Ando, F. Del Gaudio, et al., A molecular atlas of cell types and zonation in the brain vasculature, Nature. 554 (2018) 475-80. 10.1038/nature25739.	-0.0349005	0.751147	-0.042707	-0.0140099	-0.0417627	0.00964413	-0.0420931	-0.0355599	-0.0403707	-0.00866831	-0.042707	0.00261272	-0.0361985	-0.0290381	-0.00865114	-0.042707	-0.032824	-0.0145326	-0.0253681	-0.00581911	-0.021406	0.00179677	-0.042707	-0.00135979	-0.0170783	0.020672	-0.042707	-0.0235598	-0.042707	-0.042707	-0.0333161	-0.0136755	-0.042707	0.904684	-0.00876636	-0.0269406	-0.042707
VWF	mRNA	Vwf	Mus musculus	endothelial	large_venous_endoth	brain	brain	activated_endothelial				M. Vanlandewijck, L. He, M.A. Mae, J. Andrae, K. Ando, F. Del Gaudio, et al., A molecular atlas of cell types and zonation in the brain vasculature, Nature. 554 (2018) 475-80. 10.1038/nature25739.	-0.0477083	2.37251	-0.0399508	-0.0393353	-0.0540046	0.153363	-0.0549067	-0.0547592	-0.0561068	-0.00238043	-0.0528469	-0.0551717	-0.0557069	-0.0482405	-0.0529165	-0.035243	-0.0437426	-0.0454057	-0.0385176	-0.0558031	-0.0559669	-0.0459384	-0.0158931	-0.0652394	-0.0457915	-0.0558226	-0.0432647	0.00192612	-0.0399511	0.412023	-0.0299756	-0.0590739	-0.0310896	2.43807	-0.021857	-0.0370962	-0.0406417
Gkn3	mRNA	Gkn3	Mus musculus	endothelial	arterial_endoth	brain	brain					M. Vanlandewijck, L. He, M.A. Mae, J. Andrae, K. Ando, F. Del Gaudio, et al., A molecular atlas of cell types and zonation in the brain vasculature, Nature. 554 (2018) 475-80. 10.1038/nature25739.	-0.0228514	0.22355	-0.024583	-0.0216652	-0.023012	0.0406882	-0.0221317	-0.024583	-0.024583	-0.0228354	-0.024583	-0.0229247	-0.024583	-0.024583	-0.0210297	-0.024583	-0.0204217	-0.021274	-0.024583	-0.0197191	-0.024583	-0.0190931	-0.024583	-0.024583	-0.024583	0.0010541	-0.0170458	-0.0054704	-0.024583	-0.024583	-0.024583	-0.024583	-0.024583	0.581437	-0.024583	-0.0103839	-0.024583
Tfrc	mRNA	Tfrc	Mus musculus	endothelial	venous_capillary_endoth	brain	brain					M. Vanlandewijck, L. He, M.A. Mae, J. Andrae, K. Ando, F. Del Gaudio, et al., A molecular atlas of cell types and zonation in the brain vasculature, Nature. 554 (2018) 475-80. 10.1038/nature25739.	-0.228183	2.12011	-0.425311	0.306849	-0.340764	-0.260248	-0.334488	-0.217113	-0.349425	0.486233	-0.352599	0.339711	0.14847	0.295251	0.105338	-0.402794	0.540043	0.134394	0.0526664	0.512897	0.267446	0.239527	-0.265652	0.0719089	0.355937	0.464757	-0.319559	-0.0419267	0.220448	-0.28329	0.699493	0.0815728	-0.435395	1.6646	0.288867	0.484578	-0.331833
Mfsd2a	mRNA_protein	Mfsd2a	Mus musculus	endothelial	capillary_endoth	brain	brain					M. Vanlandewijck, L. He, M.A. Mae, J. Andrae, K. Ando, F. Del Gaudio, et al., A molecular atlas of cell types and zonation in the brain vasculature, Nature. 554 (2018) 475-80. 10.1038/nature25739.	0.912904	1.97982	-0.169045	-0.183871	-0.118617	0.216241	-0.106304	1.04045	-0.123797	-0.184855	-0.137424	-0.181163	-0.17815	-0.190261	-0.185484	-0.161816	-0.196937	-0.168762	-0.179631	-0.190194	-0.184455	-0.18543	0.642898	-0.172722	-0.184481	-0.197047	0.19932	-0.115404	-0.177074	0.127025	-0.196681	-0.206252	-0.0935462	1.62044	-0.195273	-0.186362	-0.130544
Slc6a6	mRNA	Slc6a6	Mus musculus	endothelial		brain	brain					M. Vanlandewijck, L. He, M.A. Mae, J. Andrae, K. Ando, F. Del Gaudio, et al., A molecular atlas of cell types and zonation in the brain vasculature, Nature. 554 (2018) 475-80. 10.1038/nature25739.	-0.679269	2.22714	0.0902451	0.0842913	0.14452	-0.422269	0.0340713	-0.718056	0.173513	0.0687099	0.357153	0.0618685	0.0481798	0.0789648	0.140055	0.0752605	0.121959	0.266231	0.17251	0.113595	0.0504807	0.127215	-0.556246	0.14201	0.0277134	0.0391403	-0.456117	-0.350617	0.139367	0.171722	-0.24791	0.197422	-0.470496	1.92168	0.0955732	0.0206312	-0.705791
Slc7a5	mRNA	Slc7a5	Mus musculus	endothelial		brain	brain					M. Vanlandewijck, L. He, M.A. Mae, J. Andrae, K. Ando, F. Del Gaudio, et al., A molecular atlas of cell types and zonation in the brain vasculature, Nature. 554 (2018) 475-80. 10.1038/nature25739.	0.167944	4.99127	0.0921452	0.00234672	-0.171531	-0.00523201	-0.170384	0.170264	-0.174236	0.0115143	-0.171917	-0.0257511	-0.00831121	0.10962	-0.0413295	0.0993751	-0.0131451	0.0442787	-0.0212399	-0.0436217	-0.0212861	-0.00354958	0.0143711	-0.0233578	-0.0235266	-0.00926782	0.124099	-0.0330512	-0.0102098	-0.183271	0.0334568	0.0444456	-0.0398906	4.06461	-0.0122407	0.204831	-0.0576005
Tagln	mRNA	Tagln	Mus musculus	mural	smooth_muscle_arteriole	brain	brain					M. Vanlandewijck, L. He, M.A. Mae, J. Andrae, K. Ando, F. Del Gaudio, et al., A molecular atlas of cell types and zonation in the brain vasculature, Nature. 554 (2018) 475-80. 10.1038/nature25739.	-0.0287782	0.143941	-0.0508431	-0.0246507	-0.0349782	0.132221	-0.0386315	-0.0291239	-0.0344357	-0.028894	-0.0284541	-0.0330435	-0.0235227	-0.0285526	-0.0229867	-0.0445406	-0.018864	-0.0334526	-0.0186144	-0.0269316	-0.0245494	-0.0162407	-0.0388835	-0.0170779	-0.0229058	-0.0346043	-0.0331746	0.0215398	-0.0290627	-0.0332864	-0.025711	-0.0412254	0.0615944	0.957948	0.0287545	-0.0422116	-0.0265114
VEGFC	mRNA	Vegfc	Mus musculus	endothelial	arterial_endoth	brain	brain	beta_tanycyte				M. Vanlandewijck, L. He, M.A. Mae, J. Andrae, K. Ando, F. Del Gaudio, et al., A molecular atlas of cell types and zonation in the brain vasculature, Nature. 554 (2018) 475-80. 10.1038/nature25739.	-0.159505	0.324482	-0.215507	0.182858	-0.222997	0.0909837	-0.21973	-0.158895	-0.228608	0.11712	-0.227627	0.274439	-0.0741541	0.121138	0.194785	-0.202683	0.346159	0.279395	0.561874	0.208341	0.228472	0.0872186	0.0570042	-0.0798576	0.20889	0.0942747	-0.173882	-0.0409417	0.292211	-0.219451	0.145241	0.618435	0.387965	0.428467	0.735593	-0.115589	0.274624
Col11a1	mRNA	Col11a1	Mus musculus	mural	fibroblast-like	brain	brain					M. Vanlandewijck, L. He, M.A. Mae, J. Andrae, K. Ando, F. Del Gaudio, et al., A molecular atlas of cell types and zonation in the brain vasculature, Nature. 554 (2018) 475-80. 10.1038/nature25739.	-0.216987	-0.417467	-0.487013	0.415512	-0.491895	-0.0464789	-0.487787	-0.288494	-0.492761	0.888257	-0.500657	0.687415	-0.0134627	0.29044	0.110763	-0.458095	0.252806	-0.0427155	0.18261	0.54274	0.516845	0.88914	0.390939	0.0661727	-0.165247	-0.048343	0.239099	0.0869631	0.318315	-0.409286	-0.413854	-0.132076	-0.252249	-0.384935	2.36577	0.656164	-0.453082
Col16a1	mRNA	Col16a1	Mus musculus	mural	fibroblast-like	brain	brain					M. Vanlandewijck, L. He, M.A. Mae, J. Andrae, K. Ando, F. Del Gaudio, et al., A molecular atlas of cell types and zonation in the brain vasculature, Nature. 554 (2018) 475-80. 10.1038/nature25739.	-0.00178637	-0.300667	-0.334716	0.028854	-0.00677926	-0.0320154	-0.195817	0.024212	-0.0588969	0.247569	0.595726	-0.0681461	-0.173945	-0.190249	-0.0613864	-0.317643	-0.0267192	-0.0752401	-0.0669604	0.618596	-0.0169786	0.479838	0.243137	-0.228653	0.0582907	0.0443649	-0.113422	-0.0932514	-0.244796	-0.121056	-0.323592	-0.302543	-0.141476	-0.265616	0.791358	-0.24109	-0.307899
Col8a1	mRNA	Col8a1	Mus musculus	mural	fibroblast-like	brain	brain					M. Vanlandewijck, L. He, M.A. Mae, J. Andrae, K. Ando, F. Del Gaudio, et al., A molecular atlas of cell types and zonation in the brain vasculature, Nature. 554 (2018) 475-80. 10.1038/nature25739.	-0.184656	-0.116406	-0.197776	0.08569	-0.194461	0.851839	-0.197831	-0.197225	-0.1952	0.0500469	-0.195336	0.316425	-0.0486547	-0.0330813	0.0285426	-0.191621	0.00063639	0.080289	-0.0189134	0.260702	0.125095	0.0374631	-0.198056	0.202919	0.236131	0.0597538	-0.17778	-0.104365	0.510619	-0.193329	0.0876977	-0.176289	1.66087	-0.0285693	-0.184196	-0.0681872	5.70429
Col8a2	mRNA	Col8a2	Mus musculus	mural	fibroblast-like	brain	brain					M. Vanlandewijck, L. He, M.A. Mae, J. Andrae, K. Ando, F. Del Gaudio, et al., A molecular atlas of cell types and zonation in the brain vasculature, Nature. 554 (2018) 475-80. 10.1038/nature25739.	-0.0663549	-0.0706005	-0.0884067	-0.0185009	-0.0862471	0.610496	-0.086086	-0.0714857	-0.0878443	-0.0242913	-0.0929178	0.000482795	-0.0329346	-0.0537286	-0.0461763	-0.0874376	-0.00637545	-0.0297603	-0.0472282	0.0115515	0.00204864	-0.00246627	-0.0822321	-0.0527269	0.049498	0.0169661	-0.076091	-0.0681678	0.0374663	-0.081537	0.0210702	-0.046913	0.496984	-0.0577527	-0.00126993	-0.06088	3.77744
Col5a3	mRNA	Col5a3	Mus musculus	mural	fibroblast-like	brain	brain					M. Vanlandewijck, L. He, M.A. Mae, J. Andrae, K. Ando, F. Del Gaudio, et al., A molecular atlas of cell types and zonation in the brain vasculature, Nature. 554 (2018) 475-80. 10.1038/nature25739.	0.514823	-0.0673239	-0.160255	-0.115975	-0.0856181	0.481947	-0.101151	0.598855	-0.0814095	-0.132263	-0.0548182	-0.136498	-0.149516	-0.147858	-0.108764	-0.150625	-0.15454	-0.127245	-0.0978258	-0.144724	-0.132351	-0.139308	0.911346	-0.0411386	-0.150539	-0.107383	0.0083514	-0.0876732	-0.123181	-0.0803113	0.0441308	-0.153177	0.366425	-0.0884456	-0.133747	-0.152558	-0.123212
Pdgfrb	mRNA	Pdgfrb	Mus musculus	mural		brain	brain	pericyte	fibroblas			M. Vanlandewijck, L. He, M.A. Mae, J. Andrae, K. Ando, F. Del Gaudio, et al., A molecular atlas of cell types and zonation in the brain vasculature, Nature. 554 (2018) 475-80. 10.1038/nature25739.	0.592646	0.797671	-0.126958	-0.138738	-0.14564	0.73086	-0.148399	0.588316	-0.150949	-0.144075	-0.143382	-0.14397	-0.142373	-0.143232	-0.13743	-0.119735	-0.136942	-0.14071	-0.136559	-0.14151	-0.141403	-0.139375	-0.145995	-0.139029	-0.141761	-0.132566	0.633847	-0.11745	-0.136544	-0.150526	-0.141113	-0.149203	2.03472	0.784763	-0.136757	-0.144221	-0.0880289
Kcnj8	mRNA	Kcnj8	Mus musculus	mural	pericyte	brain	brain					M. Vanlandewijck, L. He, M.A. Mae, J. Andrae, K. Ando, F. Del Gaudio, et al., A molecular atlas of cell types and zonation in the brain vasculature, Nature. 554 (2018) 475-80. 10.1038/nature25739.	-0.0373226	0.714143	-0.0398917	-0.0448087	-0.0434339	0.246957	-0.0448018	-0.0448035	-0.0422669	-0.047368	-0.0467676	-0.0391986	-0.0474245	-0.0407552	-0.0485296	-0.0403903	-0.0369986	-0.0527909	-0.0381977	-0.0477422	-0.0487564	-0.0527909	-0.0471842	-0.0479042	-0.0481987	-0.0447613	-0.0301154	-0.0240413	-0.045789	-0.0342984	-0.0435018	-0.0527909	0.187856	0.533626	-0.0527909	-0.0527909	-0.0527909
Endosialin	mRNA	Cd248	Mus musculus	mural	pericyte	brain	brain					M. Vanlandewijck, L. He, M.A. Mae, J. Andrae, K. Ando, F. Del Gaudio, et al., A molecular atlas of cell types and zonation in the brain vasculature, Nature. 554 (2018) 475-80. 10.1038/nature25739.	-0.0314438	0.5024	-0.04272	-0.0355244	-0.0354815	0.141251	-0.0371946	-0.0345518	-0.0392155	-0.0400235	-0.028071	-0.0352091	-0.0394657	-0.04272	-0.0369304	-0.04272	-0.0385511	-0.00557384	-0.04272	-0.04272	-0.0394514	-0.0305203	0.0223218	-0.0321434	-0.0297246	-0.0365274	-0.0276181	-0.04272	-0.0150157	-0.0327173	-0.0323667	-0.04272	0.332426	0.43243	-0.0192029	-0.04272	-0.012652
Abcc9	mRNA	Abcc9	Mus musculus	mural	smooth_muscle_venous	brain	brain	pericyte				M. Vanlandewijck, L. He, M.A. Mae, J. Andrae, K. Ando, F. Del Gaudio, et al., A molecular atlas of cell types and zonation in the brain vasculature, Nature. 554 (2018) 475-80. 10.1038/nature25739.	-0.0969509	1.06366	-0.0744879	0.00033172	-0.0998613	0.527506	-0.101443	-0.103534	-0.104487	-0.0657905	-0.101154	0.0919281	0.108709	-0.102838	0.205705	-0.0773214	-0.104322	0.00727877	0.0609341	-0.0923412	0.152518	-0.071165	-0.0774881	0.177423	-0.0933612	-0.0824881	-0.104669	-0.0508406	-0.103354	-0.118771	-0.0908325	-0.105855	0.679503	0.832742	-0.106166	-0.0984632	-0.0943826
Vtn	mRNA	Vtn	Mus musculus	mural	pericyte	brain	brain					M. Vanlandewijck, L. He, M.A. Mae, J. Andrae, K. Ando, F. Del Gaudio, et al., A molecular atlas of cell types and zonation in the brain vasculature, Nature. 554 (2018) 475-80. 10.1038/nature25739.	-0.0492546	1.78127	-0.0521434	-0.0877051	-0.0642541	0.910153	-0.0639417	-0.0610237	-0.0690456	-0.0934034	-0.0736094	-0.0887658	-0.0836142	-0.0956141	-0.086142	-0.0587855	-0.0952013	-0.0924524	-0.0829482	-0.0852476	-0.080805	-0.0857873	-0.0827783	-0.102899	-0.0826204	-0.0898301	-0.0422315	0.130004	-0.0793111	-0.077866	-0.102965	-0.0906165	2.43203	1.79082	-0.107761	-0.0964619	-0.0400361
Higd1b	mRNA	Higd1b	Mus musculus	mural	pericyte	brain	brain					M. Vanlandewijck, L. He, M.A. Mae, J. Andrae, K. Ando, F. Del Gaudio, et al., A molecular atlas of cell types and zonation in the brain vasculature, Nature. 554 (2018) 475-80. 10.1038/nature25739.	-0.0421468	0.987226	-0.0379709	-0.0363586	-0.040863	0.14929	-0.0398065	-0.0449511	-0.0387993	-0.0402968	-0.0447303	-0.0306418	-0.0300727	-0.0404267	-0.0301534	-0.0427703	-0.0439584	-0.0479219	-0.0389649	-0.0199824	-0.0266882	-0.0420053	-0.0220384	-0.0401864	-0.0293958	-0.0408592	-0.032493	-0.0551739	-0.0482184	-0.0551739	-0.0332418	-0.0364766	-0.0551739	1.00026	-0.0483463	-0.024197	-0.0250686
S1pr3	mRNA	S1pr3	Mus musculus	mural	pericyte	brain	brain					M. Vanlandewijck, L. He, M.A. Mae, J. Andrae, K. Ando, F. Del Gaudio, et al., A molecular atlas of cell types and zonation in the brain vasculature, Nature. 554 (2018) 475-80. 10.1038/nature25739.	0.0380881	0.461626	-0.124408	0.0376476	-0.13313	0.282888	-0.129821	0.0347767	-0.137424	-0.0369222	-0.139018	0.0259182	0.189559	-0.0337753	0.166139	-0.114491	0.00180139	0.130904	0.175246	0.0187324	0.0838047	0.101778	0.277153	0.104896	0.00902081	-0.0233584	0.040908	-0.0857015	0.0641167	-0.122855	-0.118695	0.00247805	0.248181	0.391364	-0.112622	-0.10638	-0.114829
Ifitm1	mRNA	Ifitm1	Mus musculus	mural	pericyte	brain	brain					M. Vanlandewijck, L. He, M.A. Mae, J. Andrae, K. Ando, F. Del Gaudio, et al., A molecular atlas of cell types and zonation in the brain vasculature, Nature. 554 (2018) 475-80. 10.1038/nature25739.	-0.0392766	0.663404	-0.0282005	-0.0358775	-0.0393119	0.151697	-0.0392484	-0.0425405	-0.0426787	-0.0438826	-0.0399198	-0.0320029	-0.047311	-0.0339373	-0.0436823	-0.0290312	-0.0383269	-0.0368522	-0.0402518	-0.0362288	-0.0444144	-0.0325818	-0.0440876	-0.036509	-0.0313246	-0.0306774	-0.0345802	-0.0113715	-0.0108629	-0.0401274	-0.0344989	-0.0202752	0.550498	0.617217	-0.0319815	-0.0235591	0.00899594
Atp13a5	mRNA	Atp13a5	Mus musculus	mural	pericyte	brain	brain					M. Vanlandewijck, L. He, M.A. Mae, J. Andrae, K. Ando, F. Del Gaudio, et al., A molecular atlas of cell types and zonation in the brain vasculature, Nature. 554 (2018) 475-80. 10.1038/nature25739.	0.943762	0.651637	-0.179395	-0.165641	-0.188255	0.535167	-0.188033	0.939908	-0.193833	-0.169748	-0.194774	-0.171927	-0.1689	-0.175466	-0.148367	-0.177368	-0.181277	-0.158972	-0.173861	-0.166223	-0.148365	-0.134171	-0.135923	-0.162968	-0.195454	-0.169075	1.05957	-0.153157	-0.164224	-0.164299	-0.153438	-0.159663	0.535637	0.605831	-0.190546	-0.18389	-0.0636198
Efnb2	mRNA	Efnb2	Mus musculus	endothelial	arterial_endoth	brain	brain					M. Vanlandewijck, L. He, M.A. Mae, J. Andrae, K. Ando, F. Del Gaudio, et al., A molecular atlas of cell types and zonation in the brain vasculature, Nature. 554 (2018) 475-80. 10.1038/nature25739.	-0.199011	0.200677	-0.276631	0.241934	-0.26974	-0.0231743	-0.266317	-0.272027	-0.274707	0.185801	-0.276244	0.121372	0.173078	0.216901	0.330361	-0.256099	0.392297	0.0441581	0.0383888	0.750269	0.0291463	0.471062	-0.252076	0.224553	-0.132049	0.267658	-0.118285	-0.0947297	0.108203	-0.264061	0.21128	0.43689	0.525875	0.202543	1.92176	0.15562	-0.178172
CD48	mRNA	Cd48	Mus musculus	microglia		brain	brain					M. Vanlandewijck, L. He, M.A. Mae, J. Andrae, K. Ando, F. Del Gaudio, et al., A molecular atlas of cell types and zonation in the brain vasculature, Nature. 554 (2018) 475-80. 10.1038/nature25739.	-0.0620265	-0.050631	1.44757	-0.0634337	-0.0634675	0.0774639	-0.0642223	-0.0641731	-0.0672436	-0.0656244	-0.0672436	-0.0647425	-0.0672436	-0.0570668	-0.0599891	1.35076	-0.0672436	-0.064578	-0.0607392	-0.0607192	-0.065189	-0.0672436	-0.0672436	-0.0589637	-0.0672436	-0.0630995	-0.0596743	-0.0576466	-0.0672436	-0.0672436	-0.0617859	-0.0672436	-0.0558594	-0.0545645	-0.059644	-0.0672436	-0.0559431
CD53	mRNA	Cd53	Mus musculus	microglia		brain	brain					M. Vanlandewijck, L. He, M.A. Mae, J. Andrae, K. Ando, F. Del Gaudio, et al., A molecular atlas of cell types and zonation in the brain vasculature, Nature. 554 (2018) 475-80. 10.1038/nature25739.	-0.0759423	-0.0839914	1.89393	-0.0632064	-0.0717406	0.0581248	-0.0738458	-0.0755419	-0.0704781	-0.0645017	-0.0771234	-0.0612555	-0.0678021	-0.0680117	-0.0697051	1.84535	-0.0546704	-0.0481501	-0.0661245	-0.0567332	-0.0670853	-0.0617688	-0.0784057	-0.0817541	-0.0632754	-0.0433298	-0.0839914	-0.0839914	-0.0579914	-0.0666793	-0.0711073	-0.0693039	-0.0617922	-0.0839914	-0.0698409	-0.0822201	-0.0745693
Baiap3	mRNA	Baiap3	Mus musculus	mural	pericyte	brain	brain					M. Vanlandewijck, L. He, M.A. Mae, J. Andrae, K. Ando, F. Del Gaudio, et al., A molecular atlas of cell types and zonation in the brain vasculature, Nature. 554 (2018) 475-80. 10.1038/nature25739.	-0.337937	-0.340912	-0.326887	0.361141	-0.348832	-0.224953	-0.343289	-0.339715	-0.355002	-0.122628	-0.35275	0.150646	1.33796	-0.175267	1.52127	-0.312805	-0.273484	1.84332	0.952921	-0.0367325	0.495962	0.318999	-0.352868	1.76002	-0.249762	-0.1692	-0.332894	0.0699388	0.515732	-0.359897	-0.368384	-0.262143	-0.0534727	-0.318375	-0.362744	-0.350268	-0.317763
Col5a1	mRNA	Col5a1	Mus musculus	mural	fibroblast-like	brain	brain					M. Vanlandewijck, L. He, M.A. Mae, J. Andrae, K. Ando, F. Del Gaudio, et al., A molecular atlas of cell types and zonation in the brain vasculature, Nature. 554 (2018) 475-80. 10.1038/nature25739.	-0.0709315	-0.0755946	-0.130227	0.0794226	-0.128375	0.198604	-0.132516	-0.0813152	-0.126382	0.0299632	-0.12597	-0.0230117	0.0219815	-0.071532	0.0912186	-0.121328	0.121312	0.0955302	0.00993145	0.247345	0.0607761	-0.0172485	0.0398481	0.0759149	-0.126792	0.829981	-0.0368734	0.0065763	-0.0229484	-0.108549	0.603752	0.622129	1.21354	-0.0928426	-0.0461056	-0.109863	0.313215
Claudin10	mRNA	Cldn10	Mus musculus	astrocyte		brain	brain					M. Vanlandewijck, L. He, M.A. Mae, J. Andrae, K. Ando, F. Del Gaudio, et al., A molecular atlas of cell types and zonation in the brain vasculature, Nature. 554 (2018) 475-80. 10.1038/nature25739.	1.13047	-0.213934	-0.202406	-0.107903	-0.214226	-0.089488	-0.205585	1.23349	-0.218682	-0.0972816	-0.224574	-0.106273	-0.128478	-0.0987322	-0.0889082	-0.190156	-0.111654	-0.132927	-0.129483	-0.133273	-0.0695354	-0.121996	-0.0139992	-0.090973	-0.119601	-0.096389	0.626091	-0.079633	-0.115669	-0.225491	-0.0866641	-0.0995592	-0.19403	-0.173328	-0.116486	-0.101159	-0.173099
DLL1	mRNA	Dll1	Mus musculus	ependymal		brain	lateral_ventricle					M. Carlen, K. Meletis, C. Goritz, V. Darsalia, E. Evergren, K. Tanigaki, et al., Forebrain ependymal cells are Notch-dependent and generate neuroblasts and astrocytes after stroke, Nat Neurosci. 12 (2009) 259-67. 10.1038/nn.2268.	-0.129803	-0.0173808	-0.12544	0.0229636	-0.0236088	0.197003	0.00529699	-0.129579	-0.0458266	0.0232371	-0.0958104	-0.0145349	0.0313056	0.0467006	-0.0218479	-0.123568	0.0403814	-0.0302967	-0.0662915	-0.00859657	-0.00265618	0.0110882	0.760793	-0.0291732	0.129131	0.152678	-0.125236	-0.0635964	0.158305	0.1156	0.388019	0.0452637	-0.128605	-0.0309473	-0.00238682	0.0552401	-0.116664
Actin_beta	mRNA	Actb	Mus musculus	ependymal		brain	lateral_ventricle					M. Carlen, K. Meletis, C. Goritz, V. Darsalia, E. Evergren, K. Tanigaki, et al., Forebrain ependymal cells are Notch-dependent and generate neuroblasts and astrocytes after stroke, Nat Neurosci. 12 (2009) 259-67. 10.1038/nn.2268.	-0.101669	1.33869	0.496687	-0.271816	0.34923	0.190068	0.317484	-0.117796	0.415712	-0.290427	0.355231	-0.270374	-0.268402	-0.259081	-0.258416	0.464372	-0.302283	-0.268717	-0.265363	-0.263744	-0.244169	-0.246487	0.230612	-0.278167	-0.26861	-0.287469	-0.0263338	-0.0984957	-0.299507	0.30344	-0.335645	-0.284001	0.030094	1.36653	-0.298283	-0.272768	-0.194367
Notch2	mRNA	Notch2	Mus musculus	ependymal		brain	lateral_ventricle					M. Carlen, K. Meletis, C. Goritz, V. Darsalia, E. Evergren, K. Tanigaki, et al., Forebrain ependymal cells are Notch-dependent and generate neuroblasts and astrocytes after stroke, Nat Neurosci. 12 (2009) 259-67. 10.1038/nn.2268.	0.799426	-0.107093	1.07897	-0.192132	-0.186896	0.620414	-0.205513	0.829932	-0.199306	-0.194725	-0.148751	-0.177487	-0.213937	-0.211194	-0.232274	1.02495	-0.245312	-0.195071	-0.178568	-0.269265	-0.230418	-0.247425	-0.207228	-0.115518	-0.248353	-0.198712	0.423603	-0.193714	0.0387513	-0.104585	-0.188594	-0.246534	1.44421	-0.0979115	-0.234468	0.192063	3.00222
Notch1	mRNA	Notch1	Mus musculus	ependymal		brain	brain					M. Carlen, K. Meletis, C. Goritz, V. Darsalia, E. Evergren, K. Tanigaki, et al., Forebrain ependymal cells are Notch-dependent and generate neuroblasts and astrocytes after stroke, Nat Neurosci. 12 (2009) 259-67. 10.1038/nn.2268.	1.04241	1.27357	0.0912354	-0.197634	-0.193866	0.465597	-0.194925	1.06561	-0.197422	-0.19782	-0.206121	-0.198048	-0.209745	-0.205223	-0.193417	0.0866414	-0.197225	-0.185691	-0.197583	-0.20565	-0.206768	-0.199391	0.808384	-0.198535	-0.194252	-0.212434	0.907796	-0.178463	-0.212774	-0.00764283	-0.178647	-0.20362	-0.0486834	1.09304	-0.183718	-0.19942	-0.00164319
Rbpj	mRNA	Rbpj	Mus musculus	ependymal		brain	lateral_ventricle					M. Carlen, K. Meletis, C. Goritz, V. Darsalia, E. Evergren, K. Tanigaki, et al., Forebrain ependymal cells are Notch-dependent and generate neuroblasts and astrocytes after stroke, Nat Neurosci. 12 (2009) 259-67. 10.1038/nn.2268.	-0.10001	0.0464573	0.443422	-0.0060866	-0.0202213	0.186096	-0.0769332	-0.110254	0.0152732	0.0423249	0.0483709	0.0361177	-0.0512371	-0.0128565	-0.021611	0.37469	-0.0356937	-0.0128722	-0.0745619	-0.0173159	0.0296653	-0.0208335	-0.0396348	-0.0173777	-0.0766711	-0.000813876	-0.063349	-0.167548	-0.0425938	0.282274	0.013063	-0.0676706	0.0297727	0.0158111	0.0133168	-0.0305841	-0.0214682
Musashi2	mRNA	Msi2	non_specific	ependymal		brain	brain					M. Carlen, K. Meletis, C. Goritz, V. Darsalia, E. Evergren, K. Tanigaki, et al., Forebrain ependymal cells are Notch-dependent and generate neuroblasts and astrocytes after stroke, Nat Neurosci. 12 (2009) 259-67. 10.1038/nn.2268.	1.30998	0.0632969	-0.592973	0.100905	-0.609885	0.147905	-0.673113	1.31485	-0.588024	0.0285291	-0.48684	-0.266664	0.351031	0.0715424	-0.0869199	-0.570152	0.64331	-0.0634332	-0.394616	0.60846	-0.240236	0.0144663	-0.266242	0.512358	1.16729	0.279466	1.23726	-0.471284	0.148879	-0.339634	0.625391	-0.0477887	-0.0949102	0.00628729	0.110559	0.0183606	1.297
Galectin-3	mRNA	Gal	non_specific	microglia	activated_microglia	brain	brain	glycinergic_neuron				J. Garcia-Revilla, A. Boza-Serrano, A.M. Espinosa-Oliva, M.S. Soto, T. Deierborg, R. Ruiz, et al., Galectin-3, a rising star in modulating microglia activation under conditions of neurodegeneration, Cell Death Dis. 13 (2022) 628. 10.1038/s41419-022-05058-3.	-0.0574277	-0.0629341	0.0237016	0.0323931	-0.0222841	-0.0503776	0.00233072	-0.050373	-0.0434683	-0.101901	-0.0592287	-0.0953076	-0.106472	-0.106503	0.358061	0.0331308	-0.10181	-0.0475043	-0.0429391	-0.0168182	-0.0588125	0.144203	-0.0787504	1.64897	-0.0865914	-0.0919653	-0.0914241	-0.0107376	-0.0146312	-0.0171585	-0.112687	-0.0846856	-0.0741746	-0.0598485	-0.0933413	-0.122256	-0.00670138
ATP1B2	mRNA_protein	Atp1b2	Mus musculus	astrocyte		brain	cortex_hippocampus					A. Sathyamurthy, K.R. Johnson, K.J.E. Matson, C.I. Dobrott, L. Li, A.R. Ryba, et al., Massively Parallel Single Nucleus Transcriptional Profiling Defines Spinal Cord Neurons and Their Activity during Behavior, Cell Rep. 22 (2018) 2216-25. 10.1016/j.celrep.2018.02.003.	1.88174	-0.0668561	-0.268596	-0.265744	-0.265942	0.0117458	-0.260382	2.01833	-0.266581	-0.318651	-0.277199	-0.294858	-0.206249	-0.264835	-0.228747	-0.248035	-0.281322	-0.194087	-0.213606	-0.284193	-0.25578	-0.268764	0.0295977	-0.292659	-0.180312	-0.249296	1.1885	-0.0370741	-0.190362	-0.286843	-0.356916	-0.253933	0.0111252	0.0413268	-0.342072	-0.320102	-0.25743
Dbx2	mRNA	Dbx2	Mus musculus	astrocyte		brain	cortex_hippocampus					A. Sathyamurthy, K.R. Johnson, K.J.E. Matson, C.I. Dobrott, L. Li, A.R. Ryba, et al., Massively Parallel Single Nucleus Transcriptional Profiling Defines Spinal Cord Neurons and Their Activity during Behavior, Cell Rep. 22 (2018) 2216-25. 10.1016/j.celrep.2018.02.003.	1.41326	-0.198694	-0.20732	-0.207796	-0.205508	0.131736	-0.204427	1.52895	-0.206456	-0.212255	-0.21134	-0.213075	-0.208777	-0.217474	-0.212911	-0.193232	-0.20701	-0.212636	-0.200556	-0.208005	-0.202828	-0.212079	0.647628	-0.219072	-0.215046	-0.200992	0.893034	-0.115506	-0.170491	-0.120302	-0.211975	-0.20668	-0.184304	-0.146867	-0.21434	-0.215896	-0.187048
Eno1	mRNA	Eno1	Mus musculus	astrocyte		brain	cortex_hippocampus					A. Sathyamurthy, K.R. Johnson, K.J.E. Matson, C.I. Dobrott, L. Li, A.R. Ryba, et al., Massively Parallel Single Nucleus Transcriptional Profiling Defines Spinal Cord Neurons and Their Activity during Behavior, Cell Rep. 22 (2018) 2216-25. 10.1016/j.celrep.2018.02.003.	0.525003	-0.0617771	-0.00462149	-0.00419388	-0.182454	-0.0015674	-0.19128	0.593119	-0.202392	0.0553451	-0.132978	-0.0108795	-0.121388	-0.0607073	-0.075294	-0.00214248	0.0968044	-0.0540225	-0.092737	0.106315	-0.065603	0.00760624	0.0704413	-0.0279129	0.0693122	0.0585764	0.115056	-0.0872118	-0.0455966	-0.134637	0.177973	-0.100971	-0.235875	-0.0081791	-0.0104846	-0.00938518	0.218502
Glud1	mRNA	Glud1	Mus musculus	astrocyte		brain	cortex_hippocampus					A. Sathyamurthy, K.R. Johnson, K.J.E. Matson, C.I. Dobrott, L. Li, A.R. Ryba, et al., Massively Parallel Single Nucleus Transcriptional Profiling Defines Spinal Cord Neurons and Their Activity during Behavior, Cell Rep. 22 (2018) 2216-25. 10.1016/j.celrep.2018.02.003.	1.08571	-0.250638	-0.0444508	-0.0102271	-0.340691	-0.172924	-0.364719	1.13338	-0.314327	0.0868435	-0.318302	0.0110994	-0.101315	-0.0611937	-0.115656	-0.0378959	0.0550545	-0.102732	-0.107772	0.0803695	-0.0347839	-0.031648	-0.220212	-0.0776718	-0.0548741	0.0867457	0.994971	-0.166154	-0.0759362	-0.344999	0.204557	-0.160282	-0.18858	-0.214969	0.0898	0.0506325	-0.272068
Frzb	mRNA	Frzb	Mus musculus	astrocyte		brain	cortex_hippocampus	tanycyte				A. Sathyamurthy, K.R. Johnson, K.J.E. Matson, C.I. Dobrott, L. Li, A.R. Ryba, et al., Massively Parallel Single Nucleus Transcriptional Profiling Defines Spinal Cord Neurons and Their Activity during Behavior, Cell Rep. 22 (2018) 2216-25. 10.1016/j.celrep.2018.02.003.	-0.0805756	-0.0855307	-0.0935592	0.0449145	-0.0810534	0.0920644	-0.0803554	-0.0880434	-0.0778081	0.0586336	-0.0862823	0.0155271	0.0490305	0.506911	-0.0385798	-0.0873987	-0.0107422	0.0218662	0.138697	-0.0276808	-0.0161532	0.00318874	0.240303	-0.00964493	-0.0723738	0.0636971	-0.0566271	-0.0602656	-0.0295309	-0.0643797	-0.0458851	-0.0164551	0.265386	-0.0767546	-0.0681107	0.00890898	-0.093559
Agt	mRNA	Agt	Mus musculus	astrocyte		brain	cortex_hippocampus					A. Sathyamurthy, K.R. Johnson, K.J.E. Matson, C.I. Dobrott, L. Li, A.R. Ryba, et al., Massively Parallel Single Nucleus Transcriptional Profiling Defines Spinal Cord Neurons and Their Activity during Behavior, Cell Rep. 22 (2018) 2216-25. 10.1016/j.celrep.2018.02.003.	1.57717	-0.138017	-0.196007	-0.23066	-0.190567	-0.111538	-0.177003	1.53094	-0.197856	-0.240676	-0.212203	-0.230832	-0.214798	-0.228248	-0.225956	-0.187315	-0.235025	-0.230217	-0.235125	-0.239629	-0.23842	-0.234329	-0.17759	-0.227621	-0.22893	-0.226999	2.23993	-0.0473282	-0.222714	-0.211184	-0.243705	-0.231463	-0.167244	-0.08921	-0.231739	-0.237056	-0.169249
Unc13c	mRNA	Unc13c	Mus musculus	astrocyte		brain	cortex_hippocampus					A. Sathyamurthy, K.R. Johnson, K.J.E. Matson, C.I. Dobrott, L. Li, A.R. Ryba, et al., Massively Parallel Single Nucleus Transcriptional Profiling Defines Spinal Cord Neurons and Their Activity during Behavior, Cell Rep. 22 (2018) 2216-25. 10.1016/j.celrep.2018.02.003.	0.164449	-0.266573	-0.653645	0.41776	-0.660233	0.160656	-0.657366	0.130074	-0.662321	0.407202	-0.666128	0.897463	-0.420277	0.651911	0.666508	-0.622006	0.00482342	-0.170832	0.229971	0.593168	0.941468	0.491984	0.889719	0.327869	-0.310336	0.67244	0.522424	-0.0952377	0.0310008	-0.604587	1.52605	1.13222	-0.227849	-0.280135	1.16435	-0.301341	-0.623513
Ogt	mRNA	Ogt	Mus musculus	astrocyte		brain	cortex_hippocampus					A. Sathyamurthy, K.R. Johnson, K.J.E. Matson, C.I. Dobrott, L. Li, A.R. Ryba, et al., Massively Parallel Single Nucleus Transcriptional Profiling Defines Spinal Cord Neurons and Their Activity during Behavior, Cell Rep. 22 (2018) 2216-25. 10.1016/j.celrep.2018.02.003.	0.203316	-0.330679	-0.307536	0.131248	-0.25282	0.0651258	-0.322743	0.211917	-0.175271	0.186542	-0.195651	0.0489554	0.0605555	0.117163	-0.0409042	-0.299973	0.349371	-0.0431437	-0.022494	0.33479	0.00209459	0.151463	-0.124452	0.0806608	0.486909	0.249524	0.0748737	-0.358563	0.104533	-0.18936	0.392299	0.0113498	0.453272	-0.318957	0.318024	0.439924	0.287459
Fam107a	mRNA	Fam107a	Mus musculus	astrocyte		brain	cortex_hippocampus					A. Sathyamurthy, K.R. Johnson, K.J.E. Matson, C.I. Dobrott, L. Li, A.R. Ryba, et al., Massively Parallel Single Nucleus Transcriptional Profiling Defines Spinal Cord Neurons and Their Activity during Behavior, Cell Rep. 22 (2018) 2216-25. 10.1016/j.celrep.2018.02.003.	0.97108	0.236289	-0.151024	-0.156888	-0.120786	0.0559023	-0.120854	0.990667	-0.112099	-0.161067	-0.130368	-0.161869	-0.16076	-0.166502	-0.163684	-0.143432	-0.153836	-0.150108	-0.165599	-0.160719	-0.159054	-0.165043	-0.136789	-0.140943	-0.166929	-0.16157	0.809782	-0.0423923	-0.156742	-0.145562	-0.134088	-0.144387	-0.00265754	0.283157	-0.171305	-0.153345	0.815705
Sdha	mRNA	Sdha	Mus musculus	astrocyte		brain	cortex_hippocampus					A. Sathyamurthy, K.R. Johnson, K.J.E. Matson, C.I. Dobrott, L. Li, A.R. Ryba, et al., Massively Parallel Single Nucleus Transcriptional Profiling Defines Spinal Cord Neurons and Their Activity during Behavior, Cell Rep. 22 (2018) 2216-25. 10.1016/j.celrep.2018.02.003.	-0.0422797	-0.0791379	-0.175022	0.137783	-0.159548	-0.0988892	-0.202928	-0.041676	-0.125552	0.198499	-0.0915869	0.140726	0.11006	0.0841078	0.0767653	-0.162382	0.278747	0.1105	0.0284354	0.282352	0.0990394	0.0893455	-0.176211	0.0456469	0.280156	0.119301	-0.0869656	-0.0335317	0.14891	-0.184206	0.225661	0.0337848	-0.0775319	-0.0353376	0.150593	0.187852	0.0282919
GLAST	mRNA	Slc1a3	Mus musculus	astrocyte		brain	cortex_hippocampus	alpha_tanycyte			CNS	A. Sathyamurthy, K.R. Johnson, K.J.E. Matson, C.I. Dobrott, L. Li, A.R. Ryba, et al., Massively Parallel Single Nucleus Transcriptional Profiling Defines Spinal Cord Neurons and Their Activity during Behavior, Cell Rep. 22 (2018) 2216-25. 10.1016/j.celrep.2018.02.003.	1.45033	-0.378283	0.790476	-0.438582	0.036428	0.250346	-0.133886	1.38224	0.136156	-0.450531	0.381591	-0.444802	-0.434923	-0.434119	-0.439193	0.784871	-0.442852	-0.445293	-0.437251	-0.443865	-0.446349	-0.453476	0.122442	-0.441624	-0.44351	-0.440497	1.73007	-0.34641	-0.420857	-0.352489	-0.412816	-0.432341	1.33068	-0.301143	-0.447586	-0.43558	-0.383193
Sdhb	mRNA	Sdhb	Mus musculus	astrocyte		brain	cortex_hippocampus					A. Sathyamurthy, K.R. Johnson, K.J.E. Matson, C.I. Dobrott, L. Li, A.R. Ryba, et al., Massively Parallel Single Nucleus Transcriptional Profiling Defines Spinal Cord Neurons and Their Activity during Behavior, Cell Rep. 22 (2018) 2216-25. 10.1016/j.celrep.2018.02.003.	0.0477677	-0.185495	-0.0233759	0.0827881	-0.124841	-0.0649083	-0.133079	0.0652788	-0.126815	0.159524	-0.115654	0.0963266	0.0686289	0.0645886	0.00755657	-0.0172843	0.188223	-0.00406761	-0.00902592	0.148977	0.069411	0.055065	-0.049557	-0.00311774	0.107431	0.10598	-0.113238	-0.0638082	0.0377713	0.00625353	0.147542	-0.0362923	-0.149854	-0.165554	0.0567314	0.110458	0.0262742
Slc38a2	mRNA	Slc38a2	Homo sapiens	mural	meningeal_fibroblast	brain	cortex					A.C. Yang, R.T. Vest, F. Kern, D.P. Lee, M. Agam, C.A. Maat, et al., A human brain vascular atlas reveals diverse mediators of Alzheimer's risk, Nature. 603 (2022) 885-92. 10.1038/s41586-021-04369-3.	-0.720082	-0.330242	-0.268642	-0.175285	0.595374	-0.263028	0.782247	-0.765393	0.720472	-0.0711809	-0.0193748	-0.128819	-0.324283	-0.113751	-0.331985	-0.265359	-0.146658	-0.310243	-0.249103	-0.1116	-0.177938	-0.224066	-0.320739	-0.339481	-0.217841	-0.16751	-0.485482	-0.376573	-0.288549	-0.02559	-0.00803678	-0.0844384	0.329249	-0.340002	-0.0864033	-0.0492006	-0.534421
Slc22a23	mRNA	Slc22a23	Homo sapiens	mural	meningeal_fibroblast	brain	cortex					A.C. Yang, R.T. Vest, F. Kern, D.P. Lee, M. Agam, C.A. Maat, et al., A human brain vascular atlas reveals diverse mediators of Alzheimer's risk, Nature. 603 (2022) 885-92. 10.1038/s41586-021-04369-3.	-0.368403	-0.687903	-0.724056	0.0828384	0.0603642	0.0887706	-0.0534573	-0.433738	0.185575	0.258986	0.123255	0.157388	-0.0862456	-0.0687184	-0.126922	-0.705489	0.226876	0.0785029	-0.0860204	0.160071	0.058598	0.0823956	0.408386	-0.327924	0.517814	0.207017	-0.081645	-0.309478	0.231013	1.12337	0.436981	-0.169632	0.072391	-0.637927	-0.0798892	-0.0521887	-0.614637
Abca8a	mRNA	Abca8a	Homo sapiens	mural	perivascular_fibroblast	brain	cortex					A.C. Yang, R.T. Vest, F. Kern, D.P. Lee, M. Agam, C.A. Maat, et al., A human brain vascular atlas reveals diverse mediators of Alzheimer's risk, Nature. 603 (2022) 885-92. 10.1038/s41586-021-04369-3.	-0.263509	-0.23338	-0.253248	-0.261365	0.49412	0.0919866	0.52501	-0.272039	0.616393	-0.267696	0.288215	-0.265084	-0.240827	-0.275135	-0.264455	-0.256165	-0.263362	-0.26827	-0.255116	-0.268922	-0.26253	-0.259991	-0.2723	-0.268347	-0.258568	-0.263672	-0.250207	-0.250211	-0.265443	0.00574786	-0.267385	-0.258622	1.80929	-0.182793	-0.253726	-0.258545	-0.2133
Slc7a2	mRNA	Slc7a2	Homo sapiens	mural	meningeal_fibroblast	brain	cortex					A.C. Yang, R.T. Vest, F. Kern, D.P. Lee, M. Agam, C.A. Maat, et al., A human brain vascular atlas reveals diverse mediators of Alzheimer's risk, Nature. 603 (2022) 885-92. 10.1038/s41586-021-04369-3.	1.32725	-0.126726	-0.209737	-0.185623	-0.214461	0.165044	-0.212478	1.43152	-0.216134	-0.152394	-0.221288	-0.187185	-0.208346	-0.164912	-0.213818	-0.197762	-0.205124	-0.213678	-0.207251	-0.198464	-0.2075	-0.206674	-0.199287	-0.220895	-0.209245	-0.20806	0.851442	-0.0865289	-0.213825	-0.222814	-0.187201	-0.170799	1.65904	-0.0284285	-0.191898	-0.0460665	-0.194136
Fbln1	mRNA	Fbln1	Homo sapiens	mural	perivascular_fibroblast	brain	cortex					A.C. Yang, R.T. Vest, F. Kern, D.P. Lee, M. Agam, C.A. Maat, et al., A human brain vascular atlas reveals diverse mediators of Alzheimer's risk, Nature. 603 (2022) 885-92. 10.1038/s41586-021-04369-3.	0.308101	0.017759	-0.0798087	-0.0473534	-0.0929653	0.218768	-0.0899323	0.267472	-0.0979673	-0.0827741	-0.0999528	-0.08521	0.18209	-0.0214437	-0.0817275	-0.0840153	-0.0322348	-0.0145156	-0.0312142	-0.0948065	-0.0888679	-0.0905958	-0.0919806	-0.0866939	-0.0367992	-0.0673977	0.587503	0.00118391	0.107763	-0.0918621	-0.11318	-0.0926336	1.32275	0.0403177	-0.117296	-0.0593499	0.204695
Slc47a1	mRNA	Slc47a1	Homo sapiens	mural	meningeal_fibroblast	brain	cortex					A.C. Yang, R.T. Vest, F. Kern, D.P. Lee, M. Agam, C.A. Maat, et al., A human brain vascular atlas reveals diverse mediators of Alzheimer's risk, Nature. 603 (2022) 885-92. 10.1038/s41586-021-04369-3.	-0.0310485	-0.0287631	-0.0344102	-0.0273899	-0.0311609	0.13232	-0.0301084	-0.0339377	-0.0359921	-0.0206381	-0.0267242	-0.0356733	-0.0270271	-0.0329438	-0.0341993	-0.0347423	-0.0334352	-0.0387241	-0.0254022	-0.0430013	-0.0315273	-0.0152225	-0.0317989	-0.0318875	-0.0391018	-0.0322237	-0.0203479	0.00486808	-0.0144993	-0.0207402	-0.0109995	-0.0288359	1.06965	-0.0194857	-0.0120899	-0.0311926	-0.0430013
Slc26a2	mRNA	Slc26a2	Homo sapiens	mural	meningeal_fibroblast	brain	cortex					A.C. Yang, R.T. Vest, F. Kern, D.P. Lee, M. Agam, C.A. Maat, et al., A human brain vascular atlas reveals diverse mediators of Alzheimer's risk, Nature. 603 (2022) 885-92. 10.1038/s41586-021-04369-3.	-0.0561003	0.0696371	0.202457	0.0232427	-0.0555925	0.10143	-0.0722963	-0.0622046	-0.0600275	0.0586542	-0.00752272	0.00695371	-0.0132166	0.000398293	-0.029194	0.20005	0.0262367	-0.0268909	-0.0182398	0.0580497	0.00791148	0.0142293	0.103635	-0.04441	-0.000684396	0.109473	-0.046527	-0.102248	-0.0122198	0.0878937	0.285188	0.0869412	0.300296	0.0347651	0.145299	0.0826036	0.0977975
Slc13a3	mRNA	Slc13a3	Homo sapiens	mural	meningeal_fibroblast	brain	cortex					A.C. Yang, R.T. Vest, F. Kern, D.P. Lee, M. Agam, C.A. Maat, et al., A human brain vascular atlas reveals diverse mediators of Alzheimer's risk, Nature. 603 (2022) 885-92. 10.1038/s41586-021-04369-3.	0.573948	-0.115955	0.0244192	-0.139959	-0.0253693	0.135671	-0.135496	0.661987	-0.114649	-0.1427	0.395116	-0.143609	-0.138904	-0.130975	-0.148204	0.0256959	-0.145321	-0.141593	-0.140753	-0.140026	-0.142522	-0.141308	-0.123707	-0.144115	-0.143286	-0.142869	0.0470427	-0.0676797	-0.139447	-0.131896	-0.135669	-0.135845	1.57724	-0.110902	-0.140416	-0.143454	-0.125891
Slc26a7	mRNA	Slc26a7	Homo sapiens	mural	meningeal_fibroblast	brain	cortex					A.C. Yang, R.T. Vest, F. Kern, D.P. Lee, M. Agam, C.A. Maat, et al., A human brain vascular atlas reveals diverse mediators of Alzheimer's risk, Nature. 603 (2022) 885-92. 10.1038/s41586-021-04369-3.	-0.0282966	-0.0419267	-0.0585249	-0.000748391	-0.0446542	0.0144519	-0.0474567	-0.0311241	-0.0409749	-0.00776747	-0.0438578	-0.0118412	-0.00360307	0.00933785	-0.0130857	-0.0585249	-0.0239576	0.146687	-0.0538004	0.0731527	0.016712	-0.0226616	-0.0585249	-0.0417805	-0.0329001	-0.0445386	-0.0131481	-0.0393476	0.108133	-0.0485065	-0.0481927	-0.0351345	0.354839	-0.0458568	-0.0505219	0.0802052	0.0542769
Slc7a11	mRNA	Slc7a11	Homo sapiens	mural	perivascular_fibroblast	brain	cortex					A.C. Yang, R.T. Vest, F. Kern, D.P. Lee, M. Agam, C.A. Maat, et al., A human brain vascular atlas reveals diverse mediators of Alzheimer's risk, Nature. 603 (2022) 885-92. 10.1038/s41586-021-04369-3.	1.29445	-0.181287	-0.191402	-0.213185	-0.211007	0.450158	-0.215325	0.99945	-0.214287	-0.211868	-0.201917	-0.214763	-0.219282	-0.216783	-0.222609	-0.186993	-0.219755	-0.209985	-0.219987	-0.211741	-0.212697	-0.221465	-0.220326	-0.21393	-0.221827	-0.207195	2.80175	-0.176099	-0.201595	-0.228877	-0.212736	-0.217505	3.45133	-0.100493	-0.216267	-0.237788	-0.197055
Lama2	mRNA	Lama2	Homo sapiens	mural	perivascular_fibroblast	brain	cortex					A.C. Yang, R.T. Vest, F. Kern, D.P. Lee, M. Agam, C.A. Maat, et al., A human brain vascular atlas reveals diverse mediators of Alzheimer's risk, Nature. 603 (2022) 885-92. 10.1038/s41586-021-04369-3.	1.30681	-0.21561	-0.44748	-0.413548	0.132494	0.285824	-0.0232488	1.27395	0.477311	-0.432652	0.105382	-0.43522	-0.440844	-0.40817	-0.437973	-0.430953	-0.400465	-0.362457	-0.444494	-0.440975	-0.418646	-0.430292	-0.434971	-0.435714	-0.395371	-0.415231	1.24016	-0.395215	-0.277444	-0.332262	-0.436284	-0.428166	2.44195	-0.154998	-0.432114	-0.367651	-0.41518
Abca8b	mRNA	Abca8b	Homo sapiens	mural	perivascular_fibroblast	brain	cortex					A.C. Yang, R.T. Vest, F. Kern, D.P. Lee, M. Agam, C.A. Maat, et al., A human brain vascular atlas reveals diverse mediators of Alzheimer's risk, Nature. 603 (2022) 885-92. 10.1038/s41586-021-04369-3.	-0.380547	-0.503375	-0.49849	-0.0336146	0.262323	-0.160368	0.35812	-0.384589	0.279848	-0.0709418	-0.0731591	0.0868684	0.0258324	-0.263402	0.06691	-0.487275	-0.0381678	-0.0763966	0.0363192	-0.0303809	0.0570414	0.0831601	0.120816	0.0561146	-0.161812	-0.0279845	-0.380929	-0.240944	-0.041673	0.412247	-0.371158	-0.138293	-0.0562304	-0.462401	-0.248508	-0.21311	-0.477789
Slc9b2	mRNA	Slc9b2	Homo sapiens	mural	meningeal_fibroblast	brain	cortex					A.C. Yang, R.T. Vest, F. Kern, D.P. Lee, M. Agam, C.A. Maat, et al., A human brain vascular atlas reveals diverse mediators of Alzheimer's risk, Nature. 603 (2022) 885-92. 10.1038/s41586-021-04369-3.	-0.137484	-0.0600366	-0.12732	0.067881	-0.0372941	-0.0837989	-0.138748	-0.137176	-0.132777	-0.0177527	0.37388	0.0178705	0.145891	-0.0618049	0.270244	-0.127555	-0.100263	0.475636	0.230819	-0.0396788	0.0832128	-0.0131575	-0.14012	0.212639	-0.0617871	0.0305069	-0.146882	-0.0537154	0.292573	-0.126775	-0.11634	-0.0786333	0.170128	-0.062454	-0.124415	-0.0655507	-0.141431
Slc41a2	mRNA	Slc41a2	Homo sapiens	mural	meningeal_fibroblast	brain	cortex					A.C. Yang, R.T. Vest, F. Kern, D.P. Lee, M. Agam, C.A. Maat, et al., A human brain vascular atlas reveals diverse mediators of Alzheimer's risk, Nature. 603 (2022) 885-92. 10.1038/s41586-021-04369-3.	-0.419789	-0.441009	-0.415174	0.401291	-0.389266	-0.11892	-0.40262	-0.427895	-0.402345	0.372708	-0.339128	0.428995	0.422912	0.234848	0.461721	-0.404579	0.358846	0.430106	0.382738	0.45587	0.408059	0.33982	0.0678611	0.561562	0.602805	0.42614	-0.388932	-0.138286	0.665035	-0.337541	0.421768	0.188732	-0.168412	-0.405951	0.305128	0.217144	-0.266556
Abca9	mRNA	Abca9	Homo sapiens	mural	perivascular_fibroblast	brain	cortex					A.C. Yang, R.T. Vest, F. Kern, D.P. Lee, M. Agam, C.A. Maat, et al., A human brain vascular atlas reveals diverse mediators of Alzheimer's risk, Nature. 603 (2022) 885-92. 10.1038/s41586-021-04369-3.	-0.167739	-0.0952733	3.70536	-0.0791307	-0.17066	0.462923	-0.176131	-0.174661	-0.178693	-0.0926203	-0.173439	-0.0886448	-0.0298807	-0.109474	-0.104392	3.57467	-0.0789759	-0.0807534	-0.066721	-0.0959006	-0.0643181	-0.0734197	-0.113189	-0.110642	-0.0160117	-0.0465117	-0.166829	-0.150067	-0.121518	-0.171037	-0.0719315	-0.0851228	2.30896	-0.0588149	0.0290809	0.0130355	-0.138976
Slc39a11	mRNA	Slc39a11	Homo sapiens	mural	meningeal_fibroblast	brain	cortex					A.C. Yang, R.T. Vest, F. Kern, D.P. Lee, M. Agam, C.A. Maat, et al., A human brain vascular atlas reveals diverse mediators of Alzheimer's risk, Nature. 603 (2022) 885-92. 10.1038/s41586-021-04369-3.	-0.078991	-0.113923	0.136214	0.171538	-0.226784	-0.0535525	-0.276197	-0.0866018	-0.231881	0.211999	-0.0879715	0.316421	0.105488	0.0428474	0.14632	0.146139	0.115854	0.229417	0.110143	0.195577	0.365172	0.218602	-0.164204	0.175458	-0.0136495	0.221695	-0.0835968	-0.107815	0.22056	-0.0553974	0.144822	-0.0785825	-0.168941	-0.152805	-0.0234926	0.00668344	0.108884
Slc2a3	mRNA	Slc2a3	Homo sapiens	mural	meningeal_fibroblast	brain	cortex					A.C. Yang, R.T. Vest, F. Kern, D.P. Lee, M. Agam, C.A. Maat, et al., A human brain vascular atlas reveals diverse mediators of Alzheimer's risk, Nature. 603 (2022) 885-92. 10.1038/s41586-021-04369-3.	-0.367825	-0.457954	-0.276892	0.454672	-0.485846	-0.188376	-0.476568	-0.37566	-0.500125	0.571894	-0.493455	0.507312	0.401594	0.459913	0.412072	-0.264635	0.586325	0.371604	0.402035	0.483397	0.457564	0.375657	0.11928	0.217527	0.515875	0.504747	-0.337289	0.0350331	0.445899	-0.43284	0.383923	0.314351	-0.483834	-0.449405	0.426242	0.557917	-0.480101
Slc24a3	mRNA	Slc24a3	Homo sapiens	mural	meningeal_fibroblast	brain	cortex					A.C. Yang, R.T. Vest, F. Kern, D.P. Lee, M. Agam, C.A. Maat, et al., A human brain vascular atlas reveals diverse mediators of Alzheimer's risk, Nature. 603 (2022) 885-92. 10.1038/s41586-021-04369-3.	0.0773627	-0.731905	0.544693	0.280831	-0.472587	-0.0121143	-0.431093	0.107793	-0.45922	-0.0227685	-0.619606	0.193844	0.444244	0.30515	0.354016	0.560578	-0.00493362	0.408281	0.519134	0.0610513	0.650875	0.967265	0.047672	0.235105	0.277528	-0.0524544	-0.046205	-0.343866	0.331617	-0.271066	-0.462193	1.13324	0.965993	-0.662082	2.0765	0.388242	-0.649917
Slc35g1	mRNA	Slc35g1	Homo sapiens	mural	meningeal_fibroblast	brain	cortex					A.C. Yang, R.T. Vest, F. Kern, D.P. Lee, M. Agam, C.A. Maat, et al., A human brain vascular atlas reveals diverse mediators of Alzheimer's risk, Nature. 603 (2022) 885-92. 10.1038/s41586-021-04369-3.	-0.0752172	-0.114976	-0.0633305	0.056845	-0.0944773	0.123626	-0.0905691	-0.0763051	-0.0978627	0.0823089	-0.0974236	0.0376142	-0.00356618	0.0977978	-0.0309954	-0.0654322	0.101528	0.0589855	0.0197971	0.0804081	0.0480306	0.0748203	0.309064	0.0585502	0.0259411	0.245315	-0.0747614	-0.0230413	0.00765447	-0.00601402	0.173806	-0.0183528	0.133448	-0.101375	0.0454899	0.0728534	0.147373
Abca6	mRNA	Abca6	Homo sapiens	mural	perivascular_fibroblast	brain	cortex					A.C. Yang, R.T. Vest, F. Kern, D.P. Lee, M. Agam, C.A. Maat, et al., A human brain vascular atlas reveals diverse mediators of Alzheimer's risk, Nature. 603 (2022) 885-92. 10.1038/s41586-021-04369-3.	-0.257004	-0.221017	-0.252329	-0.079437	0.224441	0.0604981	0.186073	-0.262369	0.308633	-0.074538	0.235304	-0.0893516	0.0555648	-0.117821	-0.169343	-0.249574	-0.0693075	-0.107469	-0.0799438	-0.126104	-0.0688465	-0.0586992	0.312075	-0.164715	0.0100677	-0.0336696	-0.236824	-0.184934	-0.128798	-0.0531065	-0.0722407	-0.0737955	0.234968	-0.205968	0.00983693	0.0298998	-0.130807
Tnf	mRNA	Tnf	Rattus rattus	microglia		brain	cortex					S. Chasseigneaux, Y. Moraca, V. Cochois-Guegan, A.C. Boulay, A. Gilbert, S. Le Crom, et al., Isolation and differential transcriptome of vascular smooth muscle cells and mid-capillary pericytes from the rat brain, Sci Rep. 8 (2018) 12272. 10.1038/s41598-018-30739-5.	-0.027368	-0.0282342	0.276302	-0.0261735	-0.0269769	-0.0246067	-0.0270081	-0.0282342	-0.0282342	-0.0262353	-0.0282342	-0.0238379	-0.0282342	-0.0212288	-0.0282342	0.256284	-0.0240714	-0.0282342	-0.0282342	-0.0282342	-0.0229673	-0.0282342	-0.0282342	-0.0282342	-0.0282342	-0.0282342	-0.0282342	-0.0282342	-0.0282342	-0.0282342	-0.0209622	-0.0282342	-0.0282342	-0.0282342	-0.0282342	-0.0282342	-0.0282342
Crispld2	mRNA	Crispld2	Rattus rattus	mural	pericyte	brain	brain					S. Chasseigneaux, Y. Moraca, V. Cochois-Guegan, A.C. Boulay, A. Gilbert, S. Le Crom, et al., Isolation and differential transcriptome of vascular smooth muscle cells and mid-capillary pericytes from the rat brain, Sci Rep. 8 (2018) 12272. 10.1038/s41598-018-30739-5.	0.0491594	-0.0175178	-0.0580664	-0.0467883	-0.0586562	0.298826	-0.0611399	0.0419412	-0.0567634	-0.0538641	-0.0591085	-0.0489012	-0.05461	-0.0589283	-0.040371	-0.0582327	-0.048078	-0.0443706	-0.0623702	-0.00778973	-0.0597836	-0.0463834	-0.0511608	-0.0602933	-0.0582563	0.000499183	0.129525	-0.0335932	-0.0216154	-0.0623702	-0.0546967	-0.0416953	2.09539	0.129508	-0.00853336	-0.0559441	-0.0331198
Ptn	mRNA	Ptn	Rattus rattus	mural	pericyte	brain	brain	tanycyte				S. Chasseigneaux, Y. Moraca, V. Cochois-Guegan, A.C. Boulay, A. Gilbert, S. Le Crom, et al., Isolation and differential transcriptome of vascular smooth muscle cells and mid-capillary pericytes from the rat brain, Sci Rep. 8 (2018) 12272. 10.1038/s41598-018-30739-5.	0.0719639	1.37765	-0.56364	-0.373636	0.480902	0.390731	0.577019	0.0173051	0.564977	-0.3712	0.0180612	-0.367832	-0.358449	-0.218748	-0.371493	-0.553471	-0.390525	-0.501907	-0.170346	-0.501927	-0.385855	-0.461709	0.668972	-0.576121	-0.163372	-0.422233	0.332636	-0.438527	-0.497655	0.76042	0.00978134	-0.563509	1.64267	1.11092	-0.581346	-0.244153	-0.614294
Tek	mRNA	Tek	Rattus rattus	endothelial		brain	brain					S. Chasseigneaux, Y. Moraca, V. Cochois-Guegan, A.C. Boulay, A. Gilbert, S. Le Crom, et al., Isolation and differential transcriptome of vascular smooth muscle cells and mid-capillary pericytes from the rat brain, Sci Rep. 8 (2018) 12272. 10.1038/s41598-018-30739-5.	-0.243201	3.42884	-0.300886	0.242566	-0.293662	-0.142215	-0.295196	-0.240632	-0.294995	0.483204	-0.288459	0.436344	0.142435	0.382127	0.085199	-0.285806	0.0564182	0.179737	0.0544279	0.0531107	0.253397	0.208294	-0.284956	-0.0515444	-0.0174086	0.275105	-0.265169	0.0802289	0.155746	-0.286023	0.314879	0.035491	-0.250243	3.02838	0.225289	0.274478	-0.0573
Claudin5	mRNA	Cldn5	Rattus rattus	endothelial		brain	brain					S. Chasseigneaux, Y. Moraca, V. Cochois-Guegan, A.C. Boulay, A. Gilbert, S. Le Crom, et al., Isolation and differential transcriptome of vascular smooth muscle cells and mid-capillary pericytes from the rat brain, Sci Rep. 8 (2018) 12272. 10.1038/s41598-018-30739-5.	-0.0509939	8.42089	-0.0963018	-0.0756969	-0.0728699	0.0994278	-0.0714273	-0.0627278	-0.0808556	-0.0796897	-0.0696051	-0.0799639	-0.069112	-0.0783176	-0.0816002	-0.0933749	-0.0796098	-0.0701579	-0.0772707	-0.0798409	-0.0784782	-0.0697495	-0.0754258	-0.0790794	-0.0609806	-0.0773524	-0.0240885	-0.0490519	-0.0772718	-0.0576444	-0.0907055	-0.0662962	-0.0340083	7.47326	-0.0792722	-0.0882842	-0.0374683
Crhr2	mRNA	Crhr2	Rattus rattus	mural	smooth_muscle	brain	brain					S. Chasseigneaux, Y. Moraca, V. Cochois-Guegan, A.C. Boulay, A. Gilbert, S. Le Crom, et al., Isolation and differential transcriptome of vascular smooth muscle cells and mid-capillary pericytes from the rat brain, Sci Rep. 8 (2018) 12272. 10.1038/s41598-018-30739-5.	-0.0588747	-0.0630606	-0.0458441	-0.0139517	-0.0611682	0.271167	-0.0605999	-0.0599914	-0.0607195	-0.0496388	-0.0630606	-0.0351006	-0.0263924	-0.0505936	-0.0277096	-0.0465095	-0.0148711	-0.00494618	0.098297	-0.0316499	-0.0331673	-0.0408151	-0.0630606	0.41974	-0.049425	-0.0575904	-0.0630606	-0.0438746	0.0445223	-0.0630606	-0.0630606	-0.0537359	-0.0505288	-0.025039	-0.0630606	-0.0630606	2.65725
Slc6a20b	mRNA	Slc6a20b	Rattus rattus	mural	pericyte	brain	brain					S. Chasseigneaux, Y. Moraca, V. Cochois-Guegan, A.C. Boulay, A. Gilbert, S. Le Crom, et al., Isolation and differential transcriptome of vascular smooth muscle cells and mid-capillary pericytes from the rat brain, Sci Rep. 8 (2018) 12272. 10.1038/s41598-018-30739-5.	-0.118665	-0.212881	-0.191275	0.166549	-0.17409	-0.083765	-0.192555	-0.116002	-0.166795	0.236217	-0.145461	0.206567	0.11782	0.136365	0.122686	-0.180757	0.232493	0.130382	0.0644953	0.20333	0.143213	0.172442	-0.140479	0.109444	0.130409	0.201941	-0.140295	-0.0272311	0.114984	-0.114076	0.259881	-0.0117262	0.115712	-0.20351	0.128761	0.298472	-0.00569787
Rgs5	mRNA	Rgs5	Rattus rattus	mural		brain	brain					S. Chasseigneaux, Y. Moraca, V. Cochois-Guegan, A.C. Boulay, A. Gilbert, S. Le Crom, et al., Isolation and differential transcriptome of vascular smooth muscle cells and mid-capillary pericytes from the rat brain, Sci Rep. 8 (2018) 12272. 10.1038/s41598-018-30739-5.	-0.0591648	4.672	-0.0731952	-0.067202	-0.078381	0.522856	-0.0790306	-0.0656686	-0.0780177	-0.0853985	-0.0852743	-0.0927614	-0.0736635	0.029207	-0.079495	-0.0712127	-0.0842346	0.0261925	-0.0869208	-0.0777722	-0.0739866	-0.0692684	-0.0650336	-0.0684268	-0.0886646	-0.0760799	-0.0456927	-0.0109867	-0.100268	-0.103005	-0.0958214	-0.0790569	-0.0725073	4.46753	-0.0326801	-0.0864184	0.0139223
Myh11	mRNA	Myh11	Rattus rattus	mural	smooth_muscle	brain	brain					S. Chasseigneaux, Y. Moraca, V. Cochois-Guegan, A.C. Boulay, A. Gilbert, S. Le Crom, et al., Isolation and differential transcriptome of vascular smooth muscle cells and mid-capillary pericytes from the rat brain, Sci Rep. 8 (2018) 12272. 10.1038/s41598-018-30739-5.	-0.0392668	0.262759	-0.0602057	-0.0237367	-0.0458209	0.19102	-0.0472906	-0.0396496	-0.0465088	-0.012973	-0.0440388	-0.0223048	-0.0302533	-0.0283218	-0.0393915	-0.0557167	-0.0206968	-0.0374357	-0.0196555	-0.0257667	-0.0306135	-0.0314644	-0.0283754	-0.00593551	-0.0248381	-0.0329777	-0.0375135	-0.0218446	-0.0354743	-0.0321949	-0.0413435	-0.0292958	-0.0476774	0.951926	-0.0299101	0.00166889	-0.0246597
Slc6a20a	mRNA	Slc6a20a	Rattus rattus	mural	pericyte	brain	brain					S. Chasseigneaux, Y. Moraca, V. Cochois-Guegan, A.C. Boulay, A. Gilbert, S. Le Crom, et al., Isolation and differential transcriptome of vascular smooth muscle cells and mid-capillary pericytes from the rat brain, Sci Rep. 8 (2018) 12272. 10.1038/s41598-018-30739-5.	-0.0888535	0.465252	-0.118846	-0.0721937	-0.117537	1.41219	-0.123716	-0.0989465	-0.122518	-0.0604663	-0.12342	-0.0761293	-0.0949898	-0.100498	-0.0904412	-0.127862	-0.0513441	-0.0837702	-0.0817697	-0.0584217	-0.0529313	-0.060239	-0.124248	-0.0959322	-0.0934177	-0.0636106	-0.117611	-0.03491	-0.0898908	-0.103709	-0.038473	-0.0918393	4.36156	0.467648	-0.0813249	-0.0823824	3.61562
Casq2	mRNA	Casq2	Rattus rattus	mural	smooth_muscle	brain	brain					S. Chasseigneaux, Y. Moraca, V. Cochois-Guegan, A.C. Boulay, A. Gilbert, S. Le Crom, et al., Isolation and differential transcriptome of vascular smooth muscle cells and mid-capillary pericytes from the rat brain, Sci Rep. 8 (2018) 12272. 10.1038/s41598-018-30739-5.	0.0197963	0.364003	-0.0476842	-0.0394572	-0.0401433	0.139013	-0.0372225	-0.00575833	-0.0477208	-0.0499603	-0.0427998	-0.0529957	-0.0519476	-0.0511382	-0.0492768	-0.0481832	-0.0162794	-0.0474379	-0.0374739	-0.0416927	-0.0394888	-0.0523883	-0.0457839	-0.0524153	-0.0454468	-0.0496565	0.180844	-0.0158878	-0.0425454	2.07336e-05	-0.043683	-0.0370557	-0.0605935	0.269761	0.180835	-0.0204846	-0.0605935
PDLIM3	mRNA	Pdlim3	Rattus rattus	mural	smooth_muscle	brain	brain					S. Chasseigneaux, Y. Moraca, V. Cochois-Guegan, A.C. Boulay, A. Gilbert, S. Le Crom, et al., Isolation and differential transcriptome of vascular smooth muscle cells and mid-capillary pericytes from the rat brain, Sci Rep. 8 (2018) 12272. 10.1038/s41598-018-30739-5.	-0.0706788	-0.0776228	-0.107741	0.0536433	-0.0894593	0.0556133	-0.100994	-0.0833998	-0.0832421	0.131774	-0.067953	0.122409	0.157774	0.00957797	-0.0274062	-0.105561	0.05375	-0.00415881	-0.0145232	0.0597526	0.0290638	-0.0262887	0.0981291	0.0325019	-0.0625415	0.0453	0.0196802	-0.0691982	0.0323159	-0.0910086	-0.0866621	-0.0604133	-0.107741	0.193233	-0.0653779	-0.0281992	-0.0472152
Avpr1a	mRNA	Avpr1a	Rattus rattus	mural	smooth_muscle	brain	brain					S. Chasseigneaux, Y. Moraca, V. Cochois-Guegan, A.C. Boulay, A. Gilbert, S. Le Crom, et al., Isolation and differential transcriptome of vascular smooth muscle cells and mid-capillary pericytes from the rat brain, Sci Rep. 8 (2018) 12272. 10.1038/s41598-018-30739-5.	-0.0420064	-0.0446091	-0.0360166	-0.000393634	-0.0370532	-0.0300754	-0.0366265	-0.0415455	-0.0375988	0.00914392	-0.0380972	0.0134878	-0.0209506	-0.0162762	0.0487348	-0.0363487	-0.00708255	0.0237293	-0.0116651	-0.00255808	0.0414296	-0.0297509	-0.0446091	0.0120373	-0.0378038	-0.00896465	-0.0446091	-0.0350337	-0.0346343	-0.0346045	-0.0342538	-0.0164992	-0.00708255	-0.0446091	-0.0175711	-0.0219103	-0.0295723
P2RY14	mRNA	P2ry14	Rattus rattus	mural	pericyte	brain	brain					S. Chasseigneaux, Y. Moraca, V. Cochois-Guegan, A.C. Boulay, A. Gilbert, S. Le Crom, et al., Isolation and differential transcriptome of vascular smooth muscle cells and mid-capillary pericytes from the rat brain, Sci Rep. 8 (2018) 12272. 10.1038/s41598-018-30739-5.	-0.245557	-0.557292	-0.714189	0.544277	-0.644047	-0.110122	-0.638299	-0.240989	-0.679289	0.689913	-0.623067	0.655376	0.263491	0.52052	0.398781	-0.676866	0.658602	0.448818	0.517171	0.647957	0.68146	0.500481	0.092359	0.313367	0.562436	0.764004	-0.301061	0.0968939	0.556959	-0.408425	0.700431	0.391622	-0.501107	-0.546165	0.413474	0.482979	-0.191201
Sox2	protein	Sox2	Mus musculus	ependymal	tanycyte_like	brain	circumventricular_organs	beta_tanycyte		yes		S. Chasseigneaux, Y. Moraca, V. Cochois-Guegan, A.C. Boulay, A. Gilbert, S. Le Crom, et al., Isolation and differential transcriptome of vascular smooth muscle cells and mid-capillary pericytes from the rat brain, Sci Rep. 8 (2018) 12272. 10.1038/s41598-018-30739-5.	0.247507	-0.287161	-0.285928	-0.303805	0.389172	0.0139911	0.354775	0.240498	0.423901	-0.30797	0.39912	-0.307537	-0.30389	-0.306668	-0.307483	-0.282759	-0.304689	-0.310875	-0.306843	-0.31316	-0.308294	-0.305442	0.126924	-0.30567	-0.298845	-0.301912	0.289282	-0.247577	-0.263712	0.603425	-0.299287	-0.290794	-0.258834	-0.228379	-0.309127	-0.300887	-0.105685
Pax6	protein	Pax6	Mus musculus	ependymal	tanycyte_like	brain	medulla_oblongata			yes		S. Chasseigneaux, Y. Moraca, V. Cochois-Guegan, A.C. Boulay, A. Gilbert, S. Le Crom, et al., Isolation and differential transcriptome of vascular smooth muscle cells and mid-capillary pericytes from the rat brain, Sci Rep. 8 (2018) 12272. 10.1038/s41598-018-30739-5.	1.09515	-0.16825	-0.183903	-0.13762	-0.181058	0.0364456	-0.18143	1.08326	-0.182193	-0.141906	-0.179892	-0.131918	-0.18161	-0.178675	-0.176072	-0.179	-0.163619	-0.184385	-0.18763	-0.17871	-0.186403	-0.182013	0.0226892	-0.194426	-0.187382	-0.144922	1.32675	-0.101393	-0.0359244	-0.153043	0.6297	-0.187085	-0.161775	-0.153202	-0.197113	-0.173859	-0.0446525
NeuroD	mRNA	Neurod1	Mus musculus	neuron		brain	hippocampus_SGZ					Z. Gao, K. Ure, J.L. Ables, D.C. Lagace, K.A. Nave, S. Goebbels, et al., Neurod1 is essential for the survival and maturation of adult-born neurons, Nat Neurosci. 12 (2009) 1090-2. 10.1038/nn.2385.	-0.106332	-0.12907	-0.0990767	0.0968994	-0.103418	-0.0800691	-0.102256	-0.10521	-0.107736	-0.0344267	-0.100899	-0.0188414	0.672617	0.0970758	-0.0907924	-0.086741	0.240792	0.215306	-0.0804067	-0.0374095	-0.0155426	-0.0488715	-0.084348	-0.0918093	0.619113	0.292791	-0.107582	-0.0125515	0.298568	-0.0965051	0.105422	-0.107381	-0.091228	-0.116313	-0.07328	0.404113	-0.12907
Gad2_65	mRNA	Gad2	Mus musculus	neuron	gabaergic_neuron	brain	MVN			yes		T. Kodama, S. Guerrero, M. Shin, S. Moghadam, M. Faulstich, S. du Lac, Neuronal classification and marker gene identification via single-cell expression profiling of brainstem vestibular neurons subserving cerebellar learning, J Neurosci. 32 (2012) 7819-31. 10.1523/JNEUROSCI.0543-12.2012.	-0.358409	-0.254291	-0.330976	0.365139	-0.336302	-0.296705	-0.325549	-0.356218	-0.335681	0.702988	-0.359352	-0.238801	1.37306	0.500867	-0.31633	-0.303479	1.37567	1.39241	-0.242605	0.46192	-0.319469	-0.314798	-0.316609	-0.185748	1.61601	-0.323792	-0.378337	-0.013857	1.16791	-0.37359	-0.334732	-0.389322	-0.348086	-0.203891	-0.384931	1.1414	-0.355037
VGluT_1	mRNA	Slc17a7	Mus musculus	neuron	glutamatergic_neuron	brain	MVN			yes		T. Kodama, S. Guerrero, M. Shin, S. Moghadam, M. Faulstich, S. du Lac, Neuronal classification and marker gene identification via single-cell expression profiling of brainstem vestibular neurons subserving cerebellar learning, J Neurosci. 32 (2012) 7819-31. 10.1523/JNEUROSCI.0543-12.2012.	-0.0547116	-0.0251245	-0.0566452	0.0488962	-0.0715985	-0.0337372	-0.0684024	-0.0520316	-0.0729989	-0.0836917	-0.0770738	-0.0773343	-0.0526003	-0.0770193	-0.0864888	-0.0495207	-0.0869113	-0.0931758	-0.0811524	-0.0759646	-0.0852714	-0.064308	-0.0501877	-0.0845656	-0.0797036	0.115738	-0.0737632	0.290192	-0.0795434	-0.086271	4.70415	-0.0481152	-0.0500642	-0.00258883	-0.0644281	-0.0952546	-0.0523431
Spp1	mRNA	Spp1	Mus musculus	neuron		brain	MVN			yes		T. Kodama, S. Guerrero, M. Shin, S. Moghadam, M. Faulstich, S. du Lac, Neuronal classification and marker gene identification via single-cell expression profiling of brainstem vestibular neurons subserving cerebellar learning, J Neurosci. 32 (2012) 7819-31. 10.1523/JNEUROSCI.0543-12.2012.	-0.0641213	0.0234332	0.0542328	0.00814057	-0.0148203	0.0872942	0.00166743	-0.0641093	-0.0207027	0.103627	-0.0437253	-0.0704286	-0.0817189	-0.0164549	-0.075393	0.0533968	-0.0715115	-0.0909718	-0.0865798	-0.0262855	-0.0723662	0.0018361	-0.054572	-0.0928257	-0.0655332	-0.0806477	-0.0657956	0.0544195	-0.099881	-0.0838539	1.48229	-0.0662355	0.82675	0.0722192	0.000854021	0.192886	-0.106588
Scn4b	mRNA	Scn4b	Mus musculus	neuron		brain	MVN			yes		T. Kodama, S. Guerrero, M. Shin, S. Moghadam, M. Faulstich, S. du Lac, Neuronal classification and marker gene identification via single-cell expression profiling of brainstem vestibular neurons subserving cerebellar learning, J Neurosci. 32 (2012) 7819-31. 10.1523/JNEUROSCI.0543-12.2012.	-0.114621	0.00846855	-0.0461378	0.113522	-0.111638	-0.0873499	-0.101049	-0.117935	-0.123101	0.317924	-0.120715	0.102154	-0.16265	0.237865	-0.161367	-0.0409957	0.00434578	-0.160285	-0.0260005	-0.00737445	0.0980356	0.215729	-0.122013	-0.174252	-0.161773	0.258937	-0.0720154	0.0633964	-0.119826	-0.145962	0.75788	0.698063	-0.124846	0.024877	1.00485	0.116178	-0.137682
GlyT2	mRNA	Slc6a5	Mus musculus	neuron	glycinergic_neuron	brain	MVN			yes		T. Kodama, S. Guerrero, M. Shin, S. Moghadam, M. Faulstich, S. du Lac, Neuronal classification and marker gene identification via single-cell expression profiling of brainstem vestibular neurons subserving cerebellar learning, J Neurosci. 32 (2012) 7819-31. 10.1523/JNEUROSCI.0543-12.2012.	-0.350659	-0.35766	-0.291928	0.356986	-0.32755	-0.298164	-0.316517	-0.351466	-0.329478	1.24454	-0.350552	-0.237503	0.653669	1.23442	-0.377004	-0.268102	1.04572	0.860488	-0.343404	0.335116	-0.329604	-0.369451	-0.328776	-0.386335	0.621722	-0.330567	-0.353738	0.0180652	0.660726	-0.345712	-0.377482	-0.30628	-0.326493	-0.340215	-0.369706	1.53592	-0.369166
Gad1_67	mRNA	Gad1	Mus musculus	neuron	gabaergic_neuron	brain	MVN			yes		T. Kodama, S. Guerrero, M. Shin, S. Moghadam, M. Faulstich, S. du Lac, Neuronal classification and marker gene identification via single-cell expression profiling of brainstem vestibular neurons subserving cerebellar learning, J Neurosci. 32 (2012) 7819-31. 10.1523/JNEUROSCI.0543-12.2012.	-0.282642	-0.280719	-0.217849	0.259903	-0.270057	0.0269248	-0.261153	-0.286126	-0.267341	0.465482	-0.294378	-0.270094	1.15421	0.638461	-0.31912	-0.202067	1.10577	0.633076	-0.302541	0.447148	-0.295845	-0.286517	0.491269	-0.322445	1.41057	-0.28331	-0.259663	0.0770124	1.10805	-0.279458	-0.312367	-0.312688	-0.251324	-0.25498	-0.297881	1.588	-0.269043
Coch	mRNA	Coch	Mus musculus	neuron	inhibitory_premotor_neuron	brain	MVN			yes		T. Kodama, S. Guerrero, M. Shin, S. Moghadam, M. Faulstich, S. du Lac, Neuronal classification and marker gene identification via single-cell expression profiling of brainstem vestibular neurons subserving cerebellar learning, J Neurosci. 32 (2012) 7819-31. 10.1523/JNEUROSCI.0543-12.2012.	-0.0920118	-0.118034	-0.102631	0.0780501	-0.091675	0.0160179	-0.094629	-0.0993392	-0.0955514	0.100587	-0.0827313	0.0131832	0.0356116	0.0297933	0.053788	-0.0941553	0.0577686	0.0361276	0.0441163	0.529357	0.0255286	0.0827084	-0.0733929	0.0758336	0.0588267	0.0609137	-0.0674559	-0.0184703	-0.00431463	-0.0926725	-0.00604574	0.0443609	0.621804	-0.0828501	-0.0228617	-0.0148399	-0.0914251
Adcyap1	mRNA	Adcyap1	Mus musculus	neuron	excitatory_E3_neuron	brain	MVN			yes		T. Kodama, S. Guerrero, M. Shin, S. Moghadam, M. Faulstich, S. du Lac, Neuronal classification and marker gene identification via single-cell expression profiling of brainstem vestibular neurons subserving cerebellar learning, J Neurosci. 32 (2012) 7819-31. 10.1523/JNEUROSCI.0543-12.2012.	-0.114048	-0.166864	-0.106433	0.119712	-0.110007	-0.10815	-0.102521	-0.111712	-0.113485	-0.135275	-0.119661	0.0751491	-0.144648	-0.163708	0.6323	-0.106785	-0.112102	-0.129887	0.865545	0.0854405	0.396071	0.34935	-0.123206	0.846383	-0.139629	0.319047	-0.112764	0.105751	-0.101003	-0.155113	0.0260542	0.363768	-0.139662	-0.165197	0.0705955	-0.17446	-0.117201
VGluT_2	mRNA	Slc17a6	Mus musculus	neuron	glutamatergic_neuron	brain	MVN			yes		T. Kodama, S. Guerrero, M. Shin, S. Moghadam, M. Faulstich, S. du Lac, Neuronal classification and marker gene identification via single-cell expression profiling of brainstem vestibular neurons subserving cerebellar learning, J Neurosci. 32 (2012) 7819-31. 10.1523/JNEUROSCI.0543-12.2012.	-0.344195	-0.264777	-0.260237	0.329223	-0.296093	-0.276862	-0.287263	-0.347765	-0.29299	-0.200341	-0.319254	1.02861	-0.344224	-0.34889	0.965313	-0.247872	-0.33786	-0.351841	0.840037	0.365961	1.13395	1.12904	-0.328815	1.00435	-0.390407	1.01379	-0.335081	0.00834135	-0.162503	-0.362107	0.330996	1.0508	-0.265748	-0.232859	1.17188	-0.397999	-0.339861
Crhbp	mRNA	Crhbp	Mus musculus	neuron	inhibitory_neuron	brain	MVN			yes		T. Kodama, S. Guerrero, M. Shin, S. Moghadam, M. Faulstich, S. du Lac, Neuronal classification and marker gene identification via single-cell expression profiling of brainstem vestibular neurons subserving cerebellar learning, J Neurosci. 32 (2012) 7819-31. 10.1523/JNEUROSCI.0543-12.2012.	-0.0466479	-0.0544636	-0.0458626	0.00516565	-0.0424883	-0.0406121	-0.0366387	-0.0473081	-0.0486159	0.0458652	-0.0495748	-0.0169427	-0.0479474	-0.0364404	-0.00584099	-0.0461951	0.271093	-0.0449162	0.034891	-0.00675537	-0.0418125	-0.0393742	-0.0488559	0.005176	-0.0408396	-0.0419894	-0.0393441	-0.0161243	-0.0344944	-0.0544636	0.0123234	-0.0136207	-0.0544636	-0.0291374	-0.0544636	-0.0544636	-0.039412
Crh	mRNA	Crh	Mus musculus	neuron		brain	MVN			yes		T. Kodama, S. Guerrero, M. Shin, S. Moghadam, M. Faulstich, S. du Lac, Neuronal classification and marker gene identification via single-cell expression profiling of brainstem vestibular neurons subserving cerebellar learning, J Neurosci. 32 (2012) 7819-31. 10.1523/JNEUROSCI.0543-12.2012.	-0.0508611	-0.0489476	-0.0397262	0.0105953	-0.0428425	-0.0447124	-0.0415596	-0.050305	-0.0468243	-0.0455046	-0.0394555	-0.0140568	-0.0300947	-0.0431299	-0.0336046	-0.0407247	-0.038109	-0.0527432	-0.0336158	0.0523801	0.03506	0.0127078	-0.0262608	-0.0299193	-0.0283284	0.325115	-0.0579894	-0.00798514	0.00447671	-0.055532	0.789598	-0.0246658	-0.0655574	-0.0528804	-0.053693	-0.0370431	-0.0655574
Cx32	mRNA	Gjb1	non_specific	oligodendrocyte		brain	brain				astrocyte_connecting	J. Manjarrez-Marmolejo, J. Franco-Pérez, Gap Junction Blockers- An Overview of their Effects on Induced Seizures in Animal Models, Current Neuropharmacology. 14 (2016) 759-71. 10.2174/1570159X14666160603115.	-0.185677	-0.163692	-0.160993	-0.197391	0.405459	-0.159045	0.207413	-0.186408	0.490649	-0.203356	0.842868	-0.195749	-0.193383	-0.20672	-0.191108	-0.158309	-0.201102	-0.207522	-0.200894	-0.198949	-0.200236	-0.203663	-0.180775	-0.196582	-0.189868	-0.204806	-0.184607	-0.131047	-0.197456	0.057194	-0.205175	-0.199096	-0.196946	-0.1507	-0.200958	-0.203699	-0.194878
Cx47	mRNA	Gjc2	non_specific	oligodendrocyte		brain	brain				astrocyte_connecting	J. Manjarrez-Marmolejo, J. Franco-Pérez, Gap Junction Blockers- An Overview of their Effects on Induced Seizures in Animal Models, Current Neuropharmacology. 14 (2016) 759-71. 10.2174/1570159X14666160603115.	-0.195788	-0.173406	-0.203945	-0.206205	0.426307	-0.162646	0.244609	-0.201645	0.483789	-0.212376	0.823883	-0.200495	-0.208506	-0.205938	-0.212314	-0.204099	-0.204134	-0.208302	-0.202498	-0.207448	-0.211799	-0.210264	-0.207687	-0.220899	-0.214176	-0.208689	-0.168872	-0.156229	-0.201443	0.378533	-0.202323	-0.209048	-0.166863	-0.167267	-0.211272	-0.190625	-0.207528
Cx45	mRNA	Gjc1	Mus musculus	neuron		CNS	brain					J. Manjarrez-Marmolejo, J. Franco-Pérez, Gap Junction Blockers- An Overview of their Effects on Induced Seizures in Animal Models, Current Neuropharmacology. 14 (2016) 759-71. 10.2174/1570159X14666160603115.	-0.0705475	2.27504	-0.101878	0.00718157	-0.101629	0.290928	-0.0985196	-0.0805345	-0.10723	0.00727823	-0.108112	0.0270146	-0.0416673	-0.0656165	0.0393837	-0.0959429	0.0458499	-0.0040894	-0.00281017	0.0939111	-0.0125531	-0.00265953	-0.0883229	0.0377825	0.055756	-0.0362955	-0.0441125	-0.0367647	-0.00312857	-0.118197	-0.0754847	-0.0705975	0.202643	1.93193	0.0443567	-0.012018	0.381009
Cx36	mRNA	Gjd2	non_specific	neuron		brain	hippocampus_cortex				seizure	J. Manjarrez-Marmolejo, J. Franco-Pérez, Gap Junction Blockers- An Overview of their Effects on Induced Seizures in Animal Models, Current Neuropharmacology. 14 (2016) 759-71. 10.2174/1570159X14666160603115.	-0.0924899	-0.109644	-0.10903	0.0825206	-0.0884308	-0.0961672	-0.0858187	-0.0926142	-0.0758335	0.10209	-0.113038	0.109662	-0.00265372	0.0384547	0.118722	-0.0997536	0.0873626	0.00864994	0.0857879	0.0690976	0.0996681	0.068335	-0.105474	0.0478169	0.0259251	0.107823	-0.103513	-0.03234	0.0485216	-0.100087	0.212223	0.157496	-0.10222	-0.113601	0.269892	0.0989563	-0.100015
Proenkephalin	mRNA	Penk	Mus musculus	neuron	enkephalinergic	brain	central amygdala					T. Paretkar, E. Dimitrov, Activation of enkephalinergic (Enk) interneurons in the central amygdala (CeA) buffers the behavioral effects of persistent pain, Neurobiol Dis. 124 (2019) 364-72. 10.1016/j.nbd.2018.12.005.	-0.154364	-0.106168	-0.0337322	0.112626	-0.0882992	-0.114687	-0.0724169	-0.153863	-0.0938319	-0.0281807	-0.120187	0.23597	0.264361	0.175102	0.291034	-0.037572	-0.119328	0.606946	0.0884595	-0.124921	0.315824	-0.0806975	-0.0918146	0.138243	0.361898	0.158886	-0.162899	0.00791283	0.0976985	-0.148697	-0.170265	0.0217658	-0.102443	-0.0986979	-0.231183	-0.209051	-0.184853
NDRG2	mRNA	Ndrg2	Mus musculus	astrocyte		brain	brain				cortex and thalamus	Z. Zhang, Z. Ma, W. Zou, H. Guo, M. Liu, Y. Ma, et al., The Appropriate Marker for Astrocytes: Comparing the Distribution and Expression of Three Astrocytic Markers in Different Mouse Cerebral Regions, Biomed Res Int. 2019 (2019) 9605265. 10.1155/2019/9605265.	1.9508	-0.0532833	-0.321708	-0.282264	-0.276363	0.0909899	-0.254937	2.0293	-0.287329	-0.274384	-0.312097	-0.323764	-0.302751	-0.335075	-0.335667	-0.294794	-0.213626	-0.323081	-0.321139	-0.226122	-0.293029	-0.281777	0.0191692	-0.332124	-0.140114	-0.276868	1.63134	0.0409348	-0.219084	-0.317138	-0.293811	-0.333087	0.154783	0.0284005	-0.174817	-0.27554	0.201233
S100beta	mRNA	S100b	Mus musculus	astrocyte		brain	brain	ependymal			cortex and thalamus	Z. Zhang, Z. Ma, W. Zou, H. Guo, M. Liu, Y. Ma, et al., The Appropriate Marker for Astrocytes: Comparing the Distribution and Expression of Three Astrocytic Markers in Different Mouse Cerebral Regions, Biomed Res Int. 2019 (2019) 9605265. 10.1155/2019/9605265.	0.373645	-0.224076	-0.237027	-0.243772	0.220742	0.175348	-0.0323072	0.391299	0.111211	-0.208782	1.08321	-0.247675	-0.288112	-0.241285	-0.296579	-0.228812	-0.271958	-0.29133	-0.281143	-0.232868	-0.255006	-0.271803	0.389107	-0.259205	-0.251569	-0.267744	0.208524	-0.0224567	-0.271829	0.26279	-0.154285	-0.178894	-0.136149	-0.116636	-0.306221	-0.226255	-0.304341
GFAP	mRNA_protein	Gfap	non_specific	astrocyte		brain	brain	tanycyte			corpus callosum and hippocampus	Z. Zhang, Z. Ma, W. Zou, H. Guo, M. Liu, Y. Ma, et al., The Appropriate Marker for Astrocytes: Comparing the Distribution and Expression of Three Astrocytic Markers in Different Mouse Cerebral Regions, Biomed Res Int. 2019 (2019) 9605265. 10.1155/2019/9605265.	0.770938	-0.0798692	-0.10055	-0.119598	-0.0978887	-0.00145561	-0.0984285	0.29	-0.0929137	-0.125738	-0.103747	-0.129724	-0.119766	-0.124919	-0.11001	-0.090527	-0.123072	-0.111863	-0.124287	-0.121077	-0.11313	-0.127193	-0.119961	-0.132141	-0.116164	-0.117366	4.15064	0.137993	-0.0914385	-0.106805	-0.12521	-0.126941	-0.0404589	0.0789247	-0.121576	-0.141947	-0.0607058
GLT1	protein	Slc1a2	non_specific	astrocyte		brain	brain				CNS	A.M. Jurga, M. Paleczna, J. Kadluczka, K.Z. Kuter, Beyond the GFAP-Astrocyte Protein Markers in the Brain, Biomolecules. 11 (2021) 10.3390/biom11091361.	2.35365	-0.192042	-0.397615	-0.29555	-0.402822	0.139265	-0.394737	2.51105	-0.408732	-0.360485	-0.414739	-0.320184	-0.201352	-0.280295	-0.242346	-0.368582	-0.27267	-0.202413	-0.0946381	-0.387635	-0.339888	-0.373336	0.76841	-0.272394	-0.31233	-0.312648	1.63412	-0.0901633	-0.240085	-0.384482	-0.396981	-0.285493	-0.33786	-0.0964159	-0.450613	-0.444675	-0.344011
KIR4.1	protein	Kcnj10	non_specific	astrocyte		brain	brain					A.M. Jurga, M. Paleczna, J. Kadluczka, K.Z. Kuter, Beyond the GFAP-Astrocyte Protein Markers in the Brain, Biomolecules. 11 (2021) 10.3390/biom11091361.	1.13429	-0.291278	-0.363644	-0.434932	0.283726	-0.0679281	0.191373	1.16913	0.3523	-0.450152	0.440204	-0.440763	-0.425039	-0.440875	-0.439563	-0.359066	-0.434291	-0.429897	-0.42498	-0.436256	-0.439708	-0.436778	0.0339007	-0.435007	-0.436981	-0.435018	0.993034	-0.262205	-0.433463	0.196816	-0.437313	-0.414491	-0.388372	-0.204828	-0.430213	-0.442061	-0.369145
ALDH1L1	protein	Aldh1l1	non_specific	astrocyte	protoplasmic_astrocyte	brain	brain					A.M. Jurga, M. Paleczna, J. Kadluczka, K.Z. Kuter, Beyond the GFAP-Astrocyte Protein Markers in the Brain, Biomolecules. 11 (2021) 10.3390/biom11091361.	1.30019	-0.189414	-0.220339	-0.212531	-0.120804	-0.0748413	-0.125173	1.36096	-0.119304	-0.218758	-0.103756	-0.216577	-0.205055	-0.222173	-0.214962	-0.212198	-0.216455	-0.207185	-0.214443	-0.210995	-0.213396	-0.212549	-0.207511	-0.222883	-0.192316	-0.202666	1.02381	-0.119147	-0.176878	-0.180053	-0.21023	-0.226771	-0.132748	-0.121811	-0.221239	-0.227728	0.265107
DIO2	protein	Dio2	non_specific	astrocyte		brain	brain	tanycyte				A.M. Jurga, M. Paleczna, J. Kadluczka, K.Z. Kuter, Beyond the GFAP-Astrocyte Protein Markers in the Brain, Biomolecules. 11 (2021) 10.3390/biom11091361.	0.823097	-0.0902287	-0.115715	-0.121185	-0.112685	0.00946081	-0.115565	0.963134	-0.110878	-0.123707	-0.108646	-0.126814	-0.122783	-0.119398	-0.132958	-0.106982	-0.130378	-0.132938	-0.135741	-0.131509	-0.124557	-0.108851	0.208508	-0.101752	-0.121118	-0.128041	0.00834524	-0.110785	-0.135557	-0.112088	-0.138933	-0.0918259	-0.036242	-0.0821087	0.0467234	-0.133325	-0.143434
GAT_1	protein	Slc6a1	non_specific	astrocyte	astrocyte_process	brain	brain				adjacent_neuronal_synapses	A.M. Jurga, M. Paleczna, J. Kadluczka, K.Z. Kuter, Beyond the GFAP-Astrocyte Protein Markers in the Brain, Biomolecules. 11 (2021) 10.3390/biom11091361.	1.34641	-0.585472	-0.621265	-0.257716	-0.03686	-0.0525783	-0.0186198	1.43283	0.0547984	-0.380067	-0.194788	-0.469266	-0.18114	-0.0335867	-0.135097	-0.600478	0.0377225	-0.00839857	-0.298203	-0.0450797	-0.407788	-0.258741	0.420985	-0.0479256	-0.0340818	-0.403329	0.851156	-0.290996	-0.241926	-0.0112988	-0.642403	-0.637053	-0.453015	-0.522876	-0.629902	0.675103	-0.604673
PRODH	protein	Prodh	non_specific	astrocyte		brain	brain					A.M. Jurga, M. Paleczna, J. Kadluczka, K.Z. Kuter, Beyond the GFAP-Astrocyte Protein Markers in the Brain, Biomolecules. 11 (2021) 10.3390/biom11091361.	0.940083	-0.260088	-0.287678	-0.00929615	-0.291849	-0.0539741	-0.294812	0.989335	-0.297304	-0.00570868	-0.279222	-0.0345465	-0.0330098	-0.0447599	-0.0134248	-0.279444	0.0616754	0.0562851	0.0398828	0.0365434	-0.0116908	-0.0216591	-0.21974	0.00842757	0.0135033	0.0351464	0.760194	-0.102093	0.0504092	-0.244319	-0.0805688	-0.0960417	0.264962	-0.228431	-0.0963799	-0.0317779	0.183867
Ptch1	protein	Ptch1	non_specific	Bergmann_glia		brain	cerebellum			yes		A.M. Jurga, M. Paleczna, J. Kadluczka, K.Z. Kuter, Beyond the GFAP-Astrocyte Protein Markers in the Brain, Biomolecules. 11 (2021) 10.3390/biom11091361.	1.66244	-0.383945	-0.470823	-0.259092	-0.156618	-0.0971149	-0.194597	1.76616	-0.12961	-0.230671	-0.0958605	-0.275987	-0.251631	-0.202357	-0.336837	-0.445676	-0.259397	-0.284438	-0.228262	-0.264558	-0.259261	-0.265134	-0.0719159	-0.268664	-0.330481	-0.271191	1.14597	-0.305757	-0.283051	-0.136711	-0.291361	-0.280946	-0.135321	-0.336808	-0.278259	-0.223386	-0.029866
SNAT3	protein	Slc38a3	non_specific	astrocyte		brain	brain					A.M. Jurga, M. Paleczna, J. Kadluczka, K.Z. Kuter, Beyond the GFAP-Astrocyte Protein Markers in the Brain, Biomolecules. 11 (2021) 10.3390/biom11091361.	1.33526	1.50211	-0.240533	-0.23427	-0.209379	0.373849	-0.221852	1.44932	-0.220546	-0.239074	-0.159694	-0.239118	-0.232233	-0.231174	-0.241735	-0.228907	-0.238194	-0.234836	-0.244163	-0.214916	-0.240237	-0.229272	0.36415	-0.238857	-0.2305	-0.235075	0.673281	-0.127263	-0.240844	-0.207638	-0.235646	-0.226883	0.265178	1.22149	-0.24336	-0.242284	1.41712
NFIX	protein	Nfix	non_specific	astrocyte		brain	brain			yes	adult	A.M. Jurga, M. Paleczna, J. Kadluczka, K.Z. Kuter, Beyond the GFAP-Astrocyte Protein Markers in the Brain, Biomolecules. 11 (2021) 10.3390/biom11091361.	0.24398	-0.244879	-0.133143	-0.438379	0.562002	0.117872	0.491694	0.219292	0.648045	-0.499868	0.614084	-0.503115	-0.500209	-0.480779	-0.506959	-0.134382	-0.371165	-0.475349	-0.380267	-0.499946	-0.407227	-0.499992	0.256478	-0.502131	-0.212549	-0.438581	0.360682	-0.351331	0.257957	0.508619	-0.114038	-0.473482	0.0855192	-0.206123	-0.498736	-0.488018	0.233524
ABHD5	protein	Abhd5	non_specific	astrocyte		brain	brain					A.M. Jurga, M. Paleczna, J. Kadluczka, K.Z. Kuter, Beyond the GFAP-Astrocyte Protein Markers in the Brain, Biomolecules. 11 (2021) 10.3390/biom11091361.	-0.102845	-0.0463498	-0.0999751	-0.117693	0.239319	-0.101121	0.103878	-0.103455	0.332546	-0.0905763	0.483791	-0.11871	-0.142083	-0.0967416	-0.150293	-0.0972059	-0.0957112	-0.158717	-0.13051	-0.114226	-0.162102	-0.112905	-0.118292	-0.146383	-0.0722874	-0.110934	-0.11434	-0.19105	-0.137147	0.0261178	-0.0873388	-0.119937	0.0589092	-0.0496036	-0.12628	-0.0982636	-0.145919
PFKFB3	protein	Pfkfb3	non_specific	astrocyte		brain	brain					A.M. Jurga, M. Paleczna, J. Kadluczka, K.Z. Kuter, Beyond the GFAP-Astrocyte Protein Markers in the Brain, Biomolecules. 11 (2021) 10.3390/biom11091361.	0.431698	-0.274562	0.61821	0.0223184	-0.189247	-0.236161	-0.157398	0.503661	-0.180263	0.250687	-0.317842	0.0560838	-0.165232	0.22708	-0.191269	0.601785	0.0822787	-0.0506759	-0.154495	0.00128747	0.0173442	-0.0513272	-0.289087	-0.217995	-0.292922	0.0274031	0.0363134	-0.216089	-0.214214	-0.0618355	0.0768004	-0.176301	-0.300867	-0.251628	0.41369	0.49349	-0.292309
SDSL	protein	Sdsl	non_specific	astrocyte		brain	brain					A.M. Jurga, M. Paleczna, J. Kadluczka, K.Z. Kuter, Beyond the GFAP-Astrocyte Protein Markers in the Brain, Biomolecules. 11 (2021) 10.3390/biom11091361.	0.0327671	-0.151493	-0.211438	0.172159	-0.221738	-0.172519	-0.225949	0.0311313	-0.214137	0.379328	-0.219762	0.2225	-0.172925	0.186044	-0.095903	-0.200402	0.405458	-0.139919	0.0465541	0.340799	0.170807	0.198274	-0.19985	-0.0748009	0.266258	0.287371	0.058567	0.0393985	0.103099	-0.221175	0.221081	0.0243186	-0.238557	-0.147781	0.33106	0.316932	-0.199946
GLP_1R	protein	Glp1r	non_specific	astrocyte		brain	brain					A.M. Jurga, M. Paleczna, J. Kadluczka, K.Z. Kuter, Beyond the GFAP-Astrocyte Protein Markers in the Brain, Biomolecules. 11 (2021) 10.3390/biom11091361.	-0.0851793	-0.0902838	-0.0772326	0.0698575	-0.0822927	-0.0816054	-0.0847782	-0.0864592	-0.0827449	0.0804784	-0.0774507	-0.011162	-0.0594994	0.395189	0.0216319	-0.0768688	0.13008	0.00769562	0.0161573	-0.0576665	-0.0478649	0.0244946	-0.0769734	0.756455	-0.0835459	-0.0151894	-0.0841643	-0.0587877	0.1221	-0.0755287	0.474375	-0.0911133	-0.0943755	-0.0942328	-0.106962	0.00724488	-0.0918318
BEST1	protein	Best1	Mus musculus	astrocyte		brain	brain				glutamatergic synapses	A.M. Jurga, M. Paleczna, J. Kadluczka, K.Z. Kuter, Beyond the GFAP-Astrocyte Protein Markers in the Brain, Biomolecules. 11 (2021) 10.3390/biom11091361.	-0.0882704	-0.0610587	-0.0857384	0.0625412	-0.0802983	-0.0672322	-0.0846429	-0.0892421	-0.0769147	0.00684205	-0.0765279	0.0601166	0.0757299	-0.00315515	0.123399	-0.0860721	0.0177674	0.0352306	0.273293	0.020089	0.0677918	0.0806457	-0.0776429	0.125924	0.283506	0.178296	-0.0867837	-0.055882	0.158056	-0.0647974	0.0109418	-0.00886442	-0.0189485	-0.0562335	-0.0675683	-0.0384041	-0.0397363
IDI1	protein	Idi1	non_specific	astrocyte		brain	brain					A.M. Jurga, M. Paleczna, J. Kadluczka, K.Z. Kuter, Beyond the GFAP-Astrocyte Protein Markers in the Brain, Biomolecules. 11 (2021) 10.3390/biom11091361.	0.0793881	-0.202627	-0.192515	-0.0157197	0.0311169	-0.10633	-0.0344573	0.0825481	0.0788783	-0.000538481	0.129251	-0.016056	-0.0639741	-0.133056	-0.0386215	-0.187695	0.138617	-0.0495633	-0.095573	0.108064	-0.016859	-0.0845206	-0.070797	-0.0597046	0.20991	0.0657393	0.102902	-0.0740238	0.0780995	0.0907536	-0.0408544	-0.181979	-0.161478	-0.142519	-0.0656115	-0.0194259	-0.165465
NKX2_1	protein	Nkx2-1	non_specific	astrocyte		brain	brain					A.M. Jurga, M. Paleczna, J. Kadluczka, K.Z. Kuter, Beyond the GFAP-Astrocyte Protein Markers in the Brain, Biomolecules. 11 (2021) 10.3390/biom11091361.	-0.0031664	-0.0031664	-0.0031664	-0.00295706	-0.0031664	-0.0031664	-0.0031664	-0.0031664	-0.0031664	-0.0031664	-0.0031664	-0.0031664	-0.0031664	-0.0031664	-0.0031664	-0.0031664	-0.0031664	-0.0031664	-0.0031664	-0.0031664	-0.0031664	-0.0031664	-0.0031664	-0.0031664	-0.0031664	0.00393308	-0.0031664	-0.0031664	-0.0031664	-0.0031664	-0.0031664	-0.0031664	-0.0031664	-0.0031664	-0.0031664	-0.0031664	-0.0031664
AQP4	protein	Aqp4	non_specific	astrocyte	velate_astrocyte	brain	brain					A.M. Jurga, M. Paleczna, J. Kadluczka, K.Z. Kuter, Beyond the GFAP-Astrocyte Protein Markers in the Brain, Biomolecules. 11 (2021) 10.3390/biom11091361.	1.80503	-0.191294	-0.202358	-0.260277	-0.236865	-0.0570341	-0.229823	1.68623	-0.240327	-0.267468	-0.246338	-0.268137	-0.251204	-0.26679	-0.258188	-0.18738	-0.27016	-0.263403	-0.235679	-0.262482	-0.263745	-0.274212	-0.243375	-0.259302	-0.237957	-0.270957	2.9406	-0.0348338	-0.259367	-0.248538	-0.272281	-0.254707	-0.158453	-0.0725573	-0.268299	-0.273238	-0.17674
connexin_43	protein	Gja1	non_specific	astrocyte		brain	brain	alpha_tanycyte			development and adult	A.M. Jurga, M. Paleczna, J. Kadluczka, K.Z. Kuter, Beyond the GFAP-Astrocyte Protein Markers in the Brain, Biomolecules. 11 (2021) 10.3390/biom11091361.	1.89944	0.00606047	-0.226989	-0.284862	-0.247153	0.0058938	-0.243094	1.88054	-0.244756	-0.290105	-0.257291	-0.2891	-0.27993	-0.292674	-0.280377	-0.219439	-0.2844	-0.281167	-0.291426	-0.291537	-0.295574	-0.28869	-0.240863	-0.274242	-0.268135	-0.29107	2.38955	-0.0730008	-0.298418	-0.2567	-0.300191	-0.280138	0.389211	0.037789	-0.295849	-0.285467	-0.237364
NEBL	protein	Nebl	non_specific	astrocyte		brain	brain					A.M. Jurga, M. Paleczna, J. Kadluczka, K.Z. Kuter, Beyond the GFAP-Astrocyte Protein Markers in the Brain, Biomolecules. 11 (2021) 10.3390/biom11091361.	1.30658	0.780625	-0.89878	0.30044	-0.891515	0.106394	-0.905545	1.31499	-0.905366	0.465725	-0.857012	0.328071	0.304603	0.572083	0.0528308	-0.849033	0.229258	0.442135	0.451937	0.101592	0.356176	0.291929	0.475179	-0.129858	-0.168329	0.235732	1.45823	-0.312522	0.0477181	-0.665308	0.288592	0.926635	0.231794	0.658441	0.280552	0.448557	0.320687
Pyruvate_carboxylase	protein	Pcx	non_specific	glial		brain	brain					A.M. Jurga, M. Paleczna, J. Kadluczka, K.Z. Kuter, Beyond the GFAP-Astrocyte Protein Markers in the Brain, Biomolecules. 11 (2021) 10.3390/biom11091361.	0.587219	-0.236412	-0.3944	-0.0553649	-0.0694256	-0.157871	-0.138059	0.544588	-0.0561454	0.108706	0.0936446	-0.0449141	-0.192301	-0.0133509	-0.239985	-0.375388	0.0795056	-0.241306	-0.183983	0.024893	-0.0591682	-0.0795653	-0.244227	-0.193343	-0.1408	0.13366	0.939924	-0.249125	-0.174332	-0.141882	-0.0682054	-0.0948287	-0.133757	-0.212648	-0.0331866	0.144956	0.0111131
APOE	protein	Apoe	non_specific	glial		brain	brain					A.M. Jurga, M. Paleczna, J. Kadluczka, K.Z. Kuter, Beyond the GFAP-Astrocyte Protein Markers in the Brain, Biomolecules. 11 (2021) 10.3390/biom11091361.	1.8039	0.902931	-0.215984	-0.462334	-0.0427545	0.457322	0.117768	1.78074	-0.118196	-0.492964	-0.332738	-0.485994	-0.432747	-0.443337	-0.450944	-0.234263	-0.484144	-0.435407	-0.465358	-0.47096	-0.491225	-0.483018	0.410636	-0.455126	-0.405675	-0.474692	2.13305	0.0711527	-0.428069	-0.270686	-0.511371	-0.432965	0.635117	0.890904	-0.479149	-0.49283	0.283762
G6PC	protein	G6pc	non_specific	astrocyte		brain	brain					A.M. Jurga, M. Paleczna, J. Kadluczka, K.Z. Kuter, Beyond the GFAP-Astrocyte Protein Markers in the Brain, Biomolecules. 11 (2021) 10.3390/biom11091361.	-0.0127659	0.0185553	-0.0144958	-0.0130288	-0.0138681	0.00723937	-0.0138836	-0.0124595	-0.013331	-0.0144958	-0.0144958	-0.0128392	-0.0112507	-0.0144958	-0.0144958	-0.0144958	-0.0144958	-0.0102307	-0.0144958	-0.0144958	-0.0144958	-0.00901145	-0.00332518	-0.0144958	-0.0144958	-0.0144958	-0.0144958	0.0905179	-0.0144958	-0.0144958	-0.0144958	-0.0144958	-0.00202448	0.0107296	-0.00101738	-0.0144958	-0.0144958
PKM2	protein	Pkm	non_specific	astrocyte		brain	brain					A.M. Jurga, M. Paleczna, J. Kadluczka, K.Z. Kuter, Beyond the GFAP-Astrocyte Protein Markers in the Brain, Biomolecules. 11 (2021) 10.3390/biom11091361.	0.0587949	0.147088	-0.207024	-0.101931	0.150171	-0.0373265	0.0821362	0.0803719	0.135011	0.0149424	0.321457	-0.100252	-0.229428	-0.128477	-0.177921	-0.201308	-0.0508278	-0.214822	-0.218217	-0.0303187	-0.137247	-0.104938	-0.0797501	-0.179908	-0.180375	-0.0749473	-0.0817639	-0.0402508	-0.236065	0.367451	0.0974088	-0.209015	-0.141556	0.196811	0.0366632	-0.0926677	0.0358971
NKX3_1	protein	Nkx3-1	non_specific	astrocyte		brain	olfatory bulb					A.M. Jurga, M. Paleczna, J. Kadluczka, K.Z. Kuter, Beyond the GFAP-Astrocyte Protein Markers in the Brain, Biomolecules. 11 (2021) 10.3390/biom11091361.	-0.00667214	-0.00667214	-0.00667214	-0.00562507	-0.00667214	-0.00667214	-0.00667214	-0.00667214	-0.00667214	-0.00428106	-0.00667214	-0.00667214	-0.00667214	0.000318198	-0.00667214	-0.00667214	-0.00667214	-0.00667214	-0.00667214	-0.00667214	-0.00667214	-0.00667214	-0.00667214	-0.00667214	-0.00667214	-0.00667214	-0.00667214	-0.00667214	-0.00667214	-0.00667214	0.00364401	-0.00667214	-0.00667214	-0.00667214	-0.00667214	-0.00667214	-0.00667214
HIBADH	protein	Hibadh	non_specific	astrocyte		brain	brain					A.M. Jurga, M. Paleczna, J. Kadluczka, K.Z. Kuter, Beyond the GFAP-Astrocyte Protein Markers in the Brain, Biomolecules. 11 (2021) 10.3390/biom11091361.	0.0057508	-0.324596	-0.185342	0.100628	-0.118303	-0.0850953	-0.183121	0.00852367	-0.0696227	0.206184	-0.0045086	0.114877	0.0579692	0.111633	-0.0152639	-0.17877	0.175439	0.063042	-0.0299902	0.0829894	0.0866465	0.0826084	-0.116708	-0.0447009	0.143873	0.141332	-0.0679319	-0.229327	0.162005	-0.148355	0.313497	0.00358384	0.0387301	-0.275722	0.0448667	0.212711	-0.013694
connexin_26	protein	Gjb2	non_specific	astrocyte		brain	brain					A.M. Jurga, M. Paleczna, J. Kadluczka, K.Z. Kuter, Beyond the GFAP-Astrocyte Protein Markers in the Brain, Biomolecules. 11 (2021) 10.3390/biom11091361.	0.0840979	-0.029647	-0.0542497	-0.0523495	-0.042182	0.178668	-0.0536303	0.0783173	-0.0523232	-0.0564708	-0.00813318	-0.0595546	-0.0465886	-0.0496906	-0.0535251	-0.0545824	-0.0493355	-0.0497546	-0.0447355	-0.0482102	-0.0576069	-0.0525148	-0.0516332	-0.0529533	-0.0505663	-0.0457815	0.129165	0.00405727	-0.0378127	-0.046645	-0.0574938	-0.0587883	1.46667	0.0108305	-0.052227	-0.0524277	-0.0628578
nestin	protein	Nes	non_specific	astrocyte	stem_progenitor_astrocyte	brain	brain	ependymal				A.M. Jurga, M. Paleczna, J. Kadluczka, K.Z. Kuter, Beyond the GFAP-Astrocyte Protein Markers in the Brain, Biomolecules. 11 (2021) 10.3390/biom11091361.	0.00314017	2.02834	-0.00927034	-0.0506272	-0.0527001	0.131816	-0.0546546	-0.042586	-0.0538284	-0.0509478	-0.046552	-0.0560733	-0.0489325	-0.0579209	-0.0411918	-0.0112622	-0.060805	-0.0448237	-0.0524044	-0.0465207	-0.0415742	-0.0492994	-0.0116878	-0.0485671	-0.0539887	-0.0324407	0.0670393	-0.0320324	-0.060805	-0.060805	-0.0531115	-0.060805	0.144264	1.75637	-0.060805	-0.060805	0.0142128
vimentin	protein	Vim	non_specific	astrocyte	stem_progenitor_astrocyte	brain	brain	tanycyte	fibroblast			A.M. Jurga, M. Paleczna, J. Kadluczka, K.Z. Kuter, Beyond the GFAP-Astrocyte Protein Markers in the Brain, Biomolecules. 11 (2021) 10.3390/biom11091361.	0.0404066	2.79806	-0.0450258	-0.0634535	-0.0657289	0.413415	-0.0607662	-0.0387542	-0.0737271	-0.0792419	-0.071405	-0.0718344	-0.0481905	-0.0781034	-0.0632741	-0.0463709	-0.0737805	-0.0515873	-0.0841237	-0.0844095	-0.0421803	-0.0793362	-0.0583265	-0.0215605	-0.0726198	-0.0511365	0.296281	0.101026	0.0591087	-0.0678457	-0.0313089	-0.0808152	0.74132	3.03822	-0.102797	-0.0507135	0.0477841
GLUT1	protein	Slc2a1	non_specific	astrocyte		brain	brain	microvascular_endoth	beta_tanycyte			A.M. Jurga, M. Paleczna, J. Kadluczka, K.Z. Kuter, Beyond the GFAP-Astrocyte Protein Markers in the Brain, Biomolecules. 11 (2021) 10.3390/biom11091361.	0.465641	5.38574	-0.146438	-0.187145	0.0152743	0.0257922	-0.0424599	0.508391	0.0358993	-0.176909	0.142123	-0.190073	-0.203463	-0.188173	-0.207056	-0.131718	-0.180426	-0.207105	-0.210371	-0.176623	-0.19593	-0.194316	-0.202117	-0.186755	-0.194276	-0.189302	0.20112	-0.151127	-0.208751	-0.117857	-0.0895722	-0.200206	-0.169676	4.64573	-0.181912	-0.182267	0.0488269
LDH5	mRNA	Ldha	non_specific	astrocyte		brain	brain					A.M. Jurga, M. Paleczna, J. Kadluczka, K.Z. Kuter, Beyond the GFAP-Astrocyte Protein Markers in the Brain, Biomolecules. 11 (2021) 10.3390/biom11091361.	0.15077	1.06843	0.0953234	0.00382251	-0.121717	0.194953	-0.110175	0.174298	-0.131558	-0.0645562	-0.143938	-0.00503548	0.159129	-0.0370459	0.0468294	0.0817414	-0.0663495	0.106926	0.0322892	-0.056853	0.00298817	-0.0397582	0.116274	0.271736	0.0160281	-0.043434	0.0233877	0.0571947	0.130844	-0.0731771	-0.112907	-0.0916643	0.162399	0.97491	-0.184488	-0.136241	0.52309
MCT1	protein	Slc16a1	non_specific	glial		brain	brain	alpha_tanycyte				A.M. Jurga, M. Paleczna, J. Kadluczka, K.Z. Kuter, Beyond the GFAP-Astrocyte Protein Markers in the Brain, Biomolecules. 11 (2021) 10.3390/biom11091361.	0.0665279	1.63835	-0.166126	-0.0650782	0.0689569	-0.0845526	0.0596036	0.0331609	0.0988654	-0.00432032	0.0478103	-0.0586473	-0.13802	-0.0739424	-0.148504	-0.163543	0.0301438	-0.099801	-0.114841	0.00559419	-0.105641	-0.0731739	-0.157783	-0.163446	-0.0622655	-0.0274438	0.331096	-0.0582309	-0.0890788	0.0290691	0.033062	-0.11433	-0.0876197	1.29393	-0.0889926	-0.070221	-0.159924
SLCO1C1	protein	Slco1c1	non_specific	astrocyte		brain	brain					A.M. Jurga, M. Paleczna, J. Kadluczka, K.Z. Kuter, Beyond the GFAP-Astrocyte Protein Markers in the Brain, Biomolecules. 11 (2021) 10.3390/biom11091361.	0.869913	5.66722	-0.186115	-0.184637	-0.182449	0.283031	-0.183188	1.03492	-0.185376	-0.187234	-0.188242	-0.186577	-0.196018	-0.180463	-0.187238	-0.170067	-0.190415	-0.185045	-0.187276	-0.189353	-0.191651	-0.183167	-0.197213	-0.19262	-0.186496	-0.191939	-0.161863	-0.125372	-0.182711	-0.172629	-0.190606	-0.162252	-0.0702157	4.82534	-0.17463	-0.177022	2.79041
SNAT5	protein	Slc38a5	non_specific	astrocyte		brain	brain	venous_capillary_endoth				A.M. Jurga, M. Paleczna, J. Kadluczka, K.Z. Kuter, Beyond the GFAP-Astrocyte Protein Markers in the Brain, Biomolecules. 11 (2021) 10.3390/biom11091361.	-0.0298452	1.66798	-0.0367803	-0.0316689	-0.0342636	-0.0222579	-0.034326	-0.0326986	-0.0356128	-0.0345075	-0.0319002	-0.030904	-0.0302756	-0.0367803	-0.0329985	-0.0367803	-0.0326139	-0.0282311	-0.0262294	-0.0325726	-0.0367803	-0.0273144	-0.0255848	-0.0311274	-0.0367803	-0.0367803	-0.0141409	-0.0367803	-0.0367803	-0.0367803	-0.0277943	-0.00873186	-0.0242812	1.34018	-0.0367803	-0.0367803	-0.0367803
Glycogen_synthase	protein	Gys1	non_specific	astrocyte		brain	brain					A.M. Jurga, M. Paleczna, J. Kadluczka, K.Z. Kuter, Beyond the GFAP-Astrocyte Protein Markers in the Brain, Biomolecules. 11 (2021) 10.3390/biom11091361.	0.153365	-0.361537	-0.35495	0.22581	-0.344336	-0.0960012	-0.348417	0.178887	-0.345538	0.391399	-0.339542	0.244255	0.0548039	0.19373	0.043113	-0.334299	0.382256	0.01235	0.0234037	0.292224	0.191639	0.277074	-0.13581	0.0443601	0.225976	0.364645	0.0280836	-0.074217	0.0312719	-0.258683	0.567949	0.0328387	-0.23077	-0.332731	0.58938	0.355964	0.366574
ezrin	protein	Ezr	non_specific	astrocyte		brain	brain					A.M. Jurga, M. Paleczna, J. Kadluczka, K.Z. Kuter, Beyond the GFAP-Astrocyte Protein Markers in the Brain, Biomolecules. 11 (2021) 10.3390/biom11091361.	0.175355	0.195553	-0.0537051	-0.072837	-0.10002	0.760475	-0.100915	0.0872458	-0.102627	-0.0735361	-0.10186	-0.0810166	-0.0431617	-0.0897663	-0.0757197	-0.0667044	-0.10272	-0.0514395	-0.0902847	-0.09898	-0.0914844	-0.0870359	-0.113624	0.0203259	-0.0836974	-0.0796767	0.525703	0.0116771	-0.0712272	-0.110298	-0.104115	-0.107074	0.114293	0.241915	-0.10434	-0.0315669	4.9704
PDK4	protein	Pdk4	non_specific	astrocyte		brain	brain					A.M. Jurga, M. Paleczna, J. Kadluczka, K.Z. Kuter, Beyond the GFAP-Astrocyte Protein Markers in the Brain, Biomolecules. 11 (2021) 10.3390/biom11091361.	0.166395	-0.0688632	-0.151894	-0.151274	0.179922	-0.0107825	0.0602827	0.17114	0.241049	-0.146309	0.434381	-0.156673	-0.16569	-0.141993	-0.158353	-0.153654	-0.143529	-0.163576	-0.16647	-0.153486	-0.153107	-0.164999	-0.154132	-0.10276	-0.110357	-0.166858	0.139907	-0.124229	-0.161085	-0.0639057	-0.167731	-0.165114	-0.08809	-0.0651333	-0.152059	-0.166828	0.643991
ECI2	protein	Eci2	non_specific	astrocyte		brain	brain					A.M. Jurga, M. Paleczna, J. Kadluczka, K.Z. Kuter, Beyond the GFAP-Astrocyte Protein Markers in the Brain, Biomolecules. 11 (2021) 10.3390/biom11091361.	0.499557	0.418477	-0.0324499	-0.0418463	-0.146862	0.130877	-0.1417	0.516976	-0.153042	-0.00391629	-0.156587	-0.0353826	-0.141265	-0.0558512	-0.134968	-0.0301926	-0.00407068	-0.0575667	-0.0881762	0.0140456	-0.0412091	-0.0480927	0.0162479	0.0266185	-0.0712366	-0.0356229	0.371867	-0.132064	-0.0952382	-0.0890022	0.0557779	-0.0689971	0.496697	0.327159	0.00789618	0.0456265	0.525844
HADHA	protein	Hadha	non_specific	astrocyte		brain	brain					A.M. Jurga, M. Paleczna, J. Kadluczka, K.Z. Kuter, Beyond the GFAP-Astrocyte Protein Markers in the Brain, Biomolecules. 11 (2021) 10.3390/biom11091361.	0.103411	-0.0575477	-0.0439148	0.0466831	-0.110299	0.0413522	-0.155789	0.124446	-0.0855024	0.0916474	-0.0248903	0.0167868	0.00484659	0.0169994	7.48843e-05	-0.037258	0.174497	0.0382701	0.0186828	0.117809	-0.0230258	0.048061	0.0200716	-0.00534065	0.0639973	0.0494258	-0.0360977	-0.201041	0.0820367	-0.0123248	0.218511	-0.0592575	0.00683585	-0.0434449	0.137823	0.0977874	0.382305
SERHL	protein	Serhl	non_specific	astrocyte		brain	brain					A.M. Jurga, M. Paleczna, J. Kadluczka, K.Z. Kuter, Beyond the GFAP-Astrocyte Protein Markers in the Brain, Biomolecules. 11 (2021) 10.3390/biom11091361.	0.304548	0.0555944	0.131088	-0.0206167	-0.12753	0.166645	-0.12604	0.313385	-0.135065	0.0240447	-0.130064	0.049469	-0.0924427	0.0291951	-0.0685152	0.119916	-0.100782	-0.0761185	-0.0623173	-0.0367143	0.0114028	-0.0390544	-0.0730669	0.0326367	-0.120446	-0.0830607	0.24943	-0.0806377	-0.115357	-0.127106	-0.110005	-0.0167611	0.104073	0.0596424	-0.0242464	0.024819	1.27433
FMN2	protein	Fmn2	non_specific	astrocyte		brain	brain					A.M. Jurga, M. Paleczna, J. Kadluczka, K.Z. Kuter, Beyond the GFAP-Astrocyte Protein Markers in the Brain, Biomolecules. 11 (2021) 10.3390/biom11091361.	1.009	-0.878582	-0.929589	0.379412	-0.830066	-0.112661	-0.813861	1.01012	-0.844813	0.476255	-0.860748	0.451609	0.380589	0.518078	0.303415	-0.872655	0.379668	0.361316	0.299555	0.312133	0.420878	0.370907	0.398931	0.264185	0.316958	0.408979	1.09698	-0.350999	0.336813	-0.688976	0.308515	0.26901	-0.856768	-0.788724	0.329925	0.579927	-0.778242
RSPH1	protein	Rsph1	non_specific	astrocyte		brain	brain	ependymal				A.M. Jurga, M. Paleczna, J. Kadluczka, K.Z. Kuter, Beyond the GFAP-Astrocyte Protein Markers in the Brain, Biomolecules. 11 (2021) 10.3390/biom11091361.	-0.070309	-0.031889	-0.102961	0.0453209	-0.102303	0.253669	-0.104456	-0.0821984	-0.0994959	0.00436323	-0.102875	0.0137094	0.12482	-0.0442009	0.154186	-0.097659	-0.0119459	0.164606	0.0777779	0.0332444	0.00980288	0.0282527	-0.108718	0.341774	-0.0210407	-0.00409983	-0.0170558	0.0132852	0.0665537	-0.113563	-0.0639199	-0.0679336	-0.0658171	-0.0548386	0.0590808	0.00488804	0.518629
synemin	protein	Synm	non_specific	astrocyte		brain	brain					A.M. Jurga, M. Paleczna, J. Kadluczka, K.Z. Kuter, Beyond the GFAP-Astrocyte Protein Markers in the Brain, Biomolecules. 11 (2021) 10.3390/biom11091361.	-0.08367	0.841366	-0.181566	-0.130308	0.201443	0.122884	0.0929583	-0.0890327	0.245083	-0.104064	0.459115	-0.139093	-0.154648	-0.125261	-0.16368	-0.179405	-0.096054	-0.157231	-0.139885	-0.140911	-0.119245	-0.132177	0.0180971	-0.148401	-0.0980576	-0.113786	-0.0399474	-0.0938014	-0.0777146	-0.0870823	-0.167476	-0.161049	0.16514	0.710038	-0.182102	-0.137042	0.1885
SYNPO2	protein	Synpo2	non_specific	astrocyte		brain	brain					A.M. Jurga, M. Paleczna, J. Kadluczka, K.Z. Kuter, Beyond the GFAP-Astrocyte Protein Markers in the Brain, Biomolecules. 11 (2021) 10.3390/biom11091361.	0.51284	0.190885	-0.225112	-0.000804697	-0.198361	0.151528	-0.216518	0.343551	-0.201961	-0.117742	-0.145531	-0.0677671	0.034988	-0.0387024	-0.041534	-0.215916	0.105351	-0.0604007	-0.00179896	-0.111315	0.124609	0.0641893	-0.217922	-0.015715	0.181617	0.140187	1.47865	-0.0708679	0.135106	-0.222799	-0.127825	-0.0993273	0.0683175	0.290166	1.39194	-0.0617213	-0.118059
NKX6_1	protein	Nkx6-1	non_specific	astrocyte		brain	brainstem			yes		A.M. Jurga, M. Paleczna, J. Kadluczka, K.Z. Kuter, Beyond the GFAP-Astrocyte Protein Markers in the Brain, Biomolecules. 11 (2021) 10.3390/biom11091361.	0.0339901	-0.0343307	-0.0466174	-0.0274219	-0.0439858	0.0490656	-0.0441576	0.04494	-0.0439016	-0.0185992	-0.0427714	-0.0340554	-0.0346317	-0.0474057	-0.0472128	-0.0467836	0.0240005	-0.0423551	-0.0509164	-0.0155529	-0.0377685	-0.034317	-0.0453107	-0.000749857	-0.0441068	-0.043783	-0.0358022	-0.0413349	0.0183733	-0.0509164	-0.0448509	-0.0402692	0.0367006	0.0376937	-0.0373889	-0.0509164	-0.0509164
Glycogen_phosphorylase	protein	Pygl	non_specific	astrocyte		brain	brain					A.M. Jurga, M. Paleczna, J. Kadluczka, K.Z. Kuter, Beyond the GFAP-Astrocyte Protein Markers in the Brain, Biomolecules. 11 (2021) 10.3390/biom11091361.	0.158204	-0.0475152	0.0813676	0.00846632	-0.102422	0.0197402	-0.104344	0.145994	-0.104801	0.0287242	-0.0997515	0.0120044	-0.0317142	-0.0264086	0.0581884	0.0771459	-0.0163838	-0.00334901	-0.0252311	0.048543	-0.00791226	0.0076772	-0.0810323	0.150111	-0.0151908	-0.042222	0.229427	-0.0538831	-0.0289048	-0.099399	-0.048755	-0.0445322	-0.0120542	-0.0538885	-0.0614855	-0.0086119	0.00501678
LXR	protein	Nr1h3	non_specific	astrocyte		brain	brain					A.M. Jurga, M. Paleczna, J. Kadluczka, K.Z. Kuter, Beyond the GFAP-Astrocyte Protein Markers in the Brain, Biomolecules. 11 (2021) 10.3390/biom11091361.	0.0809311	0.151052	-0.0708489	0.0207345	-0.104698	0.126628	-0.10494	0.0696032	-0.102431	0.0422715	-0.11033	0.0536036	-0.00356376	0.0417443	-0.0249813	-0.0613174	-0.0237181	-0.0452148	-0.0477159	0.011257	0.0349522	0.0449351	0.00287969	-0.0324385	-0.0554831	0.00665828	0.133931	-0.0515808	-0.0167828	-0.10041	0.236668	0.0529088	0.615601	0.119759	0.161244	0.0794402	-0.0253399
NFIA	protein	Nfia	non_specific	glial		brain	brain					A.M. Jurga, M. Paleczna, J. Kadluczka, K.Z. Kuter, Beyond the GFAP-Astrocyte Protein Markers in the Brain, Biomolecules. 11 (2021) 10.3390/biom11091361.	1.29411	-0.12086	0.450103	-0.629509	0.345783	0.558144	0.443159	1.29838	0.443088	-0.447771	-0.0617174	-0.553441	-0.92437	-0.531928	-0.962359	0.446657	-0.533768	-0.960431	-0.765243	-0.737542	-0.619509	-0.779534	0.669276	-0.976886	-0.812799	-0.434535	1.27086	-0.666599	-0.061709	0.229409	-0.132203	-0.747391	0.815528	-0.0733482	-0.64053	-0.578709	0.737147
NFIB	protein	Nfib	non_specific	astrocyte		brain	brain			yes	adult	A.M. Jurga, M. Paleczna, J. Kadluczka, K.Z. Kuter, Beyond the GFAP-Astrocyte Protein Markers in the Brain, Biomolecules. 11 (2021) 10.3390/biom11091361.	1.20056	0.443354	-0.733086	-0.424928	0.171268	0.431474	-0.0064941	1.21498	0.277729	-0.678897	0.516131	-0.678066	-0.568728	-0.565593	-0.742288	-0.706634	-0.101352	-0.560731	-0.0788565	-0.717843	-0.473843	-0.701536	0.782335	-0.76094	0.506991	-0.0200784	1.08469	-0.421367	1.10965	-0.0101808	1.06558	-0.142741	0.423586	0.353327	-0.686206	0.691383	0.680965
HMGCS2	protein	Hmgcs2	non_specific	astrocyte		brain	brain					A.M. Jurga, M. Paleczna, J. Kadluczka, K.Z. Kuter, Beyond the GFAP-Astrocyte Protein Markers in the Brain, Biomolecules. 11 (2021) 10.3390/biom11091361.	0.0314072	1.57661	-0.0610729	-0.0557311	-0.0533017	0.215522	-0.0555947	-0.0326071	-0.0550092	-0.056784	-0.0490124	-0.0542059	-0.0538883	-0.0566533	-0.0576928	-0.0612393	-0.0586297	-0.059604	-0.0571354	-0.0576195	-0.0627873	-0.0639168	-0.0613376	-0.0568791	-0.0455918	-0.065378	0.0166628	0.0933382	-0.0537791	-0.0593226	-0.0437903	-0.0581652	0.935954	1.35853	-0.065378	-0.0572143	0.0693495
radixin	protein	Rdx	non_specific	astrocyte		brain	brain					A.M. Jurga, M. Paleczna, J. Kadluczka, K.Z. Kuter, Beyond the GFAP-Astrocyte Protein Markers in the Brain, Biomolecules. 11 (2021) 10.3390/biom11091361.	-0.225065	0.272589	-0.209077	-0.0357854	0.163001	-0.101489	0.115473	-0.242516	0.215612	-0.00939075	0.192935	-0.00123766	-0.0764966	-0.103585	-0.0845183	-0.205016	-0.0289105	-0.0156138	-0.0610469	0.0186742	-0.0175157	-0.0574612	-0.131674	0.0149939	-0.057338	-0.0382382	-0.147597	-0.316064	0.0613212	0.224342	-0.0898165	-0.0981663	-0.0435868	0.234921	-0.0374167	-0.0620291	-0.11132
HMGCR	protein	Hmgcr	non_specific	astrocyte		brain	brain					A.M. Jurga, M. Paleczna, J. Kadluczka, K.Z. Kuter, Beyond the GFAP-Astrocyte Protein Markers in the Brain, Biomolecules. 11 (2021) 10.3390/biom11091361.	0.0542634	-0.302421	-0.3612	0.169099	-0.210086	-0.176875	-0.274047	0.079733	-0.190209	0.204453	-0.0728468	0.144461	0.117383	-0.0539547	0.269647	-0.344319	0.330527	0.175039	0.0675578	0.364988	0.12065	0.0870573	-0.0625503	0.35618	0.294701	0.180062	-0.0734446	-0.141589	0.236036	-0.0175081	0.113201	-0.0653598	-0.296859	-0.309952	-0.0162866	0.196763	-0.23108
SCAP	protein	Scap	non_specific	glial		brain	brain					A.M. Jurga, M. Paleczna, J. Kadluczka, K.Z. Kuter, Beyond the GFAP-Astrocyte Protein Markers in the Brain, Biomolecules. 11 (2021) 10.3390/biom11091361.	-0.0859327	-0.0773508	-0.125412	0.0401569	-0.00408904	-0.0820002	-0.0632741	-0.0852117	0.0243505	0.00703151	0.114178	0.0756664	0.028462	0.0550042	0.095024	-0.118457	0.0554263	0.0500184	0.138941	0.0360699	0.0783866	0.0458931	-0.0641861	0.0544457	-0.020035	0.0931016	-0.0858973	-0.0825949	-0.00679965	-0.0465133	-0.0133337	-0.025141	-0.0629805	-0.093989	-0.0676544	0.00519275	-0.081995
MCT4	protein	Slc16a3	non_specific	astrocyte		brain	brain					A.M. Jurga, M. Paleczna, J. Kadluczka, K.Z. Kuter, Beyond the GFAP-Astrocyte Protein Markers in the Brain, Biomolecules. 11 (2021) 10.3390/biom11091361.	-0.0512021	-0.0368311	0.171761	-0.00675638	-0.0250582	-0.0313871	-0.0336085	-0.0500311	-0.0182425	-0.00161952	-0.0205958	-0.00692338	-0.0035418	-0.054588	-0.019025	0.160375	-0.0482861	0.00825336	-0.0537115	0.045846	-0.00681775	-0.0498863	-0.0570368	0.121578	0.0181554	-0.00430655	-0.0640135	-0.0867656	-0.0190694	0.043889	0.00420046	-0.0480247	-0.0365202	-0.0368499	-0.0414578	-0.0164592	-0.0438524
ECI1	protein	Eci1	non_specific	astrocyte		brain	brain					A.M. Jurga, M. Paleczna, J. Kadluczka, K.Z. Kuter, Beyond the GFAP-Astrocyte Protein Markers in the Brain, Biomolecules. 11 (2021) 10.3390/biom11091361.	0.370091	-0.0254708	-0.070648	-0.062776	-0.040461	0.033407	-0.0555449	0.380957	-0.0199728	-0.0439335	-0.0345887	-0.0748362	-0.123939	-0.0809941	-0.134834	-0.0757299	0.00674983	-0.14686	-0.12792	0.0419185	-0.0567636	-0.0369206	-0.0185022	-0.0967191	-0.0304199	-0.0446481	0.335216	-0.114555	-0.117743	0.00538439	0.0702194	-0.0373227	0.0168369	-0.00503721	0.0742026	-0.054396	0.355662
CNN1	protein	Cnn1	non_specific	astrocyte		brain	brain	smooth_muscle_vessels				A.M. Jurga, M. Paleczna, J. Kadluczka, K.Z. Kuter, Beyond the GFAP-Astrocyte Protein Markers in the Brain, Biomolecules. 11 (2021) 10.3390/biom11091361.	-0.0376198	-0.0314531	-0.048034	0.00356494	-0.0448847	-0.0298607	-0.048034	-0.0408831	-0.0433589	0.00701301	-0.0382629	0.00822141	-0.00600072	0.00253478	-0.00260208	-0.0439024	-0.0105002	0.0161101	0.00303255	0.00811696	0.0165286	0.0158651	-0.04243	0.00613348	-0.0212301	0.0367837	-0.048034	-0.048034	-0.0280777	-0.038026	0.0151369	-0.0276708	-0.0355209	0.0278957	0.019584	0.0328161	-0.0329921
PDLIM7	protein	Pdlim7	non_specific	astrocyte		brain	brain					A.M. Jurga, M. Paleczna, J. Kadluczka, K.Z. Kuter, Beyond the GFAP-Astrocyte Protein Markers in the Brain, Biomolecules. 11 (2021) 10.3390/biom11091361.	-0.346856	-0.149514	-0.421311	0.410648	-0.418616	-0.212499	-0.418064	-0.367254	-0.418804	0.501519	-0.415862	0.568347	0.26179	0.482765	0.472527	-0.387617	0.240645	0.419983	0.459351	0.322071	0.451718	0.387141	-0.410999	0.347246	0.144438	0.296258	-0.285152	0.15222	0.525884	-0.424658	0.294894	0.363768	0.0766259	-0.153645	0.192966	0.28083	-0.186574
ABCA7	protein	Abca7	non_specific	astrocyte		brain	brain					A.M. Jurga, M. Paleczna, J. Kadluczka, K.Z. Kuter, Beyond the GFAP-Astrocyte Protein Markers in the Brain, Biomolecules. 11 (2021) 10.3390/biom11091361.	-0.19705	-0.107343	-0.136696	0.223794	-0.236395	-0.0878028	-0.262225	-0.193083	-0.229498	0.442931	-0.176887	0.166308	-0.0775911	0.24646	-0.0893111	-0.119862	0.376635	-0.186702	-0.166806	0.207971	0.120872	0.370854	-0.0152655	0.268952	-0.0152431	0.386411	-0.261171	-0.021787	-0.0604154	-0.179442	1.0787	0.164864	-0.261101	-0.12775	0.875144	0.638703	-0.015415
CPT1a	protein	Cpt1a	non_specific	astrocyte		brain	brain					A.M. Jurga, M. Paleczna, J. Kadluczka, K.Z. Kuter, Beyond the GFAP-Astrocyte Protein Markers in the Brain, Biomolecules. 11 (2021) 10.3390/biom11091361.	0.653516	0.775526	-0.036239	-0.108857	-0.128184	0.241519	-0.133158	0.713033	-0.11845	-0.0569323	-0.136246	-0.147894	-0.19504	-0.187767	-0.179081	-0.0390947	-0.132237	-0.202687	-0.167766	-0.14157	-0.174903	-0.113312	0.153226	0.0261527	-0.114745	-0.110899	0.253451	-0.0254442	-0.158142	0.0113234	-0.0249355	-0.154073	0.244421	0.663198	0.374764	-0.12867	0.989691
CPT2	protein	Cpt2	non_specific	astrocyte		brain	brain					A.M. Jurga, M. Paleczna, J. Kadluczka, K.Z. Kuter, Beyond the GFAP-Astrocyte Protein Markers in the Brain, Biomolecules. 11 (2021) 10.3390/biom11091361.	0.0916674	0.150613	0.0652018	-0.0762926	0.0528082	0.0851245	0.0088287	0.0948645	0.0522341	-0.0756766	0.173574	-0.0811833	-0.0651972	-0.101552	-0.0911451	0.0587942	-0.0711691	-0.0811598	-0.0994623	-0.0706708	-0.0888556	-0.0873262	-0.0144064	-0.00166701	-0.0573683	-0.0645845	0.0459823	-0.0596854	-0.0873841	-0.00517112	-0.0365797	-0.0943998	0.170584	0.14141	-0.0564599	-0.0766598	0.298642
GPAT3	protein	Gpat3	non_specific	astrocyte		brain	brain					A.M. Jurga, M. Paleczna, J. Kadluczka, K.Z. Kuter, Beyond the GFAP-Astrocyte Protein Markers in the Brain, Biomolecules. 11 (2021) 10.3390/biom11091361.	-0.220426	-0.212528	-0.23652	0.240015	-0.233187	-0.147846	-0.231209	-0.228036	-0.230743	0.469673	-0.243479	0.306792	-0.0955034	0.498622	-0.0233642	-0.225742	0.157301	0.00373163	0.0572153	0.102434	0.301373	0.384306	-0.193925	-0.0952197	0.00509615	0.247319	-0.18153	0.0259	-0.0172139	-0.217009	0.666732	0.152813	-0.140954	-0.206767	0.750208	0.744048	-0.108533
FBP	protein	Fbp1	non_specific	astrocyte		brain	brain					A.M. Jurga, M. Paleczna, J. Kadluczka, K.Z. Kuter, Beyond the GFAP-Astrocyte Protein Markers in the Brain, Biomolecules. 11 (2021) 10.3390/biom11091361.	-0.0313887	-0.0208938	-0.0374573	-0.00765938	-0.032109	-0.0120414	-0.0319347	-0.0333753	-0.0339546	-0.00695576	-0.03095	-0.00652624	-0.0249622	-0.0304454	0.00414487	-0.0374573	-0.0341336	-0.0160828	-0.0185987	-0.0107306	-0.0146829	-0.0264633	-0.00386844	0.113095	-0.0306568	-0.0374573	-0.0223633	0.0486601	0.0323165	-0.00746485	0.00106165	-0.0268244	-0.0374573	-0.0248156	-0.0104385	-0.0374573	-0.0374573
connexin_30	protein	Gjb6	non_specific	astrocyte	mature_astrocyte	brain	brain					A.M. Jurga, M. Paleczna, J. Kadluczka, K.Z. Kuter, Beyond the GFAP-Astrocyte Protein Markers in the Brain, Biomolecules. 11 (2021) 10.3390/biom11091361.	1.77564	-0.172588	-0.244246	-0.259007	-0.236231	0.00554477	-0.233705	1.89292	-0.240346	-0.262506	-0.241928	-0.261036	-0.264279	-0.262487	-0.261531	-0.222486	-0.254764	-0.255278	-0.257904	-0.267285	-0.257227	-0.263951	-0.239158	-0.249469	-0.263712	-0.255538	1.26102	-0.130772	-0.242798	-0.238192	-0.267804	-0.268629	1.04236	-0.150599	-0.259754	-0.276132	-0.223258
FABP7	protein	Fabp7	non_specific	glial	protoplasmic_astrocytes	brain	brain	OPC_betatanycyte				A.M. Jurga, M. Paleczna, J. Kadluczka, K.Z. Kuter, Beyond the GFAP-Astrocyte Protein Markers in the Brain, Biomolecules. 11 (2021) 10.3390/biom11091361.	0.499398	-0.12116	-0.0820381	-0.101554	-0.0716218	0.250825	-0.0712554	0.44452	-0.0664992	-0.0987523	-0.0773879	-0.111946	-0.104299	-0.0991939	-0.0984286	-0.0698435	-0.0893738	-0.0976009	-0.105234	-0.105997	-0.11965	-0.103755	0.750989	-0.104766	-0.0903889	-0.103612	0.868789	0.034668	-0.11028	-0.0119233	-0.0964665	-0.0937241	-0.0604237	-0.0745537	-0.107689	-0.11847	-0.107526
GC_2	protein	Slc25a18	non_specific	astrocyte		brain	brain					A.M. Jurga, M. Paleczna, J. Kadluczka, K.Z. Kuter, Beyond the GFAP-Astrocyte Protein Markers in the Brain, Biomolecules. 11 (2021) 10.3390/biom11091361.	1.55292	-0.193709	-0.247842	-0.216265	-0.218162	0.00208929	-0.22264	1.6041	-0.213815	-0.223819	-0.214162	-0.209685	-0.215914	-0.212068	-0.22954	-0.238381	-0.226348	-0.226932	-0.223333	-0.230475	-0.205412	-0.228225	-0.0861053	-0.217333	-0.214597	-0.184708	1.26801	-0.177278	-0.226429	-0.206299	-0.20455	-0.207757	-0.188833	-0.141092	-0.210385	-0.241239	-0.127084
GLDC	protein	Gldc	non_specific	astrocyte		brain	brain					A.M. Jurga, M. Paleczna, J. Kadluczka, K.Z. Kuter, Beyond the GFAP-Astrocyte Protein Markers in the Brain, Biomolecules. 11 (2021) 10.3390/biom11091361.	0.498612	-0.107952	-0.124615	-0.0562832	-0.121102	0.141895	-0.122129	0.51457	-0.125661	-0.0687859	-0.119697	-0.0710106	-0.0578045	-0.0733659	-0.0266784	-0.122095	-0.0683842	-0.0407837	-0.038069	-0.0957846	-0.074958	-0.0755251	0.338639	-0.0286348	0.0619014	-0.0818977	0.432659	-0.0492814	0.158524	-0.0328989	-0.101765	-0.105331	-0.114075	-0.088151	-0.089138	-0.0304456	0.1692
GPT2	protein	Gpt2	non_specific	astrocyte		brain	brain					A.M. Jurga, M. Paleczna, J. Kadluczka, K.Z. Kuter, Beyond the GFAP-Astrocyte Protein Markers in the Brain, Biomolecules. 11 (2021) 10.3390/biom11091361.	0.550326	-0.376517	-0.333498	-0.0849172	-0.0890228	0.277476	-0.0599946	0.564908	-0.0558246	-0.039524	-0.225479	-0.0592244	-0.137842	-0.00429843	-0.110409	-0.321638	-0.0714568	-0.112281	-0.0907908	-0.0971086	-0.0970306	-0.116004	1.1801	-0.175003	-0.141597	-0.0744369	0.566191	-0.20524	-0.11701	0.106558	0.00509865	-0.175405	-0.174216	-0.363665	-0.10753	0.0131674	-0.336196
Gli1	protein	Gli1	non_specific	Bergmann_glia		brain	cerebellum			yes		A.M. Jurga, M. Paleczna, J. Kadluczka, K.Z. Kuter, Beyond the GFAP-Astrocyte Protein Markers in the Brain, Biomolecules. 11 (2021) 10.3390/biom11091361.	1.02244	-0.153868	-0.147715	-0.142803	-0.143226	-0.00863786	-0.141822	1.07196	-0.148476	-0.143596	-0.144965	-0.146205	-0.150475	-0.14943	-0.14839	-0.138334	-0.135825	-0.144348	-0.144179	-0.139716	-0.14238	-0.142458	-0.15027	-0.136845	-0.127153	-0.14863	0.830269	-0.139943	-0.126166	-0.1355	-0.149881	-0.151744	0.452716	-0.143399	-0.143746	-0.153868	-0.103487
Phox2b	mRNA	Phox2b	non_specific	neuron	preganglionic_parasympatetic	brain	brainstem	cholinergic		yes		V. Dyachuk, A. Furlan, M.K. Shahidi, M. Giovenco, N. Kaukua, C. Konstantinidou, et al., Parasympathetic neurons originate from nerve-associated peripheral glial progenitors, Science. 345 (2014) 82-7. 10.1126/science.1253281.	-0.0832541	-0.119095	-0.0744233	0.0895031	-0.0978319	-0.0733375	-0.0966337	-0.079027	-0.0999401	-0.0955573	-0.0961021	0.0602103	-0.0972904	-0.104271	1.04048	-0.0695486	-0.108299	-0.107041	0.299929	-0.0937866	-0.0891233	-0.028963	-0.0664772	1.51458	-0.108567	-0.0397868	-0.0988125	-0.0417175	-0.02747	-0.0978014	-0.120749	-0.116286	-0.0852232	-0.109848	-0.0992374	-0.122076	-0.0889062
Ascl1	mRNA	Ascl1	non_specific	neuron	preganglionic_parasympatetic	brain	brainstem	cholinergic	astrocyte	yes		V. Dyachuk, A. Furlan, M.K. Shahidi, M. Giovenco, N. Kaukua, C. Konstantinidou, et al., Parasympathetic neurons originate from nerve-associated peripheral glial progenitors, Science. 345 (2014) 82-7. 10.1126/science.1253281.	-0.0663447	-0.0443102	-0.0732592	-0.00226983	-0.0654086	0.274536	-0.0646322	-0.0653813	-0.0681997	0.00733227	-0.0645601	-0.0302074	-0.0307486	0.0515358	-0.0314124	-0.0670159	0.0423862	-0.0269769	-0.0117738	-0.0220196	-0.0198019	-0.0020952	0.920612	-0.0187038	0.0898613	-0.0300631	-0.0699924	-0.0248331	0.0270467	-0.0373831	-0.0585493	0.0164168	-0.0775695	-0.0521852	0.173674	0.00966717	-0.0775695
[truncated: 17 more columns]
