# Supplementary material for: A unified rodent atlas reveals the cellular complexity and evolutionary divergence of the dorsal vagal complex
Source: eLife. 2025 Oct 7;14:RP106217. doi: 10.7554/eLife.106217 (PMC12503491; doi:10.7554/eLife.106217)
Supplement: Supplementary file 3. — Rat neurons were subset and reprocessed before labeling at layers 2 and 3 of granularity. We used neuronal class gene expression markers to identify clusters at resolution 2.0 that belonged to each neuronal cell class. These cell classes were further subclustered, and markers from Supplementary file 6 and UMAP projections were used to label each population in the dataset. [file elife-106217-supp3.xlsx]

## Sheet: S3
Identity	Upregulated genes (markers)	Downregulated genes	Peculiarities
Preganglionic class	Slit3 Isl1 Chat
Preganglionic1 (Cluster 31)	Chat Prph Tbx20 Slit3 Sncg Stx1a Cpne7...		This cluster is almost identical to the murine preganglionic1 group, but a big difference is that they seem to lack expression of Phox2b. Cells in the cluster express high Slit3 and Chat. Other differences to the murine preganglionic1 include specific marker expression: Sncg, Stx1a, Cpne7
Preganglionic2 (Cluster 30)	Chat Slit3 Isl1 Hspb1 Lcp1...		The pattern of Slit3 expression mimics the murine preganglionic-calss neurons: It is higher than in the preganglionic1 cell identity.
Corelautus-class
Cmss1	Apoe Atp1a2 Agt Itih3	Clvs2 Lrrfip2...	Although they seem to not express Cmss1, when we mapped the top marker genes for this population in the rat, most of them were upregulated in a group in the Cmss1 murine population. In addition, some genes downregulated in the Cmss1 murine neurons, are also downregulated in this rat cluster.
Gabra6	Gabra6 Chn2 Als2 Etv1 Camk4...		Most of the markers are shared with the Gabra6 neurons in mice.
cell_compages	Tubb3 Sncg Nefm		A subset of the Cmss1 cluster is similar to this, but less and some of the markers are specific of the rat cluster.
immunity-related Is a class itself	Cst3 Inpp5d Csf1r		It has high Inpp5d shown to regulate inflammasome activation in human microglia. Cst3 is related to the recruitment of macrophages in cancer. Cst3 and Inpp5d expression are related to neurodegenerative diseases and it is glucocorticoid responsive as well. Csf1r and Inpp5d are almost not expressed by murine neurons.
Pdgfra. Is a class itself	Arhgap31 Pdgfra Bcas1 Itga9		It has high Arhgap31, related to vascular cells and cell signaling. Pdgfra is a receptor for the platelet-derived growth factor. Itga9 is related to adhesion in endothelial cells.
Golli-related. Is a class itself	Mog Plp1 Qk Tf Mag Mbp...		Much bigger cluster in rat than in mice, but very consistent marker expression to the murine neurons.
Mixed neurons 1 Is a class itself (Lrmda class)	Cgnl1 Sv2c Aff1 Flt3...	Camk2a Trpm3 Ebf1 Fnbp1l...	The Lrmda marker seem to be not present in this rat cluster, but many of the other mixed_neurons1 markers of the murine data are found upregulated (e.g. Col19a1, Sv2c). Also, the markers of the rat data are also upregulated in the mixed_neurons1 of the murine data (e.g. Cgnl1, Aff1). This group also follows the downregulation patterns of the mixed_neurons1 in mice.
Magnaclass 1	Gad2 Gad1 Pax2 Slc6a5 Slc32a1	Nrn1 Slc17a6 Cacna2d1 Tmem163
NFI	Nfib Nfia Nfix Chd7 Tcf4 Dach1...		It is enriched in the chromatin associated Chd7 and all Nfia, Nfib and Nfix just like the NFI neurons in mice. It also has very few expression of Nfic.
Zeb2-Kcnmb2	Nfib Bmper Ebf3 Sst Dach1...		A peculiarity is that in the rat, these cells have the highest expression of Sst, but not in mice. Also, despite most marker genes are shared between rat and mice, Kcnmb2 seems to not be upregulated in the rat cells.
Zeb2-Spon1	Zeb2 Tcf4 Spon1 Dscaml1 Arhgap15 Rftn1...
Zeb2-Zfp831	Zeb2 Zfp831 Pde1a Rftn1 Dscaml1 Adra1a...		The dopamine receptor D2 (Drd2) is upregulated in the rat data.
Mixed neurons 2	Gad2 Slc6a5 Plch1 Slc30a3...	Ebf1 Dach1...	Just like the murine mixed neurons2, this is a very difficult population to delineate because marker genes are not exclusive.
Mixed neurons 6	Grin2c Dach1 Myo16...		This is a new identity in the rat data
Sall3-class	Sall3 Gbx1 Rab38 Pdzd2 Mgll Cacna2d3	Gabra1
Sall3-Nox4	Nox4 Gpc3 Enpp2 Gulp1 Adamts3...
Sall3-Cdh3	Cdh3 Nfib Prkcq Zeb2 Asic4...		A subset expresses high Gucy2e
Sall3-Rorb	Rorb Arpp21 Nr2f2 Il1rap...
Magnaclass 2	Slc17a6 Cacna2d1 Adcyap1 Tmem163	Gad2 Gad1 Pax2 Slc6a5 Slc32a1 Nrn1
COE-Atp10a	Atp10a Sntb1 Dhrs3 Kcng2 Cbln2 Adarb2 Ebf3 Ebf2...
COE-Pamr1	Ebf3 Ebf2 Lmx1b Igsf11...		Although Pamr1 expression seem to be less in the rat, the are many shared markers.
COE-Pdyn	Pdyn Lmx1b Gfra1 Nfix...		It is not clear if this is a subset of the COE-Pamr1 or the COE-Atp10a murine cells, this is why the new identity was created for the rat data.
Vglut1	Slc17a7 (VGLUT1) Ush2a Sdc1 Lama1 Neurod6 Fam163a...		Ush2a and Sdc1 are not markers in the murine data.
Lnc1	Nr4a2 Aldh1a2 Pdyn Tac1 Pomc...		It has very few gene expression markers in the rat dataset, but very specific though. It shows hight similarity with a subset of the murine Lnc1 and therefore named like them, as seem to reflect a subgroup of cells. Curiously, express Pomc in very few cells but high
Lmo3	Grin2c Slc5a7 Fam163a
Mixed neurons 3	Tmem163 Slc17a6 Arhgap24...	Cacna2d3 Egfem1 Camk2a...
Mixed neurons 5	Shox2 Lmx1b		Seem to be a very distinct group of mixed neurons and has very few gene expression markers.
Monoamine-class	Ddc Nrp2 Rnf220 Zfhx3
M0 (monoaminergic 0)	Ddc Chrna3 Chrna5 Parm1 Bace2 Sh3bp4...		Chrna3 and Chrna5 are also expressed within the monoaminergic-class in the M0 identity of the mice, showing the same expression pattern, where Chrna5 is expressed by fewer cells but almost exclusively and at high levels. Other markers are also shared. It follows exactly the same monoamine patterns as the murine M0: Contains most cells expressing combinations of Ddc and Th, but it practically lack…
M1 (monoaminergic 1)	Ddc Dbh Th Cngb1 Tfap2b Gch1...		It follows exactly the same monoamine patterns as the murine M1: Contains most cells expressing combinations of Ddc, Th, Tph2 and VMAT2. It also expresses Dbh. In the rat Tph2 is mostly in the M0 group.
M2 (monoaminergic 2)	Gal Arhgap28 Rprm Rarb...		It has the similar monoamine patterns as the murine M2: Contains some cells expressing Ddc, VMAT2, very little Th, but no Dbh or Tph2. The amount of cells is very small but this suggests that those release trace amines and are therefore monoamine-modulators.
M3 (monoaminergic 3)	Lmx1b Baiap3 Tfap2b...	Adarb2 Cacna2d3 Syt2...	It has the similar monoamine patterns as the murine M2: It's the largest monoaminergic group. It contains some cells expressing combinations of Ddc, Th, VMAT2, but not Dbh and Tph2. This suggests that these cells release trace amines and are therefore monoamine-modulators. It has less clear differentially expressed genes than the other two members of the class.
M4 (monoaminergic 4)	Shox2 Irx1 C1ql3 Lmx1b...		It is not clear if this is a subset of the M3 or the M2 murine cells, this is why the new identity was created for the rat data.
M5 (monoaminergic 5)	Tfap2b Fgd5 Tph2 Zbbx Cpne8...		It is not clear if this is a subset of the M3 or the M0 murine cells, this is why the new identity was created for the rat data.
M-Sema	Ecel1 Rprm Sema3a...		It is not clear if this is a subset of the M0, M1 or M2 murine cells, this is why the new identity was created for the rat data.
Lhx2-class	Lhx2 Pvalb
Rorb-Maf	Maf Rorb Ebf3 Ebf1 Hpse Atp6ap1l Zfp93...
Tpbg	Tpbg Arpp21 Tshz3 Zbtb7c...		Although marker expression is not exactly the same, this fits very well with the Tpbg murine identity.
Lhx2_Slit3	Fign Kitlg Nr2f2 Lhx9		It is not clear if this is a subset of the Tpbg or the paradoxic murine cells, this is why the new identity was created for the rat data. Within the class is the only group consistently expressing Slit3.
Paradoxic	Mylk Egfr Nr2f2 Cdh1 Pde5a...
