# Supplementary material for: A unified rodent atlas reveals the cellular complexity and evolutionary divergence of the dorsal vagal complex
Source: eLife. 2025 Oct 7;14:RP106217. doi: 10.7554/eLife.106217 (PMC12503491; doi:10.7554/eLife.106217)
Supplement: Supplementary file 4. — Breakdown of the cell identities (except neurons at layer-3 of cellular resolution) we established and corroborated using a combination of markers surveyed in Supplementary file 11 and additional markers established using the FindConservedMarkers function from Seurat v5 (Hao et al., 2024) package, indicating a cell state derived from the literature. For example, ‘s_fibroblasts’ were named after finding high expression of Stk39, a stress-related marker (Kasai et al., 2022). [file elife-106217-supp4.xlsx]

## Sheet: S4 (2)
population_identity	cells_description	identity_layer	upregulated_markers_from_literature	downregulated_markers_from_literature	Notes	Specific references
	oligodendrocyte lineage		Bcas1		Includes oligodendrocytes and OPCs
	mature oligodendrocyte		Mog, Mobp	Fyn, Tns3, Gpr17	Includes myelinating_intermediate_OLs and myelinating_OLs
oligodendrocyte	oligodendrocyte	2	Mbp, Cldn11		Includes premyelinating_OLs, myelinating_intermediate_OLs and myelinating_OLs
premyelinating_OL	premyelinating oligodendrocyte	3	Fyn, Tns3, Gpr17			N. Burnashev, A. Khodorova, P. Jonas, P.J. Helm, W. Wisden, H. Monyer, et al., Calcium-Permeable AMPA-Kainate Receptors in Fusiform Cerebellar Glial Cells, Science. 256 (1992) 1566-70. http://dx.doi.org/10.1126/science.1317970.
myelinating_intermediate_OL	myelinating intermediate oligodendrocyte	3	Opalin, Synpr, Kit, Pakap	Anln		N. Burnashev, A. Khodorova, P. Jonas, P.J. Helm, W. Wisden, H. Monyer, et al., Calcium-Permeable AMPA-Kainate Receptors in Fusiform Cerebellar Glial Cells, Science. 256 (1992) 1566-70. http://dx.doi.org/10.1126/science.1317970.
myelinating_OL	myelinating oligodendrocyte	3	Anln, Carns1	Opalin, Synpr, Kit, Pakap		[1] L. Gautron, J.K. Elmquist, K.W. Williams, Neural control of energy balance: translating circuits to therapies, Cell. 161 (2015) 133-45. 10.1016/j.cell.2015.02.023. [2] M.Q. Ludwig, W. Cheng, D. Gordian, J. Lee, S.J. Paulsen, S.N. Hansen, et al., A genetic map of the mouse dorsal vagal complex and its role in obesity, Nat Metab. 3 (2021) 530-45. 10.1038/s42255-021-00363-1.
OPC	oligodendrocyte precursor cell	3	Pdgfra, Vcan, Cspg5, Cspg4
APNTS_endothelial	endothelial cell of the AP/NTS (DVC)	3	Tek, Slc2a1	Abcc9, Kcnj8, Atp13a5, Talgn, Myh11, Myl9		N. Burnashev, A. Khodorova, P. Jonas, P.J. Helm, W. Wisden, H. Monyer, et al., Calcium-Permeable AMPA-Kainate Receptors in Fusiform Cerebellar Glial Cells, Science. 256 (1992) 1566-70. http://dx.doi.org/10.1126/science.1317970.
perycyte	perycyte	3	Abcc9, Kcnj8, Atp13a5
smooth_muscle	smooth muscle cell	3	Talgn, Myh11, Myl9
astrocyte	astrocyte	2	Fgfr3, Slc4a4, Slc7a10, Slc1a2, Gjb6		Includes APNTS_astrocytes, Ca_permeable astrocytes and myelin_related_astrocytes
APNTS_astrocyte	astrocyte of the AP/NTS (DVC)	3	Gria2
Ca_permeable astrocyte	ionic calcium-permeable astrocyte	3	Gfap, Kcnj3	Gria2
myelin_related_astrocyte	astrocyte expressing myelin-genes	3	Mobp
fibroblast	fibroblast	2	Dcn, Gjb2, Col13a1		Includes perivascular and stress-related fibroblasts
p_fibroblast	perivascular fibroblast	3	Aldh1a1, Pltp	Stk39		L. Bai, S. Mesgarzadeh, K.S. Ramesh, E.L. Huey, Y. Liu, L.A. Gray, et al., Genetic Identification of Vagal Sensory Neurons That Control Feeding, Cell. 179 (2019) 1129-43 e23. 10.1016/j.cell.2019.10.031.
s_fibroblast	stress-response fibroblast	3	Stk39			J.R.P. Geiger, T. Melcher, D.S. Koh, B. Sakmann, S.P. H., P. Jonas, et al., Relative Abundance of Subunit mRNAs Determines Gating and Ca*+ Permeability of AMPA Receptors in Principal Neurons and Interneurons in Rat CNS, Neuron. 15 (1995) 193-204. doi:10.1016/0896-6273(95)90076-4.
ependymal	ependymal cell lineage	2	Pifo
APNTS_ependymocyte	ependymocyte of the AP/NTS (DVC)	3	Tmem212, Ccdc153, Lrp2, Rarres2, Rsph4a	Slc4a5, Htr2c, Enpp2, Ttr, Krt18, Ppp1r1b
tanycyte	tanycyte	3	Slc4a5, Htr2c, Enpp2, Ttr, Krt18, Ppp1r1b	Tmem212, Ccdc153, Lrp2, Rarres2, Rsph4a
resting_microglia	non-reactive microglia	3	Csf1r, Selplg
neuron	neuron	1	Snhg11, Rbfox3/NeuN
