# Supplementary material for: A unified rodent atlas reveals the cellular complexity and evolutionary divergence of the dorsal vagal complex
Source: eLife. 2025 Oct 7;14:RP106217. doi: 10.7554/eLife.106217 (PMC12503491; doi:10.7554/eLife.106217)
Supplement: Supplementary file 5. — Expression of genes coding for neurotransmitter synthesis enzymes TH, DBH, TPH, GABA, NOS, prohormone SST, and primary neurotransmitter transporters VMAT2, VGLUT1, VGLUT2, GLYT2 per neuron in our dataset. Expression and glutamate and GABA release are specified as binary variables (i.e. 0 = no expression; 1 = expression) in the green and blue columns, respectively. The percentile of the log-normalized expression is shown. ~55% of the neurons display expression of genes related to the synthesis/release of >1 primary neurotransmitter. [file elife-106217-supp5.xlsx]

## Sheet: S5
seq_sample	cell_barcode	orig.ident	treatment	doubletfinder_class	identity_layer1	identity_layer2	TH	TH_percentile	AADC	AADC_percentile	VMAT2	VMAT2_percentile	DBH	DBH_percentile	TPH	TPH_percentile	Glutamate	VGLUT1	VGLUT1_percentile	VGLUT2	VGLUT2_percentile	GABA	Gad1_percentile	Gad2_percentile	Glycine	GLYT2_percentile	NOS	NOS_percentile	SST	SST_percentile	coexpression_neurotrasmitters
adlib_Sample_3893_AT_7	AAACCCAAGAGCAGAA-1	adlib	ad_libitum_fed	Singlet	neuron	Lrmda_class	0	0	0	0	1	56	0	0	0	0	1	0		1	77	0	0	0	0	0	0	0	0	0	yes
adlib_Sample_3893_AT_7	AAACCCAAGCAATAAC-1	adlib	ad_libitum_fed	Singlet	neuron	monoamine_class	0	0	0	0	0	0	0	0	0	0	1	0		1	48	0	0	0	0	0	0	0	1	76	yes
adlib_Sample_3893_AT_7	AAACCCAAGTCATGAA-1	adlib	ad_libitum_fed	Singlet	neuron	magnaclass2	0	0	0	0	1	67	0	0	0	0	1	0		1	48	0	0	0	0	0	1	49	0	0	yes
adlib_Sample_3893_AT_7	AAACCCAGTCTCTCTG-1	adlib	ad_libitum_fed	Singlet	neuron	magnaclass1	0	0	0	0	1	78	0	0	0	0	0	0		0	0	1	52	95	1	92	0	0	0	0	yes
adlib_Sample_3893_AT_7	AAACCCAGTGATTCAC-1	adlib	ad_libitum_fed	Singlet	neuron	corelautus_class	0	0	0	0	0	0	0	0	0	0	0	0		0	0	0	0	0	0	0	0	0	0	0	no
adlib_Sample_3893_AT_7	AAACCCATCGCTCTAC-1	adlib	ad_libitum_fed	Singlet	neuron	magnaclass1	0	0	0	0	0	0	0	0	0	0	0	0		0	0	1	78	30	0	0	0	0	0	0	no
adlib_Sample_3893_AT_7	AAACGAACAACCCTAA-1	adlib	ad_libitum_fed	Singlet	neuron	magnaclass1	0	0	0	0	0	0	0	0	0	0	1	0		1	92	1	0	71	1	52	0	0	0	0	yes
adlib_Sample_3893_AT_7	AAACGAACAGACAAAT-1	adlib	ad_libitum_fed	Singlet	neuron	magnaclass2	0	0	0	0	0	0	0	0	0	0	1	0		1	70	0	0	0	0	0	0	0	1	62	yes
adlib_Sample_3893_AT_7	AAACGCTAGCAAGGAA-1	adlib	ad_libitum_fed	Singlet	neuron	magnaclass2	0	0	0	0	0	0	0	0	0	0	0	0		0	0	0	0	0	0	0	0	0	0	0	no
adlib_Sample_3893_AT_7	AAACGCTCAACACAGG-1	adlib	ad_libitum_fed	Singlet	neuron	magnaclass1	0	0	0	0	0	0	0	0	0	0	1	0		1	35	1	27	18	0	0	0	0	0	0	yes
adlib_Sample_3893_AT_7	AAACGCTTCACTGGTA-1	adlib	ad_libitum_fed	Singlet	neuron	magnaclass2	0	0	0	0	0	0	0	0	0	0	0	0		0	0	0	0	0	0	0	0	0	1	84	no
adlib_Sample_3893_AT_7	AAACGCTTCATTGAGC-1	adlib	ad_libitum_fed	Singlet	neuron	magnaclass1	0	0	0	0	0	0	0	0	0	0	0	0		0	0	1	99	71	0	0	0	0	1	57	yes
adlib_Sample_3893_AT_7	AAACGCTTCCTCGATC-1	adlib	ad_libitum_fed	Singlet	neuron	magnaclass2	0	0	0	0	0	0	0	0	0	0	1	0		1	27	0	0	0	0	0	1	32	0	0	yes
adlib_Sample_3893_AT_7	AAAGAACAGAGCAACC-1	adlib	ad_libitum_fed	Singlet	neuron	magnaclass1	0	0	0	0	0	0	0	0	0	0	0	0		0	0	0	0	0	0	0	0	0	0	0	no
adlib_Sample_3893_AT_7	AAAGAACGTATGGGAC-1	adlib	ad_libitum_fed	Singlet	neuron	magnaclass1	0	0	0	0	0	0	0	0	0	0	0	0		0	0	1	49	0	1	74	0	0	0	0	yes
adlib_Sample_3893_AT_7	AAAGAACGTATGGTTC-1	adlib	ad_libitum_fed	Singlet	neuron	Sall3_class	0	0	0	0	1	70	0	0	0	0	1	0		1	53	1	0	63	0	0	0	0	0	0	yes
adlib_Sample_3893_AT_7	AAAGAACGTGTAACGG-1	adlib	ad_libitum_fed	Singlet	neuron	magnaclass1	0	0	0	0	0	0	0	0	0	0	0	0		0	0	1	0	85	0	0	0	0	0	0	no
adlib_Sample_3893_AT_7	AAAGAACGTTCGTACA-1	adlib	ad_libitum_fed	Singlet	neuron	Lhx2_class	0	0	0	0	0	0	0	0	0	0	0	0		0	0	0	0	0	0	0	0	0	0	0	no
adlib_Sample_3893_AT_7	AAAGAACTCTAGTACG-1	adlib	ad_libitum_fed	Singlet	neuron	magnaclass2	0	0	0	0	0	0	0	0	0	0	1	0		1	27	0	0	0	0	0	1	31	0	0	yes
adlib_Sample_3893_AT_7	AAAGGATAGCAGTCTT-1	adlib	ad_libitum_fed	Singlet	neuron	magnaclass2	0	0	0	0	0	0	0	0	0	0	1	0		1	29	0	0	0	0	0	0	0	0	0	no
adlib_Sample_3893_AT_7	AAAGGATAGCCGTAAG-1	adlib	ad_libitum_fed	Singlet	neuron	magnaclass1	0	0	0	0	0	0	0	0	0	0	1	0		1	4	1	0	43	1	29	0	0	0	0	yes
adlib_Sample_3893_AT_7	AAAGGATAGGCCTGAA-1	adlib	ad_libitum_fed	Singlet	neuron	magnaclass1	0	0	0	0	0	0	0	0	0	0	0	0		0	0	1	83	35	1	35	0	0	1	56	yes
adlib_Sample_3893_AT_7	AAAGGATCAAATGGAT-1	adlib	ad_libitum_fed	Singlet	neuron	magnaclass2	0	0	0	0	0	0	0	0	0	0	1	0		1	64	0	0	0	0	0	0	0	1	84	yes
adlib_Sample_3893_AT_7	AAAGGATGTGCATGAG-1	adlib	ad_libitum_fed	Singlet	neuron	magnaclass2	0	0	1	90	0	0	0	0	0	0	1	0		1	76	0	0	0	0	0	0	0	0	0	yes
adlib_Sample_3893_AT_7	AAAGGATTCGAACGCC-1	adlib	ad_libitum_fed	Singlet	neuron	magnaclass1	0	0	0	0	0	0	0	0	0	0	0	0		0	0	0	0	0	0	0	0	0	0	0	no
adlib_Sample_3893_AT_7	AAAGGATTCTGCCCTA-1	adlib	ad_libitum_fed	Singlet	neuron	monoamine_class	0	0	1	95	0	0	0	0	0	0	1	0		1	90	0	0	0	0	0	0	0	0	0	yes
adlib_Sample_3893_AT_7	AAAGGGCAGTGCACCC-1	adlib	ad_libitum_fed	Singlet	neuron	magnaclass1	0	0	0	0	0	0	0	0	0	0	0	0		0	0	1	0	40	1	40	0	0	0	0	yes
adlib_Sample_3893_AT_7	AAAGGGCAGTGCCGAA-1	adlib	ad_libitum_fed	Singlet	neuron	magnaclass2	0	0	0	0	0	0	0	0	0	0	1	0		1	70	1	57	0	0	0	0	0	0	0	yes
adlib_Sample_3893_AT_7	AAAGGGCCAGTCGAGA-1	adlib	ad_libitum_fed	Singlet	neuron	preganglionic_class	0	0	0	0	0	0	0	0	0	0	0	0		0	0	0	0	0	1	33	1	57	0	0	yes
adlib_Sample_3893_AT_7	AAAGGGCGTGTTCAGT-1	adlib	ad_libitum_fed	Singlet	neuron	magnaclass2	0	0	0	0	0	0	0	0	0	0	0	0		0	0	0	0	0	0	0	0	0	0	0	no
adlib_Sample_3893_AT_7	AAAGGGCTCTACAGGT-1	adlib	ad_libitum_fed	Singlet	neuron	Golli_class	0	0	0	0	0	0	0	0	0	0	1	0		1	10	0	0	0	1	4	0	0	0	0	yes
adlib_Sample_3893_AT_7	AAAGGTAAGGACTATA-1	adlib	ad_libitum_fed	Singlet	neuron	magnaclass1	0	0	0	0	0	0	0	0	0	0	0	0		0	0	1	86	21	0	0	0	0	1	40	yes
adlib_Sample_3893_AT_7	AAAGGTAGTCGACTGC-1	adlib	ad_libitum_fed	Singlet	neuron	magnaclass1	0	0	0	0	0	0	0	0	0	0	0	0		0	0	1	80	31	0	0	0	0	0	0	no
adlib_Sample_3893_AT_7	AAAGGTAGTCTCCTGT-1	adlib	ad_libitum_fed	Singlet	neuron	monoamine_class	0	0	0	0	0	0	0	0	0	0	1	0		1	97	0	0	0	0	0	0	0	1	52	yes
adlib_Sample_3893_AT_7	AAAGGTAGTCTGCGCA-1	adlib	ad_libitum_fed	Singlet	neuron	magnaclass1	0	0	0	0	0	0	0	0	0	0	0	0		0	0	0	0	0	0	0	0	0	0	0	no
adlib_Sample_3893_AT_7	AAAGTCCAGCGGATCA-1	adlib	ad_libitum_fed	Singlet	neuron	Lrmda_class	0	0	0	0	1	89	0	0	0	0	1	0		1	43	0	0	0	0	0	0	0	0	0	yes
adlib_Sample_3893_AT_7	AAAGTCCCAACATACC-1	adlib	ad_libitum_fed	Singlet	neuron	magnaclass1	0	0	0	0	0	0	0	0	0	0	1	0		1	53	1	12	49	0	0	0	0	0	0	yes
adlib_Sample_3893_AT_7	AAAGTCCGTTGTCATG-1	adlib	ad_libitum_fed	Singlet	neuron	magnaclass1	0	0	0	0	0	0	0	0	0	0	1	0		1	40	0	0	0	0	0	0	0	0	0	no
adlib_Sample_3893_AT_7	AAAGTGAAGGTGATAT-1	adlib	ad_libitum_fed	Singlet	neuron	monoamine_class	0	0	1	26	0	0	0	0	0	0	0	0		0	0	0	0	0	0	0	0	0	0	0	no
adlib_Sample_3893_AT_7	AAAGTGAAGTAACAGT-1	adlib	ad_libitum_fed	Singlet	neuron	magnaclass1	0	0	0	0	0	0	0	0	0	0	0	0		0	0	0	0	0	0	0	0	0	0	0	no
adlib_Sample_3893_AT_7	AAAGTGAAGTCGAAGC-1	adlib	ad_libitum_fed	Singlet	neuron	magnaclass2	0	0	0	0	0	0	0	0	0	0	0	0		0	0	0	0	0	0	0	0	0	1	39	no
adlib_Sample_3893_AT_7	AAAGTGAAGTGGACTG-1	adlib	ad_libitum_fed	Singlet	neuron	Lhx2_class	0	0	0	0	0	0	0	0	0	0	0	0		0	0	0	0	0	0	0	0	0	0	0	no
adlib_Sample_3893_AT_7	AAAGTGAGTACTGTTG-1	adlib	ad_libitum_fed	Singlet	neuron	Golli_class	0	0	0	0	0	0	0	0	0	0	1	0		1	71	0	0	0	0	0	0	0	0	0	no
adlib_Sample_3893_AT_7	AAAGTGATCATCTACT-1	adlib	ad_libitum_fed	Singlet	neuron	magnaclass1	0	0	0	0	0	0	0	0	0	0	0	0		0	0	1	0	89	1	7	1	21	0	0	yes
adlib_Sample_3893_AT_7	AAAGTGATCCGAGGCT-1	adlib	ad_libitum_fed	Singlet	neuron	monoamine_class	0	0	0	0	0	0	0	0	0	0	0	0		0	0	0	0	0	0	0	0	0	0	0	no
adlib_Sample_3893_AT_7	AAAGTGATCCTTCAGC-1	adlib	ad_libitum_fed	Singlet	neuron	magnaclass1	0	0	0	0	0	0	0	0	0	0	0	0		0	0	1	37	60	0	0	0	0	0	0	no
adlib_Sample_3893_AT_7	AAATGGAAGGTAAGAG-1	adlib	ad_libitum_fed	Singlet	neuron	magnaclass2	0	0	0	0	0	0	0	0	0	0	0	0		0	0	0	0	0	0	0	0	0	0	0	no
adlib_Sample_3893_AT_7	AAATGGACACATCCCT-1	adlib	ad_libitum_fed	Singlet	neuron	magnaclass1	0	0	0	0	0	0	0	0	0	0	0	0		0	0	1	0	92	1	67	0	0	0	0	yes
adlib_Sample_3893_AT_7	AAATGGACACCAGACC-1	adlib	ad_libitum_fed	Singlet	neuron	corelautus_class	0	0	0	0	0	0	0	0	0	0	0	0		0	0	0	0	0	0	0	0	0	0	0	no
adlib_Sample_3893_AT_7	AAATGGACAGCGTACC-1	adlib	ad_libitum_fed	Singlet	neuron	monoamine_class	0	0	0	0	0	0	1	51	0	0	0	0		0	0	0	0	0	0	0	0	0	0	0	no
adlib_Sample_3893_AT_7	AACAACCAGCTCCCTT-1	adlib	ad_libitum_fed	Singlet	neuron	Lrmda_class	0	0	0	0	0	0	0	0	0	0	1	0		1	42	0	0	0	1	21	1	44	0	0	yes
adlib_Sample_3893_AT_7	AACAACCAGGCAGGTT-1	adlib	ad_libitum_fed	Singlet	neuron	Lrmda_class	0	0	0	0	0	0	0	0	0	0	0	0		0	0	1	0	60	1	63	1	63	0	0	yes
adlib_Sample_3893_AT_7	AACAACCAGTGATGGC-1	adlib	ad_libitum_fed	Singlet	neuron	magnaclass1	0	0	0	0	0	0	0	0	0	0	0	0		0	0	1	72	78	1	24	0	0	1	43	yes
adlib_Sample_3893_AT_7	AACAACCCACCGTGGT-1	adlib	ad_libitum_fed	Singlet	neuron	Lrmda_class	0	0	0	0	0	0	0	0	0	0	1	0		1	35	1	0	70	0	0	0	0	0	0	yes
adlib_Sample_3893_AT_7	AACAAGACAGCCGTTG-1	adlib	ad_libitum_fed	Singlet	neuron	magnaclass2	0	0	0	0	0	0	0	0	0	0	0	0		0	0	0	0	0	0	0	0	0	0	0	no
adlib_Sample_3893_AT_7	AACAAGACATATAGCC-1	adlib	ad_libitum_fed	Singlet	neuron	Sall3_class	0	0	0	0	1	40	0	0	0	0	0	0		0	0	0	0	0	1	34	0	0	0	0	yes
adlib_Sample_3893_AT_7	AACAAGAGTTACGATC-1	adlib	ad_libitum_fed	Singlet	neuron	magnaclass2	0	0	0	0	0	0	0	0	0	0	1	0		1	95	1	34	0	0	0	0	0	0	0	yes
adlib_Sample_3893_AT_7	AACAAGAGTTATGACC-1	adlib	ad_libitum_fed	Singlet	neuron	Sall3_class	0	0	0	0	0	0	0	0	0	0	0	0		0	0	0	0	0	1	56	0	0	1	40	yes
adlib_Sample_3893_AT_7	AACAAGAGTTCACGAT-1	adlib	ad_libitum_fed	Singlet	neuron	corelautus_class	0	0	0	0	0	0	0	0	0	0	0	0		0	0	0	0	0	1	97	0	0	0	0	no
adlib_Sample_3893_AT_7	AACAAGATCGACCAAT-1	adlib	ad_libitum_fed	Singlet	neuron	monoamine_class	0	0	1	68	0	0	0	0	0	0	0	0		0	0	0	0	0	0	0	0	0	1	46	yes
adlib_Sample_3893_AT_7	AACAAGATCTCACTCG-1	adlib	ad_libitum_fed	Singlet	neuron	monoamine_class	0	0	0	0	0	0	0	0	0	0	1	0		1	33	0	0	0	0	0	0	0	0	0	no
adlib_Sample_3893_AT_7	AACACACCAATAACCC-1	adlib	ad_libitum_fed	Singlet	neuron	magnaclass1	0	0	0	0	1	60	0	0	0	0	0	0		0	0	1	68	53	1	20	0	0	1	39	yes
adlib_Sample_3893_AT_7	AACACACCAATAGTCC-1	adlib	ad_libitum_fed	Singlet	neuron	magnaclass1	0	0	0	0	0	0	0	0	0	0	0	0		0	0	1	0	93	0	0	1	92	0	0	yes
adlib_Sample_3893_AT_7	AACACACGTGTATACC-1	adlib	ad_libitum_fed	Singlet	neuron	magnaclass2	0	0	0	0	0	0	0	0	0	0	1	0		1	28	0	0	0	0	0	0	0	0	0	no
adlib_Sample_3893_AT_7	AACAGGGGTAAGTTAG-1	adlib	ad_libitum_fed	Singlet	neuron	Lrmda_class	0	0	0	0	0	0	0	0	0	0	1	0		1	51	0	0	0	0	0	0	0	0	0	no
adlib_Sample_3893_AT_7	AACAGGGGTCGAACGA-1	adlib	ad_libitum_fed	Singlet	neuron	Lrmda_class	0	0	0	0	0	0	0	0	0	0	1	0		1	33	1	0	48	1	72	1	84	0	0	yes
adlib_Sample_3893_AT_7	AACAGGGGTCGTGATT-1	adlib	ad_libitum_fed	Singlet	neuron	Lrmda_class	0	0	0	0	0	0	0	0	0	0	0	0		0	0	0	0	0	1	49	0	0	0	0	no
adlib_Sample_3893_AT_7	AACAGGGGTGAGACGT-1	adlib	ad_libitum_fed	Singlet	neuron	Sall3_class	0	0	0	0	0	0	0	0	0	0	0	0		0	0	0	0	0	1	98	0	0	0	0	no
adlib_Sample_3893_AT_7	AACAGGGTCGTAATGC-1	adlib	ad_libitum_fed	Singlet	neuron	magnaclass1	0	0	0	0	0	0	0	0	0	0	1	0		1	78	1	65	0	0	0	0	0	0	0	yes
adlib_Sample_3893_AT_7	AACCAACAGGAACTCG-1	adlib	ad_libitum_fed	Singlet	neuron	Lhx2_class	0	0	0	0	1	67	0	0	0	0	0	0		0	0	0	0	0	0	0	0	0	0	0	no
adlib_Sample_3893_AT_7	AACCAACAGGTAGCCA-1	adlib	ad_libitum_fed	Singlet	neuron	magnaclass2	0	0	0	0	0	0	0	0	0	0	0	0		0	0	0	0	0	0	0	0	0	0	0	no
adlib_Sample_3893_AT_7	AACCAACAGGTCCAGA-1	adlib	ad_libitum_fed	Singlet	neuron	magnaclass2	0	0	0	0	0	0	0	0	0	0	1	0		1	11	1	0	6	0	0	0	0	1	44	yes
adlib_Sample_3893_AT_7	AACCAACCAGCTAACT-1	adlib	ad_libitum_fed	Singlet	neuron	Lhx2_class	0	0	0	0	0	0	0	0	0	0	1	0		1	52	0	0	0	0	0	0	0	0	0	no
adlib_Sample_3893_AT_7	AACCAACCATCAGCGC-1	adlib	ad_libitum_fed	Singlet	neuron	Golli_class	0	0	0	0	0	0	0	0	0	0	0	0		0	0	0	0	0	1	38	0	0	0	0	no
adlib_Sample_3893_AT_7	AACCAACGTCGTACTA-1	adlib	ad_libitum_fed	Singlet	neuron	magnaclass1	0	0	0	0	0	0	0	0	0	0	1	0		1	82	1	70	22	0	0	0	0	0	0	yes
adlib_Sample_3893_AT_7	AACCAACGTTAGTTCG-1	adlib	ad_libitum_fed	Singlet	neuron	magnaclass1	0	0	0	0	0	0	0	0	0	0	0	0		0	0	1	0	73	0	0	1	62	1	58	yes
adlib_Sample_3893_AT_7	AACCACAAGCGAGTCA-1	adlib	ad_libitum_fed	Singlet	neuron	Lrmda_class	0	0	0	0	0	0	0	0	0	0	1	0		1	77	0	0	0	1	86	0	0	0	0	yes
adlib_Sample_3893_AT_7	AACCACAGTACTAGCT-1	adlib	ad_libitum_fed	Singlet	neuron	magnaclass1	0	0	0	0	0	0	0	0	0	0	1	0		1	44	1	34	69	1	60	0	0	0	0	yes
adlib_Sample_3893_AT_7	AACCACAGTTAGGACG-1	adlib	ad_libitum_fed	Singlet	neuron	magnaclass1	0	0	0	0	0	0	0	0	0	0	0	0		0	0	1	45	32	0	0	0	0	0	0	no
adlib_Sample_3893_AT_7	AACCACATCTGTAAGC-1	adlib	ad_libitum_fed	Singlet	neuron	magnaclass1	0	0	0	0	0	0	0	0	0	0	1	0		1	5	1	5	80	1	31	1	9	0	0	yes
adlib_Sample_3893_AT_7	AACCATGAGCGTGTTT-1	adlib	ad_libitum_fed	Singlet	neuron	Lrmda_class	0	0	0	0	0	0	0	0	0	0	0	0		0	0	1	97	30	0	0	0	0	0	0	no
adlib_Sample_3893_AT_7	AACCATGAGTGTAGAT-1	adlib	ad_libitum_fed	Singlet	neuron	magnaclass2	1	43	1	36	0	0	0	0	0	0	0	0		0	0	0	0	0	0	0	0	0	0	0	no
adlib_Sample_3893_AT_7	AACCATGCAACATCGT-1	adlib	ad_libitum_fed	Singlet	neuron	Sall3_class	0	0	0	0	0	0	0	0	0	0	1	0		1	62	1	95	36	0	0	0	0	0	0	yes
adlib_Sample_3893_AT_7	AACCATGCACGCGTGT-1	adlib	ad_libitum_fed	Singlet	neuron	monoamine_class	0	0	0	0	0	0	0	0	0	0	0	0		0	0	0	0	0	0	0	0	0	0	0	no
adlib_Sample_3893_AT_7	AACCATGCAGATGCGA-1	adlib	ad_libitum_fed	Singlet	neuron	monoamine_class	0	0	0	0	0	0	0	0	0	0	0	0		0	0	0	0	0	0	0	0	0	0	0	no
adlib_Sample_3893_AT_7	AACCATGGTAACATCC-1	adlib	ad_libitum_fed	Singlet	neuron	Sall3_class	0	0	0	0	0	0	0	0	0	0	1	0		1	49	1	3	0	1	11	0	0	0	0	yes
adlib_Sample_3893_AT_7	AACCATGTCAACGTGT-1	adlib	ad_libitum_fed	Singlet	neuron	magnaclass2	0	0	0	0	0	0	0	0	0	0	1	0		1	74	0	0	0	0	0	0	0	0	0	no
adlib_Sample_3893_AT_7	AACCATGTCAAGAATG-1	adlib	ad_libitum_fed	Singlet	neuron	magnaclass1	0	0	0	0	0	0	0	0	0	0	0	0		0	0	1	0	42	1	80	0	0	0	0	yes
adlib_Sample_3893_AT_7	AACCATGTCGTGGTAT-1	adlib	ad_libitum_fed	Singlet	neuron	magnaclass2	0	0	0	0	0	0	0	0	0	0	0	0		0	0	0	0	0	0	0	0	0	0	0	no
adlib_Sample_3893_AT_7	AACCATGTCTCGGGAC-1	adlib	ad_libitum_fed	Singlet	neuron	magnaclass1	0	0	0	0	1	62	0	0	0	0	1	0		1	42	0	0	0	1	79	0	0	1	86	yes
adlib_Sample_3893_AT_7	AACCATGTCTGCGGCA-1	adlib	ad_libitum_fed	Singlet	neuron	magnaclass1	0	0	0	0	0	0	0	0	0	0	1	0		1	39	1	0	20	0	0	0	0	0	0	yes
adlib_Sample_3893_AT_7	AACCATGTCTTTGCAT-1	adlib	ad_libitum_fed	Singlet	neuron	magnaclass1	0	0	0	0	0	0	0	0	0	0	0	0		0	0	1	0	91	1	64	0	0	0	0	yes
adlib_Sample_3893_AT_7	AACCCAACACTGTTCC-1	adlib	ad_libitum_fed	Singlet	neuron	Lhx2_class	0	0	0	0	1	38	0	0	0	0	0	0		0	0	0	0	0	0	0	0	0	0	0	no
adlib_Sample_3893_AT_7	AACCCAAGTATGAGAT-1	adlib	ad_libitum_fed	Singlet	neuron	magnaclass1	0	0	0	0	0	0	0	0	0	0	0	0		0	0	0	0	0	1	68	0	0	0	0	no
adlib_Sample_3893_AT_7	AACCCAAGTCGAGATG-1	adlib	ad_libitum_fed	Singlet	neuron	Lhx2_class	0	0	0	0	0	0	0	0	0	0	0	0		0	0	0	0	0	0	0	0	0	1	44	no
adlib_Sample_3893_AT_7	AACCCAATCCCTGGTT-1	adlib	ad_libitum_fed	Singlet	neuron	corelautus_class	0	0	0	0	0	0	0	0	0	0	0	0		0	0	0	0	0	0	0	0	0	0	0	no
adlib_Sample_3893_AT_7	AACCCAATCTACACAG-1	adlib	ad_libitum_fed	Singlet	neuron	corelautus_class	0	0	0	0	0	0	0	0	0	0	0	0		0	0	0	0	0	0	0	0	0	0	0	no
adlib_Sample_3893_AT_7	AACCTGAAGATCGCTT-1	adlib	ad_libitum_fed	Singlet	neuron	Lhx2_class	0	0	0	0	0	0	0	0	0	0	1	0		1	83	0	0	0	0	0	0	0	0	0	no
adlib_Sample_3893_AT_7	AACCTGAAGGGAGTTC-1	adlib	ad_libitum_fed	Singlet	neuron	Lhx2_class	0	0	0	0	0	0	0	0	0	0	0	0		0	0	0	0	0	0	0	0	0	0	0	no
adlib_Sample_3893_AT_7	AACCTGAGTCACTTAG-1	adlib	ad_libitum_fed	Singlet	neuron	magnaclass1	0	0	0	0	0	0	0	0	0	0	1	0		1	81	1	68	53	0	0	0	0	0	0	yes
adlib_Sample_3893_AT_7	AACCTGAGTGGCTTGC-1	adlib	ad_libitum_fed	Singlet	neuron	monoamine_class	0	0	0	0	0	0	0	0	0	0	0	0		0	0	0	0	0	0	0	0	0	0	0	no
adlib_Sample_3893_AT_7	AACCTGAGTTTAGTCG-1	adlib	ad_libitum_fed	Singlet	neuron	monoamine_class	0	0	0	0	0	0	0	0	0	0	1	0		1	64	1	0	38	0	0	1	62	0	0	yes
adlib_Sample_3893_AT_7	AACCTGATCACTGATG-1	adlib	ad_libitum_fed	Singlet	neuron	Sall3_class	0	0	0	0	0	0	0	0	0	0	1	0		1	50	1	76	0	0	0	0	0	0	0	yes
adlib_Sample_3893_AT_7	AACCTTTCAACCGTAT-1	adlib	ad_libitum_fed	Singlet	neuron	magnaclass1	0	0	0	0	0	0	0	0	0	0	1	0		1	60	1	15	0	1	57	0	0	0	0	yes
adlib_Sample_3893_AT_7	AACCTTTGTAGTGATA-1	adlib	ad_libitum_fed	Singlet	neuron	magnaclass2	0	0	0	0	0	0	0	0	0	0	0	0		0	0	0	0	0	0	0	0	0	0	0	no
adlib_Sample_3893_AT_7	AACCTTTGTCACGACC-1	adlib	ad_libitum_fed	Singlet	neuron	magnaclass2	0	0	0	0	0	0	0	0	0	0	0	0		0	0	0	0	0	0	0	1	26	0	0	no
adlib_Sample_3893_AT_7	AACCTTTTCCGTAGTA-1	adlib	ad_libitum_fed	Singlet	neuron	magnaclass1	0	0	0	0	0	0	0	0	0	0	0	0		0	0	1	97	0	0	0	0	0	0	0	no
adlib_Sample_3893_AT_7	AACCTTTTCCTCTTTC-1	adlib	ad_libitum_fed	Singlet	neuron	monoamine_class	0	0	1	24	0	0	0	0	0	0	0	0		0	0	1	0	42	0	0	0	0	0	0	yes
adlib_Sample_3893_AT_7	AACCTTTTCTATTTCG-1	adlib	ad_libitum_fed	Singlet	neuron	Sall3_class	0	0	0	0	1	4	0	0	0	0	1	0		1	1	1	61	40	1	24	0	0	1	2	yes
adlib_Sample_3893_AT_7	AACGAAAAGAGCCCAA-1	adlib	ad_libitum_fed	Singlet	neuron	Lrmda_class	0	0	0	0	1	57	0	0	0	0	0	0		0	0	1	27	19	1	18	0	0	0	0	yes
adlib_Sample_3893_AT_7	AACGAAAAGAGTTGAT-1	adlib	ad_libitum_fed	Singlet	neuron	magnaclass1	0	0	0	0	0	0	0	0	0	0	1	0		1	97	1	0	52	0	0	0	0	0	0	yes
adlib_Sample_3893_AT_7	AACGAAAAGGGCAGTT-1	adlib	ad_libitum_fed	Singlet	neuron	magnaclass2	0	0	0	0	0	0	0	0	0	0	1	0		1	84	1	0	58	1	91	0	0	0	0	yes
adlib_Sample_3893_AT_7	AACGAAACAGCATGCC-1	adlib	ad_libitum_fed	Singlet	neuron	corelautus_class	0	0	0	0	0	0	0	0	0	0	0	0		0	0	0	0	0	0	0	0	0	0	0	no
adlib_Sample_3893_AT_7	AACGAAAGTTCTCACC-1	adlib	ad_libitum_fed	Singlet	neuron	corelautus_class	0	0	0	0	1	99	0	0	0	0	0	0		0	0	1	0	99	1	99	0	0	0	0	yes
adlib_Sample_3893_AT_7	AACGAAATCAGCAGAG-1	adlib	ad_libitum_fed	Singlet	neuron	magnaclass2	0	0	0	0	0	0	0	0	0	0	0	0		0	0	0	0	0	0	0	1	99	0	0	no
adlib_Sample_3893_AT_7	AACGGGAAGACCCTTA-1	adlib	ad_libitum_fed	Singlet	neuron	magnaclass1	0	0	0	0	0	0	0	0	0	0	0	0		0	0	1	52	38	0	0	1	94	1	59	yes
adlib_Sample_3893_AT_7	AACGGGAAGCTGTGCC-1	adlib	ad_libitum_fed	Singlet	neuron	monoamine_class	0	0	0	0	0	0	1	78	0	0	1	0		1	83	0	0	0	0	0	0	0	0	0	yes
adlib_Sample_3893_AT_7	AACGGGATCGGAAGGT-1	adlib	ad_libitum_fed	Singlet	neuron	Lhx2_class	0	0	0	0	0	0	0	0	0	0	0	0		0	0	0	0	0	0	0	0	0	0	0	no
adlib_Sample_3893_AT_7	AACGGGATCGGTGTAT-1	adlib	ad_libitum_fed	Singlet	neuron	magnaclass2	0	0	0	0	0	0	0	0	0	0	0	0		0	0	0	0	0	0	0	0	0	0	0	no
adlib_Sample_3893_AT_7	AACGTCAGTCAACCTA-1	adlib	ad_libitum_fed	Singlet	neuron	magnaclass1	0	0	0	0	0	0	0	0	0	0	0	0		0	0	1	0	99	0	0	0	0	0	0	no
adlib_Sample_3893_AT_7	AACGTCATCCACATAG-1	adlib	ad_libitum_fed	Singlet	neuron	magnaclass2	0	0	0	0	0	0	0	0	0	0	0	0		0	0	0	0	0	0	0	0	0	1	38	no
adlib_Sample_3893_AT_7	AACGTCATCTAAGAAG-1	adlib	ad_libitum_fed	Singlet	neuron	magnaclass1	0	0	0	0	0	0	0	0	0	0	0	0		0	0	1	84	0	0	0	0	0	0	0	no
adlib_Sample_3893_AT_7	AACTTCTAGCATGGGT-1	adlib	ad_libitum_fed	Singlet	neuron	magnaclass1	0	0	0	0	0	0	0	0	0	0	0	0		0	0	1	0	72	0	0	0	0	0	0	no
adlib_Sample_3893_AT_7	AACTTCTAGCCGATAG-1	adlib	ad_libitum_fed	Singlet	neuron	magnaclass2	0	0	0	0	0	0	0	0	0	0	0	0		0	0	1	90	0	0	0	0	0	0	0	no
adlib_Sample_3893_AT_7	AACTTCTAGCTGACCC-1	adlib	ad_libitum_fed	Singlet	neuron	magnaclass1	0	0	0	0	0	0	0	0	0	0	1	0		1	24	1	0	12	1	11	0	0	0	0	yes
adlib_Sample_3893_AT_7	AACTTCTGTTGCATAC-1	adlib	ad_libitum_fed	Singlet	neuron	Lhx2_class	0	0	0	0	0	0	0	0	0	0	0	0		0	0	0	0	0	0	0	1	69	0	0	no
adlib_Sample_3893_AT_7	AACTTCTGTTGGACCC-1	adlib	ad_libitum_fed	Singlet	neuron	magnaclass2	0	0	0	0	0	0	0	0	0	0	1	0		1	78	0	0	0	0	0	0	0	0	0	no
adlib_Sample_3893_AT_7	AACTTCTTCACGTAGT-1	adlib	ad_libitum_fed	Singlet	neuron	magnaclass2	0	0	0	0	0	0	0	0	0	0	1	0		1	69	0	0	0	0	0	0	0	0	0	no
adlib_Sample_3893_AT_7	AACTTCTTCTCAGTCC-1	adlib	ad_libitum_fed	Singlet	neuron	magnaclass1	0	0	0	0	0	0	0	0	0	0	0	0		0	0	1	0	87	1	89	0	0	0	0	yes
adlib_Sample_3893_AT_7	AAGAACAAGGTCGAGT-1	adlib	ad_libitum_fed	Singlet	neuron	magnaclass2	0	0	0	0	0	0	0	0	0	0	0	0		0	0	0	0	0	0	0	0	0	0	0	no
adlib_Sample_3893_AT_7	AAGAACAAGTCGAGGT-1	adlib	ad_libitum_fed	Singlet	neuron	monoamine_class	0	0	0	0	0	0	0	0	0	0	0	0		0	0	0	0	0	0	0	0	0	0	0	no
adlib_Sample_3893_AT_7	AAGAACAAGTGCACCC-1	adlib	ad_libitum_fed	Singlet	neuron	magnaclass1	0	0	0	0	0	0	0	0	0	0	0	0		0	0	1	49	87	1	74	0	0	0	0	yes
adlib_Sample_3893_AT_7	AAGAACACAGTCCCGA-1	adlib	ad_libitum_fed	Singlet	neuron	magnaclass1	0	0	0	0	0	0	0	0	0	0	0	0		0	0	1	38	0	1	26	0	0	0	0	yes
adlib_Sample_3893_AT_7	AAGAACACATAGCACT-1	adlib	ad_libitum_fed	Singlet	neuron	magnaclass2	0	0	0	0	0	0	0	0	0	0	1	0		1	69	0	0	0	0	0	0	0	1	7	yes
adlib_Sample_3893_AT_7	AAGAACATCGGCTATA-1	adlib	ad_libitum_fed	Singlet	neuron	magnaclass1	0	0	0	0	0	0	0	0	0	0	0	0		0	0	1	0	74	0	0	1	63	1	60	yes
adlib_Sample_3893_AT_7	AAGAACATCTAGCATG-1	adlib	ad_libitum_fed	Singlet	neuron	magnaclass1	0	0	0	0	0	0	0	0	0	0	0	0		0	0	0	0	0	0	0	0	0	0	0	no
adlib_Sample_3893_AT_7	AAGACAACAAGTCCCG-1	adlib	ad_libitum_fed	Singlet	neuron	magnaclass2	0	0	1	72	0	0	0	0	0	0	0	0		0	0	0	0	0	0	0	0	0	0	0	no
adlib_Sample_3893_AT_7	AAGACAAGTGAGCCAA-1	adlib	ad_libitum_fed	Singlet	neuron	monoamine_class	0	0	0	0	0	0	0	0	0	0	1	0		1	57	1	44	0	0	0	0	0	1	81	yes
adlib_Sample_3893_AT_7	AAGACAATCAAGCTGT-1	adlib	ad_libitum_fed	Singlet	neuron	magnaclass2	0	0	0	0	0	0	0	0	0	0	0	0		0	0	0	0	0	0	0	0	0	1	66	no
adlib_Sample_3893_AT_7	AAGACAATCCATATGG-1	adlib	ad_libitum_fed	Singlet	neuron	magnaclass2	0	0	0	0	0	0	0	0	0	0	0	0		0	0	0	0	0	0	0	0	0	0	0	no
adlib_Sample_3893_AT_7	AAGACAATCCGCAAAT-1	adlib	ad_libitum_fed	Singlet	neuron	Sall3_class	0	0	0	0	1	60	0	0	0	0	0	0		0	0	1	0	97	0	0	0	0	0	0	yes
adlib_Sample_3893_AT_7	AAGACAATCTTGTGCC-1	adlib	ad_libitum_fed	Singlet	neuron	magnaclass2	0	0	0	0	0	0	0	0	0	0	1	0		1	16	0	0	0	0	0	1	22	1	92	yes
adlib_Sample_3893_AT_7	AAGACTCAGCGACTTT-1	adlib	ad_libitum_fed	Singlet	neuron	magnaclass2	0	0	0	0	0	0	0	0	0	0	1	0		1	23	1	18	39	1	77	1	29	0	0	yes
adlib_Sample_3893_AT_7	AAGACTCCACATACGT-1	adlib	ad_libitum_fed	Singlet	neuron	magnaclass1	0	0	0	0	0	0	0	0	0	0	1	0		1	32	1	90	85	0	0	0	0	0	0	yes
adlib_Sample_3893_AT_7	AAGACTCCATGAAGGC-1	adlib	ad_libitum_fed	Singlet	neuron	magnaclass2	0	0	0	0	0	0	0	0	0	0	0	0		0	0	0	0	0	0	0	0	0	0	0	no
adlib_Sample_3893_AT_7	AAGACTCGTTAGGGAC-1	adlib	ad_libitum_fed	Singlet	neuron	magnaclass1	0	0	0	0	0	0	0	0	0	0	0	0		0	0	1	75	60	1	26	0	0	0	0	yes
adlib_Sample_3893_AT_7	AAGACTCTCGATCCCT-1	adlib	ad_libitum_fed	Singlet	neuron	magnaclass1	0	0	0	0	0	0	0	0	0	0	0	0		0	0	1	78	0	0	0	0	0	0	0	no
adlib_Sample_3893_AT_7	AAGATAGAGGGCCCTT-1	adlib	ad_libitum_fed	Singlet	neuron	magnaclass2	0	0	0	0	0	0	0	0	0	0	0	0		0	0	0	0	0	0	0	0	0	0	0	no
adlib_Sample_3893_AT_7	AAGCATCCAACATACC-1	adlib	ad_libitum_fed	Singlet	neuron	magnaclass2	0	0	1	54	0	0	0	0	0	0	1	0		1	70	0	0	0	0	0	0	0	0	0	yes
adlib_Sample_3893_AT_7	AAGCATCCAAGCGCAA-1	adlib	ad_libitum_fed	Singlet	neuron	magnaclass2	0	0	0	0	0	0	0	0	0	0	1	0		1	97	0	0	0	0	0	0	0	1	69	yes
adlib_Sample_3893_AT_7	AAGCATCCAATTCTCT-1	adlib	ad_libitum_fed	Singlet	neuron	corelautus_class	0	0	0	0	0	0	0	0	0	0	1	0		1	99	0	0	0	0	0	0	0	0	0	no
adlib_Sample_3893_AT_7	AAGCATCTCACCTCAC-1	adlib	ad_libitum_fed	Singlet	neuron	magnaclass2	0	0	0	0	0	0	0	0	0	0	1	0		1	38	0	0	0	0	0	1	73	0	0	yes
adlib_Sample_3893_AT_7	AAGCATCTCGACATCA-1	adlib	ad_libitum_fed	Singlet	neuron	magnaclass1	0	0	0	0	0	0	0	0	0	0	1	0		1	41	1	0	75	1	21	0	0	0	0	yes
adlib_Sample_3893_AT_7	AAGCCATCAAATGCTC-1	adlib	ad_libitum_fed	Singlet	neuron	Lhx2_class	0	0	0	0	1	60	0	0	0	0	0	0		0	0	0	0	0	0	0	0	0	0	0	no
adlib_Sample_3893_AT_7	AAGCCATCAAGGATGC-1	adlib	ad_libitum_fed	Singlet	neuron	Lhx2_class	0	0	0	0	0	0	0	0	0	0	0	0		0	0	0	0	0	0	0	1	19	0	0	no
adlib_Sample_3893_AT_7	AAGCCATGTCCAATCA-1	adlib	ad_libitum_fed	Singlet	neuron	magnaclass1	0	0	0	0	0	0	0	0	0	0	0	0		0	0	1	56	83	0	0	0	0	1	14	yes
adlib_Sample_3893_AT_7	AAGCCATTCCGTCACT-1	adlib	ad_libitum_fed	Singlet	neuron	preganglionic_class	0	0	0	0	0	0	0	0	0	0	1	0		1	26	0	0	0	0	0	0	0	0	0	no
adlib_Sample_3893_AT_7	AAGCGAGAGTAGAATC-1	adlib	ad_libitum_fed	Singlet	neuron	magnaclass2	0	0	0	0	0	0	0	0	0	0	0	0		0	0	1	0	41	0	0	0	0	1	86	yes
adlib_Sample_3893_AT_7	AAGCGAGAGTCACTCA-1	adlib	ad_libitum_fed	Singlet	neuron	magnaclass1	0	0	0	0	0	0	0	0	0	0	1	0		1	70	1	0	77	1	43	1	88	0	0	yes
adlib_Sample_3893_AT_7	AAGCGAGCAGAGTGAC-1	adlib	ad_libitum_fed	Singlet	neuron	magnaclass1	0	0	0	0	0	0	0	0	0	0	0	0		0	0	1	0	90	0	0	0	0	0	0	no
adlib_Sample_3893_AT_7	AAGCGAGCAGCGTATT-1	adlib	ad_libitum_fed	Singlet	neuron	magnaclass2	0	0	1	62	0	0	0	0	0	0	0	0		0	0	0	0	0	1	53	0	0	0	0	yes
adlib_Sample_3893_AT_7	AAGCGAGCATGGAATA-1	adlib	ad_libitum_fed	Singlet	neuron	magnaclass2	0	0	1	65	0	0	0	0	0	0	0	0		0	0	0	0	0	0	0	0	0	0	0	no
adlib_Sample_3893_AT_7	AAGCGAGTCCAAGGGA-1	adlib	ad_libitum_fed	Singlet	neuron	monoamine_class	0	0	1	85	0	0	0	0	0	0	1	0		1	61	0	0	0	0	0	0	0	0	0	yes
adlib_Sample_3893_AT_7	AAGCGAGTCGCTACAA-1	adlib	ad_libitum_fed	Singlet	neuron	corelautus_class	0	0	0	0	0	0	0	0	0	0	0	0		0	0	0	0	0	0	0	0	0	0	0	no
adlib_Sample_3893_AT_7	AAGCGTTAGCCTTTCC-1	adlib	ad_libitum_fed	Singlet	neuron	Lhx2_class	0	0	0	0	0	0	0	0	0	0	1	0		1	74	0	0	0	0	0	0	0	0	0	no
adlib_Sample_3893_AT_7	AAGCGTTCACAGAAGC-1	adlib	ad_libitum_fed	Singlet	neuron	magnaclass2	0	0	0	0	0	0	0	0	0	0	0	0		0	0	0	0	0	0	0	0	0	0	0	no
adlib_Sample_3893_AT_7	AAGCGTTGTGGATCAG-1	adlib	ad_libitum_fed	Singlet	neuron	magnaclass1	0	0	0	0	0	0	0	0	0	0	0	0		0	0	0	0	0	0	0	0	0	0	0	no
adlib_Sample_3893_AT_7	AAGCGTTTCCCGATCT-1	adlib	ad_libitum_fed	Singlet	neuron	magnaclass2	0	0	0	0	0	0	0	0	0	0	0	0		0	0	0	0	0	0	0	0	0	0	0	no
adlib_Sample_3893_AT_7	AAGGAATGTGACACGA-1	adlib	ad_libitum_fed	Singlet	neuron	magnaclass2	0	0	0	0	1	76	0	0	0	0	0	0		0	0	0	0	0	0	0	0	0	1	55	yes
adlib_Sample_3893_AT_7	AAGGAATTCAAGGAGC-1	adlib	ad_libitum_fed	Singlet	neuron	magnaclass2	0	0	0	0	0	0	0	0	0	0	1	0		1	94	0	0	0	0	0	0	0	0	0	no
adlib_Sample_3893_AT_7	AAGGAATTCTCCAATT-1	adlib	ad_libitum_fed	Singlet	neuron	magnaclass1	1	55	0	0	0	0	0	0	0	0	1	0		1	58	1	97	33	0	0	1	57	0	0	yes
adlib_Sample_3893_AT_7	AAGGTAACAGCATCTA-1	adlib	ad_libitum_fed	Singlet	neuron	magnaclass1	0	0	0	0	0	0	0	0	0	0	0	0		0	0	1	0	32	0	0	0	0	1	53	yes
adlib_Sample_3893_AT_7	AAGGTAACAGGGTCTC-1	adlib	ad_libitum_fed	Singlet	neuron	Lrmda_class	0	0	0	0	0	0	0	0	0	0	0	0		0	0	1	0	49	0	0	1	54	0	0	yes
adlib_Sample_3893_AT_7	AAGGTAACATTGCCGG-1	adlib	ad_libitum_fed	Singlet	neuron	Lhx2_class	0	0	0	0	0	0	0	0	0	0	1	0		1	86	0	0	0	0	0	0	0	0	0	no
adlib_Sample_3893_AT_7	AAGGTAAGTGATAGAT-1	adlib	ad_libitum_fed	Singlet	neuron	magnaclass1	0	0	0	0	0	0	0	0	0	0	0	0		0	0	1	77	0	1	65	0	0	0	0	yes
adlib_Sample_3893_AT_7	AAGGTAATCAGCGGAA-1	adlib	ad_libitum_fed	Singlet	neuron	magnaclass1	0	0	0	0	0	0	0	0	0	0	0	0		0	0	1	0	77	1	43	0	0	0	0	yes
adlib_Sample_3893_AT_7	AAGTACCAGGCGTTGA-1	adlib	ad_libitum_fed	Singlet	neuron	monoamine_class	0	0	1	33	0	0	0	0	0	0	1	0		1	40	0	0	0	0	0	0	0	0	0	yes
adlib_Sample_3893_AT_7	AAGTACCCACCTGCAG-1	adlib	ad_libitum_fed	Singlet	neuron	magnaclass2	0	0	0	0	0	0	0	0	0	0	1	0		1	59	0	0	0	0	0	0	0	0	0	no
adlib_Sample_3893_AT_7	AAGTACCCACGGTGAA-1	adlib	ad_libitum_fed	Singlet	neuron	Sall3_class	0	0	0	0	0	0	0	0	0	0	1	0		1	96	1	0	26	1	26	0	0	1	46	yes
adlib_Sample_3893_AT_7	AAGTACCGTCAACATC-1	adlib	ad_libitum_fed	Singlet	neuron	magnaclass2	0	0	0	0	0	0	0	0	0	0	0	0		0	0	0	0	0	0	0	1	43	1	40	yes
adlib_Sample_3893_AT_7	AAGTACCGTCGCTTAA-1	adlib	ad_libitum_fed	Singlet	neuron	magnaclass1	0	0	0	0	0	0	0	0	0	0	1	0		1	64	0	0	0	0	0	1	61	0	0	yes
adlib_Sample_3893_AT_7	AAGTACCTCTCGCCTA-1	adlib	ad_libitum_fed	Singlet	neuron	magnaclass1	0	0	0	0	0	0	0	0	0	0	1	0		1	88	0	0	0	0	0	0	0	0	0	no
adlib_Sample_3893_AT_7	AAGTACCTCTCGGTCT-1	adlib	ad_libitum_fed	Singlet	neuron	magnaclass2	0	0	0	0	0	0	0	0	0	0	0	0		0	0	0	0	0	0	0	0	0	0	0	no
adlib_Sample_3893_AT_7	AAGTCGTAGTCACGAG-1	adlib	ad_libitum_fed	Singlet	neuron	magnaclass2	0	0	0	0	0	0	0	0	0	0	0	0		0	0	0	0	0	0	0	0	0	0	0	no
adlib_Sample_3893_AT_7	AAGTCGTCAGTTGGTT-1	adlib	ad_libitum_fed	Singlet	neuron	magnaclass2	0	0	0	0	0	0	0	0	0	0	0	0		0	0	0	0	0	0	0	0	0	0	0	no
adlib_Sample_3893_AT_7	AAGTCGTTCCAGTGTA-1	adlib	ad_libitum_fed	Singlet	neuron	magnaclass2	0	0	0	0	0	0	0	0	0	0	1	0		1	66	0	0	0	0	0	0	0	0	0	no
adlib_Sample_3893_AT_7	AAGTCGTTCGGAGTAG-1	adlib	ad_libitum_fed	Singlet	neuron	magnaclass2	0	0	0	0	0	0	0	0	0	0	0	0		0	0	0	0	0	0	0	0	0	0	0	no
adlib_Sample_3893_AT_7	AAGTGAAAGGAACTAT-1	adlib	ad_libitum_fed	Singlet	neuron	Lrmda_class	0	0	0	0	0	0	0	0	0	0	1	0		1	28	0	0	0	1	44	0	0	0	0	yes
adlib_Sample_3893_AT_7	AAGTGAAAGTCAATCC-1	adlib	ad_libitum_fed	Singlet	neuron	monoamine_class	0	0	0	0	0	0	0	0	0	0	0	0		0	0	0	0	0	0	0	0	0	0	0	no
adlib_Sample_3893_AT_7	AAGTGAACAATTGCGT-1	adlib	ad_libitum_fed	Singlet	neuron	Lrmda_class	0	0	0	0	0	0	0	0	0	0	1	0		1	94	0	0	0	1	89	0	0	0	0	yes
adlib_Sample_3893_AT_7	AAGTGAACAGAAGTGC-1	adlib	ad_libitum_fed	Singlet	neuron	monoamine_class	0	0	1	80	0	0	0	0	0	0	0	0		0	0	0	0	0	0	0	0	0	0	0	no
adlib_Sample_3893_AT_7	AAGTGAATCCGTGTCT-1	adlib	ad_libitum_fed	Singlet	neuron	corelautus_class	0	0	0	0	0	0	0	0	0	0	0	0		0	0	0	0	0	0	0	0	0	0	0	no
adlib_Sample_3893_AT_7	AAGTGAATCGCAGTGC-1	adlib	ad_libitum_fed	Singlet	neuron	magnaclass1	0	0	0	0	0	0	0	0	0	0	0	0		0	0	1	90	0	0	0	0	0	0	0	no
adlib_Sample_3893_AT_7	AAGTTCGAGAATACAC-1	adlib	ad_libitum_fed	Singlet	neuron	magnaclass1	0	0	0	0	0	0	0	0	0	0	0	0		0	0	1	75	99	1	64	0	0	1	77	yes
adlib_Sample_3893_AT_7	AAGTTCGGTCAGGTAG-1	adlib	ad_libitum_fed	Singlet	neuron	magnaclass1	0	0	0	0	1	69	0	0	0	0	0	0		0	0	1	40	62	1	28	0	0	0	0	yes
adlib_Sample_3893_AT_7	AAGTTCGTCATACGAC-1	adlib	ad_libitum_fed	Singlet	neuron	magnaclass1	0	0	0	0	0	0	0	0	0	0	1	0		1	22	1	0	37	1	10	0	0	1	99	yes
adlib_Sample_3893_AT_7	AAGTTCGTCTCTTCAA-1	adlib	ad_libitum_fed	Singlet	neuron	magnaclass1	0	0	0	0	0	0	0	0	0	0	0	0		0	0	1	29	52	1	53	0	0	0	0	yes
adlib_Sample_3893_AT_7	AATAGAGAGATTCGCT-1	adlib	ad_libitum_fed	Singlet	neuron	magnaclass2	0	0	0	0	0	0	0	0	0	0	1	0		1	69	0	0	0	0	0	0	0	0	0	no
adlib_Sample_3893_AT_7	AATAGAGAGCCACAAG-1	adlib	ad_libitum_fed	Singlet	neuron	Lhx2_class	0	0	0	0	1	40	0	0	0	0	0	0		0	0	0	0	0	0	0	0	0	0	0	no
adlib_Sample_3893_AT_7	AATAGAGAGGTGGGTT-1	adlib	ad_libitum_fed	Singlet	neuron	magnaclass2	0	0	0	0	0	0	0	0	0	0	0	0		0	0	1	0	38	0	0	0	0	0	0	no
adlib_Sample_3893_AT_7	AATAGAGAGTGTCATC-1	adlib	ad_libitum_fed	Singlet	neuron	monoamine_class	0	0	0	0	0	0	0	0	0	0	0	0		0	0	0	0	0	0	0	0	0	0	0	no
adlib_Sample_3893_AT_7	AATCACGCAATTGGTC-1	adlib	ad_libitum_fed	Singlet	neuron	magnaclass1	0	0	0	0	0	0	0	0	0	0	1	0		1	92	1	48	70	1	35	0	0	0	0	yes
adlib_Sample_3893_AT_7	AATCACGGTACCTAAC-1	adlib	ad_libitum_fed	Singlet	neuron	magnaclass2	0	0	0	0	0	0	0	0	0	0	0	0		0	0	0	0	0	0	0	0	0	0	0	no
adlib_Sample_3893_AT_7	AATCACGTCCTCAGGG-1	adlib	ad_libitum_fed	Singlet	neuron	magnaclass2	0	0	0	0	0	0	0	0	0	0	1	0		1	6	0	0	0	0	0	0	0	0	0	no
adlib_Sample_3893_AT_7	AATCGACAGACTCAAA-1	adlib	ad_libitum_fed	Singlet	neuron	magnaclass1	0	0	0	0	0	0	0	0	0	0	0	0		0	0	1	0	87	0	0	0	0	0	0	no
adlib_Sample_3893_AT_7	AATCGACCAACTTGGT-1	adlib	ad_libitum_fed	Singlet	neuron	Lrmda_class	0	0	0	0	0	0	0	0	0	0	1	0		1	23	0	0	0	1	10	0	0	0	0	yes
adlib_Sample_3893_AT_7	AATCGACCACCAGCGT-1	adlib	ad_libitum_fed	Singlet	neuron	magnaclass2	0	0	0	0	0	0	0	0	0	0	1	0		1	64	0	0	0	0	0	0	0	0	0	no
adlib_Sample_3893_AT_7	AATCGACCACTGCGAC-1	adlib	ad_libitum_fed	Singlet	neuron	magnaclass2	0	0	0	0	0	0	0	0	0	0	1	0		1	81	0	0	0	0	0	0	0	0	0	no
adlib_Sample_3893_AT_7	AATCGACGTAAGCAAT-1	adlib	ad_libitum_fed	Singlet	neuron	magnaclass1	0	0	0	0	0	0	0	0	0	0	0	0		0	0	1	0	53	0	0	0	0	0	0	no
adlib_Sample_3893_AT_7	AATCGACGTCCAGTTA-1	adlib	ad_libitum_fed	Singlet	neuron	magnaclass1	0	0	0	0	0	0	0	0	0	0	0	0		0	0	1	0	91	0	0	0	0	1	62	yes
adlib_Sample_3893_AT_7	AATCGACTCAACTGGT-1	adlib	ad_libitum_fed	Singlet	neuron	magnaclass2	0	0	0	0	0	0	0	0	0	0	0	0		0	0	0	0	0	0	0	0	0	0	0	no
adlib_Sample_3893_AT_7	AATCGACTCATTTGGG-1	adlib	ad_libitum_fed	Singlet	neuron	Lhx2_class	0	0	0	0	0	0	0	0	0	0	0	0		0	0	0	0	0	0	0	0	0	0	0	no
adlib_Sample_3893_AT_7	AATCGTGAGATCGCCC-1	adlib	ad_libitum_fed	Singlet	neuron	magnaclass2	0	0	0	0	0	0	0	0	0	0	1	0		1	17	1	0	9	0	0	0	0	0	0	yes
adlib_Sample_3893_AT_7	AATCGTGAGCAAGCCA-1	adlib	ad_libitum_fed	Singlet	neuron	magnaclass2	0	0	0	0	1	86	0	0	0	0	0	0		0	0	0	0	0	0	0	0	0	0	0	no
adlib_Sample_3893_AT_7	AATCGTGGTAACACGG-1	adlib	ad_libitum_fed	Singlet	neuron	Sall3_class	0	0	0	0	1	75	0	0	0	0	1	0		1	59	1	0	34	0	0	0	0	0	0	yes
adlib_Sample_3893_AT_7	AATCGTGGTACTCGCG-1	adlib	ad_libitum_fed	Singlet	neuron	Lhx2_class	0	0	0	0	0	0	0	0	0	0	1	0		1	73	0	0	0	0	0	0	0	0	0	no
adlib_Sample_3893_AT_7	AATCGTGGTCACTCGG-1	adlib	ad_libitum_fed	Singlet	neuron	magnaclass2	0	0	0	0	0	0	0	0	0	0	0	0		0	0	0	0	0	0	0	0	0	0	0	no
adlib_Sample_3893_AT_7	AATCGTGTCGGCTTGG-1	adlib	ad_libitum_fed	Singlet	neuron	magnaclass2	0	0	0	0	0	0	0	0	0	0	1	0		1	81	0	0	0	0	0	1	42	1	90	yes
adlib_Sample_3893_AT_7	AATGAAGAGTAGAATC-1	adlib	ad_libitum_fed	Singlet	neuron	Sall3_class	0	0	0	0	0	0	0	0	0	0	0	0		0	0	1	0	65	1	87	0	0	1	51	yes
adlib_Sample_3893_AT_7	AATGAAGAGTTAACGA-1	adlib	ad_libitum_fed	Singlet	neuron	Sall3_class	0	0	0	0	0	0	0	0	0	0	0	0		0	0	1	0	73	1	20	1	86	0	0	yes
adlib_Sample_3893_AT_7	AATGAAGGTAGTAAGT-1	adlib	ad_libitum_fed	Singlet	neuron	magnaclass2	0	0	0	0	1	64	0	0	0	0	1	0		1	45	0	0	0	0	0	0	0	0	0	yes
adlib_Sample_3893_AT_7	AATGAAGGTCATGACT-1	adlib	ad_libitum_fed	Singlet	neuron	monoamine_class	0	0	0	0	0	0	0	0	0	0	0	0		0	0	0	0	0	0	0	1	25	0	0	no
adlib_Sample_3893_AT_7	AATGAAGTCAGGAGAC-1	adlib	ad_libitum_fed	Singlet	neuron	magnaclass1	0	0	0	0	0	0	0	0	0	0	0	0		0	0	0	0	0	0	0	1	56	0	0	no
adlib_Sample_3893_AT_7	AATGAAGTCCCGTTCA-1	adlib	ad_libitum_fed	Singlet	neuron	magnaclass2	0	0	0	0	1	14	0	0	1	14	1	0		1	3	0	0	0	0	0	1	7	0	0	yes
adlib_Sample_3893_AT_7	AATGAAGTCGTCAAAC-1	adlib	ad_libitum_fed	Singlet	neuron	magnaclass1	0	0	0	0	0	0	0	0	0	0	0	0		0	0	0	0	0	1	79	0	0	0	0	no
adlib_Sample_3893_AT_7	AATGACCCAAACCATC-1	adlib	ad_libitum_fed	Singlet	neuron	Lhx2_class	0	0	0	0	1	21	0	0	0	0	1	0		1	6	0	0	0	0	0	1	10	0	0	yes
adlib_Sample_3893_AT_7	AATGACCCACCCTAAA-1	adlib	ad_libitum_fed	Singlet	neuron	magnaclass2	0	0	0	0	0	0	0	0	0	0	1	0		1	34	0	0	0	0	0	0	0	0	0	no
adlib_Sample_3893_AT_7	AATGACCGTACGTGAG-1	adlib	ad_libitum_fed	Singlet	neuron	magnaclass2	0	0	0	0	0	0	0	0	0	0	1	0		1	10	0	0	0	0	0	1	16	1	14	yes
adlib_Sample_3893_AT_7	AATGCCAAGACTTCAC-1	adlib	ad_libitum_fed	Singlet	neuron	magnaclass1	0	0	0	0	0	0	0	0	0	0	1	0		1	17	1	14	78	0	0	0	0	0	0	yes
adlib_Sample_3893_AT_7	AATGCCAAGTCGAAGC-1	adlib	ad_libitum_fed	Singlet	neuron	magnaclass2	0	0	0	0	0	0	0	0	0	0	0	0		0	0	0	0	0	0	0	0	0	0	0	no
adlib_Sample_3893_AT_7	AATGCCACACGGTAGA-1	adlib	ad_libitum_fed	Singlet	neuron	Lhx2_class	0	0	0	0	0	0	0	0	0	0	1	0		1	43	0	0	0	0	0	0	0	1	42	yes
adlib_Sample_3893_AT_7	AATGCCAGTCTTCATT-1	adlib	ad_libitum_fed	Singlet	neuron	magnaclass2	0	0	0	0	1	44	0	0	0	0	1	0		1	64	0	0	0	0	0	0	0	0	0	yes
adlib_Sample_3893_AT_7	AATGCCATCCATTTGT-1	adlib	ad_libitum_fed	Singlet	neuron	magnaclass2	0	0	0	0	0	0	0	0	0	0	1	0		1	79	0	0	0	0	0	0	0	0	0	no
adlib_Sample_3893_AT_7	AATGGAACATGCGTGC-1	adlib	ad_libitum_fed	Singlet	neuron	monoamine_class	0	0	0	0	0	0	0	0	0	0	0	0		0	0	0	0	0	0	0	0	0	0	0	no
adlib_Sample_3893_AT_7	AATGGAAGTGTGCTTA-1	adlib	ad_libitum_fed	Singlet	neuron	Lrmda_class	0	0	0	0	0	0	0	0	0	0	0	0		0	0	1	0	17	0	0	0	0	0	0	no
adlib_Sample_3893_AT_7	AATGGAATCGGTCACG-1	adlib	ad_libitum_fed	Singlet	neuron	magnaclass1	0	0	0	0	0	0	0	0	0	0	0	0		0	0	0	0	0	1	86	0	0	0	0	no
adlib_Sample_3893_AT_7	AATGGAATCGTCGACG-1	adlib	ad_libitum_fed	Singlet	neuron	Sall3_class	0	0	0	0	0	0	0	0	0	0	1	0		1	59	1	46	69	1	34	0	0	0	0	yes
adlib_Sample_3893_AT_7	AATGGAATCTCGGGAC-1	adlib	ad_libitum_fed	Singlet	neuron	magnaclass2	0	0	0	0	0	0	0	0	0	0	1	0		1	53	0	0	0	0	0	0	0	0	0	no
adlib_Sample_3893_AT_7	AATGGCTAGCTTACGT-1	adlib	ad_libitum_fed	Singlet	neuron	magnaclass1	0	0	0	0	0	0	0	0	0	0	0	0		0	0	1	45	85	0	0	0	0	0	0	no
adlib_Sample_3893_AT_7	AATGGCTTCGGTATGT-1	adlib	ad_libitum_fed	Singlet	neuron	magnaclass2	0	0	0	0	0	0	0	0	0	0	0	0		0	0	0	0	0	0	0	0	0	0	0	no
adlib_Sample_3893_AT_7	AATTCCTAGGGTGAGG-1	adlib	ad_libitum_fed	Singlet	neuron	magnaclass2	0	0	0	0	0	0	0	0	0	0	0	0		0	0	0	0	0	0	0	0	0	0	0	no
adlib_Sample_3893_AT_7	AATTCCTGTGACTCGC-1	adlib	ad_libitum_fed	Singlet	neuron	corelautus_class	0	0	0	0	0	0	0	0	0	0	0	0		0	0	0	0	0	0	0	0	0	0	0	no
adlib_Sample_3893_AT_7	AATTCCTTCAGACTGT-1	adlib	ad_libitum_fed	Singlet	neuron	magnaclass2	0	0	1	8	0	0	0	0	0	0	1	0		1	59	0	0	0	0	0	0	0	0	0	yes
adlib_Sample_3893_AT_7	AATTCCTTCCATCTGC-1	adlib	ad_libitum_fed	Singlet	neuron	Lhx2_class	0	0	0	0	1	72	0	0	0	0	1	0		1	89	0	0	0	0	0	0	0	0	0	yes
adlib_Sample_3893_AT_7	AATTTCCAGAGCCTGA-1	adlib	ad_libitum_fed	Singlet	neuron	magnaclass1	0	0	0	0	1	77	0	0	0	0	0	0		0	0	1	84	37	0	0	0	0	0	0	yes
adlib_Sample_3893_AT_7	AATTTCCAGGCACCAA-1	adlib	ad_libitum_fed	Singlet	neuron	magnaclass1	0	0	0	0	0	0	0	0	0	0	0	0		0	0	0	0	0	0	0	0	0	0	0	no
adlib_Sample_3893_AT_7	AATTTCCAGGGCATGT-1	adlib	ad_libitum_fed	Singlet	neuron	Lrmda_class	0	0	0	0	0	0	0	0	0	0	1	0		1	11	0	0	0	0	0	0	0	0	0	no
adlib_Sample_3893_AT_7	AATTTCCCACAGTCAT-1	adlib	ad_libitum_fed	Singlet	neuron	magnaclass2	0	0	0	0	0	0	0	0	0	0	1	0		1	68	0	0	0	0	0	0	0	0	0	no
adlib_Sample_3893_AT_7	AATTTCCTCACGGGAA-1	adlib	ad_libitum_fed	Singlet	neuron	magnaclass2	0	0	0	0	0	0	0	0	0	0	1	0		1	44	0	0	0	0	0	0	0	0	0	no
adlib_Sample_3893_AT_7	ACAAAGAAGTAGCCAG-1	adlib	ad_libitum_fed	Singlet	neuron	Lhx2_class	0	0	0	0	0	0	0	0	0	0	1	0		1	85	0	0	0	0	0	0	0	0	0	no
adlib_Sample_3893_AT_7	ACAAAGATCTTCTCAA-1	adlib	ad_libitum_fed	Singlet	neuron	magnaclass2	0	0	0	0	0	0	0	0	0	0	0	0		0	0	1	12	88	1	50	0	0	0	0	yes
adlib_Sample_3893_AT_7	ACAACCAGTGACTCTA-1	adlib	ad_libitum_fed	Singlet	neuron	magnaclass1	0	0	0	0	0	0	0	0	0	0	1	0		1	48	1	0	7	0	0	0	0	0	0	yes
adlib_Sample_3893_AT_7	ACAACCAGTGAGCCAA-1	adlib	ad_libitum_fed	Singlet	neuron	magnaclass1	0	0	0	0	0	0	0	0	0	0	0	0		0	0	1	68	0	1	55	0	0	0	0	yes
adlib_Sample_3893_AT_7	ACAACCATCATTTACC-1	adlib	ad_libitum_fed	Singlet	neuron	magnaclass1	0	0	0	0	1	66	0	0	0	0	1	0		1	85	1	0	59	1	62	0	0	0	0	yes
adlib_Sample_3893_AT_7	ACAACCATCCCATTCG-1	adlib	ad_libitum_fed	Singlet	neuron	Lhx2_class	0	0	0	0	0	0	0	0	0	0	0	0		0	0	1	62	0	0	0	0	0	0	0	no
adlib_Sample_3893_AT_7	ACAACCATCGCGTGAC-1	adlib	ad_libitum_fed	Singlet	neuron	magnaclass1	0	0	0	0	1	69	0	0	0	0	0	0		0	0	1	91	28	1	65	1	80	0	0	yes
adlib_Sample_3893_AT_7	ACAAGCTCAATAGGAT-1	adlib	ad_libitum_fed	Singlet	neuron	magnaclass1	0	0	0	0	1	86	0	0	0	0	0	0		0	0	1	65	0	0	0	0	0	0	0	yes
adlib_Sample_3893_AT_7	ACAAGCTCACTCACTC-1	adlib	ad_libitum_fed	Singlet	neuron	magnaclass1	0	0	0	0	0	0	0	0	0	0	0	0		0	0	1	0	30	0	0	0	0	0	0	no
adlib_Sample_3893_AT_7	ACACAGTAGAGCACTG-1	adlib	ad_libitum_fed	Singlet	neuron	magnaclass2	0	0	0	0	0	0	0	0	0	0	0	0		0	0	1	0	18	0	0	0	0	0	0	no
adlib_Sample_3893_AT_7	ACACAGTAGGATTTCC-1	adlib	ad_libitum_fed	Singlet	neuron	Sall3_class	0	0	0	0	0	0	0	0	0	0	0	0		0	0	1	7	21	1	55	0	0	0	0	yes
adlib_Sample_3893_AT_7	ACACAGTCACAGGATG-1	adlib	ad_libitum_fed	Singlet	neuron	magnaclass2	0	0	0	0	0	0	0	0	0	0	0	0		0	0	0	0	0	0	0	0	0	0	0	no
adlib_Sample_3893_AT_7	ACACAGTTCAAGAAAC-1	adlib	ad_libitum_fed	Singlet	neuron	monoamine_class	1	12	1	92	0	0	0	0	0	0	1	1		1	10	0	0	0	0	0	0	0	0	0	yes
adlib_Sample_3893_AT_7	ACACAGTTCGGACGTC-1	adlib	ad_libitum_fed	Singlet	neuron	Lrmda_class	0	0	0	0	0	0	0	0	0	0	0	0		0	0	0	0	0	0	0	0	0	0	0	no
adlib_Sample_3893_AT_7	ACACCAAAGGTACAAT-1	adlib	ad_libitum_fed	Singlet	neuron	magnaclass2	0	0	0	0	0	0	0	0	0	0	1	0		1	43	0	0	0	0	0	0	0	0	0	no
adlib_Sample_3893_AT_7	ACACCAACACATGGTT-1	adlib	ad_libitum_fed	Singlet	neuron	Lrmda_class	0	0	0	0	0	0	0	0	0	0	0	0		0	0	1	0	52	1	4	0	0	0	0	yes
adlib_Sample_3893_AT_7	ACACCAACACGGTCTG-1	adlib	ad_libitum_fed	Singlet	neuron	magnaclass1	0	0	0	0	0	0	0	0	0	0	1	1		0	0	1	0	52	1	41	0	0	0	0	yes
adlib_Sample_3893_AT_7	ACACCAAGTCACGTGC-1	adlib	ad_libitum_fed	Singlet	neuron	magnaclass2	0	0	0	0	0	0	0	0	0	0	1	0		1	21	0	0	0	0	0	0	0	0	0	no
adlib_Sample_3893_AT_7	ACACCAATCAACGCTA-1	adlib	ad_libitum_fed	Singlet	neuron	Lhx2_class	0	0	0	0	0	0	0	0	0	0	0	0		0	0	0	0	0	0	0	0	0	0	0	no
adlib_Sample_3893_AT_7	ACACGCGAGCGGATCA-1	adlib	ad_libitum_fed	Singlet	neuron	magnaclass1	0	0	0	0	1	95	0	0	0	0	0	0		0	0	1	0	93	1	48	0	0	0	0	yes
adlib_Sample_3893_AT_7	ACACGCGGTCCAGTTA-1	adlib	ad_libitum_fed	Singlet	neuron	magnaclass1	0	0	0	0	0	0	0	0	0	0	0	0		0	0	1	16	0	1	9	0	0	1	91	yes
adlib_Sample_3893_AT_7	ACACGCGGTGCCTTCT-1	adlib	ad_libitum_fed	Singlet	neuron	magnaclass1	0	0	0	0	0	0	0	0	0	0	1	0		1	58	1	45	16	1	48	0	0	0	0	yes
adlib_Sample_3893_AT_7	ACACGCGTCGCTAAAC-1	adlib	ad_libitum_fed	Singlet	neuron	magnaclass2	0	0	0	0	0	0	0	0	0	0	0	0		0	0	0	0	0	0	0	0	0	0	0	no
adlib_Sample_3893_AT_7	ACACTGAAGTGAGGTC-1	adlib	ad_libitum_fed	Singlet	neuron	Lrmda_class	0	0	0	0	0	0	0	0	0	0	1	0		1	58	1	0	93	0	0	0	0	0	0	yes
adlib_Sample_3893_AT_7	ACACTGAGTCATAAAG-1	adlib	ad_libitum_fed	Singlet	neuron	magnaclass1	1	80	0	0	0	0	0	0	0	0	1	0		1	39	1	68	99	1	20	0	0	0	0	yes
adlib_Sample_3893_AT_7	ACACTGAGTGTACAGG-1	adlib	ad_libitum_fed	Singlet	neuron	monoamine_class	0	0	0	0	0	0	0	0	0	0	0	0		0	0	0	0	0	0	0	0	0	0	0	no
adlib_Sample_3893_AT_7	ACACTGAGTGTACGCC-1	adlib	ad_libitum_fed	Singlet	neuron	magnaclass2	0	0	0	0	0	0	0	0	0	0	1	0		1	72	0	0	0	0	0	0	0	0	0	no
adlib_Sample_3893_AT_7	ACAGAAAAGTAGAGTT-1	adlib	ad_libitum_fed	Singlet	neuron	Golli_class	0	0	0	0	1	91	0	0	0	0	0	0		0	0	1	77	0	0	0	0	0	0	0	yes
adlib_Sample_3893_AT_7	ACAGAAACAACCGTAT-1	adlib	ad_libitum_fed	Singlet	neuron	magnaclass2	0	0	1	59	0	0	0	0	0	0	0	0		0	0	0	0	0	0	0	0	0	0	0	no
adlib_Sample_3893_AT_7	ACAGAAACACTGGAAG-1	adlib	ad_libitum_fed	Singlet	neuron	magnaclass1	0	0	0	0	0	0	0	0	0	0	1	0		1	46	1	36	78	0	0	0	0	0	0	yes
adlib_Sample_3893_AT_7	ACAGAAACAGACGATG-1	adlib	ad_libitum_fed	Singlet	neuron	magnaclass2	0	0	0	0	0	0	0	0	0	0	0	0		0	0	0	0	0	0	0	0	0	0	0	no
adlib_Sample_3893_AT_7	ACAGAAAGTTTAGACC-1	adlib	ad_libitum_fed	Singlet	neuron	magnaclass1	0	0	0	0	0	0	0	0	0	0	1	0		1	39	1	0	52	1	19	0	0	0	0	yes
adlib_Sample_3893_AT_7	ACAGCCGAGCCGTAAG-1	adlib	ad_libitum_fed	Singlet	neuron	monoamine_class	0	0	0	0	0	0	0	0	0	0	1	0		1	52	0	0	0	0	0	0	0	0	0	no
adlib_Sample_3893_AT_7	ACAGCCGAGGTCATTC-1	adlib	ad_libitum_fed	Singlet	neuron	magnaclass1	0	0	0	0	0	0	0	0	0	0	1	0		1	31	0	0	0	0	0	1	69	1	66	yes
adlib_Sample_3893_AT_7	ACAGCCGAGGTGCCTC-1	adlib	ad_libitum_fed	Singlet	neuron	monoamine_class	0	0	0	0	0	0	0	0	0	0	1	0		1	78	0	0	0	0	0	0	0	0	0	no
adlib_Sample_3893_AT_7	ACAGCCGCACTGGCCA-1	adlib	ad_libitum_fed	Singlet	neuron	magnaclass1	0	0	0	0	0	0	0	0	0	0	0	0		0	0	1	99	82	0	0	0	0	0	0	no
adlib_Sample_3893_AT_7	ACAGCCGTCGGAAGGT-1	adlib	ad_libitum_fed	Singlet	neuron	magnaclass2	0	0	0	0	0	0	0	0	0	0	0	0		0	0	1	0	73	0	0	0	0	0	0	no
adlib_Sample_3893_AT_7	ACAGGGAGTTTGTGGT-1	adlib	ad_libitum_fed	Singlet	neuron	Lhx2_class	0	0	0	0	0	0	0	0	0	0	0	0		0	0	0	0	0	0	0	0	0	0	0	no
adlib_Sample_3893_AT_7	ACAGGGATCAGCCTTC-1	adlib	ad_libitum_fed	Singlet	neuron	magnaclass1	0	0	0	0	0	0	0	0	0	0	0	0		0	0	1	66	95	1	87	0	0	1	70	yes
adlib_Sample_3893_AT_7	ACATCCCCATGCCGCA-1	adlib	ad_libitum_fed	Singlet	neuron	Lhx2_class	0	0	0	0	0	0	0	0	0	0	0	0		0	0	0	0	0	0	0	0	0	0	0	no
adlib_Sample_3893_AT_7	ACATCCCGTCGTGTTA-1	adlib	ad_libitum_fed	Singlet	neuron	Lrmda_class	0	0	0	0	0	0	0	0	0	0	1	0		1	91	0	0	0	1	72	0	0	0	0	yes
adlib_Sample_3893_AT_7	ACATCCCGTCTGTAAC-1	adlib	ad_libitum_fed	Singlet	neuron	magnaclass2	0	0	0	0	0	0	0	0	0	0	1	0		1	93	1	0	20	0	0	0	0	0	0	yes
adlib_Sample_3893_AT_7	ACATCCCGTGCATGTT-1	adlib	ad_libitum_fed	Singlet	neuron	magnaclass1	0	0	0	0	1	22	0	0	0	0	1	0		1	77	1	6	49	1	17	0	0	0	0	yes
adlib_Sample_3893_AT_7	ACATCGAAGGTTGAGC-1	adlib	ad_libitum_fed	Singlet	neuron	magnaclass2	0	0	0	0	0	0	0	0	0	0	1	0		1	77	0	0	0	0	0	0	0	0	0	no
adlib_Sample_3893_AT_7	ACATCGAAGGTTGGAC-1	adlib	ad_libitum_fed	Singlet	neuron	monoamine_class	0	0	0	0	0	0	0	0	0	0	1	0		1	71	1	0	43	0	0	0	0	0	0	yes
adlib_Sample_3893_AT_7	ACATCGACAATTTCCT-1	adlib	ad_libitum_fed	Singlet	neuron	Lrmda_class	0	0	0	0	0	0	0	0	0	0	1	0		1	55	1	0	8	0	0	1	55	0	0	yes
adlib_Sample_3893_AT_7	ACATCGAGTAGACGGT-1	adlib	ad_libitum_fed	Singlet	neuron	magnaclass2	0	0	0	0	0	0	0	0	0	0	0	0		0	0	0	0	0	0	0	0	0	0	0	no
adlib_Sample_3893_AT_7	ACATCGAGTGGCATCC-1	adlib	ad_libitum_fed	Singlet	neuron	Lrmda_class	0	0	0	0	0	0	0	0	0	0	1	0		1	18	1	46	53	1	33	0	0	0	0	yes
adlib_Sample_3893_AT_7	ACATCGATCCCATAAG-1	adlib	ad_libitum_fed	Singlet	neuron	monoamine_class	0	0	0	0	0	0	0	0	0	0	0	0		0	0	1	0	95	0	0	0	0	0	0	no
adlib_Sample_3893_AT_7	ACATCGATCTACTCAT-1	adlib	ad_libitum_fed	Singlet	neuron	magnaclass2	0	0	0	0	0	0	0	0	0	0	1	0		1	18	0	0	0	0	0	0	0	0	0	no
adlib_Sample_3893_AT_7	ACATCGATCTTGCGCT-1	adlib	ad_libitum_fed	Singlet	neuron	magnaclass1	0	0	0	0	0	0	0	0	0	0	0	0		0	0	1	0	83	0	0	0	0	0	0	no
adlib_Sample_3893_AT_7	ACATGCAAGGTGAGAA-1	adlib	ad_libitum_fed	Singlet	neuron	magnaclass1	0	0	0	0	1	85	0	0	0	0	1	0		1	76	0	0	0	0	0	0	0	1	68	yes
adlib_Sample_3893_AT_7	ACATGCACAAGGTCGA-1	adlib	ad_libitum_fed	Singlet	neuron	monoamine_class	0	0	0	0	0	0	0	0	0	0	0	0		0	0	0	0	0	0	0	0	0	0	0	no
adlib_Sample_3893_AT_7	ACATGCACACACTGGC-1	adlib	ad_libitum_fed	Singlet	neuron	magnaclass1	0	0	0	0	0	0	0	0	0	0	1	0		1	21	1	50	57	0	0	0	0	0	0	yes
adlib_Sample_3893_AT_7	ACATGCACACTCAGAT-1	adlib	ad_libitum_fed	Singlet	neuron	magnaclass1	0	0	0	0	0	0	0	0	0	0	1	0		1	41	1	69	54	0	0	0	0	0	0	yes
adlib_Sample_3893_AT_7	ACATGCATCCCGAGTG-1	adlib	ad_libitum_fed	Singlet	neuron	Sall3_class	0	0	0	0	0	0	0	0	0	0	1	0		1	99	0	0	0	1	87	0	0	0	0	yes
adlib_Sample_3893_AT_7	ACATGCATCCGGTAGC-1	adlib	ad_libitum_fed	Singlet	neuron	Lhx2_class	0	0	0	0	0	0	0	0	0	0	0	0		0	0	0	0	0	0	0	0	0	0	0	no
adlib_Sample_3893_AT_7	ACATTTCAGGAACGTC-1	adlib	ad_libitum_fed	Singlet	neuron	magnaclass1	0	0	0	0	0	0	0	0	0	0	1	0		1	15	1	0	8	1	51	1	21	0	0	yes
adlib_Sample_3893_AT_7	ACATTTCCATCATGAC-1	adlib	ad_libitum_fed	Singlet	neuron	Sall3_class	0	0	0	0	1	17	0	0	0	0	1	0		1	27	1	4	0	1	56	1	75	0	0	yes
adlib_Sample_3893_AT_7	ACATTTCGTACAAAGT-1	adlib	ad_libitum_fed	Singlet	neuron	Sall3_class	0	0	0	0	0	0	0	0	0	0	0	0		0	0	0	0	0	1	20	0	0	0	0	no
adlib_Sample_3893_AT_7	ACATTTCGTATGAGGC-1	adlib	ad_libitum_fed	Singlet	neuron	Sall3_class	0	0	0	0	0	0	0	0	0	0	0	0		0	0	1	55	0	1	12	0	0	0	0	yes
adlib_Sample_3893_AT_7	ACATTTCGTGTTCAGT-1	adlib	ad_libitum_fed	Singlet	neuron	magnaclass2	0	0	0	0	0	0	0	0	0	0	0	0		0	0	0	0	0	0	0	0	0	0	0	no
adlib_Sample_3893_AT_7	ACCAAACAGGCTAGCA-1	adlib	ad_libitum_fed	Singlet	neuron	magnaclass1	0	0	0	0	0	0	0	0	0	0	1	0		1	27	1	21	0	1	13	0	0	0	0	yes
adlib_Sample_3893_AT_7	ACCAAACCAACATCGT-1	adlib	ad_libitum_fed	Singlet	neuron	magnaclass1	0	0	0	0	1	18	0	0	0	0	1	0		1	28	1	69	55	1	57	0	0	0	0	yes
adlib_Sample_3893_AT_7	ACCAAACCAGGACTTT-1	adlib	ad_libitum_fed	Singlet	neuron	Lhx2_class	0	0	0	0	0	0	0	0	0	0	0	0		0	0	0	0	0	0	0	0	0	0	0	no
adlib_Sample_3893_AT_7	ACCAAACTCCTCACGT-1	adlib	ad_libitum_fed	Singlet	neuron	Lhx2_class	0	0	0	0	0	0	0	0	0	0	0	0		0	0	0	0	0	0	0	0	0	0	0	no
adlib_Sample_3893_AT_7	ACCAACAAGAAGCTCG-1	adlib	ad_libitum_fed	Singlet	neuron	Sall3_class	0	0	0	0	0	0	0	0	0	0	1	0		1	52	1	77	0	0	0	0	0	0	0	yes
adlib_Sample_3893_AT_7	ACCAACAAGCATTTCG-1	adlib	ad_libitum_fed	Singlet	neuron	Lhx2_class	0	0	1	13	0	0	0	0	0	0	1	0		1	11	0	0	0	0	0	0	0	0	0	yes
adlib_Sample_3893_AT_7	ACCAACAAGCGACTGA-1	adlib	ad_libitum_fed	Singlet	neuron	magnaclass1	0	0	0	0	0	0	0	0	0	0	0	0		0	0	0	0	0	1	84	0	0	0	0	no
adlib_Sample_3893_AT_7	ACCAACACACTGGCCA-1	adlib	ad_libitum_fed	Singlet	neuron	Lrmda_class	0	0	0	0	0	0	0	0	0	0	1	0		1	34	0	0	0	0	0	0	0	1	68	yes
adlib_Sample_3893_AT_7	ACCAACACAGTCAGTT-1	adlib	ad_libitum_fed	Singlet	neuron	monoamine_class	0	0	0	0	0	0	0	0	0	0	1	0		1	20	0	0	0	0	0	1	26	0	0	yes
adlib_Sample_3893_AT_7	ACCAACAGTTCCATTT-1	adlib	ad_libitum_fed	Singlet	neuron	magnaclass2	0	0	0	0	1	6	0	0	0	0	1	0		1	10	1	0	6	0	0	0	0	0	0	yes
adlib_Sample_3893_AT_7	ACCAACATCGACACTA-1	adlib	ad_libitum_fed	Singlet	neuron	Sall3_class	0	0	0	0	0	0	0	0	0	0	0	0		0	0	1	57	42	1	43	0	0	1	30	yes
adlib_Sample_3893_AT_7	ACCACAAAGGTATTGA-1	adlib	ad_libitum_fed	Singlet	neuron	magnaclass2	0	0	0	0	0	0	0	0	0	0	0	0		0	0	0	0	0	0	0	0	0	0	0	no
adlib_Sample_3893_AT_7	ACCACAACAGCCGTTG-1	adlib	ad_libitum_fed	Singlet	neuron	magnaclass2	0	0	0	0	0	0	0	0	0	0	1	0		1	41	0	0	0	0	0	0	0	0	0	no
adlib_Sample_3893_AT_7	ACCACAAGTACTCGAT-1	adlib	ad_libitum_fed	Singlet	neuron	monoamine_class	0	0	0	0	0	0	0	0	0	0	0	0		0	0	0	0	0	0	0	0	0	0	0	no
adlib_Sample_3893_AT_7	ACCACAAGTGCCAAGA-1	adlib	ad_libitum_fed	Singlet	neuron	Sall3_class	0	0	0	0	0	0	0	0	0	0	0	0		0	0	1	0	13	1	78	0	0	0	0	yes
adlib_Sample_3893_AT_7	ACCATTTCAGGTCCCA-1	adlib	ad_libitum_fed	Singlet	neuron	Sall3_class	0	0	0	0	0	0	0	0	0	0	1	0		1	53	1	91	75	1	78	0	0	0	0	yes
adlib_Sample_3893_AT_7	ACCATTTCATCGGTTA-1	adlib	ad_libitum_fed	Singlet	neuron	Sall3_class	0	0	0	0	0	0	0	0	0	0	0	0		0	0	1	0	74	1	62	0	0	0	0	yes
adlib_Sample_3893_AT_7	ACCATTTGTACCTAAC-1	adlib	ad_libitum_fed	Singlet	neuron	monoamine_class	0	0	1	13	0	0	0	0	0	0	0	0		0	0	0	0	0	0	0	0	0	0	0	no
adlib_Sample_3893_AT_7	ACCATTTGTCATTCCC-1	adlib	ad_libitum_fed	Singlet	neuron	Lhx2_class	0	0	0	0	0	0	0	0	0	0	0	0		0	0	0	0	0	0	0	0	0	0	0	no
adlib_Sample_3893_AT_7	ACCATTTTCAGCTGAT-1	adlib	ad_libitum_fed	Singlet	neuron	magnaclass2	0	0	0	0	0	0	0	0	0	0	0	0		0	0	0	0	0	1	67	0	0	0	0	no
adlib_Sample_3893_AT_7	ACCCAAAAGTATCTGC-1	adlib	ad_libitum_fed	Singlet	neuron	Lhx2_class	0	0	0	0	0	0	0	0	0	0	1	0		1	31	1	0	16	0	0	0	0	0	0	yes
adlib_Sample_3893_AT_7	ACCCAAACACACGGAA-1	adlib	ad_libitum_fed	Singlet	neuron	Sall3_class	0	0	0	0	1	57	0	0	0	0	1	1		1	78	0	0	0	1	18	1	72	1	37	yes
adlib_Sample_3893_AT_7	ACCCAAACATAGCTGT-1	adlib	ad_libitum_fed	Singlet	neuron	magnaclass1	0	0	0	0	0	0	0	0	0	0	0	0		0	0	0	0	0	0	0	1	91	0	0	no
adlib_Sample_3893_AT_7	ACCCAAATCGTTCTCG-1	adlib	ad_libitum_fed	Singlet	neuron	magnaclass2	0	0	0	0	0	0	0	0	0	0	0	0		0	0	0	0	0	0	0	0	0	0	0	no
adlib_Sample_3893_AT_7	ACCCTCAAGCTAGAAT-1	adlib	ad_libitum_fed	Singlet	neuron	Lhx2_class	0	0	0	0	0	0	0	0	0	0	1	0		1	75	0	0	0	0	0	0	0	0	0	no
adlib_Sample_3893_AT_7	ACCCTCACACGCTGAC-1	adlib	ad_libitum_fed	Singlet	neuron	magnaclass1	0	0	0	0	0	0	0	0	0	0	0	0		0	0	1	34	0	0	0	0	0	0	0	no
adlib_Sample_3893_AT_7	ACCCTCACAGAGTTGG-1	adlib	ad_libitum_fed	Singlet	neuron	magnaclass1	0	0	0	0	0	0	0	0	0	0	0	0		0	0	1	64	74	1	6	0	0	1	19	yes
adlib_Sample_3893_AT_7	ACCCTCATCTAGATCG-1	adlib	ad_libitum_fed	Singlet	neuron	magnaclass1	0	0	0	0	0	0	0	0	0	0	0	0		0	0	1	0	79	1	45	0	0	0	0	yes
adlib_Sample_3893_AT_7	ACCCTTGCATGGCCCA-1	adlib	ad_libitum_fed	Singlet	neuron	monoamine_class	0	0	0	0	0	0	0	0	0	0	1	0		1	48	0	0	0	0	0	0	0	0	0	no
adlib_Sample_3893_AT_7	ACCCTTGTCCACTTTA-1	adlib	ad_libitum_fed	Singlet	neuron	magnaclass1	0	0	0	0	0	0	0	0	0	0	1	0		1	25	1	54	40	1	87	0	0	0	0	yes
adlib_Sample_3893_AT_7	ACCCTTGTCCATCTCG-1	adlib	ad_libitum_fed	Singlet	neuron	monoamine_class	0	0	1	19	0	0	0	0	0	0	1	0		1	61	0	0	0	0	0	1	25	1	55	yes
adlib_Sample_3893_AT_7	ACCCTTGTCCCGAGGT-1	adlib	ad_libitum_fed	Singlet	neuron	magnaclass1	0	0	0	0	1	22	0	0	0	0	0	0		0	0	1	0	18	1	51	0	0	0	0	yes
adlib_Sample_3893_AT_7	ACCGTTCAGTACAGCG-1	adlib	ad_libitum_fed	Singlet	neuron	Lrmda_class	0	0	0	0	0	0	0	0	0	0	1	0		1	79	1	29	0	1	19	0	0	0	0	yes
adlib_Sample_3893_AT_7	ACCGTTCCAGGAGGTT-1	adlib	ad_libitum_fed	Singlet	neuron	magnaclass2	0	0	0	0	0	0	0	0	0	0	1	0		1	9	0	0	0	0	0	0	0	0	0	no
adlib_Sample_3893_AT_7	ACCGTTCTCGTCTCAC-1	adlib	ad_libitum_fed	Singlet	neuron	magnaclass1	0	0	0	0	0	0	0	0	0	0	0	0		0	0	1	86	0	0	0	0	0	0	0	no
adlib_Sample_3893_AT_7	ACCTACCAGGTTGGTG-1	adlib	ad_libitum_fed	Singlet	neuron	monoamine_class	0	0	0	0	0	0	0	0	0	0	0	0		0	0	0	0	0	0	0	0	0	1	92	no
adlib_Sample_3893_AT_7	ACCTACCCAATGAAAC-1	adlib	ad_libitum_fed	Singlet	neuron	Sall3_class	0	0	0	0	0	0	0	0	0	0	1	0		1	73	1	24	0	1	47	0	0	0	0	yes
adlib_Sample_3893_AT_7	ACCTACCGTACGAAAT-1	adlib	ad_libitum_fed	Singlet	neuron	magnaclass2	0	0	1	53	0	0	0	0	0	0	0	0		0	0	0	0	0	0	0	1	65	1	62	yes
adlib_Sample_3893_AT_7	ACCTGAAAGTCATCGT-1	adlib	ad_libitum_fed	Singlet	neuron	magnaclass2	0	0	0	0	0	0	0	0	0	0	0	0		0	0	0	0	0	0	0	0	0	0	0	no
adlib_Sample_3893_AT_7	ACCTGAACATCGTGCG-1	adlib	ad_libitum_fed	Singlet	neuron	magnaclass2	0	0	0	0	0	0	0	0	0	0	0	0		0	0	0	0	0	0	0	0	0	0	0	no
adlib_Sample_3893_AT_7	ACCTGAATCAGGCGAA-1	adlib	ad_libitum_fed	Singlet	neuron	magnaclass1	0	0	0	0	0	0	0	0	0	0	0	0		0	0	1	87	0	0	0	0	0	0	0	no
adlib_Sample_3893_AT_7	ACCTGTCAGTTCATGC-1	adlib	ad_libitum_fed	Singlet	neuron	Sall3_class	0	0	0	0	0	0	0	0	0	0	1	0		1	8	1	7	5	1	19	0	0	1	79	yes
adlib_Sample_3893_AT_7	ACGATCAAGCGACTTT-1	adlib	ad_libitum_fed	Singlet	neuron	Lrmda_class	0	0	0	0	0	0	0	0	0	0	1	0		1	44	1	71	23	1	23	1	46	1	43	yes
adlib_Sample_3893_AT_7	ACGATCACAATTTCCT-1	adlib	ad_libitum_fed	Singlet	neuron	magnaclass2	0	0	0	0	0	0	0	0	0	0	0	0		0	0	1	0	3	0	0	0	0	0	0	no
adlib_Sample_3893_AT_7	ACGATCACACCTCTGT-1	adlib	ad_libitum_fed	Singlet	neuron	magnaclass1	0	0	0	0	0	0	0	0	0	0	0	0		0	0	1	0	22	1	22	0	0	0	0	yes
adlib_Sample_3893_AT_7	ACGATGTTCAACTGAC-1	adlib	ad_libitum_fed	Singlet	neuron	Lrmda_class	0	0	0	0	0	0	0	0	0	0	1	0		1	6	1	0	4	0	0	0	0	0	0	yes
adlib_Sample_3893_AT_7	ACGATGTTCACATACG-1	adlib	ad_libitum_fed	Singlet	neuron	Lhx2_class	0	0	0	0	0	0	0	0	0	0	1	0		1	17	0	0	0	0	0	0	0	1	21	yes
adlib_Sample_3893_AT_7	ACGCACGGTCCTTTGC-1	adlib	ad_libitum_fed	Singlet	neuron	magnaclass2	0	0	0	0	0	0	0	0	0	0	1	0		1	38	0	0	0	0	0	0	0	0	0	no
adlib_Sample_3893_AT_7	ACGGAAGAGACGATAT-1	adlib	ad_libitum_fed	Singlet	neuron	magnaclass1	0	0	0	0	0	0	0	0	0	0	0	0		0	0	1	0	65	0	0	0	0	0	0	no
adlib_Sample_3893_AT_7	ACGGAAGAGGTAGCAC-1	adlib	ad_libitum_fed	Singlet	neuron	Sall3_class	0	0	0	0	0	0	0	0	0	0	0	0		0	0	0	0	0	1	67	0	0	0	0	no
adlib_Sample_3893_AT_7	ACGGAAGTCAAGGTGG-1	adlib	ad_libitum_fed	Singlet	neuron	monoamine_class	1	65	1	52	0	0	0	0	0	0	0	0		0	0	1	0	40	0	0	0	0	0	0	yes
adlib_Sample_3893_AT_7	ACGGGTCCAATACGCT-1	adlib	ad_libitum_fed	Singlet	neuron	Sall3_class	0	0	1	11	0	0	0	0	0	0	1	0		1	10	1	9	6	1	81	0	0	0	0	yes
adlib_Sample_3893_AT_7	ACGGGTCCATGAAAGT-1	adlib	ad_libitum_fed	Singlet	neuron	Lrmda_class	0	0	0	0	0	0	0	0	0	0	0	0		0	0	1	54	0	1	78	1	30	0	0	yes
adlib_Sample_3893_AT_7	ACGGGTCGTTGGGATG-1	adlib	ad_libitum_fed	Singlet	neuron	magnaclass2	0	0	1	64	0	0	0	0	0	0	0	0		0	0	1	69	0	0	0	0	0	0	0	yes
adlib_Sample_3893_AT_7	ACGGGTCTCCCTTGTG-1	adlib	ad_libitum_fed	Singlet	neuron	magnaclass2	0	0	0	0	0	0	0	0	0	0	1	0		1	70	0	0	0	0	0	0	0	0	0	no
adlib_Sample_3893_AT_7	ACGGTCGAGTCAGCGA-1	adlib	ad_libitum_fed	Singlet	neuron	corelautus_class	0	0	0	0	0	0	0	0	0	0	0	0		0	0	0	0	0	0	0	0	0	0	0	no
adlib_Sample_3893_AT_7	ACGGTTACAAATAGCA-1	adlib	ad_libitum_fed	Singlet	neuron	Lhx2_class	0	0	0	0	0	0	0	0	0	0	1	0		1	10	0	0	0	0	0	0	0	0	0	no
adlib_Sample_3893_AT_7	ACGGTTAGTCCTCATC-1	adlib	ad_libitum_fed	Singlet	neuron	magnaclass1	0	0	0	0	0	0	0	0	0	0	1	0		1	90	1	0	93	0	0	1	83	0	0	yes
adlib_Sample_3893_AT_7	ACGGTTATCACTTGTT-1	adlib	ad_libitum_fed	Singlet	neuron	Sall3_class	0	0	0	0	0	0	0	0	0	0	1	0		1	40	1	31	39	1	55	0	0	0	0	yes
adlib_Sample_3893_AT_7	ACGGTTATCCCATACC-1	adlib	ad_libitum_fed	Singlet	neuron	Lrmda_class	0	0	0	0	1	56	0	0	0	0	0	0		0	0	1	0	49	1	73	1	39	0	0	yes
adlib_Sample_3893_AT_7	ACGTAACGTGTTGACT-1	adlib	ad_libitum_fed	Singlet	neuron	monoamine_class	0	0	0	0	0	0	0	0	0	0	1	0		1	50	0	0	0	0	0	0	0	0	0	no
adlib_Sample_3893_AT_7	ACGTAACTCACCGCTT-1	adlib	ad_libitum_fed	Singlet	neuron	magnaclass1	0	0	0	0	0	0	0	0	0	0	0	0		0	0	1	0	99	1	54	0	0	1	38	yes
adlib_Sample_3893_AT_7	ACGTACAAGAGGTGCT-1	adlib	ad_libitum_fed	Singlet	neuron	monoamine_class	0	0	0	0	0	0	0	0	0	0	0	0		0	0	0	0	0	0	0	1	76	1	73	yes
adlib_Sample_3893_AT_7	ACGTACACACCCATAA-1	adlib	ad_libitum_fed	Singlet	neuron	magnaclass1	0	0	0	0	0	0	0	0	0	0	0	0		0	0	1	64	0	1	51	0	0	0	0	yes
adlib_Sample_3893_AT_7	ACGTAGTCAGACGGAT-1	adlib	ad_libitum_fed	Singlet	neuron	magnaclass2	0	0	0	0	0	0	0	0	0	0	0	0		0	0	0	0	0	0	0	0	0	0	0	no
adlib_Sample_3893_AT_7	ACGTAGTCAGCCCACA-1	adlib	ad_libitum_fed	Singlet	neuron	magnaclass2	0	0	0	0	0	0	0	0	0	0	1	0		1	6	0	0	0	0	0	1	11	1	98	yes
adlib_Sample_3893_AT_7	ACGTAGTCATGCCGCA-1	adlib	ad_libitum_fed	Singlet	neuron	magnaclass2	0	0	0	0	0	0	0	0	0	0	1	0		1	31	0	0	0	0	0	0	0	0	0	no
adlib_Sample_3893_AT_7	ACGTAGTGTATTCCGA-1	adlib	ad_libitum_fed	Singlet	neuron	magnaclass1	0	0	0	0	0	0	0	0	0	0	0	0		0	0	0	0	0	0	0	0	0	0	0	no
adlib_Sample_3893_AT_7	ACGTAGTGTGGTCCCA-1	adlib	ad_libitum_fed	Singlet	neuron	magnaclass1	0	0	0	0	0	0	0	0	0	0	1	0		1	51	1	0	62	0	0	1	80	0	0	yes
adlib_Sample_3893_AT_7	ACGTAGTTCTCGCTTG-1	adlib	ad_libitum_fed	Singlet	neuron	magnaclass2	0	0	0	0	0	0	0	0	0	0	1	0		1	48	1	0	26	0	0	0	0	0	0	yes
adlib_Sample_3893_AT_7	ACGTCCTAGCCTTTGA-1	adlib	ad_libitum_fed	Singlet	neuron	magnaclass2	0	0	0	0	0	0	0	0	0	0	1	0		1	52	0	0	0	0	0	0	0	0	0	no
adlib_Sample_3893_AT_7	ACGTCCTAGCGTGAGT-1	adlib	ad_libitum_fed	Singlet	neuron	Lrmda_class	0	0	0	0	0	0	0	0	0	0	1	0		1	18	1	0	10	1	34	0	0	0	0	yes
adlib_Sample_3893_AT_7	ACGTCCTGTACTCGCG-1	adlib	ad_libitum_fed	Singlet	neuron	magnaclass1	0	0	0	0	0	0	0	0	0	0	0	0		0	0	1	0	76	0	0	0	0	0	0	no
adlib_Sample_3893_AT_7	ACGTCCTGTACTGGGA-1	adlib	ad_libitum_fed	Singlet	neuron	magnaclass2	0	0	0	0	0	0	0	0	0	0	1	0		1	83	0	0	0	0	0	0	0	0	0	no
adlib_Sample_3893_AT_7	ACGTCCTGTGTCCAAT-1	adlib	ad_libitum_fed	Singlet	neuron	monoamine_class	1	61	1	49	1	78	0	0	0	0	0	0		0	0	0	0	0	0	0	0	0	0	0	no
adlib_Sample_3893_AT_7	ACGTCCTGTTTGTGGT-1	adlib	ad_libitum_fed	Singlet	neuron	Lhx2_class	0	0	0	0	0	0	0	0	0	0	0	0		0	0	0	0	0	0	0	0	0	0	0	no
adlib_Sample_3893_AT_7	ACGTTCCGTGCCCGTA-1	adlib	ad_libitum_fed	Singlet	neuron	magnaclass2	0	0	0	0	0	0	0	0	0	0	0	0		0	0	1	0	56	0	0	0	0	0	0	no
adlib_Sample_3893_AT_7	ACTACGAAGCAGGCTA-1	adlib	ad_libitum_fed	Singlet	neuron	Lrmda_class	0	0	0	0	0	0	0	0	0	0	1	0		1	5	1	1	9	1	70	1	2	0	0	yes
adlib_Sample_3893_AT_7	ACTACGAAGGCGAACT-1	adlib	ad_libitum_fed	Singlet	neuron	monoamine_class	0	0	1	49	0	0	0	0	0	0	0	0		0	0	0	0	0	0	0	0	0	0	0	no
adlib_Sample_3893_AT_7	ACTACGAAGTAGAGTT-1	adlib	ad_libitum_fed	Singlet	neuron	Lrmda_class	0	0	0	0	0	0	0	0	0	0	1	0		1	35	0	0	0	0	0	0	0	0	0	no
adlib_Sample_3893_AT_7	ACTACGACACTCATAG-1	adlib	ad_libitum_fed	Singlet	neuron	monoamine_class	0	0	0	0	0	0	0	0	0	0	0	0		0	0	0	0	0	0	0	0	0	1	25	no
adlib_Sample_3893_AT_7	ACTACGAGTCTCAGGC-1	adlib	ad_libitum_fed	Singlet	neuron	magnaclass1	0	0	0	0	0	0	0	0	0	0	0	0		0	0	1	93	68	0	0	0	0	0	0	no
adlib_Sample_3893_AT_7	ACTACGATCCCTCTTT-1	adlib	ad_libitum_fed	Singlet	neuron	magnaclass2	0	0	0	0	0	0	0	0	0	0	0	0		0	0	0	0	0	0	0	0	0	0	0	no
adlib_Sample_3893_AT_7	ACTACGATCGTGTGGC-1	adlib	ad_libitum_fed	Singlet	neuron	magnaclass1	0	0	0	0	1	79	0	0	0	0	0	0		0	0	1	0	98	1	40	0	0	0	0	yes
adlib_Sample_3893_AT_7	ACTATCTCAACTCATG-1	adlib	ad_libitum_fed	Singlet	neuron	Lrmda_class	0	0	0	0	1	8	0	0	0	0	1	0		1	13	1	25	68	1	27	1	36	0	0	yes
adlib_Sample_3893_AT_7	ACTATCTCAGCAAGAC-1	adlib	ad_libitum_fed	Singlet	neuron	Sall3_class	0	0	0	0	0	0	0	0	0	0	0	0		0	0	1	0	12	0	0	0	0	1	26	yes
adlib_Sample_3893_AT_7	ACTATCTCATGTGCTA-1	adlib	ad_libitum_fed	Singlet	neuron	Lhx2_class	0	0	0	0	0	0	0	0	0	0	1	0		1	49	0	0	0	0	0	0	0	0	0	no
adlib_Sample_3893_AT_7	ACTATCTTCAGCAGAG-1	adlib	ad_libitum_fed	Singlet	neuron	magnaclass1	0	0	0	0	0	0	0	0	0	0	0	0		0	0	1	78	64	1	67	0	0	0	0	yes
adlib_Sample_3893_AT_7	ACTATGGCAGGTAGTG-1	adlib	ad_libitum_fed	Singlet	neuron	Lhx2_class	0	0	0	0	0	0	0	0	0	0	1	0		1	43	0	0	0	0	0	0	0	0	0	no
adlib_Sample_3893_AT_7	ACTATGGTCTCATTAC-1	adlib	ad_libitum_fed	Singlet	neuron	magnaclass1	0	0	0	0	0	0	0	0	0	0	0	0		0	0	1	87	0	0	0	0	0	0	0	no
adlib_Sample_3893_AT_7	ACTATTCCAAAGGCAC-1	adlib	ad_libitum_fed	Singlet	neuron	magnaclass2	0	0	0	0	0	0	0	0	0	0	0	0		0	0	0	0	0	0	0	0	0	0	0	no
adlib_Sample_3893_AT_7	ACTATTCCAGAACTAA-1	adlib	ad_libitum_fed	Singlet	neuron	magnaclass2	0	0	0	0	0	0	0	0	0	0	1	0		1	30	0	0	0	0	0	0	0	0	0	no
adlib_Sample_3893_AT_7	ACTATTCGTAGGGTAC-1	adlib	ad_libitum_fed	Singlet	neuron	magnaclass1	0	0	0	0	0	0	0	0	0	0	1	0		1	83	1	94	0	1	59	0	0	0	0	yes
adlib_Sample_3893_AT_7	ACTATTCTCGCTAAAC-1	adlib	ad_libitum_fed	Singlet	neuron	magnaclass1	0	0	0	0	0	0	0	0	0	0	0	0		0	0	1	78	0	1	86	0	0	0	0	yes
adlib_Sample_3893_AT_7	ACTCCCAAGCAGTCTT-1	adlib	ad_libitum_fed	Singlet	neuron	magnaclass2	0	0	0	0	0	0	0	0	0	0	0	0		0	0	0	0	0	0	0	0	0	0	0	no
adlib_Sample_3893_AT_7	ACTCCCAAGCATGCAG-1	adlib	ad_libitum_fed	Singlet	neuron	magnaclass1	0	0	0	0	0	0	0	0	0	0	0	0		0	0	1	0	86	1	21	1	43	0	0	yes
adlib_Sample_3893_AT_7	ACTCCCAAGTGGTTGG-1	adlib	ad_libitum_fed	Singlet	neuron	magnaclass1	0	0	0	0	0	0	0	0	0	0	0	0		0	0	1	37	59	1	63	1	49	0	0	yes
adlib_Sample_3893_AT_7	ACTCCCACAACAAAGT-1	adlib	ad_libitum_fed	Singlet	neuron	magnaclass2	0	0	0	0	0	0	0	0	0	0	1	0		1	57	0	0	0	0	0	0	0	1	21	yes
adlib_Sample_3893_AT_7	ACTCCCACAGGACTAG-1	adlib	ad_libitum_fed	Singlet	neuron	magnaclass2	0	0	0	0	0	0	0	0	0	0	1	0		1	28	0	0	0	0	0	0	0	0	0	no
adlib_Sample_3893_AT_7	ACTCCCATCGCTAAAC-1	adlib	ad_libitum_fed	Singlet	neuron	monoamine_class	0	0	1	43	0	0	0	0	0	0	0	0		0	0	0	0	0	0	0	0	0	1	52	yes
adlib_Sample_3893_AT_7	ACTCCCATCTTACCGC-1	adlib	ad_libitum_fed	Singlet	neuron	magnaclass1	0	0	0	0	0	0	0	0	0	0	0	0		0	0	1	0	99	0	0	0	0	0	0	no
adlib_Sample_3893_AT_7	ACTCTCGCAAGGACAC-1	adlib	ad_libitum_fed	Singlet	neuron	magnaclass1	0	0	0	0	0	0	0	0	0	0	0	0		0	0	0	0	0	0	0	0	0	0	0	no
adlib_Sample_3893_AT_7	ACTCTCGCACGTCGTG-1	adlib	ad_libitum_fed	Singlet	neuron	Lrmda_class	0	0	0	0	0	0	0	0	0	0	0	0		0	0	0	0	0	1	96	0	0	0	0	no
adlib_Sample_3893_AT_7	ACTCTCGCACTACCGG-1	adlib	ad_libitum_fed	Singlet	neuron	Sall3_class	0	0	0	0	0	0	0	0	0	0	1	0		1	96	0	0	0	1	45	1	96	0	0	yes
adlib_Sample_3893_AT_7	ACTCTCGTCATCTGTT-1	adlib	ad_libitum_fed	Singlet	neuron	magnaclass2	0	0	0	0	0	0	0	0	0	0	1	0		1	65	0	0	0	0	0	1	86	0	0	yes
adlib_Sample_3893_AT_7	ACTGATGAGGTCACTT-1	adlib	ad_libitum_fed	Singlet	neuron	magnaclass1	0	0	0	0	0	0	0	0	0	0	0	0		0	0	1	97	82	1	85	0	0	0	0	yes
adlib_Sample_3893_AT_7	ACTGATGTCGCATTAG-1	adlib	ad_libitum_fed	Singlet	neuron	magnaclass1	0	0	0	0	0	0	0	0	0	0	1	0		1	95	1	59	79	1	82	0	0	0	0	yes
adlib_Sample_3893_AT_7	ACTGATGTCGCCGATG-1	adlib	ad_libitum_fed	Singlet	neuron	magnaclass2	0	0	0	0	0	0	0	0	0	0	0	0		0	0	0	0	0	0	0	0	0	0	0	no
adlib_Sample_3893_AT_7	ACTGCAAAGAGCAGCT-1	adlib	ad_libitum_fed	Singlet	neuron	magnaclass2	0	0	0	0	0	0	0	0	0	0	1	0		1	99	0	0	0	0	0	0	0	0	0	no
adlib_Sample_3893_AT_7	ACTGCAAAGTAGCAAT-1	adlib	ad_libitum_fed	Singlet	neuron	magnaclass1	0	0	0	0	0	0	0	0	0	0	0	0		0	0	1	0	79	0	0	0	0	0	0	no
adlib_Sample_3893_AT_7	ACTGTCCGTTATGTCG-1	adlib	ad_libitum_fed	Singlet	neuron	Sall3_class	0	0	0	0	0	0	0	0	0	0	1	0		1	27	0	0	0	1	66	0	0	1	29	yes
adlib_Sample_3893_AT_7	ACTGTGAAGACAGCTG-1	adlib	ad_libitum_fed	Singlet	neuron	monoamine_class	0	0	1	89	0	0	1	91	0	0	0	0		0	0	1	59	78	0	0	0	0	0	0	yes
adlib_Sample_3893_AT_7	ACTGTGACAACCGGAA-1	adlib	ad_libitum_fed	Singlet	neuron	Lhx2_class	0	0	0	0	0	0	0	0	0	0	1	0		1	34	0	0	0	0	0	0	0	1	10	yes
adlib_Sample_3893_AT_7	ACTGTGAGTAGCGCCT-1	adlib	ad_libitum_fed	Singlet	neuron	monoamine_class	0	0	0	0	1	72	0	0	0	0	0	0		0	0	0	0	0	0	0	0	0	1	52	yes
adlib_Sample_3893_AT_7	ACTGTGAGTCTCACAA-1	adlib	ad_libitum_fed	Singlet	neuron	magnaclass2	0	0	0	0	0	0	0	0	0	0	1	0		1	57	0	0	0	0	0	0	0	1	52	yes
adlib_Sample_3893_AT_7	ACTGTGAGTGGAAATT-1	adlib	ad_libitum_fed	Singlet	neuron	magnaclass2	0	0	0	0	0	0	0	0	0	0	1	0		1	63	0	0	0	0	0	0	0	0	0	no
adlib_Sample_3893_AT_7	ACTGTGAGTTGAGAGC-1	adlib	ad_libitum_fed	Singlet	neuron	magnaclass2	0	0	0	0	0	0	0	0	0	0	0	0		0	0	0	0	0	0	0	0	0	0	0	no
adlib_Sample_3893_AT_7	ACTTAGGGTCATCACA-1	adlib	ad_libitum_fed	Singlet	neuron	magnaclass2	0	0	0	0	0	0	0	0	1	58	1	0		1	90	0	0	0	0	0	0	0	0	0	yes
adlib_Sample_3893_AT_7	ACTTAGGTCATACAGC-1	adlib	ad_libitum_fed	Singlet	neuron	Sall3_class	0	0	0	0	0	0	0	0	0	0	0	0		0	0	0	0	0	0	0	0	0	0	0	no
adlib_Sample_3893_AT_7	ACTTATCAGCTAGTTC-1	adlib	ad_libitum_fed	Singlet	neuron	corelautus_class	0	0	0	0	0	0	0	0	0	0	0	0		0	0	0	0	0	1	99	0	0	0	0	no
adlib_Sample_3893_AT_7	ACTTATCCACGCTGTG-1	adlib	ad_libitum_fed	Singlet	neuron	magnaclass1	0	0	0	0	0	0	0	0	0	0	1	0		1	53	1	91	29	0	0	0	0	0	0	yes
adlib_Sample_3893_AT_7	ACTTATCTCGTGGCGT-1	adlib	ad_libitum_fed	Singlet	neuron	Sall3_class	0	0	0	0	0	0	0	0	0	0	1	0		1	63	1	50	0	1	3	0	0	0	0	yes
adlib_Sample_3893_AT_7	ACTTCCGAGCGGCTCT-1	adlib	ad_libitum_fed	Singlet	neuron	Lrmda_class	0	0	0	0	0	0	0	0	0	0	0	0		0	0	0	0	0	0	0	0	0	1	30	no
adlib_Sample_3893_AT_7	ACTTCCGGTGGGTATG-1	adlib	ad_libitum_fed	Singlet	neuron	Lhx2_class	0	0	0	0	0	0	0	0	0	0	0	0		0	0	0	0	0	0	0	0	0	1	67	no
adlib_Sample_3893_AT_7	ACTTCCGTCATCACTT-1	adlib	ad_libitum_fed	Singlet	neuron	corelautus_class	0	0	0	0	0	0	0	0	0	0	0	0		0	0	0	0	0	0	0	0	0	0	0	no
adlib_Sample_3893_AT_7	ACTTCCGTCCTCTAGC-1	adlib	ad_libitum_fed	Singlet	neuron	magnaclass2	1	61	0	0	0	0	0	0	0	0	1	0		1	64	0	0	0	0	0	0	0	0	0	yes
adlib_Sample_3893_AT_7	ACTTCGCCAATGTCTG-1	adlib	ad_libitum_fed	Singlet	neuron	magnaclass2	0	0	0	0	0	0	0	0	0	0	0	0		0	0	0	0	0	0	0	0	0	0	0	no
adlib_Sample_3893_AT_7	ACTTCGCCAGACGGAT-1	adlib	ad_libitum_fed	Singlet	neuron	magnaclass1	0	0	0	0	0	0	0	0	0	0	1	0		1	98	1	0	99	1	92	0	0	0	0	yes
adlib_Sample_3893_AT_7	ACTTCGCTCCATTTCA-1	adlib	ad_libitum_fed	Singlet	neuron	magnaclass2	0	0	0	0	0	0	0	0	0	0	0	0		0	0	0	0	0	0	0	0	0	0	0	no
adlib_Sample_3893_AT_7	ACTTTCACATCATGAC-1	adlib	ad_libitum_fed	Singlet	neuron	Lhx2_class	0	0	0	0	0	0	0	0	0	0	1	0		1	76	0	0	0	0	0	0	0	1	43	yes
adlib_Sample_3893_AT_7	ACTTTCAGTTTGAAAG-1	adlib	ad_libitum_fed	Singlet	neuron	magnaclass2	0	0	0	0	0	0	0	0	0	0	0	0		0	0	0	0	0	0	0	0	0	0	0	no
adlib_Sample_3893_AT_7	ACTTTGTAGACGATAT-1	adlib	ad_libitum_fed	Singlet	neuron	corelautus_class	0	0	0	0	1	74	0	0	0	0	0	0		0	0	0	0	0	1	71	0	0	0	0	yes
adlib_Sample_3893_AT_7	ACTTTGTAGTGACCTT-1	adlib	ad_libitum_fed	Singlet	neuron	magnaclass1	0	0	0	0	1	84	0	0	0	0	1	0		1	50	1	38	61	1	6	0	0	0	0	yes
adlib_Sample_3893_AT_7	ACTTTGTCAGGCATTT-1	adlib	ad_libitum_fed	Singlet	neuron	magnaclass1	0	0	0	0	1	89	0	0	0	0	0	0		0	0	1	34	56	0	0	0	0	0	0	yes
adlib_Sample_3893_AT_7	ACTTTGTCATGGTGGA-1	adlib	ad_libitum_fed	Singlet	neuron	magnaclass1	0	0	0	0	0	0	0	0	0	0	0	0		0	0	0	0	0	0	0	0	0	0	0	no
adlib_Sample_3893_AT_7	ACTTTGTGTGAGTGAC-1	adlib	ad_libitum_fed	Singlet	neuron	Lrmda_class	0	0	0	0	0	0	0	0	0	0	0	0		0	0	1	0	21	0	0	0	0	0	0	no
adlib_Sample_3893_AT_7	AGAAATGAGGACAAGA-1	adlib	ad_libitum_fed	Singlet	neuron	magnaclass2	0	0	0	0	0	0	0	0	0	0	0	0		0	0	0	0	0	0	0	0	0	0	0	no
adlib_Sample_3893_AT_7	AGAAATGAGTATGTAG-1	adlib	ad_libitum_fed	Singlet	neuron	Lhx2_class	0	0	0	0	0	0	0	0	0	0	0	0		0	0	0	0	0	0	0	0	0	1	41	no
adlib_Sample_3893_AT_7	AGAAATGAGTCACGAG-1	adlib	ad_libitum_fed	Singlet	neuron	magnaclass2	0	0	0	0	0	0	0	0	0	0	1	0		1	52	0	0	0	0	0	1	52	1	49	yes
adlib_Sample_3893_AT_7	AGAAATGCAATTGAGA-1	adlib	ad_libitum_fed	Singlet	neuron	Sall3_class	0	0	0	0	0	0	0	0	0	0	0	0		0	0	1	88	78	1	24	0	0	0	0	yes
adlib_Sample_3893_AT_7	AGAAATGGTTGACTGT-1	adlib	ad_libitum_fed	Singlet	neuron	monoamine_class	0	0	0	0	1	77	0	0	0	0	0	0		0	0	0	0	0	0	0	0	0	0	0	no
adlib_Sample_3893_AT_7	AGAAATGGTTTCGACA-1	adlib	ad_libitum_fed	Singlet	neuron	Lrmda_class	0	0	0	0	0	0	0	0	0	0	1	0		1	77	1	0	35	1	95	0	0	1	11	yes
adlib_Sample_3893_AT_7	AGAAATGTCCATACTT-1	adlib	ad_libitum_fed	Singlet	neuron	Sall3_class	0	0	0	0	0	0	0	0	0	0	1	0		1	44	0	0	0	0	0	0	0	1	74	yes
adlib_Sample_3893_AT_7	AGAACAAAGCAGAAAG-1	adlib	ad_libitum_fed	Singlet	neuron	Lhx2_class	0	0	0	0	0	0	0	0	0	0	0	0		0	0	0	0	0	0	0	0	0	0	0	no
adlib_Sample_3893_AT_7	AGAACAAAGGTCGTGA-1	adlib	ad_libitum_fed	Singlet	neuron	Sall3_class	0	0	0	0	0	0	0	0	0	0	1	0		1	78	1	0	83	1	86	0	0	0	0	yes
adlib_Sample_3893_AT_7	AGAACAACAACTCGTA-1	adlib	ad_libitum_fed	Singlet	neuron	Sall3_class	0	0	0	0	1	92	0	0	0	0	0	0		0	0	1	91	99	0	0	0	0	0	0	yes
adlib_Sample_3893_AT_7	AGAACAACAAGCTACT-1	adlib	ad_libitum_fed	Singlet	neuron	magnaclass2	0	0	0	0	0	0	0	0	0	0	0	0		0	0	0	0	0	0	0	0	0	0	0	no
adlib_Sample_3893_AT_7	AGAACAATCCAGCCTT-1	adlib	ad_libitum_fed	Singlet	neuron	magnaclass2	0	0	0	0	0	0	0	0	0	0	1	0		1	3	0	0	0	0	0	0	0	0	0	no
adlib_Sample_3893_AT_7	AGAACCTCAGTCGCAC-1	adlib	ad_libitum_fed	Singlet	neuron	Sall3_class	0	0	0	0	0	0	0	0	0	0	0	0		0	0	1	0	79	0	0	0	0	0	0	no
adlib_Sample_3893_AT_7	AGAACCTCAGTCTCTC-1	adlib	ad_libitum_fed	Singlet	neuron	magnaclass1	0	0	0	0	0	0	0	0	0	0	1	0		1	45	1	34	57	1	23	0	0	0	0	yes
adlib_Sample_3893_AT_7	AGAAGCGCAGGGAATC-1	adlib	ad_libitum_fed	Singlet	neuron	magnaclass2	0	0	0	0	0	0	0	0	0	0	1	0		1	93	0	0	0	0	0	0	0	0	0	no
adlib_Sample_3893_AT_7	AGAAGCGGTCCAGTTA-1	adlib	ad_libitum_fed	Singlet	neuron	Lrmda_class	0	0	0	0	0	0	0	0	0	0	1	0		1	62	0	0	0	1	74	1	26	1	24	yes
adlib_Sample_3893_AT_7	AGAAGTACAAGGGCAT-1	adlib	ad_libitum_fed	Singlet	neuron	magnaclass1	0	0	0	0	0	0	0	0	0	0	0	0		0	0	1	56	76	1	79	0	0	1	86	yes
adlib_Sample_3893_AT_7	AGAAGTATCGGATACT-1	adlib	ad_libitum_fed	Singlet	neuron	magnaclass2	0	0	0	0	1	55	0	0	0	0	1	0		1	33	0	0	0	0	0	0	0	0	0	yes
adlib_Sample_3893_AT_7	AGAAGTATCTAAGCCA-1	adlib	ad_libitum_fed	Singlet	neuron	magnaclass2	0	0	0	0	0	0	0	0	0	0	0	0		0	0	0	0	0	0	0	0	0	0	0	no
adlib_Sample_3893_AT_7	AGACAAACAGCAGACA-1	adlib	ad_libitum_fed	Singlet	neuron	magnaclass2	0	0	0	0	0	0	0	0	0	0	0	0		0	0	0	0	0	0	0	0	0	1	7	no
adlib_Sample_3893_AT_7	AGACAAACATCTATCT-1	adlib	ad_libitum_fed	Singlet	neuron	magnaclass1	0	0	0	0	1	70	0	0	0	0	1	0		1	52	1	40	91	1	85	0	0	0	0	yes
adlib_Sample_3893_AT_7	AGACAAATCTCTGGTC-1	adlib	ad_libitum_fed	Singlet	neuron	monoamine_class	0	0	0	0	0	0	0	0	0	0	1	0		1	83	0	0	0	0	0	0	0	0	0	no
adlib_Sample_3893_AT_7	AGACACTAGGTTCATC-1	adlib	ad_libitum_fed	Singlet	neuron	Lrmda_class	0	0	0	0	0	0	0	0	0	0	0	0		0	0	1	0	65	1	68	0	0	0	0	yes
adlib_Sample_3893_AT_7	AGACACTGTAGGCTCC-1	adlib	ad_libitum_fed	Singlet	neuron	magnaclass1	0	0	0	0	0	0	0	0	0	0	0	0		0	0	1	0	52	0	0	0	0	0	0	no
adlib_Sample_3893_AT_7	AGACACTGTCGAACAG-1	adlib	ad_libitum_fed	Singlet	neuron	magnaclass1	0	0	0	0	0	0	0	0	0	0	1	0		1	28	1	21	78	1	43	0	0	0	0	yes
adlib_Sample_3893_AT_7	AGACAGGAGAGGGCGA-1	adlib	ad_libitum_fed	Singlet	neuron	magnaclass2	0	0	0	0	0	0	0	0	0	0	0	0		0	0	0	0	0	0	0	0	0	1	44	no
adlib_Sample_3893_AT_7	AGACAGGGTAGGTCAG-1	adlib	ad_libitum_fed	Singlet	neuron	Lrmda_class	0	0	0	0	1	47	0	0	0	0	0	0		0	0	0	0	0	1	12	0	0	0	0	yes
adlib_Sample_3893_AT_7	AGACAGGGTGTCCCTT-1	adlib	ad_libitum_fed	Singlet	neuron	magnaclass1	0	0	0	0	0	0	0	0	1	74	0	0		0	0	1	71	88	0	0	0	0	0	0	yes
adlib_Sample_3893_AT_7	AGACCATAGGCATTTC-1	adlib	ad_libitum_fed	Singlet	neuron	magnaclass1	0	0	0	0	1	59	0	0	0	0	1	0		1	38	1	0	85	1	76	0	0	0	0	yes
adlib_Sample_3893_AT_7	AGACCATGTCATCGGC-1	adlib	ad_libitum_fed	Singlet	neuron	magnaclass2	0	0	0	0	0	0	0	0	0	0	1	0		1	54	0	0	0	0	0	0	0	0	0	no
adlib_Sample_3893_AT_7	AGACCATGTCCTACGG-1	adlib	ad_libitum_fed	Singlet	neuron	monoamine_class	0	0	0	0	0	0	0	0	0	0	1	0		1	49	0	0	0	0	0	0	0	1	46	yes
adlib_Sample_3893_AT_7	AGACCATGTTGTTGTG-1	adlib	ad_libitum_fed	Singlet	neuron	magnaclass2	0	0	0	0	0	0	0	0	0	0	0	0		0	0	0	0	0	0	0	0	0	0	0	no
adlib_Sample_3893_AT_7	AGACCATTCACATTGG-1	adlib	ad_libitum_fed	Singlet	neuron	magnaclass2	0	0	0	0	0	0	0	0	0	0	1	0		1	68	0	0	0	0	0	0	0	0	0	no
adlib_Sample_3893_AT_7	AGACCATTCACCGGTG-1	adlib	ad_libitum_fed	Singlet	neuron	magnaclass2	0	0	0	0	1	44	0	0	0	0	1	0		1	65	0	0	0	0	0	0	0	0	0	yes
adlib_Sample_3893_AT_7	AGACCATTCCACACAA-1	adlib	ad_libitum_fed	Singlet	neuron	magnaclass1	0	0	0	0	0	0	0	0	0	0	0	0		0	0	0	0	0	0	0	0	0	0	0	no
adlib_Sample_3893_AT_7	AGACCCGCAGAGTTGG-1	adlib	ad_libitum_fed	Singlet	neuron	magnaclass1	0	0	0	0	0	0	0	0	0	0	0	0		0	0	1	33	76	1	22	0	0	0	0	yes
adlib_Sample_3893_AT_7	AGACCCGCAGCCTACG-1	adlib	ad_libitum_fed	Singlet	neuron	magnaclass2	0	0	0	0	0	0	0	0	0	0	1	0		1	91	0	0	0	0	0	0	0	0	0	no
adlib_Sample_3893_AT_7	AGACCCGGTCTGGTTA-1	adlib	ad_libitum_fed	Singlet	neuron	magnaclass1	0	0	0	0	0	0	0	0	0	0	1	0		1	42	1	80	75	1	4	0	0	0	0	yes
adlib_Sample_3893_AT_7	AGACTCAAGCATGCAG-1	adlib	ad_libitum_fed	Singlet	neuron	magnaclass1	0	0	0	0	0	0	0	0	0	0	0	0		0	0	1	48	35	0	0	0	0	0	0	no
adlib_Sample_3893_AT_7	AGACTCAAGCTAATGA-1	adlib	ad_libitum_fed	Singlet	neuron	magnaclass1	0	0	0	0	0	0	0	0	0	0	0	0		0	0	0	0	0	0	0	0	0	0	0	no
adlib_Sample_3893_AT_7	AGACTCAAGTACCATC-1	adlib	ad_libitum_fed	Singlet	neuron	Lhx2_class	0	0	0	0	0	0	0	0	0	0	1	0		1	21	0	0	0	0	0	0	0	1	24	yes
adlib_Sample_3893_AT_7	AGACTCACACACGTGC-1	adlib	ad_libitum_fed	Singlet	neuron	Sall3_class	0	0	0	0	0	0	0	0	0	0	1	0		1	72	1	59	15	1	14	0	0	0	0	yes
adlib_Sample_3893_AT_7	AGACTCATCCGACAGC-1	adlib	ad_libitum_fed	Singlet	neuron	magnaclass1	0	0	0	0	0	0	0	0	0	0	0	0		0	0	1	0	81	0	0	0	0	0	0	no
adlib_Sample_3893_AT_7	AGAGAATAGGATATAC-1	adlib	ad_libitum_fed	Singlet	neuron	monoamine_class	0	0	0	0	0	0	0	0	0	0	0	0		0	0	0	0	0	0	0	0	0	0	0	no
adlib_Sample_3893_AT_7	AGAGAATCACATAGCT-1	adlib	ad_libitum_fed	Singlet	neuron	magnaclass2	1	19	0	0	0	0	0	0	0	0	1	0		1	18	0	0	0	0	0	0	0	0	0	yes
adlib_Sample_3893_AT_7	AGAGAATCAGCTACTA-1	adlib	ad_libitum_fed	Singlet	neuron	magnaclass1	0	0	0	0	0	0	0	0	0	0	1	0		1	31	1	0	67	1	15	0	0	0	0	yes
adlib_Sample_3893_AT_7	AGAGAATGTAGTTAGA-1	adlib	ad_libitum_fed	Singlet	neuron	magnaclass1	0	0	0	0	0	0	0	0	0	0	1	0		1	24	1	19	60	0	0	1	87	0	0	yes
adlib_Sample_3893_AT_7	AGAGAATGTGCTCTCT-1	adlib	ad_libitum_fed	Singlet	neuron	magnaclass1	0	0	0	0	0	0	0	0	0	0	1	0		1	90	1	80	66	0	0	0	0	0	0	yes
adlib_Sample_3893_AT_7	AGAGAGCAGCCTCTTC-1	adlib	ad_libitum_fed	Singlet	neuron	monoamine_class	0	0	0	0	0	0	0	0	0	0	1	1		0	0	0	0	0	0	0	0	0	1	46	yes
adlib_Sample_3893_AT_7	AGAGAGCAGCGCACAA-1	adlib	ad_libitum_fed	Singlet	neuron	monoamine_class	0	0	1	52	0	0	0	0	0	0	0	0		0	0	0	0	0	0	0	0	0	0	0	no
adlib_Sample_3893_AT_7	AGAGAGCAGTTCATGC-1	adlib	ad_libitum_fed	Singlet	neuron	magnaclass2	0	0	0	0	0	0	0	0	0	0	0	0		0	0	0	0	0	0	0	0	0	1	88	no
adlib_Sample_3893_AT_7	AGAGAGCCATGACAAA-1	adlib	ad_libitum_fed	Singlet	neuron	magnaclass1	0	0	0	0	0	0	0	0	0	0	1	0		1	60	1	47	34	0	0	0	0	0	0	yes
adlib_Sample_3893_AT_7	AGAGCAGAGTGAGCCA-1	adlib	ad_libitum_fed	Singlet	neuron	magnaclass1	0	0	0	0	0	0	0	0	0	0	1	0		1	26	0	0	0	1	41	0	0	0	0	yes
adlib_Sample_3893_AT_7	AGAGCAGCAGCAGTAG-1	adlib	ad_libitum_fed	Singlet	neuron	magnaclass1	0	0	0	0	0	0	0	0	0	0	1	0		1	93	0	0	0	0	0	0	0	0	0	no
adlib_Sample_3893_AT_7	AGAGCAGGTCAACCTA-1	adlib	ad_libitum_fed	Singlet	neuron	magnaclass2	0	0	0	0	0	0	0	0	0	0	1	0		1	31	0	0	0	0	0	0	0	1	33	yes
adlib_Sample_3893_AT_7	AGAGCAGGTCTTTATC-1	adlib	ad_libitum_fed	Singlet	neuron	magnaclass1	0	0	0	0	0	0	0	0	0	0	0	0		0	0	1	0	84	0	0	0	0	0	0	no
adlib_Sample_3893_AT_7	AGAGCAGGTGACACAG-1	adlib	ad_libitum_fed	Singlet	neuron	Lrmda_class	0	0	0	0	0	0	0	0	0	0	1	0		1	32	1	0	89	1	15	0	0	0	0	yes
adlib_Sample_3893_AT_7	AGAGCAGTCCGCAACG-1	adlib	ad_libitum_fed	Singlet	neuron	monoamine_class	0	0	0	0	0	0	0	0	0	0	1	0		1	83	0	0	0	0	0	0	0	1	42	yes
adlib_Sample_3893_AT_7	AGAGCAGTCGACGCGT-1	adlib	ad_libitum_fed	Singlet	neuron	magnaclass2	0	0	1	75	0	0	0	0	0	0	0	0		0	0	0	0	0	0	0	0	0	0	0	no
adlib_Sample_3893_AT_7	AGAGCCCAGATTGCGG-1	adlib	ad_libitum_fed	Singlet	neuron	magnaclass1	0	0	0	0	0	0	0	0	0	0	0	0		0	0	0	0	0	1	37	0	0	0	0	no
adlib_Sample_3893_AT_7	AGAGCCCGTAGAGACC-1	adlib	ad_libitum_fed	Singlet	neuron	magnaclass2	0	0	0	0	0	0	0	0	0	0	1	0		1	72	0	0	0	0	0	0	0	0	0	no
adlib_Sample_3893_AT_7	AGAGCCCGTCTTGAGT-1	adlib	ad_libitum_fed	Singlet	neuron	Lrmda_class	0	0	0	0	0	0	0	0	0	0	1	0		1	50	1	0	90	0	0	0	0	0	0	yes
adlib_Sample_3893_AT_7	AGAGCCCGTTAAGGAT-1	adlib	ad_libitum_fed	Singlet	neuron	Lrmda_class	0	0	0	0	0	0	0	0	0	0	0	0		0	0	0	0	0	1	21	0	0	0	0	no
adlib_Sample_3893_AT_7	AGAGCCCTCAGACCGC-1	adlib	ad_libitum_fed	Singlet	neuron	magnaclass1	0	0	0	0	0	0	0	0	0	0	0	0		0	0	1	0	51	0	0	0	0	0	0	no
adlib_Sample_3893_AT_7	AGAGCCCTCCGTAATG-1	adlib	ad_libitum_fed	Singlet	neuron	magnaclass2	0	0	0	0	0	0	0	0	0	0	0	0		0	0	0	0	0	0	0	0	0	1	48	no
adlib_Sample_3893_AT_7	AGATAGAAGAGAGGGC-1	adlib	ad_libitum_fed	Singlet	neuron	monoamine_class	0	0	0	0	0	0	0	0	0	0	1	0		1	31	0	0	0	0	0	0	0	0	0	no
adlib_Sample_3893_AT_7	AGATAGAAGAGTTCGG-1	adlib	ad_libitum_fed	Singlet	neuron	magnaclass1	0	0	0	0	1	94	0	0	0	0	0	0		0	0	1	0	75	0	0	1	64	0	0	yes
adlib_Sample_3893_AT_7	AGATAGAAGCGGTATG-1	adlib	ad_libitum_fed	Singlet	neuron	magnaclass1	0	0	0	0	0	0	0	0	0	0	1	0		1	74	1	38	0	1	47	0	0	0	0	yes
adlib_Sample_3893_AT_7	AGATAGACACGTTGGC-1	adlib	ad_libitum_fed	Singlet	neuron	monoamine_class	0	0	0	0	0	0	0	0	0	0	1	0		1	23	1	0	12	0	0	0	0	0	0	yes
adlib_Sample_3893_AT_7	AGATAGACAGAGGTAC-1	adlib	ad_libitum_fed	Singlet	neuron	Lrmda_class	0	0	0	0	0	0	0	0	0	0	1	0		1	15	0	0	0	0	0	0	0	0	0	no
adlib_Sample_3893_AT_7	AGATAGACAGCGAACA-1	adlib	ad_libitum_fed	Singlet	neuron	magnaclass1	0	0	0	0	0	0	0	0	0	0	0	0		0	0	1	67	0	0	0	0	0	0	0	no
adlib_Sample_3893_AT_7	AGATAGAGTCAAGTTC-1	adlib	ad_libitum_fed	Singlet	neuron	magnaclass1	0	0	0	0	0	0	0	0	0	0	1	0		1	76	0	0	0	0	0	1	70	0	0	yes
adlib_Sample_3893_AT_7	AGATAGATCCAACCGG-1	adlib	ad_libitum_fed	Singlet	neuron	magnaclass2	0	0	0	0	0	0	0	0	0	0	1	0		1	44	1	34	24	1	80	0	0	1	43	yes
adlib_Sample_3893_AT_7	AGATAGATCGGTCTAA-1	adlib	ad_libitum_fed	Singlet	neuron	Sall3_class	0	0	0	0	0	0	0	0	0	0	0	0		0	0	0	0	0	1	24	0	0	1	44	yes
adlib_Sample_3893_AT_7	AGATAGATCTACGCGG-1	adlib	ad_libitum_fed	Singlet	neuron	magnaclass2	0	0	0	0	0	0	0	0	0	0	0	0		0	0	0	0	0	0	0	0	0	0	0	no
adlib_Sample_3893_AT_7	AGATCCAAGTCATCCA-1	adlib	ad_libitum_fed	Singlet	neuron	magnaclass2	0	0	0	0	0	0	0	0	0	0	1	0		1	75	0	0	0	0	0	0	0	0	0	no
adlib_Sample_3893_AT_7	AGATCCATCCGCATAA-1	adlib	ad_libitum_fed	Singlet	neuron	magnaclass2	0	0	0	0	0	0	0	0	0	0	1	0		1	72	0	0	0	0	0	0	0	0	0	no
adlib_Sample_3893_AT_7	AGATCGTAGCAGGTCA-1	adlib	ad_libitum_fed	Singlet	neuron	Sall3_class	0	0	0	0	0	0	0	0	0	0	0	0		0	0	0	0	0	0	0	0	0	0	0	no
adlib_Sample_3893_AT_7	AGATCGTCAATCTGCA-1	adlib	ad_libitum_fed	Singlet	neuron	Lhx2_class	0	0	0	0	0	0	0	0	0	0	0	0		0	0	0	0	0	0	0	0	0	0	0	no
adlib_Sample_3893_AT_7	AGATCGTTCGGTTGTA-1	adlib	ad_libitum_fed	Singlet	neuron	magnaclass1	0	0	0	0	0	0	0	0	0	0	0	0		0	0	1	92	94	1	96	0	0	0	0	yes
adlib_Sample_3893_AT_7	AGATCGTTCTGGAGAG-1	adlib	ad_libitum_fed	Singlet	neuron	Lrmda_class	0	0	0	0	0	0	0	0	0	0	0	0		0	0	1	0	26	1	62	0	0	0	0	yes
adlib_Sample_3893_AT_7	AGATGAACAAGAATAC-1	adlib	ad_libitum_fed	Singlet	neuron	magnaclass1	0	0	0	0	0	0	0	0	0	0	0	0		0	0	0	0	0	0	0	0	0	0	0	no
adlib_Sample_3893_AT_7	AGATGAACACCAGTAT-1	adlib	ad_libitum_fed	Singlet	neuron	magnaclass1	0	0	0	0	0	0	0	0	0	0	1	0		1	99	0	0	0	0	0	0	0	1	62	yes
adlib_Sample_3893_AT_7	AGATGAATCGCCTTGT-1	adlib	ad_libitum_fed	Singlet	neuron	Lrmda_class	0	0	0	0	0	0	0	0	0	0	1	0		1	4	0	0	0	1	2	0	0	0	0	yes
adlib_Sample_3893_AT_7	AGATGCTAGGAACGAA-1	adlib	ad_libitum_fed	Singlet	neuron	monoamine_class	0	0	0	0	0	0	0	0	0	0	1	0		1	39	0	0	0	0	0	0	0	0	0	no
adlib_Sample_3893_AT_7	AGATGCTCAATTGTGC-1	adlib	ad_libitum_fed	Singlet	neuron	magnaclass2	0	0	0	0	0	0	0	0	0	0	0	0		0	0	0	0	0	0	0	0	0	0	0	no
adlib_Sample_3893_AT_7	AGATGCTGTCTTAGTG-1	adlib	ad_libitum_fed	Singlet	neuron	magnaclass2	0	0	0	0	0	0	0	0	0	0	1	0		1	65	0	0	0	0	0	0	0	0	0	no
adlib_Sample_3893_AT_7	AGATGCTTCATCCCGT-1	adlib	ad_libitum_fed	Singlet	neuron	corelautus_class	0	0	0	0	0	0	0	0	0	0	0	0		0	0	0	0	0	0	0	0	0	0	0	no
adlib_Sample_3893_AT_7	AGCATCAAGCCGGATA-1	adlib	ad_libitum_fed	Singlet	neuron	magnaclass2	0	0	0	0	0	0	0	0	0	0	0	0		0	0	0	0	0	0	0	0	0	0	0	no
adlib_Sample_3893_AT_7	AGCATCAAGGAAGAAC-1	adlib	ad_libitum_fed	Singlet	neuron	magnaclass2	0	0	0	0	0	0	0	0	0	0	1	0		1	86	0	0	0	0	0	0	0	0	0	no
adlib_Sample_3893_AT_7	AGCATCAAGTCTAGCT-1	adlib	ad_libitum_fed	Singlet	neuron	magnaclass1	0	0	0	0	0	0	0	0	0	0	1	0		1	51	1	4	0	1	84	0	0	0	0	yes
adlib_Sample_3893_AT_7	AGCATCACACATGTTG-1	adlib	ad_libitum_fed	Singlet	neuron	magnaclass2	0	0	0	0	0	0	0	0	0	0	1	0		1	21	0	0	0	0	0	0	0	0	0	no
adlib_Sample_3893_AT_7	AGCATCATCACACCCT-1	adlib	ad_libitum_fed	Singlet	neuron	Sall3_class	0	0	0	0	0	0	0	0	0	0	0	0		0	0	0	0	0	0	0	0	0	0	0	no
adlib_Sample_3893_AT_7	AGCATCATCTCAGGCG-1	adlib	ad_libitum_fed	Singlet	neuron	magnaclass1	0	0	0	0	0	0	0	0	0	0	1	0		1	73	1	0	79	1	92	0	0	0	0	yes
adlib_Sample_3893_AT_7	AGCCAATAGTTCCTGA-1	adlib	ad_libitum_fed	Singlet	neuron	magnaclass2	0	0	0	0	0	0	0	0	0	0	0	0		0	0	0	0	0	0	0	0	0	0	0	no
adlib_Sample_3893_AT_7	AGCCAATCAAGCAGGT-1	adlib	ad_libitum_fed	Singlet	neuron	monoamine_class	0	0	1	78	1	97	0	0	0	0	1	0		1	84	1	34	0	0	0	0	0	0	0	yes
adlib_Sample_3893_AT_7	AGCCAATCACCGTGGT-1	adlib	ad_libitum_fed	Singlet	neuron	monoamine_class	0	0	1	32	1	60	0	0	0	0	0	0		0	0	1	30	0	0	0	0	0	0	0	yes
adlib_Sample_3893_AT_7	AGCCAATCATCGCTGG-1	adlib	ad_libitum_fed	Singlet	neuron	magnaclass1	0	0	0	0	0	0	0	0	0	0	1	0		1	28	1	22	78	1	13	1	33	1	30	yes
adlib_Sample_3893_AT_7	AGCCAATGTGAATAAC-1	adlib	ad_libitum_fed	Singlet	neuron	Sall3_class	0	0	0	0	0	0	0	0	0	0	0	0		0	0	0	0	0	1	95	0	0	0	0	no
adlib_Sample_3893_AT_7	AGCCAATTCATGGCCG-1	adlib	ad_libitum_fed	Singlet	neuron	magnaclass1	0	0	0	0	0	0	0	0	0	0	0	0		0	0	1	46	69	0	0	0	0	0	0	no
adlib_Sample_3893_AT_7	AGCCAATTCCATCCGT-1	adlib	ad_libitum_fed	Singlet	neuron	magnaclass1	0	0	0	0	0	0	0	0	0	0	0	0		0	0	1	72	24	1	23	0	0	1	43	yes
adlib_Sample_3893_AT_7	AGCCAATTCGGATAAA-1	adlib	ad_libitum_fed	Singlet	neuron	Sall3_class	0	0	0	0	0	0	0	0	0	0	0	0		0	0	1	0	72	0	0	0	0	0	0	no
adlib_Sample_3893_AT_7	AGCCACGCACAGGATG-1	adlib	ad_libitum_fed	Singlet	neuron	monoamine_class	0	0	0	0	0	0	0	0	0	0	0	0		0	0	0	0	0	0	0	1	70	0	0	no
adlib_Sample_3893_AT_7	AGCCACGGTAACTTCG-1	adlib	ad_libitum_fed	Singlet	neuron	magnaclass2	0	0	0	0	0	0	0	0	0	0	1	0		1	64	1	51	0	0	0	0	0	0	0	yes
adlib_Sample_3893_AT_7	AGCCACGTCAAACCTG-1	adlib	ad_libitum_fed	Singlet	neuron	monoamine_class	0	0	0	0	0	0	0	0	0	0	1	0		1	89	0	0	0	0	0	0	0	0	0	no
adlib_Sample_3893_AT_7	AGCCACGTCAAGAGTA-1	adlib	ad_libitum_fed	Singlet	neuron	magnaclass1	0	0	0	0	0	0	0	0	0	0	0	0		0	0	1	0	92	1	35	0	0	0	0	yes
adlib_Sample_3893_AT_7	AGCCACGTCCAAGCTA-1	adlib	ad_libitum_fed	Singlet	neuron	monoamine_class	0	0	0	0	0	0	0	0	0	0	0	0		0	0	0	0	0	0	0	0	0	0	0	no
adlib_Sample_3893_AT_7	AGCCACGTCTTCGGAA-1	adlib	ad_libitum_fed	Singlet	neuron	Lhx2_class	0	0	0	0	0	0	0	0	0	0	1	0		1	66	0	0	0	0	0	0	0	0	0	no
adlib_Sample_3893_AT_7	AGCCAGCAGCCAGTAG-1	adlib	ad_libitum_fed	Singlet	neuron	Lhx2_class	0	0	0	0	0	0	0	0	0	0	0	0		0	0	0	0	0	0	0	0	0	0	0	no
adlib_Sample_3893_AT_7	AGCCAGCAGGAAGAAC-1	adlib	ad_libitum_fed	Singlet	neuron	magnaclass2	0	0	0	0	0	0	0	0	0	0	0	0		0	0	0	0	0	0	0	0	0	0	0	no
adlib_Sample_3893_AT_7	AGCCAGCAGGTGCCAA-1	adlib	ad_libitum_fed	Singlet	neuron	Golli_class	0	0	0	0	0	0	0	0	0	0	1	0		1	82	0	0	0	1	57	0	0	1	41	yes
adlib_Sample_3893_AT_7	AGCCAGCCAGTGGCTC-1	adlib	ad_libitum_fed	Singlet	neuron	monoamine_class	0	0	0	0	0	0	0	0	0	0	0	0		0	0	0	0	0	1	16	0	0	0	0	no
adlib_Sample_3893_AT_7	AGCCAGCCATGCACTA-1	adlib	ad_libitum_fed	Singlet	neuron	magnaclass1	0	0	0	0	0	0	0	0	0	0	0	0		0	0	1	97	80	1	46	0	0	0	0	yes
adlib_Sample_3893_AT_7	AGCCAGCGTATAATGG-1	adlib	ad_libitum_fed	Singlet	neuron	Lrmda_class	0	0	0	0	0	0	0	0	0	0	1	0		1	44	1	71	0	0	0	0	0	0	0	yes
adlib_Sample_3893_AT_7	AGCCAGCGTCCGGCAT-1	adlib	ad_libitum_fed	Singlet	neuron	magnaclass2	0	0	0	0	0	0	0	0	0	0	1	0		1	36	0	0	0	0	0	0	0	0	0	no
adlib_Sample_3893_AT_7	AGCCAGCTCGGCATTA-1	adlib	ad_libitum_fed	Singlet	neuron	Sall3_class	0	0	0	0	1	65	0	0	0	0	0	0		0	0	1	35	0	1	24	1	77	0	0	yes
adlib_Sample_3893_AT_7	AGCGATTAGAGATGCC-1	adlib	ad_libitum_fed	Singlet	neuron	magnaclass1	0	0	0	0	0	0	0	0	0	0	1	0		1	43	1	33	23	1	79	0	0	1	42	yes
adlib_Sample_3893_AT_7	AGCGATTAGCTCCCTT-1	adlib	ad_libitum_fed	Singlet	neuron	magnaclass2	0	0	0	0	1	42	0	0	0	0	1	0		1	20	0	0	0	0	0	0	0	0	0	yes
adlib_Sample_3893_AT_7	AGCGATTAGTGATAAC-1	adlib	ad_libitum_fed	Singlet	neuron	Sall3_class	0	0	0	0	0	0	0	0	0	0	0	0		0	0	0	0	0	0	0	0	0	0	0	no
adlib_Sample_3893_AT_7	AGCGATTAGTTAGTAG-1	adlib	ad_libitum_fed	Singlet	neuron	magnaclass2	0	0	0	0	1	33	0	0	0	0	1	0		1	13	0	0	0	0	0	1	19	1	17	yes
adlib_Sample_3893_AT_7	AGCGATTCAATTAGGA-1	adlib	ad_libitum_fed	Singlet	neuron	Lrmda_class	0	0	0	0	0	0	0	0	0	0	0	0		0	0	1	39	62	0	0	0	0	1	78	yes
adlib_Sample_3893_AT_7	AGCGATTCATCTCATT-1	adlib	ad_libitum_fed	Singlet	neuron	magnaclass1	0	0	0	0	0	0	0	0	0	0	1	0		1	35	1	64	18	1	73	0	0	0	0	yes
adlib_Sample_3893_AT_7	AGCGATTGTGGTCTAT-1	adlib	ad_libitum_fed	Singlet	neuron	monoamine_class	0	0	1	39	0	0	0	0	0	0	1	0		1	50	0	0	0	0	0	0	0	0	0	yes
adlib_Sample_3893_AT_7	AGCGCCAAGCCATTCA-1	adlib	ad_libitum_fed	Singlet	neuron	Lhx2_class	0	0	0	0	0	0	0	0	0	0	1	0		1	12	0	0	0	0	0	0	0	1	17	yes
adlib_Sample_3893_AT_7	AGCGCCAAGTCTTCGA-1	adlib	ad_libitum_fed	Singlet	neuron	Lrmda_class	0	0	0	0	0	0	0	0	0	0	1	0		1	83	0	0	0	1	9	0	0	0	0	yes
adlib_Sample_3893_AT_7	AGCGCTGAGGCTTAAA-1	adlib	ad_libitum_fed	Singlet	neuron	monoamine_class	1	99	1	51	1	97	0	0	0	0	1	0		1	66	1	0	96	1	39	0	0	0	0	yes
adlib_Sample_3893_AT_7	AGCGCTGGTAGCTTTG-1	adlib	ad_libitum_fed	Singlet	neuron	magnaclass1	0	0	0	0	0	0	0	0	0	0	0	0		0	0	1	76	61	0	0	0	0	0	0	no
adlib_Sample_3893_AT_7	AGCGCTGTCTCCGTGT-1	adlib	ad_libitum_fed	Singlet	neuron	magnaclass2	0	0	0	0	0	0	0	0	0	0	1	0		1	84	0	0	0	0	0	1	46	0	0	yes
adlib_Sample_3893_AT_7	AGCGTATAGCTGAAAT-1	adlib	ad_libitum_fed	Singlet	neuron	monoamine_class	0	0	0	0	0	0	0	0	0	0	1	0		1	97	0	0	0	0	0	0	0	0	0	no
adlib_Sample_3893_AT_7	AGCGTATAGGTCCCTG-1	adlib	ad_libitum_fed	Singlet	neuron	magnaclass2	0	0	0	0	0	0	0	0	0	0	0	0		0	0	1	41	30	0	0	0	0	0	0	no
adlib_Sample_3893_AT_7	AGCGTATCACACAGCC-1	adlib	ad_libitum_fed	Singlet	neuron	magnaclass2	0	0	0	0	0	0	0	0	0	0	0	0		0	0	1	0	26	0	0	0	0	0	0	no
adlib_Sample_3893_AT_7	AGCGTATCATAGACTC-1	adlib	ad_libitum_fed	Singlet	neuron	magnaclass2	0	0	0	0	0	0	0	0	0	0	1	0		1	98	0	0	0	0	0	0	0	0	0	no
adlib_Sample_3893_AT_7	AGCGTATTCAAAGCCT-1	adlib	ad_libitum_fed	Singlet	neuron	Lrmda_class	0	0	0	0	0	0	0	0	0	0	0	0		0	0	1	55	40	0	0	1	64	0	0	yes
adlib_Sample_3893_AT_7	AGCGTATTCTTCCACG-1	adlib	ad_libitum_fed	Singlet	neuron	corelautus_class	0	0	0	0	0	0	0	0	0	0	0	0		0	0	1	98	69	0	0	0	0	0	0	no
adlib_Sample_3893_AT_7	AGCGTCGAGTCCTGCG-1	adlib	ad_libitum_fed	Singlet	neuron	corelautus_class	0	0	0	0	0	0	0	0	0	0	0	0		0	0	0	0	0	0	0	0	0	0	0	no
adlib_Sample_3893_AT_7	AGCGTCGCACGGTGAA-1	adlib	ad_libitum_fed	Singlet	neuron	Lrmda_class	0	0	0	0	0	0	0	0	0	0	0	0		0	0	1	0	63	1	66	0	0	0	0	yes
adlib_Sample_3893_AT_7	AGCTACACATTGAGCT-1	adlib	ad_libitum_fed	Singlet	neuron	magnaclass1	0	0	0	0	0	0	0	0	0	0	0	0		0	0	1	59	78	1	68	0	0	0	0	yes
adlib_Sample_3893_AT_7	AGCTCAAAGATGCGAC-1	adlib	ad_libitum_fed	Singlet	neuron	magnaclass1	0	0	0	0	0	0	0	0	0	0	1	0		1	33	1	63	69	1	16	0	0	0	0	yes
adlib_Sample_3893_AT_7	AGCTCAAGTCGTACAT-1	adlib	ad_libitum_fed	Singlet	neuron	magnaclass2	0	0	0	0	0	0	0	0	0	0	1	0		1	79	0	0	0	0	0	0	0	0	0	no
adlib_Sample_3893_AT_7	AGCTCAAGTTGGACCC-1	adlib	ad_libitum_fed	Singlet	neuron	magnaclass2	0	0	1	44	1	74	0	0	0	0	0	0		0	0	0	0	0	0	0	0	0	0	0	no
adlib_Sample_3893_AT_7	AGCTCAATCGTCAGAT-1	adlib	ad_libitum_fed	Singlet	neuron	Lrmda_class	0	0	0	0	0	0	0	0	0	0	1	0		1	27	1	0	3	1	55	0	0	0	0	yes
adlib_Sample_3893_AT_7	AGCTTCCAGCCGTTGC-1	adlib	ad_libitum_fed	Singlet	neuron	magnaclass1	0	0	0	0	0	0	0	0	0	0	1	0		1	10	1	58	69	1	24	0	0	0	0	yes
adlib_Sample_3893_AT_7	AGCTTCCCATGAGATA-1	adlib	ad_libitum_fed	Singlet	neuron	corelautus_class	0	0	0	0	0	0	0	0	0	0	0	0		0	0	0	0	0	0	0	0	0	0	0	no
adlib_Sample_3893_AT_7	AGCTTCCCATGCCATA-1	adlib	ad_libitum_fed	Singlet	neuron	magnaclass1	0	0	0	0	0	0	0	0	0	0	0	0		0	0	1	59	44	1	82	0	0	0	0	yes
adlib_Sample_3893_AT_7	AGCTTCCGTGATTAGA-1	adlib	ad_libitum_fed	Singlet	neuron	magnaclass1	0	0	0	0	0	0	0	0	0	0	1	0		1	67	1	54	0	1	78	0	0	1	97	yes
adlib_Sample_3893_AT_7	AGCTTCCTCACGTCCT-1	adlib	ad_libitum_fed	Singlet	neuron	Lhx2_class	0	0	0	0	0	0	0	0	0	0	1	0		1	65	0	0	0	0	0	0	0	0	0	no
adlib_Sample_3893_AT_7	AGGAAATAGACTCTAC-1	adlib	ad_libitum_fed	Singlet	neuron	magnaclass1	0	0	0	0	0	0	0	0	0	0	0	0		0	0	1	42	83	1	7	0	0	0	0	yes
adlib_Sample_3893_AT_7	AGGAAATAGCTGTACT-1	adlib	ad_libitum_fed	Singlet	neuron	magnaclass2	0	0	0	0	0	0	0	0	0	0	0	0		0	0	0	0	0	0	0	0	0	0	0	no
adlib_Sample_3893_AT_7	AGGAAATCACCGCTAG-1	adlib	ad_libitum_fed	Singlet	neuron	Sall3_class	0	0	0	0	0	0	0	0	0	0	0	0		0	0	1	0	26	1	63	0	0	0	0	yes
adlib_Sample_3893_AT_7	AGGAAATCACTCAAGT-1	adlib	ad_libitum_fed	Singlet	neuron	magnaclass2	0	0	0	0	0	0	0	0	0	0	0	0		0	0	0	0	0	0	0	0	0	0	0	no
adlib_Sample_3893_AT_7	AGGAAATCAGCGGTTC-1	adlib	ad_libitum_fed	Singlet	neuron	magnaclass2	0	0	0	0	0	0	0	0	0	0	0	0		0	0	0	0	0	0	0	0	0	1	98	no
adlib_Sample_3893_AT_7	AGGAAATCAGGTGTGA-1	adlib	ad_libitum_fed	Singlet	neuron	magnaclass2	0	0	0	0	0	0	0	0	0	0	0	0		0	0	0	0	0	0	0	1	29	1	27	yes
adlib_Sample_3893_AT_7	AGGAAATTCCGTGGTG-1	adlib	ad_libitum_fed	Singlet	neuron	magnaclass2	0	0	0	0	0	0	0	0	0	0	1	0		1	45	0	0	0	0	0	0	0	1	75	yes
adlib_Sample_3893_AT_7	AGGAATAAGGCACAAC-1	adlib	ad_libitum_fed	Singlet	neuron	magnaclass1	0	0	0	0	0	0	0	0	0	0	0	0		0	0	0	0	0	0	0	0	0	0	0	no
adlib_Sample_3893_AT_7	AGGAATATCTAGCCTC-1	adlib	ad_libitum_fed	Singlet	neuron	magnaclass1	0	0	0	0	0	0	0	0	1	67	0	0		0	0	1	0	45	0	0	0	0	1	65	yes
adlib_Sample_3893_AT_7	AGGACGATCAGGGTAG-1	adlib	ad_libitum_fed	Singlet	neuron	Lhx2_class	0	0	0	0	0	0	0	0	0	0	0	0		0	0	0	0	0	0	0	0	0	0	0	no
adlib_Sample_3893_AT_7	AGGACGATCATGTCAG-1	adlib	ad_libitum_fed	Singlet	neuron	monoamine_class	0	0	0	0	0	0	0	0	0	0	0	0		0	0	0	0	0	0	0	0	0	0	0	no
adlib_Sample_3893_AT_7	AGGACGATCGTAGGGA-1	adlib	ad_libitum_fed	Singlet	neuron	Lrmda_class	0	0	0	0	0	0	0	0	0	0	0	0		0	0	1	41	29	1	29	0	0	0	0	yes
adlib_Sample_3893_AT_7	AGGACTTAGCTGAGTG-1	adlib	ad_libitum_fed	Singlet	neuron	magnaclass2	0	0	0	0	0	0	0	0	0	0	1	0		1	27	0	0	0	0	0	0	0	1	29	yes
adlib_Sample_3893_AT_7	AGGACTTAGTCGCGAA-1	adlib	ad_libitum_fed	Singlet	neuron	magnaclass1	0	0	0	0	0	0	0	0	0	0	1	0		1	96	1	99	0	1	98	0	0	0	0	yes
adlib_Sample_3893_AT_7	AGGACTTAGTTCGCAT-1	adlib	ad_libitum_fed	Singlet	neuron	corelautus_class	0	0	0	0	0	0	0	0	0	0	0	0		0	0	0	0	0	0	0	0	0	0	0	no
adlib_Sample_3893_AT_7	AGGACTTCAGAGTGAC-1	adlib	ad_libitum_fed	Singlet	neuron	Sall3_class	0	0	0	0	0	0	0	0	0	0	1	0		1	95	0	0	0	1	22	0	0	0	0	yes
adlib_Sample_3893_AT_7	AGGACTTCAGTTGCGC-1	adlib	ad_libitum_fed	Singlet	neuron	Lrmda_class	0	0	0	0	1	62	0	0	0	0	0	0		0	0	1	0	75	1	97	0	0	1	41	yes
adlib_Sample_3893_AT_7	AGGACTTGTGATGTAA-1	adlib	ad_libitum_fed	Singlet	neuron	monoamine_class	0	0	0	0	0	0	0	0	0	0	1	0		1	66	0	0	0	0	0	0	0	0	0	no
adlib_Sample_3893_AT_7	AGGACTTGTGCACATT-1	adlib	ad_libitum_fed	Singlet	neuron	Lrmda_class	0	0	0	0	1	31	0	0	0	0	0	0		0	0	1	0	45	1	97	0	0	0	0	yes
adlib_Sample_3893_AT_7	AGGAGGTCAGTAGTGG-1	adlib	ad_libitum_fed	Singlet	neuron	monoamine_class	0	0	0	0	0	0	0	0	0	0	1	0		1	84	0	0	0	0	0	0	0	0	0	no
adlib_Sample_3893_AT_7	AGGAGGTGTGAGATTA-1	adlib	ad_libitum_fed	Singlet	neuron	magnaclass1	0	0	0	0	0	0	0	0	0	0	1	0		1	96	0	0	0	0	0	0	0	0	0	no
adlib_Sample_3893_AT_7	AGGATAAAGCCGTCGT-1	adlib	ad_libitum_fed	Singlet	neuron	magnaclass1	0	0	0	0	0	0	0	0	0	0	1	0		1	97	0	0	0	1	87	0	0	0	0	yes
adlib_Sample_3893_AT_7	AGGATAAGTAAGTTGA-1	adlib	ad_libitum_fed	Singlet	neuron	magnaclass1	0	0	0	0	1	47	0	0	0	0	0	0		0	0	1	0	13	1	64	0	0	0	0	yes
adlib_Sample_3893_AT_7	AGGATAAGTGTGAATA-1	adlib	ad_libitum_fed	Singlet	neuron	magnaclass1	0	0	0	0	0	0	0	0	0	0	0	0		0	0	1	0	89	0	0	0	0	0	0	no
adlib_Sample_3893_AT_7	AGGATAATCATTACCT-1	adlib	ad_libitum_fed	Singlet	neuron	Sall3_class	0	0	0	0	0	0	0	0	0	0	1	0		1	90	1	80	0	0	0	0	0	0	0	yes
adlib_Sample_3893_AT_7	AGGATCTCATGAATAG-1	adlib	ad_libitum_fed	Singlet	neuron	Lhx2_class	0	0	0	0	0	0	0	0	0	0	1	0		1	35	0	0	0	0	0	0	0	0	0	no
adlib_Sample_3893_AT_7	AGGATCTTCATTACTC-1	adlib	ad_libitum_fed	Singlet	neuron	monoamine_class	0	0	1	74	0	0	0	0	0	0	0	0		0	0	0	0	0	0	0	0	0	0	0	no
adlib_Sample_3893_AT_7	AGGCATTGTAGGGAGG-1	adlib	ad_libitum_fed	Singlet	neuron	Sall3_class	0	0	0	0	0	0	0	0	0	0	0	0		0	0	0	0	0	1	63	0	0	0	0	no
adlib_Sample_3893_AT_7	AGGCCACAGTGCCGAA-1	adlib	ad_libitum_fed	Singlet	neuron	magnaclass1	0	0	0	0	0	0	0	0	0	0	1	0		1	25	1	54	40	0	0	0	0	0	0	yes
adlib_Sample_3893_AT_7	AGGCCACCAGAGTGTG-1	adlib	ad_libitum_fed	Singlet	neuron	Lhx2_class	0	0	0	0	0	0	0	0	0	0	0	0		0	0	0	0	0	0	0	0	0	0	0	no
adlib_Sample_3893_AT_7	AGGCCACTCGCACGAC-1	adlib	ad_libitum_fed	Singlet	neuron	magnaclass1	0	0	0	0	0	0	0	0	0	0	0	0		0	0	1	71	23	1	22	0	0	0	0	yes
adlib_Sample_3893_AT_7	AGGCTGCAGACAACTA-1	adlib	ad_libitum_fed	Singlet	neuron	Lrmda_class	0	0	0	0	0	0	0	0	0	0	1	0		1	52	1	0	3	1	74	0	0	0	0	yes
adlib_Sample_3893_AT_7	AGGCTGCAGCAGTACG-1	adlib	ad_libitum_fed	Singlet	neuron	magnaclass2	0	0	0	0	0	0	0	0	0	0	0	0		0	0	0	0	0	0	0	0	0	0	0	no
adlib_Sample_3893_AT_7	AGGCTGCGTCGTTGGC-1	adlib	ad_libitum_fed	Singlet	neuron	magnaclass1	0	0	0	0	0	0	0	0	0	0	1	0		1	70	0	0	0	0	0	0	0	0	0	no
adlib_Sample_3893_AT_7	AGGGAGTAGACCAACG-1	adlib	ad_libitum_fed	Singlet	neuron	magnaclass2	0	0	0	0	0	0	0	0	0	0	1	0		1	83	0	0	0	0	0	0	0	0	0	no
adlib_Sample_3893_AT_7	AGGGAGTAGCACGATG-1	adlib	ad_libitum_fed	Singlet	neuron	magnaclass1	0	0	1	18	1	40	0	0	0	0	1	0		1	19	1	89	86	1	8	0	0	1	73	yes
adlib_Sample_3893_AT_7	AGGGAGTCATCGTTCC-1	adlib	ad_libitum_fed	Singlet	neuron	monoamine_class	0	0	1	66	0	0	1	79	0	0	0	0		0	0	0	0	0	0	0	0	0	0	0	no
adlib_Sample_3893_AT_7	AGGGAGTGTAACATAG-1	adlib	ad_libitum_fed	Singlet	neuron	monoamine_class	0	0	0	0	0	0	0	0	0	0	0	0		0	0	0	0	0	0	0	0	0	0	0	no
adlib_Sample_3893_AT_7	AGGGAGTTCACGGAGA-1	adlib	ad_libitum_fed	Singlet	neuron	monoamine_class	1	53	1	83	0	0	0	0	0	0	0	0		0	0	0	0	0	0	0	0	0	0	0	no
adlib_Sample_3893_AT_7	AGGGAGTTCCACACAA-1	adlib	ad_libitum_fed	Singlet	neuron	monoamine_class	0	0	1	70	0	0	0	0	0	0	0	0		0	0	0	0	0	0	0	0	0	0	0	no
adlib_Sample_3893_AT_7	AGGGAGTTCCCGAAAT-1	adlib	ad_libitum_fed	Singlet	neuron	magnaclass2	0	0	0	0	0	0	0	0	0	0	1	0		1	53	0	0	0	0	0	0	0	1	49	yes
adlib_Sample_3893_AT_7	AGGGAGTTCGAGGCAA-1	adlib	ad_libitum_fed	Singlet	neuron	monoamine_class	0	0	0	0	0	0	0	0	0	0	0	0		0	0	1	0	45	0	0	1	68	0	0	yes
adlib_Sample_3893_AT_7	AGGGAGTTCTACGGGC-1	adlib	ad_libitum_fed	Singlet	neuron	monoamine_class	0	0	0	0	0	0	0	0	0	0	0	0		0	0	0	0	0	0	0	0	0	0	0	no
adlib_Sample_3893_AT_7	AGGGCCTCAAAGGCTG-1	adlib	ad_libitum_fed	Singlet	neuron	monoamine_class	0	0	0	0	0	0	0	0	0	0	0	0		0	0	0	0	0	0	0	0	0	0	0	no
adlib_Sample_3893_AT_7	AGGGCCTCACTGAGGA-1	adlib	ad_libitum_fed	Singlet	neuron	magnaclass2	0	0	0	0	0	0	0	0	0	0	0	0		0	0	0	0	0	0	0	0	0	1	92	no
adlib_Sample_3893_AT_7	AGGGCCTCATACGCAT-1	adlib	ad_libitum_fed	Singlet	neuron	magnaclass1	0	0	0	0	0	0	0	0	0	0	1	0		1	38	1	67	20	1	54	0	0	0	0	yes
adlib_Sample_3893_AT_7	AGGGCCTTCCATTCGC-1	adlib	ad_libitum_fed	Singlet	neuron	Sall3_class	0	0	0	0	1	44	0	0	0	0	0	0		0	0	0	0	0	1	76	0	0	0	0	yes
adlib_Sample_3893_AT_7	AGGGCTCAGGAATCGC-1	adlib	ad_libitum_fed	Singlet	neuron	magnaclass1	0	0	0	0	0	0	0	0	0	0	1	0		1	81	1	0	54	1	20	0	0	1	40	yes
adlib_Sample_3893_AT_7	AGGGCTCAGTCACGCC-1	adlib	ad_libitum_fed	Singlet	neuron	Lhx2_class	0	0	0	0	1	57	0	0	0	0	0	0		0	0	0	0	0	0	0	1	39	1	69	yes
adlib_Sample_3893_AT_7	AGGGCTCCACTGAGTT-1	adlib	ad_libitum_fed	Singlet	neuron	magnaclass2	0	0	0	0	0	0	0	0	0	0	0	0		0	0	0	0	0	0	0	1	33	1	87	yes
adlib_Sample_3893_AT_7	AGGGCTCTCCGATCTC-1	adlib	ad_libitum_fed	Singlet	neuron	magnaclass1	0	0	0	0	0	0	0	0	0	0	0	0		0	0	1	34	0	0	0	0	0	0	0	no
adlib_Sample_3893_AT_7	AGGGCTCTCGCCGTGA-1	adlib	ad_libitum_fed	Singlet	neuron	magnaclass2	0	0	0	0	0	0	0	0	0	0	1	0		1	62	0	0	0	0	0	0	0	1	83	yes
adlib_Sample_3893_AT_7	AGGGTCCAGGCATCGA-1	adlib	ad_libitum_fed	Singlet	neuron	Lrmda_class	0	0	0	0	0	0	0	0	0	0	1	0		1	14	0	0	0	1	90	0	0	0	0	yes
adlib_Sample_3893_AT_7	AGGGTGAAGAGGTCAC-1	adlib	ad_libitum_fed	Singlet	neuron	magnaclass2	0	0	0	0	0	0	0	0	0	0	1	0		1	60	0	0	0	0	0	0	0	1	55	yes
adlib_Sample_3893_AT_7	AGGGTGAAGCGTGAAC-1	adlib	ad_libitum_fed	Singlet	neuron	magnaclass1	0	0	0	0	0	0	0	0	0	0	0	0		0	0	1	0	37	0	0	0	0	0	0	no
adlib_Sample_3893_AT_7	AGGGTGACAATAGTCC-1	adlib	ad_libitum_fed	Singlet	neuron	magnaclass1	0	0	0	0	0	0	0	0	0	0	1	0		1	34	1	64	0	1	17	0	0	0	0	yes
adlib_Sample_3893_AT_7	AGGGTGACACGTGAGA-1	adlib	ad_libitum_fed	Singlet	neuron	Sall3_class	0	0	0	0	0	0	0	0	0	0	0	0		0	0	1	0	36	0	0	0	0	0	0	no
adlib_Sample_3893_AT_7	AGGGTGACATCACGGC-1	adlib	ad_libitum_fed	Singlet	neuron	magnaclass2	0	0	0	0	0	0	0	0	0	0	0	0		0	0	0	0	0	0	0	0	0	0	0	no
adlib_Sample_3893_AT_7	AGGGTGAGTACCGGAA-1	adlib	ad_libitum_fed	Singlet	neuron	magnaclass1	0	0	0	0	0	0	0	0	0	0	1	0		1	84	1	0	24	0	0	0	0	0	0	yes
adlib_Sample_3893_AT_7	AGGGTGATCCGTCAAA-1	adlib	ad_libitum_fed	Singlet	neuron	magnaclass1	0	0	0	0	0	0	0	0	0	0	0	0		0	0	0	0	0	0	0	0	0	0	0	no
adlib_Sample_3893_AT_7	AGGGTTTAGTGCTACT-1	adlib	ad_libitum_fed	Singlet	neuron	Lrmda_class	0	0	0	0	0	0	0	0	0	0	1	0		1	69	0	0	0	0	0	0	0	0	0	no
adlib_Sample_3893_AT_7	AGGGTTTCATGTCGTA-1	adlib	ad_libitum_fed	Singlet	neuron	magnaclass2	0	0	0	0	0	0	0	0	0	0	1	0		1	48	0	0	0	0	0	0	0	0	0	no
adlib_Sample_3893_AT_7	AGGGTTTGTTCTTAGG-1	adlib	ad_libitum_fed	Singlet	neuron	magnaclass2	0	0	0	0	0	0	0	0	0	0	0	0		0	0	0	0	0	0	0	0	0	1	33	no
adlib_Sample_3893_AT_7	AGGTAGGCACACGTGC-1	adlib	ad_libitum_fed	Singlet	neuron	magnaclass1	0	0	0	0	0	0	0	0	0	0	0	0		0	0	1	98	0	0	0	0	0	0	0	no
adlib_Sample_3893_AT_7	AGGTAGGCAGAGGACT-1	adlib	ad_libitum_fed	Singlet	neuron	monoamine_class	0	0	1	72	0	0	0	0	0	0	1	0		1	90	0	0	0	0	0	0	0	0	0	yes
adlib_Sample_3893_AT_7	AGGTAGGTCTGGAGAG-1	adlib	ad_libitum_fed	Singlet	neuron	Lhx2_class	0	0	0	0	1	78	0	0	0	0	1	0		1	64	0	0	0	0	0	0	0	0	0	yes
adlib_Sample_3893_AT_7	AGGTCATAGCCAACCC-1	adlib	ad_libitum_fed	Singlet	neuron	magnaclass1	0	0	0	0	0	0	0	0	0	0	1	0		1	9	1	8	82	1	21	0	0	0	0	yes
adlib_Sample_3893_AT_7	AGGTCATAGCTTTGTG-1	adlib	ad_libitum_fed	Singlet	neuron	magnaclass2	0	0	0	0	0	0	0	0	0	0	1	0		1	81	1	0	54	0	0	0	0	0	0	yes
adlib_Sample_3893_AT_7	AGGTCATCAATGTGGG-1	adlib	ad_libitum_fed	Singlet	neuron	Lhx2_class	0	0	0	0	1	19	0	0	0	0	0	0		0	0	1	0	46	0	0	0	0	0	0	yes
adlib_Sample_3893_AT_7	AGGTCATCACCCAATA-1	adlib	ad_libitum_fed	Singlet	neuron	Lrmda_class	0	0	0	0	0	0	0	0	0	0	0	0		0	0	0	0	0	1	22	0	0	0	0	no
adlib_Sample_3893_AT_7	AGGTCATGTCGCACAC-1	adlib	ad_libitum_fed	Singlet	neuron	magnaclass2	0	0	0	0	0	0	0	0	0	0	0	0		0	0	0	0	0	0	0	1	32	0	0	no
adlib_Sample_3893_AT_7	AGGTCATGTGAGTAAT-1	adlib	ad_libitum_fed	Singlet	neuron	magnaclass1	0	0	0	0	0	0	0	0	0	0	0	0		0	0	1	92	31	0	0	0	0	1	52	yes
adlib_Sample_3893_AT_7	AGGTCATTCACTCGAA-1	adlib	ad_libitum_fed	Singlet	neuron	magnaclass1	0	0	0	0	0	0	0	0	0	0	1	0		1	32	1	61	4	1	48	0	0	0	0	yes
adlib_Sample_3893_AT_7	AGGTCATTCTCTATGT-1	adlib	ad_libitum_fed	Singlet	neuron	magnaclass1	0	0	0	0	1	58	0	0	0	0	1	0		1	37	1	29	91	0	0	1	40	0	0	yes
adlib_Sample_3893_AT_7	AGGTCTACAAGCTCTA-1	adlib	ad_libitum_fed	Singlet	neuron	magnaclass2	0	0	0	0	0	0	0	0	0	0	1	0		1	75	0	0	0	0	0	0	0	0	0	no
adlib_Sample_3893_AT_7	AGGTCTAGTGGATCAG-1	adlib	ad_libitum_fed	Singlet	neuron	magnaclass2	0	0	0	0	0	0	0	0	0	0	0	0		0	0	0	0	0	0	0	0	0	0	0	no
adlib_Sample_3893_AT_7	AGGTCTAGTTCCAAAC-1	adlib	ad_libitum_fed	Singlet	neuron	magnaclass1	0	0	0	0	0	0	0	0	0	0	0	0		0	0	1	33	0	1	22	0	0	0	0	yes
adlib_Sample_3893_AT_7	AGGTCTATCTCGGTCT-1	adlib	ad_libitum_fed	Singlet	neuron	Lhx2_class	0	0	0	0	0	0	0	0	0	0	1	0		1	13	0	0	0	0	0	0	0	0	0	no
adlib_Sample_3893_AT_7	AGGTGTTAGCTCCACG-1	adlib	ad_libitum_fed	Singlet	neuron	monoamine_class	0	0	1	64	0	0	0	0	0	0	1	0		1	42	0	0	0	0	0	0	0	0	0	yes
adlib_Sample_3893_AT_7	AGGTGTTCAGCTACAT-1	adlib	ad_libitum_fed	Singlet	neuron	magnaclass2	0	0	0	0	0	0	0	0	0	0	0	0		0	0	0	0	0	0	0	0	0	0	0	no
adlib_Sample_3893_AT_7	AGGTGTTGTGATTAGA-1	adlib	ad_libitum_fed	Singlet	neuron	monoamine_class	0	0	0	0	0	0	0	0	0	0	0	0		0	0	0	0	0	0	0	0	0	0	0	no
adlib_Sample_3893_AT_7	AGGTGTTGTTAGGGTG-1	adlib	ad_libitum_fed	Singlet	neuron	Sall3_class	0	0	0	0	0	0	0	0	0	0	0	0		0	0	0	0	0	1	95	0	0	0	0	no
adlib_Sample_3893_AT_7	AGGTGTTTCAGTCTTT-1	adlib	ad_libitum_fed	Singlet	neuron	magnaclass1	0	0	0	0	0	0	0	0	0	0	1	0		1	49	1	75	60	1	63	0	0	0	0	yes
adlib_Sample_3893_AT_7	AGGTGTTTCGGAGTAG-1	adlib	ad_libitum_fed	Singlet	neuron	Sall3_class	0	0	0	0	0	0	0	0	0	0	0	0		0	0	1	78	64	0	0	0	0	0	0	no
adlib_Sample_3893_AT_7	AGGTGTTTCTGGGCGT-1	adlib	ad_libitum_fed	Singlet	neuron	magnaclass2	0	0	0	0	0	0	0	0	0	0	1	0		1	42	0	0	0	0	0	0	0	0	0	no
adlib_Sample_3893_AT_7	AGGTTACGTAGGATAT-1	adlib	ad_libitum_fed	Singlet	neuron	magnaclass2	0	0	0	0	0	0	0	0	0	0	0	0		0	0	0	0	0	0	0	1	31	0	0	no
adlib_Sample_3893_AT_7	AGGTTACTCACCTGTC-1	adlib	ad_libitum_fed	Singlet	neuron	magnaclass2	0	0	0	0	0	0	0	0	0	0	0	0		0	0	1	0	14	0	0	0	0	0	0	no
adlib_Sample_3893_AT_7	AGGTTGTAGGCCGCTT-1	adlib	ad_libitum_fed	Singlet	neuron	monoamine_class	0	0	1	21	0	0	0	0	0	0	1	0		1	22	0	0	0	0	0	0	0	0	0	yes
adlib_Sample_3893_AT_7	AGGTTGTGTACCTAAC-1	adlib	ad_libitum_fed	Singlet	neuron	magnaclass1	0	0	0	0	0	0	0	0	0	0	0	0		0	0	1	0	37	0	0	0	0	0	0	no
adlib_Sample_3893_AT_7	AGGTTGTGTATCCTCC-1	adlib	ad_libitum_fed	Singlet	neuron	magnaclass2	0	0	0	0	0	0	0	0	0	0	1	0		1	72	0	0	0	0	0	0	0	0	0	no
adlib_Sample_3893_AT_7	AGGTTGTTCATTCCTA-1	adlib	ad_libitum_fed	Singlet	neuron	monoamine_class	0	0	0	0	0	0	0	0	0	0	0	0		0	0	0	0	0	0	0	1	58	0	0	no
adlib_Sample_3893_AT_7	AGTAACCGTCGTCTCT-1	adlib	ad_libitum_fed	Singlet	neuron	Sall3_class	0	0	0	0	1	55	0	0	0	0	0	0		0	0	0	0	0	1	72	0	0	0	0	yes
adlib_Sample_3893_AT_7	AGTACCAAGTCATCCA-1	adlib	ad_libitum_fed	Singlet	neuron	corelautus_class	0	0	0	0	0	0	0	0	0	0	0	0		0	0	0	0	0	0	0	0	0	0	0	no
adlib_Sample_3893_AT_7	AGTACCACAAGCCATT-1	adlib	ad_libitum_fed	Singlet	neuron	magnaclass2	0	0	0	0	0	0	0	0	0	0	0	0		0	0	0	0	0	0	0	0	0	0	0	no
adlib_Sample_3893_AT_7	AGTACCAGTGCAAGAC-1	adlib	ad_libitum_fed	Singlet	neuron	magnaclass2	0	0	0	0	0	0	0	0	0	0	0	0		0	0	0	0	0	0	0	1	42	1	71	yes
adlib_Sample_3893_AT_7	AGTACCATCGGAGTGA-1	adlib	ad_libitum_fed	Singlet	neuron	magnaclass2	0	0	0	0	0	0	0	0	0	0	1	0		1	69	0	0	0	0	0	1	65	0	0	yes
adlib_Sample_3893_AT_7	AGTACCATCTCAGAAC-1	adlib	ad_libitum_fed	Singlet	neuron	magnaclass1	0	0	0	0	0	0	0	0	0	0	1	0		1	38	1	29	85	0	0	0	0	0	0	yes
adlib_Sample_3893_AT_7	AGTACTGCAACGTATC-1	adlib	ad_libitum_fed	Singlet	neuron	magnaclass2	0	0	0	0	0	0	0	0	0	0	0	0		0	0	1	0	86	0	0	0	0	0	0	no
adlib_Sample_3893_AT_7	AGTACTGCAAGACCGA-1	adlib	ad_libitum_fed	Singlet	neuron	monoamine_class	0	0	0	0	1	94	0	0	0	0	1	0		1	94	0	0	0	0	0	0	0	0	0	yes
adlib_Sample_3893_AT_7	AGTACTGCAGTCTACA-1	adlib	ad_libitum_fed	Singlet	neuron	magnaclass1	0	0	0	0	0	0	0	0	0	0	0	0		0	0	1	0	42	1	99	1	65	0	0	yes
adlib_Sample_3893_AT_7	AGTACTGCATGTGCTA-1	adlib	ad_libitum_fed	Singlet	neuron	Sall3_class	0	0	0	0	0	0	0	0	0	0	1	0		1	61	1	16	80	1	35	0	0	0	0	yes
adlib_Sample_3893_AT_7	AGTACTGGTACGATTC-1	adlib	ad_libitum_fed	Singlet	neuron	Lrmda_class	0	0	0	0	1	22	0	0	0	0	1	0		1	34	1	26	18	1	80	1	11	0	0	yes
adlib_Sample_3893_AT_7	AGTACTGGTCGTTATG-1	adlib	ad_libitum_fed	Singlet	neuron	magnaclass2	0	0	0	0	0	0	0	0	0	0	0	0		0	0	0	0	0	0	0	0	0	1	47	no
adlib_Sample_3893_AT_7	AGTACTGGTCTGATCA-1	adlib	ad_libitum_fed	Singlet	neuron	corelautus_class	0	0	0	0	0	0	0	0	0	0	0	0		0	0	1	0	98	0	0	0	0	0	0	no
adlib_Sample_3893_AT_7	AGTACTGTCACTGGTA-1	adlib	ad_libitum_fed	Singlet	neuron	monoamine_class	0	0	0	0	0	0	0	0	0	0	0	0		0	0	0	0	0	0	0	0	0	1	81	no
adlib_Sample_3893_AT_7	AGTAGCTAGTCAGAGC-1	adlib	ad_libitum_fed	Singlet	neuron	magnaclass1	0	0	0	0	0	0	0	0	0	0	0	0		0	0	1	0	92	1	44	0	0	1	63	yes
adlib_Sample_3893_AT_7	AGTAGCTCATCGGAAG-1	adlib	ad_libitum_fed	Singlet	neuron	magnaclass2	0	0	0	0	0	0	0	0	0	0	0	0		0	0	0	0	0	0	0	1	94	0	0	no
adlib_Sample_3893_AT_7	AGTAGCTGTATGAGAT-1	adlib	ad_libitum_fed	Singlet	neuron	magnaclass2	0	0	0	0	0	0	0	0	0	0	1	0		1	24	0	0	0	0	0	0	0	0	0	no
adlib_Sample_3893_AT_7	AGTAGTCCAATTGAGA-1	adlib	ad_libitum_fed	Singlet	neuron	magnaclass2	0	0	0	0	0	0	0	0	0	0	0	0		0	0	0	0	0	0	0	0	0	0	0	no
adlib_Sample_3893_AT_7	AGTAGTCCAGAGATTA-1	adlib	ad_libitum_fed	Singlet	neuron	magnaclass1	0	0	0	0	0	0	0	0	0	0	1	0		1	30	1	0	95	1	14	1	82	1	32	yes
adlib_Sample_3893_AT_7	AGTAGTCGTCAGATTC-1	adlib	ad_libitum_fed	Singlet	neuron	Lhx2_class	0	0	0	0	0	0	0	0	0	0	0	0		0	0	0	0	0	0	0	0	0	0	0	no
adlib_Sample_3893_AT_7	AGTCAACAGGATAATC-1	adlib	ad_libitum_fed	Singlet	neuron	magnaclass2	0	0	0	0	0	0	0	0	0	0	0	0		0	0	0	0	0	0	0	0	0	0	0	no
adlib_Sample_3893_AT_7	AGTCAACCATGACGTT-1	adlib	ad_libitum_fed	Singlet	neuron	monoamine_class	0	0	1	33	0	0	0	0	0	0	0	0		0	0	0	0	0	0	0	1	75	0	0	yes
adlib_Sample_3893_AT_7	AGTCAACGTCTGTAGT-1	adlib	ad_libitum_fed	Singlet	neuron	Lhx2_class	0	0	0	0	0	0	0	0	0	0	1	0		1	11	0	0	0	0	0	1	67	1	45	yes
adlib_Sample_3893_AT_7	AGTCAACGTCTTGGTA-1	adlib	ad_libitum_fed	Singlet	neuron	magnaclass1	0	0	0	0	0	0	0	0	0	0	0	0		0	0	1	99	0	1	99	0	0	0	0	yes
adlib_Sample_3893_AT_7	AGTCAACGTGACTCGC-1	adlib	ad_libitum_fed	Singlet	neuron	magnaclass1	0	0	0	0	0	0	0	0	0	0	0	0		0	0	0	0	0	0	0	0	0	0	0	no
adlib_Sample_3893_AT_7	AGTCAACTCGAAGCAG-1	adlib	ad_libitum_fed	Singlet	neuron	Lhx2_class	0	0	0	0	0	0	0	0	0	0	1	0		1	44	0	0	0	0	0	0	0	0	0	no
adlib_Sample_3893_AT_7	AGTCAACTCGCCATAA-1	adlib	ad_libitum_fed	Singlet	neuron	magnaclass2	0	0	0	0	0	0	0	0	0	0	0	0		0	0	0	0	0	0	0	0	0	0	0	no
adlib_Sample_3893_AT_7	AGTCAACTCTGGGCGT-1	adlib	ad_libitum_fed	Singlet	neuron	Lhx2_class	0	0	0	0	0	0	0	0	0	0	0	0		0	0	0	0	0	0	0	0	0	0	0	no
adlib_Sample_3893_AT_7	AGTCACAAGCGAGGAG-1	adlib	ad_libitum_fed	Singlet	neuron	Sall3_class	0	0	0	0	0	0	0	0	0	0	0	0		0	0	0	0	0	1	60	0	0	0	0	no
adlib_Sample_3893_AT_7	AGTCACACAAACCGGA-1	adlib	ad_libitum_fed	Singlet	neuron	monoamine_class	0	0	0	0	0	0	0	0	0	0	0	0		0	0	0	0	0	1	46	0	0	0	0	no
adlib_Sample_3893_AT_7	AGTCACAGTAGTATAG-1	adlib	ad_libitum_fed	Singlet	neuron	monoamine_class	0	0	0	0	0	0	0	0	0	0	0	0		0	0	0	0	0	0	0	0	0	0	0	no
adlib_Sample_3893_AT_7	AGTCATGGTAATGTGA-1	adlib	ad_libitum_fed	Singlet	neuron	magnaclass1	0	0	0	0	0	0	0	0	0	0	0	0		0	0	1	98	96	0	0	0	0	1	85	yes
adlib_Sample_3893_AT_7	AGTCATGGTGGAAGTC-1	adlib	ad_libitum_fed	Singlet	neuron	magnaclass1	0	0	0	0	0	0	0	0	0	0	1	0		1	51	1	0	28	1	28	0	0	0	0	yes
adlib_Sample_3893_AT_7	AGTCATGTCCAAAGGG-1	adlib	ad_libitum_fed	Singlet	neuron	magnaclass1	0	0	0	0	0	0	0	0	0	0	1	0		1	53	1	41	63	1	29	0	0	0	0	yes
adlib_Sample_3893_AT_7	AGTCATGTCTCTAGGA-1	adlib	ad_libitum_fed	Singlet	neuron	Lhx2_class	0	0	0	0	0	0	0	0	0	0	0	0		0	0	0	0	0	0	0	0	0	0	0	no
adlib_Sample_3893_AT_7	AGTCATGTCTTTGCGC-1	adlib	ad_libitum_fed	Singlet	neuron	magnaclass1	0	0	0	0	0	0	0	0	0	0	0	0		0	0	0	0	0	0	0	0	0	0	0	no
adlib_Sample_3893_AT_7	AGTCTCCAGCGTCGAA-1	adlib	ad_libitum_fed	Singlet	neuron	magnaclass1	0	0	0	0	0	0	0	0	0	0	0	0		0	0	1	0	69	0	0	0	0	0	0	no
adlib_Sample_3893_AT_7	AGTCTCCCAGTCCGTG-1	adlib	ad_libitum_fed	Singlet	neuron	Sall3_class	0	0	0	0	0	0	0	0	0	0	1	0		1	73	1	0	46	1	47	1	35	0	0	yes
adlib_Sample_3893_AT_7	AGTCTCCCATACACCA-1	adlib	ad_libitum_fed	Singlet	neuron	magnaclass2	0	0	0	0	0	0	0	0	0	0	0	0		0	0	0	0	0	0	0	0	0	1	79	no
adlib_Sample_3893_AT_7	AGTCTCCGTGGCTTGC-1	adlib	ad_libitum_fed	Singlet	neuron	Golli_class	0	0	0	0	0	0	0	0	0	0	1	0		1	45	0	0	0	1	23	0	0	0	0	yes
adlib_Sample_3893_AT_7	AGTCTCCGTTACCTGA-1	adlib	ad_libitum_fed	Singlet	neuron	magnaclass1	0	0	0	0	0	0	0	0	0	0	1	0		1	34	1	63	0	1	72	1	38	0	0	yes
adlib_Sample_3893_AT_7	AGTCTCCTCGCGATCG-1	adlib	ad_libitum_fed	Singlet	neuron	magnaclass2	0	0	0	0	1	47	0	0	0	0	1	0		1	25	0	0	0	0	0	0	0	0	0	yes
adlib_Sample_3893_AT_7	AGTGACTCACGCTGCA-1	adlib	ad_libitum_fed	Singlet	neuron	magnaclass1	0	0	0	0	1	80	0	0	0	0	0	0		0	0	0	0	0	0	0	1	64	1	60	yes
adlib_Sample_3893_AT_7	AGTGACTGTCCCACGA-1	adlib	ad_libitum_fed	Singlet	neuron	corelautus_class	0	0	0	0	0	0	0	0	0	0	0	0		0	0	0	0	0	0	0	0	0	0	0	no
adlib_Sample_3893_AT_7	AGTGACTTCTCTCTTC-1	adlib	ad_libitum_fed	Singlet	neuron	magnaclass1	0	0	0	0	0	0	0	0	0	0	0	0		0	0	1	67	3	1	12	0	0	0	0	yes
adlib_Sample_3893_AT_7	AGTGACTTCTTTGATC-1	adlib	ad_libitum_fed	Singlet	neuron	Sall3_class	0	0	0	0	0	0	0	0	0	0	1	0		1	72	1	0	88	0	0	0	0	1	32	yes
adlib_Sample_3893_AT_7	AGTGATCAGAGTCTTC-1	adlib	ad_libitum_fed	Singlet	neuron	magnaclass1	0	0	0	0	0	0	0	0	0	0	1	0		1	49	1	0	27	1	26	0	0	0	0	yes
adlib_Sample_3893_AT_7	AGTGATCAGCGGTATG-1	adlib	ad_libitum_fed	Singlet	neuron	magnaclass1	0	0	0	0	0	0	0	0	0	0	1	0		1	33	0	0	0	0	0	1	37	0	0	yes
adlib_Sample_3893_AT_7	AGTGATCGTATGTCTG-1	adlib	ad_libitum_fed	Singlet	neuron	magnaclass2	0	0	0	0	0	0	0	0	0	0	1	0		1	72	0	0	0	0	0	0	0	1	31	yes
adlib_Sample_3893_AT_7	AGTGATCGTGTGAGCA-1	adlib	ad_libitum_fed	Singlet	neuron	magnaclass1	0	0	0	0	0	0	0	0	0	0	0	0		0	0	1	0	57	0	0	0	0	0	0	no
adlib_Sample_3893_AT_7	AGTGCCGAGCTGAGTG-1	adlib	ad_libitum_fed	Singlet	neuron	monoamine_class	0	0	0	0	1	56	0	0	0	0	0	0		0	0	0	0	0	0	0	0	0	0	0	no
adlib_Sample_3893_AT_7	AGTGCCGAGGAATCGC-1	adlib	ad_libitum_fed	Singlet	neuron	magnaclass1	0	0	0	0	0	0	0	0	0	0	1	0		1	24	1	75	60	1	11	0	0	0	0	yes
adlib_Sample_3893_AT_7	AGTGCCGAGGTGCCTC-1	adlib	ad_libitum_fed	Singlet	neuron	magnaclass1	0	0	0	0	0	0	0	0	0	0	1	0		1	50	1	0	61	1	84	1	50	0	0	yes
adlib_Sample_3893_AT_7	AGTGCCGCACACAGCC-1	adlib	ad_libitum_fed	Singlet	neuron	magnaclass1	0	0	0	0	0	0	0	0	0	0	1	0		1	46	1	0	58	1	24	0	0	1	44	yes
adlib_Sample_3893_AT_7	AGTGCCGCAGCGAACA-1	adlib	ad_libitum_fed	Singlet	neuron	Lhx2_class	0	0	0	0	0	0	0	0	0	0	1	0		1	25	0	0	0	0	0	0	0	0	0	no
adlib_Sample_3893_AT_7	AGTGCCGGTACAAGTA-1	adlib	ad_libitum_fed	Singlet	neuron	magnaclass1	0	0	0	0	0	0	0	0	0	0	0	0		0	0	0	0	0	0	0	0	0	0	0	no
adlib_Sample_3893_AT_7	AGTGCCGGTTCGTAAC-1	adlib	ad_libitum_fed	Singlet	neuron	magnaclass1	0	0	0	0	0	0	0	0	0	0	1	0		1	59	1	46	68	1	33	0	0	0	0	yes
adlib_Sample_3893_AT_7	AGTGCCGTCTGACGCG-1	adlib	ad_libitum_fed	Singlet	neuron	magnaclass2	0	0	0	0	0	0	0	0	0	0	0	0		0	0	0	0	0	0	0	0	0	0	0	no
adlib_Sample_3893_AT_7	AGTGTTGAGCTACTGT-1	adlib	ad_libitum_fed	Singlet	neuron	magnaclass2	0	0	0	0	0	0	0	0	0	0	0	0		0	0	0	0	0	0	0	1	51	1	78	yes
adlib_Sample_3893_AT_7	AGTGTTGAGTCCCTAA-1	adlib	ad_libitum_fed	Singlet	neuron	magnaclass1	0	0	0	0	0	0	0	0	0	0	0	0		0	0	0	0	0	1	63	0	0	0	0	no
adlib_Sample_3893_AT_7	AGTGTTGTCGCGATCG-1	adlib	ad_libitum_fed	Singlet	neuron	magnaclass1	0	0	0	0	0	0	0	0	0	0	0	0		0	0	0	0	0	1	76	0	0	0	0	no
adlib_Sample_3893_AT_7	AGTTAGCTCACTACGA-1	adlib	ad_libitum_fed	Singlet	neuron	Lrmda_class	0	0	0	0	0	0	0	0	0	0	0	0		0	0	1	14	0	1	7	0	0	0	0	yes
adlib_Sample_3893_AT_7	AGTTAGCTCAGGTGTT-1	adlib	ad_libitum_fed	Singlet	neuron	magnaclass2	0	0	0	0	0	0	0	0	0	0	1	0		1	52	0	0	0	0	0	0	0	0	0	no
adlib_Sample_3893_AT_7	AGTTAGCTCGCAATTG-1	adlib	ad_libitum_fed	Singlet	neuron	magnaclass2	0	0	0	0	0	0	0	0	0	0	0	0		0	0	0	0	0	0	0	0	0	0	0	no
adlib_Sample_3893_AT_7	AGTTCCCAGACGAGCT-1	adlib	ad_libitum_fed	Singlet	neuron	magnaclass1	0	0	0	0	0	0	0	0	0	0	0	0		0	0	1	0	62	0	0	1	95	1	78	yes
adlib_Sample_3893_AT_7	AGTTCCCAGTCTGTAC-1	adlib	ad_libitum_fed	Singlet	neuron	monoamine_class	0	0	0	0	0	0	0	0	0	0	0	0		0	0	0	0	0	0	0	0	0	0	0	no
adlib_Sample_3893_AT_7	AGTTCCCCAATAGAGT-1	adlib	ad_libitum_fed	Singlet	neuron	monoamine_class	0	0	1	62	1	86	0	0	0	0	0	0		0	0	0	0	0	0	0	0	0	0	0	no
adlib_Sample_3893_AT_7	AGTTCCCCAGTCGCAC-1	adlib	ad_libitum_fed	Singlet	neuron	Sall3_class	0	0	0	0	0	0	0	0	0	0	1	0		1	79	1	89	62	1	87	0	0	0	0	yes
adlib_Sample_3893_AT_7	AGTTCCCCATGGCCCA-1	adlib	ad_libitum_fed	Singlet	neuron	corelautus_class	0	0	0	0	0	0	0	0	0	0	0	0		0	0	0	0	0	0	0	0	0	0	0	no
adlib_Sample_3893_AT_7	AGTTCCCGTGGTACAG-1	adlib	ad_libitum_fed	Singlet	neuron	magnaclass1	0	0	0	0	0	0	0	0	0	0	1	0		1	58	1	46	93	0	0	0	0	0	0	yes
adlib_Sample_3893_AT_7	AGTTCCCTCAGGTGTT-1	adlib	ad_libitum_fed	Singlet	neuron	magnaclass1	0	0	0	0	0	0	0	0	0	0	0	0		0	0	1	0	86	1	20	0	0	0	0	yes
adlib_Sample_3893_AT_7	AGTTCGACAGCAAGAC-1	adlib	ad_libitum_fed	Singlet	neuron	monoamine_class	0	0	0	0	0	0	0	0	0	0	0	0		0	0	0	0	0	0	0	0	0	0	0	no
adlib_Sample_3893_AT_7	AGTTCGACAGTAACGG-1	adlib	ad_libitum_fed	Singlet	neuron	magnaclass1	0	0	0	0	0	0	0	0	0	0	1	0		1	26	1	87	13	0	0	0	0	0	0	yes
adlib_Sample_3893_AT_7	AGTTCGAGTATGGAGC-1	adlib	ad_libitum_fed	Singlet	neuron	Sall3_class	0	0	0	0	0	0	0	0	0	0	0	0		0	0	0	0	0	0	0	0	0	0	0	no
adlib_Sample_3893_AT_7	ATACCGAAGAACTTCC-1	adlib	ad_libitum_fed	Singlet	neuron	magnaclass1	0	0	0	0	0	0	0	0	0	0	1	0		1	48	0	0	0	0	0	0	0	0	0	no
adlib_Sample_3893_AT_7	ATACCGACAACAAAGT-1	adlib	ad_libitum_fed	Singlet	neuron	monoamine_class	0	0	0	0	0	0	0	0	0	0	0	0		0	0	0	0	0	0	0	0	0	0	0	no
adlib_Sample_3893_AT_7	ATACCGACACTTGAGT-1	adlib	ad_libitum_fed	Singlet	neuron	magnaclass1	0	0	0	0	0	0	0	0	0	0	1	0		1	8	1	68	54	1	4	1	63	0	0	yes
adlib_Sample_3893_AT_7	ATACCGAGTCGCGTTG-1	adlib	ad_libitum_fed	Singlet	neuron	magnaclass1	0	0	0	0	0	0	0	0	0	0	1	0		1	82	1	32	87	0	0	0	0	0	0	yes
adlib_Sample_3893_AT_7	ATACCTTGTCAACATC-1	adlib	ad_libitum_fed	Singlet	neuron	monoamine_class	0	0	0	0	0	0	0	0	0	0	1	0		1	21	0	0	0	0	0	0	0	0	0	no
adlib_Sample_3893_AT_7	ATACCTTTCAACCTTT-1	adlib	ad_libitum_fed	Singlet	neuron	magnaclass2	0	0	0	0	0	0	0	0	0	0	1	0		1	42	0	0	0	0	0	0	0	0	0	no
adlib_Sample_3893_AT_7	ATACTTCAGCATCCCG-1	adlib	ad_libitum_fed	Singlet	neuron	Sall3_class	0	0	0	0	0	0	0	0	0	0	0	0		0	0	1	37	60	1	46	0	0	0	0	yes
adlib_Sample_3893_AT_7	ATACTTCTCACTTGGA-1	adlib	ad_libitum_fed	Singlet	neuron	magnaclass2	0	0	0	0	0	0	0	0	0	0	0	0		0	0	1	61	0	0	0	0	0	0	0	no
adlib_Sample_3893_AT_7	ATAGACCAGGTGCTAG-1	adlib	ad_libitum_fed	Singlet	neuron	magnaclass1	0	0	0	0	0	0	0	0	0	0	0	0		0	0	1	0	28	1	95	0	0	0	0	yes
adlib_Sample_3893_AT_7	ATAGACCCATCAACCA-1	adlib	ad_libitum_fed	Singlet	neuron	magnaclass1	0	0	0	0	0	0	0	0	0	0	1	0		1	62	1	83	36	0	0	0	0	0	0	yes
adlib_Sample_3893_AT_7	ATAGAGAAGTACCCTA-1	adlib	ad_libitum_fed	Singlet	neuron	magnaclass2	0	0	0	0	0	0	0	0	0	0	1	0		1	33	0	0	0	0	0	0	0	0	0	no
adlib_Sample_3893_AT_7	ATAGAGAGTAGATTGA-1	adlib	ad_libitum_fed	Singlet	neuron	monoamine_class	1	87	1	71	0	0	0	0	0	0	0	0		0	0	0	0	0	0	0	0	0	1	80	yes
adlib_Sample_3893_AT_7	ATAGAGAGTTACGGAG-1	adlib	ad_libitum_fed	Singlet	neuron	magnaclass2	0	0	0	0	0	0	0	0	0	0	0	0		0	0	0	0	0	0	0	0	0	0	0	no
adlib_Sample_3893_AT_7	ATAGAGATCTATTGTC-1	adlib	ad_libitum_fed	Singlet	neuron	magnaclass1	0	0	0	0	0	0	0	0	0	0	0	0		0	0	1	27	18	1	73	0	0	0	0	yes
adlib_Sample_3893_AT_7	ATAGGCTAGGAACGTC-1	adlib	ad_libitum_fed	Singlet	neuron	magnaclass2	0	0	0	0	0	0	0	0	0	0	1	0		1	28	1	0	43	0	0	0	0	0	0	yes
adlib_Sample_3893_AT_7	ATAGGCTAGTGAGCCA-1	adlib	ad_libitum_fed	Singlet	neuron	magnaclass2	0	0	0	0	0	0	0	0	0	0	1	0		1	72	0	0	0	0	0	0	0	0	0	no
adlib_Sample_3893_AT_7	ATAGGCTCAAGCACAG-1	adlib	ad_libitum_fed	Singlet	neuron	monoamine_class	0	0	0	0	0	0	0	0	0	0	1	0		1	28	0	0	0	0	0	0	0	1	30	yes
adlib_Sample_3893_AT_7	ATAGGCTCATGAGGGT-1	adlib	ad_libitum_fed	Singlet	neuron	Lrmda_class	0	0	0	0	0	0	0	0	0	0	1	0		1	83	1	16	11	1	9	0	0	0	0	yes
adlib_Sample_3893_AT_7	ATAGGCTTCAGACAAA-1	adlib	ad_libitum_fed	Singlet	neuron	Sall3_class	0	0	0	0	0	0	0	0	0	0	1	0		1	84	0	0	0	1	61	0	0	1	44	yes
adlib_Sample_3893_AT_7	ATAGGCTTCGTGCATA-1	adlib	ad_libitum_fed	Singlet	neuron	magnaclass1	0	0	0	0	0	0	0	0	0	0	1	0		1	86	1	75	0	0	0	0	0	0	0	yes
adlib_Sample_3893_AT_7	ATATCCTAGTAGTGCG-1	adlib	ad_libitum_fed	Singlet	neuron	magnaclass1	0	0	0	0	0	0	0	0	0	0	0	0		0	0	0	0	0	0	0	0	0	0	0	no
adlib_Sample_3893_AT_7	ATATCCTCACGACAAG-1	adlib	ad_libitum_fed	Singlet	neuron	Sall3_class	0	0	0	0	0	0	0	0	0	0	1	0		1	14	1	0	8	1	66	0	0	0	0	yes
adlib_Sample_3893_AT_7	ATATCCTGTCATATGC-1	adlib	ad_libitum_fed	Singlet	neuron	magnaclass2	0	0	0	0	0	0	0	0	0	0	0	0		0	0	0	0	0	0	0	0	0	0	0	no
adlib_Sample_3893_AT_7	ATATCCTTCCGTTGAA-1	adlib	ad_libitum_fed	Singlet	neuron	magnaclass2	0	0	0	0	0	0	0	0	0	0	0	0		0	0	0	0	0	0	0	0	0	0	0	no
adlib_Sample_3893_AT_7	ATCACAGAGCCGAATG-1	adlib	ad_libitum_fed	Singlet	neuron	magnaclass1	0	0	1	36	0	0	0	0	0	0	1	0		1	95	1	0	57	1	81	1	77	0	0	yes
adlib_Sample_3893_AT_7	ATCACAGAGGCTTTCA-1	adlib	ad_libitum_fed	Singlet	neuron	magnaclass2	0	0	0	0	0	0	0	0	0	0	0	0		0	0	0	0	0	0	0	0	0	0	0	no
adlib_Sample_3893_AT_7	ATCACAGAGTTCACTG-1	adlib	ad_libitum_fed	Singlet	neuron	magnaclass1	0	0	0	0	0	0	0	0	0	0	1	0		1	47	0	0	0	0	0	1	97	0	0	yes
adlib_Sample_3893_AT_7	ATCACAGCAGACGATG-1	adlib	ad_libitum_fed	Singlet	neuron	magnaclass2	0	0	0	0	1	55	0	0	0	0	0	0		0	0	0	0	0	0	0	0	0	0	0	no
adlib_Sample_3893_AT_7	ATCACAGTCATGCGGC-1	adlib	ad_libitum_fed	Singlet	neuron	magnaclass2	0	0	0	0	0	0	0	0	0	0	0	0		0	0	0	0	0	0	0	0	0	0	0	no
adlib_Sample_3893_AT_7	ATCACGAAGCTAAACA-1	adlib	ad_libitum_fed	Singlet	neuron	magnaclass1	0	0	0	0	0	0	0	0	0	0	1	0		1	87	1	94	61	1	6	0	0	0	0	yes
adlib_Sample_3893_AT_7	ATCACGACACACCTAA-1	adlib	ad_libitum_fed	Singlet	neuron	Lrmda_class	0	0	1	1	0	0	0	0	0	0	1	0		1	12	0	0	0	0	0	0	0	0	0	yes
adlib_Sample_3893_AT_7	ATCACGACAGACCGCT-1	adlib	ad_libitum_fed	Singlet	neuron	monoamine_class	1	87	1	83	0	0	0	0	0	0	0	0		0	0	0	0	0	0	0	0	0	0	0	no
adlib_Sample_3893_AT_7	ATCACGACATTGAGCT-1	adlib	ad_libitum_fed	Singlet	neuron	magnaclass2	0	0	0	0	0	0	0	0	0	0	0	0		0	0	0	0	0	0	0	0	0	0	0	no
adlib_Sample_3893_AT_7	ATCACGAGTCGAAACG-1	adlib	ad_libitum_fed	Singlet	neuron	magnaclass1	0	0	0	0	0	0	0	0	0	0	0	0		0	0	1	0	48	1	85	0	0	0	0	yes
adlib_Sample_3893_AT_7	ATCACGATCTTCGGTC-1	adlib	ad_libitum_fed	Singlet	neuron	Sall3_class	0	0	0	0	0	0	0	0	0	0	1	0		1	38	1	29	0	1	54	0	0	0	0	yes
adlib_Sample_3893_AT_7	ATCACTTTCGTCAGAT-1	adlib	ad_libitum_fed	Singlet	neuron	Sall3_class	0	0	0	0	0	0	0	0	0	0	0	0		0	0	1	0	18	1	17	0	0	0	0	yes
adlib_Sample_3893_AT_7	ATCAGGTCAACCGACC-1	adlib	ad_libitum_fed	Singlet	neuron	magnaclass2	0	0	0	0	0	0	0	0	0	0	0	0		0	0	0	0	0	0	0	0	0	0	0	no
adlib_Sample_3893_AT_7	ATCAGGTCACTCACTC-1	adlib	ad_libitum_fed	Singlet	neuron	Golli_class	0	0	0	0	0	0	0	0	0	0	0	0		0	0	0	0	0	0	0	0	0	0	0	no
adlib_Sample_3893_AT_7	ATCAGGTCAGCGATTT-1	adlib	ad_libitum_fed	Singlet	neuron	Lhx2_class	0	0	0	0	0	0	0	0	0	0	0	0		0	0	0	0	0	0	0	0	0	0	0	no
adlib_Sample_3893_AT_7	ATCAGGTGTTGCCGCA-1	adlib	ad_libitum_fed	Singlet	neuron	magnaclass1	0	0	0	0	0	0	0	0	0	0	0	0		0	0	1	0	47	0	0	1	69	0	0	yes
adlib_Sample_3893_AT_7	ATCAGGTTCTCATGGA-1	adlib	ad_libitum_fed	Singlet	neuron	magnaclass1	0	0	0	0	1	61	0	0	0	0	0	0		0	0	1	93	54	0	0	0	0	0	0	yes
adlib_Sample_3893_AT_7	ATCATTCAGACTTCCA-1	adlib	ad_libitum_fed	Singlet	neuron	monoamine_class	0	0	0	0	0	0	1	66	0	0	0	0		0	0	0	0	0	0	0	0	0	0	0	no
adlib_Sample_3893_AT_7	ATCATTCGTCGTCGGT-1	adlib	ad_libitum_fed	Singlet	neuron	magnaclass1	0	0	0	0	0	0	0	0	0	0	1	0		1	16	1	0	77	1	87	0	0	0	0	yes
adlib_Sample_3893_AT_7	ATCATTCGTGAGATAT-1	adlib	ad_libitum_fed	Singlet	neuron	magnaclass1	0	0	0	0	0	0	0	0	0	0	1	0		1	32	1	25	68	0	0	0	0	0	0	yes
adlib_Sample_3893_AT_7	ATCATTCGTTCGCGTG-1	adlib	ad_libitum_fed	Singlet	neuron	Lrmda_class	0	0	0	0	0	0	0	0	0	0	0	0		0	0	0	0	0	0	0	0	0	1	21	no
adlib_Sample_3893_AT_7	ATCATTCTCTAACGCA-1	adlib	ad_libitum_fed	Singlet	neuron	monoamine_class	0	0	0	0	0	0	0	0	0	0	0	0		0	0	0	0	0	0	0	0	0	0	0	no
adlib_Sample_3893_AT_7	ATCATTCTCTCGTCGT-1	adlib	ad_libitum_fed	Singlet	neuron	magnaclass1	0	0	0	0	0	0	0	0	0	0	0	0		0	0	1	66	52	1	53	0	0	0	0	yes
adlib_Sample_3893_AT_7	ATCCACCAGCAAACAT-1	adlib	ad_libitum_fed	Singlet	neuron	monoamine_class	0	0	0	0	0	0	1	28	0	0	0	0		0	0	0	0	0	0	0	0	0	0	0	no
adlib_Sample_3893_AT_7	ATCCACCGTCGTATTG-1	adlib	ad_libitum_fed	Singlet	neuron	magnaclass1	0	0	1	79	0	0	0	0	0	0	0	0		0	0	1	97	44	0	0	0	0	0	0	yes
adlib_Sample_3893_AT_7	ATCCACCTCGGCTGAC-1	adlib	ad_libitum_fed	Singlet	neuron	magnaclass2	0	0	0	0	0	0	0	0	0	0	0	0		0	0	1	0	24	0	0	0	0	0	0	no
adlib_Sample_3893_AT_7	ATCCACCTCTTGGATG-1	adlib	ad_libitum_fed	Singlet	neuron	Lrmda_class	0	0	0	0	0	0	0	0	0	0	1	0		1	52	1	40	0	1	66	1	52	0	0	yes
adlib_Sample_3893_AT_7	ATCCATTAGCTGGCTC-1	adlib	ad_libitum_fed	Singlet	neuron	Lrmda_class	0	0	0	0	0	0	0	0	0	0	1	0		1	68	1	8	55	1	41	0	0	1	3	yes
adlib_Sample_3893_AT_7	ATCCATTCACATTGTG-1	adlib	ad_libitum_fed	Singlet	neuron	magnaclass1	0	0	0	0	0	0	0	0	0	0	1	0		1	67	1	19	39	1	40	0	0	0	0	yes
adlib_Sample_3893_AT_7	ATCCATTCAGCAGGAT-1	adlib	ad_libitum_fed	Singlet	neuron	magnaclass1	0	0	0	0	0	0	0	0	0	0	0	0		0	0	1	33	56	1	22	1	45	1	42	yes
adlib_Sample_3893_AT_7	ATCCCTGAGAACTTCC-1	adlib	ad_libitum_fed	Singlet	neuron	magnaclass2	0	0	0	0	0	0	0	0	0	0	0	0		0	0	0	0	0	0	0	0	0	0	0	no
adlib_Sample_3893_AT_7	ATCCCTGAGGAGGTTC-1	adlib	ad_libitum_fed	Singlet	neuron	Lhx2_class	0	0	0	0	0	0	0	0	0	0	0	0		0	0	0	0	0	0	0	0	0	1	84	no
adlib_Sample_3893_AT_7	ATCCCTGCAACACACT-1	adlib	ad_libitum_fed	Singlet	neuron	Sall3_class	0	0	0	0	0	0	0	0	0	0	1	0		1	84	0	0	0	1	10	0	0	0	0	yes
adlib_Sample_3893_AT_7	ATCCCTGCACCAGGTC-1	adlib	ad_libitum_fed	Singlet	neuron	magnaclass1	0	0	0	0	1	60	0	0	0	0	0	0		0	0	1	0	20	1	19	1	41	0	0	yes
adlib_Sample_3893_AT_7	ATCCCTGCAGTTTCGA-1	adlib	ad_libitum_fed	Singlet	neuron	Lrmda_class	0	0	0	0	0	0	0	0	0	0	1	0		1	69	0	0	0	1	42	0	0	0	0	yes
adlib_Sample_3893_AT_7	ATCCCTGCATCCGAGC-1	adlib	ad_libitum_fed	Singlet	neuron	magnaclass1	0	0	0	0	0	0	0	0	0	0	0	0		0	0	1	45	9	1	55	0	0	0	0	yes
adlib_Sample_3893_AT_7	ATCCCTGCATCTTTCA-1	adlib	ad_libitum_fed	Singlet	neuron	magnaclass2	0	0	0	0	0	0	0	0	0	0	0	0		0	0	0	0	0	0	0	0	0	0	0	no
adlib_Sample_3893_AT_7	ATCCCTGTCAAGTTGC-1	adlib	ad_libitum_fed	Singlet	neuron	magnaclass2	0	0	0	0	1	78	0	0	0	0	0	0		0	0	0	0	0	1	37	0	0	0	0	yes
adlib_Sample_3893_AT_7	ATCCCTGTCTCGTGAA-1	adlib	ad_libitum_fed	Singlet	neuron	Lrmda_class	0	0	0	0	0	0	0	0	0	0	1	0		1	88	1	0	14	1	13	0	0	0	0	yes
adlib_Sample_3893_AT_7	ATCCGTCAGCGCCTAC-1	adlib	ad_libitum_fed	Singlet	neuron	Lhx2_class	0	0	0	0	0	0	0	0	0	0	1	0		1	7	0	0	0	0	0	0	0	0	0	no
adlib_Sample_3893_AT_7	ATCCGTCCAGAATTCC-1	adlib	ad_libitum_fed	Singlet	neuron	magnaclass2	0	0	0	0	0	0	0	0	0	0	1	0		1	69	0	0	0	0	0	0	0	0	0	no
adlib_Sample_3893_AT_7	ATCCGTCGTATGAAAC-1	adlib	ad_libitum_fed	Singlet	neuron	magnaclass1	0	0	0	0	0	0	0	0	0	0	0	0		0	0	1	0	45	0	0	0	0	0	0	no
adlib_Sample_3893_AT_7	ATCCGTCGTTGGACCC-1	adlib	ad_libitum_fed	Singlet	neuron	monoamine_class	1	89	1	45	0	0	0	0	0	0	0	0		0	0	0	0	0	0	0	0	0	0	0	no
adlib_Sample_3893_AT_7	ATCCGTCTCGGCAGTC-1	adlib	ad_libitum_fed	Singlet	neuron	Lrmda_class	0	0	0	0	0	0	0	0	0	0	0	0		0	0	1	0	22	1	22	0	0	0	0	yes
adlib_Sample_3893_AT_7	ATCCTATAGCGTCAAG-1	adlib	ad_libitum_fed	Singlet	neuron	magnaclass1	0	0	0	0	0	0	0	0	0	0	0	0		0	0	1	0	98	0	0	0	0	0	0	no
adlib_Sample_3893_AT_7	ATCCTATCACTCTAGA-1	adlib	ad_libitum_fed	Singlet	neuron	magnaclass2	0	0	0	0	0	0	0	0	0	0	1	0		1	37	0	0	0	0	0	0	0	0	0	no
adlib_Sample_3893_AT_7	ATCCTATCAGACTCTA-1	adlib	ad_libitum_fed	Singlet	neuron	Lrmda_class	0	0	0	0	0	0	0	0	0	0	1	0		1	48	1	10	7	1	63	0	0	0	0	yes
adlib_Sample_3893_AT_7	ATCCTATCATACATCG-1	adlib	ad_libitum_fed	Singlet	neuron	Sall3_class	0	0	0	0	0	0	0	0	0	0	1	0		1	79	1	0	9	1	81	0	0	1	21	yes
adlib_Sample_3893_AT_7	ATCCTATGTAACGCGA-1	adlib	ad_libitum_fed	Singlet	neuron	corelautus_class	0	0	0	0	0	0	0	0	0	0	0	0		0	0	0	0	0	0	0	0	0	0	0	no
adlib_Sample_3893_AT_7	ATCCTATGTACCGGCT-1	adlib	ad_libitum_fed	Singlet	neuron	corelautus_class	0	0	0	0	0	0	0	0	0	0	0	0		0	0	0	0	0	0	0	0	0	0	0	no
adlib_Sample_3893_AT_7	ATCCTATGTGTAAACA-1	adlib	ad_libitum_fed	Singlet	neuron	magnaclass1	0	0	0	0	0	0	0	0	0	0	1	0		1	37	1	0	42	1	53	0	0	0	0	yes
adlib_Sample_3893_AT_7	ATCCTATTCCGACATA-1	adlib	ad_libitum_fed	Singlet	neuron	magnaclass2	0	0	0	0	1	56	0	0	0	0	1	0		1	34	0	0	0	0	0	0	0	0	0	yes
adlib_Sample_3893_AT_7	ATCCTATTCCTAACAG-1	adlib	ad_libitum_fed	Singlet	neuron	magnaclass1	0	0	0	0	0	0	0	0	0	0	0	0		0	0	1	0	38	1	38	0	0	0	0	yes
adlib_Sample_3893_AT_7	ATCCTATTCTCTAAGG-1	adlib	ad_libitum_fed	Singlet	neuron	magnaclass1	1	62	0	0	0	0	0	0	0	0	1	0		1	65	0	0	0	1	92	1	62	1	84	yes
adlib_Sample_3893_AT_7	ATCGATGAGACGCATG-1	adlib	ad_libitum_fed	Singlet	neuron	magnaclass2	0	0	0	0	0	0	0	0	0	0	0	0		0	0	0	0	0	0	0	0	0	1	56	no
adlib_Sample_3893_AT_7	ATCGATGAGCGCCTTG-1	adlib	ad_libitum_fed	Singlet	neuron	magnaclass1	0	0	0	0	0	0	0	0	0	0	1	0		1	39	1	30	21	0	0	0	0	0	0	yes
adlib_Sample_3893_AT_7	ATCGATGAGCGTACAG-1	adlib	ad_libitum_fed	Singlet	neuron	monoamine_class	0	0	0	0	0	0	0	0	0	0	1	0		1	62	0	0	0	0	0	0	0	1	98	yes
adlib_Sample_3893_AT_7	ATCGATGCATATGGCT-1	adlib	ad_libitum_fed	Singlet	neuron	magnaclass1	0	0	0	0	1	48	0	0	0	0	1	0		1	26	1	56	0	0	0	0	0	0	0	yes
adlib_Sample_3893_AT_7	ATCGATGGTACAACGG-1	adlib	ad_libitum_fed	Singlet	neuron	magnaclass2	0	0	0	0	0	0	0	0	0	0	1	0		1	50	1	0	13	0	0	0	0	0	0	yes
adlib_Sample_3893_AT_7	ATCGATGGTGGAAATT-1	adlib	ad_libitum_fed	Singlet	neuron	magnaclass1	0	0	0	0	0	0	0	0	0	0	1	0		1	62	0	0	0	1	9	0	0	1	24	yes
adlib_Sample_3893_AT_7	ATCGCCTAGAATTGTG-1	adlib	ad_libitum_fed	Singlet	neuron	magnaclass2	0	0	0	0	0	0	0	0	0	0	1	0		1	54	0	0	0	0	0	0	0	0	0	no
adlib_Sample_3893_AT_7	ATCGCCTGTAGATCGG-1	adlib	ad_libitum_fed	Singlet	neuron	magnaclass2	0	0	0	0	0	0	0	0	0	0	0	0		0	0	0	0	0	0	0	0	0	0	0	no
adlib_Sample_3893_AT_7	ATCGCCTGTCAATGGG-1	adlib	ad_libitum_fed	Singlet	neuron	magnaclass1	0	0	0	0	0	0	0	0	0	0	1	0		1	95	1	0	41	1	42	0	0	0	0	yes
adlib_Sample_3893_AT_7	ATCGCCTGTTGTAGCT-1	adlib	ad_libitum_fed	Singlet	neuron	Sall3_class	0	0	0	0	0	0	0	0	0	0	1	0		1	33	1	0	48	0	0	0	0	0	0	yes
adlib_Sample_3893_AT_7	ATCGCCTTCAGGGATG-1	adlib	ad_libitum_fed	Singlet	neuron	monoamine_class	0	0	0	0	0	0	0	0	0	0	1	0		1	91	0	0	0	0	0	0	0	0	0	no
adlib_Sample_3893_AT_7	ATCGGATAGCTCGGCT-1	adlib	ad_libitum_fed	Singlet	neuron	Lrmda_class	0	0	0	0	1	70	0	0	0	0	0	0		0	0	0	0	0	0	0	0	0	0	0	no
adlib_Sample_3893_AT_7	ATCGGATCAGCAGATG-1	adlib	ad_libitum_fed	Singlet	neuron	monoamine_class	0	0	0	0	0	0	0	0	0	0	1	1		0	0	0	0	0	0	0	0	0	0	0	no
adlib_Sample_3893_AT_7	ATCGGATGTGCCTGCA-1	adlib	ad_libitum_fed	Singlet	neuron	Lhx2_class	0	0	0	0	0	0	0	0	0	0	1	0		1	56	0	0	0	0	0	0	0	0	0	no
adlib_Sample_3893_AT_7	ATCGGATGTTGGATCT-1	adlib	ad_libitum_fed	Singlet	neuron	magnaclass1	0	0	0	0	0	0	0	0	0	0	0	0		0	0	0	0	0	1	88	0	0	0	0	no
adlib_Sample_3893_AT_7	ATCGGATTCAACTGGT-1	adlib	ad_libitum_fed	Singlet	neuron	magnaclass2	0	0	0	0	0	0	0	0	0	0	0	0		0	0	0	0	0	0	0	0	0	0	0	no
adlib_Sample_3893_AT_7	ATCGGATTCACTAGCA-1	adlib	ad_libitum_fed	Singlet	neuron	pH_class	0	0	0	0	0	0	0	0	0	0	0	0		0	0	0	0	0	0	0	0	0	0	0	no
adlib_Sample_3893_AT_7	ATCGGATTCGCTCTAC-1	adlib	ad_libitum_fed	Singlet	neuron	magnaclass2	0	0	0	0	0	0	0	0	0	0	0	0		0	0	0	0	0	0	0	0	0	0	0	no
adlib_Sample_3893_AT_7	ATCGGCGCAGCTAACT-1	adlib	ad_libitum_fed	Singlet	neuron	magnaclass1	0	0	0	0	0	0	0	0	0	0	0	0		0	0	0	0	0	1	87	0	0	0	0	no
adlib_Sample_3893_AT_7	ATCGGCGGTATGAGGC-1	adlib	ad_libitum_fed	Singlet	neuron	magnaclass1	0	0	0	0	0	0	0	0	0	0	0	0		0	0	1	0	69	0	0	0	0	0	0	no
adlib_Sample_3893_AT_7	ATCGGCGTCGTTCGCT-1	adlib	ad_libitum_fed	Singlet	neuron	magnaclass1	0	0	0	0	0	0	0	0	0	0	0	0		0	0	1	0	83	1	86	0	0	0	0	yes
adlib_Sample_3893_AT_7	ATCGGCGTCTGCCTGT-1	adlib	ad_libitum_fed	Singlet	neuron	Lhx2_class	0	0	0	0	0	0	0	0	0	0	0	0		0	0	0	0	0	0	0	0	0	0	0	no
adlib_Sample_3893_AT_7	ATCGTAGAGGGAACAA-1	adlib	ad_libitum_fed	Singlet	neuron	corelautus_class	0	0	0	0	0	0	0	0	0	0	1	0		1	79	0	0	0	0	0	0	0	0	0	no
adlib_Sample_3893_AT_7	ATCGTAGAGGGTGAGG-1	adlib	ad_libitum_fed	Singlet	neuron	Sall3_class	0	0	0	0	0	0	0	0	0	0	1	0		1	78	0	0	0	0	0	0	0	0	0	no
adlib_Sample_3893_AT_7	ATCGTAGTCATCACTT-1	adlib	ad_libitum_fed	Singlet	neuron	corelautus_class	0	0	0	0	0	0	0	0	0	0	0	0		0	0	0	0	0	1	99	0	0	0	0	no
adlib_Sample_3893_AT_7	ATCGTAGTCATGACAC-1	adlib	ad_libitum_fed	Singlet	neuron	magnaclass1	0	0	0	0	0	0	0	0	0	0	0	0		0	0	1	35	0	0	0	1	77	0	0	yes
adlib_Sample_3893_AT_7	ATCGTCCAGAGGCCAT-1	adlib	ad_libitum_fed	Singlet	neuron	corelautus_class	0	0	0	0	0	0	0	0	0	0	0	0		0	0	0	0	0	0	0	0	0	0	0	no
adlib_Sample_3893_AT_7	ATCGTCCTCTAATTCC-1	adlib	ad_libitum_fed	Singlet	neuron	magnaclass1	0	0	0	0	1	18	0	0	0	0	0	0		0	0	1	42	55	0	0	0	0	0	0	yes
adlib_Sample_3893_AT_7	ATCTCTAAGTCATTGC-1	adlib	ad_libitum_fed	Singlet	neuron	magnaclass1	0	0	0	0	0	0	0	0	0	0	0	0		0	0	1	0	23	0	0	0	0	0	0	no
adlib_Sample_3893_AT_7	ATCTCTACACGACGAA-1	adlib	ad_libitum_fed	Singlet	neuron	magnaclass2	0	0	0	0	0	0	0	0	0	0	1	0		1	95	0	0	0	0	0	0	0	1	31	yes
adlib_Sample_3893_AT_7	ATCTCTACACTACACA-1	adlib	ad_libitum_fed	Singlet	neuron	magnaclass2	0	0	0	0	1	16	0	0	0	0	1	0		1	4	1	0	14	0	0	0	0	0	0	yes
adlib_Sample_3893_AT_7	ATCTCTACAGCTTTCC-1	adlib	ad_libitum_fed	Singlet	neuron	monoamine_class	0	0	0	0	0	0	0	0	0	0	0	0		0	0	0	0	0	0	0	0	0	0	0	no
adlib_Sample_3893_AT_7	ATCTCTAGTTAGTTCG-1	adlib	ad_libitum_fed	Singlet	neuron	magnaclass1	0	0	0	0	0	0	0	0	0	0	0	0		0	0	1	64	49	0	0	0	0	1	69	yes
adlib_Sample_3893_AT_7	ATCTCTATCGATGCAT-1	adlib	ad_libitum_fed	Singlet	neuron	magnaclass1	0	0	0	0	0	0	0	0	0	0	0	0		0	0	1	0	98	0	0	0	0	0	0	no
adlib_Sample_3893_AT_7	ATCTCTATCGTCTCAC-1	adlib	ad_libitum_fed	Singlet	neuron	Lhx2_class	0	0	0	0	0	0	0	0	0	0	1	0		1	15	0	0	0	0	0	0	0	0	0	no
adlib_Sample_3893_AT_7	ATCTCTATCTAGACAC-1	adlib	ad_libitum_fed	Singlet	neuron	magnaclass2	0	0	0	0	0	0	0	0	0	0	0	0		0	0	0	0	0	0	0	0	0	0	0	no
adlib_Sample_3893_AT_7	ATCTTCACACAACGCC-1	adlib	ad_libitum_fed	Singlet	neuron	magnaclass1	0	0	0	0	0	0	0	0	0	0	0	0		0	0	1	75	95	1	26	0	0	1	46	yes
adlib_Sample_3893_AT_7	ATGAAAGAGCTAGATA-1	adlib	ad_libitum_fed	Singlet	neuron	magnaclass2	0	0	0	0	1	84	0	0	0	0	1	0		1	75	0	0	0	0	0	0	0	1	88	yes
adlib_Sample_3893_AT_7	ATGAAAGCAGCAGAAC-1	adlib	ad_libitum_fed	Singlet	neuron	magnaclass2	0	0	0	0	0	0	0	0	0	0	0	0		0	0	0	0	0	0	0	0	0	0	0	no
adlib_Sample_3893_AT_7	ATGAAAGGTGGGTATG-1	adlib	ad_libitum_fed	Singlet	neuron	magnaclass2	0	0	0	0	0	0	0	0	0	0	0	0		0	0	0	0	0	0	0	0	0	0	0	no
adlib_Sample_3893_AT_7	ATGACCACAATAGTCC-1	adlib	ad_libitum_fed	Singlet	neuron	magnaclass1	0	0	0	0	0	0	0	0	0	0	1	0		1	13	1	0	73	0	0	0	0	1	17	yes
adlib_Sample_3893_AT_7	ATGACCACACAAAGCG-1	adlib	ad_libitum_fed	Singlet	neuron	monoamine_class	0	0	1	22	0	0	1	19	0	0	0	0		0	0	0	0	0	0	0	0	0	0	0	no
adlib_Sample_3893_AT_7	ATGACCACACTGCATA-1	adlib	ad_libitum_fed	Singlet	neuron	Lrmda_class	0	0	0	0	0	0	0	0	0	0	0	0		0	0	0	0	0	0	0	0	0	0	0	no
adlib_Sample_3893_AT_7	ATGAGGGCACCCATAA-1	adlib	ad_libitum_fed	Singlet	neuron	magnaclass2	0	0	0	0	0	0	0	0	0	0	0	0		0	0	0	0	0	0	0	0	0	1	24	no
adlib_Sample_3893_AT_7	ATGAGGGCAGATCCAT-1	adlib	ad_libitum_fed	Singlet	neuron	magnaclass1	0	0	0	0	0	0	0	0	0	0	0	0		0	0	0	0	0	1	85	0	0	1	88	yes
adlib_Sample_3893_AT_7	ATGAGTCAGGATGAGA-1	adlib	ad_libitum_fed	Singlet	neuron	Lrmda_class	0	0	0	0	0	0	0	0	0	0	0	0		0	0	1	63	69	0	0	0	0	0	0	no
adlib_Sample_3893_AT_7	ATGAGTCAGGCACAAC-1	adlib	ad_libitum_fed	Singlet	neuron	magnaclass1	0	0	0	0	0	0	0	0	0	0	0	0		0	0	1	91	0	0	0	0	0	0	0	no
adlib_Sample_3893_AT_7	ATGAGTCTCGCTACAA-1	adlib	ad_libitum_fed	Singlet	neuron	magnaclass1	0	0	0	0	0	0	0	0	0	0	1	0		1	69	1	0	96	0	0	0	0	0	0	yes
adlib_Sample_3893_AT_7	ATGAGTCTCGGAACTT-1	adlib	ad_libitum_fed	Singlet	neuron	Lrmda_class	0	0	0	0	0	0	0	0	0	0	0	0		0	0	1	94	93	1	79	0	0	0	0	yes
adlib_Sample_3893_AT_7	ATGATCGAGGGTCAAC-1	adlib	ad_libitum_fed	Singlet	neuron	Lhx2_class	0	0	0	0	0	0	0	0	0	0	0	0		0	0	0	0	0	0	0	1	51	0	0	no
adlib_Sample_3893_AT_7	ATGATCGTCTCCGTGT-1	adlib	ad_libitum_fed	Singlet	neuron	magnaclass2	0	0	0	0	0	0	0	0	0	0	0	0		0	0	1	0	15	0	0	0	0	1	31	yes
adlib_Sample_3893_AT_7	ATGCATGTCGCAGTGC-1	adlib	ad_libitum_fed	Singlet	neuron	magnaclass1	0	0	0	0	0	0	0	0	0	0	1	0		1	78	1	65	18	1	86	1	39	0	0	yes
adlib_Sample_3893_AT_7	ATGCCTCAGATGTAGT-1	adlib	ad_libitum_fed	Singlet	neuron	magnaclass2	0	0	0	0	0	0	0	0	0	0	0	0		0	0	0	0	0	0	0	1	75	1	72	yes
adlib_Sample_3893_AT_7	ATGCCTCCATGTTACG-1	adlib	ad_libitum_fed	Singlet	neuron	Lrmda_class	0	0	0	0	0	0	0	0	0	0	0	0		0	0	1	82	68	0	0	0	0	0	0	no
adlib_Sample_3893_AT_7	ATGCCTCGTGCTATTG-1	adlib	ad_libitum_fed	Singlet	neuron	Sall3_class	0	0	0	0	0	0	0	0	0	0	1	0		1	36	1	0	19	1	87	0	0	0	0	yes
adlib_Sample_3893_AT_7	ATGCCTCTCCTCTCTT-1	adlib	ad_libitum_fed	Singlet	neuron	monoamine_class	0	0	0	0	1	61	0	0	0	0	1	0		1	41	0	0	0	0	0	0	0	0	0	yes
adlib_Sample_3893_AT_7	ATGCCTCTCGTTAGAC-1	adlib	ad_libitum_fed	Singlet	neuron	magnaclass2	0	0	0	0	0	0	0	0	0	0	1	0		1	42	0	0	0	0	0	0	0	0	0	no
adlib_Sample_3893_AT_7	ATGCGATAGTAAGAGG-1	adlib	ad_libitum_fed	Singlet	neuron	Lrmda_class	0	0	0	0	0	0	0	0	0	0	0	0		0	0	0	0	0	0	0	0	0	0	0	no
adlib_Sample_3893_AT_7	ATGCGATCAAGTCCAT-1	adlib	ad_libitum_fed	Singlet	neuron	magnaclass2	0	0	0	0	0	0	0	0	0	0	0	0		0	0	0	0	0	0	0	0	0	1	46	no
adlib_Sample_3893_AT_7	ATGCGATCACGAGAAC-1	adlib	ad_libitum_fed	Singlet	neuron	monoamine_class	0	0	0	0	0	0	0	0	0	0	0	0		0	0	0	0	0	0	0	0	0	0	0	no
adlib_Sample_3893_AT_7	ATGGAGGAGCCTGTCG-1	adlib	ad_libitum_fed	Singlet	neuron	Lrmda_class	0	0	0	0	1	89	0	0	0	0	0	0		0	0	0	0	0	1	59	0	0	0	0	yes
adlib_Sample_3893_AT_7	ATGGAGGGTGTTTACG-1	adlib	ad_libitum_fed	Singlet	neuron	magnaclass2	0	0	0	0	0	0	0	0	0	0	0	0		0	0	0	0	0	0	0	0	0	0	0	no
adlib_Sample_3893_AT_7	ATGGATCCATACCGTA-1	adlib	ad_libitum_fed	Singlet	neuron	Lrmda_class	0	0	0	0	0	0	0	0	0	0	1	0		1	19	1	0	10	0	0	0	0	0	0	yes
adlib_Sample_3893_AT_7	ATGGATCTCGTTCTGC-1	adlib	ad_libitum_fed	Singlet	neuron	magnaclass1	0	0	0	0	0	0	0	0	0	0	0	0		0	0	1	80	66	1	69	0	0	0	0	yes
adlib_Sample_3893_AT_7	ATGGATCTCTGATTCT-1	adlib	ad_libitum_fed	Singlet	neuron	magnaclass1	0	0	0	0	0	0	0	0	0	0	0	0		0	0	0	0	0	0	0	0	0	1	57	no
adlib_Sample_3893_AT_7	ATGGATCTCTGTCTCG-1	adlib	ad_libitum_fed	Singlet	neuron	magnaclass2	0	0	0	0	0	0	0	0	0	0	0	0		0	0	0	0	0	0	0	0	0	0	0	no
adlib_Sample_3893_AT_7	ATGGGAGCATCCAATG-1	adlib	ad_libitum_fed	Singlet	neuron	monoamine_class	0	0	1	96	0	0	0	0	0	0	0	0		0	0	0	0	0	0	0	0	0	0	0	no
adlib_Sample_3893_AT_7	ATGGGTTTCGCCACTT-1	adlib	ad_libitum_fed	Singlet	neuron	Lhx2_class	0	0	0	0	0	0	0	0	0	0	0	0		0	0	0	0	0	0	0	0	0	1	42	no
adlib_Sample_3893_AT_7	ATGGTTGAGCGCCTAC-1	adlib	ad_libitum_fed	Singlet	neuron	magnaclass2	0	0	0	0	0	0	0	0	0	0	1	0		1	44	0	0	0	0	0	0	0	1	42	yes
adlib_Sample_3893_AT_7	ATGGTTGCATAACAGA-1	adlib	ad_libitum_fed	Singlet	neuron	magnaclass1	0	0	0	0	1	53	0	0	0	0	0	0		0	0	1	24	46	1	47	0	0	0	0	yes
adlib_Sample_3893_AT_7	ATGGTTGTCCTATTGT-1	adlib	ad_libitum_fed	Singlet	neuron	magnaclass2	0	0	0	0	0	0	0	0	0	0	1	0		1	64	1	0	5	0	0	0	0	1	12	yes
adlib_Sample_3893_AT_7	ATGGTTGTCGAGAGCA-1	adlib	ad_libitum_fed	Singlet	neuron	magnaclass1	0	0	0	0	0	0	0	0	0	0	1	0		1	95	0	0	0	1	42	0	0	0	0	yes
adlib_Sample_3893_AT_7	ATGTCCCAGGCAGGTT-1	adlib	ad_libitum_fed	Singlet	neuron	magnaclass1	0	0	0	0	0	0	0	0	0	0	1	1		1	97	1	42	0	0	0	0	0	0	0	yes
adlib_Sample_3893_AT_7	ATGTCCCCAAATACAG-1	adlib	ad_libitum_fed	Singlet	neuron	magnaclass2	0	0	0	0	1	10	0	0	0	0	0	0		0	0	0	0	0	0	0	0	0	0	0	no
adlib_Sample_3893_AT_7	ATGTCCCGTACCTAAC-1	adlib	ad_libitum_fed	Singlet	neuron	Sall3_class	0	0	0	0	1	24	0	0	0	0	1	0		1	38	1	0	5	1	71	0	0	1	88	yes
adlib_Sample_3893_AT_7	ATGTCCCGTAGTAAGT-1	adlib	ad_libitum_fed	Singlet	neuron	Sall3_class	0	0	0	0	0	0	0	0	0	0	1	0		1	66	1	65	25	1	39	0	0	0	0	yes
adlib_Sample_3893_AT_7	ATGTCTTAGACCATAA-1	adlib	ad_libitum_fed	Singlet	neuron	monoamine_class	0	0	0	0	0	0	0	0	0	0	0	0		0	0	0	0	0	0	0	0	0	0	0	no
adlib_Sample_3893_AT_7	ATGTCTTCATGGAGAC-1	adlib	ad_libitum_fed	Singlet	neuron	magnaclass1	0	0	0	0	0	0	0	0	0	0	1	0		1	55	1	42	0	1	30	1	54	0	0	yes
adlib_Sample_3893_AT_7	ATGTCTTGTCAACATC-1	adlib	ad_libitum_fed	Singlet	neuron	magnaclass2	0	0	0	0	0	0	0	0	0	0	0	0		0	0	0	0	0	0	0	0	0	0	0	no
adlib_Sample_3893_AT_7	ATGTCTTGTGCCTACG-1	adlib	ad_libitum_fed	Singlet	neuron	Sall3_class	0	0	0	0	0	0	0	0	0	0	0	0		0	0	1	80	66	0	0	0	0	0	0	no
adlib_Sample_3893_AT_7	ATGTCTTGTTGCTGAT-1	adlib	ad_libitum_fed	Singlet	neuron	monoamine_class	0	0	0	0	0	0	0	0	0	0	1	0		1	58	1	45	0	0	0	0	0	0	0	yes
adlib_Sample_3893_AT_7	ATGTCTTTCAGCTCTC-1	adlib	ad_libitum_fed	Singlet	neuron	magnaclass1	0	0	0	0	0	0	0	0	0	0	1	0		1	4	1	57	3	1	13	1	81	0	0	yes
adlib_Sample_3893_AT_7	ATTACCTGTATCGAGG-1	adlib	ad_libitum_fed	Singlet	neuron	Lhx2_class	0	0	0	0	1	83	0	0	0	0	1	0		1	74	0	0	0	0	0	0	0	0	0	yes
adlib_Sample_3893_AT_7	ATTACCTGTCAGGCAA-1	adlib	ad_libitum_fed	Singlet	neuron	magnaclass2	0	0	0	0	0	0	0	0	0	0	0	0		0	0	0	0	0	0	0	0	0	0	0	no
adlib_Sample_3893_AT_7	ATTACCTGTCGAGATG-1	adlib	ad_libitum_fed	Singlet	neuron	magnaclass1	0	0	0	0	0	0	0	0	0	0	0	0		0	0	1	48	35	1	73	0	0	0	0	yes
adlib_Sample_3893_AT_7	ATTACCTTCTGCCTCA-1	adlib	ad_libitum_fed	Singlet	neuron	magnaclass1	0	0	0	0	1	46	0	0	0	0	0	0		0	0	1	0	75	1	11	0	0	0	0	yes
adlib_Sample_3893_AT_7	ATTACTCCAGGATCTT-1	adlib	ad_libitum_fed	Singlet	neuron	Lrmda_class	0	0	0	0	0	0	0	0	0	0	1	0		1	48	1	37	60	1	25	0	0	0	0	yes
adlib_Sample_3893_AT_7	ATTACTCCAGTCACGC-1	adlib	ad_libitum_fed	Singlet	neuron	magnaclass1	0	0	0	0	0	0	0	0	0	0	0	0		0	0	1	0	40	0	0	0	0	0	0	no
adlib_Sample_3893_AT_7	ATTACTCGTATGAAAC-1	adlib	ad_libitum_fed	Singlet	neuron	magnaclass1	0	0	0	0	0	0	0	0	0	0	0	0		0	0	1	0	62	0	0	0	0	0	0	no
adlib_Sample_3893_AT_7	ATTATCCAGTCGAGGT-1	adlib	ad_libitum_fed	Singlet	neuron	magnaclass1	0	0	0	0	0	0	0	0	0	0	1	0		1	55	1	60	31	1	45	1	9	0	0	yes
adlib_Sample_3893_AT_7	ATTATCCGTAGCTTGT-1	adlib	ad_libitum_fed	Singlet	neuron	Lhx2_class	0	0	0	0	0	0	0	0	0	0	0	0		0	0	0	0	0	0	0	0	0	0	0	no
adlib_Sample_3893_AT_7	ATTATCCGTCACGACC-1	adlib	ad_libitum_fed	Singlet	neuron	magnaclass2	0	0	0	0	0	0	0	0	0	0	1	0		1	27	0	0	0	0	0	0	0	1	29	yes
adlib_Sample_3893_AT_7	ATTATCCGTGGCATCC-1	adlib	ad_libitum_fed	Singlet	neuron	magnaclass1	0	0	0	0	0	0	0	0	0	0	0	0		0	0	1	9	23	1	71	0	0	0	0	yes
adlib_Sample_3893_AT_7	ATTATCCTCCAAGCTA-1	adlib	ad_libitum_fed	Singlet	neuron	Lhx2_class	0	0	0	0	1	23	0	0	0	0	0	0		0	0	0	0	0	0	0	0	0	0	0	no
adlib_Sample_3893_AT_7	ATTATCCTCTCCGAAA-1	adlib	ad_libitum_fed	Singlet	neuron	magnaclass1	0	0	0	0	0	0	0	0	0	0	1	0		1	82	1	0	22	1	21	0	0	0	0	yes
adlib_Sample_3893_AT_7	ATTCACTAGGAGAGTA-1	adlib	ad_libitum_fed	Singlet	neuron	Sall3_class	0	0	0	0	0	0	0	0	0	0	0	0		0	0	1	0	63	1	29	0	0	0	0	yes
adlib_Sample_3893_AT_7	ATTCACTAGGCATGCA-1	adlib	ad_libitum_fed	Singlet	neuron	Lrmda_class	0	0	0	0	1	27	0	0	0	0	1	0		1	43	1	8	55	1	58	0	0	0	0	yes
adlib_Sample_3893_AT_7	ATTCACTCAACATCGT-1	adlib	ad_libitum_fed	Singlet	neuron	Lrmda_class	0	0	0	0	0	0	0	0	0	0	1	0		1	32	0	0	0	0	0	0	0	0	0	no
adlib_Sample_3893_AT_7	ATTCACTTCAAGAGGC-1	adlib	ad_libitum_fed	Singlet	neuron	Lrmda_class	0	0	0	0	0	0	0	0	0	0	1	0		1	6	0	0	0	0	0	0	0	0	0	no
adlib_Sample_3893_AT_7	ATTCAGGCATAGCTGT-1	adlib	ad_libitum_fed	Singlet	neuron	magnaclass1	0	0	0	0	0	0	0	0	0	0	0	0		0	0	0	0	0	0	0	0	0	0	0	no
adlib_Sample_3893_AT_7	ATTCAGGGTATCACCA-1	adlib	ad_libitum_fed	Singlet	neuron	magnaclass2	0	0	0	0	0	0	0	0	0	0	0	0		0	0	0	0	0	0	0	0	0	1	58	no
adlib_Sample_3893_AT_7	ATTCAGGTCAAACGAA-1	adlib	ad_libitum_fed	Singlet	neuron	magnaclass2	0	0	0	0	0	0	0	0	0	0	1	0		1	68	0	0	0	1	4	1	15	0	0	yes
adlib_Sample_3893_AT_7	ATTCAGGTCGACGTCG-1	adlib	ad_libitum_fed	Singlet	neuron	magnaclass2	0	0	0	0	0	0	0	0	0	0	1	0		1	49	1	0	60	0	0	0	0	0	0	yes
adlib_Sample_3893_AT_7	ATTCAGGTCTTAGCTT-1	adlib	ad_libitum_fed	Singlet	neuron	Lrmda_class	0	0	0	0	0	0	0	0	0	0	0	0		0	0	0	0	0	0	0	0	0	0	0	no
adlib_Sample_3893_AT_7	ATTCATCAGATAGTCA-1	adlib	ad_libitum_fed	Singlet	neuron	magnaclass1	0	0	0	0	0	0	0	0	0	0	1	0		1	27	1	57	14	0	0	0	0	0	0	yes
adlib_Sample_3893_AT_7	ATTCATCCAAAGGTTA-1	adlib	ad_libitum_fed	Singlet	neuron	magnaclass1	0	0	0	0	0	0	0	0	0	0	1	0		1	78	1	0	83	1	99	0	0	0	0	yes
adlib_Sample_3893_AT_7	ATTCATCCATCCTAAG-1	adlib	ad_libitum_fed	Singlet	neuron	magnaclass1	0	0	0	0	0	0	0	0	0	0	1	1		0	0	1	66	97	0	0	0	0	0	0	yes
adlib_Sample_3893_AT_7	ATTCCATAGCACCTGC-1	adlib	ad_libitum_fed	Singlet	neuron	magnaclass1	0	0	0	0	0	0	0	0	0	0	1	0		1	24	1	19	12	1	78	0	0	0	0	yes
adlib_Sample_3893_AT_7	ATTCCATAGGTGATAT-1	adlib	ad_libitum_fed	Singlet	neuron	magnaclass1	0	0	0	0	0	0	0	0	0	0	0	0		0	0	1	82	69	0	0	0	0	0	0	no
adlib_Sample_3893_AT_7	ATTCCATCATACCATG-1	adlib	ad_libitum_fed	Singlet	neuron	monoamine_class	0	0	0	0	0	0	0	0	0	0	1	0		1	8	0	0	0	0	0	0	0	0	0	no
adlib_Sample_3893_AT_7	ATTCCATCATCGAACT-1	adlib	ad_libitum_fed	Singlet	neuron	monoamine_class	0	0	1	48	0	0	0	0	0	0	1	1		0	0	0	0	0	0	0	1	60	0	0	yes
adlib_Sample_3893_AT_7	ATTCCATGTCGTCTCT-1	adlib	ad_libitum_fed	Singlet	neuron	magnaclass2	0	0	1	21	0	0	0	0	0	0	1	0		1	22	1	17	0	0	0	0	0	0	0	yes
adlib_Sample_3893_AT_7	ATTCCATGTTGTCTAG-1	adlib	ad_libitum_fed	Singlet	neuron	Lrmda_class	0	0	0	0	0	0	0	0	0	0	0	0		0	0	0	0	0	1	3	0	0	0	0	no
adlib_Sample_3893_AT_7	ATTCCCGCACAACGTT-1	adlib	ad_libitum_fed	Singlet	neuron	magnaclass1	0	0	0	0	1	25	0	0	0	0	1	0		1	8	1	52	21	1	67	0	0	0	0	yes
adlib_Sample_3893_AT_7	ATTCCCGCACCGTGCA-1	adlib	ad_libitum_fed	Singlet	neuron	monoamine_class	0	0	1	18	0	0	0	0	0	0	1	0		1	60	1	0	69	0	0	0	0	0	0	yes
adlib_Sample_3893_AT_7	ATTCCCGCAGTCTACA-1	adlib	ad_libitum_fed	Singlet	neuron	magnaclass1	0	0	0	0	0	0	0	0	0	0	1	0		1	64	1	17	82	1	10	0	0	0	0	yes
adlib_Sample_3893_AT_7	ATTCCCGGTGGTTTGT-1	adlib	ad_libitum_fed	Singlet	neuron	magnaclass2	0	0	0	0	0	0	0	0	0	0	0	0		0	0	0	0	0	0	0	0	0	0	0	no
adlib_Sample_3893_AT_7	ATTCCTAAGTCCGTCG-1	adlib	ad_libitum_fed	Singlet	neuron	magnaclass1	0	0	0	0	0	0	0	0	0	0	0	0		0	0	1	0	85	0	0	0	0	1	81	yes
adlib_Sample_3893_AT_7	ATTCCTACAATTGCGT-1	adlib	ad_libitum_fed	Singlet	neuron	magnaclass1	0	0	0	0	0	0	0	0	0	0	0	0		0	0	1	65	83	1	17	0	0	0	0	yes
adlib_Sample_3893_AT_7	ATTCCTACAATTGCTG-1	adlib	ad_libitum_fed	Singlet	neuron	magnaclass1	0	0	0	0	0	0	0	0	0	0	0	0		0	0	1	59	79	1	94	0	0	0	0	yes
adlib_Sample_3893_AT_7	ATTCCTACAGAGGTAC-1	adlib	ad_libitum_fed	Singlet	neuron	magnaclass1	0	0	0	0	0	0	0	0	0	0	1	0		1	28	1	0	15	1	13	0	0	0	0	yes
adlib_Sample_3893_AT_7	ATTCCTACAGGTCCCA-1	adlib	ad_libitum_fed	Singlet	neuron	Sall3_class	0	0	0	0	0	0	0	0	0	0	0	0		0	0	1	0	75	1	21	0	0	0	0	yes
adlib_Sample_3893_AT_7	ATTCCTAGTCCCGTGA-1	adlib	ad_libitum_fed	Singlet	neuron	magnaclass2	0	0	1	16	0	0	0	0	0	0	0	0		0	0	0	0	0	0	0	0	0	0	0	no
adlib_Sample_3893_AT_7	ATTCCTAGTGCCTAAT-1	adlib	ad_libitum_fed	Singlet	neuron	magnaclass2	0	0	0	0	0	0	0	0	0	0	0	0		0	0	0	0	0	0	0	0	0	0	0	no
adlib_Sample_3893_AT_7	ATTCCTAGTTGTCCCT-1	adlib	ad_libitum_fed	Singlet	neuron	monoamine_class	0	0	0	0	0	0	1	95	0	0	0	0		0	0	0	0	0	0	0	0	0	0	0	no
adlib_Sample_3893_AT_7	ATTCCTATCAAATGAG-1	adlib	ad_libitum_fed	Singlet	neuron	magnaclass1	0	0	0	0	0	0	0	0	0	0	1	0		1	18	1	15	10	1	34	1	24	0	0	yes
adlib_Sample_3893_AT_7	ATTCCTATCACCACAA-1	adlib	ad_libitum_fed	Singlet	neuron	preganglionic_class	0	0	1	53	0	0	0	0	0	0	1	1		1	26	0	0	0	0	0	0	0	0	0	yes
adlib_Sample_3893_AT_7	ATTCGTTCACACACGC-1	adlib	ad_libitum_fed	Singlet	neuron	magnaclass1	0	0	0	0	0	0	0	0	0	0	1	0		1	62	1	0	95	0	0	0	0	0	0	yes
adlib_Sample_3893_AT_7	ATTCGTTCACTACTTT-1	adlib	ad_libitum_fed	Singlet	neuron	Lrmda_class	0	0	0	0	0	0	0	0	0	0	0	0		0	0	1	0	83	1	30	0	0	0	0	yes
adlib_Sample_3893_AT_7	ATTCGTTCATGGGCAA-1	adlib	ad_libitum_fed	Singlet	neuron	monoamine_class	0	0	0	0	0	0	0	0	0	0	0	0		0	0	0	0	0	0	0	0	0	0	0	no
adlib_Sample_3893_AT_7	ATTCTACAGCTTACGT-1	adlib	ad_libitum_fed	Singlet	neuron	magnaclass2	0	0	0	0	0	0	0	0	0	0	1	0		1	9	0	0	0	0	0	0	0	0	0	no
adlib_Sample_3893_AT_7	ATTCTACAGTATGGCG-1	adlib	ad_libitum_fed	Singlet	neuron	magnaclass2	0	0	0	0	0	0	0	0	0	0	0	0		0	0	0	0	0	0	0	0	0	0	0	no
adlib_Sample_3893_AT_7	ATTCTACTCTATTTCG-1	adlib	ad_libitum_fed	Singlet	neuron	magnaclass1	0	0	0	0	0	0	0	0	0	0	1	0		1	47	1	89	0	1	61	0	0	0	0	yes
adlib_Sample_3893_AT_7	ATTCTACTCTTGGTGA-1	adlib	ad_libitum_fed	Singlet	neuron	Sall3_class	0	0	0	0	0	0	0	0	0	0	0	0		0	0	1	0	6	1	71	0	0	0	0	yes
adlib_Sample_3893_AT_7	ATTCTTGCAGCTACAT-1	adlib	ad_libitum_fed	Singlet	neuron	Sall3_class	0	0	0	0	0	0	0	0	0	0	0	0		0	0	0	0	0	0	0	0	0	0	0	no
adlib_Sample_3893_AT_7	ATTGGGTAGCTACTAC-1	adlib	ad_libitum_fed	Singlet	neuron	magnaclass2	0	0	0	0	0	0	0	0	0	0	0	0		0	0	0	0	0	0	0	0	0	0	0	no
adlib_Sample_3893_AT_7	ATTGGGTCAGTACTAC-1	adlib	ad_libitum_fed	Singlet	neuron	magnaclass2	0	0	0	0	1	46	0	0	0	0	0	0		0	0	0	0	0	0	0	0	0	0	0	no
adlib_Sample_3893_AT_7	ATTGGGTTCAAGCCGC-1	adlib	ad_libitum_fed	Singlet	neuron	magnaclass1	0	0	0	0	0	0	0	0	0	0	0	0		0	0	1	0	93	1	48	0	0	0	0	yes
adlib_Sample_3893_AT_7	ATTGTTCAGTCCCGGT-1	adlib	ad_libitum_fed	Singlet	neuron	monoamine_class	0	0	0	0	0	0	0	0	0	0	0	0		0	0	1	0	10	0	0	1	93	1	22	yes
adlib_Sample_3893_AT_7	ATTGTTCGTCTTGTCC-1	adlib	ad_libitum_fed	Singlet	neuron	magnaclass1	0	0	0	0	0	0	0	0	0	0	0	0		0	0	1	96	97	0	0	0	0	0	0	no
adlib_Sample_3893_AT_7	ATTGTTCGTGGGTTGA-1	adlib	ad_libitum_fed	Singlet	neuron	magnaclass2	0	0	0	0	0	0	0	0	0	0	0	0		0	0	0	0	0	0	0	0	0	0	0	no
adlib_Sample_3893_AT_7	ATTGTTCTCAGACTGT-1	adlib	ad_libitum_fed	Singlet	neuron	monoamine_class	0	0	0	0	0	0	0	0	0	0	0	0		0	0	0	0	0	0	0	0	0	0	0	no
adlib_Sample_3893_AT_7	ATTGTTCTCGTACACA-1	adlib	ad_libitum_fed	Singlet	neuron	magnaclass1	0	0	0	0	0	0	0	0	0	0	0	0		0	0	1	0	67	0	0	0	0	0	0	no
adlib_Sample_3893_AT_7	ATTTACCAGAAGGATG-1	adlib	ad_libitum_fed	Singlet	neuron	Sall3_class	0	0	0	0	0	0	0	0	0	0	0	0		0	0	1	0	93	1	95	0	0	0	0	yes
adlib_Sample_3893_AT_7	ATTTACCCATGGCTAT-1	adlib	ad_libitum_fed	Singlet	neuron	magnaclass1	0	0	0	0	0	0	0	0	0	0	1	0		1	49	1	75	0	1	26	0	0	0	0	yes
adlib_Sample_3893_AT_7	ATTTACCGTACCGGCT-1	adlib	ad_libitum_fed	Singlet	neuron	magnaclass1	0	0	0	0	0	0	0	0	0	0	1	0		1	63	1	66	19	1	3	1	89	0	0	yes
adlib_Sample_3893_AT_7	ATTTACCGTCGCACGT-1	adlib	ad_libitum_fed	Singlet	neuron	magnaclass2	0	0	0	0	0	0	0	0	0	0	0	0		0	0	0	0	0	0	0	1	42	0	0	no
adlib_Sample_3893_AT_7	ATTTCACAGCGACATG-1	adlib	ad_libitum_fed	Singlet	neuron	magnaclass1	0	0	0	0	0	0	0	0	0	0	1	0		1	42	0	0	0	0	0	0	0	0	0	no
adlib_Sample_3893_AT_7	ATTTCACCACTTTATC-1	adlib	ad_libitum_fed	Singlet	neuron	magnaclass1	0	0	0	0	0	0	0	0	0	0	1	0		1	45	1	73	89	1	24	0	0	0	0	yes
adlib_Sample_3893_AT_7	ATTTCACGTCGTGATT-1	adlib	ad_libitum_fed	Singlet	neuron	magnaclass2	0	0	0	0	0	0	0	0	0	0	1	0		1	85	0	0	0	0	0	0	0	1	99	yes
adlib_Sample_3893_AT_7	ATTTCACGTGACTGAG-1	adlib	ad_libitum_fed	Singlet	neuron	Sall3_class	0	0	0	0	0	0	0	0	0	0	0	0		0	0	1	0	30	1	30	1	54	1	79	yes
adlib_Sample_3893_AT_7	ATTTCACGTGAGTAAT-1	adlib	ad_libitum_fed	Singlet	neuron	magnaclass2	0	0	0	0	0	0	0	0	0	0	0	0		0	0	0	0	0	0	0	0	0	0	0	no
adlib_Sample_3893_AT_7	ATTTCACTCGCCTAGG-1	adlib	ad_libitum_fed	Singlet	neuron	corelautus_class	0	0	0	0	0	0	0	0	0	0	0	0		0	0	0	0	0	0	0	0	0	0	0	no
adlib_Sample_3893_AT_7	ATTTCACTCGTAGCCG-1	adlib	ad_libitum_fed	Singlet	neuron	magnaclass1	0	0	0	0	0	0	0	0	0	0	0	0		0	0	1	85	38	0	0	0	0	0	0	no
adlib_Sample_3893_AT_7	ATTTCTGAGAAACTGT-1	adlib	ad_libitum_fed	Singlet	neuron	magnaclass1	0	0	0	0	0	0	0	0	0	0	0	0		0	0	0	0	0	0	0	0	0	0	0	no
adlib_Sample_3893_AT_7	ATTTCTGGTACTCAAC-1	adlib	ad_libitum_fed	Singlet	neuron	magnaclass1	0	0	0	0	0	0	0	0	0	0	1	0		1	36	1	28	0	1	87	0	0	0	0	yes
adlib_Sample_3893_AT_7	CAAAGAAAGATACCAA-1	adlib	ad_libitum_fed	Singlet	neuron	magnaclass1	0	0	0	0	0	0	0	0	0	0	1	0		1	64	1	0	37	0	0	0	0	0	0	yes
adlib_Sample_3893_AT_7	CAAAGAAAGGCGAAGG-1	adlib	ad_libitum_fed	Singlet	neuron	Sall3_class	0	0	0	0	0	0	0	0	0	0	0	0		0	0	1	97	0	0	0	0	0	0	0	no
adlib_Sample_3893_AT_7	CAAAGAACAAACCATC-1	adlib	ad_libitum_fed	Singlet	neuron	monoamine_class	0	0	0	0	0	0	0	0	0	0	0	0		0	0	0	0	0	0	0	1	83	0	0	no
adlib_Sample_3893_AT_7	CAAAGAACATTACGGT-1	adlib	ad_libitum_fed	Singlet	neuron	magnaclass1	0	0	0	0	0	0	0	0	0	0	1	0		1	53	1	0	29	1	29	0	0	1	49	yes
adlib_Sample_3893_AT_7	CAAAGAAGTATTGACC-1	adlib	ad_libitum_fed	Singlet	neuron	magnaclass1	0	0	1	85	0	0	0	0	0	0	0	0		0	0	1	0	71	0	0	0	0	0	0	yes
adlib_Sample_3893_AT_7	CAAAGAAGTTGTCAGT-1	adlib	ad_libitum_fed	Singlet	neuron	Lhx2_class	0	0	0	0	0	0	0	0	0	0	1	0		1	17	0	0	0	0	0	0	0	1	21	yes
adlib_Sample_3893_AT_7	CAACAACAGGAGTCTG-1	adlib	ad_libitum_fed	Singlet	neuron	magnaclass2	0	0	0	0	0	0	0	0	0	0	0	0		0	0	0	0	0	0	0	0	0	0	0	no
adlib_Sample_3893_AT_7	CAACAACAGTTAGTAG-1	adlib	ad_libitum_fed	Singlet	neuron	magnaclass1	0	0	0	0	0	0	0	0	0	0	1	0		1	41	1	31	21	1	99	0	0	0	0	yes
adlib_Sample_3893_AT_7	CAACAACCAGGTCAAG-1	adlib	ad_libitum_fed	Singlet	neuron	magnaclass1	0	0	0	0	0	0	0	0	0	0	1	0		1	81	0	0	0	0	0	0	0	0	0	no
adlib_Sample_3893_AT_7	CAACAACGTATCGAAA-1	adlib	ad_libitum_fed	Singlet	neuron	Sall3_class	0	0	0	0	0	0	0	0	0	0	0	0		0	0	1	6	4	1	52	0	0	1	37	yes
adlib_Sample_3893_AT_7	CAACAACGTGAGACCA-1	adlib	ad_libitum_fed	Singlet	neuron	monoamine_class	0	0	1	98	0	0	0	0	0	0	0	0		0	0	0	0	0	0	0	0	0	0	0	no
adlib_Sample_3893_AT_7	CAACAACGTGCACGCT-1	adlib	ad_libitum_fed	Singlet	neuron	magnaclass1	0	0	0	0	0	0	0	0	0	0	1	0		1	38	1	29	0	0	0	1	73	1	84	yes
adlib_Sample_3893_AT_7	CAACAACTCGACGACC-1	adlib	ad_libitum_fed	Singlet	neuron	Lrmda_class	0	0	0	0	1	39	0	0	0	0	1	0		1	18	0	0	0	1	33	0	0	0	0	yes
adlib_Sample_3893_AT_7	CAACAACTCGCTTTAT-1	adlib	ad_libitum_fed	Singlet	neuron	Lhx2_class	0	0	0	0	0	0	0	0	0	0	0	0		0	0	0	0	0	0	0	0	0	1	27	no
adlib_Sample_3893_AT_7	CAACAACTCGTTGTTT-1	adlib	ad_libitum_fed	Singlet	neuron	Lhx2_class	0	0	0	0	0	0	0	0	0	0	1	0		1	8	0	0	0	0	0	0	0	0	0	no
adlib_Sample_3893_AT_7	CAACAACTCTAGACAC-1	adlib	ad_libitum_fed	Singlet	neuron	Lrmda_class	0	0	0	0	0	0	0	0	0	0	1	0		1	11	1	0	58	1	61	0	0	0	0	yes
adlib_Sample_3893_AT_7	CAACAACTCTCAATCT-1	adlib	ad_libitum_fed	Singlet	neuron	Sall3_class	0	0	0	0	0	0	0	0	0	0	0	0		0	0	1	14	0	1	33	0	0	0	0	yes
adlib_Sample_3893_AT_7	CAACAGTAGGGACCAT-1	adlib	ad_libitum_fed	Singlet	neuron	Sall3_class	0	0	0	0	0	0	0	0	0	0	1	0		1	72	0	0	0	1	82	0	0	0	0	yes
adlib_Sample_3893_AT_7	CAACAGTGTACCAATC-1	adlib	ad_libitum_fed	Singlet	neuron	Sall3_class	0	0	0	0	0	0	0	0	0	0	0	0		0	0	0	0	0	1	3	1	60	1	37	yes
adlib_Sample_3893_AT_7	CAACAGTGTACTCCCT-1	adlib	ad_libitum_fed	Singlet	neuron	magnaclass2	0	0	0	0	0	0	0	0	0	0	0	0		0	0	0	0	0	0	0	0	0	0	0	no
adlib_Sample_3893_AT_7	CAACAGTGTGTCCAAT-1	adlib	ad_libitum_fed	Singlet	neuron	magnaclass2	0	0	0	0	0	0	0	0	0	0	0	0		0	0	0	0	0	1	86	0	0	1	69	yes
adlib_Sample_3893_AT_7	CAACAGTGTTCCAAAC-1	adlib	ad_libitum_fed	Singlet	neuron	magnaclass2	0	0	0	0	0	0	0	0	0	0	1	0		1	15	0	0	0	0	0	0	0	1	69	yes
adlib_Sample_3893_AT_7	CAACAGTTCAGCTTGA-1	adlib	ad_libitum_fed	Singlet	neuron	monoamine_class	0	0	0	0	0	0	0	0	0	0	0	0		0	0	0	0	0	0	0	0	0	0	0	no
adlib_Sample_3893_AT_7	CAACCAAAGAGAGAAC-1	adlib	ad_libitum_fed	Singlet	neuron	Sall3_class	0	0	0	0	0	0	0	0	0	0	0	0		0	0	0	0	0	0	0	0	0	0	0	no
adlib_Sample_3893_AT_7	CAACCAAGTGGCGCTT-1	adlib	ad_libitum_fed	Singlet	neuron	magnaclass2	0	0	0	0	0	0	0	0	0	0	1	0		1	81	0	0	0	0	0	0	0	0	0	no
adlib_Sample_3893_AT_7	CAACCAAGTGTTACAC-1	adlib	ad_libitum_fed	Singlet	neuron	magnaclass1	0	0	0	0	0	0	0	0	0	0	0	0		0	0	1	0	20	0	0	0	0	1	71	yes
adlib_Sample_3893_AT_7	CAACCAATCAGCGCAC-1	adlib	ad_libitum_fed	Singlet	neuron	Lhx2_class	0	0	0	0	0	0	0	0	0	0	1	0		1	2	0	0	0	0	0	0	0	0	0	no
adlib_Sample_3893_AT_7	CAACCTCAGGTGTGAC-1	adlib	ad_libitum_fed	Singlet	neuron	magnaclass1	0	0	0	0	0	0	0	0	0	0	0	0		0	0	1	84	0	0	0	0	0	0	0	no
adlib_Sample_3893_AT_7	CAACCTCCAAGATCCT-1	adlib	ad_libitum_fed	Singlet	neuron	magnaclass2	0	0	0	0	0	0	0	0	0	0	0	0		0	0	0	0	0	0	0	0	0	0	0	no
adlib_Sample_3893_AT_7	CAACCTCCAGAAGTGC-1	adlib	ad_libitum_fed	Singlet	neuron	Lhx2_class	0	0	0	0	0	0	0	0	0	0	1	0		1	27	0	0	0	1	13	1	32	0	0	yes
adlib_Sample_3893_AT_7	CAACCTCCATAGAATG-1	adlib	ad_libitum_fed	Singlet	neuron	monoamine_class	0	0	0	0	0	0	0	0	0	0	0	0		0	0	0	0	0	0	0	0	0	1	74	no
adlib_Sample_3893_AT_7	CAACCTCGTTAAGGAT-1	adlib	ad_libitum_fed	Singlet	neuron	magnaclass1	0	0	0	0	0	0	0	0	0	0	0	0		0	0	0	0	0	1	39	0	0	0	0	no
adlib_Sample_3893_AT_7	CAACGATAGAGGTTTA-1	adlib	ad_libitum_fed	Singlet	neuron	magnaclass2	0	0	0	0	0	0	0	0	0	0	0	0		0	0	0	0	0	0	0	0	0	0	0	no
adlib_Sample_3893_AT_7	CAACGATCATCACCAA-1	adlib	ad_libitum_fed	Singlet	neuron	magnaclass1	0	0	0	0	0	0	0	0	0	0	1	0		1	23	1	53	39	1	62	1	63	0	0	yes
adlib_Sample_3893_AT_7	CAACGATGTACGTAGG-1	adlib	ad_libitum_fed	Singlet	neuron	monoamine_class	0	0	0	0	0	0	0	0	0	0	0	0		0	0	0	0	0	0	0	1	71	0	0	no
adlib_Sample_3893_AT_7	CAACGGCGTCATATGC-1	adlib	ad_libitum_fed	Singlet	neuron	Sall3_class	0	0	1	25	0	0	0	0	0	0	1	0		1	89	1	0	15	1	45	0	0	0	0	yes
adlib_Sample_3893_AT_7	CAACGGCGTCATCCCT-1	adlib	ad_libitum_fed	Singlet	neuron	Lhx2_class	0	0	0	0	0	0	0	0	0	0	0	0		0	0	0	0	0	0	0	0	0	0	0	no
adlib_Sample_3893_AT_7	CAACGGCTCACGTCCT-1	adlib	ad_libitum_fed	Singlet	neuron	magnaclass1	0	0	0	0	1	20	0	0	0	0	1	0		1	75	1	0	17	1	15	0	0	0	0	yes
adlib_Sample_3893_AT_7	CAACGGCTCGCCAGTG-1	adlib	ad_libitum_fed	Singlet	neuron	monoamine_class	0	0	1	82	0	0	0	0	0	0	0	0		0	0	0	0	0	0	0	1	71	0	0	yes
adlib_Sample_3893_AT_7	CAAGACTGTTAGCGGA-1	adlib	ad_libitum_fed	Singlet	neuron	magnaclass2	0	0	0	0	1	62	0	0	0	0	0	0		0	0	0	0	0	0	0	1	44	0	0	yes
adlib_Sample_3893_AT_7	CAAGACTGTTATGTGC-1	adlib	ad_libitum_fed	Singlet	neuron	magnaclass1	0	0	0	0	0	0	0	0	0	0	1	0		1	49	1	38	27	1	26	0	0	1	17	yes
adlib_Sample_3893_AT_7	CAAGACTTCGAGAGAC-1	adlib	ad_libitum_fed	Singlet	neuron	magnaclass2	0	0	1	36	0	0	0	0	0	0	1	0		1	45	0	0	0	0	0	0	0	0	0	yes
adlib_Sample_3893_AT_7	CAAGAGGGTGCATACT-1	adlib	ad_libitum_fed	Singlet	neuron	monoamine_class	0	0	1	60	0	0	0	0	0	0	1	0		1	36	0	0	0	0	0	0	0	0	0	yes
adlib_Sample_3893_AT_7	CAAGAGGGTGTGTCCG-1	adlib	ad_libitum_fed	Singlet	neuron	magnaclass1	0	0	0	0	0	0	0	0	1	64	1	0		1	67	1	54	13	1	95	0	0	0	0	yes
adlib_Sample_3893_AT_7	CAAGAGGGTTTACTGG-1	adlib	ad_libitum_fed	Singlet	neuron	Lhx2_class	0	0	0	0	0	0	0	0	0	0	0	0		0	0	0	0	0	0	0	0	0	0	0	no
adlib_Sample_3893_AT_7	CAAGCTAAGACTCTTG-1	adlib	ad_libitum_fed	Singlet	neuron	Lhx2_class	1	36	0	0	0	0	0	0	0	0	0	0		0	0	0	0	0	0	0	0	0	0	0	no
adlib_Sample_3893_AT_7	CAAGCTAAGCTGAGTG-1	adlib	ad_libitum_fed	Singlet	neuron	magnaclass1	0	0	0	0	0	0	0	0	0	0	1	0		1	85	1	73	0	1	61	1	78	0	0	yes
adlib_Sample_3893_AT_7	CAAGCTAAGGTCACTT-1	adlib	ad_libitum_fed	Singlet	neuron	Lrmda_class	0	0	0	0	0	0	0	0	0	0	0	0		0	0	0	0	0	0	0	0	0	0	0	no
adlib_Sample_3893_AT_7	CAAGCTATCCATCTAT-1	adlib	ad_libitum_fed	Singlet	neuron	magnaclass1	0	0	0	0	0	0	0	0	0	0	0	0		0	0	0	0	0	0	0	0	0	1	89	no
adlib_Sample_3893_AT_7	CAAGCTATCGGTCACG-1	adlib	ad_libitum_fed	Singlet	neuron	magnaclass1	0	0	0	0	0	0	0	0	0	0	0	0		0	0	1	48	55	1	9	0	0	0	0	yes
adlib_Sample_3893_AT_7	CAAGGGAAGTATAGAC-1	adlib	ad_libitum_fed	Singlet	neuron	magnaclass2	0	0	0	0	0	0	0	0	0	0	1	0		1	41	0	0	0	0	0	1	75	0	0	yes
adlib_Sample_3893_AT_7	CAAGGGAGTCACTCGG-1	adlib	ad_libitum_fed	Singlet	neuron	Lhx2_class	0	0	0	0	0	0	0	0	0	0	0	0		0	0	0	0	0	0	0	0	0	0	0	no
adlib_Sample_3893_AT_7	CAAGGGAGTGGTATGG-1	adlib	ad_libitum_fed	Singlet	neuron	magnaclass2	0	0	0	0	0	0	0	0	0	0	0	0		0	0	0	0	0	0	0	1	95	0	0	no
adlib_Sample_3893_AT_7	CAAGGGATCCAACACA-1	adlib	ad_libitum_fed	Singlet	neuron	magnaclass1	0	0	0	0	0	0	0	0	0	0	0	0		0	0	1	89	25	1	25	0	0	0	0	yes
adlib_Sample_3893_AT_7	CAAGGGATCGAGATGG-1	adlib	ad_libitum_fed	Singlet	neuron	magnaclass2	0	0	0	0	1	49	0	0	0	0	1	0		1	71	0	0	0	0	0	0	0	0	0	yes
adlib_Sample_3893_AT_7	CAATACGAGCTCATAC-1	adlib	ad_libitum_fed	Singlet	neuron	magnaclass2	0	0	0	0	0	0	0	0	0	0	1	0		1	37	0	0	0	0	0	0	0	1	93	yes
adlib_Sample_3893_AT_7	CAATACGGTGCTCGTG-1	adlib	ad_libitum_fed	Singlet	neuron	Sall3_class	0	0	0	0	0	0	0	0	0	0	1	0		1	60	0	0	0	1	35	1	59	0	0	yes
adlib_Sample_3893_AT_7	CAATACGTCAGCACCG-1	adlib	ad_libitum_fed	Singlet	neuron	Lrmda_class	0	0	0	0	1	23	0	0	0	0	1	1		1	6	0	0	0	0	0	0	0	0	0	yes
adlib_Sample_3893_AT_7	CAATACGTCGCAACAT-1	adlib	ad_libitum_fed	Singlet	neuron	magnaclass2	0	0	0	0	0	0	0	0	0	0	0	0		0	0	0	0	0	0	0	0	0	0	0	no
adlib_Sample_3893_AT_7	CAATACGTCTAGAACC-1	adlib	ad_libitum_fed	Singlet	neuron	magnaclass2	0	0	0	0	0	0	0	0	0	0	1	0		1	6	0	0	0	0	0	0	0	0	0	no
adlib_Sample_3893_AT_7	CAATCGAAGAGGTGCT-1	adlib	ad_libitum_fed	Singlet	neuron	magnaclass2	0	0	0	0	0	0	0	0	0	0	1	0		1	97	0	0	0	0	0	0	0	0	0	no
adlib_Sample_3893_AT_7	CAATCGAAGTGGTGGT-1	adlib	ad_libitum_fed	Singlet	neuron	Lhx2_class	0	0	0	0	0	0	0	0	0	0	0	0		0	0	0	0	0	0	0	0	0	0	0	no
adlib_Sample_3893_AT_7	CAATCGAGTAAGACCG-1	adlib	ad_libitum_fed	Singlet	neuron	Lrmda_class	0	0	0	0	0	0	0	0	0	0	1	0		1	43	1	71	23	0	0	0	0	0	0	yes
adlib_Sample_3893_AT_7	CAATCGAGTAGTCACT-1	adlib	ad_libitum_fed	Singlet	neuron	monoamine_class	0	0	0	0	0	0	0	0	0	0	1	0		1	79	0	0	0	0	0	0	0	0	0	no
adlib_Sample_3893_AT_7	CAATCGAGTGCCTGCA-1	adlib	ad_libitum_fed	Singlet	neuron	Lrmda_class	0	0	0	0	0	0	0	0	0	0	1	0		1	18	0	0	0	1	34	0	0	0	0	yes
adlib_Sample_3893_AT_7	CAATCGATCCGCGGAT-1	adlib	ad_libitum_fed	Singlet	neuron	monoamine_class	0	0	1	59	1	55	0	0	0	0	0	0		0	0	0	0	0	0	0	0	0	0	0	no
adlib_Sample_3893_AT_7	CAATCGATCCGTTGGG-1	adlib	ad_libitum_fed	Singlet	neuron	magnaclass1	0	0	0	0	0	0	0	0	0	0	0	0		0	0	0	0	0	0	0	0	0	0	0	no
adlib_Sample_3893_AT_7	CAATCGATCGCATTGA-1	adlib	ad_libitum_fed	Singlet	neuron	Lhx2_class	0	0	0	0	0	0	0	0	0	0	0	0		0	0	0	0	0	0	0	0	0	0	0	no
adlib_Sample_3893_AT_7	CAATCGATCTAGCATG-1	adlib	ad_libitum_fed	Singlet	neuron	Sall3_class	0	0	0	0	0	0	0	0	0	0	0	0		0	0	1	0	64	0	0	0	0	1	79	yes
adlib_Sample_3893_AT_7	CAATGACAGTCGCTAT-1	adlib	ad_libitum_fed	Singlet	neuron	magnaclass2	0	0	0	0	0	0	0	0	0	0	0	0		0	0	0	0	0	0	0	0	0	0	0	no
adlib_Sample_3893_AT_7	CAATGACCAGTATGAA-1	adlib	ad_libitum_fed	Singlet	neuron	magnaclass2	0	0	0	0	0	0	0	0	0	0	0	0		0	0	0	0	0	0	0	0	0	1	75	no
adlib_Sample_3893_AT_7	CAATGACGTAGATCCT-1	adlib	ad_libitum_fed	Singlet	neuron	magnaclass2	0	0	0	0	0	0	0	0	0	0	0	0		0	0	0	0	0	0	0	0	0	0	0	no
adlib_Sample_3893_AT_7	CAATGACTCGTGTGAT-1	adlib	ad_libitum_fed	Singlet	neuron	magnaclass2	0	0	0	0	0	0	0	0	0	0	1	0		1	71	0	0	0	0	0	0	0	0	0	no
adlib_Sample_3893_AT_7	CAATTTCGTAGTGTGG-1	adlib	ad_libitum_fed	Singlet	neuron	magnaclass2	0	0	0	0	0	0	0	0	0	0	1	0		1	24	1	0	75	1	11	0	0	0	0	yes
adlib_Sample_3893_AT_7	CAATTTCGTATGAGGC-1	adlib	ad_libitum_fed	Singlet	neuron	magnaclass1	0	0	0	0	0	0	0	0	0	0	1	0		1	38	1	0	95	1	76	0	0	0	0	yes
adlib_Sample_3893_AT_7	CAATTTCTCACCTACC-1	adlib	ad_libitum_fed	Singlet	neuron	corelautus_class	0	0	0	0	0	0	0	0	0	0	0	0		0	0	1	0	93	0	0	0	0	0	0	no
adlib_Sample_3893_AT_7	CAATTTCTCCCAGTGG-1	adlib	ad_libitum_fed	Singlet	neuron	monoamine_class	0	0	1	95	0	0	0	0	0	0	1	0		1	74	0	0	0	0	0	0	0	0	0	yes
adlib_Sample_3893_AT_7	CAATTTCTCTGGTCAA-1	adlib	ad_libitum_fed	Singlet	neuron	magnaclass1	0	0	0	0	0	0	0	0	0	0	1	0		1	91	0	0	0	0	0	0	0	0	0	no
adlib_Sample_3893_AT_7	CACAACAAGGTCATCT-1	adlib	ad_libitum_fed	Singlet	neuron	magnaclass2	0	0	0	0	1	43	0	0	0	0	0	0		0	0	0	0	0	0	0	0	0	1	57	yes
adlib_Sample_3893_AT_7	CACAACATCCTCACGT-1	adlib	ad_libitum_fed	Singlet	neuron	magnaclass1	0	0	0	0	0	0	0	0	0	0	1	0		1	23	1	0	38	1	38	0	0	1	26	yes
adlib_Sample_3893_AT_7	CACAACATCGCCTCTA-1	adlib	ad_libitum_fed	Singlet	neuron	magnaclass2	0	0	0	0	0	0	0	0	0	0	1	0		1	12	1	0	7	1	63	0	0	0	0	yes
adlib_Sample_3893_AT_7	CACACAATCTGGCCAG-1	adlib	ad_libitum_fed	Singlet	neuron	Sall3_class	0	0	0	0	0	0	0	0	0	0	1	0		1	67	1	54	0	1	63	0	0	0	0	yes
adlib_Sample_3893_AT_7	CACAGATAGTGTACAA-1	adlib	ad_libitum_fed	Singlet	neuron	magnaclass2	0	0	0	0	0	0	0	0	0	0	0	0		0	0	0	0	0	0	0	1	76	1	91	yes
adlib_Sample_3893_AT_7	CACAGATCATCGGCCA-1	adlib	ad_libitum_fed	Singlet	neuron	magnaclass1	0	0	0	0	0	0	0	0	0	0	1	0		1	51	1	76	62	0	0	0	0	0	0	yes
adlib_Sample_3893_AT_7	CACAGATGTAGCGATG-1	adlib	ad_libitum_fed	Singlet	neuron	Sall3_class	0	0	0	0	0	0	0	0	0	0	0	0		0	0	0	0	0	1	43	0	0	0	0	no
adlib_Sample_3893_AT_7	CACAGGCAGAGCCCAA-1	adlib	ad_libitum_fed	Singlet	neuron	magnaclass1	0	0	0	0	0	0	0	0	0	0	0	0		0	0	1	0	92	0	0	0	0	0	0	no
adlib_Sample_3893_AT_7	CACAGGCAGATGCTGG-1	adlib	ad_libitum_fed	Singlet	neuron	magnaclass1	0	0	0	0	0	0	0	0	0	0	0	0		0	0	0	0	0	1	62	1	78	1	98	yes
adlib_Sample_3893_AT_7	CACAGGCGTAGTAAGT-1	adlib	ad_libitum_fed	Singlet	neuron	magnaclass2	0	0	0	0	0	0	0	0	0	0	0	0		0	0	0	0	0	0	0	0	0	0	0	no
adlib_Sample_3893_AT_7	CACATGACATCCAATG-1	adlib	ad_libitum_fed	Singlet	neuron	magnaclass1	0	0	0	0	0	0	0	0	0	0	1	0		1	53	1	0	8	1	29	0	0	0	0	yes
adlib_Sample_3893_AT_7	CACATGATCTATCACT-1	adlib	ad_libitum_fed	Singlet	neuron	magnaclass2	0	0	0	0	0	0	0	0	0	0	1	0		1	54	0	0	0	0	0	0	0	0	0	no
adlib_Sample_3893_AT_7	CACCAAACACGTAGAG-1	adlib	ad_libitum_fed	Singlet	neuron	Sall3_class	0	0	0	0	0	0	0	0	0	0	1	0		1	72	1	0	44	1	45	0	0	0	0	yes
adlib_Sample_3893_AT_7	CACCAAACACTCCTTG-1	adlib	ad_libitum_fed	Singlet	neuron	magnaclass1	0	0	0	0	0	0	0	0	0	0	0	0		0	0	1	84	36	1	36	0	0	0	0	yes
adlib_Sample_3893_AT_7	CACCAAATCTCGGGAC-1	adlib	ad_libitum_fed	Singlet	neuron	magnaclass1	0	0	0	0	1	53	0	0	0	0	0	0		0	0	1	80	0	0	0	0	0	0	0	yes
adlib_Sample_3893_AT_7	CACCGTTAGATGAAGG-1	adlib	ad_libitum_fed	Singlet	neuron	Lrmda_class	0	0	0	0	0	0	0	0	0	0	0	0		0	0	1	0	18	1	17	1	39	0	0	yes
adlib_Sample_3893_AT_7	CACCGTTAGGATTTAG-1	adlib	ad_libitum_fed	Singlet	neuron	monoamine_class	0	0	0	0	0	0	0	0	0	0	0	0		0	0	0	0	0	0	0	0	0	0	0	no
adlib_Sample_3893_AT_7	CACCGTTCAGCCGTTG-1	adlib	ad_libitum_fed	Singlet	neuron	Lrmda_class	0	0	0	0	0	0	0	0	0	0	0	0		0	0	0	0	0	1	84	0	0	0	0	no
adlib_Sample_3893_AT_7	CACCGTTCAGCTGCCA-1	adlib	ad_libitum_fed	Singlet	neuron	magnaclass1	0	0	0	0	0	0	0	0	0	0	0	0		0	0	1	0	70	1	35	0	0	0	0	yes
adlib_Sample_3893_AT_7	CACCGTTGTATCGCGC-1	adlib	ad_libitum_fed	Singlet	neuron	monoamine_class	0	0	0	0	0	0	0	0	0	0	1	0		1	42	1	0	100	0	0	0	0	0	0	yes
adlib_Sample_3893_AT_7	CACCGTTTCCCTATTA-1	adlib	ad_libitum_fed	Singlet	neuron	magnaclass2	0	0	0	0	0	0	0	0	0	0	1	0		1	56	0	0	0	0	0	1	55	0	0	yes
adlib_Sample_3893_AT_7	CACGAATTCCGACGGT-1	adlib	ad_libitum_fed	Singlet	neuron	magnaclass2	0	0	0	0	0	0	0	0	0	0	1	0		1	56	0	0	0	0	0	0	0	0	0	no
adlib_Sample_3893_AT_7	CACGAATTCTCATAGG-1	adlib	ad_libitum_fed	Singlet	neuron	magnaclass2	0	0	0	0	1	78	0	0	0	0	0	0		0	0	0	0	0	0	0	0	0	0	0	no
adlib_Sample_3893_AT_7	CACGGGTAGCAATTAG-1	adlib	ad_libitum_fed	Singlet	neuron	Lhx2_class	0	0	0	0	0	0	0	0	0	0	0	0		0	0	0	0	0	0	0	0	0	0	0	no
adlib_Sample_3893_AT_7	CACGGGTCACTTACAG-1	adlib	ad_libitum_fed	Singlet	neuron	magnaclass1	0	0	0	0	0	0	0	0	0	0	0	0		0	0	0	0	0	0	0	0	0	1	78	no
adlib_Sample_3893_AT_7	CACGTGGAGACTGAGC-1	adlib	ad_libitum_fed	Singlet	neuron	magnaclass1	0	0	0	0	0	0	0	0	0	0	0	0		0	0	1	99	61	0	0	0	0	0	0	no
adlib_Sample_3893_AT_7	CACGTGGAGATCCTAC-1	adlib	ad_libitum_fed	Singlet	neuron	magnaclass2	0	0	0	0	0	0	0	0	0	0	1	0		1	50	0	0	0	0	0	0	0	0	0	no
adlib_Sample_3893_AT_7	CACGTGGAGGCGAAGG-1	adlib	ad_libitum_fed	Singlet	neuron	monoamine_class	0	0	1	35	1	63	0	0	0	0	0	0		0	0	0	0	0	0	0	0	0	1	74	yes
adlib_Sample_3893_AT_7	CACGTGGCAATATCCG-1	adlib	ad_libitum_fed	Singlet	neuron	magnaclass2	0	0	0	0	0	0	0	0	0	0	0	0		0	0	1	0	82	0	0	0	0	0	0	no
adlib_Sample_3893_AT_7	CACGTGGGTGACTGTT-1	adlib	ad_libitum_fed	Singlet	neuron	magnaclass2	0	0	0	0	0	0	0	0	0	0	1	0		1	92	0	0	0	0	0	0	0	0	0	no
adlib_Sample_3893_AT_7	CACGTGGGTTTGAAAG-1	adlib	ad_libitum_fed	Singlet	neuron	Lhx2_class	0	0	0	0	0	0	0	0	0	0	1	0		1	38	0	0	0	0	0	0	0	0	0	no
adlib_Sample_3893_AT_7	CACGTGGTCTAGCATG-1	adlib	ad_libitum_fed	Singlet	neuron	magnaclass1	0	0	0	0	0	0	0	0	0	0	1	0		1	24	1	53	59	0	0	0	0	0	0	yes
adlib_Sample_3893_AT_7	CACGTTCCACGACGTC-1	adlib	ad_libitum_fed	Singlet	neuron	Lrmda_class	0	0	0	0	0	0	0	0	0	0	1	0		1	7	0	0	0	1	45	0	0	0	0	yes
adlib_Sample_3893_AT_7	CACGTTCTCGCTTTAT-1	adlib	ad_libitum_fed	Singlet	neuron	magnaclass1	0	0	0	0	0	0	0	0	0	0	0	0		0	0	1	73	73	1	10	0	0	0	0	yes
adlib_Sample_3893_AT_7	CACGTTCTCGTGTTCC-1	adlib	ad_libitum_fed	Singlet	neuron	Lhx2_class	0	0	0	0	0	0	0	0	0	0	0	0		0	0	0	0	0	0	0	0	0	0	0	no
adlib_Sample_3893_AT_7	CACTAAGAGAACAGGA-1	adlib	ad_libitum_fed	Singlet	neuron	monoamine_class	0	0	0	0	0	0	1	76	0	0	1	0		1	82	0	0	0	0	0	0	0	0	0	yes
adlib_Sample_3893_AT_7	CACTAAGAGAAGGGAT-1	adlib	ad_libitum_fed	Singlet	neuron	monoamine_class	0	0	0	0	0	0	0	0	0	0	1	0		1	92	0	0	0	1	74	0	0	0	0	yes
adlib_Sample_3893_AT_7	CACTAAGAGAGTGTGC-1	adlib	ad_libitum_fed	Singlet	neuron	magnaclass2	0	0	0	0	1	69	0	0	0	0	0	0		0	0	0	0	0	0	0	0	0	0	0	no
adlib_Sample_3893_AT_7	CACTGAAAGCAACTCT-1	adlib	ad_libitum_fed	Singlet	neuron	magnaclass1	0	0	0	0	0	0	0	0	0	0	0	0		0	0	1	78	29	1	29	0	0	0	0	yes
adlib_Sample_3893_AT_7	CACTGAAAGTAGCCAG-1	adlib	ad_libitum_fed	Singlet	neuron	Lhx2_class	0	0	0	0	0	0	0	0	0	0	0	0		0	0	0	0	0	0	0	0	0	1	13	no
adlib_Sample_3893_AT_7	CACTGAACAATCGTCA-1	adlib	ad_libitum_fed	Singlet	neuron	Lrmda_class	0	0	0	0	0	0	0	0	0	0	0	0		0	0	1	22	15	1	68	0	0	0	0	yes
adlib_Sample_3893_AT_7	CACTGAAGTCGATTCA-1	adlib	ad_libitum_fed	Singlet	neuron	magnaclass1	0	0	0	0	0	0	0	0	0	0	0	0		0	0	1	91	0	0	0	0	0	0	0	no
adlib_Sample_3893_AT_7	CACTGGGCAACAGCCC-1	adlib	ad_libitum_fed	Singlet	neuron	magnaclass1	0	0	0	0	0	0	0	0	0	0	1	0		1	72	1	79	44	0	0	0	0	0	0	yes
adlib_Sample_3893_AT_7	CACTGGGCATCGAACT-1	adlib	ad_libitum_fed	Singlet	neuron	monoamine_class	0	0	0	0	0	0	0	0	0	0	0	0		0	0	0	0	0	0	0	0	0	1	91	no
adlib_Sample_3893_AT_7	CACTGGGGTGAATATG-1	adlib	ad_libitum_fed	Singlet	neuron	Lrmda_class	0	0	0	0	0	0	0	0	0	0	0	0		0	0	0	0	0	0	0	0	0	0	0	no
adlib_Sample_3893_AT_7	CACTGGGTCTTAGGAC-1	adlib	ad_libitum_fed	Singlet	neuron	Lhx2_class	0	0	0	0	0	0	0	0	0	0	1	0		1	15	0	0	0	0	0	0	0	1	20	yes
adlib_Sample_3893_AT_7	CACTGTCAGTTGTAGA-1	adlib	ad_libitum_fed	Singlet	neuron	magnaclass1	0	0	0	0	0	0	0	0	0	0	1	0		1	94	1	87	0	0	0	0	0	0	0	yes
adlib_Sample_3893_AT_7	CACTGTCGTTTGTTCT-1	adlib	ad_libitum_fed	Singlet	neuron	Lrmda_class	0	0	0	0	0	0	0	0	0	0	0	0		0	0	1	0	92	0	0	0	0	0	0	no
adlib_Sample_3893_AT_7	CACTTCGCAACCGTGC-1	adlib	ad_libitum_fed	Singlet	neuron	magnaclass2	0	0	1	49	0	0	0	0	0	0	0	0		0	0	0	0	0	0	0	0	0	0	0	no
adlib_Sample_3893_AT_7	CACTTCGCACTGAGGA-1	adlib	ad_libitum_fed	Singlet	neuron	magnaclass2	0	0	0	0	0	0	0	0	0	0	1	0		1	37	0	0	0	0	0	0	0	0	0	no
adlib_Sample_3893_AT_7	CACTTCGCAGCGACCT-1	adlib	ad_libitum_fed	Singlet	neuron	corelautus_class	0	0	0	0	0	0	0	0	0	0	0	0		0	0	0	0	0	0	0	0	0	0	0	no
adlib_Sample_3893_AT_7	CACTTCGGTCGCGGTT-1	adlib	ad_libitum_fed	Singlet	neuron	magnaclass2	0	0	0	0	0	0	0	0	0	0	1	0		1	30	0	0	0	0	0	0	0	1	65	yes
adlib_Sample_3893_AT_7	CACTTCGTCAATCCAG-1	adlib	ad_libitum_fed	Singlet	neuron	magnaclass1	0	0	0	0	0	0	0	0	0	0	0	0		0	0	1	0	89	0	0	0	0	0	0	no
adlib_Sample_3893_AT_7	CAGAGCCGTAATTGGA-1	adlib	ad_libitum_fed	Singlet	neuron	magnaclass2	0	0	0	0	1	70	0	0	0	0	0	0		0	0	1	41	0	0	0	0	0	0	0	yes
adlib_Sample_3893_AT_7	CAGATACAGTGTTCCA-1	adlib	ad_libitum_fed	Singlet	neuron	Lrmda_class	0	0	0	0	0	0	0	0	0	0	1	0		1	45	1	0	24	1	24	0	0	0	0	yes
adlib_Sample_3893_AT_7	CAGATACGTCCGCAGT-1	adlib	ad_libitum_fed	Singlet	neuron	magnaclass2	0	0	0	0	0	0	0	0	0	0	0	0		0	0	0	0	0	0	0	0	0	0	0	no
adlib_Sample_3893_AT_7	CAGATACGTTTCGCTC-1	adlib	ad_libitum_fed	Singlet	neuron	magnaclass1	0	0	0	0	0	0	0	0	0	0	1	0		1	81	1	86	86	0	0	0	0	0	0	yes
adlib_Sample_3893_AT_7	CAGATACGTTTCGGCG-1	adlib	ad_libitum_fed	Singlet	neuron	corelautus_class	0	0	0	0	0	0	0	0	0	0	0	0		0	0	0	0	0	0	0	0	0	0	0	no
adlib_Sample_3893_AT_7	CAGATACTCCAACACA-1	adlib	ad_libitum_fed	Singlet	neuron	Sall3_class	0	0	0	0	0	0	0	0	0	0	1	0		1	14	1	12	29	1	50	0	0	1	50	yes
adlib_Sample_3893_AT_7	CAGATCACACTTTAGG-1	adlib	ad_libitum_fed	Singlet	neuron	magnaclass2	0	0	0	0	0	0	0	0	0	0	1	0		1	90	0	0	0	0	0	0	0	0	0	no
adlib_Sample_3893_AT_7	CAGATCACATGCAGCC-1	adlib	ad_libitum_fed	Singlet	neuron	magnaclass1	0	0	0	0	0	0	0	0	0	0	1	0		1	10	1	34	0	1	23	0	0	0	0	yes
adlib_Sample_3893_AT_7	CAGATCACATTGGCAT-1	adlib	ad_libitum_fed	Singlet	neuron	magnaclass1	0	0	0	0	1	86	0	0	0	0	1	0		1	78	0	0	0	1	52	0	0	0	0	yes
adlib_Sample_3893_AT_7	CAGATCAGTACAATAG-1	adlib	ad_libitum_fed	Singlet	neuron	Lrmda_class	0	0	0	0	0	0	0	0	0	0	0	0		0	0	1	0	32	1	32	0	0	1	53	yes
adlib_Sample_3893_AT_7	CAGATCAGTTGACGGA-1	adlib	ad_libitum_fed	Singlet	neuron	magnaclass2	0	0	0	0	0	0	0	0	0	0	0	0		0	0	0	0	0	0	0	0	0	0	0	no
adlib_Sample_3893_AT_7	CAGATTGCAGGTGGAT-1	adlib	ad_libitum_fed	Singlet	neuron	Lhx2_class	0	0	0	0	0	0	0	0	0	0	0	0		0	0	0	0	0	0	0	0	0	0	0	no
adlib_Sample_3893_AT_7	CAGATTGCATTGGATC-1	adlib	ad_libitum_fed	Singlet	neuron	magnaclass1	0	0	0	0	0	0	0	0	0	0	0	0		0	0	1	56	0	0	0	0	0	0	0	no
adlib_Sample_3893_AT_7	CAGATTGTCACTTGGA-1	adlib	ad_libitum_fed	Singlet	neuron	magnaclass2	0	0	0	0	0	0	0	0	0	0	1	0		1	46	1	58	43	1	5	0	0	0	0	yes
adlib_Sample_3893_AT_7	CAGATTGTCGCAATGT-1	adlib	ad_libitum_fed	Singlet	neuron	Lrmda_class	0	0	0	0	0	0	0	0	0	0	0	0		0	0	0	0	0	1	21	0	0	0	0	no
adlib_Sample_3893_AT_7	CAGCAATAGTGCTCGC-1	adlib	ad_libitum_fed	Singlet	neuron	magnaclass1	0	0	0	0	0	0	0	0	0	0	0	0		0	0	1	46	0	1	72	0	0	1	90	yes
adlib_Sample_3893_AT_7	CAGCAATGTTGGACTT-1	adlib	ad_libitum_fed	Singlet	neuron	magnaclass2	0	0	0	0	0	0	0	0	0	0	0	0		0	0	0	0	0	0	0	1	56	0	0	no
adlib_Sample_3893_AT_7	CAGCACGAGCTAATCC-1	adlib	ad_libitum_fed	Singlet	neuron	magnaclass2	0	0	0	0	0	0	0	0	0	0	0	0		0	0	1	0	22	0	0	0	0	0	0	no
adlib_Sample_3893_AT_7	CAGCACGAGGGCAGTT-1	adlib	ad_libitum_fed	Singlet	neuron	Sall3_class	0	0	0	0	1	58	0	0	0	0	0	0		0	0	1	65	0	1	18	0	0	0	0	yes
adlib_Sample_3893_AT_7	CAGCACGCAGGCATGA-1	adlib	ad_libitum_fed	Singlet	neuron	magnaclass2	0	0	0	0	0	0	0	0	0	0	0	0		0	0	0	0	0	0	0	0	0	1	33	no
adlib_Sample_3893_AT_7	CAGCACGCAGTAACCT-1	adlib	ad_libitum_fed	Singlet	neuron	magnaclass2	0	0	0	0	0	0	0	0	0	0	0	0		0	0	0	0	0	0	0	0	0	0	0	no
adlib_Sample_3893_AT_7	CAGCACGGTCCCTGTT-1	adlib	ad_libitum_fed	Singlet	neuron	Sall3_class	0	0	0	0	0	0	0	0	0	0	1	0		1	23	1	0	38	1	76	0	0	0	0	yes
adlib_Sample_3893_AT_7	CAGCACGTCCGGTAGC-1	adlib	ad_libitum_fed	Singlet	neuron	magnaclass1	0	0	0	0	0	0	0	0	0	0	1	0		1	40	1	30	0	1	20	0	0	1	39	yes
adlib_Sample_3893_AT_7	CAGCAGCAGTACTGTC-1	adlib	ad_libitum_fed	Singlet	neuron	magnaclass1	0	0	0	0	0	0	0	0	0	0	1	0		1	10	0	0	0	1	23	0	0	0	0	yes
adlib_Sample_3893_AT_7	CAGCAGCAGTGCCAGA-1	adlib	ad_libitum_fed	Singlet	neuron	Sall3_class	0	0	0	0	0	0	0	0	0	0	0	0		0	0	1	0	12	1	92	0	0	1	60	yes
adlib_Sample_3893_AT_7	CAGCAGCGTCCAGCGT-1	adlib	ad_libitum_fed	Singlet	neuron	Lhx2_class	0	0	0	0	0	0	0	0	0	0	1	0		1	47	0	0	0	0	0	0	0	0	0	no
adlib_Sample_3893_AT_7	CAGCAGCTCCCTTTGG-1	adlib	ad_libitum_fed	Singlet	neuron	monoamine_class	0	0	0	0	0	0	0	0	0	0	0	0		0	0	0	0	0	0	0	0	0	0	0	no
adlib_Sample_3893_AT_7	CAGCAGCTCTGCGAGC-1	adlib	ad_libitum_fed	Singlet	neuron	Lrmda_class	0	0	0	0	0	0	0	0	0	0	1	0		1	72	0	0	0	0	0	0	0	0	0	no
adlib_Sample_3893_AT_7	CAGCCAGAGGGCCCTT-1	adlib	ad_libitum_fed	Singlet	neuron	magnaclass1	0	0	0	0	0	0	0	0	0	0	1	0		1	28	1	0	63	1	13	0	0	0	0	yes
adlib_Sample_3893_AT_7	CAGCCAGAGGTTAGTA-1	adlib	ad_libitum_fed	Singlet	neuron	magnaclass1	0	0	0	0	0	0	0	0	0	0	1	0		1	44	1	71	96	1	59	0	0	1	42	yes
adlib_Sample_3893_AT_7	CAGCCAGAGTATAGAC-1	adlib	ad_libitum_fed	Singlet	neuron	magnaclass1	0	0	0	0	0	0	0	0	0	0	0	0		0	0	1	86	86	1	20	0	0	0	0	yes
adlib_Sample_3893_AT_7	CAGCCAGCACCACATA-1	adlib	ad_libitum_fed	Singlet	neuron	magnaclass2	0	0	0	0	0	0	0	0	0	0	1	0		1	30	0	0	0	0	0	1	9	0	0	yes
adlib_Sample_3893_AT_7	CAGCCAGCAGCACGAA-1	adlib	ad_libitum_fed	Singlet	neuron	magnaclass1	0	0	0	0	0	0	0	0	0	0	0	0		0	0	1	0	89	1	91	0	0	1	58	yes
adlib_Sample_3893_AT_7	CAGCCAGGTAGCTTAC-1	adlib	ad_libitum_fed	Singlet	neuron	magnaclass2	0	0	0	0	0	0	0	0	0	0	0	0		0	0	0	0	0	0	0	0	0	0	0	no
adlib_Sample_3893_AT_7	CAGCCAGTCCGCACTT-1	adlib	ad_libitum_fed	Singlet	neuron	magnaclass2	0	0	0	0	0	0	0	0	0	0	0	0		0	0	0	0	0	0	0	0	0	0	0	no
adlib_Sample_3893_AT_7	CAGCGTGAGACGCCCT-1	adlib	ad_libitum_fed	Singlet	neuron	Lrmda_class	0	0	0	0	0	0	0	0	0	0	1	0		1	59	1	68	33	1	33	0	0	0	0	yes
adlib_Sample_3893_AT_7	CAGCGTGAGCCAGTAG-1	adlib	ad_libitum_fed	Singlet	neuron	magnaclass1	0	0	0	0	0	0	0	0	0	0	1	0		1	87	1	76	91	0	0	0	0	0	0	yes
adlib_Sample_3893_AT_7	CAGCGTGCAAGTGGAC-1	adlib	ad_libitum_fed	Singlet	neuron	Lhx2_class	0	0	1	51	0	0	0	0	0	0	1	0		1	67	0	0	0	0	0	0	0	0	0	yes
adlib_Sample_3893_AT_7	CAGCGTGGTGTTCGAT-1	adlib	ad_libitum_fed	Singlet	neuron	monoamine_class	0	0	0	0	0	0	0	0	0	0	1	0		1	94	0	0	0	0	0	1	88	0	0	yes
adlib_Sample_3893_AT_7	CAGCGTGGTTGGACCC-1	adlib	ad_libitum_fed	Singlet	neuron	Sall3_class	0	0	0	0	0	0	0	0	0	0	0	0		0	0	1	0	20	1	94	0	0	0	0	yes
adlib_Sample_3893_AT_7	CAGGCCAAGAGAGGGC-1	adlib	ad_libitum_fed	Singlet	neuron	Sall3_class	0	0	0	0	0	0	0	0	0	0	1	0		1	49	1	38	0	0	0	0	0	0	0	yes
adlib_Sample_3893_AT_7	CAGGCCAAGGGACCAT-1	adlib	ad_libitum_fed	Singlet	neuron	magnaclass1	0	0	0	0	0	0	0	0	0	0	1	0		1	46	1	0	58	1	81	0	0	1	44	yes
adlib_Sample_3893_AT_7	CAGGCCAAGGGATCTG-1	adlib	ad_libitum_fed	Singlet	neuron	magnaclass2	0	0	0	0	0	0	0	0	0	0	1	0		1	97	0	0	0	0	0	0	0	0	0	no
adlib_Sample_3893_AT_7	CAGGCCAAGTCGCTAT-1	adlib	ad_libitum_fed	Singlet	neuron	magnaclass2	0	0	0	0	1	26	0	0	0	0	1	0		1	67	0	0	0	0	0	0	0	1	13	yes
adlib_Sample_3893_AT_7	CAGGCCAAGTCTAGCT-1	adlib	ad_libitum_fed	Singlet	neuron	magnaclass1	0	0	0	0	0	0	0	0	0	0	1	0		1	86	0	0	0	1	92	0	0	0	0	yes
adlib_Sample_3893_AT_7	CAGGCCAAGTCTGCGC-1	adlib	ad_libitum_fed	Singlet	neuron	Sall3_class	0	0	0	0	0	0	0	0	0	0	1	0		1	83	1	71	88	0	0	0	0	0	0	yes
adlib_Sample_3893_AT_7	CAGGCCACAGGCAATG-1	adlib	ad_libitum_fed	Singlet	neuron	magnaclass1	0	0	0	0	0	0	0	0	0	0	0	0		0	0	1	99	55	1	97	0	0	0	0	yes
adlib_Sample_3893_AT_7	CAGGCCAGTAGCGTTT-1	adlib	ad_libitum_fed	Singlet	neuron	magnaclass1	0	0	0	0	0	0	1	64	0	0	0	0		0	0	1	59	78	1	45	0	0	0	0	yes
adlib_Sample_3893_AT_7	CAGGGCTCACAGCTGC-1	adlib	ad_libitum_fed	Singlet	neuron	magnaclass2	0	0	0	0	0	0	0	0	0	0	1	0		1	68	1	0	41	0	0	0	0	0	0	yes
adlib_Sample_3893_AT_7	CAGGGCTGTCGTGTTA-1	adlib	ad_libitum_fed	Singlet	neuron	magnaclass2	0	0	0	0	0	0	0	0	0	0	0	0		0	0	0	0	0	0	0	0	0	0	0	no
adlib_Sample_3893_AT_7	CAGGGCTGTGCATACT-1	adlib	ad_libitum_fed	Singlet	neuron	magnaclass1	0	0	0	0	0	0	0	0	1	78	0	0		0	0	1	98	0	0	0	0	0	0	0	yes
adlib_Sample_3893_AT_7	CAGGGCTTCGATACAC-1	adlib	ad_libitum_fed	Singlet	neuron	magnaclass2	0	0	0	0	0	0	0	0	0	0	0	0		0	0	0	0	0	0	0	0	0	0	0	no
adlib_Sample_3893_AT_7	CAGGTATAGACTTCGT-1	adlib	ad_libitum_fed	Singlet	neuron	magnaclass2	0	0	0	0	0	0	0	0	0	0	0	0		0	0	0	0	0	0	0	0	0	0	0	no
adlib_Sample_3893_AT_7	CAGGTATCATATCGGT-1	adlib	ad_libitum_fed	Singlet	neuron	magnaclass1	0	0	0	0	0	0	0	0	0	0	0	0		0	0	1	56	41	0	0	0	0	0	0	no
adlib_Sample_3893_AT_7	CAGGTATGTCAAGGCA-1	adlib	ad_libitum_fed	Singlet	neuron	magnaclass2	0	0	0	0	0	0	0	0	0	0	1	0		1	82	0	0	0	0	0	1	75	0	0	yes
adlib_Sample_3893_AT_7	CAGGTATGTTCGGCGT-1	adlib	ad_libitum_fed	Singlet	neuron	magnaclass2	0	0	0	0	0	0	0	0	0	0	1	0		1	46	0	0	0	0	0	1	94	1	44	yes
adlib_Sample_3893_AT_7	CAGGTATGTTGACGGA-1	adlib	ad_libitum_fed	Singlet	neuron	magnaclass1	0	0	0	0	0	0	0	0	0	0	0	0		0	0	1	0	96	0	0	1	65	0	0	yes
adlib_Sample_3893_AT_7	CAGTGCGTCCGTGCGA-1	adlib	ad_libitum_fed	Singlet	neuron	magnaclass1	0	0	0	0	0	0	0	0	0	0	0	0		0	0	1	0	79	0	0	0	0	0	0	no
adlib_Sample_3893_AT_7	CAGTGCGTCCTGTTAT-1	adlib	ad_libitum_fed	Singlet	neuron	magnaclass2	0	0	0	0	0	0	0	0	0	0	0	0		0	0	0	0	0	1	52	0	0	0	0	no
adlib_Sample_3893_AT_7	CAGTTAGAGGTCACCC-1	adlib	ad_libitum_fed	Singlet	neuron	Sall3_class	0	0	0	0	0	0	0	0	0	0	1	0		1	97	0	0	0	1	54	0	0	1	71	yes
adlib_Sample_3893_AT_7	CAGTTAGCATAAGATG-1	adlib	ad_libitum_fed	Singlet	neuron	magnaclass1	0	0	0	0	0	0	0	0	0	0	1	0		1	84	1	99	0	1	60	0	0	1	75	yes
adlib_Sample_3893_AT_7	CAGTTAGTCATCGTAG-1	adlib	ad_libitum_fed	Singlet	neuron	magnaclass1	0	0	0	0	0	0	0	0	0	0	1	0		1	53	1	41	30	0	0	0	0	0	0	yes
adlib_Sample_3893_AT_7	CAGTTCCAGGTCGAGT-1	adlib	ad_libitum_fed	Singlet	neuron	magnaclass2	0	0	0	0	0	0	0	0	0	0	0	0		0	0	0	0	0	0	0	0	0	0	0	no
adlib_Sample_3893_AT_7	CAGTTCCCAGAGAATT-1	adlib	ad_libitum_fed	Singlet	neuron	Sall3_class	0	0	0	0	0	0	0	0	0	0	0	0		0	0	1	0	26	1	5	1	67	1	76	yes
adlib_Sample_3893_AT_7	CAGTTCCGTACTAGCT-1	adlib	ad_libitum_fed	Singlet	neuron	magnaclass2	0	0	0	0	0	0	0	0	0	0	0	0		0	0	0	0	0	0	0	1	25	0	0	no
adlib_Sample_3893_AT_7	CAGTTCCGTCATACCA-1	adlib	ad_libitum_fed	Singlet	neuron	Lrmda_class	0	0	0	0	0	0	0	0	0	0	1	0		1	55	0	0	0	0	0	0	0	0	0	no
adlib_Sample_3893_AT_7	CATAAGCAGCCTCACG-1	adlib	ad_libitum_fed	Singlet	neuron	Lhx2_class	0	0	0	0	0	0	0	0	0	0	1	0		1	72	0	0	0	1	14	0	0	0	0	yes
adlib_Sample_3893_AT_7	CATAAGCCATGCAGGA-1	adlib	ad_libitum_fed	Singlet	neuron	monoamine_class	0	0	0	0	0	0	0	0	0	0	0	0		0	0	0	0	0	0	0	0	0	0	0	no
adlib_Sample_3893_AT_7	CATAAGCGTGTCTTAG-1	adlib	ad_libitum_fed	Singlet	neuron	magnaclass1	0	0	0	0	0	0	0	0	0	0	1	0		1	99	1	41	29	0	0	0	0	0	0	yes
adlib_Sample_3893_AT_7	CATAAGCGTGTGGTCC-1	adlib	ad_libitum_fed	Singlet	neuron	magnaclass2	0	0	0	0	0	0	0	0	0	0	1	0		1	74	0	0	0	0	0	0	0	0	0	no
adlib_Sample_3893_AT_7	CATAAGCGTTAGAGAT-1	adlib	ad_libitum_fed	Singlet	neuron	Lhx2_class	0	0	0	0	0	0	0	0	0	0	0	0		0	0	0	0	0	0	0	0	0	0	0	no
adlib_Sample_3893_AT_7	CATAAGCTCATTGCCC-1	adlib	ad_libitum_fed	Singlet	neuron	Lrmda_class	0	0	0	0	0	0	0	0	0	0	1	0		1	51	0	0	0	1	99	1	69	0	0	yes
adlib_Sample_3893_AT_7	CATACAGAGTACGAGC-1	adlib	ad_libitum_fed	Singlet	neuron	Lrmda_class	0	0	0	0	0	0	0	0	0	0	0	0		0	0	1	0	39	1	78	0	0	0	0	yes
adlib_Sample_3893_AT_7	CATACAGCAAAGCTCT-1	adlib	ad_libitum_fed	Singlet	neuron	monoamine_class	0	0	0	0	0	0	0	0	0	0	1	0		1	83	0	0	0	0	0	1	88	0	0	yes
adlib_Sample_3893_AT_7	CATACAGCATCCTTGC-1	adlib	ad_libitum_fed	Singlet	neuron	Sall3_class	0	0	0	0	0	0	0	0	0	0	0	0		0	0	1	13	31	1	7	1	72	0	0	yes
adlib_Sample_3893_AT_7	CATACAGTCCGAAGGA-1	adlib	ad_libitum_fed	Singlet	neuron	Lhx2_class	0	0	0	0	0	0	0	0	0	0	1	0		1	79	0	0	0	0	0	0	0	0	0	no
adlib_Sample_3893_AT_7	CATACCCAGCACCAGA-1	adlib	ad_libitum_fed	Singlet	neuron	Lhx2_class	0	0	0	0	0	0	0	0	0	0	0	0		0	0	1	0	6	0	0	0	0	0	0	no
adlib_Sample_3893_AT_7	CATACCCAGCGAACTG-1	adlib	ad_libitum_fed	Singlet	neuron	magnaclass1	0	0	0	0	0	0	0	0	0	0	1	0		1	10	1	35	58	1	34	0	0	0	0	yes
adlib_Sample_3893_AT_7	CATACCCAGGAAGTGA-1	adlib	ad_libitum_fed	Singlet	neuron	magnaclass1	0	0	0	0	0	0	0	0	0	0	0	0		0	0	0	0	0	1	70	0	0	0	0	no
adlib_Sample_3893_AT_7	CATACCCGTTGGACCC-1	adlib	ad_libitum_fed	Singlet	neuron	magnaclass2	0	0	0	0	1	44	0	0	0	0	0	0		0	0	0	0	0	0	0	0	0	0	0	no
adlib_Sample_3893_AT_7	CATACTTAGACTTCCA-1	adlib	ad_libitum_fed	Singlet	neuron	magnaclass1	0	0	0	0	1	66	0	0	0	0	1	0		1	47	1	0	59	0	0	0	0	0	0	yes
adlib_Sample_3893_AT_7	CATACTTCACTGTGTA-1	adlib	ad_libitum_fed	Singlet	neuron	magnaclass2	0	0	0	0	0	0	0	0	0	0	1	0		1	75	0	0	0	0	0	0	0	0	0	no
adlib_Sample_3893_AT_7	CATACTTCATCAGTCA-1	adlib	ad_libitum_fed	Singlet	neuron	magnaclass2	0	0	0	0	0	0	0	0	0	0	1	0		1	73	0	0	0	0	0	0	0	0	0	no
adlib_Sample_3893_AT_7	CATACTTGTGAGCCAA-1	adlib	ad_libitum_fed	Singlet	neuron	Lrmda_class	0	0	0	0	0	0	0	0	0	0	1	0		1	33	1	0	48	1	16	0	0	0	0	yes
adlib_Sample_3893_AT_7	CATAGACAGTGATCGG-1	adlib	ad_libitum_fed	Singlet	neuron	magnaclass1	0	0	1	55	0	0	0	0	0	0	1	0		1	72	1	59	0	0	0	0	0	0	0	yes
adlib_Sample_3893_AT_7	CATAGACCACGTACTA-1	adlib	ad_libitum_fed	Singlet	neuron	magnaclass2	0	0	0	0	0	0	0	0	0	0	0	0		0	0	0	0	0	0	0	0	0	0	0	no
adlib_Sample_3893_AT_7	CATAGACGTTATTCTC-1	adlib	ad_libitum_fed	Singlet	neuron	magnaclass2	0	0	0	0	0	0	0	0	0	0	1	0		1	37	0	0	0	0	0	0	0	1	37	yes
adlib_Sample_3893_AT_7	CATCAAGAGAAATTGC-1	adlib	ad_libitum_fed	Singlet	neuron	magnaclass1	0	0	0	0	0	0	0	0	0	0	1	0		1	71	1	0	44	0	0	0	0	0	0	yes
adlib_Sample_3893_AT_7	CATCAAGAGCCTATCA-1	adlib	ad_libitum_fed	Singlet	neuron	magnaclass1	0	0	0	0	0	0	0	0	0	0	0	0		0	0	1	0	57	0	0	0	0	1	74	yes
adlib_Sample_3893_AT_7	CATCAAGAGCTACAAA-1	adlib	ad_libitum_fed	Singlet	neuron	magnaclass2	0	0	0	0	1	85	0	0	0	0	1	0		1	35	0	0	0	0	0	0	0	0	0	yes
adlib_Sample_3893_AT_7	CATCAAGAGGCTTAGG-1	adlib	ad_libitum_fed	Singlet	neuron	magnaclass1	0	0	0	0	0	0	0	0	0	0	0	0		0	0	1	76	0	0	0	0	0	0	0	no
adlib_Sample_3893_AT_7	CATCAAGGTGCTGCAC-1	adlib	ad_libitum_fed	Singlet	neuron	magnaclass1	0	0	0	0	0	0	0	0	0	0	0	0		0	0	1	0	33	1	33	0	0	0	0	yes
adlib_Sample_3893_AT_7	CATCAAGTCATGCAGT-1	adlib	ad_libitum_fed	Singlet	neuron	magnaclass1	0	0	0	0	0	0	0	0	0	0	0	0		0	0	1	39	0	1	65	0	0	0	0	yes
adlib_Sample_3893_AT_7	CATCAAGTCCCGTAAA-1	adlib	ad_libitum_fed	Singlet	neuron	magnaclass1	0	0	0	0	0	0	0	0	0	0	0	0		0	0	0	0	0	0	0	0	0	0	0	no
adlib_Sample_3893_AT_7	CATCCACAGCTGAGTG-1	adlib	ad_libitum_fed	Singlet	neuron	Lrmda_class	0	0	1	55	0	0	0	0	0	0	1	0		1	89	1	0	64	1	82	1	96	0	0	yes
adlib_Sample_3893_AT_7	CATCCACAGTATCTGC-1	adlib	ad_libitum_fed	Singlet	neuron	magnaclass2	0	0	0	0	0	0	0	0	0	0	0	0		0	0	0	0	0	0	0	0	0	0	0	no
adlib_Sample_3893_AT_7	CATCCACCATGGCTGC-1	adlib	ad_libitum_fed	Singlet	neuron	monoamine_class	0	0	0	0	0	0	0	0	0	0	1	0		1	90	0	0	0	0	0	0	0	0	0	no
adlib_Sample_3893_AT_7	CATCCACGTTTAGACC-1	adlib	ad_libitum_fed	Singlet	neuron	Lhx2_class	0	0	0	0	0	0	0	0	0	0	0	0		0	0	0	0	0	0	0	0	0	0	0	no
adlib_Sample_3893_AT_7	CATCCACTCTAATTCC-1	adlib	ad_libitum_fed	Singlet	neuron	magnaclass1	0	0	0	0	0	0	0	0	0	0	1	0		1	74	1	61	66	1	15	0	0	0	0	yes
adlib_Sample_3893_AT_7	CATCCACTCTCGTCAC-1	adlib	ad_libitum_fed	Singlet	neuron	magnaclass2	0	0	0	0	0	0	0	0	0	0	1	0		1	65	1	0	38	0	0	0	0	0	0	yes
adlib_Sample_3893_AT_7	CATCCCAAGTCATGAA-1	adlib	ad_libitum_fed	Singlet	neuron	Lhx2_class	0	0	0	0	0	0	0	0	0	0	0	0		0	0	0	0	0	0	0	0	0	1	49	no
adlib_Sample_3893_AT_7	CATCCCACAACCAACT-1	adlib	ad_libitum_fed	Singlet	neuron	Lhx2_class	0	0	0	0	0	0	0	0	0	0	1	0		1	38	0	0	0	0	0	0	0	0	0	no
adlib_Sample_3893_AT_7	CATCCGTAGGAAAGGT-1	adlib	ad_libitum_fed	Singlet	neuron	magnaclass1	0	0	0	0	0	0	0	0	0	0	1	0		1	50	1	39	91	0	0	0	0	1	77	yes
adlib_Sample_3893_AT_7	CATCCGTCAACAAGAT-1	adlib	ad_libitum_fed	Singlet	neuron	magnaclass1	0	0	0	0	0	0	0	0	0	0	0	0		0	0	1	66	84	0	0	0	0	0	0	no
adlib_Sample_3893_AT_7	CATCCGTCACCGGCTA-1	adlib	ad_libitum_fed	Singlet	neuron	Lhx2_class	0	0	0	0	0	0	0	0	0	0	1	0		1	26	0	0	0	0	0	0	0	0	0	no
adlib_Sample_3893_AT_7	CATCCGTCACTAGGTT-1	adlib	ad_libitum_fed	Singlet	neuron	monoamine_class	1	65	0	0	0	0	0	0	0	0	1	0		1	67	0	0	0	0	0	0	0	0	0	yes
adlib_Sample_3893_AT_7	CATCCGTTCATTCGGA-1	adlib	ad_libitum_fed	Singlet	neuron	magnaclass2	0	0	0	0	0	0	0	0	0	0	0	0		0	0	0	0	0	0	0	0	0	0	0	no
adlib_Sample_3893_AT_7	CATCCGTTCTGCATAG-1	adlib	ad_libitum_fed	Singlet	neuron	Sall3_class	0	0	0	0	0	0	0	0	0	0	0	0		0	0	1	6	4	1	17	1	11	1	10	yes
adlib_Sample_3893_AT_7	CATCGCTCAGTTTGGT-1	adlib	ad_libitum_fed	Singlet	neuron	monoamine_class	0	0	0	0	0	0	1	37	0	0	0	0		0	0	0	0	0	0	0	0	0	0	0	no
adlib_Sample_3893_AT_7	CATCGCTGTCATCGGC-1	adlib	ad_libitum_fed	Singlet	neuron	magnaclass2	0	0	0	0	0	0	0	0	0	0	1	0		1	47	0	0	0	0	0	0	0	0	0	no
adlib_Sample_3893_AT_7	CATCGCTGTTTGGAGG-1	adlib	ad_libitum_fed	Singlet	neuron	Sall3_class	0	0	0	0	0	0	0	0	0	0	0	0		0	0	0	0	0	0	0	0	0	0	0	no
adlib_Sample_3893_AT_7	CATCGCTTCAGCAATC-1	adlib	ad_libitum_fed	Singlet	neuron	magnaclass2	0	0	0	0	0	0	0	0	0	0	0	0		0	0	0	0	0	0	0	0	0	0	0	no
adlib_Sample_3893_AT_7	CATCGCTTCGAACCAT-1	adlib	ad_libitum_fed	Singlet	neuron	magnaclass1	0	0	0	0	0	0	0	0	0	0	0	0		0	0	1	0	67	1	7	0	0	0	0	yes
adlib_Sample_3893_AT_7	CATCGGGCAATCCAGT-1	adlib	ad_libitum_fed	Singlet	neuron	monoamine_class	0	0	1	30	0	0	0	0	0	0	0	0		0	0	0	0	0	0	0	0	0	0	0	no
adlib_Sample_3893_AT_7	CATCGGGCACTGAATC-1	adlib	ad_libitum_fed	Singlet	neuron	Lhx2_class	0	0	0	0	0	0	0	0	0	0	0	0		0	0	0	0	0	0	0	0	0	0	0	no
adlib_Sample_3893_AT_7	CATCGGGCACTTCATT-1	adlib	ad_libitum_fed	Singlet	neuron	magnaclass1	0	0	0	0	0	0	0	0	0	0	0	0		0	0	0	0	0	1	75	0	0	0	0	no
adlib_Sample_3893_AT_7	CATCGGGCATGTTCGA-1	adlib	ad_libitum_fed	Singlet	neuron	magnaclass1	0	0	0	0	0	0	0	0	0	0	0	0		0	0	1	0	31	0	0	0	0	1	80	yes
adlib_Sample_3893_AT_7	CATCGGGTCATTGCTT-1	adlib	ad_libitum_fed	Singlet	neuron	Lhx2_class	0	0	0	0	0	0	0	0	0	0	0	0		0	0	0	0	0	1	11	0	0	0	0	no
adlib_Sample_3893_AT_7	CATCGGGTCTCGTCGT-1	adlib	ad_libitum_fed	Singlet	neuron	corelautus_class	0	0	0	0	0	0	0	0	0	0	0	0		0	0	0	0	0	0	0	0	0	0	0	no
adlib_Sample_3893_AT_7	CATCGTCAGGCCTTCG-1	adlib	ad_libitum_fed	Singlet	neuron	Lrmda_class	0	0	1	3	0	0	0	0	0	0	1	0		1	2	1	0	32	1	63	0	0	0	0	yes
adlib_Sample_3893_AT_7	CATCGTCCAACAGAGC-1	adlib	ad_libitum_fed	Singlet	neuron	magnaclass1	0	0	0	0	0	0	0	0	0	0	1	0		1	93	0	0	0	1	97	0	0	0	0	yes
adlib_Sample_3893_AT_7	CATCGTCCACTGTTCC-1	adlib	ad_libitum_fed	Singlet	neuron	magnaclass1	0	0	0	0	0	0	0	0	0	0	1	0		1	74	1	11	0	0	0	0	0	0	0	yes
adlib_Sample_3893_AT_7	CATCGTCGTCGCATTA-1	adlib	ad_libitum_fed	Singlet	neuron	Lhx2_class	0	0	0	0	0	0	0	0	0	0	0	0		0	0	0	0	0	0	0	0	0	0	0	no
adlib_Sample_3893_AT_7	CATCGTCGTGACAACG-1	adlib	ad_libitum_fed	Singlet	neuron	pH_class	0	0	0	0	0	0	0	0	0	0	1	0		1	75	1	0	81	0	0	0	0	0	0	yes
adlib_Sample_3893_AT_7	CATCGTCGTGTAAATG-1	adlib	ad_libitum_fed	Singlet	neuron	magnaclass1	0	0	0	0	0	0	0	0	0	0	1	0		1	99	0	0	0	0	0	0	0	0	0	no
adlib_Sample_3893_AT_7	CATCGTCGTTGGCCTG-1	adlib	ad_libitum_fed	Singlet	neuron	magnaclass2	0	0	0	0	1	69	0	0	0	0	0	0		0	0	0	0	0	0	0	0	0	1	48	yes
adlib_Sample_3893_AT_7	CATCGTCTCAGTCACA-1	adlib	ad_libitum_fed	Singlet	neuron	monoamine_class	1	27	1	92	0	0	1	60	0	0	0	0		0	0	0	0	0	0	0	0	0	0	0	no
adlib_Sample_3893_AT_7	CATGAGTAGATAGGGA-1	adlib	ad_libitum_fed	Singlet	neuron	magnaclass2	0	0	0	0	0	0	0	0	0	0	1	0		1	63	0	0	0	0	0	0	0	0	0	no
adlib_Sample_3893_AT_7	CATGAGTCATTACGGT-1	adlib	ad_libitum_fed	Singlet	neuron	magnaclass2	0	0	1	70	0	0	0	0	0	0	1	0		1	53	0	0	0	0	0	0	0	0	0	yes
adlib_Sample_3893_AT_7	CATGAGTGTCCGGCAT-1	adlib	ad_libitum_fed	Singlet	neuron	monoamine_class	0	0	1	36	0	0	0	0	0	0	0	0		0	0	1	0	77	0	0	0	0	0	0	yes
adlib_Sample_3893_AT_7	CATGAGTTCAGTCACA-1	adlib	ad_libitum_fed	Singlet	neuron	magnaclass1	0	0	0	0	1	80	0	0	0	0	1	0		1	87	1	0	62	0	0	0	0	0	0	yes
adlib_Sample_3893_AT_7	CATGAGTTCATACAGC-1	adlib	ad_libitum_fed	Singlet	neuron	monoamine_class	0	0	0	0	0	0	0	0	0	0	1	0		1	97	0	0	0	0	0	0	0	1	99	yes
adlib_Sample_3893_AT_7	CATGAGTTCCATGAGT-1	adlib	ad_libitum_fed	Singlet	neuron	magnaclass1	0	0	0	0	0	0	0	0	0	0	0	0		0	0	1	77	0	0	0	0	0	0	0	no
adlib_Sample_3893_AT_7	CATGAGTTCTCCCATG-1	adlib	ad_libitum_fed	Singlet	neuron	corelautus_class	0	0	0	0	0	0	0	0	0	0	0	0		0	0	0	0	0	0	0	0	0	0	0	no
adlib_Sample_3893_AT_7	CATGAGTTCTGATGGT-1	adlib	ad_libitum_fed	Singlet	neuron	monoamine_class	0	0	0	0	0	0	0	0	0	0	0	0		0	0	0	0	0	0	0	0	0	0	0	no
adlib_Sample_3893_AT_7	CATGCCTAGCAAGCCA-1	adlib	ad_libitum_fed	Singlet	neuron	Lhx2_class	0	0	0	0	0	0	0	0	0	0	1	0		1	34	0	0	0	1	1	0	0	0	0	yes
adlib_Sample_3893_AT_7	CATGCCTAGGGAGTGG-1	adlib	ad_libitum_fed	Singlet	neuron	magnaclass1	0	0	0	0	0	0	0	0	0	0	1	0		1	67	1	86	40	0	0	0	0	0	0	yes
adlib_Sample_3893_AT_7	CATGCCTCAGCACCCA-1	adlib	ad_libitum_fed	Singlet	neuron	Sall3_class	0	0	0	0	0	0	0	0	0	0	0	0		0	0	1	0	6	0	0	0	0	0	0	no
adlib_Sample_3893_AT_7	CATGCCTGTAAGATTG-1	adlib	ad_libitum_fed	Singlet	neuron	magnaclass2	0	0	0	0	0	0	0	0	0	0	1	0		1	40	0	0	0	0	0	0	0	0	0	no
adlib_Sample_3893_AT_7	CATGCCTTCACTTCTA-1	adlib	ad_libitum_fed	Singlet	neuron	magnaclass2	0	0	0	0	0	0	0	0	0	0	0	0		0	0	0	0	0	0	0	0	0	1	51	no
adlib_Sample_3893_AT_7	CATGCCTTCGGCAGTC-1	adlib	ad_libitum_fed	Singlet	neuron	magnaclass2	0	0	0	0	0	0	0	0	0	0	0	0		0	0	0	0	0	0	0	0	0	0	0	no
adlib_Sample_3893_AT_7	CATGCGGAGAAAGTCT-1	adlib	ad_libitum_fed	Singlet	neuron	monoamine_class	0	0	1	82	0	0	1	31	0	0	0	0		0	0	0	0	0	0	0	0	0	0	0	no
adlib_Sample_3893_AT_7	CATGCGGCAATGTGGG-1	adlib	ad_libitum_fed	Singlet	neuron	Lrmda_class	0	0	0	0	1	84	0	0	0	0	1	0		1	75	1	97	0	0	0	0	0	0	0	yes
adlib_Sample_3893_AT_7	CATGCGGCAGCCTATA-1	adlib	ad_libitum_fed	Singlet	neuron	Lrmda_class	0	0	0	0	0	0	0	0	0	0	0	0		0	0	1	0	61	1	88	0	0	1	61	yes
adlib_Sample_3893_AT_7	CATGCGGCATCGCTCT-1	adlib	ad_libitum_fed	Singlet	neuron	magnaclass2	0	0	0	0	0	0	0	0	0	0	0	0		0	0	0	0	0	0	0	0	0	0	0	no
adlib_Sample_3893_AT_7	CATGCGGGTTTCCCAC-1	adlib	ad_libitum_fed	Singlet	neuron	magnaclass2	0	0	0	0	1	74	0	0	0	0	0	0		0	0	1	0	67	0	0	0	0	0	0	yes
adlib_Sample_3893_AT_7	CATGCTCAGCATAGGC-1	adlib	ad_libitum_fed	Singlet	neuron	Sall3_class	0	0	0	0	0	0	0	0	0	0	0	0		0	0	0	0	0	0	0	0	0	0	0	no
adlib_Sample_3893_AT_7	CATGCTCCAGCTGCCA-1	adlib	ad_libitum_fed	Singlet	neuron	Lhx2_class	0	0	0	0	0	0	0	0	0	0	1	0		1	26	0	0	0	0	0	0	0	1	48	yes
adlib_Sample_3893_AT_7	CATGGATAGCGGACAT-1	adlib	ad_libitum_fed	Singlet	neuron	Golli_class	0	0	0	0	0	0	0	0	0	0	0	0		0	0	1	0	45	1	46	0	0	0	0	yes
adlib_Sample_3893_AT_7	CATGGATTCTTCGTGC-1	adlib	ad_libitum_fed	Singlet	neuron	magnaclass2	0	0	0	0	0	0	0	0	0	0	0	0		0	0	0	0	0	0	0	0	0	0	0	no
adlib_Sample_3893_AT_7	CATGGTACAATTCACG-1	adlib	ad_libitum_fed	Singlet	neuron	magnaclass2	0	0	0	0	0	0	0	0	1	45	0	0		0	0	1	0	16	0	0	0	0	0	0	yes
adlib_Sample_3893_AT_7	CATGGTACAGAAGCTG-1	adlib	ad_libitum_fed	Singlet	neuron	magnaclass1	0	0	0	0	0	0	0	0	0	0	0	0		0	0	1	0	77	0	0	1	88	0	0	yes
adlib_Sample_3893_AT_7	CATGGTAGTTCATCTT-1	adlib	ad_libitum_fed	Singlet	neuron	magnaclass1	0	0	0	0	0	0	0	0	0	0	1	0		1	34	1	26	0	1	50	0	0	0	0	yes
adlib_Sample_3893_AT_7	CATGGTATCTTACGGA-1	adlib	ad_libitum_fed	Singlet	neuron	magnaclass2	0	0	0	0	0	0	0	0	0	0	0	0		0	0	0	0	0	0	0	0	0	0	0	no
adlib_Sample_3893_AT_7	CATTCATAGACTCCGC-1	adlib	ad_libitum_fed	Singlet	neuron	monoamine_class	0	0	1	81	0	0	0	0	0	0	0	0		0	0	0	0	0	0	0	0	0	0	0	no
adlib_Sample_3893_AT_7	CATTCATAGTCGTTAC-1	adlib	ad_libitum_fed	Singlet	neuron	Lhx2_class	0	0	0	0	1	57	0	0	0	0	1	0		1	36	1	28	0	0	0	0	0	0	0	yes
adlib_Sample_3893_AT_7	CATTCATCAGAGGCAT-1	adlib	ad_libitum_fed	Singlet	neuron	monoamine_class	0	0	0	0	0	0	1	77	0	0	0	0		0	0	0	0	0	0	0	0	0	0	0	no
adlib_Sample_3893_AT_7	CATTCATCAGCAGTAG-1	adlib	ad_libitum_fed	Singlet	neuron	magnaclass1	0	0	0	0	0	0	0	0	0	0	0	0		0	0	1	19	40	1	40	0	0	0	0	yes
adlib_Sample_3893_AT_7	CATTCATTCGGCCAAC-1	adlib	ad_libitum_fed	Singlet	neuron	magnaclass2	0	0	0	0	0	0	0	0	0	0	0	0		0	0	0	0	0	0	0	0	0	0	0	no
adlib_Sample_3893_AT_7	CATTCCGAGAGCTGAC-1	adlib	ad_libitum_fed	Singlet	neuron	magnaclass1	0	0	0	0	0	0	0	0	0	0	1	0		1	56	1	44	31	0	0	1	55	0	0	yes
adlib_Sample_3893_AT_7	CATTCCGCAAGCTGTT-1	adlib	ad_libitum_fed	Singlet	neuron	Golli_class	0	0	0	0	0	0	0	0	0	0	1	0		1	62	0	0	0	0	0	0	0	0	0	no
adlib_Sample_3893_AT_7	CATTCCGTCACTGATG-1	adlib	ad_libitum_fed	Singlet	neuron	magnaclass1	0	0	0	0	0	0	0	0	0	0	0	0		0	0	1	0	30	1	30	0	0	0	0	yes
adlib_Sample_3893_AT_7	CATTCTAAGACATCCT-1	adlib	ad_libitum_fed	Singlet	neuron	monoamine_class	0	0	1	45	0	0	0	0	0	0	0	0		0	0	0	0	0	0	0	0	0	0	0	no
adlib_Sample_3893_AT_7	CATTCTACACGGTAGA-1	adlib	ad_libitum_fed	Singlet	neuron	magnaclass2	0	0	0	0	0	0	0	0	0	0	0	0		0	0	0	0	0	1	78	0	0	1	85	yes
adlib_Sample_3893_AT_7	CATTCTAGTGTGTCGC-1	adlib	ad_libitum_fed	Singlet	neuron	magnaclass1	0	0	0	0	0	0	0	0	0	0	0	0		0	0	0	0	0	0	0	0	0	0	0	no
adlib_Sample_3893_AT_7	CATTCTAGTTTCACAG-1	adlib	ad_libitum_fed	Singlet	neuron	magnaclass1	0	0	0	0	0	0	0	0	0	0	1	0		1	21	1	16	71	0	0	0	0	0	0	yes
adlib_Sample_3893_AT_7	CATTCTATCAAAGACA-1	adlib	ad_libitum_fed	Singlet	neuron	magnaclass2	0	0	0	0	0	0	0	0	0	0	0	0		0	0	0	0	0	0	0	0	0	0	0	no
adlib_Sample_3893_AT_7	CATTCTATCTGCTCTG-1	adlib	ad_libitum_fed	Singlet	neuron	magnaclass2	0	0	0	0	0	0	0	0	0	0	1	0		1	36	0	0	0	0	0	0	0	0	0	no
adlib_Sample_3893_AT_7	CATTCTATCTGGTGGC-1	adlib	ad_libitum_fed	Singlet	neuron	Lrmda_class	0	0	0	0	0	0	0	0	0	0	0	0		0	0	1	8	39	1	21	0	0	0	0	yes
adlib_Sample_3893_AT_7	CATTGAGAGAGAGGGC-1	adlib	ad_libitum_fed	Singlet	neuron	magnaclass2	0	0	0	0	0	0	0	0	0	0	1	0		1	69	1	56	41	1	42	0	0	0	0	yes
adlib_Sample_3893_AT_7	CATTGAGAGAGCTTTC-1	adlib	ad_libitum_fed	Singlet	neuron	Sall3_class	0	0	0	0	0	0	0	0	0	0	0	0		0	0	1	51	0	1	38	0	0	0	0	yes
adlib_Sample_3893_AT_7	CATTGAGAGGAGCTGT-1	adlib	ad_libitum_fed	Singlet	neuron	magnaclass1	0	0	0	0	0	0	0	0	0	0	0	0		0	0	1	95	58	0	0	0	0	0	0	no
adlib_Sample_3893_AT_7	CATTGAGCACAGTGTT-1	adlib	ad_libitum_fed	Singlet	neuron	magnaclass2	0	0	0	0	0	0	0	0	0	0	1	0		1	79	1	0	52	0	0	0	0	0	0	yes
adlib_Sample_3893_AT_7	CATTGAGCAGGTCAAG-1	adlib	ad_libitum_fed	Singlet	neuron	Lrmda_class	0	0	0	0	0	0	0	0	0	0	0	0		0	0	0	0	0	1	84	0	0	0	0	no
adlib_Sample_3893_AT_7	CATTGAGCAGGTGACA-1	adlib	ad_libitum_fed	Singlet	neuron	magnaclass2	0	0	0	0	0	0	0	0	0	0	0	0		0	0	0	0	0	0	0	0	0	0	0	no
adlib_Sample_3893_AT_7	CATTGAGCATCCCACT-1	adlib	ad_libitum_fed	Singlet	neuron	monoamine_class	0	0	1	63	0	0	0	0	0	0	0	0		0	0	0	0	0	0	0	0	0	0	0	no
adlib_Sample_3893_AT_7	CATTGAGTCCCGAACG-1	adlib	ad_libitum_fed	Singlet	neuron	magnaclass2	0	0	0	0	0	0	0	0	0	0	1	0		1	57	0	0	0	0	0	0	0	0	0	no
adlib_Sample_3893_AT_7	CATTGAGTCTCACCCA-1	adlib	ad_libitum_fed	Singlet	neuron	corelautus_class	0	0	0	0	0	0	0	0	0	0	0	0		0	0	0	0	0	0	0	0	0	0	0	no
adlib_Sample_3893_AT_7	CATTGAGTCTGGACCG-1	adlib	ad_libitum_fed	Singlet	neuron	magnaclass2	0	0	0	0	0	0	0	0	0	0	0	0		0	0	0	0	0	0	0	0	0	0	0	no
adlib_Sample_3893_AT_7	CATTGCCAGCACTCCG-1	adlib	ad_libitum_fed	Singlet	neuron	magnaclass1	0	0	0	0	0	0	0	0	0	0	0	0		0	0	1	45	68	1	71	0	0	0	0	yes
adlib_Sample_3893_AT_7	CATTGCCAGGTAGATT-1	adlib	ad_libitum_fed	Singlet	neuron	monoamine_class	0	0	0	0	0	0	0	0	0	0	0	0		0	0	0	0	0	0	0	0	0	0	0	no
adlib_Sample_3893_AT_7	CATTGCCAGTCCTACA-1	adlib	ad_libitum_fed	Singlet	neuron	Lhx2_class	0	0	0	0	0	0	0	0	0	0	0	0		0	0	0	0	0	0	0	1	73	0	0	no
adlib_Sample_3893_AT_7	CATTGCCGTTATCCAG-1	adlib	ad_libitum_fed	Singlet	neuron	Lrmda_class	0	0	0	0	0	0	0	0	0	0	0	0		0	0	1	66	0	1	75	0	0	0	0	yes
adlib_Sample_3893_AT_7	CATTGCCTCGAGAACG-1	adlib	ad_libitum_fed	Singlet	neuron	magnaclass2	0	0	0	0	0	0	0	0	0	0	0	0		0	0	0	0	0	0	0	0	0	0	0	no
adlib_Sample_3893_AT_7	CATTGTTAGCTTTCTT-1	adlib	ad_libitum_fed	Singlet	neuron	monoamine_class	0	0	0	0	0	0	0	0	0	0	1	0		1	70	0	0	0	0	0	1	88	0	0	yes
adlib_Sample_3893_AT_7	CATTGTTAGGCGCTTC-1	adlib	ad_libitum_fed	Singlet	neuron	magnaclass2	0	0	0	0	0	0	0	0	0	0	1	0		1	28	0	0	0	0	0	1	32	0	0	yes
adlib_Sample_3893_AT_7	CATTGTTGTTTGCAGT-1	adlib	ad_libitum_fed	Singlet	neuron	Lrmda_class	0	0	0	0	0	0	0	0	0	0	1	0		1	23	1	36	0	1	51	0	0	0	0	yes
adlib_Sample_3893_AT_7	CATTGTTTCGCACTCT-1	adlib	ad_libitum_fed	Singlet	neuron	Lrmda_class	0	0	0	0	0	0	0	0	0	0	1	0		1	72	1	5	45	1	45	0	0	0	0	yes
adlib_Sample_3893_AT_7	CATTGTTTCGGTGAAG-1	adlib	ad_libitum_fed	Singlet	neuron	magnaclass2	0	0	0	0	0	0	0	0	0	0	1	0		1	60	0	0	0	0	0	1	25	0	0	yes
adlib_Sample_3893_AT_7	CATTTCAAGACAAGCC-1	adlib	ad_libitum_fed	Singlet	neuron	monoamine_class	0	0	0	0	0	0	0	0	0	0	0	0		0	0	0	0	0	1	21	1	43	0	0	yes
adlib_Sample_3893_AT_7	CATTTCACAAGGCCTC-1	adlib	ad_libitum_fed	Singlet	neuron	magnaclass2	0	0	1	84	0	0	0	0	0	0	1	0		1	28	0	0	0	0	0	0	0	0	0	yes
adlib_Sample_3893_AT_7	CATTTCAGTCGACTTA-1	adlib	ad_libitum_fed	Singlet	neuron	Lrmda_class	0	0	0	0	0	0	0	0	0	0	1	0		1	23	1	18	12	1	38	0	0	0	0	yes
adlib_Sample_3893_AT_7	CCAAGCGAGGAGATAG-1	adlib	ad_libitum_fed	Singlet	neuron	Lrmda_class	0	0	0	0	0	0	0	0	0	0	0	0		0	0	1	20	0	1	65	0	0	1	29	yes
adlib_Sample_3893_AT_7	CCAATGAAGCAAATGT-1	adlib	ad_libitum_fed	Singlet	neuron	magnaclass1	0	0	0	0	0	0	0	0	0	0	0	0		0	0	1	96	62	1	66	0	0	0	0	yes
adlib_Sample_3893_AT_7	CCAATGAAGGGCAGGA-1	adlib	ad_libitum_fed	Singlet	neuron	magnaclass2	0	0	0	0	0	0	0	0	0	0	0	0		0	0	0	0	0	0	0	0	0	0	0	no
adlib_Sample_3893_AT_7	CCAATGAAGGTCCAGA-1	adlib	ad_libitum_fed	Singlet	neuron	magnaclass1	0	0	0	0	0	0	0	0	0	0	0	0		0	0	1	79	0	0	0	0	0	0	0	no
adlib_Sample_3893_AT_7	CCAATGAAGGTGCTAG-1	adlib	ad_libitum_fed	Singlet	neuron	magnaclass1	0	0	0	0	0	0	0	0	0	0	0	0		0	0	1	85	0	1	38	0	0	0	0	yes
adlib_Sample_3893_AT_7	CCAATGAAGTACAACA-1	adlib	ad_libitum_fed	Singlet	neuron	Sall3_class	0	0	0	0	0	0	0	0	0	0	1	0		1	56	0	0	0	0	0	0	0	0	0	no
adlib_Sample_3893_AT_7	CCAATGAGTAAGATTG-1	adlib	ad_libitum_fed	Singlet	neuron	magnaclass2	0	0	0	0	0	0	0	0	0	0	1	0		1	92	0	0	0	0	0	0	0	0	0	no
adlib_Sample_3893_AT_7	CCAATGATCACATACG-1	adlib	ad_libitum_fed	Singlet	neuron	Golli_class	0	0	0	0	0	0	0	0	0	0	0	0		0	0	0	0	0	0	0	0	0	0	0	no
adlib_Sample_3893_AT_7	CCAATGATCCCGATCT-1	adlib	ad_libitum_fed	Singlet	neuron	monoamine_class	0	0	0	0	0	0	0	0	0	0	0	0		0	0	0	0	0	0	0	0	0	0	0	no
adlib_Sample_3893_AT_7	CCAATGATCCTACCGT-1	adlib	ad_libitum_fed	Singlet	neuron	magnaclass2	0	0	0	0	0	0	0	0	0	0	0	0		0	0	0	0	0	0	0	0	0	0	0	no
adlib_Sample_3893_AT_7	CCAATGATCGCCGATG-1	adlib	ad_libitum_fed	Singlet	neuron	magnaclass1	0	0	0	0	0	0	0	0	0	0	0	0		0	0	1	36	25	1	25	0	0	0	0	yes
adlib_Sample_3893_AT_7	CCAATTTAGGTTGAGC-1	adlib	ad_libitum_fed	Singlet	neuron	magnaclass2	0	0	0	0	0	0	0	0	0	0	0	0		0	0	0	0	0	0	0	0	0	0	0	no
adlib_Sample_3893_AT_7	CCAATTTAGTTAGTGA-1	adlib	ad_libitum_fed	Singlet	neuron	magnaclass1	0	0	0	0	0	0	0	0	0	0	0	0		0	0	1	30	20	1	54	0	0	0	0	yes
adlib_Sample_3893_AT_7	CCAATTTCAAGACAAT-1	adlib	ad_libitum_fed	Singlet	neuron	magnaclass2	0	0	0	0	0	0	0	0	0	0	1	0		1	49	1	0	46	1	26	0	0	1	16	yes
adlib_Sample_3893_AT_7	CCAATTTCACGACAGA-1	adlib	ad_libitum_fed	Singlet	neuron	Lhx2_class	0	0	0	0	0	0	0	0	0	0	1	0		1	22	0	0	0	0	0	0	0	0	0	no
adlib_Sample_3893_AT_7	CCAATTTGTGCTGTCG-1	adlib	ad_libitum_fed	Singlet	neuron	magnaclass2	0	0	0	0	1	48	0	0	0	0	1	0		1	27	1	0	14	0	0	0	0	0	0	yes
adlib_Sample_3893_AT_7	CCAATTTGTTCGGCTG-1	adlib	ad_libitum_fed	Singlet	neuron	magnaclass2	0	0	0	0	1	30	0	0	0	0	1	0		1	11	1	0	79	0	0	1	67	1	64	yes
adlib_Sample_3893_AT_7	CCAATTTTCAGGCGAA-1	adlib	ad_libitum_fed	Singlet	neuron	magnaclass1	0	0	0	0	0	0	0	0	0	0	0	0		0	0	0	0	0	1	43	0	0	0	0	no
adlib_Sample_3893_AT_7	CCACAAAAGCTGACAG-1	adlib	ad_libitum_fed	Singlet	neuron	magnaclass2	0	0	0	0	0	0	0	0	0	0	0	0		0	0	0	0	0	0	0	0	0	0	0	no
adlib_Sample_3893_AT_7	CCACAAAAGTGTTCAC-1	adlib	ad_libitum_fed	Singlet	neuron	corelautus_class	0	0	0	0	0	0	0	0	0	0	0	0		0	0	0	0	0	0	0	0	0	0	0	no
adlib_Sample_3893_AT_7	CCACAAACAAGCAATA-1	adlib	ad_libitum_fed	Singlet	neuron	magnaclass1	0	0	0	0	0	0	0	0	0	0	1	0		1	45	1	34	6	1	43	0	0	0	0	yes
adlib_Sample_3893_AT_7	CCACAAACACTGTTCC-1	adlib	ad_libitum_fed	Singlet	neuron	Lhx2_class	0	0	0	0	0	0	0	0	0	0	1	0		1	5	1	0	3	0	0	0	0	0	0	yes
adlib_Sample_3893_AT_7	CCACAAAGTGTTCGAT-1	adlib	ad_libitum_fed	Singlet	neuron	monoamine_class	1	87	0	0	0	0	0	0	0	0	0	0		0	0	0	0	0	0	0	0	0	1	97	yes
adlib_Sample_3893_AT_7	CCACAAAGTTGTGTAC-1	adlib	ad_libitum_fed	Singlet	neuron	Lrmda_class	0	0	0	0	0	0	0	0	0	0	1	0		1	52	1	0	82	0	0	0	0	0	0	yes
adlib_Sample_3893_AT_7	CCACAAATCCTCATAT-1	adlib	ad_libitum_fed	Singlet	neuron	magnaclass2	0	0	0	0	0	0	0	0	0	0	0	0		0	0	0	0	0	0	0	0	0	0	0	no
adlib_Sample_3893_AT_7	CCACACTGTGCCCACA-1	adlib	ad_libitum_fed	Singlet	neuron	magnaclass2	0	0	0	0	0	0	0	0	0	0	0	0		0	0	0	0	0	0	0	0	0	1	53	no
adlib_Sample_3893_AT_7	CCACACTGTTAGTCGT-1	adlib	ad_libitum_fed	Singlet	neuron	magnaclass2	0	0	0	0	0	0	0	0	0	0	1	0		1	61	0	0	0	0	0	0	0	0	0	no
adlib_Sample_3893_AT_7	CCACACTTCTGTAACG-1	adlib	ad_libitum_fed	Singlet	neuron	monoamine_class	0	0	0	0	0	0	0	0	0	0	0	0		0	0	0	0	0	0	0	0	0	0	0	no
adlib_Sample_3893_AT_7	CCACCATAGATTAGCA-1	adlib	ad_libitum_fed	Singlet	neuron	magnaclass1	0	0	0	0	0	0	0	0	0	0	0	0		0	0	1	0	59	0	0	0	0	0	0	no
adlib_Sample_3893_AT_7	CCACCATAGCCTAACT-1	adlib	ad_libitum_fed	Singlet	neuron	magnaclass2	0	0	0	0	0	0	0	0	0	0	1	0		1	52	0	0	0	0	0	1	80	0	0	yes
adlib_Sample_3893_AT_7	CCACCATGTGAGTTGG-1	adlib	ad_libitum_fed	Singlet	neuron	magnaclass2	0	0	0	0	1	81	0	0	0	0	0	0		0	0	0	0	0	0	0	0	0	0	0	no
adlib_Sample_3893_AT_7	CCACCATGTGCGCTCA-1	adlib	ad_libitum_fed	Singlet	neuron	magnaclass1	0	0	0	0	1	63	0	0	0	0	0	0		0	0	1	33	56	0	0	0	0	1	42	yes
adlib_Sample_3893_AT_7	CCACCATGTTGGAGGT-1	adlib	ad_libitum_fed	Singlet	neuron	magnaclass2	0	0	0	0	1	61	0	0	0	0	0	0		0	0	0	0	0	0	0	0	0	0	0	no
adlib_Sample_3893_AT_7	CCACCATTCATTGAGC-1	adlib	ad_libitum_fed	Singlet	neuron	Lhx2_class	0	0	0	0	0	0	0	0	0	0	0	0		0	0	0	0	0	0	0	0	0	0	0	no
adlib_Sample_3893_AT_7	CCACGAGAGCATTGAA-1	adlib	ad_libitum_fed	Singlet	neuron	magnaclass1	0	0	0	0	0	0	0	0	0	0	0	0		0	0	1	0	98	0	0	0	0	0	0	no
adlib_Sample_3893_AT_7	CCACGAGCAATAGGAT-1	adlib	ad_libitum_fed	Singlet	neuron	magnaclass2	0	0	0	0	0	0	0	0	0	0	0	0		0	0	0	0	0	0	0	0	0	0	0	no
adlib_Sample_3893_AT_7	CCACGAGCAGCGTATT-1	adlib	ad_libitum_fed	Singlet	neuron	magnaclass2	0	0	0	0	0	0	0	0	0	0	0	0		0	0	0	0	0	0	0	0	0	1	42	no
adlib_Sample_3893_AT_7	CCACGAGGTCTGGTTA-1	adlib	ad_libitum_fed	Singlet	neuron	magnaclass1	0	0	0	0	0	0	0	0	0	0	1	0		1	10	1	9	24	1	60	0	0	0	0	yes
adlib_Sample_3893_AT_7	CCACGAGTCGTTAGTG-1	adlib	ad_libitum_fed	Singlet	neuron	magnaclass1	0	0	0	0	0	0	0	0	0	0	0	0		0	0	1	0	97	0	0	0	0	0	0	no
adlib_Sample_3893_AT_7	CCACGAGTCTTCCTAA-1	adlib	ad_libitum_fed	Singlet	neuron	magnaclass2	0	0	0	0	0	0	0	0	0	0	1	0		1	4	1	4	3	1	2	0	0	0	0	yes
adlib_Sample_3893_AT_7	CCACGTTAGATGCAGC-1	adlib	ad_libitum_fed	Singlet	neuron	magnaclass2	0	0	0	0	0	0	0	0	0	0	1	0		1	21	0	0	0	0	0	0	0	1	25	yes
adlib_Sample_3893_AT_7	CCACGTTAGCTAGATA-1	adlib	ad_libitum_fed	Singlet	neuron	magnaclass2	0	0	0	0	0	0	0	0	0	0	1	0		1	53	1	0	8	0	0	0	0	0	0	yes
adlib_Sample_3893_AT_7	CCACGTTAGTTCCAGT-1	adlib	ad_libitum_fed	Singlet	neuron	monoamine_class	1	24	0	0	0	0	0	0	0	0	1	0		1	65	0	0	0	0	0	0	0	0	0	yes
adlib_Sample_3893_AT_7	CCACTTGAGAAGCCTG-1	adlib	ad_libitum_fed	Singlet	neuron	magnaclass1	0	0	0	0	0	0	0	0	0	0	0	0		0	0	0	0	0	0	0	0	0	0	0	no
adlib_Sample_3893_AT_7	CCACTTGAGTGGCAGT-1	adlib	ad_libitum_fed	Singlet	neuron	magnaclass2	0	0	0	0	0	0	0	0	0	0	1	0		1	25	0	0	0	0	0	0	0	1	27	yes
adlib_Sample_3893_AT_7	CCACTTGGTTCCTAAG-1	adlib	ad_libitum_fed	Singlet	neuron	Sall3_class	0	0	0	0	0	0	0	0	0	0	1	0		1	73	1	0	99	1	83	0	0	0	0	yes
adlib_Sample_3893_AT_7	CCATAAGAGGAACTCG-1	adlib	ad_libitum_fed	Singlet	neuron	magnaclass1	0	0	0	0	0	0	0	0	0	0	1	0		1	18	1	68	86	1	8	0	0	0	0	yes
adlib_Sample_3893_AT_7	CCATAAGAGGCGCTCT-1	adlib	ad_libitum_fed	Singlet	neuron	Lrmda_class	0	0	0	0	1	9	0	0	0	0	1	0		1	1	0	0	0	0	0	0	0	1	4	yes
adlib_Sample_3893_AT_7	CCATAAGCAATGTCTG-1	adlib	ad_libitum_fed	Singlet	neuron	magnaclass1	0	0	0	0	1	76	0	0	0	0	0	0		0	0	1	0	70	1	35	0	0	0	0	yes
adlib_Sample_3893_AT_7	CCATAAGCACGGCGTT-1	adlib	ad_libitum_fed	Singlet	neuron	corelautus_class	0	0	0	0	0	0	0	0	0	0	0	0		0	0	1	0	71	1	74	0	0	1	83	yes
adlib_Sample_3893_AT_7	CCATAAGGTACAACGG-1	adlib	ad_libitum_fed	Singlet	neuron	magnaclass2	0	0	0	0	0	0	0	0	0	0	1	0		1	20	0	0	0	0	0	0	0	0	0	no
adlib_Sample_3893_AT_7	CCATAAGGTCATGGCC-1	adlib	ad_libitum_fed	Singlet	neuron	Lhx2_class	0	0	0	0	0	0	0	0	0	0	1	0		1	63	0	0	0	0	0	0	0	0	0	no
adlib_Sample_3893_AT_7	CCATAAGGTTTAGACC-1	adlib	ad_libitum_fed	Singlet	neuron	magnaclass1	0	0	0	0	0	0	0	0	0	0	1	0		1	64	1	0	37	1	60	0	0	0	0	yes
adlib_Sample_3893_AT_7	CCATAAGTCCGAGGCT-1	adlib	ad_libitum_fed	Singlet	neuron	magnaclass2	1	72	0	0	0	0	0	0	0	0	0	0		0	0	0	0	0	1	47	0	0	0	0	yes
adlib_Sample_3893_AT_7	CCATAAGTCCGTAATG-1	adlib	ad_libitum_fed	Singlet	neuron	magnaclass2	0	0	1	23	0	0	0	0	0	0	1	0		1	25	0	0	0	0	0	0	0	1	28	yes
adlib_Sample_3893_AT_7	CCATAAGTCGACTCCT-1	adlib	ad_libitum_fed	Singlet	neuron	magnaclass1	0	0	0	0	0	0	0	0	0	0	0	0		0	0	1	0	43	1	43	1	95	1	86	yes
adlib_Sample_3893_AT_7	CCATCACAGACATACA-1	adlib	ad_libitum_fed	Singlet	neuron	magnaclass2	0	0	0	0	0	0	0	0	0	0	1	0		1	39	0	0	0	0	0	0	0	0	0	no
adlib_Sample_3893_AT_7	CCATCACAGGCCTTGC-1	adlib	ad_libitum_fed	Singlet	neuron	Lrmda_class	0	0	0	0	0	0	0	0	0	0	0	0		0	0	0	0	0	1	95	0	0	0	0	no
adlib_Sample_3893_AT_7	CCATCACAGTCGGCCT-1	adlib	ad_libitum_fed	Singlet	neuron	magnaclass1	0	0	0	0	0	0	0	0	0	0	1	0		1	84	1	0	58	0	0	0	0	0	0	yes
adlib_Sample_3893_AT_7	CCATCACAGTTGGGAC-1	adlib	ad_libitum_fed	Singlet	neuron	Sall3_class	0	0	0	0	0	0	0	0	0	0	0	0		0	0	1	0	92	0	0	0	0	0	0	no
adlib_Sample_3893_AT_7	CCATCACGTGGACCAA-1	adlib	ad_libitum_fed	Singlet	neuron	Sall3_class	0	0	0	0	1	57	0	0	0	0	0	0		0	0	0	0	0	0	0	0	0	1	83	yes
adlib_Sample_3893_AT_7	CCATCACTCTTACCAT-1	adlib	ad_libitum_fed	Singlet	neuron	corelautus_class	0	0	0	0	0	0	0	0	0	0	0	0		0	0	0	0	0	0	0	0	0	0	0	no
adlib_Sample_3893_AT_7	CCCAACTCAAACGTGG-1	adlib	ad_libitum_fed	Singlet	neuron	magnaclass2	0	0	0	0	0	0	0	0	0	0	0	0		0	0	0	0	0	0	0	0	0	0	0	no
adlib_Sample_3893_AT_7	CCCAACTCACTGCACG-1	adlib	ad_libitum_fed	Singlet	neuron	magnaclass2	0	0	0	0	0	0	0	0	0	0	0	0		0	0	0	0	0	0	0	0	0	0	0	no
adlib_Sample_3893_AT_7	CCCAACTCATGGGATG-1	adlib	ad_libitum_fed	Singlet	neuron	magnaclass1	0	0	0	0	1	44	0	0	0	0	0	0		0	0	1	51	0	0	0	0	0	1	26	yes
adlib_Sample_3893_AT_7	CCCAACTTCGCTAGCG-1	adlib	ad_libitum_fed	Singlet	neuron	magnaclass1	0	0	0	0	0	0	0	0	0	0	0	0		0	0	1	0	86	0	0	0	0	0	0	no
adlib_Sample_3893_AT_7	CCCATTGAGGGTTAAT-1	adlib	ad_libitum_fed	Singlet	neuron	Lrmda_class	0	0	0	0	0	0	0	0	0	0	0	0		0	0	0	0	0	1	19	1	41	1	70	yes
adlib_Sample_3893_AT_7	CCCATTGAGTCGCGAA-1	adlib	ad_libitum_fed	Singlet	neuron	magnaclass1	0	0	0	0	0	0	0	0	0	0	0	0		0	0	1	46	68	1	33	0	0	0	0	yes
adlib_Sample_3893_AT_7	CCCATTGCAGCTTTGA-1	adlib	ad_libitum_fed	Singlet	neuron	monoamine_class	0	0	0	0	0	0	0	0	0	0	0	0		0	0	0	0	0	1	15	0	0	0	0	no
adlib_Sample_3893_AT_7	CCCATTGGTAGCGTCC-1	adlib	ad_libitum_fed	Singlet	neuron	magnaclass1	0	0	0	0	0	0	0	0	0	0	0	0		0	0	1	0	91	0	0	0	0	1	93	yes
adlib_Sample_3893_AT_7	CCCGAAGAGCTAGATA-1	adlib	ad_libitum_fed	Singlet	neuron	magnaclass1	0	0	0	0	0	0	0	0	0	0	0	0		0	0	1	63	82	0	0	0	0	0	0	no
adlib_Sample_3893_AT_7	CCCGAAGTCCATCTGC-1	adlib	ad_libitum_fed	Singlet	neuron	corelautus_class	1	98	0	0	0	0	0	0	0	0	0	0		0	0	0	0	0	0	0	0	0	1	96	yes
adlib_Sample_3893_AT_7	CCCGGAAAGCGTCTGC-1	adlib	ad_libitum_fed	Singlet	neuron	magnaclass2	0	0	0	0	1	98	0	0	0	0	0	0		0	0	0	0	0	0	0	0	0	0	0	no
adlib_Sample_3893_AT_7	CCCGGAAAGTAGGAAG-1	adlib	ad_libitum_fed	Singlet	neuron	magnaclass1	0	0	0	0	0	0	0	0	0	0	1	0		1	46	1	36	58	1	61	0	0	0	0	yes
adlib_Sample_3893_AT_7	CCCGGAAGTTATTCCT-1	adlib	ad_libitum_fed	Singlet	neuron	magnaclass2	0	0	0	0	0	0	0	0	0	0	1	0		1	23	0	0	0	0	0	0	0	0	0	no
adlib_Sample_3893_AT_7	CCCGGAATCCTGCCAT-1	adlib	ad_libitum_fed	Singlet	neuron	magnaclass2	0	0	0	0	0	0	0	0	0	0	1	0		1	65	0	0	0	0	0	0	0	0	0	no
adlib_Sample_3893_AT_7	CCCGGAATCGACATCA-1	adlib	ad_libitum_fed	Singlet	neuron	magnaclass2	0	0	0	0	0	0	0	0	0	0	1	0		1	54	0	0	0	0	0	0	0	1	69	yes
adlib_Sample_3893_AT_7	CCCGGAATCTTAAGGC-1	adlib	ad_libitum_fed	Singlet	neuron	magnaclass2	0	0	0	0	0	0	0	0	0	0	0	0		0	0	0	0	0	0	0	0	0	0	0	no
adlib_Sample_3893_AT_7	CCCTAACCACGTGAGA-1	adlib	ad_libitum_fed	Singlet	neuron	magnaclass1	0	0	0	0	0	0	0	0	0	0	1	0		1	48	1	0	7	1	46	0	0	0	0	yes
adlib_Sample_3893_AT_7	CCCTAACCAGGGTTGA-1	adlib	ad_libitum_fed	Singlet	neuron	Sall3_class	0	0	0	0	1	91	0	0	0	0	1	0		1	89	0	0	0	0	0	0	0	0	0	yes
adlib_Sample_3893_AT_7	CCCTAACGTTCGTAAC-1	adlib	ad_libitum_fed	Singlet	neuron	magnaclass1	0	0	0	0	0	0	0	0	0	0	1	0		1	55	1	0	15	1	30	0	0	0	0	yes
adlib_Sample_3893_AT_7	CCCTAACTCCGGTTCT-1	adlib	ad_libitum_fed	Singlet	neuron	magnaclass2	0	0	0	0	0	0	0	0	0	0	1	0		1	63	0	0	0	0	0	0	0	0	0	no
adlib_Sample_3893_AT_7	CCCTCAAAGACTAGAT-1	adlib	ad_libitum_fed	Singlet	neuron	magnaclass1	0	0	0	0	1	31	0	0	0	0	1	0		1	11	1	0	25	1	45	0	0	1	76	yes
adlib_Sample_3893_AT_7	CCCTCAAAGGGCAAGG-1	adlib	ad_libitum_fed	Singlet	neuron	magnaclass2	0	0	0	0	0	0	0	0	0	0	0	0		0	0	0	0	0	0	0	0	0	0	0	no
adlib_Sample_3893_AT_7	CCCTCAACAGTATGAA-1	adlib	ad_libitum_fed	Singlet	neuron	magnaclass2	0	0	0	0	0	0	0	0	0	0	1	0		1	66	0	0	0	0	0	0	0	0	0	no
adlib_Sample_3893_AT_7	CCCTCTCAGAGCAGAA-1	adlib	ad_libitum_fed	Singlet	neuron	magnaclass1	0	0	0	0	0	0	0	0	0	0	0	0		0	0	1	0	97	1	60	0	0	1	74	yes
adlib_Sample_3893_AT_7	CCCTCTCAGCCACCGT-1	adlib	ad_libitum_fed	Singlet	neuron	magnaclass2	0	0	0	0	0	0	0	0	0	0	1	0		1	41	0	0	0	0	0	0	0	0	0	no
adlib_Sample_3893_AT_7	CCCTCTCAGGGAGGAC-1	adlib	ad_libitum_fed	Singlet	neuron	Sall3_class	0	0	0	0	0	0	0	0	0	0	1	0		1	18	1	15	79	1	34	0	0	1	54	yes
adlib_Sample_3893_AT_7	CCCTCTCCACCAGTAT-1	adlib	ad_libitum_fed	Singlet	neuron	magnaclass1	0	0	0	0	0	0	0	0	0	0	1	0		1	6	1	0	48	1	62	0	0	0	0	yes
adlib_Sample_3893_AT_7	CCCTCTCTCAGGGATG-1	adlib	ad_libitum_fed	Singlet	neuron	Lrmda_class	0	0	0	0	1	53	0	0	0	0	1	0		1	32	0	0	0	0	0	0	0	0	0	yes
adlib_Sample_3893_AT_7	CCCTGATAGCCTTTGA-1	adlib	ad_libitum_fed	Singlet	neuron	Sall3_class	0	0	0	0	0	0	0	0	0	0	1	0		1	21	1	72	11	0	0	0	0	0	0	yes
adlib_Sample_3893_AT_7	CCCTGATAGGTAGTAT-1	adlib	ad_libitum_fed	Singlet	neuron	Sall3_class	0	0	0	0	0	0	0	0	0	0	0	0		0	0	1	85	37	0	0	0	0	0	0	no
adlib_Sample_3893_AT_7	CCCTGATAGTAACAGT-1	adlib	ad_libitum_fed	Singlet	neuron	magnaclass1	0	0	0	0	0	0	0	0	0	0	1	0		1	83	1	71	0	1	59	1	46	0	0	yes
adlib_Sample_3893_AT_7	CCCTGATCAAACTAAG-1	adlib	ad_libitum_fed	Singlet	neuron	magnaclass1	0	0	0	0	0	0	0	0	0	0	0	0		0	0	1	0	59	1	62	1	63	1	76	yes
adlib_Sample_3893_AT_7	CCCTGATCAACAGTGG-1	adlib	ad_libitum_fed	Singlet	neuron	magnaclass1	0	0	0	0	0	0	0	0	0	0	0	0		0	0	1	0	81	0	0	0	0	0	0	no
adlib_Sample_3893_AT_7	CCCTGATCACCTCAGG-1	adlib	ad_libitum_fed	Singlet	neuron	monoamine_class	0	0	0	0	0	0	0	0	0	0	0	0		0	0	1	0	10	0	0	0	0	0	0	no
adlib_Sample_3893_AT_7	CCCTGATCACTTTAGG-1	adlib	ad_libitum_fed	Singlet	neuron	Lhx2_class	0	0	0	0	0	0	0	0	0	0	0	0		0	0	0	0	0	0	0	0	0	1	79	no
adlib_Sample_3893_AT_7	CCCTGATCATCGTTCC-1	adlib	ad_libitum_fed	Singlet	neuron	monoamine_class	0	0	0	0	0	0	0	0	0	0	1	0		1	77	0	0	0	0	0	1	91	0	0	yes
adlib_Sample_3893_AT_7	CCCTGATGTACTGGGA-1	adlib	ad_libitum_fed	Singlet	neuron	magnaclass2	0	0	0	0	0	0	0	0	0	0	0	0		0	0	0	0	0	0	0	0	0	0	0	no
adlib_Sample_3893_AT_7	CCCTGATGTATGAGGC-1	adlib	ad_libitum_fed	Singlet	neuron	magnaclass1	0	0	0	0	0	0	0	0	0	0	0	0		0	0	0	0	0	1	20	0	0	0	0	no
adlib_Sample_3893_AT_7	CCCTGATTCCTCGCAT-1	adlib	ad_libitum_fed	Singlet	neuron	Sall3_class	0	0	0	0	0	0	0	0	0	0	1	0		1	67	1	54	0	0	0	0	0	0	0	yes
adlib_Sample_3893_AT_7	CCCTTAGAGACTTCGT-1	adlib	ad_libitum_fed	Singlet	neuron	magnaclass1	0	0	0	0	1	89	0	0	0	0	0	0		0	0	0	0	0	1	97	1	77	0	0	yes
adlib_Sample_3893_AT_7	CCCTTAGAGCATATGA-1	adlib	ad_libitum_fed	Singlet	neuron	corelautus_class	0	0	0	0	0	0	0	0	0	0	0	0		0	0	0	0	0	0	0	0	0	0	0	no
adlib_Sample_3893_AT_7	CCCTTAGAGGATGAGA-1	adlib	ad_libitum_fed	Singlet	neuron	magnaclass2	0	0	0	0	0	0	0	0	0	0	1	0		1	57	0	0	0	0	0	0	0	0	0	no
adlib_Sample_3893_AT_7	CCCTTAGCATTGACAC-1	adlib	ad_libitum_fed	Singlet	neuron	magnaclass2	0	0	0	0	0	0	0	0	0	0	0	0		0	0	0	0	0	0	0	0	0	0	0	no
adlib_Sample_3893_AT_7	CCCTTAGGTGCGGTAA-1	adlib	ad_libitum_fed	Singlet	neuron	magnaclass1	0	0	0	0	0	0	0	0	0	0	1	0		1	67	1	54	40	1	78	0	0	0	0	yes
adlib_Sample_3893_AT_7	CCGAACGCAGCACCCA-1	adlib	ad_libitum_fed	Singlet	neuron	Lhx2_class	0	0	0	0	0	0	0	0	0	0	0	0		0	0	0	0	0	0	0	0	0	0	0	no
adlib_Sample_3893_AT_7	CCGAACGGTCTGTGAT-1	adlib	ad_libitum_fed	Singlet	neuron	magnaclass2	0	0	0	0	0	0	0	0	0	0	0	0		0	0	0	0	0	0	0	0	0	0	0	no
adlib_Sample_3893_AT_7	CCGAACGGTTTACACG-1	adlib	ad_libitum_fed	Singlet	neuron	Sall3_class	0	0	0	0	1	68	0	0	0	0	0	0		0	0	1	0	80	1	84	0	0	1	77	yes
adlib_Sample_3893_AT_7	CCGATCTCACGGATCC-1	adlib	ad_libitum_fed	Singlet	neuron	magnaclass1	0	0	0	0	0	0	0	0	0	0	0	0		0	0	1	45	33	1	71	0	0	1	81	yes
adlib_Sample_3893_AT_7	CCGATCTTCAGCCCAG-1	adlib	ad_libitum_fed	Singlet	neuron	magnaclass1	0	0	0	0	0	0	0	0	0	0	0	0		0	0	1	0	66	0	0	0	0	0	0	no
adlib_Sample_3893_AT_7	CCGATGGAGCTTTCCC-1	adlib	ad_libitum_fed	Singlet	neuron	magnaclass1	0	0	0	0	0	0	0	0	0	0	1	0		1	90	1	0	98	1	32	0	0	0	0	yes
adlib_Sample_3893_AT_7	CCGATGGTCATCCCGT-1	adlib	ad_libitum_fed	Singlet	neuron	magnaclass1	0	0	0	0	0	0	0	0	0	0	1	0		1	51	1	0	62	1	27	1	69	0	0	yes
adlib_Sample_3893_AT_7	CCGCAAGAGCAGGCTA-1	adlib	ad_libitum_fed	Singlet	neuron	magnaclass2	0	0	0	0	0	0	0	0	0	0	0	0		0	0	0	0	0	0	0	0	0	0	0	no
adlib_Sample_3893_AT_7	CCGCAAGGTCACTAGT-1	adlib	ad_libitum_fed	Singlet	neuron	Golli_class	0	0	0	0	0	0	0	0	0	0	0	0		0	0	0	0	0	0	0	0	0	0	0	no
adlib_Sample_3893_AT_7	CCGCAAGGTCGGTACC-1	adlib	ad_libitum_fed	Singlet	neuron	magnaclass1	0	0	0	0	1	73	0	0	0	0	0	0		0	0	0	0	0	1	31	0	0	0	0	yes
adlib_Sample_3893_AT_7	CCGCAAGTCATCTATC-1	adlib	ad_libitum_fed	Singlet	neuron	magnaclass1	0	0	0	0	1	48	0	0	0	0	0	0		0	0	1	20	0	1	12	0	0	0	0	yes
adlib_Sample_3893_AT_7	CCGCAAGTCTGCCTGT-1	adlib	ad_libitum_fed	Singlet	neuron	magnaclass1	0	0	0	0	0	0	0	0	0	0	0	0		0	0	1	58	0	0	0	0	0	1	64	yes
adlib_Sample_3893_AT_7	CCGGACAAGCACTCTA-1	adlib	ad_libitum_fed	Singlet	neuron	magnaclass2	0	0	0	0	0	0	0	0	0	0	0	0		0	0	1	0	40	0	0	0	0	0	0	no
adlib_Sample_3893_AT_7	CCGGACAAGGAGTCTG-1	adlib	ad_libitum_fed	Singlet	neuron	magnaclass1	0	0	0	0	0	0	0	0	0	0	1	0		1	34	0	0	0	1	49	0	0	0	0	yes
adlib_Sample_3893_AT_7	CCGGACACAAATTAGG-1	adlib	ad_libitum_fed	Singlet	neuron	magnaclass2	1	38	0	0	0	0	0	0	0	0	0	0		0	0	0	0	0	0	0	0	0	0	0	no
adlib_Sample_3893_AT_7	CCGGGTACAAATGAAC-1	adlib	ad_libitum_fed	Singlet	neuron	magnaclass1	0	0	0	0	0	0	0	0	0	0	0	0		0	0	1	0	88	0	0	0	0	0	0	no
adlib_Sample_3893_AT_7	CCGGGTAGTACTGAGG-1	adlib	ad_libitum_fed	Singlet	neuron	magnaclass1	0	0	0	0	0	0	0	0	0	0	0	0		0	0	1	45	0	0	0	0	0	0	0	no
adlib_Sample_3893_AT_7	CCGGGTAGTCGTGATT-1	adlib	ad_libitum_fed	Singlet	neuron	Sall3_class	0	0	0	0	1	72	0	0	0	0	1	0		1	56	1	0	31	1	87	0	0	0	0	yes
adlib_Sample_3893_AT_7	CCGGGTAGTTGACTAC-1	adlib	ad_libitum_fed	Singlet	neuron	magnaclass1	0	0	0	0	0	0	0	0	0	0	0	0		0	0	1	60	45	1	98	0	0	1	65	yes
adlib_Sample_3893_AT_7	CCGGGTATCAGAACCT-1	adlib	ad_libitum_fed	Singlet	neuron	magnaclass2	1	91	0	0	0	0	0	0	0	0	0	0		0	0	0	0	0	0	0	0	0	0	0	no
adlib_Sample_3893_AT_7	CCGGTAGAGCAATTCC-1	adlib	ad_libitum_fed	Singlet	neuron	monoamine_class	0	0	1	89	0	0	1	83	0	0	0	0		0	0	0	0	0	0	0	0	0	0	0	no
adlib_Sample_3893_AT_7	CCGGTAGAGGATACCG-1	adlib	ad_libitum_fed	Singlet	neuron	Lhx2_class	0	0	0	0	0	0	0	0	0	0	1	0		1	65	0	0	0	0	0	0	0	1	39	yes
adlib_Sample_3893_AT_7	CCGGTAGTCTCCAATT-1	adlib	ad_libitum_fed	Singlet	neuron	magnaclass2	0	0	0	0	1	39	0	0	0	0	1	0		1	18	1	14	0	0	0	0	0	0	0	yes
adlib_Sample_3893_AT_7	CCGGTGAAGATGTTCC-1	adlib	ad_libitum_fed	Singlet	neuron	Sall3_class	0	0	0	0	0	0	0	0	0	0	0	0		0	0	1	48	0	1	73	0	0	0	0	yes
adlib_Sample_3893_AT_7	CCGGTGAAGGACGGAG-1	adlib	ad_libitum_fed	Singlet	neuron	Sall3_class	0	0	0	0	0	0	0	0	0	0	1	0		1	95	1	0	76	1	80	0	0	0	0	yes
adlib_Sample_3893_AT_7	CCGGTGAAGGTCATTC-1	adlib	ad_libitum_fed	Singlet	neuron	magnaclass1	0	0	0	0	0	0	0	0	0	0	0	0		0	0	1	99	0	1	31	0	0	1	52	yes
adlib_Sample_3893_AT_7	CCGGTGACATATGGCT-1	adlib	ad_libitum_fed	Singlet	neuron	monoamine_class	0	0	1	70	1	49	1	22	0	0	0	0		0	0	0	0	0	1	13	0	0	0	0	yes
adlib_Sample_3893_AT_7	CCGTAGGAGCCGAACA-1	adlib	ad_libitum_fed	Singlet	neuron	magnaclass1	0	0	0	0	0	0	0	0	0	0	0	0		0	0	1	0	61	0	0	1	95	0	0	yes
adlib_Sample_3893_AT_7	CCGTAGGCAGTGGTGA-1	adlib	ad_libitum_fed	Singlet	neuron	Lrmda_class	0	0	0	0	0	0	0	0	0	0	0	0		0	0	0	0	0	1	35	0	0	0	0	no
adlib_Sample_3893_AT_7	CCGTGAGAGCTGTGCC-1	adlib	ad_libitum_fed	Singlet	neuron	magnaclass1	0	0	0	0	1	92	0	0	0	0	1	0		1	58	1	81	33	0	0	0	0	0	0	yes
adlib_Sample_3893_AT_7	CCGTGAGAGTAGGAAG-1	adlib	ad_libitum_fed	Singlet	neuron	Sall3_class	0	0	0	0	0	0	0	0	0	0	0	0		0	0	1	65	50	0	0	0	0	0	0	no
adlib_Sample_3893_AT_7	CCGTGAGCAGGAATAT-1	adlib	ad_libitum_fed	Singlet	neuron	monoamine_class	0	0	0	0	0	0	0	0	0	0	0	0		0	0	0	0	0	0	0	0	0	0	0	no
adlib_Sample_3893_AT_7	CCGTGAGCATAGCACT-1	adlib	ad_libitum_fed	Singlet	neuron	corelautus_class	0	0	0	0	0	0	0	0	0	0	0	0		0	0	0	0	0	1	97	0	0	0	0	no
adlib_Sample_3893_AT_7	CCGTGAGTCGACGATT-1	adlib	ad_libitum_fed	Singlet	neuron	magnaclass2	0	0	0	0	0	0	0	0	0	0	1	0		1	63	0	0	0	0	0	1	61	0	0	yes
adlib_Sample_3893_AT_7	CCGTGAGTCTACACAG-1	adlib	ad_libitum_fed	Singlet	neuron	magnaclass1	0	0	0	0	0	0	0	0	0	0	0	0		0	0	1	0	34	0	0	0	0	0	0	no
adlib_Sample_3893_AT_7	CCGTTCAAGCACAAAT-1	adlib	ad_libitum_fed	Singlet	neuron	magnaclass2	0	0	0	0	1	57	0	0	0	0	0	0		0	0	0	0	0	0	0	0	0	0	0	no
adlib_Sample_3893_AT_7	CCGTTCAAGTTGAAGT-1	adlib	ad_libitum_fed	Singlet	neuron	magnaclass2	0	0	0	0	0	0	0	0	0	0	0	0		0	0	0	0	0	0	0	0	0	0	0	no
adlib_Sample_3893_AT_7	CCGTTCACATTCTCCG-1	adlib	ad_libitum_fed	Singlet	neuron	magnaclass1	0	0	0	0	0	0	0	0	0	0	1	0		1	96	0	0	0	1	14	1	35	1	32	yes
adlib_Sample_3893_AT_7	CCGTTCAGTACAGTAA-1	adlib	ad_libitum_fed	Singlet	neuron	magnaclass2	0	0	0	0	0	0	0	0	0	0	1	0		1	6	0	0	0	0	0	1	11	1	10	yes
adlib_Sample_3893_AT_7	CCGTTCAGTTCGAGCC-1	adlib	ad_libitum_fed	Singlet	neuron	magnaclass2	0	0	0	0	1	82	0	0	0	0	0	0		0	0	0	0	0	0	0	0	0	0	0	no
adlib_Sample_3893_AT_7	CCGTTCATCTGTACAG-1	adlib	ad_libitum_fed	Singlet	neuron	magnaclass2	0	0	0	0	0	0	0	0	0	0	1	0		1	84	0	0	0	0	0	1	10	0	0	yes
adlib_Sample_3893_AT_7	CCTAACCCATACAGCT-1	adlib	ad_libitum_fed	Singlet	neuron	Lrmda_class	0	0	0	0	0	0	0	0	0	0	1	0		1	13	1	40	7	1	66	1	52	0	0	yes
adlib_Sample_3893_AT_7	CCTAACCCATCGCTCT-1	adlib	ad_libitum_fed	Singlet	neuron	magnaclass1	0	0	0	0	0	0	0	0	0	0	1	0		1	67	1	79	5	0	0	0	0	0	0	yes
adlib_Sample_3893_AT_7	CCTAACCGTTCTCCTG-1	adlib	ad_libitum_fed	Singlet	neuron	magnaclass2	0	0	0	0	0	0	0	0	0	0	0	0		0	0	0	0	0	0	0	1	6	1	41	yes
adlib_Sample_3893_AT_7	CCTAACCGTTTCCAAG-1	adlib	ad_libitum_fed	Singlet	neuron	monoamine_class	0	0	0	0	0	0	0	0	0	0	0	0		0	0	0	0	0	0	0	0	0	1	57	no
adlib_Sample_3893_AT_7	CCTAACCTCTGCTTAT-1	adlib	ad_libitum_fed	Singlet	neuron	Lrmda_class	0	0	0	0	0	0	0	0	0	0	0	0		0	0	0	0	0	1	86	0	0	0	0	no
adlib_Sample_3893_AT_7	CCTAAGAAGCGACTAG-1	adlib	ad_libitum_fed	Singlet	neuron	magnaclass2	0	0	0	0	0	0	0	0	0	0	1	0		1	99	0	0	0	0	0	0	0	0	0	no
adlib_Sample_3893_AT_7	CCTAAGAAGCGTGCTC-1	adlib	ad_libitum_fed	Singlet	neuron	Lrmda_class	0	0	0	0	0	0	0	0	0	0	0	0		0	0	1	0	92	1	94	0	0	0	0	yes
adlib_Sample_3893_AT_7	CCTAAGAAGTAAGACT-1	adlib	ad_libitum_fed	Singlet	neuron	magnaclass2	0	0	0	0	0	0	0	0	0	0	0	0		0	0	0	0	0	0	0	0	0	0	0	no
adlib_Sample_3893_AT_7	CCTAAGAAGTCAGCGA-1	adlib	ad_libitum_fed	Singlet	neuron	magnaclass2	0	0	0	0	0	0	0	0	0	0	0	0		0	0	0	0	0	0	0	0	0	0	0	no
adlib_Sample_3893_AT_7	CCTAAGACATGACTGT-1	adlib	ad_libitum_fed	Singlet	neuron	magnaclass1	0	0	0	0	0	0	0	0	0	0	1	0		1	55	1	13	0	1	7	0	0	0	0	yes
adlib_Sample_3893_AT_7	CCTAAGAGTCTGTGGC-1	adlib	ad_libitum_fed	Singlet	neuron	magnaclass1	0	0	0	0	1	82	0	0	0	0	0	0		0	0	0	0	0	0	0	0	0	0	0	no
adlib_Sample_3893_AT_7	CCTAAGATCTCCAATT-1	adlib	ad_libitum_fed	Singlet	neuron	magnaclass2	0	0	0	0	0	0	0	0	0	0	1	1		1	17	0	0	0	0	0	0	0	0	0	no
adlib_Sample_3893_AT_7	CCTATCGAGAATGTTG-1	adlib	ad_libitum_fed	Singlet	neuron	magnaclass1	0	0	0	0	0	0	0	0	0	0	0	0		0	0	0	0	0	0	0	0	0	0	0	no
adlib_Sample_3893_AT_7	CCTATCGCAGAACTTC-1	adlib	ad_libitum_fed	Singlet	neuron	corelautus_class	0	0	0	0	0	0	0	0	0	0	0	0		0	0	1	98	0	0	0	0	0	0	0	no
adlib_Sample_3893_AT_7	CCTATCGTCGATTTCT-1	adlib	ad_libitum_fed	Singlet	neuron	monoamine_class	0	0	0	0	0	0	0	0	0	0	1	0		1	97	0	0	0	1	32	0	0	0	0	yes
adlib_Sample_3893_AT_7	CCTCAACAGCGGACAT-1	adlib	ad_libitum_fed	Singlet	neuron	magnaclass2	0	0	0	0	0	0	0	0	0	0	0	0		0	0	0	0	0	0	0	0	0	0	0	no
adlib_Sample_3893_AT_7	CCTCAACCACCGTCGA-1	adlib	ad_libitum_fed	Singlet	neuron	magnaclass1	0	0	0	0	0	0	0	0	0	0	1	0		1	34	1	26	49	1	17	0	0	0	0	yes
adlib_Sample_3893_AT_7	CCTCAACGTAACGGTG-1	adlib	ad_libitum_fed	Singlet	neuron	Lrmda_class	0	0	0	0	0	0	0	0	0	0	1	0		1	73	1	10	26	1	63	1	17	0	0	yes
adlib_Sample_3893_AT_7	CCTCAACGTCTCTCAC-1	adlib	ad_libitum_fed	Singlet	neuron	Sall3_class	0	0	0	0	1	56	0	0	0	0	0	0		0	0	1	26	0	0	0	0	0	1	68	yes
adlib_Sample_3893_AT_7	CCTCACATCTTACTGT-1	adlib	ad_libitum_fed	Singlet	neuron	monoamine_class	0	0	1	34	0	0	0	0	0	0	0	0		0	0	0	0	0	0	0	0	0	0	0	no
adlib_Sample_3893_AT_7	CCTCAGTAGAAATTCG-1	adlib	ad_libitum_fed	Singlet	neuron	Sall3_class	0	0	0	0	1	30	0	0	0	0	1	0		1	11	1	35	0	1	73	0	0	0	0	yes
adlib_Sample_3893_AT_7	CCTCAGTAGACTACCT-1	adlib	ad_libitum_fed	Singlet	neuron	Lhx2_class	0	0	0	0	0	0	0	0	0	0	1	0		1	52	0	0	0	0	0	0	0	0	0	no
adlib_Sample_3893_AT_7	CCTCAGTAGCAACAAT-1	adlib	ad_libitum_fed	Singlet	neuron	magnaclass2	0	0	0	0	0	0	0	0	0	0	0	0		0	0	0	0	0	0	0	0	0	0	0	no
adlib_Sample_3893_AT_7	CCTCAGTCACTTCATT-1	adlib	ad_libitum_fed	Singlet	neuron	magnaclass1	0	0	0	0	0	0	0	0	0	0	0	0		0	0	1	91	17	0	0	0	0	1	34	yes
adlib_Sample_3893_AT_7	CCTCAGTTCCGGTTCT-1	adlib	ad_libitum_fed	Singlet	neuron	magnaclass1	0	0	0	0	0	0	0	0	0	0	0	0		0	0	1	34	0	0	0	0	0	0	0	no
adlib_Sample_3893_AT_7	CCTCCAACAGCTATAC-1	adlib	ad_libitum_fed	Singlet	neuron	magnaclass1	0	0	0	0	0	0	0	0	0	0	0	0		0	0	1	70	22	1	22	0	0	0	0	yes
adlib_Sample_3893_AT_7	CCTCCAACATTGGATC-1	adlib	ad_libitum_fed	Singlet	neuron	Lrmda_class	0	0	0	0	0	0	0	0	0	0	1	0		1	46	1	0	44	1	24	0	0	0	0	yes
adlib_Sample_3893_AT_7	CCTCCAACATTGTGCA-1	adlib	ad_libitum_fed	Singlet	neuron	magnaclass1	0	0	0	0	0	0	0	0	0	0	0	0		0	0	1	22	43	1	44	0	0	0	0	yes
adlib_Sample_3893_AT_7	CCTCCAAGTACTGCCG-1	adlib	ad_libitum_fed	Singlet	neuron	Lhx2_class	0	0	0	0	0	0	0	0	0	0	1	0		1	19	1	0	10	0	0	0	0	0	0	yes
adlib_Sample_3893_AT_7	CCTCCAAGTATTTCGG-1	adlib	ad_libitum_fed	Singlet	neuron	magnaclass1	0	0	0	0	0	0	0	0	0	0	1	0		1	40	1	7	53	1	84	0	0	0	0	yes
adlib_Sample_3893_AT_7	CCTCCAATCTTCGACC-1	adlib	ad_libitum_fed	Singlet	neuron	Lhx2_class	0	0	0	0	1	14	0	0	0	0	1	0		1	23	0	0	0	0	0	0	0	0	0	yes
adlib_Sample_3893_AT_7	CCTCCTCAGCACCGAA-1	adlib	ad_libitum_fed	Singlet	neuron	magnaclass2	0	0	0	0	0	0	0	0	0	0	1	0		1	21	0	0	0	0	0	0	0	0	0	no
adlib_Sample_3893_AT_7	CCTCCTCAGGTCTACT-1	adlib	ad_libitum_fed	Singlet	neuron	monoamine_class	0	0	0	0	1	83	1	65	0	0	1	0		1	73	0	0	0	0	0	1	67	0	0	yes
adlib_Sample_3893_AT_7	CCTCCTCCAGAATCGG-1	adlib	ad_libitum_fed	Singlet	neuron	magnaclass1	0	0	0	0	0	0	0	0	0	0	1	0		1	73	1	0	45	1	46	0	0	1	65	yes
adlib_Sample_3893_AT_7	CCTCCTCGTATTAAGG-1	adlib	ad_libitum_fed	Singlet	neuron	magnaclass1	0	0	0	0	0	0	0	0	0	0	1	0		1	47	1	0	79	1	61	0	0	0	0	yes
adlib_Sample_3893_AT_7	CCTCCTCTCATGTCAG-1	adlib	ad_libitum_fed	Singlet	neuron	magnaclass1	0	0	0	0	0	0	0	0	0	0	0	0		0	0	1	62	0	0	0	0	0	1	67	yes
adlib_Sample_3893_AT_7	CCTCTAGAGGGATCAC-1	adlib	ad_libitum_fed	Singlet	neuron	magnaclass1	0	0	0	0	0	0	0	0	0	0	0	0		0	0	1	0	82	1	85	0	0	0	0	yes
adlib_Sample_3893_AT_7	CCTCTAGCACTCAGAT-1	adlib	ad_libitum_fed	Singlet	neuron	magnaclass2	0	0	0	0	0	0	0	0	0	0	1	0		1	5	0	0	0	0	0	0	0	1	33	yes
adlib_Sample_3893_AT_7	CCTCTAGGTATCCTCC-1	adlib	ad_libitum_fed	Singlet	neuron	magnaclass1	0	0	0	0	0	0	0	0	0	0	1	0		1	21	1	16	71	1	9	0	0	0	0	yes
adlib_Sample_3893_AT_7	CCTCTAGTCGGCATAT-1	adlib	ad_libitum_fed	Singlet	neuron	magnaclass2	0	0	0	0	0	0	0	0	0	0	1	0		1	60	0	0	0	0	0	0	0	1	55	yes
adlib_Sample_3893_AT_7	CCTCTAGTCTGCCTGT-1	adlib	ad_libitum_fed	Singlet	neuron	magnaclass2	0	0	0	0	0	0	0	0	0	0	1	0		1	36	0	0	0	0	0	0	0	0	0	no
adlib_Sample_3893_AT_7	CCTCTCCGTCCTCCTA-1	adlib	ad_libitum_fed	Singlet	neuron	magnaclass2	0	0	0	0	0	0	0	0	0	0	0	0		0	0	0	0	0	0	0	0	0	1	24	no
adlib_Sample_3893_AT_7	CCTCTCCTCCGTATGA-1	adlib	ad_libitum_fed	Singlet	neuron	magnaclass1	0	0	0	0	0	0	0	0	0	0	0	0		0	0	1	80	0	0	0	0	0	0	0	no
adlib_Sample_3893_AT_7	CCTCTCCTCGGCATAT-1	adlib	ad_libitum_fed	Singlet	neuron	magnaclass2	0	0	0	0	1	68	0	0	0	0	1	0		1	49	0	0	0	0	0	0	0	0	0	yes
adlib_Sample_3893_AT_7	CCTGCATAGAACGTGC-1	adlib	ad_libitum_fed	Singlet	neuron	magnaclass1	0	0	0	0	0	0	0	0	0	0	0	0		0	0	1	0	57	0	0	0	0	0	0	no
adlib_Sample_3893_AT_7	CCTGCATCAAATTAGG-1	adlib	ad_libitum_fed	Singlet	neuron	Sall3_class	0	0	0	0	0	0	0	0	0	0	0	0		0	0	1	0	94	0	0	0	0	0	0	no
adlib_Sample_3893_AT_7	CCTGCATCAACCACGC-1	adlib	ad_libitum_fed	Singlet	neuron	magnaclass1	0	0	0	0	0	0	0	0	0	0	1	0		1	45	1	0	24	0	0	1	88	0	0	yes
adlib_Sample_3893_AT_7	CCTGCATCACATGACT-1	adlib	ad_libitum_fed	Singlet	neuron	magnaclass1	0	0	0	0	0	0	0	0	0	0	0	0		0	0	1	0	35	0	0	0	0	1	56	yes
adlib_Sample_3893_AT_7	CCTGCATCAGAGGTTG-1	adlib	ad_libitum_fed	Singlet	neuron	Lrmda_class	0	0	0	0	0	0	0	0	0	0	0	0		0	0	1	17	0	1	61	0	0	0	0	yes
adlib_Sample_3893_AT_7	CCTGCATCAGCCGTTG-1	adlib	ad_libitum_fed	Singlet	neuron	Lrmda_class	0	0	0	0	0	0	0	0	0	0	1	0		1	19	0	0	0	1	9	0	0	0	0	yes
adlib_Sample_3893_AT_7	CCTGCATCATAAGCGG-1	adlib	ad_libitum_fed	Singlet	neuron	magnaclass1	0	0	1	77	0	0	0	0	0	0	0	0		0	0	0	0	0	1	78	0	0	1	85	yes
adlib_Sample_3893_AT_7	CCTGCATTCGCGTCGA-1	adlib	ad_libitum_fed	Singlet	neuron	magnaclass1	0	0	0	0	0	0	0	0	0	0	0	0		0	0	1	44	67	0	0	0	0	0	0	no
adlib_Sample_3893_AT_7	CCTGTTGAGCCTCTTC-1	adlib	ad_libitum_fed	Singlet	neuron	magnaclass2	0	0	0	0	1	53	0	0	0	0	0	0		0	0	0	0	0	0	0	0	0	1	81	yes
adlib_Sample_3893_AT_7	CCTGTTGAGGTTGGAC-1	adlib	ad_libitum_fed	Singlet	neuron	monoamine_class	0	0	0	0	1	93	0	0	0	0	0	0		0	0	0	0	0	0	0	0	0	0	0	no
adlib_Sample_3893_AT_7	CCTGTTGGTTGTTGTG-1	adlib	ad_libitum_fed	Singlet	neuron	Sall3_class	0	0	0	0	0	0	0	0	0	0	1	0		1	34	1	64	90	1	73	0	0	0	0	yes
adlib_Sample_3893_AT_7	CCTTCAGAGGATTCCT-1	adlib	ad_libitum_fed	Singlet	neuron	magnaclass1	0	0	0	0	0	0	0	0	0	0	0	0		0	0	1	0	69	1	89	0	0	1	54	yes
adlib_Sample_3893_AT_7	CCTTCAGAGGCATCTT-1	adlib	ad_libitum_fed	Singlet	neuron	Lhx2_class	0	0	0	0	0	0	0	0	0	0	0	0		0	0	0	0	0	0	0	1	31	0	0	no
adlib_Sample_3893_AT_7	CCTTCAGCACGCTTAA-1	adlib	ad_libitum_fed	Singlet	neuron	magnaclass2	0	0	0	0	0	0	0	0	0	0	1	0		1	52	0	0	0	0	0	1	52	0	0	yes
adlib_Sample_3893_AT_7	CCTTCAGGTACCACGC-1	adlib	ad_libitum_fed	Singlet	neuron	Lrmda_class	0	0	0	0	0	0	0	0	0	0	1	0		1	41	1	31	21	0	0	0	0	0	0	yes
adlib_Sample_3893_AT_7	CCTTCAGTCCGGTAGC-1	adlib	ad_libitum_fed	Singlet	neuron	Lrmda_class	0	0	0	0	0	0	0	0	0	0	1	0		1	67	1	31	54	1	57	0	0	0	0	yes
adlib_Sample_3893_AT_7	CCTTCAGTCCGTGTCT-1	adlib	ad_libitum_fed	Singlet	neuron	magnaclass1	0	0	0	0	0	0	0	0	0	0	0	0		0	0	1	0	80	1	98	0	0	0	0	yes
adlib_Sample_3893_AT_7	CCTTGTGCATCTTCGC-1	adlib	ad_libitum_fed	Singlet	neuron	Golli_class	0	0	0	0	0	0	0	0	0	0	0	0		0	0	1	73	0	1	81	0	0	0	0	yes
adlib_Sample_3893_AT_7	CCTTTGGAGTATGTAG-1	adlib	ad_libitum_fed	Singlet	neuron	Lhx2_class	0	0	0	0	0	0	0	0	0	0	0	0		0	0	0	0	0	0	0	0	0	0	0	no
adlib_Sample_3893_AT_7	CCTTTGGCAAGTATAG-1	adlib	ad_libitum_fed	Singlet	neuron	magnaclass2	0	0	0	0	0	0	0	0	0	0	1	0		1	92	0	0	0	0	0	0	0	0	0	no
adlib_Sample_3893_AT_7	CCTTTGGCATCTCCCA-1	adlib	ad_libitum_fed	Singlet	neuron	magnaclass2	0	0	0	0	0	0	0	0	0	0	1	0		1	30	1	0	15	0	0	0	0	1	32	yes
adlib_Sample_3893_AT_7	CCTTTGGGTACATACC-1	adlib	ad_libitum_fed	Singlet	neuron	magnaclass2	0	0	0	0	0	0	0	0	0	0	1	0		1	60	0	0	0	0	0	0	0	0	0	no
adlib_Sample_3893_AT_7	CCTTTGGTCAAGGCTT-1	adlib	ad_libitum_fed	Singlet	neuron	magnaclass1	0	0	0	0	0	0	0	0	0	0	1	0		1	68	1	55	0	0	0	0	0	0	0	yes
adlib_Sample_3893_AT_7	CCTTTGGTCAGGGTAG-1	adlib	ad_libitum_fed	Singlet	neuron	Lhx2_class	0	0	0	0	0	0	0	0	0	0	1	0		1	40	1	0	74	0	0	0	0	0	0	yes
adlib_Sample_3893_AT_7	CGAAGGAAGAGTCTTC-1	adlib	ad_libitum_fed	Singlet	neuron	magnaclass1	0	0	0	0	0	0	0	0	0	0	0	0		0	0	1	76	0	0	0	0	0	0	0	no
adlib_Sample_3893_AT_7	CGAAGGACATGACTAC-1	adlib	ad_libitum_fed	Singlet	neuron	magnaclass2	0	0	0	0	0	0	0	0	0	0	1	0		1	72	0	0	0	0	0	1	17	0	0	yes
adlib_Sample_3893_AT_7	CGAAGGAGTAACAGTA-1	adlib	ad_libitum_fed	Singlet	neuron	Lrmda_class	0	0	0	0	0	0	0	0	0	0	1	0		1	52	1	0	28	1	77	0	0	0	0	yes
adlib_Sample_3893_AT_7	CGAAGGAGTACCCAGC-1	adlib	ad_libitum_fed	Singlet	neuron	magnaclass1	0	0	0	0	0	0	0	0	0	0	0	0		0	0	1	0	84	0	0	0	0	0	0	no
adlib_Sample_3893_AT_7	CGAAGGATCCATTCGC-1	adlib	ad_libitum_fed	Singlet	neuron	Lrmda_class	0	0	0	0	0	0	0	0	0	0	1	0		1	6	1	0	4	1	81	0	0	0	0	yes
adlib_Sample_3893_AT_7	CGAAGTTAGGGTTGCA-1	adlib	ad_libitum_fed	Singlet	neuron	magnaclass1	0	0	0	0	0	0	0	0	0	0	1	0		1	94	1	0	40	0	0	0	0	0	0	yes
adlib_Sample_3893_AT_7	CGAAGTTCAACTCGAT-1	adlib	ad_libitum_fed	Singlet	neuron	Lrmda_class	0	0	0	0	0	0	0	0	0	0	0	0		0	0	1	33	23	1	58	0	0	0	0	yes
adlib_Sample_3893_AT_7	CGAAGTTCAATCCTAG-1	adlib	ad_libitum_fed	Singlet	neuron	magnaclass1	0	0	0	0	0	0	0	0	0	0	0	0		0	0	1	71	23	0	0	0	0	0	0	no
adlib_Sample_3893_AT_7	CGAAGTTCAATTTCGG-1	adlib	ad_libitum_fed	Singlet	neuron	monoamine_class	1	85	0	0	0	0	1	59	0	0	0	0		0	0	0	0	0	0	0	1	30	0	0	yes
adlib_Sample_3893_AT_7	CGAAGTTCACGCGTGT-1	adlib	ad_libitum_fed	Singlet	neuron	magnaclass1	0	0	0	0	0	0	0	0	0	0	0	0		0	0	1	0	74	0	0	0	0	0	0	no
adlib_Sample_3893_AT_7	CGAAGTTCAGTCAACT-1	adlib	ad_libitum_fed	Singlet	neuron	magnaclass1	0	0	0	0	1	74	0	0	0	0	0	0		0	0	1	0	86	1	33	0	0	0	0	yes
adlib_Sample_3893_AT_7	CGAAGTTCAGTGCGCT-1	adlib	ad_libitum_fed	Singlet	neuron	magnaclass1	0	0	0	0	0	0	0	0	0	0	0	0		0	0	1	99	0	0	0	0	0	0	0	no
adlib_Sample_3893_AT_7	CGAAGTTTCGTCGGGT-1	adlib	ad_libitum_fed	Singlet	neuron	magnaclass2	0	0	0	0	1	83	0	0	0	0	0	0		0	0	0	0	0	0	0	0	0	1	66	yes
adlib_Sample_3893_AT_7	CGAATTGAGACTAGAT-1	adlib	ad_libitum_fed	Singlet	neuron	magnaclass2	0	0	0	0	0	0	0	0	0	0	0	0		0	0	0	0	0	0	0	0	0	1	97	no
adlib_Sample_3893_AT_7	CGAATTGGTCGTTGCG-1	adlib	ad_libitum_fed	Singlet	neuron	magnaclass1	0	0	0	0	0	0	0	0	0	0	0	0		0	0	1	58	43	1	81	0	0	0	0	yes
adlib_Sample_3893_AT_7	CGAATTGGTGTATCCA-1	adlib	ad_libitum_fed	Singlet	neuron	magnaclass1	0	0	0	0	0	0	0	0	0	0	0	0		0	0	1	97	81	1	48	0	0	0	0	yes
adlib_Sample_3893_AT_7	CGAATTGGTTAGGACG-1	adlib	ad_libitum_fed	Singlet	neuron	magnaclass1	0	0	0	0	0	0	0	0	0	0	0	0		0	0	1	0	96	0	0	0	0	0	0	no
adlib_Sample_3893_AT_7	CGAATTGTCCTACGAA-1	adlib	ad_libitum_fed	Singlet	neuron	magnaclass1	0	0	0	0	0	0	0	0	0	0	0	0		0	0	1	0	71	1	17	0	0	0	0	yes
adlib_Sample_3893_AT_7	CGACAGCAGTTCATGC-1	adlib	ad_libitum_fed	Singlet	neuron	Sall3_class	0	0	0	0	0	0	0	0	0	0	0	0		0	0	1	84	0	1	19	0	0	0	0	yes
adlib_Sample_3893_AT_7	CGACAGCCAACGACTT-1	adlib	ad_libitum_fed	Singlet	neuron	Sall3_class	0	0	0	0	0	0	0	0	0	0	1	0		1	8	1	31	5	1	56	0	0	1	60	yes
adlib_Sample_3893_AT_7	CGACAGCCACATGGTT-1	adlib	ad_libitum_fed	Singlet	neuron	magnaclass2	0	0	0	0	0	0	0	0	0	0	0	0		0	0	0	0	0	0	0	0	0	1	94	no
adlib_Sample_3893_AT_7	CGACAGCCATATTCGG-1	adlib	ad_libitum_fed	Singlet	neuron	magnaclass2	0	0	0	0	0	0	0	0	0	0	1	0		1	86	0	0	0	0	0	0	0	0	0	no
adlib_Sample_3893_AT_7	CGACAGCGTCCTCCAT-1	adlib	ad_libitum_fed	Singlet	neuron	monoamine_class	0	0	0	0	0	0	0	0	0	0	0	0		0	0	0	0	0	0	0	1	88	1	62	yes
adlib_Sample_3893_AT_7	CGAGAAGCAAAGAGTT-1	adlib	ad_libitum_fed	Singlet	neuron	magnaclass2	0	0	0	0	0	0	0	0	0	0	0	0		0	0	0	0	0	0	0	0	0	0	0	no
adlib_Sample_3893_AT_7	CGAGAAGCAGCCGTCA-1	adlib	ad_libitum_fed	Singlet	neuron	magnaclass1	0	0	0	0	0	0	0	0	0	0	0	0		0	0	1	0	94	0	0	0	0	0	0	no
adlib_Sample_3893_AT_7	CGAGAAGGTGACCGAA-1	adlib	ad_libitum_fed	Singlet	neuron	magnaclass1	0	0	0	0	0	0	0	0	0	0	0	0		0	0	0	0	0	0	0	0	0	0	0	no
adlib_Sample_3893_AT_7	CGAGGAACATTCTTCA-1	adlib	ad_libitum_fed	Singlet	neuron	magnaclass2	0	0	0	0	0	0	0	0	0	0	0	0		0	0	0	0	0	0	0	0	0	1	73	no
adlib_Sample_3893_AT_7	CGAGGAAGTACTCAAC-1	adlib	ad_libitum_fed	Singlet	neuron	Lrmda_class	0	0	0	0	0	0	0	0	0	0	0	0		0	0	1	17	38	0	0	0	0	0	0	no
adlib_Sample_3893_AT_7	CGAGGAATCCCAGTGG-1	adlib	ad_libitum_fed	Singlet	neuron	corelautus_class	0	0	0	0	0	0	0	0	0	0	0	0		0	0	0	0	0	1	97	0	0	0	0	no
adlib_Sample_3893_AT_7	CGAGGAATCCGATCGG-1	adlib	ad_libitum_fed	Singlet	neuron	Sall3_class	0	0	0	0	0	0	0	0	0	0	1	0		1	97	1	92	51	0	0	0	0	0	0	yes
adlib_Sample_3893_AT_7	CGAGGCTAGCGCCCAT-1	adlib	ad_libitum_fed	Singlet	neuron	magnaclass2	0	0	0	0	0	0	0	0	0	0	1	0		1	98	0	0	0	0	0	0	0	0	0	no
adlib_Sample_3893_AT_7	CGAGGCTAGTCAGCCC-1	adlib	ad_libitum_fed	Singlet	neuron	magnaclass1	0	0	0	0	0	0	0	0	0	0	1	1		0	0	1	39	28	1	27	0	0	0	0	yes
adlib_Sample_3893_AT_7	CGAGGCTCAATGACCT-1	adlib	ad_libitum_fed	Singlet	neuron	magnaclass1	0	0	0	0	0	0	0	0	0	0	0	0		0	0	1	83	94	0	0	0	0	1	95	yes
adlib_Sample_3893_AT_7	CGAGGCTGTGGCTAGA-1	adlib	ad_libitum_fed	Singlet	neuron	magnaclass1	0	0	0	0	0	0	0	0	0	0	1	0		1	98	1	0	87	1	57	0	0	0	0	yes
adlib_Sample_3893_AT_7	CGAGGCTTCGATCCAA-1	adlib	ad_libitum_fed	Singlet	neuron	monoamine_class	0	0	0	0	0	0	0	0	0	0	0	0		0	0	0	0	0	0	0	0	0	0	0	no
adlib_Sample_3893_AT_7	CGAGGCTTCTCATTGT-1	adlib	ad_libitum_fed	Singlet	neuron	corelautus_class	0	0	0	0	0	0	0	0	0	0	0	0		0	0	0	0	0	0	0	1	97	0	0	no
adlib_Sample_3893_AT_7	CGAGGCTTCTCTATGT-1	adlib	ad_libitum_fed	Singlet	neuron	pH_class	0	0	0	0	0	0	0	0	0	0	0	0		0	0	0	0	0	0	0	0	0	0	0	no
adlib_Sample_3893_AT_7	CGAGTGCAGTACAGCG-1	adlib	ad_libitum_fed	Singlet	neuron	magnaclass1	0	0	0	0	0	0	0	0	0	0	0	0		0	0	1	79	0	1	30	0	0	0	0	yes
adlib_Sample_3893_AT_7	CGAGTGCCAAAGGATT-1	adlib	ad_libitum_fed	Singlet	neuron	monoamine_class	0	0	0	0	0	0	0	0	0	0	0	0		0	0	0	0	0	0	0	0	0	0	0	no
adlib_Sample_3893_AT_7	CGAGTGCGTGCTGATT-1	adlib	ad_libitum_fed	Singlet	neuron	magnaclass1	0	0	0	0	0	0	0	0	0	0	0	0		0	0	1	0	95	1	55	0	0	0	0	yes
adlib_Sample_3893_AT_7	CGAGTGCTCAACACCA-1	adlib	ad_libitum_fed	Singlet	neuron	Lrmda_class	0	0	0	0	0	0	0	0	0	0	0	0		0	0	1	3	12	1	52	0	0	0	0	yes
adlib_Sample_3893_AT_7	CGAGTTACAAATGGCG-1	adlib	ad_libitum_fed	Singlet	neuron	magnaclass1	0	0	0	0	1	87	0	0	0	0	1	0		1	80	1	68	53	0	0	0	0	0	0	yes
adlib_Sample_3893_AT_7	CGAGTTACAGTTGGTT-1	adlib	ad_libitum_fed	Singlet	neuron	Lrmda_class	0	0	0	0	1	86	0	0	0	0	0	0		0	0	1	65	0	1	86	0	0	0	0	yes
adlib_Sample_3893_AT_7	CGAGTTACATTACTCT-1	adlib	ad_libitum_fed	Singlet	neuron	magnaclass2	0	0	0	0	0	0	0	0	0	0	0	0		0	0	1	25	0	0	0	0	0	1	34	yes
adlib_Sample_3893_AT_7	CGAGTTAGTCAACACT-1	adlib	ad_libitum_fed	Singlet	neuron	magnaclass2	0	0	0	0	0	0	0	0	0	0	0	0		0	0	0	0	0	0	0	0	0	0	0	no
adlib_Sample_3893_AT_7	CGAGTTAGTGCTCTTC-1	adlib	ad_libitum_fed	Singlet	neuron	magnaclass1	0	0	0	0	0	0	0	0	0	0	0	0		0	0	0	0	0	1	35	0	0	0	0	no
adlib_Sample_3893_AT_7	CGATCGGAGAGCACTG-1	adlib	ad_libitum_fed	Singlet	neuron	magnaclass1	0	0	0	0	0	0	0	0	0	0	0	0		0	0	0	0	0	1	82	0	0	0	0	no
adlib_Sample_3893_AT_7	CGATCGGAGAGTCGAC-1	adlib	ad_libitum_fed	Singlet	neuron	magnaclass2	0	0	0	0	0	0	0	0	0	0	0	0		0	0	0	0	0	0	0	0	0	0	0	no
adlib_Sample_3893_AT_7	CGATCGGAGTTTCGGT-1	adlib	ad_libitum_fed	Singlet	neuron	magnaclass1	0	0	0	0	0	0	0	0	0	0	0	0		0	0	1	90	81	0	0	0	0	0	0	no
adlib_Sample_3893_AT_7	CGATCGGGTTTGAAAG-1	adlib	ad_libitum_fed	Singlet	neuron	magnaclass2	0	0	0	0	0	0	0	0	0	0	1	0		1	97	0	0	0	0	0	0	0	1	51	yes
adlib_Sample_3893_AT_7	CGATCGGTCGAGTCTA-1	adlib	ad_libitum_fed	Singlet	neuron	magnaclass1	0	0	0	0	0	0	0	0	0	0	0	0		0	0	1	0	82	1	85	0	0	0	0	yes
adlib_Sample_3893_AT_7	CGATGCGAGCGTCAGA-1	adlib	ad_libitum_fed	Singlet	neuron	magnaclass2	0	0	0	0	0	0	0	0	0	0	0	0		0	0	0	0	0	0	0	0	0	0	0	no
adlib_Sample_3893_AT_7	CGATGCGCAAGTGACG-1	adlib	ad_libitum_fed	Singlet	neuron	Lrmda_class	0	0	0	0	0	0	0	0	1	28	1	0		1	10	1	35	6	1	81	1	66	0	0	yes
adlib_Sample_3893_AT_7	CGATGCGCAGCGGTCT-1	adlib	ad_libitum_fed	Singlet	neuron	Lhx2_class	0	0	0	0	0	0	0	0	0	0	1	0		1	24	0	0	0	0	0	0	0	0	0	no
adlib_Sample_3893_AT_7	CGATGCGCAGTAGAAT-1	adlib	ad_libitum_fed	Singlet	neuron	magnaclass1	0	0	0	0	0	0	0	0	0	0	0	0		0	0	1	74	59	0	0	0	0	0	0	no
adlib_Sample_3893_AT_7	CGATGCGGTTCATCGA-1	adlib	ad_libitum_fed	Singlet	neuron	corelautus_class	0	0	0	0	0	0	0	0	0	0	0	0		0	0	0	0	0	0	0	0	0	0	0	no
adlib_Sample_3893_AT_7	CGATGCGTCTTGCAAG-1	adlib	ad_libitum_fed	Singlet	neuron	Lhx2_class	0	0	0	0	0	0	0	0	0	0	0	0		0	0	0	0	0	0	0	0	0	0	0	no
adlib_Sample_3893_AT_7	CGATGGCAGACTTCCA-1	adlib	ad_libitum_fed	Singlet	neuron	monoamine_class	0	0	1	93	0	0	0	0	0	0	1	0		1	57	0	0	0	0	0	0	0	0	0	yes
adlib_Sample_3893_AT_7	CGATGGCCAAATCGTC-1	adlib	ad_libitum_fed	Singlet	neuron	monoamine_class	0	0	0	0	0	0	0	0	0	0	1	0		1	93	1	0	21	0	0	0	0	0	0	yes
adlib_Sample_3893_AT_7	CGATGGCCAACCCGCA-1	adlib	ad_libitum_fed	Singlet	neuron	magnaclass1	0	0	0	0	1	22	0	0	0	0	1	0		1	6	1	91	35	1	3	0	0	1	10	yes
adlib_Sample_3893_AT_7	CGATGGCCAGCTGTCG-1	adlib	ad_libitum_fed	Singlet	neuron	Sall3_class	0	0	0	0	0	0	0	0	0	0	0	0		0	0	0	0	0	1	47	0	0	0	0	no
adlib_Sample_3893_AT_7	CGATGGCGTATCACGT-1	adlib	ad_libitum_fed	Singlet	neuron	magnaclass1	0	0	0	0	0	0	0	0	0	0	1	0		1	27	1	0	77	0	0	1	32	1	30	yes
adlib_Sample_3893_AT_7	CGATGGCGTATCCCTC-1	adlib	ad_libitum_fed	Singlet	neuron	magnaclass2	0	0	0	0	0	0	0	0	0	0	0	0		0	0	0	0	0	0	0	0	0	0	0	no
adlib_Sample_3893_AT_7	CGATGGCGTCACTACA-1	adlib	ad_libitum_fed	Singlet	neuron	corelautus_class	0	0	0	0	0	0	0	0	0	0	1	0		1	98	0	0	0	0	0	0	0	0	0	no
adlib_Sample_3893_AT_7	CGATGGCTCTTGCGCT-1	adlib	ad_libitum_fed	Singlet	neuron	magnaclass1	0	0	0	0	0	0	0	0	0	0	0	0		0	0	1	39	27	1	84	0	0	0	0	yes
adlib_Sample_3893_AT_7	CGCAGGTAGTTTCAGC-1	adlib	ad_libitum_fed	Singlet	neuron	Lhx2_class	0	0	0	0	0	0	0	0	0	0	0	0		0	0	0	0	0	0	0	0	0	0	0	no
adlib_Sample_3893_AT_7	CGCAGGTCAAGAAACT-1	adlib	ad_libitum_fed	Singlet	neuron	magnaclass2	0	0	0	0	0	0	0	0	0	0	1	0		1	10	1	9	0	0	0	0	0	0	0	yes
adlib_Sample_3893_AT_7	CGCAGGTCAGAGAATT-1	adlib	ad_libitum_fed	Singlet	neuron	magnaclass2	0	0	0	0	0	0	0	0	0	0	1	0		1	34	0	0	0	0	0	0	0	1	88	yes
adlib_Sample_3893_AT_7	CGCAGGTCATAGATGA-1	adlib	ad_libitum_fed	Singlet	neuron	magnaclass2	0	0	0	0	0	0	0	0	0	0	0	0		0	0	0	0	0	0	0	0	0	0	0	no
adlib_Sample_3893_AT_7	CGCAGGTGTAGGTGCA-1	adlib	ad_libitum_fed	Singlet	neuron	corelautus_class	0	0	0	0	0	0	0	0	0	0	0	0		0	0	0	0	0	0	0	0	0	0	0	no
adlib_Sample_3893_AT_7	CGCAGGTGTGGCAACA-1	adlib	ad_libitum_fed	Singlet	neuron	magnaclass1	0	0	0	0	0	0	0	0	0	0	1	0		1	82	0	0	0	0	0	0	0	0	0	no
adlib_Sample_3893_AT_7	CGCAGGTTCACAACCA-1	adlib	ad_libitum_fed	Singlet	neuron	corelautus_class	0	0	0	0	0	0	0	0	0	0	0	0		0	0	0	0	0	0	0	0	0	0	0	no
adlib_Sample_3893_AT_7	CGCATAAAGCTCGCAC-1	adlib	ad_libitum_fed	Singlet	neuron	magnaclass2	0	0	0	0	0	0	0	0	0	0	1	0		1	91	0	0	0	0	0	0	0	0	0	no
adlib_Sample_3893_AT_7	CGCATAACACGGAAGT-1	adlib	ad_libitum_fed	Singlet	neuron	magnaclass2	0	0	0	0	0	0	0	0	0	0	1	0		1	91	0	0	0	0	0	0	0	0	0	no
adlib_Sample_3893_AT_7	CGCATAACACTTCAGA-1	adlib	ad_libitum_fed	Singlet	neuron	monoamine_class	0	0	0	0	0	0	0	0	0	0	1	0		1	98	0	0	0	0	0	0	0	0	0	no
adlib_Sample_3893_AT_7	CGCATAACAGGCATTT-1	adlib	ad_libitum_fed	Singlet	neuron	magnaclass1	0	0	0	0	0	0	0	0	0	0	0	0		0	0	1	0	51	0	0	0	0	1	70	yes
adlib_Sample_3893_AT_7	CGCATAATCAAGCTTG-1	adlib	ad_libitum_fed	Singlet	neuron	magnaclass2	0	0	0	0	0	0	0	0	0	0	1	0		1	55	0	0	0	0	0	0	0	1	51	yes
adlib_Sample_3893_AT_7	CGCATGGAGAGAGGTA-1	adlib	ad_libitum_fed	Singlet	neuron	corelautus_class	0	0	0	0	0	0	0	0	0	0	0	0		0	0	1	0	73	1	37	0	0	1	58	yes
adlib_Sample_3893_AT_7	CGCATGGAGTCACTCA-1	adlib	ad_libitum_fed	Singlet	neuron	Sall3_class	0	0	0	0	0	0	0	0	0	0	0	0		0	0	1	0	17	1	49	1	10	0	0	yes
adlib_Sample_3893_AT_7	CGCATGGGTCACCTTC-1	adlib	ad_libitum_fed	Singlet	neuron	monoamine_class	0	0	0	0	1	31	0	0	0	0	1	0		1	11	0	0	0	0	0	0	0	0	0	yes
adlib_Sample_3893_AT_7	CGCCAGAAGAACGTGC-1	adlib	ad_libitum_fed	Singlet	neuron	magnaclass1	0	0	0	0	0	0	0	0	0	0	0	0		0	0	1	81	68	0	0	0	0	0	0	no
adlib_Sample_3893_AT_7	CGCCAGAAGCATGGGT-1	adlib	ad_libitum_fed	Singlet	neuron	Lhx2_class	0	0	0	0	0	0	0	0	0	0	0	0		0	0	0	0	0	0	0	0	0	1	88	no
adlib_Sample_3893_AT_7	CGCCAGAAGTCCTGTA-1	adlib	ad_libitum_fed	Singlet	neuron	magnaclass1	0	0	0	0	0	0	0	0	0	0	0	0		0	0	1	0	59	0	0	0	0	1	98	yes
adlib_Sample_3893_AT_7	CGCCAGAGTACTGGGA-1	adlib	ad_libitum_fed	Singlet	neuron	magnaclass1	0	0	0	0	0	0	0	0	0	0	0	0		0	0	0	0	0	0	0	0	0	0	0	no
adlib_Sample_3893_AT_7	CGCCAGAGTCACCACG-1	adlib	ad_libitum_fed	Singlet	neuron	magnaclass2	0	0	0	0	0	0	0	0	0	0	0	0		0	0	0	0	0	0	0	0	0	0	0	no
adlib_Sample_3893_AT_7	CGCCATTAGCAAGGAA-1	adlib	ad_libitum_fed	Singlet	neuron	Lrmda_class	0	0	0	0	0	0	0	0	0	0	1	0		1	50	1	0	27	0	0	0	0	0	0	yes
adlib_Sample_3893_AT_7	CGCCATTCAACGTAAA-1	adlib	ad_libitum_fed	Singlet	neuron	monoamine_class	0	0	0	0	0	0	0	0	0	0	0	0		0	0	0	0	0	0	0	0	0	1	64	no
adlib_Sample_3893_AT_7	CGCCATTCAGAGTGAC-1	adlib	ad_libitum_fed	Singlet	neuron	Sall3_class	0	0	0	0	0	0	0	0	0	0	0	0		0	0	1	0	96	0	0	0	0	0	0	no
adlib_Sample_3893_AT_7	CGCCATTGTTTGCAGT-1	adlib	ad_libitum_fed	Singlet	neuron	magnaclass1	0	0	0	0	0	0	0	0	0	0	0	0		0	0	1	0	77	1	7	0	0	0	0	yes
adlib_Sample_3893_AT_7	CGCCATTTCCGTGTGG-1	adlib	ad_libitum_fed	Singlet	neuron	magnaclass2	0	0	0	0	0	0	0	0	0	0	1	0		1	48	0	0	0	0	0	0	0	0	0	no
adlib_Sample_3893_AT_7	CGCCATTTCCTTACCG-1	adlib	ad_libitum_fed	Singlet	neuron	Lrmda_class	0	0	0	0	1	19	0	0	0	0	1	0		1	32	1	5	4	1	70	0	0	0	0	yes
adlib_Sample_3893_AT_7	CGCGTGAAGGGATCGT-1	adlib	ad_libitum_fed	Singlet	neuron	monoamine_class	0	0	0	0	0	0	0	0	0	0	0	0		0	0	1	0	88	0	0	0	0	0	0	no
adlib_Sample_3893_AT_7	CGCGTGAAGTGGATAT-1	adlib	ad_libitum_fed	Singlet	neuron	monoamine_class	0	0	0	0	0	0	0	0	0	0	0	0		0	0	0	0	0	0	0	0	0	0	0	no
adlib_Sample_3893_AT_7	CGCGTGATCAACACGT-1	adlib	ad_libitum_fed	Singlet	neuron	corelautus_class	0	0	0	0	0	0	0	0	0	0	0	0		0	0	0	0	0	0	0	0	0	1	96	no
adlib_Sample_3893_AT_7	CGCGTGATCAGAACCT-1	adlib	ad_libitum_fed	Singlet	neuron	magnaclass1	0	0	0	0	0	0	0	0	0	0	0	0		0	0	1	44	32	1	32	0	0	0	0	yes
adlib_Sample_3893_AT_7	CGGAACCAGCGCACAA-1	adlib	ad_libitum_fed	Singlet	neuron	Lrmda_class	0	0	0	0	0	0	0	0	0	0	1	0		1	73	1	10	7	1	46	0	0	0	0	yes
adlib_Sample_3893_AT_7	CGGAACCAGGCGACAT-1	adlib	ad_libitum_fed	Singlet	neuron	Sall3_class	0	0	0	0	0	0	0	0	0	0	0	0		0	0	0	0	0	0	0	0	0	0	0	no
adlib_Sample_3893_AT_7	CGGAACCGTCTTAGTG-1	adlib	ad_libitum_fed	Singlet	neuron	magnaclass1	0	0	0	0	0	0	0	0	0	0	1	0		1	84	0	0	0	1	98	0	0	0	0	yes
adlib_Sample_3893_AT_7	CGGAACCTCCGTATAG-1	adlib	ad_libitum_fed	Singlet	neuron	magnaclass1	0	0	0	0	0	0	0	0	0	0	0	0		0	0	1	0	59	1	62	0	0	0	0	yes
adlib_Sample_3893_AT_7	CGGAACCTCCTCTCGA-1	adlib	ad_libitum_fed	Singlet	neuron	magnaclass2	0	0	0	0	0	0	0	0	0	0	0	0		0	0	1	0	35	0	0	0	0	0	0	no
adlib_Sample_3893_AT_7	CGGAACCTCCTGGCTT-1	adlib	ad_libitum_fed	Singlet	neuron	magnaclass1	0	0	0	0	0	0	0	0	0	0	0	0		0	0	1	41	82	0	0	0	0	0	0	no
adlib_Sample_3893_AT_7	CGGAATTGTCCGAAAG-1	adlib	ad_libitum_fed	Singlet	neuron	magnaclass2	0	0	0	0	1	83	0	0	0	0	0	0		0	0	1	0	45	1	83	0	0	1	65	yes
adlib_Sample_3893_AT_7	CGGAATTTCGTAACAC-1	adlib	ad_libitum_fed	Singlet	neuron	monoamine_class	0	0	1	42	0	0	0	0	0	0	0	0		0	0	0	0	0	0	0	0	0	0	0	no
adlib_Sample_3893_AT_7	CGGACACAGGTGCTAG-1	adlib	ad_libitum_fed	Singlet	neuron	magnaclass2	0	0	0	0	0	0	0	0	0	0	1	0		1	71	0	0	0	1	44	0	0	1	30	yes
adlib_Sample_3893_AT_7	CGGACACCATGACTCA-1	adlib	ad_libitum_fed	Singlet	neuron	magnaclass2	0	0	0	0	0	0	0	0	0	0	0	0		0	0	0	0	0	0	0	0	0	0	0	no
adlib_Sample_3893_AT_7	CGGACACGTCGAGCTC-1	adlib	ad_libitum_fed	Singlet	neuron	magnaclass1	0	0	0	0	0	0	0	0	0	0	0	0		0	0	1	0	30	0	0	1	54	0	0	yes
adlib_Sample_3893_AT_7	CGGACACTCCACAGGC-1	adlib	ad_libitum_fed	Singlet	neuron	magnaclass1	0	0	0	0	0	0	0	0	0	0	0	0		0	0	1	81	0	0	0	0	0	1	82	yes
adlib_Sample_3893_AT_7	CGGAGAAAGCCGGATA-1	adlib	ad_libitum_fed	Singlet	neuron	magnaclass1	0	0	0	0	0	0	0	0	0	0	0	0		0	0	1	0	98	1	55	0	0	0	0	yes
adlib_Sample_3893_AT_7	CGGAGAAAGGCGACAT-1	adlib	ad_libitum_fed	Singlet	neuron	Lrmda_class	0	0	1	45	0	0	0	0	0	0	0	0		0	0	0	0	0	0	0	0	0	0	0	no
adlib_Sample_3893_AT_7	CGGAGAAGTCTCTCTG-1	adlib	ad_libitum_fed	Singlet	neuron	magnaclass2	0	0	0	0	0	0	0	0	0	0	1	0		1	47	0	0	0	0	0	0	0	0	0	no
adlib_Sample_3893_AT_7	CGGAGAAGTGTGTCGC-1	adlib	ad_libitum_fed	Singlet	neuron	monoamine_class	0	0	1	92	1	94	0	0	0	0	0	0		0	0	0	0	0	0	0	0	0	0	0	no
adlib_Sample_3893_AT_7	CGGCAGTCACAGAGAC-1	adlib	ad_libitum_fed	Singlet	neuron	magnaclass1	0	0	0	0	0	0	0	0	0	0	0	0		0	0	1	50	36	0	0	0	0	0	0	no
adlib_Sample_3893_AT_7	CGGCAGTTCGTCGATA-1	adlib	ad_libitum_fed	Singlet	neuron	Lhx2_class	0	0	0	0	0	0	0	0	0	0	0	0		0	0	0	0	0	0	0	0	0	0	0	no
adlib_Sample_3893_AT_7	CGGGACTAGGCTCAAG-1	adlib	ad_libitum_fed	Singlet	neuron	magnaclass2	0	0	0	0	0	0	0	0	0	0	0	0		0	0	0	0	0	0	0	0	0	0	0	no
adlib_Sample_3893_AT_7	CGGGACTAGTTGGAGC-1	adlib	ad_libitum_fed	Singlet	neuron	Sall3_class	0	0	0	0	0	0	0	0	0	0	0	0		0	0	1	0	70	0	0	0	0	0	0	no
adlib_Sample_3893_AT_7	CGGGACTGTCGTTATG-1	adlib	ad_libitum_fed	Singlet	neuron	monoamine_class	0	0	0	0	0	0	0	0	0	0	1	0		1	60	0	0	0	0	0	0	0	1	55	yes
adlib_Sample_3893_AT_7	CGGGACTTCGATTTCT-1	adlib	ad_libitum_fed	Singlet	neuron	magnaclass2	0	0	0	0	0	0	0	0	0	0	0	0		0	0	0	0	0	0	0	0	0	0	0	no
adlib_Sample_3893_AT_7	CGGGACTTCTGAGAAA-1	adlib	ad_libitum_fed	Singlet	neuron	magnaclass2	0	0	0	0	0	0	0	0	0	0	0	0		0	0	0	0	0	0	0	0	0	0	0	no
adlib_Sample_3893_AT_7	CGGGCATCAAGAATGT-1	adlib	ad_libitum_fed	Singlet	neuron	magnaclass1	0	0	0	0	0	0	0	0	0	0	1	0		1	87	1	0	90	1	64	0	0	0	0	yes
adlib_Sample_3893_AT_7	CGGGCATCACACGCCA-1	adlib	ad_libitum_fed	Singlet	neuron	Lrmda_class	0	0	0	0	0	0	0	0	0	0	0	0		0	0	0	0	0	1	20	0	0	0	0	no
adlib_Sample_3893_AT_7	CGGGCATCAGACATCT-1	adlib	ad_libitum_fed	Singlet	neuron	monoamine_class	0	0	0	0	0	0	0	0	0	0	0	0		0	0	1	59	0	0	0	1	67	0	0	yes
adlib_Sample_3893_AT_7	CGGGCATGTCCTCCAT-1	adlib	ad_libitum_fed	Singlet	neuron	magnaclass1	0	0	0	0	0	0	0	0	0	0	0	0		0	0	1	49	11	1	84	0	0	0	0	yes
adlib_Sample_3893_AT_7	CGGGCATGTCGTTATG-1	adlib	ad_libitum_fed	Singlet	neuron	magnaclass1	0	0	0	0	0	0	0	0	0	0	0	0		0	0	1	0	37	1	98	0	0	1	58	yes
adlib_Sample_3893_AT_7	CGGGCATTCGTTCCCA-1	adlib	ad_libitum_fed	Singlet	neuron	Lrmda_class	0	0	0	0	0	0	0	0	0	0	0	0		0	0	1	0	29	0	0	0	0	0	0	no
adlib_Sample_3893_AT_7	CGGGTCAAGCCTATTG-1	adlib	ad_libitum_fed	Singlet	neuron	magnaclass1	0	0	0	0	0	0	0	0	0	0	0	0		0	0	1	0	95	1	87	0	0	0	0	yes
adlib_Sample_3893_AT_7	CGGGTCAAGCTCCACG-1	adlib	ad_libitum_fed	Singlet	neuron	Sall3_class	0	0	0	0	0	0	0	0	0	0	0	0		0	0	0	0	0	0	0	0	0	0	0	no
adlib_Sample_3893_AT_7	CGGGTCAAGCTGTCCG-1	adlib	ad_libitum_fed	Singlet	neuron	Lrmda_class	0	0	0	0	0	0	0	0	0	0	0	0		0	0	1	98	61	1	26	0	0	0	0	yes
adlib_Sample_3893_AT_7	CGGGTCAAGTCGAGGT-1	adlib	ad_libitum_fed	Singlet	neuron	magnaclass1	0	0	0	0	0	0	0	0	0	0	1	0		1	92	1	98	0	0	0	0	0	1	83	yes
adlib_Sample_3893_AT_7	CGGGTCAAGTCTAGAA-1	adlib	ad_libitum_fed	Singlet	neuron	magnaclass1	0	0	0	0	0	0	0	0	0	0	1	0		1	59	1	46	86	0	0	0	0	0	0	yes
adlib_Sample_3893_AT_7	CGGGTCACAGATCATC-1	adlib	ad_libitum_fed	Singlet	neuron	Sall3_class	0	0	0	0	1	84	0	0	0	0	0	0		0	0	0	0	0	1	84	0	0	0	0	yes
adlib_Sample_3893_AT_7	CGGGTCAGTGTTCGAT-1	adlib	ad_libitum_fed	Singlet	neuron	magnaclass1	0	0	0	0	0	0	0	0	0	0	0	0		0	0	1	0	87	1	58	0	0	0	0	yes
adlib_Sample_3893_AT_7	CGGGTCATCATTTGTC-1	adlib	ad_libitum_fed	Singlet	neuron	monoamine_class	1	67	0	0	0	0	0	0	0	0	1	0		1	95	0	0	0	0	0	0	0	0	0	yes
adlib_Sample_3893_AT_7	CGGGTGTGTGAACCGA-1	adlib	ad_libitum_fed	Singlet	neuron	magnaclass2	0	0	0	0	0	0	0	0	0	0	0	0		0	0	0	0	0	0	0	0	0	0	0	no
adlib_Sample_3893_AT_7	CGGTCAGCAATGAAAC-1	adlib	ad_libitum_fed	Singlet	neuron	magnaclass1	0	0	0	0	0	0	0	0	0	0	0	0		0	0	1	0	95	0	0	0	0	0	0	no
adlib_Sample_3893_AT_7	CGGTCAGCATTCCTCG-1	adlib	ad_libitum_fed	Singlet	neuron	magnaclass1	0	0	0	0	0	0	0	0	0	0	0	0		0	0	0	0	0	1	97	0	0	0	0	no
adlib_Sample_3893_AT_7	CGGTCAGTCTTCTGGC-1	adlib	ad_libitum_fed	Singlet	neuron	magnaclass2	0	0	0	0	1	67	0	0	0	0	1	0		1	48	0	0	0	1	25	0	0	0	0	yes
adlib_Sample_3893_AT_7	CGTAAGTAGGCACTCC-1	adlib	ad_libitum_fed	Singlet	neuron	magnaclass1	0	0	0	0	0	0	0	0	0	0	0	0		0	0	1	94	0	0	0	0	0	0	0	no
adlib_Sample_3893_AT_7	CGTAAGTAGTCTAGAA-1	adlib	ad_libitum_fed	Singlet	neuron	monoamine_class	0	0	0	0	0	0	0	0	0	0	0	0		0	0	0	0	0	0	0	1	99	0	0	no
adlib_Sample_3893_AT_7	CGTAAGTGTCCGACGT-1	adlib	ad_libitum_fed	Singlet	neuron	monoamine_class	0	0	1	78	1	63	0	0	0	0	0	0		0	0	0	0	0	0	0	0	0	0	0	no
adlib_Sample_3893_AT_7	CGTAAGTGTGAGCTCC-1	adlib	ad_libitum_fed	Singlet	neuron	magnaclass1	0	0	0	0	0	0	0	0	0	0	1	0		1	48	0	0	0	1	26	0	0	0	0	yes
adlib_Sample_3893_AT_7	CGTAAGTTCCATCTAT-1	adlib	ad_libitum_fed	Singlet	neuron	magnaclass1	0	0	0	0	0	0	0	0	0	0	0	0		0	0	1	0	43	1	43	0	0	0	0	yes
adlib_Sample_3893_AT_7	CGTAAGTTCTACGGTA-1	adlib	ad_libitum_fed	Singlet	neuron	monoamine_class	0	0	0	0	0	0	0	0	0	0	1	0		1	36	0	0	0	0	0	0	0	0	0	no
adlib_Sample_3893_AT_7	CGTAATGAGGCCCAAA-1	adlib	ad_libitum_fed	Singlet	neuron	magnaclass1	0	0	0	0	0	0	0	0	0	0	1	0		1	46	1	0	24	0	0	0	0	0	0	yes
adlib_Sample_3893_AT_7	CGTAATGCAAGTTGGG-1	adlib	ad_libitum_fed	Singlet	neuron	magnaclass1	0	0	0	0	0	0	0	0	0	0	1	0		1	90	1	80	67	0	0	0	0	1	81	yes
adlib_Sample_3893_AT_7	CGTAATGCACCAGTTA-1	adlib	ad_libitum_fed	Singlet	neuron	magnaclass2	0	0	0	0	0	0	0	0	0	0	0	0		0	0	0	0	0	0	0	0	0	0	0	no
adlib_Sample_3893_AT_7	CGTAATGTCTTGGGCG-1	adlib	ad_libitum_fed	Singlet	neuron	magnaclass2	0	0	0	0	0	0	0	0	0	0	1	0		1	99	0	0	0	0	0	0	0	0	0	no
adlib_Sample_3893_AT_7	CGTAGTACATCGATAC-1	adlib	ad_libitum_fed	Singlet	neuron	Lrmda_class	0	0	0	0	0	0	0	0	0	0	0	0		0	0	0	0	0	1	21	0	0	0	0	no
adlib_Sample_3893_AT_7	CGTAGTAGTGTTATCG-1	adlib	ad_libitum_fed	Singlet	neuron	Sall3_class	0	0	0	0	0	0	0	0	0	0	0	0		0	0	1	72	24	0	0	0	0	0	0	no
adlib_Sample_3893_AT_7	CGTCAAAAGAGTGAAG-1	adlib	ad_libitum_fed	Singlet	neuron	magnaclass1	0	0	0	0	0	0	0	0	0	0	1	0		1	68	1	55	76	0	0	0	0	0	0	yes
adlib_Sample_3893_AT_7	CGTCAAAAGCCATGCC-1	adlib	ad_libitum_fed	Singlet	neuron	Lrmda_class	0	0	0	0	0	0	0	0	0	0	1	0		1	3	1	0	12	1	51	0	0	0	0	yes
adlib_Sample_3893_AT_7	CGTCAAAAGGAAGTCC-1	adlib	ad_libitum_fed	Singlet	neuron	magnaclass1	0	0	0	0	0	0	0	0	0	0	0	0		0	0	1	0	96	0	0	0	0	0	0	no
adlib_Sample_3893_AT_7	CGTCAAAAGTTTCGAC-1	adlib	ad_libitum_fed	Singlet	neuron	monoamine_class	0	0	0	0	0	0	0	0	0	0	0	0		0	0	0	0	0	0	0	0	0	0	0	no
adlib_Sample_3893_AT_7	CGTCAAACAGGACAGT-1	adlib	ad_libitum_fed	Singlet	neuron	monoamine_class	0	0	0	0	0	0	0	0	0	0	0	0		0	0	0	0	0	0	0	0	0	0	0	no
adlib_Sample_3893_AT_7	CGTCAAAGTAAGTTGA-1	adlib	ad_libitum_fed	Singlet	neuron	magnaclass2	0	0	0	0	0	0	0	0	0	0	1	1		1	78	1	0	4	0	0	1	12	0	0	yes
adlib_Sample_3893_AT_7	CGTCAAAGTACTCAAC-1	adlib	ad_libitum_fed	Singlet	neuron	magnaclass2	0	0	0	0	1	89	0	0	0	0	0	0		0	0	0	0	0	0	0	0	0	1	74	yes
adlib_Sample_3893_AT_7	CGTCAAATCTATACGG-1	adlib	ad_libitum_fed	Singlet	neuron	magnaclass1	0	0	0	0	0	0	0	0	0	0	0	0		0	0	1	0	72	0	0	0	0	1	100	yes
adlib_Sample_3893_AT_7	CGTCCATAGCGCACAA-1	adlib	ad_libitum_fed	Singlet	neuron	magnaclass1	0	0	0	0	0	0	0	0	0	0	1	0		1	24	1	54	39	1	40	0	0	0	0	yes
adlib_Sample_3893_AT_7	CGTCCATAGTCGCCAC-1	adlib	ad_libitum_fed	Singlet	neuron	magnaclass1	0	0	0	0	1	70	0	0	0	0	0	0		0	0	1	41	82	1	28	0	0	0	0	yes
adlib_Sample_3893_AT_7	CGTCCATCACCTGAAT-1	adlib	ad_libitum_fed	Singlet	neuron	magnaclass1	0	0	0	0	0	0	0	0	0	0	1	0		1	60	1	47	69	1	34	0	0	0	0	yes
adlib_Sample_3893_AT_7	CGTCCATGTCCGCAGT-1	adlib	ad_libitum_fed	Singlet	neuron	magnaclass2	0	0	0	0	0	0	0	0	0	0	1	0		1	75	0	0	0	0	0	0	0	0	0	no
adlib_Sample_3893_AT_7	CGTGAATCAGCTACAT-1	adlib	ad_libitum_fed	Singlet	neuron	magnaclass1	0	0	0	0	0	0	0	0	0	0	1	0		1	37	0	0	0	0	0	0	0	0	0	no
adlib_Sample_3893_AT_7	CGTGAATGTATGTCTG-1	adlib	ad_libitum_fed	Singlet	neuron	magnaclass1	0	0	0	0	0	0	0	0	0	0	1	0		1	55	1	79	0	1	68	1	82	0	0	yes
adlib_Sample_3893_AT_7	CGTGATACACGCAAAG-1	adlib	ad_libitum_fed	Singlet	neuron	magnaclass2	0	0	0	0	0	0	0	0	0	0	0	0		0	0	0	0	0	0	0	1	53	0	0	no
adlib_Sample_3893_AT_7	CGTGATAGTCTGTGGC-1	adlib	ad_libitum_fed	Singlet	neuron	magnaclass1	0	0	0	0	0	0	0	0	0	0	0	0		0	0	1	0	46	1	46	1	89	0	0	yes
adlib_Sample_3893_AT_7	CGTGCTTTCATAGGCT-1	adlib	ad_libitum_fed	Singlet	neuron	Lrmda_class	0	0	0	0	0	0	0	0	0	0	1	0		1	46	0	0	0	1	61	0	0	0	0	yes
adlib_Sample_3893_AT_7	CGTGCTTTCATTACGG-1	adlib	ad_libitum_fed	Singlet	neuron	monoamine_class	0	0	0	0	0	0	0	0	0	0	0	0		0	0	0	0	0	0	0	0	0	0	0	no
adlib_Sample_3893_AT_7	CGTGCTTTCGAGTGAG-1	adlib	ad_libitum_fed	Singlet	neuron	magnaclass2	0	0	0	0	0	0	0	0	0	0	0	0		0	0	0	0	0	0	0	0	0	1	41	no
adlib_Sample_3893_AT_7	CGTGTCTCACATGACT-1	adlib	ad_libitum_fed	Singlet	neuron	Lrmda_class	0	0	0	0	0	0	0	0	0	0	0	0		0	0	0	0	0	0	0	0	0	0	0	no
adlib_Sample_3893_AT_7	CGTGTCTGTCGCGGTT-1	adlib	ad_libitum_fed	Singlet	neuron	magnaclass2	0	0	0	0	0	0	0	0	0	0	0	0		0	0	0	0	0	0	0	0	0	0	0	no
adlib_Sample_3893_AT_7	CGTGTCTTCACCGGGT-1	adlib	ad_libitum_fed	Singlet	neuron	monoamine_class	0	0	0	0	0	0	0	0	0	0	0	0		0	0	0	0	0	0	0	0	0	0	0	no
adlib_Sample_3893_AT_7	CGTGTCTTCGCAGTCG-1	adlib	ad_libitum_fed	Singlet	neuron	magnaclass1	0	0	0	0	0	0	0	0	0	0	1	0		1	84	1	0	99	0	0	0	0	0	0	yes
adlib_Sample_3893_AT_7	CGTTAGAAGGTAAAGG-1	adlib	ad_libitum_fed	Singlet	neuron	magnaclass1	0	0	0	0	0	0	0	0	0	0	0	0		0	0	1	0	60	1	63	1	79	0	0	yes
adlib_Sample_3893_AT_7	CGTTAGAGTAACCCTA-1	adlib	ad_libitum_fed	Singlet	neuron	corelautus_class	0	0	0	0	0	0	0	0	0	0	0	0		0	0	0	0	0	0	0	0	0	0	0	no
adlib_Sample_3893_AT_7	CGTTAGAGTAGGAAAG-1	adlib	ad_libitum_fed	Singlet	neuron	magnaclass2	0	0	0	0	0	0	0	0	0	0	0	0		0	0	0	0	0	0	0	0	0	0	0	no
adlib_Sample_3893_AT_7	CGTTAGATCATGAGGG-1	adlib	ad_libitum_fed	Singlet	neuron	Lhx2_class	0	0	0	0	0	0	0	0	0	0	0	0		0	0	0	0	0	1	93	0	0	0	0	no
adlib_Sample_3893_AT_7	CGTTAGATCGCAGAGA-1	adlib	ad_libitum_fed	Singlet	neuron	magnaclass1	0	0	0	0	0	0	0	0	0	0	1	0		1	93	1	0	73	0	0	0	0	0	0	yes
adlib_Sample_3893_AT_7	CGTTCTGAGCCTGAGA-1	adlib	ad_libitum_fed	Singlet	neuron	magnaclass1	0	0	0	0	0	0	0	0	0	0	0	0		0	0	1	75	90	0	0	0	0	0	0	no
adlib_Sample_3893_AT_7	CGTTCTGAGGTCATCT-1	adlib	ad_libitum_fed	Singlet	neuron	magnaclass1	0	0	0	0	0	0	0	0	0	0	0	0		0	0	1	0	98	0	0	0	0	0	0	no
adlib_Sample_3893_AT_7	CGTTCTGCAACTTCTT-1	adlib	ad_libitum_fed	Singlet	neuron	monoamine_class	0	0	0	0	0	0	0	0	0	0	1	0		1	27	0	0	0	0	0	0	0	0	0	no
adlib_Sample_3893_AT_7	CGTTCTGGTAGTTCCA-1	adlib	ad_libitum_fed	Singlet	neuron	magnaclass1	0	0	0	0	0	0	0	0	0	0	1	0		1	95	1	35	78	0	0	0	0	0	0	yes
adlib_Sample_3893_AT_7	CGTTCTGGTCGAATGG-1	adlib	ad_libitum_fed	Singlet	neuron	monoamine_class	0	0	0	0	0	0	0	0	0	0	0	0		0	0	0	0	0	0	0	0	0	0	0	no
adlib_Sample_3893_AT_7	CGTTCTGGTGCTGCAC-1	adlib	ad_libitum_fed	Singlet	neuron	Lhx2_class	0	0	0	0	0	0	0	0	0	0	1	0		1	40	0	0	0	0	0	0	0	0	0	no
adlib_Sample_3893_AT_7	CGTTGGGCAATTGTGC-1	adlib	ad_libitum_fed	Singlet	neuron	Lhx2_class	0	0	0	0	0	0	0	0	0	0	0	0		0	0	0	0	0	0	0	0	0	1	71	no
adlib_Sample_3893_AT_7	CGTTGGGCATTGTAGC-1	adlib	ad_libitum_fed	Singlet	neuron	magnaclass2	0	0	0	0	0	0	0	0	0	0	1	0		1	94	1	0	39	0	0	0	0	0	0	yes
adlib_Sample_3893_AT_7	CGTTGGGGTCGGCCTA-1	adlib	ad_libitum_fed	Singlet	neuron	monoamine_class	0	0	0	0	0	0	0	0	0	0	0	0		0	0	0	0	0	0	0	0	0	0	0	no
adlib_Sample_3893_AT_7	CGTTGGGGTGGAAATT-1	adlib	ad_libitum_fed	Singlet	neuron	Lhx2_class	0	0	0	0	0	0	0	0	0	0	0	0		0	0	0	0	0	0	0	0	0	1	28	no
adlib_Sample_3893_AT_7	CGTTGGGTCGACCTAA-1	adlib	ad_libitum_fed	Singlet	neuron	Lrmda_class	0	0	0	0	0	0	0	0	0	0	1	0		1	21	0	0	0	1	59	0	0	0	0	yes
adlib_Sample_3893_AT_7	CTAACCCAGCAGCCTC-1	adlib	ad_libitum_fed	Singlet	neuron	Sall3_class	0	0	0	0	0	0	0	0	0	0	1	0		1	41	1	8	0	1	4	0	0	0	0	yes
adlib_Sample_3893_AT_7	CTAACCCCAACTCCAA-1	adlib	ad_libitum_fed	Singlet	neuron	Lrmda_class	0	0	0	0	0	0	0	0	0	0	1	0		1	42	1	0	5	1	69	0	0	0	0	yes
adlib_Sample_3893_AT_7	CTAACCCTCTTTGCGC-1	adlib	ad_libitum_fed	Singlet	neuron	Lrmda_class	0	0	0	0	0	0	0	0	0	0	0	0		0	0	1	0	31	1	30	0	0	0	0	yes
adlib_Sample_3893_AT_7	CTAACTTAGATGTAGT-1	adlib	ad_libitum_fed	Singlet	neuron	magnaclass2	1	73	0	0	0	0	0	0	0	0	0	0		0	0	1	0	47	0	0	0	0	0	0	yes
adlib_Sample_3893_AT_7	CTAACTTAGGTACAAT-1	adlib	ad_libitum_fed	Singlet	neuron	monoamine_class	0	0	1	64	0	0	0	0	0	0	1	0		1	42	0	0	0	0	0	1	44	0	0	yes
adlib_Sample_3893_AT_7	CTAACTTAGTACGAGC-1	adlib	ad_libitum_fed	Singlet	neuron	Sall3_class	0	0	0	0	0	0	0	0	0	0	0	0		0	0	0	0	0	0	0	1	29	1	60	yes
adlib_Sample_3893_AT_7	CTAACTTAGTGCCTCG-1	adlib	ad_libitum_fed	Singlet	neuron	magnaclass2	0	0	0	0	0	0	0	0	0	0	1	0		1	6	0	0	0	0	0	0	0	0	0	no
adlib_Sample_3893_AT_7	CTAACTTCAGGATTCT-1	adlib	ad_libitum_fed	Singlet	neuron	Lhx2_class	0	0	0	0	0	0	0	0	0	0	0	0		0	0	0	0	0	0	0	0	0	0	0	no
adlib_Sample_3893_AT_7	CTAACTTCATCTTCGC-1	adlib	ad_libitum_fed	Singlet	neuron	magnaclass1	0	0	0	0	0	0	0	0	0	0	1	0		1	38	1	0	91	1	19	1	41	0	0	yes
adlib_Sample_3893_AT_7	CTAACTTCATTCATCT-1	adlib	ad_libitum_fed	Singlet	neuron	magnaclass1	0	0	0	0	0	0	0	0	0	0	0	0		0	0	1	0	55	0	0	0	0	0	0	no
adlib_Sample_3893_AT_7	CTAACTTGTAGTACGG-1	adlib	ad_libitum_fed	Singlet	neuron	magnaclass1	1	83	0	0	0	0	0	0	0	0	1	0		1	45	1	0	24	0	0	0	0	0	0	yes
adlib_Sample_3893_AT_7	CTAACTTTCGGTCTGG-1	adlib	ad_libitum_fed	Singlet	neuron	magnaclass2	0	0	0	0	1	33	0	0	0	0	0	0		0	0	0	0	0	1	6	0	0	1	18	yes
adlib_Sample_3893_AT_7	CTAACTTTCTCCGAAA-1	adlib	ad_libitum_fed	Singlet	neuron	magnaclass1	0	0	0	0	0	0	0	0	0	0	1	0		1	49	1	75	90	1	26	0	0	0	0	yes
adlib_Sample_3893_AT_7	CTAAGTGCACCACATA-1	adlib	ad_libitum_fed	Singlet	neuron	magnaclass2	0	0	0	0	0	0	0	0	0	0	0	0		0	0	0	0	0	0	0	0	0	1	51	no
adlib_Sample_3893_AT_7	CTAAGTGTCCTTACCG-1	adlib	ad_libitum_fed	Singlet	neuron	monoamine_class	0	0	0	0	1	81	0	0	0	0	1	0		1	69	0	0	0	0	0	0	0	0	0	yes
adlib_Sample_3893_AT_7	CTACAGAAGTCTGTAC-1	adlib	ad_libitum_fed	Singlet	neuron	magnaclass2	0	0	0	0	0	0	0	0	0	0	0	0		0	0	0	0	0	0	0	0	0	0	0	no
adlib_Sample_3893_AT_7	CTACAGAAGTGAATAC-1	adlib	ad_libitum_fed	Singlet	neuron	monoamine_class	0	0	0	0	0	0	0	0	0	0	0	0		0	0	0	0	0	0	0	0	0	0	0	no
adlib_Sample_3893_AT_7	CTACAGAAGTTACTCG-1	adlib	ad_libitum_fed	Singlet	neuron	magnaclass1	0	0	0	0	0	0	0	0	0	0	0	0		0	0	1	80	93	0	0	0	0	0	0	no
adlib_Sample_3893_AT_7	CTACAGACATTGAAAG-1	adlib	ad_libitum_fed	Singlet	neuron	magnaclass2	0	0	0	0	0	0	0	0	0	0	0	0		0	0	0	0	0	0	0	0	0	0	0	no
adlib_Sample_3893_AT_7	CTACAGATCGACGAGA-1	adlib	ad_libitum_fed	Singlet	neuron	monoamine_class	0	0	1	34	0	0	0	0	0	0	1	0		1	43	0	0	0	0	0	0	0	0	0	yes
adlib_Sample_3893_AT_7	CTACAGATCGTGGCTG-1	adlib	ad_libitum_fed	Singlet	neuron	magnaclass1	0	0	0	0	1	98	0	0	0	0	0	0		0	0	1	0	98	0	0	0	0	0	0	yes
adlib_Sample_3893_AT_7	CTACATTAGGTAACTA-1	adlib	ad_libitum_fed	Singlet	neuron	magnaclass1	0	0	0	0	0	0	0	0	0	0	1	0		1	22	1	17	82	1	60	0	0	0	0	yes
adlib_Sample_3893_AT_7	CTACATTAGTATCTGC-1	adlib	ad_libitum_fed	Singlet	neuron	magnaclass2	0	0	0	0	0	0	0	0	0	0	0	0		0	0	1	0	32	0	0	0	0	1	81	yes
adlib_Sample_3893_AT_7	CTACATTAGTTGGCTT-1	adlib	ad_libitum_fed	Singlet	neuron	magnaclass2	0	0	0	0	0	0	0	0	0	0	1	0		1	28	0	0	0	0	0	1	8	0	0	yes
adlib_Sample_3893_AT_7	CTACCCAAGGTTACAA-1	adlib	ad_libitum_fed	Singlet	neuron	magnaclass1	0	0	0	0	0	0	0	0	0	0	0	0		0	0	1	37	26	1	63	0	0	0	0	yes
adlib_Sample_3893_AT_7	CTACCCAGTGACACAG-1	adlib	ad_libitum_fed	Singlet	neuron	magnaclass2	0	0	0	0	0	0	0	0	0	0	1	0		1	93	0	0	0	0	0	0	0	0	0	no
adlib_Sample_3893_AT_7	CTACCTGAGAGAAGGT-1	adlib	ad_libitum_fed	Singlet	neuron	Lrmda_class	0	0	0	0	0	0	0	0	0	0	0	0		0	0	0	0	0	0	0	0	0	0	0	no
adlib_Sample_3893_AT_7	CTACCTGAGCCGGATA-1	adlib	ad_libitum_fed	Singlet	neuron	magnaclass2	0	0	0	0	0	0	0	0	0	0	0	0		0	0	0	0	0	0	0	0	0	0	0	no
adlib_Sample_3893_AT_7	CTACCTGCAACATACC-1	adlib	ad_libitum_fed	Singlet	neuron	monoamine_class	0	0	1	15	0	0	0	0	0	0	1	0		1	54	0	0	0	0	0	0	0	0	0	yes
adlib_Sample_3893_AT_7	CTACCTGTCGTGGCGT-1	adlib	ad_libitum_fed	Singlet	neuron	magnaclass1	0	0	0	0	0	0	0	0	0	0	1	0		1	62	0	0	0	0	0	0	0	0	0	no
adlib_Sample_3893_AT_7	CTACCTGTCTGAGTCA-1	adlib	ad_libitum_fed	Singlet	neuron	magnaclass2	0	0	0	0	0	0	0	0	0	0	0	0		0	0	0	0	0	0	0	0	0	0	0	no
adlib_Sample_3893_AT_7	CTACCTGTCTTGTTAC-1	adlib	ad_libitum_fed	Singlet	neuron	Lhx2_class	0	0	0	0	0	0	0	0	0	0	0	0		0	0	0	0	0	0	0	0	0	1	78	no
adlib_Sample_3893_AT_7	CTACGGGCATATACCG-1	adlib	ad_libitum_fed	Singlet	neuron	magnaclass1	0	0	0	0	0	0	0	0	0	0	0	0		0	0	1	0	44	1	45	0	0	0	0	yes
adlib_Sample_3893_AT_7	CTACGGGGTCCAACGC-1	adlib	ad_libitum_fed	Singlet	neuron	Lhx2_class	0	0	0	0	0	0	0	0	0	0	0	0		0	0	0	0	0	1	22	0	0	0	0	no
adlib_Sample_3893_AT_7	CTACTATAGATCCCAT-1	adlib	ad_libitum_fed	Singlet	neuron	magnaclass1	0	0	0	0	0	0	0	0	0	0	0	0		0	0	1	0	63	0	0	0	0	0	0	no
adlib_Sample_3893_AT_7	CTACTATCAATTGAAG-1	adlib	ad_libitum_fed	Singlet	neuron	magnaclass1	0	0	0	0	0	0	0	0	0	0	0	0		0	0	1	69	96	0	0	0	0	0	0	no
adlib_Sample_3893_AT_7	CTACTATCAGCTTCGG-1	adlib	ad_libitum_fed	Singlet	neuron	monoamine_class	0	0	0	0	0	0	0	0	0	0	1	0		1	84	0	0	0	1	23	0	0	0	0	yes
adlib_Sample_3893_AT_7	CTACTATTCGTAGTGT-1	adlib	ad_libitum_fed	Singlet	neuron	magnaclass1	0	0	0	0	0	0	0	0	0	0	0	0		0	0	1	0	42	0	0	0	0	1	62	yes
adlib_Sample_3893_AT_7	CTAGACAAGGCCTGAA-1	adlib	ad_libitum_fed	Singlet	neuron	Lrmda_class	0	0	0	0	0	0	0	0	0	0	1	0		1	63	0	0	0	1	9	0	0	0	0	yes
adlib_Sample_3893_AT_7	CTAGACAGTAAGGTCG-1	adlib	ad_libitum_fed	Singlet	neuron	magnaclass1	0	0	0	0	0	0	0	0	0	0	0	0		0	0	1	76	62	1	27	0	0	0	0	yes
adlib_Sample_3893_AT_7	CTAGACAGTCTTCTAT-1	adlib	ad_libitum_fed	Singlet	neuron	monoamine_class	0	0	0	0	1	67	0	0	0	0	1	0		1	11	0	0	0	0	0	0	0	0	0	yes
adlib_Sample_3893_AT_7	CTAGACATCACACCGG-1	adlib	ad_libitum_fed	Singlet	neuron	magnaclass1	0	0	0	0	0	0	0	0	0	0	0	0		0	0	0	0	0	1	89	0	0	0	0	no
adlib_Sample_3893_AT_7	CTAGACATCATGCATG-1	adlib	ad_libitum_fed	Singlet	neuron	magnaclass1	0	0	0	0	0	0	0	0	0	0	0	0		0	0	1	85	52	1	19	0	0	0	0	yes
adlib_Sample_3893_AT_7	CTAGACATCCGTACGG-1	adlib	ad_libitum_fed	Singlet	neuron	magnaclass1	0	0	0	0	0	0	0	0	0	0	0	0		0	0	1	59	0	1	14	0	0	0	0	yes
adlib_Sample_3893_AT_7	CTAGACATCCTCGATC-1	adlib	ad_libitum_fed	Singlet	neuron	Lrmda_class	0	0	0	0	0	0	0	0	0	0	1	0		1	39	0	0	0	1	61	0	0	0	0	yes
adlib_Sample_3893_AT_7	CTAGACATCTATACGG-1	adlib	ad_libitum_fed	Singlet	neuron	monoamine_class	0	0	0	0	0	0	0	0	0	0	0	0		0	0	1	0	21	0	0	0	0	0	0	no
adlib_Sample_3893_AT_7	CTAGGTAAGCCTGTCG-1	adlib	ad_libitum_fed	Singlet	neuron	Sall3_class	0	0	0	0	0	0	0	0	0	0	0	0		0	0	1	0	61	0	0	0	0	0	0	no
adlib_Sample_3893_AT_7	CTAGGTAAGGTCGTAG-1	adlib	ad_libitum_fed	Singlet	neuron	Lrmda_class	0	0	0	0	0	0	0	0	0	0	0	0		0	0	0	0	0	1	53	0	0	1	70	yes
adlib_Sample_3893_AT_7	CTAGGTACAAGATCCT-1	adlib	ad_libitum_fed	Singlet	neuron	Sall3_class	0	0	0	0	0	0	0	0	0	0	1	0		1	33	1	0	68	1	16	1	83	1	34	yes
adlib_Sample_3893_AT_7	CTAGGTACACAAGCAG-1	adlib	ad_libitum_fed	Singlet	neuron	magnaclass1	0	0	0	0	0	0	0	0	0	0	1	0		1	38	1	77	51	1	19	1	12	0	0	yes
adlib_Sample_3893_AT_7	CTAGGTACACAGACGA-1	adlib	ad_libitum_fed	Singlet	neuron	monoamine_class	0	0	1	81	0	0	0	0	0	0	1	0		1	77	1	0	49	0	0	0	0	1	68	yes
adlib_Sample_3893_AT_7	CTAGGTAGTTGGAGAC-1	adlib	ad_libitum_fed	Singlet	neuron	magnaclass1	0	0	0	0	0	0	0	0	0	0	0	0		0	0	1	81	0	0	0	0	0	0	0	no
adlib_Sample_3893_AT_7	CTAGGTATCAACTACG-1	adlib	ad_libitum_fed	Singlet	neuron	magnaclass2	0	0	0	0	0	0	0	0	0	0	0	0		0	0	0	0	0	0	0	1	18	0	0	no
adlib_Sample_3893_AT_7	CTAGGTATCGGACCAC-1	adlib	ad_libitum_fed	Singlet	neuron	Lhx2_class	0	0	0	0	0	0	0	0	0	0	1	1		1	85	1	36	0	0	0	0	0	0	0	yes
adlib_Sample_3893_AT_7	CTATAGGAGAGAAGGT-1	adlib	ad_libitum_fed	Singlet	neuron	magnaclass2	0	0	0	0	0	0	0	0	0	0	0	0		0	0	0	0	0	0	0	0	0	1	87	no
adlib_Sample_3893_AT_7	CTATAGGCACACACTA-1	adlib	ad_libitum_fed	Singlet	neuron	magnaclass2	0	0	0	0	1	15	0	0	0	0	1	0		1	3	0	0	0	0	0	0	0	0	0	yes
adlib_Sample_3893_AT_7	CTATAGGCACACGTGC-1	adlib	ad_libitum_fed	Singlet	neuron	magnaclass1	0	0	0	0	0	0	0	0	0	0	0	0		0	0	1	65	50	1	96	0	0	0	0	yes
adlib_Sample_3893_AT_7	CTATAGGCACTACAGT-1	adlib	ad_libitum_fed	Singlet	neuron	Lhx2_class	0	0	0	0	0	0	0	0	0	0	1	0		1	53	0	0	0	0	0	0	0	0	0	no
adlib_Sample_3893_AT_7	CTATAGGGTCTCACAA-1	adlib	ad_libitum_fed	Singlet	neuron	magnaclass1	0	0	0	0	0	0	0	0	0	0	1	0		1	83	1	33	23	0	0	0	0	0	0	yes
adlib_Sample_3893_AT_7	CTATAGGGTTGGTAGG-1	adlib	ad_libitum_fed	Singlet	neuron	magnaclass2	0	0	0	0	1	95	0	0	0	0	1	0		1	71	0	0	0	0	0	0	0	0	0	yes
adlib_Sample_3893_AT_7	CTATAGGTCACCTACC-1	adlib	ad_libitum_fed	Singlet	neuron	magnaclass2	0	0	0	0	1	57	0	0	0	0	1	0		1	36	0	0	0	0	0	0	0	0	0	yes
adlib_Sample_3893_AT_7	CTATCCGAGCCTCATA-1	adlib	ad_libitum_fed	Singlet	neuron	Lrmda_class	0	0	0	0	0	0	0	0	0	0	1	0		1	36	1	28	0	1	74	0	0	0	0	yes
adlib_Sample_3893_AT_7	CTATCCGAGCTAAGTA-1	adlib	ad_libitum_fed	Singlet	neuron	magnaclass1	0	0	0	0	0	0	0	0	0	0	0	0		0	0	1	75	61	0	0	0	0	1	88	yes
adlib_Sample_3893_AT_7	CTATCCGAGCTGACAG-1	adlib	ad_libitum_fed	Singlet	neuron	magnaclass1	0	0	0	0	0	0	0	0	0	0	0	0		0	0	1	0	67	0	0	0	0	0	0	no
adlib_Sample_3893_AT_7	CTATCCGCATGAGTAA-1	adlib	ad_libitum_fed	Singlet	neuron	Lrmda_class	0	0	0	0	0	0	0	0	0	0	0	0		0	0	1	0	29	1	43	0	0	0	0	yes
adlib_Sample_3893_AT_7	CTATCCGTCGGAAACG-1	adlib	ad_libitum_fed	Singlet	neuron	monoamine_class	1	56	1	90	0	0	1	50	0	0	0	0		0	0	1	0	33	0	0	0	0	1	54	yes
adlib_Sample_3893_AT_7	CTATCTAAGGAAAGAC-1	adlib	ad_libitum_fed	Singlet	neuron	magnaclass2	0	0	0	0	0	0	0	0	0	0	0	0		0	0	0	0	0	0	0	0	0	1	81	no
adlib_Sample_3893_AT_7	CTATCTAAGTACAGAT-1	adlib	ad_libitum_fed	Singlet	neuron	magnaclass2	0	0	0	0	0	0	0	0	0	0	1	0		1	99	0	0	0	0	0	0	0	0	0	no
adlib_Sample_3893_AT_7	CTATCTAAGTGCACTT-1	adlib	ad_libitum_fed	Singlet	neuron	magnaclass1	0	0	0	0	0	0	0	0	0	0	0	0		0	0	0	0	0	0	0	0	0	1	60	no
adlib_Sample_3893_AT_7	CTATCTACAAAGCTAA-1	adlib	ad_libitum_fed	Singlet	neuron	magnaclass1	0	0	0	0	0	0	0	0	0	0	1	0		1	91	1	62	17	0	0	0	0	0	0	yes
adlib_Sample_3893_AT_7	CTATCTACACTGCATA-1	adlib	ad_libitum_fed	Singlet	neuron	Lhx2_class	0	0	0	0	0	0	0	0	0	0	1	0		1	48	0	0	0	0	0	0	0	0	0	no
adlib_Sample_3893_AT_7	CTATCTACATCCGATA-1	adlib	ad_libitum_fed	Singlet	neuron	magnaclass1	0	0	0	0	0	0	0	0	0	0	1	0		1	48	1	10	7	1	25	0	0	1	16	yes
adlib_Sample_3893_AT_7	CTATCTATCCGTGTGG-1	adlib	ad_libitum_fed	Singlet	neuron	monoamine_class	0	0	0	0	0	0	0	0	0	0	1	0		1	51	0	0	0	0	0	1	51	0	0	yes
adlib_Sample_3893_AT_7	CTATCTATCTTTACAC-1	adlib	ad_libitum_fed	Singlet	neuron	magnaclass2	0	0	0	0	0	0	0	0	0	0	1	0		1	48	0	0	0	0	0	1	17	0	0	yes
adlib_Sample_3893_AT_7	CTCAACCGTCACAGTT-1	adlib	ad_libitum_fed	Singlet	neuron	magnaclass2	0	0	0	0	0	0	0	0	0	0	1	0		1	6	0	0	0	0	0	0	0	1	10	yes
adlib_Sample_3893_AT_7	CTCAACCGTCTGTCAA-1	adlib	ad_libitum_fed	Singlet	neuron	magnaclass1	0	0	0	0	0	0	0	0	0	0	1	0		1	32	1	25	67	1	71	0	0	0	0	yes
adlib_Sample_3893_AT_7	CTCAACCTCATCAGTG-1	adlib	ad_libitum_fed	Singlet	neuron	magnaclass2	0	0	0	0	0	0	0	0	0	0	1	0		1	37	0	0	0	0	0	0	0	1	37	yes
adlib_Sample_3893_AT_7	CTCAACCTCCTCACCA-1	adlib	ad_libitum_fed	Singlet	neuron	magnaclass1	0	0	0	0	1	43	0	0	0	0	0	0		0	0	1	17	82	0	0	0	0	0	0	yes
adlib_Sample_3893_AT_7	CTCAAGAAGAATCGAT-1	adlib	ad_libitum_fed	Singlet	neuron	monoamine_class	0	0	0	0	0	0	0	0	0	0	0	0		0	0	0	0	0	0	0	0	0	1	70	no
adlib_Sample_3893_AT_7	CTCAAGAGTAGAGGAA-1	adlib	ad_libitum_fed	Singlet	neuron	magnaclass2	0	0	0	0	0	0	0	0	0	0	1	1		1	97	0	0	0	0	0	0	0	0	0	no
adlib_Sample_3893_AT_7	CTCAAGAGTTTAGTCG-1	adlib	ad_libitum_fed	Singlet	neuron	magnaclass1	0	0	0	0	0	0	0	0	0	0	0	0		0	0	0	0	0	0	0	0	0	0	0	no
adlib_Sample_3893_AT_7	CTCAAGATCCGATAAC-1	adlib	ad_libitum_fed	Singlet	neuron	magnaclass1	0	0	0	0	0	0	0	0	0	0	0	0		0	0	1	0	47	1	48	0	0	0	0	yes
adlib_Sample_3893_AT_7	CTCAAGATCTTCCAGC-1	adlib	ad_libitum_fed	Singlet	neuron	magnaclass2	0	0	0	0	0	0	0	0	0	0	0	0		0	0	0	0	0	0	0	0	0	0	0	no
adlib_Sample_3893_AT_7	CTCAATTAGCGACTGA-1	adlib	ad_libitum_fed	Singlet	neuron	magnaclass1	0	0	0	0	0	0	0	0	0	0	1	0		1	68	1	55	75	0	0	0	0	0	0	yes
adlib_Sample_3893_AT_7	CTCAATTCAGATAAAC-1	adlib	ad_libitum_fed	Singlet	neuron	magnaclass2	0	0	0	0	1	19	0	0	0	0	1	0		1	57	0	0	0	0	0	1	10	0	0	yes
adlib_Sample_3893_AT_7	CTCAATTCATATAGCC-1	adlib	ad_libitum_fed	Singlet	neuron	magnaclass2	0	0	0	0	0	0	0	0	0	0	1	0		1	51	0	0	0	0	0	0	0	0	0	no
adlib_Sample_3893_AT_7	CTCAATTGTATCAAGA-1	adlib	ad_libitum_fed	Singlet	neuron	magnaclass2	0	0	0	0	0	0	0	0	0	0	0	0		0	0	0	0	0	0	0	0	0	0	0	no
adlib_Sample_3893_AT_7	CTCAATTTCGTTCCCA-1	adlib	ad_libitum_fed	Singlet	neuron	Lhx2_class	0	0	0	0	0	0	0	0	0	0	1	0		1	80	0	0	0	0	0	0	0	0	0	no
adlib_Sample_3893_AT_7	CTCACTGAGCCTCGTG-1	adlib	ad_libitum_fed	Singlet	neuron	magnaclass1	0	0	0	0	0	0	0	0	0	0	0	0		0	0	1	0	88	0	0	0	0	0	0	no
adlib_Sample_3893_AT_7	CTCACTGAGGGACTGT-1	adlib	ad_libitum_fed	Singlet	neuron	magnaclass2	0	0	0	0	0	0	0	0	0	0	0	0		0	0	0	0	0	0	0	0	0	1	87	no
adlib_Sample_3893_AT_7	CTCACTGAGGTGGGTT-1	adlib	ad_libitum_fed	Singlet	neuron	magnaclass2	0	0	0	0	0	0	0	0	0	0	0	0		0	0	0	0	0	0	0	0	0	0	0	no
adlib_Sample_3893_AT_7	CTCACTGTCCACAAGT-1	adlib	ad_libitum_fed	Singlet	neuron	Lhx2_class	0	0	0	0	1	19	0	0	0	0	1	0		1	30	0	0	0	0	0	0	0	0	0	yes
adlib_Sample_3893_AT_7	CTCACTGTCTGAGAAA-1	adlib	ad_libitum_fed	Singlet	neuron	magnaclass1	0	0	0	0	0	0	0	0	0	0	0	0		0	0	1	44	66	1	69	0	0	0	0	yes
adlib_Sample_3893_AT_7	CTCAGAAAGGAGGCAG-1	adlib	ad_libitum_fed	Singlet	neuron	Lrmda_class	0	0	0	0	0	0	0	0	0	0	1	0		1	52	1	40	28	1	85	0	0	0	0	yes
adlib_Sample_3893_AT_7	CTCAGAAAGGCCTTGC-1	adlib	ad_libitum_fed	Singlet	neuron	magnaclass1	0	0	0	0	0	0	0	0	0	0	1	0		1	98	0	0	0	0	0	0	0	0	0	no
adlib_Sample_3893_AT_7	CTCAGAAAGTATTAGG-1	adlib	ad_libitum_fed	Singlet	neuron	magnaclass2	0	0	0	0	0	0	0	0	0	0	0	0		0	0	0	0	0	0	0	0	0	0	0	no
adlib_Sample_3893_AT_7	CTCAGAAAGTCGGCCT-1	adlib	ad_libitum_fed	Singlet	neuron	magnaclass1	0	0	0	0	0	0	0	0	0	0	1	0		1	84	1	35	0	0	0	0	0	0	0	yes
adlib_Sample_3893_AT_7	CTCAGAACAAACAGGC-1	adlib	ad_libitum_fed	Singlet	neuron	Lhx2_class	0	0	1	44	1	73	0	0	0	0	0	0		0	0	1	44	0	0	0	0	0	0	0	yes
adlib_Sample_3893_AT_7	CTCAGAACACCTCAGG-1	adlib	ad_libitum_fed	Singlet	neuron	magnaclass1	0	0	0	0	0	0	0	0	0	0	0	0		0	0	1	0	78	0	0	0	0	0	0	no
adlib_Sample_3893_AT_7	CTCAGAACAGTTAAAG-1	adlib	ad_libitum_fed	Singlet	neuron	magnaclass1	0	0	0	0	0	0	0	0	0	0	0	0		0	0	0	0	0	0	0	0	0	0	0	no
adlib_Sample_3893_AT_7	CTCAGAAGTAGGAAAG-1	adlib	ad_libitum_fed	Singlet	neuron	Sall3_class	0	0	0	0	0	0	0	0	0	0	1	0		1	82	0	0	0	1	99	0	0	0	0	yes
adlib_Sample_3893_AT_7	CTCAGAAGTATCCCAA-1	adlib	ad_libitum_fed	Singlet	neuron	magnaclass2	0	0	0	0	0	0	0	0	0	0	0	0		0	0	1	49	35	0	0	0	0	0	0	no
adlib_Sample_3893_AT_7	CTCAGAATCACTCGAA-1	adlib	ad_libitum_fed	Singlet	neuron	magnaclass1	0	0	0	0	1	70	0	0	0	0	1	0		1	53	1	41	29	1	28	0	0	0	0	yes
adlib_Sample_3893_AT_7	CTCAGAATCCTTCGAC-1	adlib	ad_libitum_fed	Singlet	neuron	magnaclass1	0	0	0	0	0	0	0	0	0	0	1	0		1	64	1	0	37	0	0	0	0	0	0	yes
adlib_Sample_3893_AT_7	CTCAGAATCTGCACCT-1	adlib	ad_libitum_fed	Singlet	neuron	magnaclass2	1	6	0	0	0	0	0	0	0	0	1	0		1	4	0	0	0	1	2	0	0	0	0	yes
adlib_Sample_3893_AT_7	CTCAGGGGTTGTAAAG-1	adlib	ad_libitum_fed	Singlet	neuron	magnaclass2	0	0	0	0	0	0	0	0	0	0	1	0		1	77	0	0	0	0	0	0	0	1	68	yes
adlib_Sample_3893_AT_7	CTCAGGGTCCCAGGCA-1	adlib	ad_libitum_fed	Singlet	neuron	magnaclass2	0	0	0	0	0	0	0	0	0	0	1	0		1	13	0	0	0	0	0	0	0	0	0	no
adlib_Sample_3893_AT_7	CTCAGTCAGGACTATA-1	adlib	ad_libitum_fed	Singlet	neuron	magnaclass2	0	0	0	0	0	0	0	0	0	0	0	0		0	0	0	0	0	0	0	0	0	0	0	no
adlib_Sample_3893_AT_7	CTCAGTCGTAGCTAAA-1	adlib	ad_libitum_fed	Singlet	neuron	magnaclass1	0	0	1	57	0	0	0	0	0	0	0	0		0	0	0	0	0	0	0	0	0	0	0	no
adlib_Sample_3893_AT_7	CTCAGTCTCTAACGCA-1	adlib	ad_libitum_fed	Singlet	neuron	magnaclass1	0	0	0	0	0	0	0	0	0	0	0	0		0	0	1	98	0	1	50	0	0	0	0	yes
adlib_Sample_3893_AT_7	CTCATCGGTATCAGGG-1	adlib	ad_libitum_fed	Singlet	neuron	magnaclass2	0	0	0	0	0	0	0	0	0	0	1	0		1	33	0	0	0	0	0	1	70	0	0	yes
adlib_Sample_3893_AT_7	CTCATCGGTCGTTCAA-1	adlib	ad_libitum_fed	Singlet	neuron	Sall3_class	0	0	0	0	0	0	0	0	0	0	0	0		0	0	1	94	22	1	78	0	0	0	0	yes
adlib_Sample_3893_AT_7	CTCATCGTCGCGTCGA-1	adlib	ad_libitum_fed	Singlet	neuron	magnaclass2	0	0	0	0	0	0	0	0	0	0	0	0		0	0	0	0	0	0	0	0	0	0	0	no
adlib_Sample_3893_AT_7	CTCATGCAGCATTGTC-1	adlib	ad_libitum_fed	Singlet	neuron	magnaclass2	0	0	0	0	0	0	0	0	0	0	0	0		0	0	0	0	0	0	0	0	0	1	20	no
adlib_Sample_3893_AT_7	CTCATGCCAGTGTGCC-1	adlib	ad_libitum_fed	Singlet	neuron	magnaclass2	0	0	0	0	0	0	0	0	0	0	0	0		0	0	0	0	0	0	0	0	0	1	45	no
adlib_Sample_3893_AT_7	CTCATGCGTGTAGTGG-1	adlib	ad_libitum_fed	Singlet	neuron	pH_class	0	0	0	0	0	0	0	0	0	0	0	0		0	0	0	0	0	0	0	0	0	0	0	no
adlib_Sample_3893_AT_7	CTCATGCGTTGGGACA-1	adlib	ad_libitum_fed	Singlet	neuron	magnaclass1	0	0	0	0	0	0	0	0	0	0	0	0		0	0	1	84	36	0	0	0	0	0	0	no
adlib_Sample_3893_AT_7	CTCATGCTCCAGTTCC-1	adlib	ad_libitum_fed	Singlet	neuron	Lrmda_class	0	0	0	0	0	0	0	0	0	0	1	0		1	28	0	0	0	0	0	0	0	0	0	no
adlib_Sample_3893_AT_7	CTCATTAAGAGTAACT-1	adlib	ad_libitum_fed	Singlet	neuron	Sall3_class	0	0	0	0	0	0	0	0	0	0	1	0		1	55	1	43	65	1	97	1	55	0	0	yes
adlib_Sample_3893_AT_7	CTCATTAGTACTCGAT-1	adlib	ad_libitum_fed	Singlet	neuron	monoamine_class	0	0	0	0	0	0	0	0	0	0	0	0		0	0	0	0	0	0	0	0	0	0	0	no
adlib_Sample_3893_AT_7	CTCATTAGTGACTCGC-1	adlib	ad_libitum_fed	Singlet	neuron	magnaclass2	0	0	0	0	0	0	0	0	0	0	0	0		0	0	0	0	0	0	0	0	0	0	0	no
adlib_Sample_3893_AT_7	CTCATTAGTGCATACT-1	adlib	ad_libitum_fed	Singlet	neuron	monoamine_class	0	0	0	0	0	0	0	0	0	0	0	0		0	0	0	0	0	0	0	0	0	0	0	no
adlib_Sample_3893_AT_7	CTCCAACCAGTGTATC-1	adlib	ad_libitum_fed	Singlet	neuron	monoamine_class	0	0	0	0	0	0	0	0	0	0	0	0		0	0	0	0	0	0	0	0	0	0	0	no
adlib_Sample_3893_AT_7	CTCCAACCATCTGTTT-1	adlib	ad_libitum_fed	Singlet	neuron	Sall3_class	0	0	0	0	0	0	0	0	0	0	1	0		1	56	0	0	0	1	31	1	56	0	0	yes
adlib_Sample_3893_AT_7	CTCCACAAGATGCCGA-1	adlib	ad_libitum_fed	Singlet	neuron	magnaclass1	0	0	0	0	0	0	0	0	0	0	0	0		0	0	1	0	75	0	0	0	0	0	0	no
adlib_Sample_3893_AT_7	CTCCACAGTACAAAGT-1	adlib	ad_libitum_fed	Singlet	neuron	magnaclass1	0	0	0	0	0	0	0	0	0	0	1	0		1	63	1	95	71	0	0	0	0	1	57	yes
adlib_Sample_3893_AT_7	CTCCACATCAAGTCTG-1	adlib	ad_libitum_fed	Singlet	neuron	Lrmda_class	0	0	0	0	0	0	0	0	0	0	1	0		1	38	1	7	0	1	66	0	0	0	0	yes
adlib_Sample_3893_AT_7	CTCCACATCTCTATAC-1	adlib	ad_libitum_fed	Singlet	neuron	magnaclass1	0	0	0	0	0	0	0	0	0	0	1	0		1	82	1	48	87	0	0	0	0	0	0	yes
adlib_Sample_3893_AT_7	CTCCACATCTTCACAT-1	adlib	ad_libitum_fed	Singlet	neuron	magnaclass2	0	0	0	0	0	0	0	0	0	0	1	0		1	78	0	0	0	0	0	0	0	0	0	no
adlib_Sample_3893_AT_7	CTCCATGAGGTAGTAT-1	adlib	ad_libitum_fed	Singlet	neuron	monoamine_class	0	0	1	16	0	0	0	0	0	0	1	0		1	16	0	0	0	0	0	0	0	0	0	yes
adlib_Sample_3893_AT_7	CTCCATGCAGATTAAG-1	adlib	ad_libitum_fed	Singlet	neuron	Sall3_class	0	0	0	0	0	0	0	0	0	0	0	0		0	0	1	50	11	1	75	0	0	1	57	yes
adlib_Sample_3893_AT_7	CTCCATGCATGACTTG-1	adlib	ad_libitum_fed	Singlet	neuron	magnaclass1	0	0	1	70	1	34	0	0	0	0	0	0		0	0	1	12	48	1	50	0	0	0	0	yes
adlib_Sample_3893_AT_7	CTCCATGGTCGAGCTC-1	adlib	ad_libitum_fed	Singlet	neuron	magnaclass2	0	0	0	0	0	0	0	0	0	0	1	0		1	64	0	0	0	0	0	0	0	0	0	no
adlib_Sample_3893_AT_7	CTCCATGTCGATTGGT-1	adlib	ad_libitum_fed	Singlet	neuron	magnaclass2	0	0	0	0	0	0	0	0	0	0	0	0		0	0	0	0	0	0	0	0	0	0	0	no
adlib_Sample_3893_AT_7	CTCCCAACAAACCATC-1	adlib	ad_libitum_fed	Singlet	neuron	monoamine_class	0	0	0	0	0	0	1	13	0	0	1	0		1	15	0	0	0	0	0	0	0	0	0	yes
adlib_Sample_3893_AT_7	CTCCCAACACCAGTAT-1	adlib	ad_libitum_fed	Singlet	neuron	monoamine_class	0	0	0	0	0	0	0	0	0	0	1	0		1	48	0	0	0	0	0	0	0	0	0	no
adlib_Sample_3893_AT_7	CTCCCAACAGCCGTCA-1	adlib	ad_libitum_fed	Singlet	neuron	magnaclass1	0	0	0	0	0	0	0	0	0	0	0	0		0	0	1	0	53	1	77	0	0	0	0	yes
adlib_Sample_3893_AT_7	CTCCCAAGTCGCAGTC-1	adlib	ad_libitum_fed	Singlet	neuron	monoamine_class	0	0	0	0	0	0	0	0	0	0	1	0		1	66	0	0	0	0	0	0	0	1	59	yes
adlib_Sample_3893_AT_7	CTCCCAAGTGTATTCG-1	adlib	ad_libitum_fed	Singlet	neuron	magnaclass2	0	0	0	0	0	0	0	0	0	0	1	0		1	60	0	0	0	0	0	0	0	0	0	no
adlib_Sample_3893_AT_7	CTCCCAATCCGCAACG-1	adlib	ad_libitum_fed	Singlet	neuron	magnaclass1	0	0	0	0	0	0	0	0	0	0	0	0		0	0	1	66	91	1	18	0	0	0	0	yes
adlib_Sample_3893_AT_7	CTCCCAATCGAACACT-1	adlib	ad_libitum_fed	Singlet	neuron	pH_class	0	0	0	0	0	0	0	0	0	0	0	0		0	0	1	26	48	1	49	0	0	0	0	yes
adlib_Sample_3893_AT_7	CTCCCTCAGTGCAGGT-1	adlib	ad_libitum_fed	Singlet	neuron	Sall3_class	0	0	0	0	0	0	0	0	0	0	1	0		1	20	1	0	63	1	35	0	0	1	5	yes
adlib_Sample_3893_AT_7	CTCCCTCGTAGATGTA-1	adlib	ad_libitum_fed	Singlet	neuron	magnaclass1	0	0	0	0	0	0	0	0	0	0	0	0		0	0	1	0	67	0	0	0	0	0	0	no
adlib_Sample_3893_AT_7	CTCCCTCTCCCATACC-1	adlib	ad_libitum_fed	Singlet	neuron	magnaclass1	0	0	0	0	0	0	0	0	0	0	0	0		0	0	1	88	0	0	0	0	0	0	0	no
adlib_Sample_3893_AT_7	CTCCGATCAAGTGGTG-1	adlib	ad_libitum_fed	Singlet	neuron	magnaclass2	0	0	0	0	0	0	0	0	0	0	0	0		0	0	0	0	0	0	0	0	0	1	92	no
adlib_Sample_3893_AT_7	CTCCGATCACCGGAAA-1	adlib	ad_libitum_fed	Singlet	neuron	magnaclass1	0	0	0	0	0	0	0	0	0	0	0	0		0	0	1	0	36	1	36	1	94	0	0	yes
adlib_Sample_3893_AT_7	CTCCGATCACTTGAGT-1	adlib	ad_libitum_fed	Singlet	neuron	magnaclass2	0	0	0	0	0	0	0	0	0	0	0	0		0	0	1	46	0	0	0	0	0	0	0	no
adlib_Sample_3893_AT_7	CTCCGATGTCCTGGGT-1	adlib	ad_libitum_fed	Singlet	neuron	magnaclass1	0	0	0	0	0	0	0	0	0	0	0	0		0	0	0	0	0	0	0	0	0	0	0	no
adlib_Sample_3893_AT_7	CTCCTCCTCGATTGGT-1	adlib	ad_libitum_fed	Singlet	neuron	monoamine_class	0	0	0	0	0	0	0	0	0	0	0	0		0	0	0	0	0	0	0	0	0	1	39	no
adlib_Sample_3893_AT_7	CTCCTCCTCTTCACAT-1	adlib	ad_libitum_fed	Singlet	neuron	magnaclass1	0	0	0	0	0	0	0	0	0	0	0	0		0	0	1	0	87	1	57	0	0	0	0	yes
adlib_Sample_3893_AT_7	CTCCTTTAGATAGTGT-1	adlib	ad_libitum_fed	Singlet	neuron	magnaclass1	0	0	0	0	0	0	0	0	0	0	0	0		0	0	1	0	91	0	0	0	0	0	0	no
adlib_Sample_3893_AT_7	CTCCTTTAGGCGTCCT-1	adlib	ad_libitum_fed	Singlet	neuron	monoamine_class	0	0	0	0	0	0	0	0	0	0	0	0		0	0	0	0	0	0	0	0	0	0	0	no
adlib_Sample_3893_AT_7	CTCCTTTCACGTACTA-1	adlib	ad_libitum_fed	Singlet	neuron	magnaclass2	0	0	0	0	0	0	0	0	0	0	0	0		0	0	0	0	0	0	0	0	0	0	0	no
adlib_Sample_3893_AT_7	CTCCTTTCACTGCGAC-1	adlib	ad_libitum_fed	Singlet	neuron	magnaclass1	0	0	0	0	0	0	0	0	0	0	1	0		1	88	1	58	0	1	89	0	0	0	0	yes
adlib_Sample_3893_AT_7	CTCCTTTGTTGACTGT-1	adlib	ad_libitum_fed	Singlet	neuron	magnaclass2	0	0	0	0	0	0	0	0	0	0	0	0		0	0	0	0	0	0	0	0	0	0	0	no
adlib_Sample_3893_AT_7	CTCCTTTTCCATCCGT-1	adlib	ad_libitum_fed	Singlet	neuron	magnaclass1	0	0	0	0	0	0	0	0	0	0	1	0		1	26	1	56	0	0	0	0	0	0	0	yes
adlib_Sample_3893_AT_7	CTCCTTTTCTGGACTA-1	adlib	ad_libitum_fed	Singlet	neuron	magnaclass1	0	0	0	0	0	0	0	0	0	0	1	0		1	71	1	0	15	1	44	0	0	0	0	yes
adlib_Sample_3893_AT_7	CTCGAGGAGAAGGTAG-1	adlib	ad_libitum_fed	Singlet	neuron	magnaclass1	0	0	0	0	0	0	0	0	0	0	0	0		0	0	0	0	0	0	0	0	0	0	0	no
adlib_Sample_3893_AT_7	CTCGAGGAGAGCCATG-1	adlib	ad_libitum_fed	Singlet	neuron	corelautus_class	0	0	0	0	0	0	0	0	0	0	1	0		1	99	0	0	0	0	0	0	0	0	0	no
adlib_Sample_3893_AT_7	CTCGAGGCAACGGCTC-1	adlib	ad_libitum_fed	Singlet	neuron	magnaclass1	0	0	0	0	0	0	0	0	0	0	1	0		1	98	1	0	53	1	55	0	0	0	0	yes
adlib_Sample_3893_AT_7	CTCGAGGCATCCGTTC-1	adlib	ad_libitum_fed	Singlet	neuron	magnaclass2	0	0	0	0	0	0	0	0	0	0	0	0		0	0	0	0	0	0	0	0	0	0	0	no
adlib_Sample_3893_AT_7	CTCTCAGAGAGTCTGG-1	adlib	ad_libitum_fed	Singlet	neuron	magnaclass2	0	0	0	0	0	0	0	0	0	0	1	0		1	96	0	0	0	0	0	0	0	0	0	no
adlib_Sample_3893_AT_7	CTCTCAGAGTCCCAAT-1	adlib	ad_libitum_fed	Singlet	neuron	monoamine_class	0	0	0	0	0	0	0	0	0	0	1	0		1	47	0	0	0	0	0	1	48	0	0	yes
adlib_Sample_3893_AT_7	CTCTCGACAGTTAAAG-1	adlib	ad_libitum_fed	Singlet	neuron	magnaclass1	0	0	0	0	0	0	0	0	0	0	0	0		0	0	1	32	54	1	78	0	0	0	0	yes
adlib_Sample_3893_AT_7	CTCTCGAGTGGTCCCA-1	adlib	ad_libitum_fed	Singlet	neuron	Lrmda_class	0	0	0	0	0	0	0	0	0	0	1	0		1	25	1	20	13	0	0	0	0	0	0	yes
adlib_Sample_3893_AT_7	CTCTCGATCAACGAGG-1	adlib	ad_libitum_fed	Singlet	neuron	magnaclass1	0	0	0	0	0	0	0	0	0	0	1	0		1	78	1	0	31	1	52	0	0	0	0	yes
adlib_Sample_3893_AT_7	CTCTCGATCATTTGCT-1	adlib	ad_libitum_fed	Singlet	neuron	magnaclass1	0	0	0	0	1	87	0	0	0	0	1	0		1	40	1	30	21	0	0	0	0	1	39	yes
adlib_Sample_3893_AT_7	CTCTGGTGTGGCCCAT-1	adlib	ad_libitum_fed	Singlet	neuron	magnaclass2	0	0	0	0	0	0	0	0	0	0	0	0		0	0	0	0	0	0	0	0	0	0	0	no
adlib_Sample_3893_AT_7	CTGAATGAGAGCCGAT-1	adlib	ad_libitum_fed	Singlet	neuron	magnaclass1	0	0	0	0	0	0	0	0	0	0	0	0		0	0	0	0	0	1	76	0	0	0	0	no
adlib_Sample_3893_AT_7	CTGAATGAGCGTGCTC-1	adlib	ad_libitum_fed	Singlet	neuron	magnaclass2	0	0	0	0	0	0	0	0	0	0	0	0		0	0	0	0	0	0	0	0	0	0	0	no
adlib_Sample_3893_AT_7	CTGAATGAGCTCGACC-1	adlib	ad_libitum_fed	Singlet	neuron	magnaclass2	0	0	0	0	1	95	0	0	0	0	0	0		0	0	1	0	81	0	0	0	0	0	0	yes
adlib_Sample_3893_AT_7	CTGAATGCAACGAGGT-1	adlib	ad_libitum_fed	Singlet	neuron	Lhx2_class	0	0	0	0	1	29	0	0	0	0	1	0		1	10	0	0	0	0	0	0	0	0	0	yes
adlib_Sample_3893_AT_7	CTGAATGCACCGCTAG-1	adlib	ad_libitum_fed	Singlet	neuron	magnaclass1	1	12	0	0	0	0	0	0	0	0	0	0		0	0	1	73	69	1	5	0	0	0	0	yes
adlib_Sample_3893_AT_7	CTGAATGGTCGGTACC-1	adlib	ad_libitum_fed	Singlet	neuron	magnaclass1	0	0	0	0	0	0	0	0	0	0	0	0		0	0	1	0	75	1	40	1	87	1	98	yes
adlib_Sample_3893_AT_7	CTGAATGGTGAGGAAA-1	adlib	ad_libitum_fed	Singlet	neuron	magnaclass2	0	0	0	0	0	0	0	0	0	0	1	0		1	65	0	0	0	0	0	0	0	0	0	no
adlib_Sample_3893_AT_7	CTGAATGTCCTAGAGT-1	adlib	ad_libitum_fed	Singlet	neuron	magnaclass2	0	0	0	0	1	82	0	0	0	0	0	0		0	0	0	0	0	0	0	0	0	0	0	no
adlib_Sample_3893_AT_7	CTGAGCGGTAACACGG-1	adlib	ad_libitum_fed	Singlet	neuron	magnaclass2	0	0	0	0	0	0	0	0	0	0	0	0		0	0	0	0	0	0	0	0	0	0	0	no
adlib_Sample_3893_AT_7	CTGAGCGGTGACATCT-1	adlib	ad_libitum_fed	Singlet	neuron	magnaclass2	0	0	0	0	0	0	0	0	0	0	0	0		0	0	0	0	0	0	0	0	0	0	0	no
adlib_Sample_3893_AT_7	CTGAGCGTCCGCATAA-1	adlib	ad_libitum_fed	Singlet	neuron	magnaclass2	0	0	0	0	0	0	0	0	0	0	1	0		1	55	0	0	0	0	0	0	0	0	0	no
adlib_Sample_3893_AT_7	CTGAGGCAGTATGATG-1	adlib	ad_libitum_fed	Singlet	neuron	magnaclass1	0	0	0	0	0	0	0	0	0	0	0	0		0	0	0	0	0	0	0	0	0	0	0	no
adlib_Sample_3893_AT_7	CTGAGGCGTAGGTGCA-1	adlib	ad_libitum_fed	Singlet	neuron	magnaclass1	0	0	0	0	1	71	0	0	0	0	0	0		0	0	1	42	0	0	0	0	0	0	0	yes
adlib_Sample_3893_AT_7	CTGAGGCGTGTGTCGC-1	adlib	ad_libitum_fed	Singlet	neuron	magnaclass1	0	0	0	0	0	0	0	0	0	0	0	0		0	0	1	29	0	1	97	0	0	0	0	yes
adlib_Sample_3893_AT_7	CTGAGGCGTTTGGCTA-1	adlib	ad_libitum_fed	Singlet	neuron	monoamine_class	0	0	0	0	0	0	0	0	0	0	1	0		1	71	0	0	0	0	0	0	0	0	0	no
adlib_Sample_3893_AT_7	CTGATCCAGAGTCAAT-1	adlib	ad_libitum_fed	Singlet	neuron	magnaclass2	0	0	0	0	0	0	0	0	0	0	0	0		0	0	0	0	0	0	0	0	0	0	0	no
adlib_Sample_3893_AT_7	CTGATCCCAGAGAAAG-1	adlib	ad_libitum_fed	Singlet	neuron	magnaclass1	0	0	0	0	0	0	0	0	0	0	1	0		1	61	1	94	0	0	0	0	0	0	0	yes
adlib_Sample_3893_AT_7	CTGATCCGTTCGAACT-1	adlib	ad_libitum_fed	Singlet	neuron	magnaclass1	0	0	0	0	0	0	0	0	0	0	1	0		1	85	1	36	25	1	61	0	0	0	0	yes
adlib_Sample_3893_AT_7	CTGATCCTCATCGCTC-1	adlib	ad_libitum_fed	Singlet	neuron	magnaclass2	0	0	0	0	1	86	0	0	0	0	1	0		1	78	0	0	0	0	0	0	0	0	0	yes
adlib_Sample_3893_AT_7	CTGATCCTCCTCACTG-1	adlib	ad_libitum_fed	Singlet	neuron	magnaclass1	0	0	0	0	0	0	0	0	0	0	0	0		0	0	1	45	0	0	0	1	57	0	0	yes
adlib_Sample_3893_AT_7	CTGCAGGAGCCTGACC-1	adlib	ad_libitum_fed	Singlet	neuron	Sall3_class	0	0	0	0	0	0	0	0	0	0	0	0		0	0	1	36	0	1	24	0	0	0	0	yes
adlib_Sample_3893_AT_7	CTGCAGGGTCGAACGA-1	adlib	ad_libitum_fed	Singlet	neuron	magnaclass2	0	0	0	0	0	0	0	0	0	0	1	0		1	44	0	0	0	0	0	0	0	0	0	no
adlib_Sample_3893_AT_7	CTGCAGGGTGTAAATG-1	adlib	ad_libitum_fed	Singlet	neuron	magnaclass2	0	0	0	0	0	0	0	0	0	0	0	0		0	0	0	0	0	0	0	0	0	0	0	no
adlib_Sample_3893_AT_7	CTGCAGGGTTCGGTCG-1	adlib	ad_libitum_fed	Singlet	neuron	magnaclass2	0	0	0	0	0	0	0	0	0	0	1	0		1	86	0	0	0	0	0	0	0	0	0	no
adlib_Sample_3893_AT_7	CTGCAGGGTTTGGAGG-1	adlib	ad_libitum_fed	Singlet	neuron	monoamine_class	0	0	0	0	0	0	0	0	0	0	1	1		0	0	0	0	0	0	0	0	0	1	73	yes
adlib_Sample_3893_AT_7	CTGCAGGTCGTAGAGG-1	adlib	ad_libitum_fed	Singlet	neuron	Sall3_class	0	0	0	0	0	0	0	0	0	0	1	0		1	85	1	95	0	0	0	0	0	0	0	yes
adlib_Sample_3893_AT_7	CTGCAGGTCTTACGGA-1	adlib	ad_libitum_fed	Singlet	neuron	magnaclass1	0	0	0	0	0	0	0	0	0	0	0	0		0	0	1	83	70	0	0	0	0	0	0	no
adlib_Sample_3893_AT_7	CTGCATCAGGCGTTGA-1	adlib	ad_libitum_fed	Singlet	neuron	monoamine_class	0	0	0	0	0	0	0	0	0	0	0	0		0	0	0	0	0	0	0	0	0	0	0	no
adlib_Sample_3893_AT_7	CTGCATCGTAGAGTTA-1	adlib	ad_libitum_fed	Singlet	neuron	magnaclass1	0	0	0	0	0	0	0	0	0	0	0	0		0	0	1	0	64	0	0	0	0	0	0	no
adlib_Sample_3893_AT_7	CTGCATCGTCGCCTAG-1	adlib	ad_libitum_fed	Singlet	neuron	monoamine_class	0	0	1	73	0	0	0	0	0	0	0	0		0	0	0	0	0	0	0	0	0	0	0	no
adlib_Sample_3893_AT_7	CTGCATCGTGGACTGA-1	adlib	ad_libitum_fed	Singlet	neuron	magnaclass1	0	0	0	0	0	0	0	0	0	0	0	0		0	0	1	66	84	0	0	0	0	1	70	yes
adlib_Sample_3893_AT_7	CTGCCATAGGAGGCAG-1	adlib	ad_libitum_fed	Singlet	neuron	magnaclass2	0	0	0	0	0	0	0	0	0	0	0	0		0	0	0	0	0	0	0	0	0	0	0	no
adlib_Sample_3893_AT_7	CTGCCATAGGCTGTAG-1	adlib	ad_libitum_fed	Singlet	neuron	Sall3_class	0	0	0	0	0	0	0	0	0	0	1	0		1	45	1	72	78	0	0	0	0	0	0	yes
adlib_Sample_3893_AT_7	CTGCCATGTCATACCA-1	adlib	ad_libitum_fed	Singlet	neuron	monoamine_class	0	0	1	79	0	0	1	97	0	0	0	0		0	0	0	0	0	0	0	0	0	0	0	no
adlib_Sample_3893_AT_7	CTGCCTACAAGGTACG-1	adlib	ad_libitum_fed	Singlet	neuron	magnaclass1	0	0	0	0	0	0	0	0	0	0	0	0		0	0	0	0	0	1	94	0	0	0	0	no
adlib_Sample_3893_AT_7	CTGCGAGAGGCTCTCG-1	adlib	ad_libitum_fed	Singlet	neuron	magnaclass1	0	0	0	0	0	0	0	0	0	0	0	0		0	0	1	66	84	1	18	0	0	0	0	yes
adlib_Sample_3893_AT_7	CTGCGAGAGTCACGAG-1	adlib	ad_libitum_fed	Singlet	neuron	Lrmda_class	0	0	0	0	0	0	0	0	0	0	1	0		1	8	0	0	0	0	0	0	0	0	0	no
adlib_Sample_3893_AT_7	CTGCGAGGTTGCTCAA-1	adlib	ad_libitum_fed	Singlet	neuron	magnaclass1	0	0	1	38	0	0	0	0	0	0	0	0		0	0	1	37	0	0	0	0	0	1	76	yes
adlib_Sample_3893_AT_7	CTGCTCAAGGCCTGCT-1	adlib	ad_libitum_fed	Singlet	neuron	magnaclass1	0	0	0	0	0	0	0	0	0	0	0	0		0	0	0	0	0	0	0	0	0	0	0	no
adlib_Sample_3893_AT_7	CTGCTCACATTCTGTT-1	adlib	ad_libitum_fed	Singlet	neuron	magnaclass2	0	0	0	0	0	0	0	0	0	0	1	0		1	94	1	0	12	0	0	0	0	0	0	yes
adlib_Sample_3893_AT_7	CTGCTCATCAGCAGAG-1	adlib	ad_libitum_fed	Singlet	neuron	pH_class	0	0	0	0	0	0	0	0	0	0	0	0		0	0	0	0	0	0	0	0	0	0	0	no
adlib_Sample_3893_AT_7	CTGGACGAGAGGCGTT-1	adlib	ad_libitum_fed	Singlet	neuron	magnaclass2	0	0	0	0	0	0	0	0	0	0	0	0		0	0	0	0	0	0	0	0	0	0	0	no
adlib_Sample_3893_AT_7	CTGGACGAGCAAACAT-1	adlib	ad_libitum_fed	Singlet	neuron	Lrmda_class	0	0	0	0	0	0	0	0	0	0	0	0		0	0	0	0	0	0	0	0	0	0	0	no
adlib_Sample_3893_AT_7	CTGGACGCAACTCATG-1	adlib	ad_libitum_fed	Singlet	neuron	magnaclass1	0	0	0	0	0	0	0	0	0	0	1	0		1	43	1	0	23	1	22	0	0	1	42	yes
adlib_Sample_3893_AT_7	CTGGACGGTAGCGATG-1	adlib	ad_libitum_fed	Singlet	neuron	magnaclass2	0	0	0	0	0	0	0	0	0	0	0	0		0	0	0	0	0	0	0	0	0	0	0	no
adlib_Sample_3893_AT_7	CTGGACGGTCCTTAAG-1	adlib	ad_libitum_fed	Singlet	neuron	magnaclass2	0	0	0	0	0	0	0	0	0	0	1	0		1	60	0	0	0	0	0	0	0	0	0	no
adlib_Sample_3893_AT_7	CTGGACGGTCTTACTT-1	adlib	ad_libitum_fed	Singlet	neuron	monoamine_class	0	0	1	56	0	0	0	0	0	0	1	0		1	18	0	0	0	0	0	0	0	0	0	yes
adlib_Sample_3893_AT_7	CTGGACGTCCGTGTGG-1	adlib	ad_libitum_fed	Singlet	neuron	magnaclass2	0	0	0	0	0	0	0	0	0	0	1	0		1	99	0	0	0	0	0	0	0	0	0	no
adlib_Sample_3893_AT_7	CTGGACGTCTTCCACG-1	adlib	ad_libitum_fed	Singlet	neuron	magnaclass1	0	0	0	0	0	0	0	0	0	0	0	0		0	0	0	0	0	1	88	1	65	1	29	yes
adlib_Sample_3893_AT_7	CTGGCAGAGCTCGGCT-1	adlib	ad_libitum_fed	Singlet	neuron	magnaclass2	0	0	0	0	0	0	0	0	0	0	0	0		0	0	0	0	0	0	0	0	0	0	0	no
adlib_Sample_3893_AT_7	CTGGCAGAGTCCCAGC-1	adlib	ad_libitum_fed	Singlet	neuron	Sall3_class	0	0	0	0	0	0	0	0	0	0	1	0		1	23	1	53	39	1	77	1	63	0	0	yes
adlib_Sample_3893_AT_7	CTGGCAGCAAGGTCTT-1	adlib	ad_libitum_fed	Singlet	neuron	monoamine_class	0	0	1	63	0	0	1	15	0	0	1	0		1	17	0	0	0	0	0	0	0	0	0	yes
adlib_Sample_3893_AT_7	CTGGCAGGTCATAAAG-1	adlib	ad_libitum_fed	Singlet	neuron	Lhx2_class	0	0	0	0	0	0	0	0	0	0	0	0		0	0	0	0	0	0	0	0	0	0	0	no
adlib_Sample_3893_AT_7	CTGGCAGTCGATTGAC-1	adlib	ad_libitum_fed	Singlet	neuron	Lrmda_class	0	0	0	0	0	0	0	0	0	0	0	0		0	0	1	0	77	0	0	0	0	0	0	no
adlib_Sample_3893_AT_7	CTGGTCTCAGATTAAG-1	adlib	ad_libitum_fed	Singlet	neuron	Sall3_class	0	0	0	0	0	0	0	0	0	0	1	0		1	53	1	78	29	1	67	0	0	0	0	yes
adlib_Sample_3893_AT_7	CTGGTCTGTAGCCCTG-1	adlib	ad_libitum_fed	Singlet	neuron	magnaclass1	0	0	0	0	0	0	0	0	0	0	1	0		1	73	1	60	97	0	0	1	67	0	0	yes
adlib_Sample_3893_AT_7	CTGGTCTGTATTCCTT-1	adlib	ad_libitum_fed	Singlet	neuron	magnaclass2	0	0	0	0	0	0	0	0	0	0	0	0		0	0	0	0	0	0	0	0	0	0	0	no
adlib_Sample_3893_AT_7	CTGGTCTTCATTCATC-1	adlib	ad_libitum_fed	Singlet	neuron	magnaclass2	0	0	0	0	0	0	0	0	0	0	1	0		1	46	0	0	0	0	0	0	0	0	0	no
adlib_Sample_3893_AT_7	CTGTACCCAAGGGTCA-1	adlib	ad_libitum_fed	Singlet	neuron	magnaclass2	0	0	0	0	0	0	0	0	0	0	1	0		1	8	0	0	0	0	0	0	0	0	0	no
adlib_Sample_3893_AT_7	CTGTACCCAAGTGGTG-1	adlib	ad_libitum_fed	Singlet	neuron	magnaclass1	0	0	0	0	0	0	0	0	0	0	0	0		0	0	0	0	0	1	99	0	0	0	0	no
adlib_Sample_3893_AT_7	CTGTACCGTTAATCGC-1	adlib	ad_libitum_fed	Singlet	neuron	Sall3_class	0	0	0	0	0	0	0	0	0	0	1	0		1	84	1	17	58	1	37	0	0	0	0	yes
adlib_Sample_3893_AT_7	CTGTACCTCGAGCTGC-1	adlib	ad_libitum_fed	Singlet	neuron	magnaclass2	0	0	0	0	1	35	0	0	0	0	1	0		1	53	0	0	0	0	0	0	0	0	0	yes
adlib_Sample_3893_AT_7	CTGTAGACAGAAATCA-1	adlib	ad_libitum_fed	Singlet	neuron	Lrmda_class	0	0	0	0	0	0	0	0	0	0	1	0		1	78	1	0	83	1	52	0	0	1	89	yes
adlib_Sample_3893_AT_7	CTGTAGAGTTAGTTCG-1	adlib	ad_libitum_fed	Singlet	neuron	magnaclass1	0	0	0	0	0	0	0	0	0	0	1	0		1	20	1	0	10	1	90	0	0	0	0	yes
adlib_Sample_3893_AT_7	CTGTATTAGATGGCGT-1	adlib	ad_libitum_fed	Singlet	neuron	Lrmda_class	0	0	0	0	0	0	0	0	0	0	1	0		1	20	0	0	0	1	74	0	0	1	24	yes
adlib_Sample_3893_AT_7	CTGTATTAGGAGTACC-1	adlib	ad_libitum_fed	Singlet	neuron	magnaclass1	0	0	0	0	0	0	0	0	0	0	1	0		1	40	1	31	74	1	20	0	0	0	0	yes
adlib_Sample_3893_AT_7	CTGTATTCAGTAGTTC-1	adlib	ad_libitum_fed	Singlet	neuron	corelautus_class	0	0	0	0	0	0	0	0	0	0	1	0		1	99	0	0	0	0	0	0	0	1	94	yes
adlib_Sample_3893_AT_7	CTGTATTGTGCAATGG-1	adlib	ad_libitum_fed	Singlet	neuron	magnaclass2	0	0	0	0	0	0	0	0	0	0	0	0		0	0	0	0	0	0	0	1	13	0	0	no
adlib_Sample_3893_AT_7	CTGTCGTAGCAGGTCA-1	adlib	ad_libitum_fed	Singlet	neuron	magnaclass1	0	0	0	0	1	70	0	0	0	0	1	0		1	53	1	99	63	1	29	1	53	0	0	yes
adlib_Sample_3893_AT_7	CTGTCGTTCTCGCTCA-1	adlib	ad_libitum_fed	Singlet	neuron	magnaclass2	0	0	0	0	0	0	0	0	0	0	1	0		1	66	0	0	0	0	0	0	0	0	0	no
adlib_Sample_3893_AT_7	CTGTCGTTCTGAGAGG-1	adlib	ad_libitum_fed	Singlet	neuron	magnaclass1	0	0	0	0	1	99	0	0	0	0	0	0		0	0	0	0	0	0	0	0	0	0	0	no
adlib_Sample_3893_AT_7	CTGTGAACAGGATCTT-1	adlib	ad_libitum_fed	Singlet	neuron	magnaclass2	0	0	0	0	0	0	0	0	0	0	0	0		0	0	0	0	0	0	0	0	0	0	0	no
adlib_Sample_3893_AT_7	CTGTGAACAGGTGTGA-1	adlib	ad_libitum_fed	Singlet	neuron	Lhx2_class	0	0	0	0	1	47	0	0	0	0	1	0		1	25	0	0	0	0	0	0	0	0	0	yes
adlib_Sample_3893_AT_7	CTGTGAAGTAGAGTTA-1	adlib	ad_libitum_fed	Singlet	neuron	magnaclass1	0	0	0	0	0	0	0	0	0	0	1	0		1	66	1	53	74	1	39	0	0	0	0	yes
adlib_Sample_3893_AT_7	CTGTGAAGTCGTGCCA-1	adlib	ad_libitum_fed	Singlet	neuron	magnaclass1	0	0	0	0	0	0	0	0	0	0	0	0		0	0	0	0	0	0	0	0	0	0	0	no
adlib_Sample_3893_AT_7	CTGTGAATCGATCCCT-1	adlib	ad_libitum_fed	Singlet	neuron	magnaclass1	0	0	0	0	0	0	0	0	0	0	0	0		0	0	1	0	26	0	0	0	0	0	0	no
adlib_Sample_3893_AT_7	CTGTGAATCTACTATC-1	adlib	ad_libitum_fed	Singlet	neuron	monoamine_class	0	0	1	58	0	0	0	0	0	0	0	0		0	0	0	0	0	0	0	0	0	0	0	no
adlib_Sample_3893_AT_7	CTGTGAATCTCTCTAA-1	adlib	ad_libitum_fed	Singlet	neuron	magnaclass1	0	0	0	0	0	0	0	0	0	0	0	0		0	0	0	0	0	1	92	0	0	0	0	no
adlib_Sample_3893_AT_7	CTGTGGGCAAGAATAC-1	adlib	ad_libitum_fed	Singlet	neuron	magnaclass2	0	0	0	0	0	0	0	0	0	0	0	0		0	0	0	0	0	0	0	0	0	0	0	no
adlib_Sample_3893_AT_7	CTGTGGGCAAGCAATA-1	adlib	ad_libitum_fed	Singlet	neuron	Lhx2_class	0	0	0	0	0	0	0	0	0	0	0	0		0	0	1	0	20	0	0	0	0	0	0	no
adlib_Sample_3893_AT_7	CTGTGGGGTAATACCC-1	adlib	ad_libitum_fed	Singlet	neuron	Lrmda_class	0	0	0	0	0	0	0	0	0	0	0	0		0	0	1	0	11	1	75	0	0	1	24	yes
adlib_Sample_3893_AT_7	CTGTGGGGTAATCAGA-1	adlib	ad_libitum_fed	Singlet	neuron	magnaclass2	0	0	0	0	0	0	0	0	0	0	1	0		1	38	0	0	0	0	0	1	73	0	0	yes
adlib_Sample_3893_AT_7	CTTACCGAGAGAGGGC-1	adlib	ad_libitum_fed	Singlet	neuron	Lrmda_class	0	0	0	0	0	0	0	0	0	0	0	0		0	0	1	64	49	0	0	0	0	0	0	no
adlib_Sample_3893_AT_7	CTTACCGAGTCGTTAC-1	adlib	ad_libitum_fed	Singlet	neuron	magnaclass2	0	0	0	0	0	0	0	0	0	0	1	0		1	61	0	0	0	0	0	0	0	0	0	no
adlib_Sample_3893_AT_7	CTTACCGGTCCGAAGA-1	adlib	ad_libitum_fed	Singlet	neuron	magnaclass1	0	0	0	0	0	0	0	0	0	0	1	0		1	65	1	0	89	0	0	0	0	0	0	yes
adlib_Sample_3893_AT_7	CTTACCGGTGACCGAA-1	adlib	ad_libitum_fed	Singlet	neuron	magnaclass1	0	0	0	0	0	0	0	0	0	0	0	0		0	0	1	0	75	0	0	0	0	1	40	yes
adlib_Sample_3893_AT_7	CTTACCGTCTCCGCAT-1	adlib	ad_libitum_fed	Singlet	neuron	magnaclass1	0	0	0	0	0	0	0	0	0	0	1	0		1	7	1	0	63	1	19	1	13	0	0	yes
adlib_Sample_3893_AT_7	CTTAGGAAGCCACTCG-1	adlib	ad_libitum_fed	Singlet	neuron	magnaclass1	0	0	0	0	0	0	0	0	0	0	1	0		1	48	1	0	26	1	25	0	0	0	0	yes
adlib_Sample_3893_AT_7	CTTAGGAAGCTTTCTT-1	adlib	ad_libitum_fed	Singlet	neuron	magnaclass1	0	0	0	0	0	0	0	0	0	0	1	0		1	66	1	53	90	1	92	0	0	0	0	yes
adlib_Sample_3893_AT_7	CTTAGGAAGGGACCAT-1	adlib	ad_libitum_fed	Singlet	neuron	magnaclass2	0	0	0	0	1	81	0	0	0	0	0	0		0	0	0	0	0	0	0	0	0	0	0	no
adlib_Sample_3893_AT_7	CTTAGGACACCGTACG-1	adlib	ad_libitum_fed	Singlet	neuron	monoamine_class	0	0	0	0	1	70	0	0	0	0	0	0		0	0	0	0	0	0	0	0	0	0	0	no
adlib_Sample_3893_AT_7	CTTAGGACAGCTGCCA-1	adlib	ad_libitum_fed	Singlet	neuron	Sall3_class	0	0	0	0	0	0	0	0	0	0	0	0		0	0	0	0	0	0	0	0	0	0	0	no
adlib_Sample_3893_AT_7	CTTAGGACAGGCTTGC-1	adlib	ad_libitum_fed	Singlet	neuron	magnaclass1	0	0	0	0	0	0	0	0	0	0	0	0		0	0	0	0	0	0	0	0	0	0	0	no
adlib_Sample_3893_AT_7	CTTAGGATCACAAGAA-1	adlib	ad_libitum_fed	Singlet	neuron	magnaclass1	0	0	0	0	0	0	0	0	0	0	0	0		0	0	0	0	0	1	55	0	0	0	0	no
adlib_Sample_3893_AT_7	CTTAGGATCTCGTCGT-1	adlib	ad_libitum_fed	Singlet	neuron	magnaclass2	0	0	0	0	0	0	0	0	0	0	1	0		1	44	0	0	0	0	0	0	0	0	0	no
adlib_Sample_3893_AT_7	CTTCAATGTAATGTGA-1	adlib	ad_libitum_fed	Singlet	neuron	Sall3_class	0	0	0	0	1	52	0	0	0	0	1	0		1	30	1	23	66	1	46	0	0	0	0	yes
adlib_Sample_3893_AT_7	CTTCAATGTATACGGG-1	adlib	ad_libitum_fed	Singlet	neuron	monoamine_class	0	0	1	18	0	0	0	0	0	0	1	0		1	19	0	0	0	0	0	0	0	0	0	yes
adlib_Sample_3893_AT_7	CTTCAATGTCACCCTT-1	adlib	ad_libitum_fed	Singlet	neuron	monoamine_class	0	0	0	0	0	0	0	0	0	0	0	0		0	0	0	0	0	0	0	0	0	0	0	no
adlib_Sample_3893_AT_7	CTTCAATGTCGATGCC-1	adlib	ad_libitum_fed	Singlet	neuron	Lrmda_class	0	0	0	0	0	0	0	0	0	0	0	0		0	0	0	0	0	1	31	1	56	0	0	yes
adlib_Sample_3893_AT_7	CTTCAATGTGTCTAAC-1	adlib	ad_libitum_fed	Singlet	neuron	magnaclass1	0	0	0	0	0	0	0	0	0	0	0	0		0	0	1	28	0	0	0	0	0	0	0	no
adlib_Sample_3893_AT_7	CTTCAATTCCTCAGGG-1	adlib	ad_libitum_fed	Singlet	neuron	Sall3_class	0	0	0	0	0	0	0	0	0	0	0	0		0	0	0	0	0	0	0	0	0	1	86	no
adlib_Sample_3893_AT_7	CTTCCGAAGGCTCTAT-1	adlib	ad_libitum_fed	Singlet	neuron	magnaclass2	0	0	0	0	0	0	0	0	0	0	0	0		0	0	0	0	0	0	0	0	0	0	0	no
adlib_Sample_3893_AT_7	CTTCCGAAGGTGAGCT-1	adlib	ad_libitum_fed	Singlet	neuron	Lhx2_class	0	0	0	0	0	0	0	0	0	0	1	0		1	34	0	0	0	0	0	0	0	1	35	yes
adlib_Sample_3893_AT_7	CTTCCGAGTATGAAGT-1	adlib	ad_libitum_fed	Singlet	neuron	magnaclass1	0	0	0	0	0	0	0	0	0	0	0	0		0	0	1	47	69	1	34	1	84	0	0	yes
adlib_Sample_3893_AT_7	CTTCCGATCAGCAGAG-1	adlib	ad_libitum_fed	Singlet	neuron	magnaclass1	0	0	0	0	0	0	0	0	0	0	0	0		0	0	1	42	64	1	30	0	0	0	0	yes
adlib_Sample_3893_AT_7	CTTCCGATCAGCTGTA-1	adlib	ad_libitum_fed	Singlet	neuron	monoamine_class	0	0	0	0	0	0	0	0	0	0	1	0		1	46	0	0	0	0	0	0	0	0	0	no
adlib_Sample_3893_AT_7	CTTCCTTAGGAGAGTA-1	adlib	ad_libitum_fed	Singlet	neuron	magnaclass2	0	0	0	0	0	0	0	0	0	0	0	0		0	0	0	0	0	0	0	0	0	0	0	no
adlib_Sample_3893_AT_7	CTTCCTTCACGCTGAC-1	adlib	ad_libitum_fed	Singlet	neuron	Lrmda_class	0	0	0	0	0	0	0	0	0	0	0	0		0	0	1	5	4	0	0	1	87	0	0	yes
adlib_Sample_3893_AT_7	CTTCCTTCATGACGTT-1	adlib	ad_libitum_fed	Singlet	neuron	Sall3_class	0	0	0	0	0	0	0	0	0	0	0	0		0	0	0	0	0	1	38	1	62	0	0	yes
adlib_Sample_3893_AT_7	CTTCCTTGTAACACGG-1	adlib	ad_libitum_fed	Singlet	neuron	magnaclass1	0	0	0	0	1	73	0	0	0	0	1	0		1	56	1	79	66	1	7	0	0	0	0	yes
adlib_Sample_3893_AT_7	CTTCCTTGTCCACTCT-1	adlib	ad_libitum_fed	Singlet	neuron	magnaclass2	0	0	0	0	0	0	0	0	0	0	1	0		1	55	0	0	0	0	0	1	21	0	0	yes
adlib_Sample_3893_AT_7	CTTCCTTTCTCAACGA-1	adlib	ad_libitum_fed	Singlet	neuron	magnaclass1	0	0	0	0	0	0	0	0	0	0	0	0		0	0	1	92	51	1	11	0	0	0	0	yes
adlib_Sample_3893_AT_7	CTTCCTTTCTGTCTCG-1	adlib	ad_libitum_fed	Singlet	neuron	monoamine_class	0	0	1	19	0	0	0	0	0	0	0	0		0	0	0	0	0	0	0	0	0	0	0	no
adlib_Sample_3893_AT_7	CTTCGGTAGCCTGCCA-1	adlib	ad_libitum_fed	Singlet	neuron	magnaclass2	0	0	0	0	0	0	0	0	0	0	0	0		0	0	0	0	0	0	0	0	0	0	0	no
[truncated: 46,132 more rows]
