# Supplementary material for: A unified rodent atlas reveals the cellular complexity and evolutionary divergence of the dorsal vagal complex
Source: eLife. 2025 Oct 7;14:RP106217. doi: 10.7554/eLife.106217 (PMC12503491; doi:10.7554/eLife.106217)
Supplement: Supplementary file 6. — Neurons were subset and reprocessed before labeling at layer-3 granularity. The MAST algorithm (Finak et al., 2015) was used through Seurat v5 (Hao et al., 2024) on scaled data with a log fold-change threshold of 0.25 and detection threshold on ≥40% of cells on each neuronal cluster at resolution 1.0. We searched the resulting gene expression markers in the literature and compiled them. We then based the names for our cell identities on these genes. [file elife-106217-supp6.xlsx]

## Sheet: S6
Identity	Upregulated genes (markers)	Downregulated genes	Peculiarities	References
Preganglionic class	Slit3 Isl1 Chat		Isl1 is practically only expressed in neurons of this neuronal class
Preganglionic1 (Cluster 28)	Chat Prph Tbx20 Slc5a7 (Cht) Syt17 Adam12 Myo1b...		All cells in the cluster express Slit3. Besides acetylcholine they co-release Phox2b and can co-release potentially any neurotransmitter alone or in combination (glutamate, glycine, nitric oxide, etc.). It is cluster 36 in Dowsett et al. due the expression of Cdh8, Atp10a and Tbx20 (this is the only cluster expressing it) since the other preganglionic cluster in this dataset does not express thes…	M.Q. Ludwig, W. Cheng, D. Gordian, J. Lee, S.J. Paulsen, S.N. Hansen, et al., A genetic map of the mouse dorsal vagal complex and its role in obesity, Nat Metab. 3 (2021) 530-45. 10.1038/s42255-021-00363-1. / G.K.C. Dowsett, B.Y.H. Lam, J.A. Tadross, I. Cimino, D. Rimmington, A.P. Coll, et al., A survey of the mouse hindbrain in the fed and fasted states using single-nucleus RNA sequencing, Mol M…
Preganglionic2 (Cluster 32)	Chat Slc5a7 (Cht) Prph Tns1 Anxa4 Aox1...		Should be parasympathetic. A very transcriptomically different group of cells. Besides acetylcholine they can co-release other neurotransmitter and neuropeptides alone or in combination (glutamate, glycine, nitric oxide, etc.). These neurons seem to be the equivalent to cluster Chat2 of Ludwig et al, as they express very high Aox1 and medium Htr7 and Ccbe1.	M.Q. Ludwig, W. Cheng, D. Gordian, J. Lee, S.J. Paulsen, S.N. Hansen, et al., A genetic map of the mouse dorsal vagal complex and its role in obesity, Nat Metab. 3 (2021) 530-45. 10.1038/s42255-021-00363-1. / G.K.C. Dowsett, B.Y.H. Lam, J.A. Tadross, I. Cimino, D. Rimmington, A.P. Coll, et al., A survey of the mouse hindbrain in the fed and fasted states using single-nucleus RNA sequencing, Mol M…
Corelautus-class			Very few genes are genuinly upregulated in the nuclei
Cmss1 (Cluster 15)	Gm42418 Cmss1 Cdk8	Apex2 Clvs2 D630045J12Rik Fam120c Lrrfip2...	Very few genes are genuinly upregulated in the nuclei, instead there is a large amount of downregulated genes compared to all other clusters. The marker genes of colon fibroblasts’ archetype called “metabolism/immune” are upregulated in this cluster: Lars2, Camk1d and Cmss1. It has few cells express very high cholinergic marker Ache. A subset of cells express high Nefl and Atp1a2. Cdk8 is related…	J.N. Campbell, E.Z. Macosko, H. Fenselau, T.H. Pers, A. Lyubetskaya, D. Tenen, et al., A molecular census of arcuate hypothalamus and median eminence cell types, Nat Neurosci. 20 (2017) 484-96. 10.1038/nn.4495. / M. Adler, N. Moriel, A. Goeva, I. Avraham-Davidi, S. Mages, T.S. Adams, et al., Emergence of division of labor in tissues through cell interactions and spatial cues, Cell Rep. 42 (2023) …
Gabra6 (Cluster 29)	Gabra6 Fat2 Lhfp Il16 Reln...		This is the only cluster with cells expressing the GABA receptor GABRA6 and expressing IL-6 which has been found in cervical ganglia (sympathetic neurons). Although IL6 expression is found across all neuron clusters in this dataset.	K.K. Kummer, M. Zeidler, T. Kalpachidou, M. Kress, Role of IL-6 in the regulation of neuronal development, survival and function, Cytokine. 144 (2021) 155582. 10.1016/j.cyto.2021.155582. / P. März, J.G. Cheng, R.A. Gadient, P.H. Patterson, T. Stoyan, U. Otten, et al., Sympathetic neurons can produce and respond to interleukin 6, Proc Natl Acad Sci. 95 (1998) 3251-6. 10.1073/pnas.95.6.3251.
pH-related (Cluster 30) Is a class itself	Atp1a2 Slc4a4 (NBCe1) Slc1a2 (EAAT2) Slc39a12 Slc6a11 (GAT3) Sox6...		Genes upregulated have been implicated in pumping of Na+/K+ (Atp1a2) and clearance/uptake of glutamate (Slc1a2) and GABA (Slc6a11). In addition to genes involved in the Na+ and bicarbonate ions across the plasma membrane (Maintaining pH). This is the only full cluster expressing Shroom3. It specially expresses Slc6a9, which is a glycine importer.	D. Lutz, G. Loers, R. Kleene, I. Oezen, H. Kataria, N. Katagihallimath, et al., Myelin basic protein cleaves cell adhesion molecule L1 and promotes neuritogenesis and cell survival, J Biol Chem. 289 (2014) 13503-18. 10.1074/jbc.M113.530238. / V.T. Cheli, D.A. Santiago Gonzalez, V. Spreuer, V. Handley, A.T. Campagnoni, P.M. Paez, Golli Myelin Basic Proteins Modulate Voltage-Operated Ca(++) Influx …
Golli-related (Cluster 27) Is a class itself	St18 Prr5l Mag Mobp Mbp Aspa...		They express heavily genes related to myelin-formation (Mag, Mobp, Mbp). Those have been described in voltage regulation in neurons. In addition, some genes have been described to regulate migration (Prr5l) and morphology (St18) which may be implicated in neuronal identity conservation. A cluster like this has been described in the central amygdala.	C.E. Vaaga, M. Borisovska, G.L. Westbrook, Dual-transmitter neurons: functional implications of co-release and co-transmission, Curr Opin Neurobiol. 29 (2014) 25-32. 10.1016/j.conb.2014.04.010. / N.X. Tritsch, A.J. Granger, B.L. Sabatini, Mechanisms and functions of GABA co-release, Nat Rev Neurosci. 17 (2016) 139-45. 10.1038/nrn.2015.21. / C.F. Landry, J.A. Ellison, T.M. Pribyl, C. Campagnoni, K…
Mixed neurons 1 (cluster 1) Is a class itself (Lrmda class)	Lrmda Col19a1 Kcna1 Trim43c Syt2...	Camk2a Trpm3 Ebf1 Fnbp1l...	Notably, this does not belong to either of the magnaclasses as almost lacks of expression of VGLUT genes and has very little inhibitory neurotransmitters evidence of releasing. They have expression of parvalbumin and Kcna1. All mixed neurons are characterized by very low expression of Camk2a, Baiap3 and Slc16a2.	J.N. Campbell, E.Z. Macosko, H. Fenselau, T.H. Pers, A. Lyubetskaya, D. Tenen, et al., A molecular census of arcuate hypothalamus and median eminence cell types, Nat Neurosci. 20 (2017) 484-96. 10.1038/nn.4495.
Magnaclass 1	Gad2 Gad1 Pax2 Nrxn3 Slc6a5 Slc32a1	Nrn1 Slc17a6 Cacna2d1 Adcyap1 Tmem163	Mainly inhibitory cells (GABA and Glycine releasers). Although some cells co-release excitatory neurotransmitters (e.g. glutamate, acetylcholine). It includes clusters 0,2,3,6,7,11,17.
NFI (Cluster 14)	Nfib Nfix Zfpm2 Chd7...		It is enriched in the chromatin associated Chd7, but the rest of the markers do not give a clear function. It expresses all Nfia, Nfib and Nfix. NFI transcription factors have been described during cerebellar development. Although it has very few expression of Nfic.	C. Plachez, C. Lindwall, N. Sunn, M. Piper, R.X. Moldrich, C.E. Campbell, et al., Nuclear factor I gene expression in the developing forebrain, J Comp Neurol. 508 (2008) 385-401. 10.1002/cne.21645. / J. Fraser, A. Essebier, A.S. Brown, R.A. Davila, D. Harkins, O. Zalucki, et al., Common Regulatory Targets of NFIA, NFIX and NFIB during Postnatal Cerebellar Development, Cerebellum. 19 (2020) 89-101…
COE (Cluster 12)	Ebf2 Ebf3 Fbxl7 Kcnmb2 Fign...		Ebf genes are related to diferentiaton during CNS development and some years ago it was published: “It is worth noting that ebf3 and ebf2, in contrast to ebf1, are expressed in the progenitors of fbm neurones, but not in mature or migrating neurons”. Fbxl7 has been described to have a role in mitochondrial membrane potential and cellular bioenergetics. In cancer cells, its activation correlates w…	L. Dubois , A. Vincent, The COE--Collier/Olf1/EBF--transcription factors: structural conservation and diversity of developmental functions, 108. 3-12 (2001) 10.1016/s0925-4773(01)00486-5. / Y. Liu, T. Lear, O. Iannone, S. Shiva, C. Corey, S. Rajbhandari, et al., The Proapoptotic F-box Protein Fbxl7 Regulates Mitochondrial Function by Mediating the Ubiquitylation and Proteasomal Degradation of Sur…
Zeb2-Kcnmb2 (Cluster 10)	Kcnmb2 Nfib Sema3a Utrn Neto1 Ebf3...		It is the only neuronal cluster with cells expressing Col23a1. It expresses Ebf3, and a subset, Ebf1. It almost lacks expression of Camk2a. A subset of this cluster is equivalent to cluster 23 of Dowsett et al. (2021).	G.K.C. Dowsett, B.Y.H. Lam, J.A. Tadross, I. Cimino, D. Rimmington, A.P. Coll, et al., A survey of the mouse hindbrain in the fed and fasted states using single-nucleus RNA sequencing, Mol Metab. 53 (2021) 101240. 10.1016/j.molmet.2021.101240.
Zeb2-Spon1 (cluster 5)	Zeb2 Tcf4 Spon1 Mcc Dscaml1 Arhgap15 Adarb2 Bcl11a...		Most of the markers are expressed in developing brain but only Tcf4 is described in the adult brain. A small subset of cells seem to be the equivalent of cluster 7 found by Zhang et al. (2020) because they differentially express Insrr, Gpr139, Ntrk1, Gad2, Tmem132d. Another subset seems to be cluster 6. A bigger subset that includes the Zhang clusters, is called GABA5 by Ludwig et al. (2021) and …	M.Q. Ludwig, W. Cheng, D. Gordian, J. Lee, S.J. Paulsen, S.N. Hansen, et al., A genetic map of the mouse dorsal vagal complex and its role in obesity, Nat Metab. 3 (2021) 530-45. 10.1038/s42255-021-00363-1. / G.K.C. Dowsett, B.Y.H. Lam, J.A. Tadross, I. Cimino, D. Rimmington, A.P. Coll, et al., A survey of the mouse hindbrain in the fed and fasted states using single-nucleus RNA sequencing, Mol M…
Zeb2-Zfp831 (Cluster 8)	Zeb2 Pde1a Rftn1 Gm26871 Adra1a...		A subset of this clusters shows high syncronicity with cluster 7 in the high expression of its main markers Ebf3, Efb1, Arhgap6, Gm15261 and Ankfn1. In addition many of the cells with high expression of the dopamine receptor D2 (Drd2) and other with high somatostatin belong to this cluster. It seems to be or contain cells described in cluster 17 of Dowsett et al. (2021)	G.K.C. Dowsett, B.Y.H. Lam, J.A. Tadross, I. Cimino, D. Rimmington, A.P. Coll, et al., A survey of the mouse hindbrain in the fed and fasted states using single-nucleus RNA sequencing, Mol Metab. 53 (2021) 101240. 10.1016/j.molmet.2021.101240.
A-M2 (Cluster 3)	Sema3a Dach1 Fbxl7 Gm32647 Adarb2 Trpc3 Pcdh9 Nos1ap...	Arpp21 Gm26871 Ldb2 Ebf1 Ghr Camk2a Prkg1...	Called AM2 for the main two differential transcripts. Cells seem to be close to mixed neurons, but they have more specific markers. Adarb2 has been described as a major branch of inhibitory neurons in the cortex without somatostatin, but here a small subset of these cells express high somatostatin. Also, a subset expresses Cck and parvalbumin. A subset expresses very high Rora transcripts. It see…	G.K.C. Dowsett, B.Y.H. Lam, J.A. Tadross, I. Cimino, D. Rimmington, A.P. Coll, et al., A survey of the mouse hindbrain in the fed and fasted states using single-nucleus RNA sequencing, Mol Metab. 53 (2021) 101240. 10.1016/j.molmet.2021.101240. / R.D. Hodge, T.E. Bakken, J.A. Miller, K.A. Smith, E.R. Barkan, L.T. Graybuck, et al., Conserved cell types with divergent features in human versus mouse …
Mixed neurons 2 (Cluster 2)	Gad2 Npas3 Slc6a5...	Ebf1 Dach1 Vav3...	The cells share many expression markers with clusters in both magnaclasses, but they are mainly inhibitory. All mixed neurons are characterized by very low expression of Camk2a, Baiap3 and Slc16a2.	J.N. Campbell, E.Z. Macosko, H. Fenselau, T.H. Pers, A. Lyubetskaya, D. Tenen, et al., A molecular census of arcuate hypothalamus and median eminence cell types, Nat Neurosci. 20 (2017) 484-96. 10.1038/nn.4495.
Sall3-class	Sall3 Gbx1 Rab38 Pdzd2 Mgll Cacna2d3	Gabra1	It contains clusters 21, 25 and 6. They share additional expression features among the magnaclass 1 group: Pdzd2, Mgll, and almost exclusively Sall3, Gbx1 and Rab38, as well as lack of the GABA receptor marker Gabra1. It has been described that Sall3 modulates DNMT3B and participates in epigenetic programming and differentiation in neurons. It is also described in GABAergic neurons.	T. Kuroda, S. Yasuda, S. Tachi, S. Matsuyama, S. Kusakawa, K. Tano, et al., SALL3 expression balance underlies lineage biases in human induced pluripotent stem cell differentiation, Nat Commun. 10 (2019) 2175. 10.1038/s41467-019-09511-4. / F. Morello, D. Borshagovski, M. Survila, L. Tikker, S. Sadik-Ogli, A. Kirjavainen, et al., Molecular Fingerprint and Developmental Regulation of the Tegmental …
Sall3-Nox4 (Cluster 6)	Gulp1 Mgll Mcc Nrp1 Rbm20...		Many of the cells with high expression of the dopamine receptor D2 (Drd2) belong to this cluster. A subset of this cluster heavily expresses Rorb. Another subset is equivalent to cluster 26 of Dowsett et al. (2021).	G.K.C. Dowsett, B.Y.H. Lam, J.A. Tadross, I. Cimino, D. Rimmington, A.P. Coll, et al., A survey of the mouse hindbrain in the fed and fasted states using single-nucleus RNA sequencing, Mol Metab. 53 (2021) 101240. 10.1016/j.molmet.2021.101240.
Sall3-Cdh3 (Cluster 21)	Nfib Maf Ndnf Lrtm1 Zeb2...		“Genes modulated by the greatest number of FGF-regulated miRNAs include DNA-binding transcription factors Nfib and c-Maf” in lens fiber cells. In addition: “seven miRNAs, including miR-9, miR-137, miR-200c, miR-381, miR-455, miR-495, and miR-543, target at least two (...) genes examined” (Wolf, et al., 2013). It seems to be equivalent to cluster 16 of Dowsett et al. (2021). It expresses very wide…	G.K.C. Dowsett, B.Y.H. Lam, J.A. Tadross, I. Cimino, D. Rimmington, A.P. Coll, et al., A survey of the mouse hindbrain in the fed and fasted states using single-nucleus RNA sequencing, Mol Metab. 53 (2021) 101240. 10.1016/j.molmet.2021.101240. / L. Wolf, C.S. Gao, K. Gueta, Q. Xie, T. Chevallier, N.R. Podduturi, et al., Identification and characterization of FGF2-dependent mRNA: microRNA networks…
Sall3-Rorb (Cluster 25)	Rorb Pde3a B130024G19Rik Phactr2 Gulp1 Sall3 Stac...		Rorb is expressed in sensory and circadian centers of the brain. In other parts, the neurons expressing Rorb receive input from ganglionic cells.	H. Liu, M. Aramaki, Y. Fu, D. Forrest, Retinoid-Related Orphan Receptor beta and Transcriptional Control of Neuronal Differentiation, Curr Top Dev Biol. 125 (2017) 227-55. 10.1016/bs.ctdb.2016.11.009.
Magnaclass 2	Slc17a6 Cacna2d1 Adcyap1 Tmem163 Nrn1	Gad2 Gad1 Pax2 Nrxn3 Slc6a5 Slc32a1	Mainly excitatory cells (Glutamate, serotonine, dopamine, etc. releasers). It also has the highest amount of cells synthesizing acetylcholine. Although some cells co-release inhibitory neurotransmitters (e.g. GABA). It includes clusters 1,4,5,8,9,10,13,15,16,18,19,20,24,25.
COE-Atp10a (Cluster 18)	Kcnh8 Sntb1 Atp10a Maf Adarb2 Mctp2 Ebf3 Ebf2 Ebf1 Casz1...		MafA is also expressed, but less found in nuclei and exclusively in this cluster. Excitatory cell clusters (But not gabaergic) in the spinal cord expressing Maf and MafA, were found to co-express Lmx1b. Those are necessary for somatosensory information including pain. It is the only cluster in the magnaclass 2 to heavily express Adarb2. Some cells express Ebf1, Ebf2 and Ebf3. A subset of the cell…	G.K.C. Dowsett, B.Y.H. Lam, J.A. Tadross, I. Cimino, D. Rimmington, A.P. Coll, et al., A survey of the mouse hindbrain in the fed and fasted states using single-nucleus RNA sequencing, Mol Metab. 53 (2021) 101240. 10.1016/j.molmet.2021.101240. / L. Dubois , A. Vincent, The COE--Collier/Olf1/EBF--transcription factors: structural conservation and diversity of developmental functions, 108. 3-12 (20…
COE-Pamr1 (Cluster 7)	Pamr1 Arhgap6 Ebf3 Ankfn1 Ebf2 Necab1 Gm15261 Ebf1...		Very characteristic Ebf factors expression pattern, the three are upregulated. Ebf genes relate to diferentiaton during CNS development. Also, Ebf1 and Ebf2 are expressed in Schwann cells (regulate myelination) and adipocytes. Postnatal POMC cells also retain expression of Ebf1. It is the highest cluster expression, and almost exclusively, of Efb2, A small subset of this cluster expresses CCK and…	M.Q. Ludwig, W. Cheng, D. Gordian, J. Lee, S.J. Paulsen, S.N. Hansen, et al., A genetic map of the mouse dorsal vagal complex and its role in obesity, Nat Metab. 3 (2021) 530-45. 10.1038/s42255-021-00363-1. / G.K.C. Dowsett, B.Y.H. Lam, J.A. Tadross, I. Cimino, D. Rimmington, A.P. Coll, et al., A survey of the mouse hindbrain in the fed and fasted states using single-nucleus RNA sequencing, Mol M…
GLP1 (Cluster 31)	Gcg Prlr Adamtsl1 Arhgap15 Zeb2 Syt10 Sulf1...		“In the brain, glucagon-like peptide 1 (GLP-1), encoded by the proglucagon Gcg gene, produced in a distinct population of neurons in the nucleus tractus solitarius (NTS), has been shown to regulate feeding behavior leading to the suppression of appetite.” (Singh et al., 2022). This group has been described to be part of the NTS as well as in other brain areas. The arcuate nucleus of the hypothala…	G.K.C. Dowsett, B.Y.H. Lam, J.A. Tadross, I. Cimino, D. Rimmington, A.P. Coll, et al., A survey of the mouse hindbrain in the fed and fasted states using single-nucleus RNA sequencing, Mol Metab. 53 (2021) 101240. 10.1016/j.molmet.2021.101240. / I. Singh, L. Wang, B. Xia, J. Liu, A. Tahiri, A. El Ouaamari, et al., Activation of arcuate nucleus glucagon-like peptide-1 receptor-expressing neurons s…
Ano2 (Cluster 34)	Ano2 D130079A08Rik Gm28376 Jph1 Foxp2 D130009I18Rik Lmo7 Cnih3...		Markers are very specific with very few expression in other neurons. It is a small cluster. Jph1 has not been described in neurons, but in skeletal muscle in mice. However, it is expressed by neurons of other species. Foxp2 has been described to participate in speech tasks in many species. Lmo7 has been described in hearing function and also is present in muscle.	L. Xiao, D.P. Merullo, T.M.I. Koch, M. Cao, M. Co, A. Kulkarni, et al., Expression of FoxP2 in the basal ganglia regulates vocal motor sequences in the adult songbird, Nat Commun. 12 (2021) 2617. 10.1038/s41467-021-22918-2. / T.T. Du, J.B. Dewey, E.L. Wagner, R. Cui, J. Heo, J.J. Park, et al., LMO7 deficiency reveals the significance of the cuticular plate for hearing function, Nat Commun. 10 (20…
Vglut1 (Cluster 16)	Slc17a7 (VGLUT1) Fam107b Col27a1 Lama1 Fam163a Lzts1 Cpne9...		The transporter VGLUT1 is almost exclusively expressed in this cluster, as well as Rorc. It has a very distinct expression pattern, with upregulation of genes related to delamination and migration during brain development (Lama1, Lzts1). This cluster is equivalent to cluster Glu12 of Ludwig et al. (2021) and cluster 27 of Dowsett et al. (2021). A subset of these cells express high Insrr. There is…	M.Q. Ludwig, W. Cheng, D. Gordian, J. Lee, S.J. Paulsen, S.N. Hansen, et al., A genetic map of the mouse dorsal vagal complex and its role in obesity, Nat Metab. 3 (2021) 530-45. 10.1038/s42255-021-00363-1. / G.K.C. Dowsett, B.Y.H. Lam, J.A. Tadross, I. Cimino, D. Rimmington, A.P. Coll, et al., A survey of the mouse hindbrain in the fed and fasted states using single-nucleus RNA sequencing, Mol M…
Lnc1 (Cluster 13)	D130079A08Rik D130009I18Rik Cdh9 Cadps2...		Enriched especially in lncRNAs.
Lnc2 (Cluster 22)	D130009I18Rik Ankfn1 Lmx1b Ebf3...		Enriched especially in a lncRNAs.
Lmo3 (Cluster 11)	Lmo3 Gm32647 Dach1 Dach2 Dchs2 Zic1...		Are one of the few clusters that co-express the “daschund” proteins Dach1 and Dach2. These cells belong to the magnaclass2, however they share many transcripts with the magnaclass1 clusters, like Tcf4 and Egfem1. A subset of these cells express high Insrr. In addition, it contains cells that are called cluster 25 in Dowsett et al. (2021)	G.K.C. Dowsett, B.Y.H. Lam, J.A. Tadross, I. Cimino, D. Rimmington, A.P. Coll, et al., A survey of the mouse hindbrain in the fed and fasted states using single-nucleus RNA sequencing, Mol Metab. 53 (2021) 101240. 10.1016/j.molmet.2021.101240.
Mecom (Cluster 33)	Mecom Csgalnact1 Kcns3...		There is a group of spinal motor neurons that express high Mecom.	E.S. Liau, S. Jin, Y.C. Chen, W.S. Liu, M. Calon, S. Nedelec, et al., Single-cell transcriptomic analysis reveals diversity within mammalian spinal motor neurons, Nat Commun. 14 (2023) 46. 10.1038/s41467-022-35574-x.
Mixed neurons 3 (Cluster 0)	Tmem163 Slc17a6 Arhgap24...	Cacna2d3 Egfem1 Gm32647 Nxph1 Vav3 Msi2 Ebf1 Camk2a...	The cells share many expression markers with clusters in both magnaclasses, but they are mainly excitatory. All mixed neurons are characterized by very low expression of Camk2a, Baiap3 and Slc16a2.	J.N. Campbell, E.Z. Macosko, H. Fenselau, T.H. Pers, A. Lyubetskaya, D. Tenen, et al., A molecular census of arcuate hypothalamus and median eminence cell types, Nat Neurosci. 20 (2017) 484-96. 10.1038/nn.4495.
Mixed neurons 4 (Cluster 17)	Grin2c Pou6f2 Osbpl3 Pcdh9...		According to a publication: “Pcdh9 mRNA was expressed in the fear extinction neurons (...) protein was often localised at synapses. Pcdh9 is involved in eliciting positive emotional behaviours, possibly via fear extinction neurons in the pBLA and/or synaptic activity in the hippocampal neurons, and normal optokinetic eye movement in brainstem optokinetic system-related neurons.” All mixed neurons…	J.N. Campbell, E.Z. Macosko, H. Fenselau, T.H. Pers, A. Lyubetskaya, D. Tenen, et al., A molecular census of arcuate hypothalamus and median eminence cell types, Nat Neurosci. 20 (2017) 484-96. 10.1038/nn.4495.
Monoamine-class	Ddc Phox2b Nrp2 Rnf220 Gm12828		Besides the preganglionic cells, only in these clusters are found nuclear Phox2b transcripts. Clusters 4, 26 and 19 have cells that express heavily Rnf220. Clusters 19 and 23 express heavily and almost exclusively, Gal.
M0 (monoaminergic 0) (Cluster 19)	Ddc 1700042O10Rik Rnf220 Tfap2b Gm12828 Parm1 Ston2...		Contains most cells expressing combinations of Ddc and Th, but it practically lacks the transporter VMAT2 (Slc18a2). It also has expression of Dbh and Tph2. These cells are likely dopaergic, dopaminergic and norepinephrinergic. A subset of this cluster expresses virtually exclusively the corticotropin-releasing hormone receptor 2 (CRHR2) and another subgroup, coexpress high levels of Gfral, ETV1 …	M.Q. Ludwig, W. Cheng, D. Gordian, J. Lee, S.J. Paulsen, S.N. Hansen, et al., A genetic map of the mouse dorsal vagal complex and its role in obesity, Nat Metab. 3 (2021) 530-45. 10.1038/s42255-021-00363-1. / G.K.C. Dowsett, B.Y.H. Lam, J.A. Tadross, I. Cimino, D. Rimmington, A.P. Coll, et al., A survey of the mouse hindbrain in the fed and fasted states using single-nucleus RNA sequencing, Mol M…
M1 (monoaminergic 1) (Cluster 26)	Ddc 1700042O10Rik Zim1 Nek10 Rgs9...		It follows exactly the same monoamine patterns as the murine M1: Contains most cells expressing combinations of Ddc, Th, Tph2 and VMAT2. It also expresses Dbh. A subset of this cluster seems to be equivalent to cluster Glu2 from Ludwig et al. (2021). Due marker expression and medium Th. A larger subset is equivalent to cluster 34 of Dowsett et al. (2021). And the subset containing Tph2 expression…	M.Q. Ludwig, W. Cheng, D. Gordian, J. Lee, S.J. Paulsen, S.N. Hansen, et al., A genetic map of the mouse dorsal vagal complex and its role in obesity, Nat Metab. 3 (2021) 530-45. 10.1038/s42255-021-00363-1. / G.K.C. Dowsett, B.Y.H. Lam, J.A. Tadross, I. Cimino, D. Rimmington, A.P. Coll, et al., A survey of the mouse hindbrain in the fed and fasted states using single-nucleus RNA sequencing, Mol M…
M2 (monoaminergic 2) (Cluster 23)	Synpr Gal 4930509J09Rik Rarb...		Contains some cells expressing combinations of Ddc, VMAT2, but not Th, Dbh and Tph2. The amount of cells is very small but this suggests that those release trace amines and are therefore monoamine-modulators. It has less clear differentially expressed genes than the other two members of the class. It is equivalent to cluster Glu6 of Ludwig et al. (2021) and cluster 22 of Dowsett et al (2021).	M.Q. Ludwig, W. Cheng, D. Gordian, J. Lee, S.J. Paulsen, S.N. Hansen, et al., A genetic map of the mouse dorsal vagal complex and its role in obesity, Nat Metab. 3 (2021) 530-45. 10.1038/s42255-021-00363-1. / G.K.C. Dowsett, B.Y.H. Lam, J.A. Tadross, I. Cimino, D. Rimmington, A.P. Coll, et al., A survey of the mouse hindbrain in the fed and fasted states using single-nucleus RNA sequencing, Mol M…
M3 (monoaminergic 3) (Cluster 4)	4930509J09Rik Gm20754 Cpne8 Rnf220...	Adarb2 Cacna2d3 Syt2 Nxph1...	Contains some cells expressing combinations of Ddc, Th, VMAT2, but not Dbh and Tph2. This suggests that these cells release trace amines and are therefore monoamine-modulators. It has less clear differentially expressed genes than the other two members of the class. A subset of this cluster resembles cluster Glu1 of Ludwig et al. (2021) due the expression of Ankfn1 and Sox6, and also cluster 20 o…	M.Q. Ludwig, W. Cheng, D. Gordian, J. Lee, S.J. Paulsen, S.N. Hansen, et al., A genetic map of the mouse dorsal vagal complex and its role in obesity, Nat Metab. 3 (2021) 530-45. 10.1038/s42255-021-00363-1. / G.K.C. Dowsett, B.Y.H. Lam, J.A. Tadross, I. Cimino, D. Rimmington, A.P. Coll, et al., A survey of the mouse hindbrain in the fed and fasted states using single-nucleus RNA sequencing, Mol M…
Lhx2-class	Lhx2 Pvalb Ebf1		It contains clusters 9, 15 and 20. They share additional expression features among the magnaclass 2 group: Pvalb, Ebf1, and exclusively Lhx2. They practically lack expression of Baiap3 and Ebf2, and have low expression of Nrp2. Many cells in this class express Cck and all clusters, parvalbumin.
Rorb-Maf (Cluster 24)	Maf Rorb Ebf3 Ebf1 Adam12...		Very few markers. Cells also express Ebf1 and Ebf3. Excitatory cell clusters in the spinal cord expressing Rorb were found to also co-express Lmx1b (But not in this dataset). Rorb is expressed in sensory and circadian centers of the brain. In other parts, the neurons expressing Rorb receive input from ganglionic cells. This and clusters 9 and 15 are the only ones that express Lhx2. With cluster 2…	L. Dubois , A. Vincent, The COE--Collier/Olf1/EBF--transcription factors: structural conservation and diversity of developmental functions, 108. 3-12 (2001) 10.1016/s0925-4773(01)00486-5.
Tpbg (Cluster 9)	Arpp21 Tshz2 Vav3 Gm2694 Nell2 Cfap54...		This and clusters 15 and 20 are the only ones that express Lhx2. This and cluster 15 express very high Grik1.
Paradoxic (Cluster 20)	Mylk B130024G19Rik Adamtsl3 Mctp2 Pde3a Lpar1 Pde5a...		These cells also co-express Cck, somatostatin and parvalbumin. This and clusters 9 and 24 are the only ones that express Lhx2, and with cluster 24 are the only ones in the magnaclass2 with many cells expressing parvalbumin. This and cluster 9 express very high Grik1. This is equivalent to cluster 30 of Dowsett et al. (2021). A subset of this cluster expresses almost exclusively Shroom3, along wit…	G.K.C. Dowsett, B.Y.H. Lam, J.A. Tadross, I. Cimino, D. Rimmington, A.P. Coll, et al., A survey of the mouse hindbrain in the fed and fasted states using single-nucleus RNA sequencing, Mol Metab. 53 (2021) 101240. 10.1016/j.molmet.2021.101240.
