# Supplementary material for: A unified rodent atlas reveals the cellular complexity and evolutionary divergence of the dorsal vagal complex
Source: eLife. 2025 Oct 7;14:RP106217. doi: 10.7554/eLife.106217 (PMC12503491; doi:10.7554/eLife.106217)
Supplement: Supplementary file 7. — Average log-normalized expression of the top 5 gene expression markers of each of our murine layer-3 cell identities (except duplicated genes n = 37, and mouse-specific genes n = 27; total genes included = 186) by rat DVC cluster at resolution 2.0. [file elife-106217-supp7.xlsx]

## Sheet: S7
gene	mouse_cell_identity	rat_cluster_2	rat_cluster_5	rat_cluster_12	rat_cluster_10	rat_cluster_13	rat_cluster_1	rat_cluster_8	rat_cluster_25	rat_cluster_16	rat_cluster_6	rat_cluster_4	rat_cluster_20	rat_cluster_15	rat_cluster_0	rat_cluster_17	rat_cluster_9	rat_cluster_11	rat_cluster_22	rat_cluster_7	rat_cluster_30	rat_cluster_23	rat_cluster_37	rat_cluster_19	rat_cluster_14	rat_cluster_38	rat_cluster_28	rat_cluster_35	rat_cluster_21	rat_cluster_3	rat_cluster_34	rat_cluster_40	rat_cluster_18	rat_cluster_29	rat_cluster_27	rat_cluster_32	rat_cluster_24	rat_cluster_33	rat_cluster_26	rat_cluster_31	rat_cluster_36	rat_cluster_39
Tmem163	mixed_neurons3	0.702406	4.21554	0.847043	0.0160383	0.0455656	0.837442	0.153545	1.14475	1.08723	1.10721	0.79794	0.0960181	3.19033	0.781297	3.95137	1.97725	2.36211	2.17001	1.81	3.78794	0.0764028	0.067161	0.793392	2.18178	3.26549	1.12862	0.471027	1.35069	0.0427134	1.51521	5.14003	1.05493	0.0629378	0.109468	1.93896	2.88254	0.0276545	3.51512	0.498699	2.19953	2.04943
Cacna2d1	mixed_neurons3	0.157208	12.947	0.130755	0.182747	0.336282	0.176802	0.518193	4.59822	3.73308	0.251483	0.143819	0.257863	13.6292	0.0934241	13.5949	0.14125	5.68907	5.27701	1.12415	0.262965	0.556836	0	0.263398	0.508743	3.21738	0.199548	0.116532	0.496572	0.0894302	5.30558	7.69863	0.567731	3.90963	1.42189	10.7919	16.9686	5.36646	11.8331	0.355206	5.20574	5.54165
Slc17a6	mixed_neurons3	0.195527	2.77245	0.307092	0.173319	0.0764563	0.284717	0.116494	1.11458	1.12594	0.223986	0.167574	0.0600991	2.63906	0.213455	2.92533	0.1795	1.03064	1.05092	0.118947	0.221841	0.110272	0.211304	0.314082	0.0888022	0	0.142662	0.599116	0.23288	0.155753	1.21463	0.167926	0.069805	0.301553	0.697388	0.35982	2.18046	0.0640755	2.58467	0.0485979	1.32547	1.12609
Csmd3	mixed_neurons3	1.21706	9.86749	1.39845	0.086147	4.32724	1.0835	9.12558	3.42963	8.22164	0.239777	0.937731	4.48673	11.9492	1.07719	6.56848	1.47825	11.7363	7.84705	0.197153	6.29495	4.92065	0.774584	0.632376	15.1575	0.0664297	0.372323	0	0.233866	0.96505	7.79494	1.76247	5.60046	0.171215	2.32515	6.66077	6.28065	11.1991	8.15023	1.01185	11.6666	6.30474
Dab1	mixed_neurons3	0.0360835	3.25452	0.0583386	0.100963	5.489	0.0429549	4.17911	0.965886	1.87834	0.0340326	0.0257853	1.18899	2.43811	0.0514983	2.5686	0.0510867	6.39744	3.2401	0.188866	1.60759	1.1762	0	0.0428335	5.42534	0.388006	0.0756744	0	0.0137945	0.221963	3.45774	8.34859	2.85676	0.128687	0.567982	5.2369	6.04055	8.60884	1.24571	0.103427	4.21744	2.01781
Syt2	mixed_neurons1	0.0734806	0.47532	0.133745	0.207604	0.146876	0.0823545	0.983946	1.65827	1.13307	0.105649	0.0828852	1.05432	0.800936	0.0886684	1.44434	0.0803283	1.76644	0.896171	0.118097	0	0.253795	0.0570737	0.0751625	0.0890784	0.124772	0.110574	0	0.0339199	0.0894132	0.849427	1.38738	1.47321	0.0584655	0.668657	0.12195	0.117923	1.74339	2.61589	0.0196724	0.900667	0.835495
Kcna1	mixed_neurons1	1.80719	0.142652	1.01969	0.0714385	0.0630069	1.37526	0.229887	1.10246	0.36233	1.04311	1.33978	0.626162	0.391815	1.11368	0.628608	1.43087	0.614654	0.486616	0.754406	0.814036	0.0751863	0.134322	0.872311	0.257285	0.282894	0.544784	0.233738	0.843868	0.272897	0.228709	0.109541	0.928354	0.305948	0.585105	0.0300709	0.0543871	0.598039	1.38494	0.556815	0.345256	0.43862
Cacna2d3	mixed_neurons1	0.213451	1.7121	0.158109	0.207063	6.82509	0.233388	10.729	11.7428	9.33193	0.187888	0.11612	31.8332	1.80259	0.262621	4.98303	0.197832	12.1831	7.65386	0.134571	2.14934	7.97809	12.2113	0.182372	5.35969	9.44241	0.345843	0.339412	0.125333	22.8147	8.30877	5.64637	24.7871	3.92921	2.25342	1.70273	8.78131	7.88328	4.99694	13.2363	8.22505	9.44369
Myo16	mixed_neurons1	0.0816291	1.04312	0.0999587	0.0166198	0.187938	0.0725508	1.68821	1.66382	3.08829	0.0673114	0.04155	2.20753	1.3011	0.127537	1.0352	0.272616	3.05663	1.84182	0.0785713	0.970196	3.55602	2.04356	0.0241967	1.64188	0.0787743	0.114727	0	0.0202211	0.655031	1.39004	0	4.47472	0	0.118759	1.35806	1.26264	1.78368	0.443515	0.27127	1.94552	1.20115
Kcnmb2	Zeb2_Kcnmb2	0.0113979	0.134697	0.00705653	0	0.102935	0.0113337	0.146366	0.266253	0.155597	0.0173028	0	0.277853	0.124431	0.0104545	0.0557643	0	0.119533	0.0939532	0	0	0.876302	0	0	0.00733676	0	0	0	0	0	0.050085	0.0887469	0.130436	0	0.0601609	0.0102686	0.213347	0	0.0129951	0	0.111369	0.266265
Utrn	Zeb2_Kcnmb2	0.951205	3.30397	1.31784	2.92171	1.7651	0.94554	2.24028	14.4273	3.96404	0.847177	0.970346	5.19677	2.71895	1.28565	2.08754	1.24349	2.65301	2.81269	1.07491	5.18517	8.23882	11.6764	0.798716	4.65215	6.80323	1.80119	4.5054	1.16388	11.6147	3.5813	1.22974	4.98918	47.0239	8.73194	1.06306	3.07552	8.28694	0.624654	7.66881	3.27673	5.19049
Neto1	Zeb2_Kcnmb2	0.0608083	1.68833	0.100406	0.0497447	1.62198	0.0595132	2.33224	6.4836	2.84953	0.0549447	0.0406386	2.73166	1.91518	0.0583446	0.839001	0.0601925	2.89864	2.35368	0.0495907	3.49107	9.50643	0	0.0666065	7.01288	0	0	0	0.018352	0.116799	2.65922	0	4.37983	0	0.508003	5.65745	0.646439	2.44442	0.025737	0	3.568	2.04911
Msi2	Zeb2_Kcnmb2	1.55865	5.27858	2.00083	3.52023	7.57557	1.63442	4.88808	7.30322	8.43139	2.00014	1.69542	4.6887	4.73072	1.53582	6.72542	1.54395	5.08536	4.70395	2.73233	4.68093	12.8941	26.518	1.38153	4.85213	13.1429	2.19476	6.17659	1.86718	25.2231	4.29146	5.2328	5.89508	7.29533	6.92908	9.65563	10.0851	3.88125	8.31443	14.9346	6.72996	9.48541
Grip1	Zeb2_Kcnmb2	0.07242	1.87075	0.2337	0.086642	2.38542	0.205007	2.26595	1.58126	2.26654	0.0995264	0.0720174	1.66586	1.81686	0.262994	1.56541	0.162711	2.87758	1.87043	0.0497972	0.401801	3.59322	2.45754	0.322222	1.0614	2.28579	0.158994	0	0.0424005	1.60945	2.25639	0	1.35632	0.109268	0.849621	1.37571	2.90852	4.05575	0.645878	0.96796	1.35724	2.04933
Klhl1	Lmo3	0.0682896	3.17473	0.0845533	0.0623097	0.678165	0.0719845	2.16007	2.19133	3.95847	0.108077	0.112423	0.671394	4.15865	0.117099	1.60951	0.143171	3.17319	2.0947	0.101694	0.0828142	1.67009	0.0960504	0.0876194	0.0930214	0.120832	0.0519998	0.231187	0.0204001	0.0625777	1.74158	0	0.856019	0	1.76245	5.27383	2.03032	2.0328	0.132452	0.0465972	3.44653	1.99843
Pcdh9	Lmo3	3.55051	0.671967	3.51274	0.146771	0.547843	3.32856	0.751226	0.750768	2.01666	2.80897	3.66688	0.843003	0.685373	3.35858	1.13638	3.48607	0.863009	1.17689	1.61332	1.38803	1.25916	0.661244	2.55669	1.13388	0.0724244	2.33552	0.0752553	1.74025	0.950134	0.649973	0.795414	1.12189	0.240369	0.318446	0.670959	0.84532	0.236016	1.01858	1.68873	0.90513	0.707714
Prex2	Lmo3	8.0915	1.02921	12.0093	0.0994371	1.55151	10.8654	0.630372	1.69276	2.03381	10.5236	13.0695	1.09198	3.73641	8.25337	1.2477	9.17583	0.976435	2.44956	9.52027	3.82086	0.741907	19.0202	8.94829	2.82422	6.66166	5.3125	0.0752553	7.99405	15.196	1.2012	0.323939	0.628598	11.8777	3.85548	2.62122	0.972228	1.00099	2.09946	11.9758	1.23131	4.76882
Lmo3	Lmo3	0.0598006	0.792103	0.0788084	0.0404305	0.539462	0.0469422	0.550184	0.836084	0.935883	0.0757322	0.0324042	0.403281	1.14253	0.0735998	0.415978	0.0749198	0.703743	0.548887	0.0213001	0.970888	0.23821	0	0	1.7483	2.21459	0.0221012	0	0.0615735	1.07436	0.561338	0.0958681	0.311064	0	0.166906	0.085391	0.309589	0.125628	0.0529591	0.670995	0.721773	0.870691
Ebf2	COE	0	0.056686	0.012991	0.00804319	0.0710786	0.0130688	0.0227962	0.0102874	0.865771	0.0151564	0	2.37092	2.50231	0	1.74044	0.00193418	0.040867	0.239381	0.00274033	0	0.108312	0	0	0	0	0	0.083158	0.039707	0.0525426	0.41959	0	0.00911719	2.08713	0.307533	0	0.0525538	0.0116035	0.0108375	0.0378753	0.151763	0
Pid1	COE	0.104262	3.29849	0.121095	8.31892	3.68512	0.0703878	4.04914	4.43532	5.82707	0.087432	0.0588545	5.04291	5.58245	0.175793	3.69821	0.092478	4.06182	3.70196	0.130152	3.31538	3.73202	1.53294	0.108729	8.22303	2.08483	3.73863	17.5499	0.0511108	5.02023	5.09931	1.42334	4.39014	12.6818	4.93567	3.10396	1.78382	2.69214	2.23519	2.89871	5.70552	3.95498
Fbxl7	COE	0.00991204	0.0194308	0	0	0.0424672	0	0.0147495	0.00947976	0.0325882	0.0125531	0.00957721	0.0237651	0.00546723	0.0295948	0.00875551	0	0.00486184	0	0.0313694	0.0249766	0.0955676	0	0	0.00840839	0	0	0	0.0443379	0.00881085	0.0910204	0	0.0314023	0	0.0994898	0.047996	0	0	0.00467983	0	0	0
Ebf3	COE	0.0302681	1.07305	0.0578777	0.147489	0.118757	0.0220734	0.489477	0.0525661	2.14903	0.0711301	0.0192357	4.24256	6.13595	0.0372945	2.63571	0.0355305	0.888517	1.14596	0.0237514	0	5.94671	0.182502	0	0.0547303	0.209596	0	0	0.0186405	0.029201	1.98984	0	0.482139	0.1068	0.389916	0.217045	0.201065	0.0906829	0.0764181	0.0232154	1.14712	0.934764
Gad2	COE	0.341643	0.21123	0.431866	0.396617	6.7197	0.328294	5.01964	0.149808	5.76843	0.335135	0.174044	5.49215	0.202857	0.542663	0.224431	0.285659	0.889019	2.00304	0.275022	1.82298	11.8376	0.117206	0.317044	3.97469	0.223902	0.278441	0.362504	0.17704	0.320775	3.70786	0.749905	2.60544	0.126016	0.50777	0.448619	0.201115	0.260749	0.0394422	0.130037	2.73161	2.85003
Miat	Lnc1	0	0.00421355	0	0	0	0	0.00133472	0	0	0	0	0	0.000429544	0	0.00487402	0	0.00241636	0	0	0	0.00901703	0	0	0	0	0	0	0	0	0	0	0.00168442	0	0	0	0	0.00680305	0	0	0	0
Nfib	NFI	2.64296	0.136707	3.3263	0.0697068	0.642653	3.21681	0.539622	8.68861	2.39271	3.81706	3.36443	4.44791	5.55462	2.66282	0.742389	2.45063	0.643488	1.07535	3.54904	5.1608	5.24202	5.97104	2.70644	7.36667	14.7652	1.50315	0	3.02783	8.84232	1.41007	9.45945	0.288237	1.5553	3.27874	0.147081	0.0895233	1.85501	1.49308	5.91083	2.75345	2.86553
Zfpm2	NFI	1.05906	1.36513	1.2537	0.0397655	0.322972	0.421833	2.44207	8.67265	2.94964	0.115667	0.435504	1.31526	1.60557	0.850639	1.71747	1.45079	2.69004	2.01232	0.0415521	2.79455	5.22531	10.2867	0.214061	6.24153	13.593	0.0670819	0.213015	0.0360185	7.5695	1.82094	8.33713	4.36315	0.20774	2.71105	3.53754	2.36407	2.37899	0.438243	5.04875	3.77884	3.75153
Chd7	NFI	3.61562	0.132157	4.14328	2.08566	0.398824	3.27486	0.278192	2.11301	1.20003	3.13796	3.24764	0.27289	0.89742	3.28762	0.361516	3.97537	0.364618	0.8356	2.25	4.23508	1.81933	0.999625	2.71612	3.17131	0.964734	2.23663	1.54951	3.15725	1.76197	0.857706	7.34436	0.237734	0.374882	0.607646	0.124911	0.316012	0.292752	0.483732	2.42996	1.19051	0.447303
Nfix	NFI	1.45176	0.00616104	2.22047	0.528675	0.0260049	1.8634	0.0943882	0.40095	0.221442	2.66405	1.98095	0.106733	0.420455	1.64025	0.0644573	1.63635	0.0164631	0.379138	2.7233	2.08456	0.58846	2.82974	2.06858	2.09933	3.71623	1.34205	0.546937	2.40278	1.8564	0.026995	0.927329	0.0236706	0.138389	0.858981	0	0.016298	0.237589	0.0345085	2.10759	0.533627	0.490806
Nfia	NFI	11.9635	0.4812	14.85	7.51954	0.240564	11.888	1.38675	3.6856	2.99765	10.4792	12.9467	1.35191	3.52648	11.8139	1.58559	13.6602	3.95921	3.27632	5.57852	8.36072	3.12065	25.5707	9.50816	12.6265	40.8182	8.94317	6.07105	6.50629	25.8961	2.37071	10.5087	2.87753	10.9754	8.97317	0.334863	0.644998	12.5997	1.88187	18.9543	3.97821	6.99905
Lars2	Cmss1	0.228002	0.509452	0.390819	0.347785	0.495217	0.31343	0.568721	0.522463	0.416389	0.310435	0.449778	0.479967	0.612573	0.321867	0.562144	0.360344	0.627545	0.538874	0.636512	0.411147	0.374559	0.827367	0.258674	0.46132	1.34851	0.426229	0.753216	0.424623	0.638097	0.523479	0.124008	0.568011	0.116489	0.375805	0.671384	0.637516	0.436101	0.649194	0.445544	0.306431	0.459502
Cdk8	Cmss1	0.174946	0.314433	0.168803	0.163817	0.286229	0.190773	0.327803	0.246416	0.314761	0.173827	0.189509	0.305251	0.34291	0.187468	0.347791	0.290382	0.318893	0.225517	0.162693	0.173944	0.39375	0.517731	0.312845	1.01933	0.0993443	0.234863	0	0.0537674	0.330226	0.334305	0	0.252369	0.281516	0.351301	0.27958	0.246059	0.3618	0.251697	0.134962	0.438784	0.431184
Cmss1	Cmss1	0.0987207	0.107838	0.0949965	0.0390286	0.11543	0.0855517	0.076781	0.0960505	0.0963422	0.0927358	0.126877	0.114453	0.16172	0.157148	0.171267	0.0805898	0.10477	0.0721921	0.141618	0.240293	0.0564082	0.127714	0.340999	0.0975413	0.0752474	0.14578	0	0.0802023	0.0527646	0.0172931	0.186428	0.144729	0.504202	0.256148	0.129518	0.149179	0.068273	0.228762	0.0733546	0.0869543	0.0847405
Gls	Vglut1	2.66035	4.79765	3.21717	3.0646	5.50677	2.32011	4.83683	19.3469	5.4947	3.06079	2.89264	4.49209	4.61857	2.78644	4.87645	2.56369	4.44053	4.21271	3.34217	3.05881	5.41852	1.66261	2.43018	3.15812	2.92251	2.71705	3.11175	3.54566	1.39303	4.40154	6.1559	4.39941	2.08086	3.90951	6.49572	5.65307	5.09184	5.32178	2.07174	4.47488	4.39456
Slc17a7	Vglut1	0.0885872	0.0151732	0.038212	0.0693362	0.00936813	0.0385931	0.0210561	3.1461	0.0542408	0.0415549	0.0149176	0.00375975	0.00160993	0.0592903	0.0380789	0.0374833	0.0101049	0.0271759	0.0267733	0	0.0672065	0	0.0217319	0.0537695	0	0	0	0.054881	0.0312145	0	2.11231	0.0126764	0	0.178596	0	0.00268669	0	0.0154679	0.044069	0.118879	0
Fam107b	Vglut1	0.0137296	0.0612991	0.0305498	1.02957	0.0865239	0.00473339	0.049813	0.260817	0.0627768	0.083218	0.0137162	0.0379744	0.0831003	0.00921112	0.055614	0.107861	0.0581696	0.0313083	0.571767	0.0229274	0.110799	0.175033	0.0187713	0.0129989	0.397918	0.727799	3.11291	0.199182	0.378765	0.139607	0.112158	0.00346276	2.47004	0.205281	0.13143	0.0862612	0.0963175	0	0.469653	0.032809	0.209953
Efr3a	Vglut1	0.987333	1.52418	0.991203	1.40622	1.58871	1.05982	1.82041	6.5784	2.29207	0.946698	1.03093	2.89062	2.19127	1.19354	2.86731	1.03083	1.97733	1.76552	1.07762	2.05989	2.61667	1.29712	1.20432	1.45981	2.08836	1.15487	2.19383	1.0274	1.94905	1.76049	3.35287	2.48509	1.45871	2.17962	0.967694	1.62026	1.43506	2.88483	1.16705	2.49507	1.60204
Col27a1	Vglut1	0.0182652	0.00865238	0.029999	0	0.0111059	0.0063857	0.0148694	0.140182	0.0174969	0	0.0199647	0.0430657	0.0673261	0	0.12211	0.270985	0.0160376	0.00533494	0.0963426	1.68574	0.0114835	0.409877	0	2.92435	5.77401	0.042115	0	0	0.177683	0.0308581	0	0.0340386	0.204176	0.263256	0	0.00241031	0.0421556	0.291607	0.0901984	0.561222	0.227622
Grin2c	mixed_neurons4	0.04823	0.179113	0.0151745	0.0377075	0.0360021	0.0177116	0.0400672	0.776222	0.959673	0.0127241	0.00951461	0.209732	0.172345	0.0628361	0.0503984	0.0272046	0.0984396	0.157874	0.013845	0.0437487	0.032746	1.34567	0.0251953	0.0307753	0	0	0	0.02213	3.12251	0.130127	3.57467	0.0128415	0	0	0.235933	0.0612831	0.0310022	0.00565901	1.99246	0.146551	0.766245
Pou6f2	mixed_neurons4	0.0698656	0.367463	0.113129	0.0346119	0.667636	0.0650861	0.541874	0.202027	0.649196	0.0617564	0.10038	0.165015	0.344292	0.0686473	0.276102	0.0502525	0.572367	0.29604	0.0393218	0.117743	0.333503	0	0.0663023	0.433127	0	0.027215	0.0851615	0.0440413	0.115141	0.49051	0	0.0931964	0	0.0478268	1.37043	0.310573	0.162859	0.14508	0.172157	0.293242	0.156962
Zfhx3	mixed_neurons4	0.0267685	3.43351	0.0791702	10.4377	0.172023	0.0542207	2.43276	0.335782	1.12876	0.168238	0.0830824	0.133329	0.312117	0.0148508	2.64112	0.0536251	2.00648	1.46869	0.385762	0.538337	0.149038	0.658492	0.134407	1.09154	4.24029	4.23251	5.02253	0.403209	0.655919	2.45828	0	0.190464	3.8189	1.39693	3.65554	3.90596	0.514942	3.52178	0.472975	1.95642	1.67364
Tenm2	mixed_neurons4	0.0994957	5.38125	0.121338	0.138273	5.78536	0.105683	4.61006	6.9269	8.75927	0.0800599	0.0641189	4.11768	3.50405	0.122888	5.78111	0.0616935	4.9501	4.66741	0.0419872	0.330753	5.51736	0	0.0928579	1.63093	0.37972	0	0.28441	0.0801678	0.178784	3.96929	0	9.00204	0	1.03616	8.22902	3.15858	1.08416	15.7654	0.242892	4.96102	4.22604
Atp10a	COE_Atp10a	0.559474	0.100726	1.14829	0.0102529	0.0945253	2.1317	0.0569584	0.149113	0.0506657	5.2065	2.75784	0.414672	0.18629	0.602594	0.780723	0.520627	0.0506852	0.368521	5.57343	0.486617	0.0486414	0	3.34702	0	0.790014	1.35233	0.782097	4.42553	0.00637985	0.115155	0	0.0448147	0.86886	2.68808	0.185253	0.0378494	0.00378533	0.0481191	1.69924	0.153744	0.0832872
Kcnh8	COE_Atp10a	0.203685	0.847574	0.208755	0.195863	0.491161	0.140364	0.668215	0.402997	0.64555	0.395944	0.184402	1.63696	1.85492	0.225813	2.68783	0.200848	0.928313	0.904746	0.778887	1.16161	0.310002	0.0790489	0.366523	1.96471	0.206069	0.170957	0.313911	0.560555	0.131549	0.495264	0.738887	1.52155	0	1.02662	0.873908	1.01111	0.910233	4.41971	0.14121	1.59347	0.312843
Ebf1	COE_Atp10a	0.0603824	6.92355	0.136704	0.111158	0.699953	0.0901017	1.44964	1.84203	4.73917	0.0567824	0.0619009	14.3251	12.4587	0.126016	25.6089	0.0807247	2.82314	5.75082	0.0421926	0.602044	0.703102	0.135766	0.0434832	2.66866	0.812991	0.063647	6.93795	0.0179705	0.139065	4.90336	10.4352	22.9708	58.7805	10.4415	5.32981	13.4652	6.0271	3.36972	0	8.15722	3.03411
Spock1	COE_Atp10a	4.86727	1.10735	4.67243	0.253852	0.798584	4.5881	0.964035	1.98705	0.865943	3.60014	5.19312	1.61236	1.04655	4.60085	3.02383	4.49697	1.12921	1.67921	2.87291	0.796321	0.792882	0.333481	3.39751	0.104038	0.657878	2.78203	0	2.85626	0.153776	0.972445	1.58683	1.76785	0.558669	0.377505	0.816487	0.729615	1.26199	3.94531	2.10442	1.19369	0.893076
Gabra5	COE_Atp10a	0.047087	0.739992	0.025531	0.0570938	0.433502	0.021971	0.720178	0.835912	0.547218	0.0218479	0.0150509	0.782266	1.15714	0.0424729	1.47873	0.0230389	1.03368	0.681558	0.0204065	0	0.178366	0.118053	0	0.036839	0	0	0	0.0200356	0.0520443	0.786611	0	0.748915	0	0.25792	0.354762	0.144586	0.491512	0.789567	0	0.391682	0.471716
Rnf220	M0	1.5537	0.847545	1.58682	0.471554	0.53356	1.67181	0.433541	0.474329	0.498986	1.96274	1.86033	0.500158	0.453272	1.6317	0.787871	1.37931	0.48328	0.768398	3.0622	0.701677	0.602626	0.0428934	2.3332	0.559886	0.0743273	0.677863	0.810459	2.96614	0.326076	0.479165	0.205747	0.472062	0.452023	1.45603	1.5243	2.56396	0.962744	0.289762	1.198	0.540705	0.669603
Camk2a	M0	0.00527535	1.81015	0.0440383	0.0053769	1.34999	0.0226213	1.23009	0.772324	0.64262	0.0112883	0.0142282	2.43153	2.69684	0.0206642	2.71576	0.013767	0.558899	1.5995	0.0281705	0	0.349506	0	0.015037	0.0997395	0.160885	0	0	0.0396729	0.030699	1.28034	0	2.83626	0	0.369939	0.697913	6.25306	0.0722955	2.70823	0.0378753	1.41431	0.979158
Parm1	M0	0.629206	0.509675	0.564485	0.0506186	0.900657	0.518068	0.683412	0.195113	0.523613	0.419766	0.493956	0.208718	0.51908	0.478685	1.17508	0.678173	1.03093	0.551368	0.510229	0.156042	0.382394	0.0919489	0.642421	0.126511	0	0.284399	0.249474	0.461025	0.0131016	0.486415	0.90512	0.256551	0.10707	0.206513	0.25676	3.52741	0.47625	0.170077	0.643094	1.04863	0.7056
Pbx3	M0	2.23367	3.82682	2.81541	2.44316	6.79178	2.77151	3.26048	1.23415	2.52122	5.09453	3.50894	4.1213	3.27998	1.99382	4.62607	2.00767	4.02541	3.86952	7.31184	1.36078	0.692959	1.99665	3.96451	1.20433	1.6027	2.71684	4.26698	5.67365	1.5838	3.81846	1.7933	2.27809	1.32329	2.0881	1.29366	10.5257	3.94715	6.55269	2.68645	3.40103	4.71996
Ddc	M0	0.00698437	0.155781	0.0427786	0.036264	0.00856555	0.0357834	0.0535892	0.00841343	0.00828185	0.0191834	0.0138077	0.00935149	0.154714	0.0238295	0.106317	0.0350552	0.0765548	0.0540612	0.0402378	0.0691176	0.0106922	0.0570737	0.0902218	0.0252222	0.0614571	0	0	0.0210735	0.00770232	0.200933	0	0.0509626	0.130086	2.08058	0.291845	6.69729	0.0619365	0.0131866	0	0.274752	0.332046
Nrxn3	mixed_neurons2	0	0.0004633	0	0.013061	0.0335581	0	0.0308634	0	0.0201337	0	0	0.019563	0.000753541	0	0.0093789	0	0.014892	0.0108305	0	0	0.0456026	0	0	0.0124746	0	0	0	0	0.01039	0	0	0.0230414	0	0	0	0	0	0.0318642	0	0	0.0242407
Slc6a5	mixed_neurons2	0.0866316	0.112741	0.222542	0.210506	1.29788	0.152992	2.31948	0.0683011	1.61816	0.0668948	0.0857371	2.9735	0.0805333	0.299844	0.0547392	0.169	1.68017	1.05128	0.0927995	0.0482411	1.22322	0	0.219739	0.154734	0.153102	0.209596	0	0.136246	0.109841	1.24089	0	3.91103	0.429362	0.533114	0.120481	0.100478	0.0338613	0.0379078	0.0250913	1.16912	0.565462
Gabrb1	mixed_neurons2	0.0975104	11.4328	0.194041	0.200421	12.9656	0.150554	13.8936	1.70636	7.88682	0.135131	0.0900635	5.34188	6.95885	0.138583	4.34316	0.130606	9.81609	8.97393	0.123858	0.598221	8.18192	39.7326	0.262943	3.20127	5.70918	0.0546911	0	0.120323	37.5788	10.3165	0.189286	5.10174	0.186696	2.37104	22.4772	8.94086	10.4538	0.441249	19.9427	9.29673	14.8575
Mylk	paradoxic	0.0275663	0.0648748	0.00254881	0.95256	0.0450277	0.0181299	0.109492	0.0560344	0.0659245	0.108922	0.0106842	0.0870365	0.104341	0.0318084	0.327309	0.0284958	0.0705504	0.0932757	1.4617	0.173613	0.103358	0.150087	0.0517373	0.00587621	2.40244	0.629872	0.306887	0.383168	0.137215	0.217966	0	0.25201	3.95586	0.400021	0.0692483	0.10384	0.145639	5.35864	0.207104	0.0216879	0.0923805
Elmo1	paradoxic	7.73344	2.03606	10.6055	17.8586	4.83167	8.62315	3.22542	3.91213	2.49619	8.1973	9.51223	3.65502	5.38746	6.52561	5.30082	9.01942	3.86528	4.30822	7.96546	15.995	3.08796	0.0857868	6.12737	5.03525	5.27469	11.8308	15.1989	7.27157	0.148457	4.6956	2.46879	6.08348	0.466824	2.75409	0.88327	0.870677	4.55405	10.6294	3.5573	4.5917	2.21846
Vav3	paradoxic	0.0854487	3.39802	0.0189732	0.0875016	1.38911	0.044903	1.50625	1.64243	2.52744	0.0990392	0.0287324	1.73452	2.46865	0.0804943	5.29422	0.0416572	2.44236	1.84082	0.0613129	0.0961868	4.05234	0	0.0611984	0.211622	1.62873	0.157553	6.59115	0.148433	9.66371	2.02481	0	1.89402	0.175663	1.44881	2.0964	4.14397	3.07071	18.6614	5.34917	1.64958	5.06136
Slc24a3	paradoxic	0.0147222	0.867031	0.0386188	0.096752	1.09535	0.00961075	0.678264	0.394479	0.42542	0.0149311	0.0163508	0.510567	1.34232	0.0186231	1.76657	0.0239725	0.573888	0.591613	0.0167818	0.415039	1.04239	0.258682	0.022169	0.684333	0.281752	0	0	0	0.897641	0.559821	0	0.548472	0.358296	0.529049	0.158455	0.783449	0.16421	2.91562	0.355376	0.858886	1.06116
Kcnip1	paradoxic	3.01248	4.8899	3.03012	0.187237	2.39696	2.30953	4.84207	2.03842	1.67857	0.745242	2.90024	3.92432	9.26768	2.89186	8.65813	3.83629	5.35733	4.90393	0.903877	1.23094	0.189648	2.27531	1.0615	3.98674	0	1.27356	0	0.646931	5.55386	3.98109	0	5.34864	0.18806	0.345668	0.955628	5.47341	2.35711	37.1447	4.01676	5.18625	7.46052
Apba2	Sall3_Cdh3	0.145622	1.96841	0.158071	0.21731	2.35001	0.258068	2.49623	4.48399	2.49646	0.252499	0.134141	5.98017	2.41098	0.262056	2.43713	0.4486	2.22192	2.25885	1.55825	2.43943	2.83253	5.71041	0.253807	2.25112	0.27944	0.29682	0.254251	0.497756	1.70724	1.93714	3.1124	3.55918	0.121849	1.22773	2.11107	1.17553	3.64867	1.46838	1.03457	2.71727	2.49459
Grm3	Sall3_Cdh3	72.3713	3.70965	95.7757	0.307799	5.38856	64.1406	3.55415	0.508385	2.07863	45.4658	74.2655	12.7696	3.94004	66.9904	2.65888	83.2647	2.28269	13.1269	14.4055	13.1271	8.83489	2.44799	44.9876	0.321807	1.33301	36.9704	0.834046	26.8706	5.51368	4.87403	0.238829	6.28768	39.1039	1.57946	9.04653	7.21981	0.688819	1.79813	21.5857	2.08472	2.45558
Maf	Sall3_Cdh3	0	0.0239679	0	1.13861	0.0203105	0.00739973	0.00832706	0.0282368	0.0152606	0.00523513	0.00385359	0.309449	0.0169712	0.0149038	0.195063	0.0160727	0.0218607	0.00852282	0.0117926	0	0	0	0	0.0509581	0.343337	0.698406	1.84854	0.0229121	0.0367942	0.134872	0.214777	0.056621	0.145074	0.180965	0	0	0	0.0143821	0	0	0
Mcc	Sall3_Cdh3	0.650058	0.325479	0.774428	0.561375	0.637396	0.715849	0.273383	0.228105	0.197663	0.442195	0.791609	0.320821	0.134511	0.652956	0.234842	0.809675	0.340679	0.395169	0.492078	0.209339	0.176011	1.31024	0.310857	0.383051	1.43458	0.525374	0	0.370289	0.493728	0.548282	0	0.497031	0	0.980108	0.754244	0.626922	0.437364	0.171299	0.608429	0.215785	0.383879
Dpp10	Lnc2	0.260003	3.16279	0.392547	0.0407531	2.26795	0.138006	2.84582	1.53556	2.62932	0.0653447	0.214822	1.12343	3.99639	0.421757	2.8195	0.656183	3.07751	2.48183	0.0499589	1.75777	0.66298	0.138612	0.141112	2.45571	0.231627	0.158091	0	0	0.0798694	2.83719	0.109541	2.75294	0	1.09815	2.43665	3.56947	2.20044	1.44926	0.247611	3.58041	2.01235
Lmx1b	Lnc2	0	0.943041	0	0	0.0102247	0.0062384	0.0300954	0.00383377	0.0234502	0.00612983	0	0.0189569	1.78286	0	0.415756	0	0.186181	0.334641	0	0	0	0	0.0206895	0	0	0	0	0	0.00517518	0.259314	0	0.00800361	0	0	0.0523088	1.18912	0.0116035	0.00506195	0	0.136846	0.387216
Vwc2	Lnc2	0.0257791	1.87927	0.0394433	0.014202	0.930936	0.0401205	2.26476	2.45661	1.5512	0.0376673	0.0116029	0.433488	3.0272	0.0573337	1.87363	0.0600842	2.89257	1.77545	0.0225816	1.63185	0.14555	0	0	2.98744	0.142845	0.0339916	0	0	0.183151	2.26154	0	0.983793	0.08608	0.316086	0.749452	1.29534	1.64282	1.36959	0.119465	1.84462	1.83116
Rarb	M2	0.0143315	1.33918	0.0617386	0.0163992	1.60354	0.0293635	0.695751	0.502097	0.700041	0.0118177	0.0118884	1.08775	0.421686	0.021946	1.2512	0.0256541	1.0202	0.791398	0.00805142	0.0849772	0.586137	0.352764	0.0553794	0.0636541	3.11333	0	0.192201	0.0177172	0.552463	1.01563	0	0.687848	1.6051	0.75685	0.801544	5.21025	0.72496	1.91313	0.837204	1.46142	0.423561
Gal	M2	0.0531057	0.552007	0.0531086	0.0925173	0.0105615	0.0247602	0.0695866	0.0051296	0.00991122	0.0555475	0.0506533	0.121454	0.0283226	0.0606207	0.0354668	0.0459271	0.00312477	0.0681728	0.0246738	0.0578376	0.0157255	0	0.0251155	0.0460815	0	0.0716063	0	0.0276073	0.040041	0.0315583	0.320412	0.0140909	0	0.249408	0.0992366	0.0989209	0	0.00933892	0	0.26573	0.0617128
Efna5	M2	0	2.65002	0.0308873	0.0202379	2.72196	0.0174978	2.25874	2.29288	1.02542	0.0460021	0.0180455	1.68571	2.74581	0.00995362	3.12482	0.0096767	2.35497	1.88618	0.00809688	0	2.30522	0.954324	0	0.0411783	4.04751	0	0.1708	0.0201328	0.746578	1.60457	0	2.4926	0	1.31126	8.96592	3.89003	1.81462	2.76887	0.238438	2.00096	2.35344
Nell2	M2	0.234946	2.30335	0.28419	0.344666	0.802978	0.129871	1.0733	1.20938	1.05488	0.0824381	0.119713	0.47715	1.55018	0.250697	4.42551	0.236908	1.07125	1.19529	0.118561	1.30152	0.301141	0.22773	0.194984	2.60591	0	0.086241	3.0921	0.059816	2.51792	1.22019	6.92153	0.205707	0	1.73506	2.93423	8.29882	6.45567	1.8834	0.795448	2.40908	1.07297
Rorb	Rorb_Maf	0.0948226	0.484362	0.123628	0.0225285	0.101999	0.114761	0.419989	0.0986137	0.514654	0.20332	0.107946	0.485305	0.165615	0.152514	2.13978	0.0915669	0.443076	0.336439	0.132887	0.266392	0.166575	14.0946	0.064061	0.612253	8.2283	0.114026	0.107399	0.162355	15.5024	0.495499	0.259624	0.857958	0.105866	0.684102	0.568126	0.0963286	0.219551	0.481164	9.20435	0.318208	3.83396
Lrrc4c	Rorb_Maf	6.12797	10.0872	7.79152	0.308275	8.85845	5.45108	10.4852	7.11757	7.72865	4.30138	6.71733	9.27145	9.46653	5.45013	9.34444	7.29831	11.3785	9.53519	5.48734	9.28832	11.1836	2.26008	3.85807	16.8935	4.16785	3.17015	0.191146	3.67481	8.99856	7.89296	4.64994	12.7956	10.1373	2.03115	9.75836	5.81215	7.08065	1.85089	6.55151	11.1064	8.59124
Hdac9	Sall3_Rorb	0.0455145	2.42851	0.0757077	14.3676	4.86713	0.0905349	3.01007	1.19524	2.64792	0.111824	0.0597392	6.09655	3.19499	0.125516	6.59662	0.0775887	2.20963	3.23732	0.104317	0.945201	2.30567	4.80841	0.0835426	3.56098	1.61916	5.92122	18.3487	0.0270029	4.23126	5.7789	0.811087	5.06222	2.17052	3.27249	4.30536	6.28029	3.66218	1.13347	2.41066	3.90651	3.121
Pdzd2	Sall3_Rorb	4.92449	0.80676	5.14546	0.220361	2.31318	4.23332	2.64767	2.48148	1.75718	1.99854	4.44843	4.50409	2.01835	4.72327	3.63241	5.18179	0.98719	2.68187	0.490061	2.24684	4.56015	0.298231	2.39856	2.62512	1.56675	2.40248	0.335959	0.702047	0.306604	1.42041	0.611383	7.15794	11.6151	2.23095	0.704541	0.487242	0.514828	0.652795	1.38677	2.42845	1.69368
Phactr2	Sall3_Rorb	0.0648566	0.484923	0.0643371	0.662209	0.247016	0.0548118	0.301377	0.667734	0.431467	0.0429358	0.0901892	0.734683	0.570568	0.0569636	0.558203	0.0707558	0.456827	0.440298	0.228153	0.0912325	0.718429	0.433552	0.193359	0.141701	1.54727	0.869818	2.5709	0.126923	0.303726	0.310711	0	0.377421	3.00655	2.78787	1.00657	0.887514	0.904464	1.72553	0.431933	0.304266	0.53464
Rai14	Sall3_Rorb	0.0197277	0.0270583	0.0892551	0.0170311	0.0998378	0.0757439	0.0356414	0.0222903	0.0191649	0.139169	0.11962	0.0819578	0.0412834	0.0328063	0.13657	0.0415056	0.0329986	0.0218477	0.032899	0	0.152128	0.0991355	0.0862564	0.00966415	0.532728	0.135487	0.133207	0.0982778	0.253552	0	0	0.0662925	0.181776	1.67999	0.0239272	0.0193791	0.0904935	0.00288504	0.106871	0	0.176499
Tmcc3	M1	3.37317	1.00104	3.39557	31.0151	2.46919	3.29906	1.25693	0.287961	0.46428	2.80033	3.48728	1.33032	0.851715	2.71504	1.19304	3.10802	0.772258	1.62596	3.30057	1.48789	0.362195	3.05272	2.37918	1.61591	5.77675	14.4964	8.18877	2.88191	3.14583	5.39571	0	1.69383	1.97828	0.582123	2.76309	3.97795	1.25512	0.219696	3.35311	1.39257	1.70197
Plp1	Golli_related	163.707	2.10424	48.9744	10.5266	2.47094	136.465	1.80811	1.11843	1.70916	113.943	118.775	2.24112	2.17001	137.959	2.02687	122.812	1.22615	18.3427	89.8229	47.0626	2.65741	6.96567	125.705	6.43806	12.4138	68.0268	12.2631	116.956	6.14644	1.50849	9.37188	1.83379	15.3582	10.9495	1.6477	2.29731	1.16742	2.41601	45.3711	1.77871	1.95667
Mbp	Golli_related	75.6988	1.05249	75.4141	3.02633	1.03577	78.0067	0.897264	0.788164	0.843758	83.1653	79.2488	1.09599	1.09261	73.9661	1.07756	80.1186	0.817589	12.4267	89.3936	25.4535	1.28807	3.66566	77.8665	1.57799	2.42315	46.1455	4.42719	82.6146	1.24746	1.06395	2.50563	1.01835	5.27909	6.08392	1.01866	1.12183	0.692725	1.5658	37.8433	1.37713	0.472602
Prr5l	Golli_related	2.6633	0.00337923	3.39034	0.19518	0.00404379	3.33908	0.0119617	0.0176892	0.0152994	4.9516	4.0408	0.0143697	0.0261007	2.36051	0.0371657	2.69127	0.00840891	0.49512	6.79145	0.6398	0	1.06848	3.37392	0.0512961	2.09629	1.92659	0.285712	4.52021	0.0558499	0	0	0.00589265	0.248584	0.337781	0	0.0131358	0.00378533	0.0455294	1.78725	0.0278084	0.0362201
St18	Golli_related	10.5846	0.0560252	12.829	0.0791702	0.0672191	10.8715	0.105838	0.239253	0.217361	12.1406	12.7322	0.0832383	0.0810069	9.42614	0.0799618	10.7614	0.0670704	1.82312	11.0563	2.94004	0.124821	0.152948	10.163	0.0342774	0	6.21063	0.341657	10.3293	0.0572444	0.0700101	6.50303	0.0441216	0.793184	0.236994	0.0231313	0.0563948	0.11461	0.0539902	4.9561	0.0287436	0.0125469
Tbx20	preganglionic1	0	0	0	0	0	0	0	0	0	0	0	0	0	0	0	0.00773129	0	0	0	0	0	0	0	0	0	0	0	0	0	0	0	0	0	0	1.40426	0	0.0277618	0	0	0	0
Prph	preganglionic1	0.243011	0.157867	0.174129	0.134082	0.0547115	0.0865655	0.0800267	0.0180825	0.115442	0.102721	0.0677234	0.05882	0.0382227	0.123908	0.113233	0.102501	0.0798935	0.061264	0.0637358	0	0.0993251	0.0833667	0.127027	0.13092	0	0.0926022	0.257865	0.0792279	0.0421031	0.0943821	0.170765	0.0517305	0	4.86336	7.60543	0.137523	3.60899	0.0741142	0.115956	0.0747513	0.0795347
A4galt	preganglionic1	0	0	0	0	0	0	0	0	0	0	0	0	0	0	0	0	0.00100593	0	0	0	0	0	0	0	0	0	0	0	0	0	0	0	0	0.166565	0.106138	0	0.0113849	0	0	0	0
Ablim1	preganglionic1	0.0558709	2.11995	0.0464681	0.102904	1.09779	0.0663033	2.13295	6.02156	2.9017	0.0605713	0.0326544	1.3551	1.93117	0.064316	2.21599	0.080485	2.51529	1.60652	0.0424283	0.0609883	1.43298	4.94159	0.0395215	0.116378	1.01531	0.0848572	0.662737	0.0570602	3.43388	1.94994	7.43269	1.1165	6.17561	4.96677	5.85449	2.38036	6.13299	1.73528	2.22642	1.58775	2.31712
Slc5a7	preganglionic1	0.0999993	0.33447	0.0611293	0.0702684	0.625448	0.0251706	0.174081	0.0485476	0.268031	0.0376637	0.0354705	0.15311	0.117282	0.0747654	0.137736	0.0697745	0.0792654	0.118994	0.0529155	0.552213	0.268817	0.0768191	0.048339	0.0832141	0.0603792	0	0.286607	0	0.0542463	0.148641	0	0.0348312	0.250222	2.8668	2.6974	0.219822	2.96482	0.0137181	0.0178201	0.180527	0.0623158
Chn2	Gabra6	3.40145	0.653098	2.78361	14.2576	0.644598	3.15858	0.605033	1.65413	0.704863	5.52273	3.47326	0.620355	0.523241	3.00898	0.72656	4.41437	0.959997	1.11085	7.22777	10.2968	0.487699	0.0768191	3.79221	0.335683	0.196439	8.87645	9.48012	6.43346	0.193081	2.84805	45.6217	0.172972	0.591251	2.14113	0.714771	0.469991	0.375854	0.878441	2.90015	0.663829	0.73753
Camk4	Gabra6	0.0118094	2.28983	0.0726708	0.0296076	0.972436	0.00279156	2.23284	3.48743	2.74656	0.0337873	0.0482082	1.6392	1.54473	0.0604955	1.41249	0.0675168	3.02776	2.1558	0.0226924	0	4.75159	0.135766	0.0570355	0.392449	0	0.051402	2.84831	0.0683358	0.04367	1.76402	21.1083	1.7985	0	0.773301	1.30884	1.4032	0.0939188	1.84903	0	1.75277	1.93222
Fgf14	Gabra6	0.299234	9.95116	0.27608	0.260569	7.45734	0.149452	9.32536	7.63421	8.82962	0.195072	0.142921	7.575	9.4894	0.199289	7.94595	0.252033	9.68958	7.42322	0.211429	0.789536	9.71739	3.81646	0.223025	2.64505	0	0.0670987	0.192201	0.287656	1.67198	7.84518	11.6053	8.009	0.10707	1.27717	13.8122	11.9633	8.37987	9.27261	0.725166	7.39071	7.17535
Cnksr2	Gabra6	0.268276	3.71044	0.374004	0.221534	1.78593	0.29079	3.11711	1.13946	2.5139	0.261104	0.277188	2.09704	3.99516	0.331336	3.17598	0.292543	3.56618	2.89859	0.302822	0.877343	2.7477	0.418673	0.439226	1.92692	0.235896	0.31322	0.466023	0.282935	0.409227	2.56642	15.9625	3.74398	0	1.57483	3.54302	2.6549	1.97509	2.51297	0.12047	2.51381	2.21794
Dach1	A_M2	0.0383708	1.73754	0.0671413	0.102375	0.526752	0.0556629	1.5622	7.99871	10.3335	0.069737	0.0310188	1.56125	8.8456	0.0320901	3.57904	0.0467964	2.26641	2.902	0.0296927	0.278684	13.2277	0.533265	0.0471579	1.16233	12.847	0	0	0.0878102	0.0924735	2.82385	0	8.5939	8.16923	2.50359	2.68488	0.897341	3.12582	0.570952	0.0440137	1.43199	3.57723
Esrrg	A_M2	0.0437476	0.708738	0.0691075	0.655797	0.490884	0.0797908	1.16258	4.19674	2.67051	0.0729118	0.0412117	0.958075	1.00671	0.183349	1.55856	0.0646314	2.00937	1.24266	0.0800021	0.452783	6.71409	1.30313	0.0979832	0.425122	9.40889	0.193925	0.358088	0.210489	1.79398	0.937186	0.279746	2.34405	0.0614322	2.22143	0.550228	0.501928	1.53801	1.4799	0.937993	1.41541	2.07305
Atp1a2	pH_related	0.476426	0.171103	0.327631	0.342247	0.160887	0.402496	0.0860925	0.0762911	0.109852	0.278008	0.221345	0.103367	0.174399	0.406127	0.0841139	0.351222	0.0782439	0.0939013	0.205999	0.915509	0.20151	5.97409	0.424989	3.42428	0.179004	0.358636	1.02106	0.333479	25.7994	0.0435851	0.141543	0.1052	30.6643	2.51006	0.136664	0.276428	0.0762323	0.0495779	15.3108	0.619744	6.41244
Wdr17	pH_related	0.0429892	0.432633	0.0293249	0	0.796088	0.0256042	0.444209	0.12028	0.233398	0.035087	0.0299013	0.323627	0.497813	0.0718079	0.291934	0.0518011	0.130345	0.303261	0.140056	0.0647685	0.241075	0	0.0241967	0.0721696	0.087241	0	0	0.049126	0.0405431	0.36919	0	0.168539	0	0.0697496	0.413732	0.828421	0.15109	0.0521213	0.0178201	0.268015	0.408453
Slc1a2	pH_related	0.0294431	0.0849907	0.0352614	0.0435145	0.10158	0.0232495	0.0808025	0.0159937	0.0484815	0.0234752	0.0167565	0.0374147	0.0890799	0.0337483	0.0540363	0	0.013919	0.0931645	0.0137933	0.164944	0.0369268	2.15557	0	0.662246	0.466272	0	0.198618	0.0184335	7.85356	0.0850246	0	0.215316	0.152147	0	0.00413419	0.0464333	0.0290552	0.00698576	4.37225	0.26797	1.31383
Slc4a4	pH_related	0.155949	0.499293	0.260086	0.138016	7.36823	0.124278	0.558739	1.59867	0.670375	0.177743	0.127696	0.883829	0.537141	0.114812	1.05936	0.160027	1.01964	0.620965	0.129976	0.0962365	0.519075	50.0659	0.083962	0.208879	42.7328	0.205034	0.240819	0.102155	54.7871	1.33168	17.1416	1.15452	0.0747977	1.40142	1.56309	2.05751	2.57624	1.17522	34.9982	0.840674	12.2678
Gcg	GLP1	0	0.00186434	0.0161911	0	0.00467935	0.012648	0	0	0.00341558	0	0	0	0.00575109	0	0	0.0129217	0	0	0	0	0.00457561	0	0	0	0	0	0	0	0	0.073178	0	0	0	0	0.026517	0	0	0	0	0	0
Zdhhc14	GLP1	6.35343	2.25794	8.0379	3.0202	2.35009	6.22142	1.95275	2.94634	1.93188	7.90358	8.12532	1.49451	1.81525	5.90623	2.08944	8.16862	1.47824	2.32824	8.48173	6.93034	1.97145	1.27105	6.48594	2.40229	0.0523478	4.73072	4.86279	6.53436	1.11418	2.11271	3.81606	1.7204	2.73929	0.67176	3.83984	4.27309	1.10024	1.29729	3.53779	2.10681	1.46009
Prlr	GLP1	0.0132641	0.616708	0.0163139	0.0400512	0.327866	0.0191108	0.831006	0.0290825	0.493335	0.00783993	0.00949614	0.26181	0.412174	0.0188749	0.219719	0.0286784	0.468502	0.517752	0.00971284	0	0.309674	0	0.0300398	0.0192946	0	0	0	0.029554	0.00381683	0.716033	0	0.166213	0	1.08392	0.182443	0.595229	0.12204	0.00821883	0	1.21044	0.698934
Rgs20	GLP1	0.0348437	0.115465	0.00997072	0.0134964	0.0790863	0.0349001	0.197853	0.047787	0.0897557	0.00897771	0.0199805	0.207995	0.314298	0.0198113	0.0727401	0.0223046	0.120394	0.149032	0.0138176	0.935861	0.506653	9.00115	0	3.75878	1.82927	0.0679833	0	0	5.73335	0.248747	0.316857	0.440175	0.181858	0.20664	0.0172432	0.0823258	0.0122442	0.0853123	3.54727	0.685745	1.29571
Adamtsl1	GLP1	0.0147414	0.364663	0.0499197	0.0108053	0.101077	0.0287106	0.366539	0.0174699	0.116929	0.0631993	0.0517681	0.493293	0.149781	0.00937608	0.511823	0.0144369	0.451976	0.205859	0.650558	0.307944	0.246028	1.32847	0.0153096	0.26212	0.270631	0	0	0.15889	0.0317907	0.0482688	0	0.210722	0	1.03665	0.071212	0.732134	0.00923177	0.158012	0.179246	0.477867	0.47503
Prune2	preganglionic2	0.0163378	0.779361	0.111006	0.686046	1.08819	0.00540694	1.00526	0.797443	0.891	0.163797	0.045315	0.789928	0.746916	0.0178164	1.03342	0.022834	1.11736	0.81344	0.65445	0.510891	0.636656	1.81584	0.0797098	0.89717	0.317459	0.260346	0.814236	0.1772	0.387561	0.892117	2.73737	0.787425	0.05169	0.347137	2.80026	1.65429	5.05995	1.44048	0.434427	0.955655	0.80219
Slit3	preganglionic2	0.0306496	0.477793	0.0271362	0.0728216	0.83679	0.0228235	0.580334	1.36627	1.15198	0.0196075	0.0242128	0.103725	0.433492	0.0313176	0.421348	0.00552987	0.688756	0.329372	0.0210414	0.148696	0.903428	0.138612	0	0.791785	0	0.03885	0.0942436	0.0405593	0.0603167	0.490623	1.4428	0.159668	2.36392	0.498318	10.1319	0.671749	31.369	0.231313	0.065389	0.723977	0.435056
Aox1	preganglionic2	0.016221	0	0	0	0.0179371	0.03286	0.00958615	0.0174589	0.00566763	0.0153402	0.0223808	0.00483975	0.00846399	0.00878457	0.00925823	0.0180852	0.0524048	0.0158272	0.0631559	0	0.0294732	1.78385	0.0218516	0	5.88184	0.132861	0	0	0.824108	0.0397106	0	0.00841941	0.115931	0.22987	0	0.0216603	0.814619	0.0165006	0.548115	0	0.120357
Mecom	Mecom	0	0.117165	0	0.014678	0	0.0251651	0.0964707	0	0.0413913	0	0.00435317	0.00598355	0.00991444	0.00745388	0.00739906	0	0.322187	0.0427986	0	0	0	0.0822314	0	0	0.175179	0	0	0	0.0703347	0.225297	0	0.00413977	0.05169	0.502327	0	0.00241031	0	0	0.0406673	0.0873295	0.330503
Htr2c	Mecom	0.271555	8.85174	0.232228	0.367886	3.19987	0.228453	14.1455	0.285096	12.3933	0.261376	0.22927	1.91378	11.9877	0.309152	5.15017	0.300871	12.4046	9.20018	0.131431	0.333385	3.41952	0.235559	0.234241	0.286291	0.547365	0.234278	0.0713582	0.409177	0.173978	8.99465	0.349705	6.96367	0.0943717	24.7991	1.73126	0.644648	5.95802	0.389916	0.137646	5.3245	5.76755
Kcns3	Mecom	0.0259595	0.300632	0.00943337	0.0163064	0.157634	0.0554325	0.34262	0.0353794	0.357665	0.0367823	0.0295142	0.102535	0.323763	0.0675242	0.263927	0.0255639	0.651175	0.279694	0.0559049	0.043244	0.0217884	0.0902755	0.0281836	0.0153676	0	0	0	0.019148	0.00693541	0.475978	0	0.173149	0.159927	0.107889	0.332263	0.051838	0.061198	0.0201044	0	0.271169	0.458342
Erbb4	Mecom	8.02752	4.52568	9.65802	0.114868	4.93903	7.11633	3.0009	3.08645	3.22624	4.81461	8.50237	1.53218	3.32144	6.57941	6.7345	8.7958	4.3177	3.794	1.60891	6.04229	3.27505	5.66956	4.08857	7.09782	6.32741	3.99824	0.0752553	2.12173	8.63902	3.10779	0.888339	1.48376	0.492988	2.25586	0.796595	4.6795	0.326118	0.38733	5.82181	5.51923	4.85995
Nrcam	Ano2	0.225058	3.34632	0.274628	0.230032	2.76743	0.182913	3.36663	6.25181	3.7013	0.140561	0.116946	5.29217	2.63412	0.304735	5.11768	0.186089	3.1802	2.85476	0.144148	11.7406	4.04782	4.12225	0.209957	18.5734	3.3977	0.026191	0	0.137153	5.4623	3.98325	4.2356	3.10104	0	1.35569	2.45855	4.66525	4.21749	7.46723	3.30794	6.75244	4.08909
Rims4	Ano2	0	0.600914	0	0	0.495848	0	0.612434	0.430255	0.666942	0.00464277	0	0.547928	0.737027	0.0085605	0.714737	0.00451685	0.552271	0.46501	0	0.143273	0.667526	0.175099	0.0260726	0.216759	0.730068	0	0	0.0172675	0.0477645	0.472869	0.728642	0.501047	0	0.277861	0.721923	1.00008	0.0472177	0.337861	0	0.556961	0.7985
Stac	Ano2	0	0.291045	0.0127975	0.00601099	0.0468956	0	0.246713	0.01122	0.279729	0.00453136	0.0102983	0.773845	0.369244	0	0.281923	0	0.20998	0.361033	0.0049479	0	0.634122	0	0.015037	0	0	0	0.166316	0	0.00806279	0.33484	0	0.709286	0	0	0.587461	0.697827	0.0152458	0.0822577	0	0.21273	0.393082
Negr1	M3	0.733336	30.6076	1.00466	3.91083	37.2472	0.671507	21.5709	3.44953	13.1007	0.958945	0.707776	21.992	23.7975	0.74434	14.4972	0.665375	14.3457	18.9345	2.58925	6.53888	13.9448	24.1098	0.826213	13.55	14.4404	2.78658	9.04533	1.2375	20.6694	22.9962	49.32	12.6965	0.765101	4.6793	21.9337	49.2568	4.69708	2.74332	12.6983	17.5675	19.4739
Zfhx4	M3	0.172861	7.09282	0.0857054	0.163374	1.45999	0.0876163	5.26433	0.105197	1.94285	0.0895834	0.100288	1.16596	3.56908	0.14055	4.32047	0.140317	3.88217	3.76429	0.0786111	0	2.65051	0	0.132471	0.021442	18.6518	0.0825043	0.671919	0.106302	0.116492	2.26054	0	3.54958	0.0629378	2.93365	9.40783	4.34963	0.302734	2.88979	0	3.39551	3.81027
Zeb2	Zeb2_Spon1	30.9679	2.12726	40.1034	18.1437	11.7135	32.2843	3.66268	0.137301	0.622795	37.3717	37.0029	7.4662	1.40129	30.6894	0.739203	32.3069	1.47217	7.26836	34.806	27.6809	2.77055	4.44656	34.2095	10.2944	4.48068	26.0949	19.7739	36.3218	3.76429	5.19821	0.112158	0.705693	15.1167	3.18119	0.304513	1.21949	1.6908	0.572754	16.5381	4.57489	3.45587
Tcf4	Zeb2_Spon1	9.32055	3.09613	12.4677	7.68896	13.5587	9.24159	3.43603	13.5872	8.68296	10.0736	10.7919	6.79461	16.0403	9.08101	4.52909	11.3502	2.52187	5.05461	11.6032	14.1974	8.53612	15.0601	8.73713	18.7473	7.08043	9.12484	4.48462	10.175	17.2831	7.34484	20.1487	1.93492	17.6499	10.6709	2.18386	3.06391	1.5484	1.64451	14.9257	6.83017	6.66789
Ptprm	Zeb2_Spon1	3.13592	5.48153	3.51535	1.34241	11.9783	2.86687	6.45838	4.18633	5.04439	3.08854	3.77337	7.63759	6.25742	3.10644	6.88087	3.54943	8.14809	6.00907	3.87943	2.14538	2.62374	6.22674	3.10496	4.19416	2.68052	3.14088	2.83334	2.58149	7.43032	6.73544	0.238829	5.03416	4.96518	6.7669	4.99741	3.14897	5.3733	2.83297	5.75385	6.22501	6.69861
Map2k6	Zeb2_Spon1	0.0876134	0.59798	0.113381	1.44466	7.78248	0.190009	0.55367	0.856348	0.539781	0.244345	0.168543	1.56896	0.993925	0.110397	0.641143	0.245912	0.733505	0.588131	0.820649	0.916024	0.876326	1.65882	0.217197	1.35797	0.597848	0.604113	1.02457	0.4461	2.23159	2.03224	0.572971	0.469145	0.0835757	0.607029	0.439029	0.717262	0.692926	0.749296	1.90589	1.19836	1.37153
Gulp1	Sall3_Nox4	0.0346491	1.22666	0.0431513	0	1.74888	0.0666666	1.17673	1.5584	0.463039	0.0932668	0.0587873	0.554153	1.58219	0.0326037	0.749713	0.0223469	1.13549	1.41301	0.359656	0.348022	1.10829	2.4819	0.0863324	0.365275	5.44564	0.180162	0.212644	0.219142	3.84199	0.869804	3.699	4.45273	2.93059	2.98759	0.420438	0.33929	0.0718302	0.00987218	2.36721	0.807674	1.27253
Dscaml1	Sall3_Nox4	6.39746	3.20656	8.22023	0.035746	8.63551	7.68669	6.52519	3.55383	2.58042	5.11074	8.03277	10.261	1.78146	6.71175	0.53226	6.12041	2.08606	5.95618	1.50308	12.6501	3.82639	0.244376	5.82731	8.92301	0.278236	3.85895	0.441202	3.2291	0.116477	4.61165	1.65262	8.96194	0.516814	0.544174	0.543576	2.99757	0.136198	0.171972	1.87061	4.50174	2.90583
Grin2a	Sall3_Nox4	0.0689586	0.760552	0.125003	0	1.20081	0.126203	1.84912	1.38159	1.05151	0.111683	0.0769594	2.94696	1.71022	0.0940159	3.07403	0.0737705	1.63133	1.98099	0.071458	0.0927954	0.735867	0.0499151	0.131447	0.0991224	0.172199	0	0	0.0224048	0.104398	1.12659	5.16169	6.33496	0	0.25155	2.61099	1.58957	2.43566	0.400097	0.0576513	1.66831	1.03266
Arhgap6	COE_Pamr1	0	0.0991688	0	0.248883	0.0263495	0	0.054502	0.0101578	0.0161231	0.00459782	0.00369978	0.0822994	0.182987	0	0.0242212	0	0.0461422	0.0532455	0	0	0	1.07604	0	0.0440106	0.155911	0.0472791	0	0	0.4021	0.105485	0	0.00392431	0.462305	0.00680982	0.429641	0.0429227	0.193132	0.0220127	0.246983	0.0163504	0.314431
Pde1a	Zeb2_Zfp831	0.0296669	0.859484	0.0249684	0	1.1917	0.0405177	0.481975	0.0459548	0.265685	0.0241204	0.023203	0.566719	0.647362	0.0374059	0.263441	0.0533383	0.203386	0.470908	0.00771461	0.580234	0.3297	0	0.0278865	1.4308	0	0	0	0.0354619	0.0149797	0.567122	0	0.117728	1.33043	0.189729	0.604395	0.397625	0.357751	0	0	0.778824	0.65684
Baiap3	Zeb2_Zfp831	0.0990701	1.97364	0.0759357	0.0941778	2.10791	0.103897	1.35668	0.0281495	0.272357	0.0670377	0.0603537	0.976565	1.28294	0.0837496	0.328314	0.0838821	0.172872	0.958612	0.0306557	0	0.227931	0	0.119545	0.0661088	0.0676567	0.0358032	0.181205	0.0858854	0.0725464	0.709526	0.122594	0.202079	1.15423	0.303483	0.829133	1.89259	0.0458681	0.0368992	0.103119	0.895602	1.18915
Plcxd3	Zeb2_Zfp831	0.120923	2.38535	0.306729	0.0980192	7.88277	0.22881	5.99091	7.59823	5.09687	0.181069	0.197442	10.3296	4.69344	0.186775	2.481	0.118337	3.06819	3.46657	0.090618	0.273229	5.40692	0.0991355	0.123668	0.335328	0.087241	0.147747	0.281698	0.138917	0.102425	4.21777	9.49589	3.99862	0.273227	1.14611	3.48737	1.35615	2.84664	2.00943	0.10952	3.50561	3.28391
Arpp21	Tpbg	0.0287373	3.72648	0.0875536	0.0592472	1.70906	0.0415964	2.05356	9.96052	2.01481	0.0495513	0.0383409	4.76889	10.3403	0.120935	12.8535	0.0786024	2.74241	3.56203	0.103105	2.5069	3.73432	0.137923	0.0455017	2.56161	0	0.11988	0.510497	0.126616	0.0558914	3.08957	6.1491	9.09875	0.237311	0.922887	0.87281	2.92776	2.20043	15.8467	0.118076	4.01345	2.57296
Tshz2	Tpbg	0	0.0246655	0	0	0.0123669	0.00535031	0.023332	0	0.0111037	0	0.00531042	0.00515915	0.0261614	0.00912126	0.120469	0	0.0254902	0.03241	0	0	0.00593854	0	0	0	0	0	0	0	0.00283359	0.0333817	0	0.0611306	0	0	0	0.040173	0.0218276	0.0636614	0	0.0642415	0.0253331
Celf2	Tpbg	3.07702	10.8594	3.86337	15.2221	5.21284	2.23222	7.78834	10.8483	6.51718	0.956673	2.28321	13.3939	16.5585	2.3759	14.8753	2.93333	5.88691	8.19413	0.708947	3.9578	10.7093	16.4531	1.01287	7.4178	4.98788	7.44145	15.078	0.760968	8.95191	9.02331	7.88008	11.064	0.674328	7.42104	2.8017	6.25714	2.17432	19.1783	6.37299	8.53708	9.0717
Lsamp	astrocyte_APNTS	1.50099	11.5328	1.70916	0.210891	8.30067	0.387153	10.2428	10.9305	8.44663	0.189806	0.56431	9.79553	10.3835	1.57684	9.40803	3.99457	11.421	9.21157	0.0755296	16.0867	5.51874	16.4204	0.266798	11.8753	31.5446	0.718478	0	0.121978	26.7008	9.66111	11.6614	9.21241	0.209456	1.9777	9.4419	11.9881	10.8777	8.82681	17.5794	9.31208	13.9683
Trpm3	astrocyte_APNTS	0.687723	3.6603	1.2638	0.0971698	2.09367	2.53082	2.90264	1.04579	0.971574	3.66799	3.3147	5.03643	2.78029	1.01021	4.22913	0.561275	1.89106	3.04287	0.816506	0.202984	0.664278	7.41405	2.77147	0.124279	30.3695	0.833304	0.114562	1.49863	33.4735	2.76475	9.70815	6.15568	0	27.879	1.1562	5.07615	0.739569	1.71641	18.4211	2.24058	7.76524
Mdga2	astrocyte_APNTS	2.39835	8.80634	3.18777	0.267632	10.6511	2.31001	9.62547	7.43418	7.72515	1.97265	2.71081	7.8279	7.62768	1.7716	8.17547	2.53703	10.9029	8.18961	1.68744	3.22785	7.53526	1.20996	1.66315	6.65316	0.237736	1.15283	0.505068	1.73178	7.36151	8.71349	0.338616	8.47479	0.223276	1.24888	9.74329	4.53151	9.76027	8.56736	5.69785	7.91433	9.31547
Grm8	astrocyte_Ca	0.37593	16.7146	0.489596	0.346586	6.85215	0.416127	12.2907	58.2616	17.3677	0.501208	0.4742	10.2713	12.3179	0.560766	5.72191	0.364058	13.5525	10.947	0.368691	0.499988	17.5089	0.750434	0.454672	0.513106	29.7043	0.298789	0.47943	0.498004	0.43286	13.7582	0	4.92918	4.45256	5.7781	7.349	4.98327	5.54923	10.2819	0.570325	8.72525	11.3962
Slc38a1	astrocyte_Ca	0.211128	2.36074	0.0520249	0.069956	2.10786	0.132169	2.59313	3.70364	3.27469	0.0796451	0.147689	2.49265	2.1583	0.23238	2.85635	0.206892	2.78366	1.9876	0.0526037	0.335896	2.85058	11.3034	0.153346	0.726214	1.24754	0	0.409803	0.0476049	1.13939	1.97456	0.696144	2.80753	0.0922827	0.972829	2.28768	2.10825	2.27984	3.98694	1.09513	2.05285	2.86891
Cacnb2	astrocyte_Ca	0.0394364	5.93427	0.0618226	0.213003	5.75161	0.0469709	6.01789	9.1883	5.93949	0.0818423	0.023758	4.62669	5.37001	0.0848901	6.15857	0.0408853	6.47627	5.19487	0.0807721	1.15879	6.70503	1.47828	0.110073	2.04443	8.55695	0.286978	0.135201	0.0339134	0.443875	4.99745	0.348624	4.84577	8.42023	3.81062	4.30017	7.47529	3.19594	5.95685	0.264711	4.73557	5.38866
St6galnac3	astrocyte_Ca	21.0186	2.54359	28.2604	0.179698	1.33806	24.1761	1.77718	2.91676	2.4777	28.183	28.231	1.18216	1.79941	20.274	1.21559	24.0514	2.55861	5.313	25.2284	4.51728	0.91343	5.29337	22.6557	2.47817	4.04814	14.3709	1.2968	23.9231	0.135693	1.61043	0.817439	1.6125	2.89939	2.24832	1.54027	1.05978	2.26522	0.941391	11.0999	2.1698	1.73868
Slc7a11	astrocyte_Ca	0.00727868	0.00711206	0.0127483	0	0.00777743	0.03101	0.0300373	0.012524	0.00978478	0.00445031	0.00517203	0	0.010799	0.0264697	0.00976253	0.0234076	0.0150647	0.0189584	0.134334	0	0.109708	10.6248	0.015037	0	32.383	0	0	0.0159961	4.06848	0	0	0.00920741	0	1.16277	0	0.00443242	0.0677407	0.00676003	2.67135	0	1.89295
Nkain2	astrocyte_myelin	35.463	17.7211	44.9584	0.211037	8.21614	37.536	12.8195	9.01474	10.242	38.621	45.689	9.31234	15.369	32.9051	13.3763	43.2008	13.601	19.751	31.486	19.9036	4.54376	0.820617	30.2782	0.252863	0.242302	19.5033	0.716604	29.7433	0.259319	10.3282	0.405144	20.4253	2.02867	10.7749	17.5114	8.11053	23.6774	11.5061	13.615	11.0806	10.618
Pde4b	astrocyte_myelin	18.4384	2.12275	24.6416	2.38609	1.10902	19.543	2.08088	2.01932	1.74345	20.2829	22.3506	1.2117	3.00579	18.4889	3.36404	21.6071	3.05621	5.03566	17.0596	8.11321	0.472073	4.04962	16.4493	5.93185	1.65186	12.7265	3.79756	16.6231	3.97424	2.47972	3.8967	3.02557	0.774044	0.972836	2.63647	4.24626	2.17433	3.46345	9.94992	2.56673	2.42498
Slc24a2	astrocyte_myelin	22.4629	4.06618	30.5169	0.282887	4.13832	29.2845	5.57181	19.8264	6.79565	38.171	34.5218	4.33537	2.94591	21.1046	6.35711	22.9763	7.55462	8.76457	42.9815	6.0861	13.9792	0.196037	32.0985	1.29714	0.539846	16.2923	0.938493	36.7028	0.187133	5.06305	0.581033	5.60268	1.86081	2.40748	5.77174	4.07142	5.07607	8.64317	15.5142	4.96905	3.83839
Tmeff2	astrocyte_myelin	68.9122	10.5294	85.715	0.446869	13.9248	67.4923	9.76462	4.80312	9.87179	65.6943	79.5772	7.59766	14.8895	61.4704	9.22104	80.9693	9.90585	18.2375	46.3851	18.7883	7.90202	1.20073	53.9631	11.115	1.08268	42.9741	1.89931	43.7791	0.36542	10.3266	4.0094	4.33703	4.20616	4.31323	26.3842	7.03142	18.0771	4.76915	24.7098	9.19458	6.48932
Bsg	endothelial	4.69485	2.97127	2.58625	2.79831	3.03861	4.29635	2.05903	2.84573	3.45305	3.13957	3.17597	3.03444	2.05008	5.2421	2.39083	2.62928	0.952301	2.43793	2.23172	2.36972	4.35044	1.71867	5.30533	3.48508	4.10036	2.965	1.90039	4.20887	1.6846	2.56986	3.91744	2.51736	3.8316	15.1979	1.90941	1.90366	1.26318	2.38924	1.65383	2.40169	2.81317
Rundc3b	endothelial	0.0477484	2.56054	0.0867378	0.148483	2.63204	0.0771865	2.97641	1.72336	2.57425	0.0487295	0.0369168	2.44568	2.70288	0.140776	2.54869	0.141218	2.75446	2.3539	0.0534592	0.684282	2.74037	0.293104	0.0893245	1.13182	0.0856971	0.227919	0	0.118803	0.101262	2.29255	1.63812	2.65368	0.0835757	2.25276	2.25447	2.29812	1.91931	2.85282	0.0326945	2.60076	1.28415
Gpcpd1	endothelial	0.442159	0.514177	0.381049	2.2703	0.814416	0.503548	0.840306	2.11304	0.747993	0.482959	0.43146	1.15573	0.85589	0.405587	0.920123	0.516007	1.111	0.761019	0.487853	2.1303	0.639186	0.907896	0.517801	1.9936	6.23711	1.45306	1.35224	0.277426	0.987999	1.19836	1.3878	1.31229	2.83618	7.27551	0.431516	0.46301	1.09284	0.957103	0.613276	1.12891	0.908598
Sgms1	endothelial	1.03392	2.61715	1.49312	5.17803	2.60081	1.60592	2.62072	1.92289	2.43919	3.12996	1.94254	2.27012	2.83096	0.923082	2.28802	0.835415	3.06398	2.46351	4.67198	1.9542	1.84897	1.75496	2.61301	3.49246	2.98726	3.58943	4.81939	3.56693	2.05019	3.33388	3.22802	2.5467	3.23078	6.39869	1.61589	2.2413	1.5101	2.22328	2.45351	2.92	2.22569
Spock2	endothelial	0.0116026	0.789788	0.0549351	0	0.708689	0.0192481	0.893706	0.955109	0.818534	0.0248755	0.0358369	0.720382	0.888809	0.0194044	0.966452	0.00623547	0.869238	0.753393	0.0189526	0.0964014	0.71904	0.135766	0.0772619	0.24823	0.834073	0	0	0	0.0901031	0.741365	0.603291	0.795819	0.0783957	1.27835	0.771853	0.647058	0.968625	0.889331	0.151788	0.558539	0.490985
Cfap54	ependymal	0.0281642	0.172337	0.0158379	0.00837924	0.171294	0.010267	0.126884	0.0993046	0.132172	0.0267845	0.032919	0.140028	0.407702	0.0106936	0.330169	0.0316751	0.123517	0.166422	0.0242899	0.0264114	0.119053	0.192021	0	0.0555838	0.344421	0	0	0.0491441	0.0740386	0.198877	0	0.126985	0	0.459474	0.108873	0.34964	0.101512	0.172275	0.10049	0.2914	0.174963
Cfap46	ependymal	0	0.0308746	0	0	0.00106823	0	0.00295159	0	0.00144933	0	0.00296096	0	0	0	0.0171633	0.00887995	0.0021454	0.0109619	0.00705436	0	0.0132692	0.154493	0	0	0	0	0	0	0.0602679	0	0	0	0	0.114719	0	0.108463	0.00446105	0	0.0555122	0	0.0336089
Dnah9	ependymal	0.041059	1.58372	0.0582624	0.0213525	0.936521	0.0826332	0.826326	0.915578	0.798513	0.0993352	0.0782189	0.704082	2.1885	0.0628586	1.27775	0.048833	1.13824	1.02551	0.0401649	0	0.327606	1.01267	0.081029	0.0597868	1.24495	0.120859	0	0.0491851	0.190682	0.854701	0	0.695913	0	0.888614	1.14877	1.3567	0.659808	0.804411	0.269042	0.631863	0.757933
Ikzf1	microglia	0	0	0	12.9303	0	0.0112663	0.0129645	0.00734524	0	0	0	0.00208084	0.00135992	0	0.011072	0	0.00540426	0.00426645	0	0	0.00713597	0	0	0.028493	0	5.3432	11.6679	0	0.0603389	1.77895	0	0.0220818	0.0783957	0	0	0.00772122	0.012704	0.0138188	0	0	0
Inpp5d	microglia	0	0.00506523	0.0117359	19.8438	0.0100187	0.00546045	0.0144578	0.0110179	0.00203762	0.0113031	0.0154284	0.0158895	0.00135992	0.00736994	0.0355079	0	0.014234	0.0085329	0.0161616	0	0	0.111827	0	0	0.221484	8.85209	9.45858	0	0.0611111	2.87421	0	0.0211397	0.10338	0.111671	0.00935893	0.0210922	0.0381121	0	0.0378753	0	0
Runx1	microglia	0.00515628	0.102634	0.0310118	8.32223	0.0555244	0.033123	0.0994513	0.0990396	0.153668	0.0264827	0.0389646	0.102612	0.146429	0.00912126	0.2163	0.0195261	0.30297	0.1248	0.03948	0.0421756	0.0644324	0.133169	0	0.180279	0	4.148	7.26432	0.0614132	0.159072	1.59944	0	0.144381	0.357329	0.332976	0.746791	0.056433	0.38711	0.263644	0.0473391	0.140763	0.16103
Fgd2	microglia	0.0159687	0.00447184	0.0111227	3.11185	0.00274988	0.0223105	0.0046734	0.00722895	0.00150009	0.0117005	0.0229468	0.00256115	0	0.00932265	0.00639227	0	0.00243126	0	0	0	0.00433544	0	0	0.00695495	0	1.63623	2.76373	0	0.0168392	0.499559	0	0.0132356	0	0.0981634	0	0	0	0	0	0	0
Dock8	microglia	0.0448974	0.0235959	0.0468366	17.9592	0.101664	0.0185067	0.00719845	0.0206582	0.0163329	0.0221297	0.0461116	0.0712126	0.103395	0.024385	0.0329375	0.0222879	0.0216225	0.0493912	0.0137862	0.130096	0.0713195	0.0499151	0.0250521	0.0437892	0.24237	8.30167	14.7271	0.052655	0.133655	3.24764	0	0.0368126	0.0783957	0.104808	0.0754725	0.0239147	0.0621455	0.00658596	0.0867973	0.0452359	0.0309703
Vcan	OPC	0.536266	0.28316	0.571866	0.0615645	0.714156	0.400288	0.269332	0.160901	0.863158	0.422655	0.619779	0.173261	0.157876	0.305837	0.349004	0.552169	0.21851	0.370932	0.217919	25.3461	0.737899	3.16762	0.448199	23.8997	0.349125	0.473068	0.0713582	0.270099	0.6334	0.35382	0	0.525029	0.101451	0.678121	0.313651	0.185838	0.0158474	0.249117	0.482593	5.28818	0.242273
Itga9	OPC	0.017874	0.080013	0.0269793	6.52363	0.0290836	0.0173552	0.100827	0.0170712	0.108505	0.00895656	0	0.0789908	0.258849	0.0112159	0.168817	0.0629591	0.103879	0.10228	0.00741794	3.87324	0.0281772	0.0822314	0	13.943	0.110742	2.36208	2.60422	0	0.266619	0.75721	0	0.0530321	0.109917	0.333948	0.74755	0.304664	1.0385	0.00288504	0.0569424	3.1087	0.0707773
Xylt1	OPC	0.0771181	0.619582	0.0200431	0.83232	0.32208	0.0995033	0.418606	0.727541	0.498628	0.138589	0.0954172	0.085336	0.341153	0.0706708	0.537822	0.050878	0.553192	0.445276	0.138727	5.74345	0.786905	0.150723	0.0845783	9.06422	0.59297	0.0983771	0.701112	0.154073	1.34821	0.391453	0	0.106714	0	0.722037	0.84672	0.483672	0.107432	0.622269	0.870918	1.8804	1.21277
Tnr	OPC	0.0518165	2.37836	0.0293313	0.0807382	3.42225	0.0466734	2.50167	3.4394	2.5794	0.0765188	0.048741	2.12974	1.97478	0.11399	2.24583	0.370515	3.40935	2.06751	0.0714493	47.7341	4.0033	8.17208	0.0200316	26.8538	0	0.235347	0	0.0134895	0.245643	2.87746	1.46406	1.71953	0.0384858	0.568057	2.72912	2.33696	6.01697	1.42391	0.0567361	9.19683	2.39818
Dlc1	pericyte	0.145033	2.61287	0.203286	0.595694	1.06459	0.427958	3.63787	3.79659	4.00528	2.37664	0.603572	2.27999	3.27924	0.140161	3.53526	0.0500038	5.34042	3.33697	6.48662	0.507057	2.38807	2.31266	1.08699	0.293619	1.19483	0.734972	0.0752553	4.12928	0.627643	2.72094	0.998575	3.64078	29.0319	2.32817	5.62115	1.71855	2.47288	5.6511	1.60256	2.3556	2.62262
Notch3	pericyte	0	0	0	0	0.0143398	0	0.0124829	0.0146291	0.0156405	0	0.00276426	0.00817895	0.00842814	0	0.0245089	0	0.00331434	0.00199547	0	0	0.00531809	0.14621	0	0	0.042147	0	0	0	0.597562	0.0177862	0	0	7.377	0.0279651	0	0	0.0119086	0.00676003	0.314173	0.00838625	0.0493462
Pde8b	pericyte	0.0341741	3.20645	0.0355047	0.0927963	2.65778	0.0795061	3.48353	0.824636	2.62419	0.0129239	0.0480925	1.89978	3.75628	0.0758481	1.92023	0.0284512	3.31868	2.50576	0.0268649	1.23072	3.36516	0.980099	0	2.91507	0.463478	0.0472791	0	0.0255032	3.07665	2.9145	0.109541	2.1145	38.3043	1.02215	1.60571	2.30502	4.67634	0.341742	2.44174	3.56564	3.1456
Atp13a5	pericyte	0.00490454	0.0143304	0.0536534	0.0112706	0.0690102	0.00884173	0.025278	0.0103094	0.0817666	0.00466349	0.00430954	0.00840568	0.0572014	0.0126831	0.00847535	0.0104568	0.0157066	0.0169185	0.0160016	0	0.0383939	0	0	0.00791776	0	0	0	0	0.0367803	0.0232532	0	0	66.5444	0.307617	0.0266816	0.00907961	0.011748	0.0067644	0	0	0.0102732
Trpc3	pericyte	0.0261398	0.766441	0.029588	0.0433529	0.519015	0.0373639	0.656966	0.56859	1.18869	0.0233768	0.0274646	0.178342	0.239865	0.0500246	0.580681	0.0160212	0.538515	0.522065	0.0382867	0.132572	1.89574	0.124235	0	0.102556	0.0614571	0.0339916	0	0	0.260291	0.557773	0	0.186157	12.5157	0.175073	0.396209	1.02562	0.332123	0.188008	0.0477855	0.364696	0.676846
Acta2	smooth_muscle	0	0.00412647	0	0	0	0	0	0	0.00320715	0	0	0	0	0	0	0	0	0.00167	0	0	0	0	0	0	0	0	0	0	0.00497759	0	0	0	0.533894	0	0	0	0	0	0	0	0.0336089
Tpt1	smooth_muscle	1.7143	0.810295	0.953278	1.87832	0.867519	1.38457	0.552152	0.685193	0.796957	0.948097	0.87822	0.688451	0.530354	1.689	0.673471	1.12152	0.28679	0.730127	0.722141	0.54363	0.963627	0.861291	1.24935	0.900854	1.31739	1.20493	2.54545	1.17733	0.605938	0.488719	1.099	0.594441	1.83298	2.54343	0.688894	0.691017	0.493922	0.693299	0.733109	0.549182	0.462914
Gmnc	tanycyte	0	0.00206553	0	0	0.00884838	0	0	0	0	0	0	0.00500438	0.0017409	0	0	0	0	0	0	0	0	0	0	0	0	0	0	0	0	0	0	0	0	0	0	0	0	0	0	0	0
Rbm47	tanycyte	0	0	0	0.362861	0.00124476	0	0	0.010886	0	0	0	0.00156783	0	0	0.00223394	0	0.00430043	0	0	0	0	0	0	0.01704	0.109804	0.0682625	0.143303	0	0.00247892	0.0287936	0	0	0	0.295144	0.00739027	0	0	0	0	0	0
Col9a3	tanycyte	0.186325	0.0170842	0.187746	0	0.0117378	0.239505	0.0235988	0	0.0110726	0.321827	0.300078	0.0160328	0.0157204	0.152538	0.0255573	0.314449	0.000837096	0.0502301	0.427646	0.167782	0	0	0.302479	0.174283	0.0676567	0.0258088	0	0.24145	0.078141	0	0	0.0127149	0	0.156541	0	0.0185115	0	0	0.0356401	0	0.0485696
Tmem72	tanycyte	0.00418938	0.00654266	0	0	0.0258651	0.0114921	0.0181079	0.47313	0.0521948	0	0.0152112	0.0199089	0.0193726	0	0.0288542	0	0.0065197	0.00936134	0	0	0.0800587	0	0	0.00809119	0	0	0	0	0	0.0273648	0	0.104106	0	1.58216	0.018275	0.0088304	0.0135785	0.00651805	0	0.0349978	0.0235322
Pex5l	oligodendrocyte_intermediate	73.131	3.87863	87.3185	0.27519	3.57021	69.2613	4.02026	8.57098	6.25462	49.0629	84.4694	14.3413	8.10487	69.2309	15.3255	79.8587	8.1435	16.1035	21.6618	14.2111	7.20292	7.46376	48.0645	0.516653	0.633296	41.2524	0.966694	23.1534	6.27201	5.71418	0.150083	15.6161	3.92756	4.57424	3.78679	1.46074	19.4758	21.4496	25.9688	6.07148	5.01659
Ano4	oligodendrocyte_intermediate	30.5716	2.8792	36.546	0.197925	1.49516	29.1468	4.19542	4.38373	4.06359	23.8117	33.7358	3.7275	4.44608	27.8078	4.46425	36.9537	6.92759	7.62051	12.9677	7.75332	2.48237	0.618943	21.2034	5.31465	4.93806	16.4486	1.06094	16.3589	0.135854	2.58088	0	4.96389	7.89067	1.80602	0.888864	1.65056	7.01117	6.40664	9.07177	3.85233	3.29725
Grm7	oligodendrocyte_intermediate	0.300746	14.9729	0.335123	0.11697	18.3466	0.104834	14.7171	6.50042	11.8145	0.147867	0.185192	10.2244	18.0668	0.308694	11.4161	1.00499	12.9489	13.0254	0.114618	4.00737	3.68408	2.85589	0.156692	11.0747	1.62776	0.309487	0	0.220283	0.159611	15.2348	0.112158	10.6268	13.5476	2.05513	7.59984	9.47258	9.0035	7.04111	0.336591	13.0697	10.7272
Mob3b	oligodendrocyte_myelinating	0.175257	0.499876	0.280145	1.05153	0.549117	0.403717	0.598892	1.39641	0.699712	2.85563	0.787988	1.12536	0.45406	0.305342	0.371034	0.850256	0.945422	0.710722	6.21436	1.21352	0.456806	2.73689	1.61507	0.395059	11.2093	1.81631	0.284897	4.79019	0.723611	1.03823	0	0.809182	1.47199	1.57542	0.464822	0.802602	1.97949	0.39555	1.6785	0.413862	0.467909
Ctnna2	oligodendrocyte_myelinating	0.143474	0.744491	0.179603	0	1.20645	0.176572	0.812616	0.581755	0.638161	0.203438	0.18091	0.885966	0.967735	0.12727	0.735314	0.152707	0.68782	0.650212	0.738291	0.836038	0.536011	0.597797	0.197576	0.981654	0	0.0678664	0.229124	0.294938	0.0922928	0.75768	0.585735	0.518604	0.10707	0.205719	1.01165	0.976404	0.717802	0.595809	0.445788	0.839837	0.802574
Adgrb3	oligodendrocyte_myelinating	5.97524	30.0863	8.52697	0.527057	31.1862	7.51817	38.4401	20.2226	29.824	10.5587	8.73734	16.6276	36.4866	5.60603	27.1398	6.04521	41.3981	32.749	11.8119	21.2665	23.0303	35.3038	8.34736	39.2955	4.7164	4.98738	0.98576	9.58371	59.3201	29.2505	33.5219	40.974	0.939543	7.40369	20.3355	39.1968	35.3619	4.84359	35.798	36.334	36.4546
Aff3	oligodendrocyte_myelinating	0.0521945	7.94258	0.0835716	0.0550442	7.42308	0.0565978	8.68162	9.19109	9.53461	0.102759	0.0286645	9.9098	8.0043	0.086889	7.5561	0.0660729	9.4756	7.79166	5.26063	1.05207	13.4423	8.21204	0.0953249	1.62656	15.3514	0.133291	3.20452	0.813882	6.63097	7.68788	6.36764	9.76382	2.60828	4.337	8.26591	7.53826	7.94187	9.21902	6.486	7.64617	9.53541
Cntn3	oligodendrocyte_myelinating	0.0257957	1.85821	0.0280205	0.0400014	0.749787	0.0634349	2.56293	4.42205	2.00516	0.0534546	0.0428917	2.98333	2.36571	0.0451334	4.35228	0.0287061	2.74122	2.24609	0.0498458	0.138976	0.367036	1.45908	0.0820142	0.919513	9.9464	0.0366388	0.0851615	0.0621404	0.203218	2.49107	0	3.23998	0	1.38358	1.63107	1.55677	2.17795	1.77964	0.233514	2.66409	2.43605
Csmd1	oligodendrocyte_premyelinating	0.552476	2.69397	0.927115	0.0588254	2.27397	0.624374	3.01313	0.526368	2.28906	0.644066	0.659688	2.55784	3.72413	0.636587	2.43078	0.740263	3.15893	2.75849	0.272612	2.12375	3.74093	0.641464	0.642421	3.91786	0	0.349612	0.329456	0.309383	0.202083	2.4882	0.47149	2.54542	0	0.423685	2.6198	2.00183	1.95186	0.940683	0.209668	3.15135	2.26038
Opcml	oligodendrocyte_premyelinating	2.38658	10.3784	2.7959	0.194928	7.31853	2.20237	13.6364	13.6997	15.2856	1.32513	2.19258	18.8976	12.8442	2.39445	22.1042	3.11796	15.6021	12.8141	0.686341	61.7872	18.7467	0	0.993775	29.7136	3.01067	1.19598	0.303056	0.57552	0.555171	10.7031	26.5537	20.0547	0.312977	3.92922	2.02682	7.75414	2.20972	11.0129	1.17566	20.0087	8.88792
Fyn	oligodendrocyte_premyelinating	1.41497	3.55485	1.45017	0.327713	4.25115	1.15435	4.06691	2.18033	3.08339	0.984324	1.19763	4.09031	4.16679	1.37898	3.88401	2.24436	3.75178	3.81643	0.985528	41.1575	3.40367	4.2838	1.23583	7.25572	2.493	0.846105	1.63946	0.882722	5.62791	3.54126	1.97675	3.70019	2.77654	1.76571	4.17862	2.93874	4.57127	3.18658	3.61116	4.73565	3.63293
Epb41l2	oligodendrocyte_premyelinating	0.611207	0.246063	0.670312	7.13592	0.996543	0.844548	0.328272	0.199943	0.171615	1.04537	0.978068	0.64616	0.367764	0.558684	0.314444	0.621836	0.353595	0.415458	1.15706	8.13652	0.413795	0.594135	0.873487	0.83103	0.52919	3.63945	2.07324	0.680271	0.993748	1.22224	0	0.341887	1.69706	0.723257	0.180919	0.146168	0.191864	0.53914	1.16069	0.458545	0.381282
Slc6a13	p_fibroblast	0.00880317	0.0017137	0	0	0.00355525	0.00632131	0	0	0.00726934	0	0	0	0.00109305	0	0	0	0.000510323	0.00419275	0.0232423	0	0	0	0	0.0071861	0	0	0	0	0.00791579	0	0	0.00714825	10.7638	1.97565	0	0	0	0	0	0	0
Bmp6	p_fibroblast	0.0528971	1.22942	0.0464091	0	1.0455	0.0551286	1.49587	1.93806	1.29327	0.0756915	0.0941571	1.27548	1.0365	0.055762	1.25891	0.081589	1.52114	1.10826	0.280657	0	1.5019	1.01938	0.168742	0.0166536	2.27648	0.026191	0.0752553	0.205876	0.0806071	1.40767	0.602491	0.978513	0.0416339	2.90522	1.91182	1.22961	1.25686	3.54033	0.15671	0.872145	0.749607
Stk39	s_fibroblast	4.25333	2.67289	5.53966	0.195468	2.74729	4.28231	3.52581	4.94708	3.39527	5.27206	5.18534	3.35598	2.95765	4.05684	3.27659	5.17024	4.51892	3.64641	3.60562	2.08346	2.47136	0.991568	3.60544	1.58918	7.99291	2.21733	0.849698	3.28775	0.66282	3.03191	2.96409	3.63479	7.63217	5.54072	3.66215	1.9905	4.65888	3.713	1.57718	2.85528	2.39005
Erc2	s_fibroblast	0.144189	3.62486	0.239564	0.0887612	2.97695	0.264427	4.6331	5.01098	4.56293	0.252226	0.17254	4.2325	3.79554	0.225991	4.64802	0.167046	4.99637	3.70889	1.0047	0.486801	3.78177	0.258243	0.170657	1.09964	0.130822	0.236514	0	0.319413	0.187311	3.6321	1.06916	4.75108	0	1.56726	8.6514	5.21363	1.64022	3.27848	0.373892	3.47416	3.04386
Rgs7bp	s_fibroblast	0	0.477501	0	0.0112706	0.580769	0	0.72743	0.867851	0.986118	0.00580088	0.0110326	0.972664	0.684288	0.0298488	0.822912	0	0.802609	0.709717	0.00913776	0.242318	0.977876	0	0	0.367798	0.671029	0	0	0	0.157198	0.469581	0.712826	1.1617	0	0.214507	0.594811	0.915263	1.9398	1.33965	0.0397459	0.519627	0.644921
Cdh11	s_fibroblast	1.53619	1.39482	1.32446	0.108125	1.40258	1.37025	2.22651	1.07229	2.32916	1.5078	1.60231	1.20084	1.97741	1.37098	2.39439	1.97574	2.29905	2.01412	2.86711	2.99233	1.36505	3.93355	1.17846	3.66573	4.1815	0.940921	0.360269	1.82625	4.30422	1.89702	0	2.42224	1.38391	3.4198	2.81886	0.610345	0.485029	2.11709	3.36957	2.51131	2.64147
Adam12	s_fibroblast	1.13858	0.333123	1.52858	0	0.41567	0.864072	0.527423	0.0795634	0.198205	0.532187	1.33408	0.0871795	0.132709	1.11712	0.909594	1.45145	0.195248	0.40789	0.326527	1.90531	0.345166	0	0.553871	3.63401	3.79629	0.562646	0	0.401182	0.468054	0.116227	0.117	0.0724896	0.148704	1.18541	2.90353	0.253296	0.430405	0.0751694	0.577805	1.48968	0.289019
