# Supplementary material for: A unified rodent atlas reveals the cellular complexity and evolutionary divergence of the dorsal vagal complex
Source: eLife. 2025 Oct 7;14:RP106217. doi: 10.7554/eLife.106217 (PMC12503491; doi:10.7554/eLife.106217)
Supplement: Supplementary file 8. — Number of cells per treatment per identity layer-2. [file elife-106217-supp8.xlsx]

## Sheet: S8
treatment	identity_layer2	n_cells
ad_libitum_fed	astrocyte	2187
ad_libitum_fed	corelautus_class	247
ad_libitum_fed	endothelial	193
ad_libitum_fed	ependymal	223
ad_libitum_fed	fibroblast	128
ad_libitum_fed	Golli_class	109
ad_libitum_fed	Lhx2_class	772
ad_libitum_fed	Lrmda_class	942
ad_libitum_fed	magnaclass1	3176
ad_libitum_fed	magnaclass2	2789
ad_libitum_fed	microglia	103
ad_libitum_fed	monoamine_class	1008
ad_libitum_fed	mural	51
ad_libitum_fed	oligodendrocyte	1864
ad_libitum_fed	pH_class	57
ad_libitum_fed	preganglionic_class	53
ad_libitum_fed	progenitor	233
ad_libitum_fed	Sall3_class	732
fasted	astrocyte	1279
fasted	corelautus_class	176
fasted	endothelial	38
fasted	ependymal	65
fasted	fibroblast	156
fasted	Golli_class	127
fasted	Lhx2_class	532
fasted	Lrmda_class	875
fasted	magnaclass1	2756
fasted	magnaclass2	2789
fasted	microglia	1188
fasted	monoamine_class	657
fasted	mural	89
fasted	oligodendrocyte	9450
fasted	pH_class	6
fasted	preganglionic_class	67
fasted	progenitor	514
fasted	Sall3_class	844
licl_injected	astrocyte	2416
licl_injected	corelautus_class	341
licl_injected	endothelial	59
licl_injected	ependymal	234
licl_injected	fibroblast	118
licl_injected	Golli_class	90
licl_injected	Lhx2_class	411
licl_injected	Lrmda_class	630
licl_injected	magnaclass1	1899
licl_injected	magnaclass2	1762
licl_injected	microglia	434
licl_injected	monoamine_class	625
licl_injected	mural	117
licl_injected	oligodendrocyte	6431
licl_injected	pH_class	23
licl_injected	preganglionic_class	126
licl_injected	progenitor	308
licl_injected	Sall3_class	442
refed	astrocyte	3732
refed	corelautus_class	369
refed	endothelial	199
refed	ependymal	303
refed	fibroblast	273
refed	Golli_class	146
refed	Lhx2_class	903
refed	Lrmda_class	1374
refed	magnaclass1	4586
refed	magnaclass2	4423
refed	microglia	1051
refed	monoamine_class	1327
refed	mural	266
refed	oligodendrocyte	12303
refed	pH_class	55
refed	preganglionic_class	126
refed	progenitor	630
refed	Sall3_class	1087
vehicle_injected	astrocyte	2079
vehicle_injected	corelautus_class	74
vehicle_injected	endothelial	152
vehicle_injected	ependymal	315
vehicle_injected	fibroblast	128
vehicle_injected	Golli_class	25
vehicle_injected	Lhx2_class	568
vehicle_injected	Lrmda_class	931
vehicle_injected	magnaclass1	3015
vehicle_injected	magnaclass2	2484
vehicle_injected	microglia	11
vehicle_injected	monoamine_class	963
vehicle_injected	mural	23
vehicle_injected	oligodendrocyte	2081
vehicle_injected	pH_class	20
vehicle_injected	preganglionic_class	55
vehicle_injected	progenitor	185
vehicle_injected	Sall3_class	537
