# Supplementary material for: A unified rodent atlas reveals the cellular complexity and evolutionary divergence of the dorsal vagal complex
Source: eLife. 2025 Oct 7;14:RP106217. doi: 10.7554/eLife.106217 (PMC12503491; doi:10.7554/eLife.106217)
Supplement: Supplementary file 9. — Differential expression analysis (MAST algorithm) (Finak et al., 2015) results for genes coding for metabolism-related receptors between meal-related treatments (i.e. refed versus ad libitum fed, and refed versus overnight fasted) and per neuronal magnaclass. If a receptor is missing for any given comparison for any of the magnaclasses, the log fold-change of that gene between both treatments in that neuronal class was <0.1; therefore, it is not reported (see Methods). [file elife-106217-supp9.xlsx]

## Sheet: S9
gene	p_val	avg_log2FC	p_val_adj	class	treatments	upregulated_refed
Lepr	8.27693e-40	-0.33339	2.67221e-35	magnaclass2	refed_adlib	adlib
Cckbr	3.08633e-32	0.319137	9.96421e-28	magnaclass2	refed_adlib	refed
Lepr	2.45494e-18	-0.303642	7.92578e-14	magnaclass1	refed_adlib	adlib
Cckbr	1.84607e-17	-0.296254	5.96005e-13	magnaclass1	refed_adlib	adlib
Lepr	1.00858e-12	-0.365213	3.25619e-08	magnaclass1	refed_fasted	fasted
Glp1r	1.33515e-08	0.101573	0.000431053	magnaclass2	refed_adlib	refed
Cckbr	1.47143e-08	0.339171	0.00047505	magnaclass1	refed_fasted	refed
Cckbr	6.03526e-07	0.55653	0.0194848	magnaclass2	refed_fasted	refed
Glp1r	9.81539e-07	-0.675049	0.031689	magnaclass1	refed_adlib	adlib
Mc4r	1.4198e-05	0.506918	0.458383	magnaclass1	refed_adlib	refed
Leprot	2.31823e-05	-0.271525	0.748441	magnaclass2	refed_fasted	fasted
Mc4r	2.34435e-05	1.28958	0.756874	magnaclass2	refed_fasted	refed
Gfral	2.75306e-05	-0.862958	0.888826	magnaclass2	refed_adlib	adlib
Glp1r	0.0050835	-0.239387	1	magnaclass1	refed_fasted	fasted
Gfral	0.0344917	0.719325	1	magnaclass1	refed_fasted	refed
Calcr	0.446284	0.473523	1	magnaclass1	refed_fasted	refed
Ramp3	0.28191	-0.200348	1	magnaclass1	refed_fasted	fasted
Gipr	0.00786793	0.354512	1	magnaclass1	refed_fasted	refed
Cckar	0.236153	-0.601306	1	magnaclass1	refed_fasted	fasted
Mc4r	0.400677	0.449967	1	magnaclass1	refed_fasted	refed
Calcr	0.0645759	-0.457271	1	magnaclass1	refed_adlib	adlib
Ramp3	0.0998206	-1.06981	1	magnaclass1	refed_adlib	adlib
Gipr	0.000248834	-0.233939	1	magnaclass1	refed_adlib	adlib
Cckar	0.340578	-1.7585	1	magnaclass1	refed_adlib	adlib
Calcr	0.134835	-0.381212	1	magnaclass2	refed_adlib	adlib
Ramp3	0.000108884	-0.312557	1	magnaclass2	refed_adlib	adlib
Gipr	0.000134219	-1.31214	1	magnaclass2	refed_adlib	adlib
Mc4r	3.4191e-05	0.104917	1	magnaclass2	refed_adlib	refed
Gfral	0.0620612	0.784095	1	magnaclass2	refed_fasted	refed
Calcr	0.604472	0.384827	1	magnaclass2	refed_fasted	refed
Ramp3	0.0129777	-0.851276	1	magnaclass2	refed_fasted	fasted
Gipr	0.00719663	-0.736621	1	magnaclass2	refed_fasted	fasted
Cckar	0.0142911	0.606093	1	magnaclass2	refed_fasted	refed
Prlr	0.000515891	0.257824	1	magnaclass2	refed_fasted	refed
