# Supplementary material for: A unified rodent atlas reveals the cellular complexity and evolutionary divergence of the dorsal vagal complex
Source: eLife. 2025 Oct 7;14:RP106217. doi: 10.7554/eLife.106217 (PMC12503491; doi:10.7554/eLife.106217)
Supplement: Supplementary file 10. — Compilation of statistics and cells processed for the initial high-quality cell filtering per sample. [file elife-106217-supp10.xlsx]

## Sheet: S10
species	treatment	sample	subsample	initial_cells	min_nFeature	max_nFeature	med_nFeature	percentile1_nFeat	percentile2_nFeat	percentile5_nFeat	percentile10_nFeat	min_nCount	max_nCount	med_nCount	percentile1_nCou	percentile2_nCou	percentile5_nCou	percentile10_nCou	ratio_nCount_nFeat_min	ratio_nCount_nFeat_max	ratio_nCount_nFeat_p1	ratio_nCount_nFeat_p2	ratio_nCount_nFeat_p5	ratio_nCount_nFeat_p10	filtered_cells_1
mouse	licl_injected	licl	licl_1	8127	340	10779	1705	458	523	727	874	501	84479	3187	563	662	1020	1307	1.078	7.86203	1.19	1.25	1.37	1.47	7935
mouse	licl_injected	licl	licl_2	10054	311	12909	1914	439	468	636	927	500	168245	3787	536	579	858	1384	1.10403	13.0332	1.18	1.2	1.33	1.48	9645
mouse	veh_injected	veh	veh_1	8601	327	12021	2359	461	520	737	921	500	132277	4492	560	648	1015	1360	1.11232	11.0038	1.19	1.23	1.35	1.45	8390
mouse	veh_injected	veh	veh_2	6623	369	8977	3157	470	557	897	1205	500	68408	6634	560	695	1306	1889	1.10063	7.62036	1.18	1.21	1.42	1.55	6462
mouse	refed	refed	refeed_1	7241	319	12318	1613	450	492	712	884	500	140786	2967	551	637	986	1303	1.11283	11.4293	1.19	1.24	1.36	1.46	7044
mouse	refed	refed	refeed_2	8674	377	10843	2466	481	556	720	911	502	92510	4757	591	724	993	1333	1.11947	8.53177	1.21	1.26	1.36	1.46	8505
mouse	ad_libitum_fed	adlib	adlib_1	7717	337	14001	2895	462	506	799	1091	501	269658	5994	559	625	1128	1662	1.115	19.2599	1.19	1.22	1.38	1.51	7511
mouse	ad_libitum_fed	adlib	adlib_2	8594	360	8999	1985	460	506	622	761	501	49989	3470	574	656	831	1069	1.11297	5.55495	1.23	1.26	1.32	1.39	8399
mouse	fasted	fast	fast_1	12474	384	10728	2357	549	747	1013	1194	502	116293	5042	690	1042	1495	1889	1.11523	10.8401	1.23	1.32	1.45	1.56	12335
mouse	fasted	fast	fast_2	11476	378	13141	2484	439	492	894	1204	500	221286	5498	537	608	1290	1927	1.14155	16.8394	1.2	1.23	1.4	1.57	11170
mouse	refed2	refed2	refed_1	11047	356	10748	2385	451	520	914	1183	500	102761	5323	556	661	1368	1934	1.13478	10.2956	1.21	1.26	1.45	1.61	10801
mouse	refed2	refed2	refed_2	9539	343	11642	2268	510	708	1011	1195	500	169619	5124	638	1008	1565	1987	1.15165	14.5696	1.24	1.37	1.51	1.64	9427
rat	ad_libitum_fed	ratadlib	ratadlib	13360	285	9510	2068	678	791	940	1072	501	82503	3675	864	1050	1283	1534	1.09343	9.73384	1.25	1.29	1.35	1.42	13141
Dowsett	ad_libitum_fed	Dow_adlib	adlib_1	3524	368	9082	2642	702	848	1016	1151	525	52380	5642	1070	1308	1733	2106	1.25	5.76745	1.4	1.48	1.65	1.78	3510
Dowsett	ad_libitum_fed	Dow_adlib	adlib_2	4565	365	7495	2408	648	774	920	1033	503	39893	5069	957	1182	1547	1839	1.21443	5.49188	1.38	1.45	1.63	1.73	4548
Dowsett	fasted	Dow_fast	fast_1	4100	321	7477	2390	605	774	926	1048	507	38182	4846	896	1144	1459	1808	1.18721	5.39968	1.35	1.39	1.55	1.68	4080
Dowsett	fasted	Dow_fast	fast_2	4723	377	8183	2323	634	796	919	1020	500	44851	4714	932	1181	1495	1743	1.21765	5.68132	1.36	1.41	1.58	1.68	4701
