# Supplementary material for: A unified rodent atlas reveals the cellular complexity and evolutionary divergence of the dorsal vagal complex
Source: eLife. 2025 Oct 7;14:RP106217. doi: 10.7554/eLife.106217 (PMC12503491; doi:10.7554/eLife.106217)
Supplement: Supplementary file 11. — Compilation of low-quality cluster analysis statistics to filter high-quality clusters per sample. [file elife-106217-supp11.xlsx]

## Sheet: S11
species	treatment	sample	cluster	cells	mean_genes	median_genes	range_genes	mean_counts	median_counts	range_counts	shapiro_wilk_counts	removed
mouse	licl_injected	licl	10	430	1075.63	903.5	500-3939	1870.65	1364	614-12522	4.58806e-26	no
mouse	licl_injected	licl	13	370	1170.24	1121	572-2760	1678.63	1572	703-5562	1.32665e-13	no
mouse	licl_injected	licl	24	101	1098.3	1033	525-3461	1785.33	1622	676-9302	1.91115e-14	no
mouse	licl_injected	licl	6	996	1063.58	1065	503-1934	1724.92	1709	654-3772	1.09322e-05	no
mouse	licl_injected	licl	1	2276	1173.44	1085.5	515-4490	2127.88	1791.5	648-16598	2.00125e-57	no
mouse	licl_injected	licl	23	104	1606.02	1356.5	511-4624	2866.83	2058.5	715-12655	7.43598e-10	no
mouse	licl_injected	licl	22	118	1418.48	1348.5	552-2840	2342.29	2194.5	740-5592	1.51092e-05	no
mouse	licl_injected	licl	2	1912	1550.17	1485.5	844-3844	3087.05	2837	1406-12659	3.93056e-42	no
mouse	licl_injected	licl	18	184	1870.74	1734	560-5255	3358.41	2893.5	713-13879	5.83824e-15	no
mouse	licl_injected	licl	0	2292	1711.15	1678	505-4139	3288.81	3027	661-14129	1.31935e-32	no
mouse	licl_injected	licl	3	1359	1708.55	1640	506-4681	3441.82	3104	651-19220	6.42086e-32	no
mouse	licl_injected	licl	21	125	1819.58	1756	545-3795	3479.9	3161	758-10399	4.83549e-07	no
mouse	licl_injected	licl	15	320	2112.85	1862	599-7898	4535.02	3447	885-52092	8.91465e-29	no
mouse	licl_injected	licl	28	56	2496.88	2383	1352-4471	4771.52	4268.5	1917-11647	9.67126e-05	no
mouse	licl_injected	licl	26	71	2399.55	2364	844-4426	5619.34	4994	1535-13080	0.000173214	no
mouse	licl_injected	licl	19	154	2597.87	2558	897-4340	5651.24	5164.5	1246-14691	8.36781e-07	no
mouse	licl_injected	licl	8	692	3329.15	3243.5	870-7051	8229.19	7357	1282-33692	6.74452e-20	no
mouse	licl_injected	licl	16	222	3241.76	3139	898-7857	8915.42	7388.5	1192-43012	8.60261e-16	no
mouse	licl_injected	licl	7	934	3783.56	3679	760-8894	10217.3	8679.5	1026-55475	6.94774e-29	no
mouse	licl_injected	licl	12	426	3980.21	3755.5	1092-8145	11943.2	9557.5	1639-51096	3.80712e-21	no
mouse	licl_injected	licl	5	1325	3931.15	3836	837-9283	11160.4	9820	1235-60643	1.00651e-31	no
mouse	licl_injected	licl	11	429	4027.13	3907	1102-9598	11789.8	10135	1635-72640	9.22926e-24	no
mouse	licl_injected	licl	25	74	4481.38	4387	1507-11339	14210.3	10675	2189-93840	8.66248e-11	no
mouse	licl_injected	licl	9	512	4745.14	4451	1738-11055	15504.7	11960	2753-96916	2.24234e-28	no
mouse	licl_injected	licl	14	360	4581.71	4472	1280-8792	15020	12945	1894-69123	6.869e-18	no
mouse	licl_injected	licl	4	1334	4823.58	4734	1159-9887	15804.5	13583.5	2164-81102	1.19733e-31	no
mouse	licl_injected	licl	17	202	5415.28	5064.5	1861-12909	19534.8	14860	2784-168245	9.47857e-20	no
mouse	licl_injected	licl	20	144	5715.28	5609	878-9445	22880.5	19054	1250-64541	1.19683e-07	no
mouse	licl_injected	licl	27	58	6316.66	6432.5	1483-10779	29885	24297	2491-119009	1.08467e-05	no
mouse	veh_injected	veh	16	262	1044.77	926.5	505-4317	1597.97	1369	631-9719	1.08437e-19	yes
mouse	veh_injected	veh	27	107	1185.44	1060	649-3536	1750.3	1444	804-9451	2.06226e-15	yes
mouse	veh_injected	veh	3	1164	1127.61	1069.5	502-4242	1961.86	1733.5	635-15399	7.91202e-42	no
mouse	veh_injected	veh	20	182	1483.62	1185.5	507-4936	2566.19	1748	674-13689	3.46595e-17	no
mouse	veh_injected	veh	24	129	1311.85	1206	510-3945	2133.43	1790	680-8482	3.70003e-13	no
mouse	veh_injected	veh	26	110	1473.84	1392.5	567-4663	2383.7	2108.5	755-11255	1.42327e-14	no
mouse	veh_injected	veh	1	1863	1521.95	1477	513-3085	2739.57	2520	642-8530	6.07054e-27	no
mouse	veh_injected	veh	4	860	1515.93	1431.5	530-3419	2835.42	2541.5	679-9273	4.43909e-24	no
mouse	veh_injected	veh	18	221	1612.97	1575	534-5569	2872.1	2575	735-18237	2.09111e-19	no
mouse	veh_injected	veh	17	228	2339.51	2070	547-7528	4669.23	3511.5	749-35263	5.84307e-23	no
mouse	veh_injected	veh	14	273	2102.93	1901	795-5812	4423.6	3565	1177-19647	6.77786e-20	no
mouse	veh_injected	veh	29	43	2415.42	2207	1088-6929	5030.72	3900	1445-26741	4.53755e-10	no
mouse	veh_injected	veh	15	272	2790.47	2756.5	601-4907	5895.71	5454	788-18100	1.18991e-07	no
mouse	veh_injected	veh	23	158	2731.03	2699.5	842-5206	6441.66	5955	1184-18306	1.29284e-07	no
mouse	veh_injected	veh	22	165	3017.71	2914	1540-6142	6717.34	6009	2370-21324	3.50444e-11	no
mouse	veh_injected	veh	5	609	2961.62	2865	540-6116	6694.64	6056	665-25258	2.56738e-19	no
mouse	veh_injected	veh	11	477	3218.93	3110	972-6719	7632.71	6545	1296-31946	2.1013e-19	no
mouse	veh_injected	veh	10	511	3204.63	3101	1002-7152	7669.91	6625	1415-32827	2.74342e-22	no
mouse	veh_injected	veh	9	519	3206.43	3127	996-7183	7670.46	6869	1266-31529	3.15831e-19	no
mouse	veh_injected	veh	13	338	3549.2	3416	884-7818	9174.7	7655.5	1170-39014	1.32198e-16	no
mouse	veh_injected	veh	8	524	3650.64	3489	943-6723	9444.05	8062.5	1246-28742	2.37113e-17	no
mouse	veh_injected	veh	7	528	3708.24	3622.5	1053-7215	9509.61	8290	1589-33732	1.59372e-18	no
mouse	veh_injected	veh	6	540	3869.18	3797.5	880-8012	10613.7	9139.5	1149-44128	1.36974e-21	no
mouse	veh_injected	veh	21	167	4117.83	4044	1623-7992	10820.3	9254	2726-36098	4.3047e-12	no
mouse	veh_injected	veh	2	1563	3936.69	3887	539-12021	10984.2	9592	725-132277	8.00162e-44	no
mouse	veh_injected	veh	0	2291	4095.9	4015	986-8977	11322.8	9760	1334-68408	5.70814e-42	no
mouse	veh_injected	veh	19	196	4331.41	4141.5	1541-9597	12307.6	10293	2679-61561	4.24709e-16	no
mouse	veh_injected	veh	12	369	4207.98	4179	1527-9023	12098.4	10636	2309-56364	4.73001e-16	no
mouse	veh_injected	veh	28	66	4386.05	4271.5	2727-7116	13656.1	12248.5	5398-32539	0.000327185	no
mouse	veh_injected	veh	25	117	4890.33	4833	1453-7448	16075.2	14302	2074-39802	0.000342896	no
mouse	refed	refed	25	102	834.696	762	509-2194	1279.47	1162	714-4144	3.21955e-10	no
mouse	refed	refed	14	224	1068.04	912.5	500-3663	1790.92	1288	615-10784	1.60337e-21	no
mouse	refed	refed	19	176	1177.14	944.5	500-4474	1915.78	1367.5	627-11500	1.68017e-18	no
mouse	refed	refed	17	208	1241.02	1108	591-7187	1956.83	1541	728-28479	1.07285e-26	no
mouse	refed	refed	2	1568	1085.74	995.5	505-3894	1875.56	1556.5	651-11630	3.25876e-46	no
mouse	refed	refed	22	134	1293.84	1128	535-4228	2120.04	1679.5	708-11634	1.60095e-14	no
mouse	refed	refed	27	61	1397.52	1342	570-2892	2403.3	2156	753-7554	1.05718e-05	no
mouse	refed	refed	9	462	1365.82	1361	525-2527	2345.89	2252.5	661-5557	1.73356e-08	no
mouse	refed	refed	23	117	1666.71	1493	628-4116	2851.17	2313	814-11001	1.66714e-11	no
mouse	refed	refed	6	1049	1398.3	1318	666-6768	2613.39	2328	888-34642	8.35385e-49	no
mouse	refed	refed	0	1761	1444.94	1411	505-3449	2645.23	2447	624-10034	1.57183e-28	no
mouse	refed	refed	3	1523	1496.84	1432	519-4644	2761.7	2489	669-17147	4.74111e-36	no
mouse	refed	refed	16	209	1713.85	1715	641-3178	3213.78	3028	817-7586	9.40809e-08	no
mouse	refed	refed	15	222	2017.5	1943.5	537-4453	3636.1	3267	744-10250	8.13919e-09	no
mouse	refed	refed	28	52	2082.87	2025	896-4152	5123.4	4298.5	1439-12246	0.00203386	no
mouse	refed	refed	18	190	2509.37	2449	865-6862	5243.18	4578.5	1156-26627	4.98928e-15	no
mouse	refed	refed	26	84	2608.7	2508	1309-5378	5628.74	5024.5	2017-17417	3.96598e-08	no
mouse	refed	refed	7	831	2868.89	2823	808-5663	6444.46	5912	1126-21830	1.70916e-18	no
mouse	refed	refed	4	1281	3204.04	3051	852-8639	7998.04	6784	1122-47710	1.56813e-36	no
mouse	refed	refed	5	1146	3318.1	3202	845-8951	8392.74	6926.5	1123-54669	1.5291e-33	no
mouse	refed	refed	12	333	3518.34	3335	857-7517	9587.25	7652	1170-41896	1.98197e-20	no
mouse	refed	refed	11	338	3433.14	3294.5	1185-8794	8912.81	7703.5	1651-59146	6.90425e-21	no
mouse	refed	refed	20	172	3340.52	3262	898-6660	8926.17	7772.5	1150-34926	2.24409e-11	no
mouse	refed	refed	8	626	3467.39	3380	848-7634	9091.22	7821	1087-40953	3.61234e-24	no
mouse	refed	refed	24	112	3809.65	3890.5	2095-6105	10339	9900	3340-25844	2.21604e-05	no
mouse	refed	refed	21	157	4240.31	4099	1573-9195	12194.9	10004	2177-56404	5.8677e-15	no
mouse	refed	refed	1	1742	4169.79	4057.5	1423-9693	12032.1	10514.5	2226-64753	2.08123e-38	no
mouse	refed	refed	29	31	4325.19	4216	1863-7032	12019	10821	2961-27774	0.0472165	no
mouse	refed	refed	10	407	4652.42	4353	1043-12318	15421.3	11326	1466-140786	1.07773e-28	no
mouse	refed	refed	13	231	4655.32	4547	1061-9256	15640.4	12722	1462-76851	4.70799e-14	no
mouse	ad_libitum_fed	adlib	28	85	888.376	751	503-4296	1370.46	1097	667-9315	2.57643e-15	yes
mouse	ad_libitum_fed	adlib	27	103	1374.77	1060	551-7150	2438.95	1446	678-27495	2.11758e-18	no
mouse	ad_libitum_fed	adlib	3	1212	1027.8	954	500-3096	1733.42	1476.5	647-9887	1.72468e-37	no
mouse	ad_libitum_fed	adlib	15	273	1426.15	1119	507-6776	2597.37	1640	661-25720	6.68328e-26	no
mouse	ad_libitum_fed	adlib	24	146	1532.74	1227	502-5832	2813.97	1820.5	648-17541	5.7576e-17	no
mouse	ad_libitum_fed	adlib	29	73	1422.96	1316	561-4362	2314.1	1972	688-10835	2.51779e-10	no
mouse	ad_libitum_fed	adlib	1	1923	1367.49	1272	505-3578	2414.71	2037	629-10556	2.23634e-37	no
mouse	ad_libitum_fed	adlib	17	249	1403.06	1291	513-5060	2433.86	2039	634-12390	5.61587e-15	no
mouse	ad_libitum_fed	adlib	8	629	1427.57	1350	523-4675	2629.85	2293	678-13823	1.14187e-24	no
mouse	ad_libitum_fed	adlib	11	413	1793.79	1562	500-5587	3452.49	2410	618-18818	5.25987e-21	no
mouse	ad_libitum_fed	adlib	16	254	1768.44	1508	502-7921	3544.07	2544.5	645-42781	1.15056e-25	no
mouse	ad_libitum_fed	adlib	18	210	2091.84	1856.5	634-5423	3808.36	3011.5	798-15868	1.75749e-15	no
mouse	ad_libitum_fed	adlib	30	28	2002.86	1826.5	1001-3433	4678.21	3785.5	1533-12667	0.00429534	no
mouse	ad_libitum_fed	adlib	14	304	2369.45	2291.5	517-4952	4752.43	4218	660-17502	4.33214e-15	no
mouse	ad_libitum_fed	adlib	6	717	2532.33	2398	753-6033	5432.22	4547	947-23005	2.33266e-24	no
mouse	ad_libitum_fed	adlib	23	160	2653.21	2554	574-5462	6425.1	5179.5	760-24115	9.59163e-11	no
mouse	ad_libitum_fed	adlib	9	546	2828.99	2662	1002-6821	6486.69	5351.5	1454-30788	1.91566e-23	no
mouse	ad_libitum_fed	adlib	7	706	2873.33	2704.5	835-6901	6643.73	5564	1156-33530	2.51172e-26	no
mouse	ad_libitum_fed	adlib	4	1055	2895.82	2727	736-7993	6818.57	5578	1022-49176	4.00988e-34	no
mouse	ad_libitum_fed	adlib	26	115	2848.62	2777	775-5668	6694.57	5842	1089-20898	1.07476e-07	no
mouse	ad_libitum_fed	adlib	10	515	3160.59	2992	1079-6789	7503.08	6201	1642-31820	2.59073e-20	no
mouse	ad_libitum_fed	adlib	2	1605	3173.41	3035	848-8789	7844.21	6374	1127-52051	1.38422e-38	no
mouse	ad_libitum_fed	adlib	5	785	3207.82	3062	666-8128	8046.65	6689	852-44927	1.13856e-27	no
mouse	ad_libitum_fed	adlib	20	201	3526.3	3286	617-7705	8886.38	7003	938-37929	7.84929e-13	no
mouse	ad_libitum_fed	adlib	21	189	3276.71	3185	1020-6741	8404.53	7110	1594-34610	1.37612e-14	no
mouse	ad_libitum_fed	adlib	13	394	3368.04	3167	1216-8482	8841.38	7382	1732-54673	4.93305e-22	no
mouse	ad_libitum_fed	adlib	12	407	3580.29	3391	1565-8817	9417.41	7670	2344-57134	1.0635e-25	no
mouse	ad_libitum_fed	adlib	0	2067	3604.89	3451	1021-14001	9580	7785	1426-269658	1.15268e-59	no
mouse	ad_libitum_fed	adlib	19	202	3814.13	3658.5	1209-10938	10204.6	8208.5	1874-80757	5.18907e-19	no
mouse	ad_libitum_fed	adlib	31	27	3539.74	3379	1667-5991	10680.3	8865	2803-28987	0.000257796	no
mouse	ad_libitum_fed	adlib	25	137	3592.29	3556	1301-6754	10440	8890	1961-38824	8.78991e-11	no
mouse	ad_libitum_fed	adlib	22	180	3845.22	3817.5	1352-8107	10714.1	9248	1981-45059	1.54848e-11	no
mouse	fasted	fast	16	239	978.1	752	500-3579	1566.62	1014	616-12905	7.15617e-23	yes
mouse	fasted	fast	9	1018	1583.74	1542.5	547-3122	2519.4	2326.5	676-7107	1.76126e-20	no
mouse	fasted	fast	25	129	1668.54	1421	518-5534	3244.72	2387	658-18068	7.25111e-13	no
mouse	fasted	fast	1	2461	1406.89	1394	506-3425	2552.82	2406	662-9773	3.67478e-28	no
mouse	fasted	fast	28	107	1669.86	1547	533-3571	2857.66	2453	662-8569	1.6688e-07	no
mouse	fasted	fast	29	102	1812.95	1622	672-5927	3449.78	2734	854-20842	1.17621e-13	no
mouse	fasted	fast	21	165	1842.71	1645	775-7884	3652.73	2825	1172-36914	1.86025e-21	no
mouse	fasted	fast	0	3163	1591.06	1534	611-3755	3192.87	2887	916-12408	1.86115e-40	no
mouse	fasted	fast	31	96	2109.69	1950.5	725-5186	4781.98	3959.5	998-19928	2.62936e-09	no
mouse	fasted	fast	4	1615	2067.93	2006	679-4785	4448.07	4067	951-18095	1.15353e-33	no
mouse	fasted	fast	3	1933	2051.69	1985	766-4989	4596.86	4206	1137-18695	1.83185e-34	no
mouse	fasted	fast	22	136	2316.12	2324.5	797-6565	4886.01	4569.5	1077-22369	6.11364e-12	no
mouse	fasted	fast	8	1137	2249.03	2218	512-4585	4909.04	4574	684-16839	2.57221e-20	no
mouse	fasted	fast	13	516	2483.56	2423.5	610-4915	5377.49	4760.5	790-21025	5.93961e-15	no
mouse	fasted	fast	27	109	2945.72	2899	1056-7645	6543.92	5910	1408-32768	1.21903e-12	no
mouse	fasted	fast	17	232	2471.93	2451.5	958-4460	6906.22	6299.5	1629-20523	2.0622e-07	no
mouse	fasted	fast	20	186	2954.74	2833.5	1526-4962	7625.1	6899.5	2564-20267	6.95316e-09	no
mouse	fasted	fast	30	101	3186.68	3101	630-6560	8148.18	7225	783-41696	1.66724e-12	no
mouse	fasted	fast	33	72	3650.51	3399.5	1257-9114	9382.5	7493.5	1750-49235	8.61537e-11	no
mouse	fasted	fast	18	228	3680.96	3642	914-7485	9294.05	8326.5	1196-36516	1.83191e-11	no
mouse	fasted	fast	24	131	3453.1	3407	1573-6750	8769.38	8329	2671-28111	1.04809e-07	no
mouse	fasted	fast	7	1152	4038.65	3973	854-8644	11239	9746.5	1152-52878	1.30649e-31	no
mouse	fasted	fast	12	589	4371.05	4241	898-9577	13508.9	11413	1286-80418	9.16064e-25	no
mouse	fasted	fast	15	336	4243.95	4127	791-8601	13911.4	11839.5	1042-54143	2.74855e-14	no
mouse	fasted	fast	2	1942	4865.35	4752	1215-13141	16350.9	13495.5	1986-221286	1.04949e-47	no
mouse	fasted	fast	6	1328	4939.75	4811.5	1414-10690	16379.3	13515.5	2240-79832	8.49035e-35	no
mouse	fasted	fast	11	811	4789.6	4731	1182-9149	15980	13824	1807-71108	5.05042e-25	no
mouse	fasted	fast	32	78	5211.24	5140.5	2518-8943	16317.5	14025.5	4865-58038	2.42822e-06	no
mouse	fasted	fast	14	448	5136.23	4991	1719-9888	18267	15370	2909-84295	1.11666e-19	no
mouse	fasted	fast	26	120	5025.66	5021.5	1737-8591	17458.9	15679	2907-59046	2.6478e-09	no
mouse	fasted	fast	10	859	5514.69	5392	1807-9732	19119.2	16281	2980-70580	1.86021e-26	no
mouse	fasted	fast	23	131	5483.77	5576	1608-9733	18531	16343	3055-67268	5.01592e-08	no
mouse	fasted	fast	5	1565	5857.31	5768	1341-10870	23323.1	18698	2086-120778	4.82263e-38	no
mouse	fasted	fast	19	199	6251.46	6157	2162-10175	26810.5	22666	4205-87440	8.02726e-11	no
mouse	fasted	fast	34	71	6705.68	6420	2853-10539	31109.6	22985	5692-97648	2.28965e-07	no
mouse	refed2	refed	16	314	1124.48	987.5	505-6229	1958.55	1392.5	621-19084	1.7609e-26	yes
mouse	refed2	refed	26	87	1404.22	1232	579-3433	2590.56	2087	827-9420	7.95327e-11	no
mouse	refed2	refed	23	139	1908.82	1406	585-7469	4280.81	2206	830-38031	2.16831e-18	no
mouse	refed2	refed	0	2418	1316.27	1297	508-3914	2441.53	2305	660-18562	8.92061e-57	no
mouse	refed2	refed	9	727	1598.81	1552	543-3471	2614.98	2402	675-8673	7.50186e-18	no
mouse	refed2	refed	25	102	1682.78	1556.5	648-4179	3039.67	2556	802-10298	2.34602e-09	no
mouse	refed2	refed	27	87	1692.68	1616	864-4065	2982.83	2612	1207-11363	3.92004e-11	no
mouse	refed2	refed	5	1263	1676.41	1622	523-4355	3492.99	3172	728-16952	1.45714e-32	no
mouse	refed2	refed	2	1726	1804.88	1741.5	648-4500	3874.27	3516.5	902-18418	7.15935e-36	no
mouse	refed2	refed	29	81	1788.64	1802	957-3295	3850.75	3646	1476-9569	4.09503e-05	no
mouse	refed2	refed	3	1683	1894.82	1846	980-4192	4288.67	4020	1774-16490	3.76692e-35	no
mouse	refed2	refed	22	162	2228.33	2162.5	1005-5701	4757.54	4252.5	1614-19828	7.42978e-14	no
mouse	refed2	refed	6	1227	2205.53	2189	501-4875	5114.51	4723	660-19662	3.99709e-21	no
mouse	refed2	refed	8	1204	2311.99	2233.5	772-5076	5488.23	4937	1106-21635	9.56867e-29	no
mouse	refed2	refed	13	463	2498.72	2432	700-5297	5705.67	5089	966-21367	1.50961e-16	no
mouse	refed2	refed	33	54	2763.04	2651.5	1109-5853	6580.63	5575	1620-19421	4.13521e-05	no
mouse	refed2	refed	31	72	2753.15	2797.5	714-4956	6018.65	5703.5	910-16181	0.00103322	no
mouse	refed2	refed	32	61	3506.8	3162	977-10675	10080.6	6534	1507-105144	5.41175e-14	no
mouse	refed2	refed	20	200	3433.7	3349	867-6144	8598.02	7541.5	1215-29150	1.01103e-10	no
mouse	refed2	refed	24	129	3366.21	3275	1129-6651	8910.29	8002	1732-25611	2.20193e-07	no
mouse	refed2	refed	35	33	3506.79	3693	1826-5690	9013.67	8861	3067-19261	0.0965858	no
mouse	refed2	refed	15	377	3684.08	3644	1044-7520	10084.5	8968	1635-38902	3.1819e-16	no
mouse	refed2	refed	14	440	4183.15	4070	983-8405	13096	11048.5	1633-71749	7.97636e-22	no
mouse	refed2	refed	7	1213	4472.76	4414	1290-9494	13791.6	11936	2107-101797	5.64792e-34	no
mouse	refed2	refed	17	300	4737.79	4523.5	1228-9317	16149	13013.5	2106-73603	2.75613e-18	no
mouse	refed2	refed	12	465	4740.4	4650	920-8528	15743.7	13651	1264-56627	4.13956e-17	no
mouse	refed2	refed	1	1818	4888.16	4705.5	1661-11642	16936.9	13749.5	2744-169619	4.90536e-44	no
mouse	refed2	refed	18	283	5014.99	4845	1043-10520	17695.2	14432	1485-99257	2.86427e-18	no
mouse	refed2	refed	11	525	5115.28	4958	1709-10456	18683.1	15201	3415-101081	1.07022e-24	no
mouse	refed2	refed	10	578	5295.87	5240.5	1403-10556	18313.5	15739.5	2074-85672	6.5297e-22	no
mouse	refed2	refed	28	82	5389.87	5442	1419-8388	18746.5	16093	3011-56401	0.000102658	no
mouse	refed2	refed	21	180	5168.17	5168.5	1514-9497	19263.7	16857	2626-85447	7.60843e-14	no
mouse	refed2	refed	30	79	5679.7	5626	2248-9850	19916.9	17272	3877-70543	7.17445e-08	no
mouse	refed2	refed	4	1294	5759.74	5655.5	1466-10617	23205.3	18863.5	2203-127603	1.66542e-33	no
mouse	refed2	refed	37	29	5356.83	4992	3582-8342	23570.8	19593	9198-56829	0.0132268	no
mouse	refed2	refed	36	32	6100.16	6141	3155-9040	23219.1	20857.5	6207-63707	0.0049552	no
mouse	refed2	refed	19	260	5997.43	6033	947-10748	27742.3	22503.5	1607-120301	6.82035e-14	no
mouse	refed2	refed	34	41	7190.66	7638	2903-10445	40757.7	39348	5747-102761	0.317894	no
rat	ad_libitum_fed	ratadlib	0	856	1012.56	1007.5	752-1595	1451.66	1428	976-2458	2.69205e-09	no
rat	ad_libitum_fed	ratadlib	47	40	1214.95	1114.5	766-2077	1760.15	1547	945-3418	0.00124997	no
rat	ad_libitum_fed	ratadlib	40	59	1228.27	1143	767-2664	1797.73	1587	957-5012	6.69603e-08	no
rat	ad_libitum_fed	ratadlib	23	236	1166.64	1154.5	842-1767	1686.74	1656	1101-2639	0.0138931	no
rat	ad_libitum_fed	ratadlib	8	466	1250.39	1216	761-2207	1823.89	1727	938-4160	2.58293e-15	no
rat	ad_libitum_fed	ratadlib	9	441	1226.62	1193	751-3070	2058.24	1885	999-9346	1.07415e-25	no
rat	ad_libitum_fed	ratadlib	37	74	1478.76	1292	758-4499	2591.16	1960.5	981-14833	2.08914e-12	no
rat	ad_libitum_fed	ratadlib	49	31	1478.9	1371	753-3254	2471	2092	955-8326	1.45861e-05	no
rat	ad_libitum_fed	ratadlib	1	700	1391.28	1372	884-2098	2242.12	2171	1263-3985	1.84784e-09	no
rat	ad_libitum_fed	ratadlib	18	318	1444.64	1432	754-3291	2240.21	2196	923-6082	4.36788e-09	no
rat	ad_libitum_fed	ratadlib	12	394	1373.39	1342.5	969-2621	2303.97	2205.5	1432-5890	2.45192e-15	no
rat	ad_libitum_fed	ratadlib	51	17	1310.18	1388	809-2229	2019.35	2220	1038-3612	0.36834	no
rat	ad_libitum_fed	ratadlib	3	580	1423.11	1398	925-3057	2363.28	2270.5	1299-6496	1.07917e-17	no
rat	ad_libitum_fed	ratadlib	11	395	1584.98	1545	1042-2475	2619.26	2541	1481-4764	1.89094e-08	no
rat	ad_libitum_fed	ratadlib	26	191	1635.77	1482	992-3190	3146.43	2551	1458-10666	1.55408e-15	no
rat	ad_libitum_fed	ratadlib	16	350	1797.15	1804.5	1044-2860	2818.45	2769.5	1352-5203	0.00237023	no
rat	ad_libitum_fed	ratadlib	48	38	1859.47	1817.5	1171-2710	3170.71	2922	1587-5880	0.00408357	no
rat	ad_libitum_fed	ratadlib	6	503	1953.61	1948	821-3345	3236.08	3042	1053-8161	1.60157e-12	no
rat	ad_libitum_fed	ratadlib	7	479	1961.49	1915	1035-3376	3427.87	3214	1373-8314	4.55377e-16	no
rat	ad_libitum_fed	ratadlib	4	568	1899.31	1827	1121-3755	3652.29	3394	1717-11080	2.0003e-21	no
rat	ad_libitum_fed	ratadlib	45	45	2090.64	2011	1244-4299	4057.62	3721	1652-10379	0.00155128	no
rat	ad_libitum_fed	ratadlib	36	86	2344.84	2239	1165-4315	4183.93	3725	1540-12278	5.49413e-07	no
rat	ad_libitum_fed	ratadlib	13	386	2158.11	2056.5	1232-6431	4283.61	3898	1877-23100	9.76197e-28	no
rat	ad_libitum_fed	ratadlib	44	50	2469.02	2258	1136-5425	4815.26	4084	1545-13882	0.000271587	no
rat	ad_libitum_fed	ratadlib	22	257	2369.53	2350	1140-5006	4545.34	4331	1498-16525	3.44372e-14	no
rat	ad_libitum_fed	ratadlib	50	24	2734.17	2504	1204-5586	5735.75	4573	1679-15885	0.00120313	no
rat	ad_libitum_fed	ratadlib	19	318	2605.48	2565	1701-4468	5199.34	4913.5	2589-14041	3.12002e-12	no
rat	ad_libitum_fed	ratadlib	43	54	2933	2823	1539-5072	5824.7	5183	2183-13103	0.00368566	no
rat	ad_libitum_fed	ratadlib	34	103	3128.28	3147	1365-5232	6246.88	6155	1937-15421	0.00103863	no
rat	ad_libitum_fed	ratadlib	52	10	3307.2	3203	2208-4711	6681.1	6245.5	3457-12038	0.30781	no
rat	ad_libitum_fed	ratadlib	33	123	3188.42	3171	1625-5614	6687.22	6382	2248-17726	5.87126e-06	no
rat	ad_libitum_fed	ratadlib	24	230	3758.07	3712.5	1048-7109	8595.37	7433	1319-28392	4.43899e-13	no
rat	ad_libitum_fed	ratadlib	28	184	3833.6	3867	1215-6006	8312.14	7826	1753-20470	6.82767e-05	no
rat	ad_libitum_fed	ratadlib	20	298	3965.04	3920	1393-6774	9301.85	8247	2120-24582	4.16328e-12	no
rat	ad_libitum_fed	ratadlib	2	589	4183.03	4089	1463-8143	10132.4	9014	1872-39592	1.49081e-20	no
rat	ad_libitum_fed	ratadlib	15	364	4248.73	4173.5	2163-7920	10557.5	9448.5	3449-42124	1.1724e-17	no
rat	ad_libitum_fed	ratadlib	17	332	4293.58	4224.5	1102-8929	11282.1	10102.5	1378-64668	2.06899e-19	no
rat	ad_libitum_fed	ratadlib	21	290	4453.42	4340	1779-7302	12012.1	10867	2495-29952	1.75649e-10	no
rat	ad_libitum_fed	ratadlib	31	130	4559.68	4504.5	1491-8280	13056.3	11050.5	2080-47550	3.853e-08	no
rat	ad_libitum_fed	ratadlib	14	383	4830.63	4740	1630-9384	13516.2	11233	2207-81470	1.30067e-21	no
rat	ad_libitum_fed	ratadlib	29	179	4625.46	4611	1264-7510	12785.4	11351	1626-41433	1.66883e-09	no
rat	ad_libitum_fed	ratadlib	10	408	4922.3	4863.5	2044-8718	13497.3	11814	2829-50086	1.28654e-15	no
rat	ad_libitum_fed	ratadlib	41	59	4802	4696	3055-6888	12838.5	11916	5610-30269	0.00129201	no
rat	ad_libitum_fed	ratadlib	39	60	5084.6	4987.5	3343-7761	13711.4	12370	5572-35309	9.47403e-07	no
rat	ad_libitum_fed	ratadlib	27	188	5149.18	5009	3012-8275	15179	13017.5	5232-45991	6.27958e-12	no
rat	ad_libitum_fed	ratadlib	32	126	5029.81	4990.5	1683-7728	14881.7	13383	2231-41125	1.24409e-07	no
rat	ad_libitum_fed	ratadlib	35	98	5412.69	5430	2743-7923	15708.3	14279.5	4068-35592	0.000801234	no
rat	ad_libitum_fed	ratadlib	46	41	5307.29	5389	2834-9202	15628.7	15332	4903-46928	0.000164631	no
rat	ad_libitum_fed	ratadlib	25	192	5422.69	5326	3036-8888	19518.1	17073	5882-65504	3.9875e-11	no
rat	ad_libitum_fed	ratadlib	5	505	5596.66	5546	1721-8872	20333	17434	2621-82503	5.00827e-22	no
rat	ad_libitum_fed	ratadlib	30	175	6097.5	6079	1756-8910	22757.6	19552	2865-81750	4.49669e-11	no
rat	ad_libitum_fed	ratadlib	42	55	6321.91	6232	3634-9337	23601.1	20484	7746-65192	0.000229276	no
rat	ad_libitum_fed	ratadlib	38	63	7130.29	7273	3334-9510	32440.4	30738	5663-76927	0.162167	no
Dowsett	ad_libitum_fed	Dow_adlib	22	25	767.24	698	501-1428	1232.04	1101	671-2883	0.00161689	yes
Dowsett	ad_libitum_fed	Dow_adlib	15	153	1157.94	1035	511-4573	1791.08	1470	624-11042	4.41669e-22	no
Dowsett	ad_libitum_fed	Dow_adlib	21	47	1137.81	1055	547-2364	1935.36	1715	815-5165	0.000158034	no
Dowsett	ad_libitum_fed	Dow_adlib	1	1027	1140.37	1125	515-2274	2195.26	2130	723-5465	4.08021e-21	no
Dowsett	ad_libitum_fed	Dow_adlib	4	507	1219.15	1212	546-2180	2324.71	2271	809-5454	3.5476e-10	no
Dowsett	ad_libitum_fed	Dow_adlib	3	593	1511.11	1503	502-2948	3065.12	2969	667-7672	1.05204e-11	no
Dowsett	ad_libitum_fed	Dow_adlib	8	323	1597.85	1529	526-3990	3186.19	3019	733-10703	2.23643e-15	no
Dowsett	ad_libitum_fed	Dow_adlib	10	273	1722.81	1696	660-3292	3174.72	3041	961-7739	9.00118e-11	no
Dowsett	ad_libitum_fed	Dow_adlib	9	302	1562.08	1418.5	547-3910	3737.01	3127.5	851-10686	2.33622e-14	no
Dowsett	ad_libitum_fed	Dow_adlib	14	198	1987.15	1902.5	732-3472	4566.57	4223	1189-10343	1.47729e-07	no
Dowsett	ad_libitum_fed	Dow_adlib	20	61	2030.9	2027	510-3089	4706	4790	632-10102	0.279418	no
Dowsett	ad_libitum_fed	Dow_adlib	13	208	2723.46	2653	670-4745	5803.08	5360	964-12426	1.78107e-07	no
Dowsett	ad_libitum_fed	Dow_adlib	7	341	2807.37	2743	883-5198	6176.67	5902	1301-15967	1.42144e-10	no
Dowsett	ad_libitum_fed	Dow_adlib	18	100	2791.91	2801	871-5316	6577.69	6043	1267-22540	1.38672e-10	no
Dowsett	ad_libitum_fed	Dow_adlib	5	475	3336.39	3214	1126-6918	8192.53	7265	1936-27811	5.30981e-19	no
Dowsett	ad_libitum_fed	Dow_adlib	0	1322	3537.73	3401	588-7427	8835.14	7938	813-30828	9.6114e-30	no
Dowsett	ad_libitum_fed	Dow_adlib	11	270	3475.56	3480.5	800-6057	8819.76	8089.5	1170-21491	2.21651e-08	no
Dowsett	ad_libitum_fed	Dow_adlib	12	228	3705.07	3580	1443-6534	10030.2	9076	2480-26213	3.97242e-11	no
Dowsett	ad_libitum_fed	Dow_adlib	16	143	3835.01	3831	1396-6500	9813.5	9212	2195-25118	0.000567631	no
Dowsett	ad_libitum_fed	Dow_adlib	19	71	3676.72	3620	1161-5787	10083.7	9331	3238-21434	0.0448748	no
Dowsett	ad_libitum_fed	Dow_adlib	6	385	3862.7	3794	950-7712	10608.9	9756	1571-37991	3.14497e-12	no
Dowsett	ad_libitum_fed	Dow_adlib	2	882	4401.47	4402.5	780-9082	13329	12068.5	1148-52380	1.61145e-20	no
Dowsett	ad_libitum_fed	Dow_adlib	17	124	4820.43	4920.5	652-7480	16235.3	15860	869-40415	0.026061	no
Dowsett	fasted	Dow_fast	14	249	1116.32	997	503-3645	1678.63	1396	652-7790	3.30686e-24	yes
Dowsett	fasted	Dow_fast	19	105	999.6	907	505-3728	1738.66	1487	689-8233	1.2513e-12	yes
Dowsett	fasted	Dow_fast	1	1171	1148.27	1128	566-3335	2106.35	2026	838-9132	3.47657e-34	no
Dowsett	fasted	Dow_fast	3	680	1297.69	1194.5	505-3971	2758.62	2316.5	685-10902	1.08727e-27	no
Dowsett	fasted	Dow_fast	2	847	1378.01	1361	517-2809	2634.9	2544	753-7403	7.90101e-16	no
Dowsett	fasted	Dow_fast	10	294	1754.92	1589.5	510-6653	3397.64	2766	694-25911	9.16914e-29	no
Dowsett	fasted	Dow_fast	7	331	1499.04	1463	538-3094	2894.08	2802	714-7085	2.52461e-10	no
Dowsett	fasted	Dow_fast	17	151	1947.56	1880	532-3278	4395.9	3987	842-10407	1.44174e-08	no
Dowsett	fasted	Dow_fast	23	58	1974.48	1915.5	536-4413	4312.03	4026	1080-12172	0.00013009	no
Dowsett	fasted	Dow_fast	16	158	2432.68	2411	1144-3698	4829.66	4701.5	1776-8891	0.00367845	no
Dowsett	fasted	Dow_fast	4	434	2631.42	2558.5	669-4769	5570.39	5246.5	923-13406	5.01788e-11	no
Dowsett	fasted	Dow_fast	11	282	2827.11	2817.5	1012-4834	6273.26	6082	1613-14564	2.18141e-08	no
Dowsett	fasted	Dow_fast	9	308	2874.52	2886.5	1032-5350	6366.02	6153	1684-15753	8.7446e-10	no
Dowsett	fasted	Dow_fast	22	63	2738.02	2786	899-3782	6225.03	6206	1321-9879	0.527522	no
Dowsett	fasted	Dow_fast	13	254	3122.4	3080	835-5599	6976.55	6574.5	1226-17247	9.94314e-08	no
Dowsett	fasted	Dow_fast	8	330	3237.12	3187	1561-5603	7462.02	7136.5	2590-18588	2.0382e-09	no
Dowsett	fasted	Dow_fast	12	255	3270.74	3222	987-5741	7901.57	7407	1517-20177	2.19765e-06	no
Dowsett	fasted	Dow_fast	5	388	3364.9	3333.5	1211-6536	8132.17	7679	2001-25039	8.63552e-15	no
Dowsett	fasted	Dow_fast	25	18	3697.33	3677	2807-5399	8747.44	8462	5814-16300	0.00452238	no
Dowsett	fasted	Dow_fast	21	71	3387.44	3255	1076-5548	9214.46	8594	1771-21370	0.0350222	no
Dowsett	fasted	Dow_fast	15	165	3733.29	3738	1553-7028	9413.23	8818	2474-27873	2.61596e-06	no
Dowsett	fasted	Dow_fast	6	355	3723.28	3608	1731-6643	10009.2	8857	2885-32215	1.21863e-15	no
Dowsett	fasted	Dow_fast	0	1567	3870.75	3792	695-7497	10259.7	9242	963-38606	1.99464e-27	no
Dowsett	fasted	Dow_fast	20	76	4868.62	5059.5	1637-6790	15112.1	15688.5	2901-28371	0.700858	no
Dowsett	fasted	Dow_fast	18	134	5021.59	4990	1277-8183	17637.9	16254	2271-44851	2.09504e-05	no
Dowsett	fasted	Dow_fast	24	37	6240.59	6431	2509-7860	25960.6	25998	5467-43610	0.577626	no
