# Supplementary material for: A unified rodent atlas reveals the cellular complexity and evolutionary divergence of the dorsal vagal complex
Source: eLife. 2025 Oct 7;14:RP106217. doi: 10.7554/eLife.106217 (PMC12503491; doi:10.7554/eLife.106217)
Supplement: Supplementary file 12. — Number of doublets and singlets identified by DoubletFinder (McGinnis et al., 2019) after initial filtering of our and Dowset dataset per sample. Doublets were removed from the datasets before sample integration with Harmony (Korsunsky et al., 2019) (this step was not performed in the rat dataset as it was only one sample, n = 2 rat DVC). [file elife-106217-supp12.xlsx]

## Sheet: S12
species	treatment	sample	doublets	singlets
mouse	licl_injected	licl	1114	16466
mouse	veh_injected	veh	837	13646
mouse	refed	refed	889	14660
mouse	ad_libitum_fed	adlib	958	14867
mouse	fasted	fast	1658	21608
mouse	refed2	refed2	1421	18493
rat	ad_libitum_fed	ratadlib	974	12167
Dowsett	ad_libitum_fed	Dow_adlib	256	7777
Dowsett	fasted	Dow_fast	273	8154
